# Supplementary material for: Substitution effect on chalcone based materials for corrosion and photocrosslinking applications
Source: Royal Society of Chemistry journal article supplement (doi:10.1039/c4ra10884a), 2014-11-19
Supplement: c4ra10884a1.out [file c4ra10884a1.out]

 Entering Link 1 = C:\G09W\l1.exe PID=      3572.
  
 Copyright (c) 1988,1990,1992,1993,1995,1998,2003,2009, Gaussian, Inc.
                  All Rights Reserved.
  
 This is part of the Gaussian(R) 09 program.  It is based on
 the Gaussian(R) 03 system (copyright 2003, Gaussian, Inc.),
 the Gaussian(R) 98 system (copyright 1998, Gaussian, Inc.),
 the Gaussian(R) 94 system (copyright 1995, Gaussian, Inc.),
 the Gaussian 92(TM) system (copyright 1992, Gaussian, Inc.),
 the Gaussian 90(TM) system (copyright 1990, Gaussian, Inc.),
 the Gaussian 88(TM) system (copyright 1988, Gaussian, Inc.),
 the Gaussian 86(TM) system (copyright 1986, Carnegie Mellon
 University), and the Gaussian 82(TM) system (copyright 1983,
 Carnegie Mellon University). Gaussian is a federally registered
 trademark of Gaussian, Inc.
  
 This software contains proprietary and confidential information,
 including trade secrets, belonging to Gaussian, Inc.
  
 This software is provided under written license and may be
 used, copied, transmitted, or stored only in accord with that
 written license.
  
 The following legend is applicable only to US Government
 contracts under FAR:
  
                    RESTRICTED RIGHTS LEGEND
  
 Use, reproduction and disclosure by the US Government is
 subject to restrictions as set forth in subparagraphs (a)
 and (c) of the Commercial Computer Software - Restricted
 Rights clause in FAR 52.227-19.
  
 Gaussian, Inc.
 340 Quinnipiac St., Bldg. 40, Wallingford CT 06492
  
  
 ---------------------------------------------------------------
 Warning -- This program may not be used in any manner that
 competes with the business of Gaussian, Inc. or will provide
 assistance to any competitor of Gaussian, Inc.  The licensee
 of this program is prohibited from giving any competitor of
 Gaussian, Inc. access to this program.  By using this program,
 the user acknowledges that Gaussian, Inc. is engaged in the
 business of creating and licensing software in the field of
 computational chemistry and represents and warrants to the
 licensee that it is not a competitor of Gaussian, Inc. and that
 it will not use this program in any manner prohibited above.
 ---------------------------------------------------------------
  

 Cite this work as:
 Gaussian 09, Revision A.02,
 M. J. Frisch, G. W. Trucks, H. B. Schlegel, G. E. Scuseria, 
 M. A. Robb, J. R. Cheeseman, G. Scalmani, V. Barone, B. Mennucci, 
 G. A. Petersson, H. Nakatsuji, M. Caricato, X. Li, H. P. Hratchian, 
 A. F. Izmaylov, J. Bloino, G. Zheng, J. L. Sonnenberg, M. Hada, 
 M. Ehara, K. Toyota, R. Fukuda, J. Hasegawa, M. Ishida, T. Nakajima, 
 Y. Honda, O. Kitao, H. Nakai, T. Vreven, J. A. Montgomery, Jr., 
 J. E. Peralta, F. Ogliaro, M. Bearpark, J. J. Heyd, E. Brothers, 
 K. N. Kudin, V. N. Staroverov, R. Kobayashi, J. Normand, 
 K. Raghavachari, A. Rendell, J. C. Burant, S. S. Iyengar, J. Tomasi, 
 M. Cossi, N. Rega, J. M. Millam, M. Klene, J. E. Knox, J. B. Cross, 
 V. Bakken, C. Adamo, J. Jaramillo, R. Gomperts, R. E. Stratmann, 
 O. Yazyev, A. J. Austin, R. Cammi, C. Pomelli, J. W. Ochterski, 
 R. L. Martin, K. Morokuma, V. G. Zakrzewski, G. A. Voth, 
 P. Salvador, J. J. Dannenberg, S. Dapprich, A. D. Daniels, 
 O. Farkas, J. B. Foresman, J. V. Ortiz, J. Cioslowski, 
 and D. J. Fox, Gaussian, Inc., Wallingford CT, 2009.
 
 ******************************************
 Gaussian 09:  IA32W-G09RevA.02 11-Jun-2009
                23-Jun-2013 
 ******************************************
 %chk=Chalcone-1 DFT631Gdp.chk
 ----------------------
 # B3LYP/6-31G(d,p) Opt
 ----------------------
 1/14=-1,18=20,19=15,26=3,38=1/1,3;
 2/9=110,12=2,17=6,18=5,40=1/2;
 3/5=1,6=6,7=101,11=2,16=1,25=1,30=1,71=1,74=-5/1,2,3;
 4//1;
 5/5=2,38=5/2;
 6/7=2,8=2,9=2,10=2,28=1/1;
 7//1,2,3,16;
 1/14=-1,18=20,19=15/3(2);
 2/9=110/2;
 99//99;
 2/9=110/2;
 3/5=1,6=6,7=101,11=2,16=1,25=1,30=1,71=1,74=-5/1,2,3;
 4/5=5,16=3/1;
 5/5=2,38=5/2;
 7//1,2,3,16;
 1/14=-1,18=20,19=15/3(-5);
 2/9=110/2;
 6/7=2,8=2,9=2,10=2,19=2,28=1/1;
 99/9=1/99;
 ----------
 CHALCONE-1
 ----------
 Symbolic Z-matrix:
 Charge =  0 Multiplicity = 1
 C
 C                    1    B1
 C                    2    B2       1    A1
 C                    3    B3       2    A2       1    D1       0
 C                    4    B4       3    A3       2    D2       0
 C                    5    B5       4    A4       3    D3       0
 O                    3    B6       2    A5       1    D4       0
 C                    6    B7       5    A6       4    D5       0
 C                    8    B8       6    A7       5    D6       0
 C                    9    B9       8    A8       6    D7       0
 C                    10   B10      9    A9       8    D8       0
 C                    11   B11      10   A10      9    D9       0
 C                    12   B12      11   A11      10   D10      0
 C                    13   B13      12   A12      11   D11      0
 C                    14   B14      13   A13      12   D12      0
 C                    15   B15      14   A14      13   D13      0
 O                    14   B16      13   A15      12   D14      0
 C                    7    B17      3    A16      2    D15      0
 C                    18   B18      7    A17      3    D16      0
 C                    19   B19      18   A18      7    D17      0
 C                    20   B20      19   A19      18   D18      0
 C                    21   B21      20   A20      19   D19      0
 C                    22   B22      21   A21      20   D20      0
 C                    23   B23      22   A22      21   D21      0
 O                    10   B24      9    A23      8    D22      0
 H                    1    B25      2    A24      3    D23      0
 H                    2    B26      1    A25      6    D24      0
 H                    4    B27      3    A26      2    D25      0
 H                    5    B28      4    A27      3    D26      0
 H                    8    B29      6    A28      5    D27      0
 H                    9    B30      8    A29      6    D28      0
 H                    12   B31      11   A30      10   D29      0
 H                    13   B32      12   A31      11   D30      0
 H                    15   B33      14   A32      13   D31      0
 H                    16   B34      15   A33      14   D32      0
 H                    17   B35      14   A34      13   D33      0
 H                    18   B36      7    A35      3    D34      0
 H                    18   B37      7    A36      3    D35      0
 H                    20   B38      19   A37      18   D36      0
 H                    21   B39      20   A38      19   D37      0
 H                    22   B40      21   A39      20   D38      0
 H                    23   B41      22   A40      21   D39      0
 H                    24   B42      23   A41      22   D40      0
       Variables:
  B1                    1.38247                  
  B2                    1.40695                  
  B3                    1.40003                  
  B4                    1.39396                  
  B5                    1.40427                  
  B6                    1.36078                  
  B7                    1.45713                  
  B8                    1.34954                  
  B9                    1.48187                  
  B10                   1.49729                  
  B11                   1.40468                  
  B12                   1.38756                  
  B13                   1.40186                  
  B14                   1.39947                  
  B15                   1.38973                  
  B16                   1.36205                  
  B17                   1.4307                   
  B18                   1.50855                  
  B19                   1.40063                  
  B20                   1.39355                  
  B21                   1.39714                  
  B22                   1.39449                  
  B23                   1.39618                  
  B24                   1.23257                  
  B25                   1.08539                  
  B26                   1.0849                   
  B27                   1.08309                  
  B28                   1.08666                  
  B29                   1.08916                  
  B30                   1.08395                  
  B31                   1.08446                  
  B32                   1.08822                  
  B33                   1.08467                  
  B34                   1.08422                  
  B35                   0.96659                  
  B36                   1.09788                  
  B37                   1.10018                  
  B38                   1.08544                  
  B39                   1.08614                  
  B40                   1.08602                  
  B41                   1.08603                  
  B42                   1.08721                  
  A1                  120.33762                  
  A2                  119.53588                  
  A3                  119.34855                  
  A4                  122.14037                  
  A5                  115.50193                  
  A6                  118.97809                  
  A7                  128.25999                  
  A8                  119.97928                  
  A9                  119.32576                  
  A10                 117.44664                  
  A11                 121.30788                  
  A12                 119.76811                  
  A13                 119.88636                  
  A14                 119.72081                  
  A15                 122.64454                  
  A16                 118.65219                  
  A17                 108.84599                  
  A18                 120.59678                  
  A19                 120.35247                  
  A20                 120.21807                  
  A21                 119.72251                  
  A22                 120.00759                  
  A23                 120.94439                  
  A24                 118.80124                  
  A25                 121.35293                  
  A26                 121.20056                  
  A27                 118.94814                  
  A28                 116.10561                  
  A29                 120.89627                  
  A30                 117.79743                  
  A31                 120.30981                  
  A32                 118.90633                  
  A33                 118.04851                  
  A34                 109.20149                  
  A35                 110.1757                   
  A36                 109.06831                  
  A37                 119.35216                  
  A38                 119.75709                  
  A39                 120.12976                  
  A40                 120.19027                  
  A41                 119.77786                  
  D1                    0.04039                  
  D2                   -0.07888                  
  D3                    0.07559                  
  D4                  179.77372                  
  D5                  179.92717                  
  D6                 -179.60842                  
  D7                 -179.67597                  
  D8                 -177.51326                  
  D9                 -174.13443                  
  D10                -179.79311                  
  D11                   0.28931                  
  D12                   0.05279                  
  D13                  -0.27089                  
  D14                 179.96892                  
  D15                 178.50739                  
  D16                -177.5523                   
  D17                  46.2688                   
  D18                 178.04984                  
  D19                  -0.44482                  
  D20                   0.37022                  
  D21                   0.12507                  
  D22                   2.86611                  
  D23                 179.98697                  
  D24                 179.94004                  
  D25                 179.77911                  
  D26                -179.99223                  
  D27                   0.37234                  
  D28                  -0.41785                  
  D29                   0.19881                  
  D30                -179.74824                  
  D31                 179.59513                  
  D32                 179.35835                  
  D33                  -0.0491                   
  D34                  61.20264                  
  D35                 -56.77367                  
  D36                  -2.8348                   
  D37                 179.64543                  
  D38                -179.87509                  
  D39                 179.54761                  
  D40                 179.28512                  
 

 GradGradGradGradGradGradGradGradGradGradGradGradGradGradGradGradGradGrad
 Berny optimization.
 Initialization pass.
                           ----------------------------
                           !    Initial Parameters    !
                           ! (Angstroms and Degrees)  !
 --------------------------                            --------------------------
 ! Name  Definition              Value          Derivative Info.                !
 --------------------------------------------------------------------------------
 ! R1    R(1,2)                  1.3825         estimate D2E/DX2                !
 ! R2    R(1,6)                  1.4129         estimate D2E/DX2                !
 ! R3    R(1,26)                 1.0854         estimate D2E/DX2                !
 ! R4    R(2,3)                  1.4069         estimate D2E/DX2                !
 ! R5    R(2,27)                 1.0849         estimate D2E/DX2                !
 ! R6    R(3,4)                  1.4            estimate D2E/DX2                !
 ! R7    R(3,7)                  1.3608         estimate D2E/DX2                !
 ! R8    R(4,5)                  1.394          estimate D2E/DX2                !
 ! R9    R(4,28)                 1.0831         estimate D2E/DX2                !
 ! R10   R(5,6)                  1.4043         estimate D2E/DX2                !
 ! R11   R(5,29)                 1.0867         estimate D2E/DX2                !
 ! R12   R(6,8)                  1.4571         estimate D2E/DX2                !
 ! R13   R(7,18)                 1.4307         estimate D2E/DX2                !
 ! R14   R(8,9)                  1.3495         estimate D2E/DX2                !
 ! R15   R(8,30)                 1.0892         estimate D2E/DX2                !
 ! R16   R(9,10)                 1.4819         estimate D2E/DX2                !
 ! R17   R(9,31)                 1.0839         estimate D2E/DX2                !
 ! R18   R(10,11)                1.4973         estimate D2E/DX2                !
 ! R19   R(10,25)                1.2326         estimate D2E/DX2                !
 ! R20   R(11,12)                1.4047         estimate D2E/DX2                !
 ! R21   R(11,16)                1.4058         estimate D2E/DX2                !
 ! R22   R(12,13)                1.3876         estimate D2E/DX2                !
 ! R23   R(12,32)                1.0845         estimate D2E/DX2                !
 ! R24   R(13,14)                1.4019         estimate D2E/DX2                !
 ! R25   R(13,33)                1.0882         estimate D2E/DX2                !
 ! R26   R(14,15)                1.3995         estimate D2E/DX2                !
 ! R27   R(14,17)                1.362          estimate D2E/DX2                !
 ! R28   R(15,16)                1.3897         estimate D2E/DX2                !
 ! R29   R(15,34)                1.0847         estimate D2E/DX2                !
 ! R30   R(16,35)                1.0842         estimate D2E/DX2                !
 ! R31   R(17,36)                0.9666         estimate D2E/DX2                !
 ! R32   R(18,19)                1.5086         estimate D2E/DX2                !
 ! R33   R(18,37)                1.0979         estimate D2E/DX2                !
 ! R34   R(18,38)                1.1002         estimate D2E/DX2                !
 ! R35   R(19,20)                1.4006         estimate D2E/DX2                !
 ! R36   R(19,24)                1.398          estimate D2E/DX2                !
 ! R37   R(20,21)                1.3936         estimate D2E/DX2                !
 ! R38   R(20,39)                1.0854         estimate D2E/DX2                !
 ! R39   R(21,22)                1.3971         estimate D2E/DX2                !
 ! R40   R(21,40)                1.0861         estimate D2E/DX2                !
 ! R41   R(22,23)                1.3945         estimate D2E/DX2                !
 ! R42   R(22,41)                1.086          estimate D2E/DX2                !
 ! R43   R(23,24)                1.3962         estimate D2E/DX2                !
 ! R44   R(23,42)                1.086          estimate D2E/DX2                !
 ! R45   R(24,43)                1.0872         estimate D2E/DX2                !
 ! A1    A(2,1,6)              121.3098         estimate D2E/DX2                !
 ! A2    A(2,1,26)             118.8012         estimate D2E/DX2                !
 ! A3    A(6,1,26)             119.889          estimate D2E/DX2                !
 ! A4    A(1,2,3)              120.3376         estimate D2E/DX2                !
 ! A5    A(1,2,27)             121.3529         estimate D2E/DX2                !
 ! A6    A(3,2,27)             118.3094         estimate D2E/DX2                !
 ! A7    A(2,3,4)              119.5359         estimate D2E/DX2                !
 ! A8    A(2,3,7)              115.5019         estimate D2E/DX2                !
 ! A9    A(4,3,7)              124.9616         estimate D2E/DX2                !
 ! A10   A(3,4,5)              119.3486         estimate D2E/DX2                !
 ! A11   A(3,4,28)             121.2006         estimate D2E/DX2                !
 ! A12   A(5,4,28)             119.4507         estimate D2E/DX2                !
 ! A13   A(4,5,6)              122.1404         estimate D2E/DX2                !
 ! A14   A(4,5,29)             118.9481         estimate D2E/DX2                !
 ! A15   A(6,5,29)             118.9115         estimate D2E/DX2                !
 ! A16   A(1,6,5)              117.3277         estimate D2E/DX2                !
 ! A17   A(1,6,8)              123.6942         estimate D2E/DX2                !
 ! A18   A(5,6,8)              118.9781         estimate D2E/DX2                !
 ! A19   A(3,7,18)             118.6522         estimate D2E/DX2                !
 ! A20   A(6,8,9)              128.26           estimate D2E/DX2                !
 ! A21   A(6,8,30)             116.1056         estimate D2E/DX2                !
 ! A22   A(9,8,30)             115.6344         estimate D2E/DX2                !
 ! A23   A(8,9,10)             119.9793         estimate D2E/DX2                !
 ! A24   A(8,9,31)             120.8963         estimate D2E/DX2                !
 ! A25   A(10,9,31)            119.1204         estimate D2E/DX2                !
 ! A26   A(9,10,11)            119.3258         estimate D2E/DX2                !
 ! A27   A(9,10,25)            120.9444         estimate D2E/DX2                !
 ! A28   A(11,10,25)           119.7288         estimate D2E/DX2                !
 ! A29   A(10,11,12)           117.4466         estimate D2E/DX2                !
 ! A30   A(10,11,16)           124.5161         estimate D2E/DX2                !
 ! A31   A(12,11,16)           118.0342         estimate D2E/DX2                !
 ! A32   A(11,12,13)           121.3079         estimate D2E/DX2                !
 ! A33   A(11,12,32)           117.7974         estimate D2E/DX2                !
 ! A34   A(13,12,32)           120.8947         estimate D2E/DX2                !
 ! A35   A(12,13,14)           119.7681         estimate D2E/DX2                !
 ! A36   A(12,13,33)           120.3098         estimate D2E/DX2                !
 ! A37   A(14,13,33)           119.9221         estimate D2E/DX2                !
 ! A38   A(13,14,15)           119.8864         estimate D2E/DX2                !
 ! A39   A(13,14,17)           122.6445         estimate D2E/DX2                !
 ! A40   A(15,14,17)           117.469          estimate D2E/DX2                !
 ! A41   A(14,15,16)           119.7208         estimate D2E/DX2                !
 ! A42   A(14,15,34)           118.9063         estimate D2E/DX2                !
 ! A43   A(16,15,34)           121.3727         estimate D2E/DX2                !
 ! A44   A(11,16,15)           121.2813         estimate D2E/DX2                !
 ! A45   A(11,16,35)           120.6654         estimate D2E/DX2                !
 ! A46   A(15,16,35)           118.0485         estimate D2E/DX2                !
 ! A47   A(14,17,36)           109.2015         estimate D2E/DX2                !
 ! A48   A(7,18,19)            108.846          estimate D2E/DX2                !
 ! A49   A(7,18,37)            110.1757         estimate D2E/DX2                !
 ! A50   A(7,18,38)            109.0683         estimate D2E/DX2                !
 ! A51   A(19,18,37)           110.4481         estimate D2E/DX2                !
 ! A52   A(19,18,38)           110.621          estimate D2E/DX2                !
 ! A53   A(37,18,38)           107.667          estimate D2E/DX2                !
 ! A54   A(18,19,20)           120.5968         estimate D2E/DX2                !
 ! A55   A(18,19,24)           120.2421         estimate D2E/DX2                !
 ! A56   A(20,19,24)           119.1316         estimate D2E/DX2                !
 ! A57   A(19,20,21)           120.3525         estimate D2E/DX2                !
 ! A58   A(19,20,39)           119.3522         estimate D2E/DX2                !
 ! A59   A(21,20,39)           120.2894         estimate D2E/DX2                !
 ! A60   A(20,21,22)           120.2181         estimate D2E/DX2                !
 ! A61   A(20,21,40)           119.7571         estimate D2E/DX2                !
 ! A62   A(22,21,40)           120.0248         estimate D2E/DX2                !
 ! A63   A(21,22,23)           119.7225         estimate D2E/DX2                !
 ! A64   A(21,22,41)           120.1298         estimate D2E/DX2                !
 ! A65   A(23,22,41)           120.1473         estimate D2E/DX2                !
 ! A66   A(22,23,24)           120.0076         estimate D2E/DX2                !
 ! A67   A(22,23,42)           120.1903         estimate D2E/DX2                !
 ! A68   A(24,23,42)           119.7996         estimate D2E/DX2                !
 ! A69   A(19,24,23)           120.5645         estimate D2E/DX2                !
 ! A70   A(19,24,43)           119.6574         estimate D2E/DX2                !
 ! A71   A(23,24,43)           119.7779         estimate D2E/DX2                !
 ! D1    D(6,1,2,3)              0.004          estimate D2E/DX2                !
 ! D2    D(6,1,2,27)           179.94           estimate D2E/DX2                !
 ! D3    D(26,1,2,3)           179.987          estimate D2E/DX2                !
 ! D4    D(26,1,2,27)           -0.077          estimate D2E/DX2                !
 ! D5    D(2,1,6,5)             -0.009          estimate D2E/DX2                !
 ! D6    D(2,1,6,8)           -179.9653         estimate D2E/DX2                !
 ! D7    D(26,1,6,5)          -179.9918         estimate D2E/DX2                !
 ! D8    D(26,1,6,8)             0.0519         estimate D2E/DX2                !
 ! D9    D(1,2,3,4)              0.0404         estimate D2E/DX2                !
 ! D10   D(1,2,3,7)            179.7737         estimate D2E/DX2                !
 ! D11   D(27,2,3,4)          -179.8975         estimate D2E/DX2                !
 ! D12   D(27,2,3,7)            -0.1642         estimate D2E/DX2                !
 ! D13   D(2,3,4,5)             -0.0789         estimate D2E/DX2                !
 ! D14   D(2,3,4,28)           179.7791         estimate D2E/DX2                !
 ! D15   D(7,3,4,5)           -179.7852         estimate D2E/DX2                !
 ! D16   D(7,3,4,28)             0.0728         estimate D2E/DX2                !
 ! D17   D(2,3,7,18)           178.5074         estimate D2E/DX2                !
 ! D18   D(4,3,7,18)            -1.7757         estimate D2E/DX2                !
 ! D19   D(3,4,5,6)              0.0756         estimate D2E/DX2                !
 ! D20   D(3,4,5,29)          -179.9922         estimate D2E/DX2                !
 ! D21   D(28,4,5,6)          -179.7849         estimate D2E/DX2                !
 ! D22   D(28,4,5,29)            0.1473         estimate D2E/DX2                !
 ! D23   D(4,5,6,1)             -0.0312         estimate D2E/DX2                !
 ! D24   D(4,5,6,8)            179.9272         estimate D2E/DX2                !
 ! D25   D(29,5,6,1)          -179.9634         estimate D2E/DX2                !
 ! D26   D(29,5,6,8)            -0.005          estimate D2E/DX2                !
 ! D27   D(1,6,8,9)              0.3472         estimate D2E/DX2                !
 ! D28   D(1,6,8,30)          -179.6721         estimate D2E/DX2                !
 ! D29   D(5,6,8,9)           -179.6084         estimate D2E/DX2                !
 ! D30   D(5,6,8,30)             0.3723         estimate D2E/DX2                !
 ! D31   D(3,7,18,19)         -177.5523         estimate D2E/DX2                !
 ! D32   D(3,7,18,37)           61.2026         estimate D2E/DX2                !
 ! D33   D(3,7,18,38)          -56.7737         estimate D2E/DX2                !
 ! D34   D(6,8,9,10)          -179.676          estimate D2E/DX2                !
 ! D35   D(6,8,9,31)            -0.4178         estimate D2E/DX2                !
 ! D36   D(30,8,9,10)            0.3432         estimate D2E/DX2                !
 ! D37   D(30,8,9,31)          179.6013         estimate D2E/DX2                !
 ! D38   D(8,9,10,11)         -177.5133         estimate D2E/DX2                !
 ! D39   D(8,9,10,25)            2.8661         estimate D2E/DX2                !
 ! D40   D(31,9,10,11)           3.2155         estimate D2E/DX2                !
 ! D41   D(31,9,10,25)        -176.4052         estimate D2E/DX2                !
 ! D42   D(9,10,11,12)        -174.1344         estimate D2E/DX2                !
 ! D43   D(9,10,11,16)           6.5167         estimate D2E/DX2                !
 ! D44   D(25,10,11,12)          5.4909         estimate D2E/DX2                !
 ! D45   D(25,10,11,16)       -173.858          estimate D2E/DX2                !
 ! D46   D(10,11,12,13)       -179.7931         estimate D2E/DX2                !
 ! D47   D(10,11,12,32)          0.1988         estimate D2E/DX2                !
 ! D48   D(16,11,12,13)         -0.4009         estimate D2E/DX2                !
 ! D49   D(16,11,12,32)        179.591          estimate D2E/DX2                !
 ! D50   D(10,11,16,15)        179.5231         estimate D2E/DX2                !
 ! D51   D(10,11,16,35)          0.3389         estimate D2E/DX2                !
 ! D52   D(12,11,16,15)          0.1777         estimate D2E/DX2                !
 ! D53   D(12,11,16,35)       -179.0065         estimate D2E/DX2                !
 ! D54   D(11,12,13,14)          0.2893         estimate D2E/DX2                !
 ! D55   D(11,12,13,33)       -179.7482         estimate D2E/DX2                !
 ! D56   D(32,12,13,14)       -179.7024         estimate D2E/DX2                !
 ! D57   D(32,12,13,33)          0.2601         estimate D2E/DX2                !
 ! D58   D(12,13,14,15)          0.0528         estimate D2E/DX2                !
 ! D59   D(12,13,14,17)        179.9689         estimate D2E/DX2                !
 ! D60   D(33,13,14,15)       -179.9098         estimate D2E/DX2                !
 ! D61   D(33,13,14,17)          0.0063         estimate D2E/DX2                !
 ! D62   D(13,14,15,16)         -0.2709         estimate D2E/DX2                !
 ! D63   D(13,14,15,34)        179.5951         estimate D2E/DX2                !
 ! D64   D(17,14,15,16)        179.8087         estimate D2E/DX2                !
 ! D65   D(17,14,15,34)         -0.3253         estimate D2E/DX2                !
 ! D66   D(13,14,17,36)         -0.0491         estimate D2E/DX2                !
 ! D67   D(15,14,17,36)        179.8689         estimate D2E/DX2                !
 ! D68   D(14,15,16,11)          0.1534         estimate D2E/DX2                !
 ! D69   D(14,15,16,35)        179.3584         estimate D2E/DX2                !
 ! D70   D(34,15,16,11)       -179.7092         estimate D2E/DX2                !
 ! D71   D(34,15,16,35)         -0.5043         estimate D2E/DX2                !
 ! D72   D(7,18,19,20)          46.2688         estimate D2E/DX2                !
 ! D73   D(7,18,19,24)        -135.7257         estimate D2E/DX2                !
 ! D74   D(37,18,19,20)        167.3471         estimate D2E/DX2                !
 ! D75   D(37,18,19,24)        -14.6474         estimate D2E/DX2                !
 ! D76   D(38,18,19,20)        -73.5508         estimate D2E/DX2                !
 ! D77   D(38,18,19,24)        104.4547         estimate D2E/DX2                !
 ! D78   D(18,19,20,21)        178.0498         estimate D2E/DX2                !
 ! D79   D(18,19,20,39)         -2.8348         estimate D2E/DX2                !
 ! D80   D(24,19,20,21)          0.0224         estimate D2E/DX2                !
 ! D81   D(24,19,20,39)        179.1378         estimate D2E/DX2                !
 ! D82   D(18,19,24,23)       -177.5595         estimate D2E/DX2                !
 ! D83   D(18,19,24,43)          2.6042         estimate D2E/DX2                !
 ! D84   D(20,19,24,23)          0.4751         estimate D2E/DX2                !
 ! D85   D(20,19,24,43)       -179.3613         estimate D2E/DX2                !
 ! D86   D(19,20,21,22)         -0.4448         estimate D2E/DX2                !
 ! D87   D(19,20,21,40)        179.6454         estimate D2E/DX2                !
 ! D88   D(39,20,21,22)       -179.5518         estimate D2E/DX2                !
 ! D89   D(39,20,21,40)          0.5384         estimate D2E/DX2                !
 ! D90   D(20,21,22,23)          0.3702         estimate D2E/DX2                !
 ! D91   D(20,21,22,41)       -179.8751         estimate D2E/DX2                !
 ! D92   D(40,21,22,23)       -179.7203         estimate D2E/DX2                !
 ! D93   D(40,21,22,41)          0.0344         estimate D2E/DX2                !
 ! D94   D(21,22,23,24)          0.1251         estimate D2E/DX2                !
 ! D95   D(21,22,23,42)        179.5476         estimate D2E/DX2                !
 ! D96   D(41,22,23,24)       -179.6296         estimate D2E/DX2                !
 ! D97   D(41,22,23,42)         -0.207          estimate D2E/DX2                !
 ! D98   D(22,23,24,19)         -0.551          estimate D2E/DX2                !
 ! D99   D(22,23,24,43)        179.2851         estimate D2E/DX2                !
 ! D100  D(42,23,24,19)       -179.9759         estimate D2E/DX2                !
 ! D101  D(42,23,24,43)         -0.1397         estimate D2E/DX2                !
 --------------------------------------------------------------------------------
 Trust Radius=3.00D-01 FncErr=1.00D-07 GrdErr=1.00D-06
 Number of steps in this run= 227 maximum allowed number of steps= 258.
 GradGradGradGradGradGradGradGradGradGradGradGradGradGradGradGradGradGrad

                          Input orientation:                          
 ---------------------------------------------------------------------
 Center     Atomic      Atomic             Coordinates (Angstroms)
 Number     Number       Type             X           Y           Z
 ---------------------------------------------------------------------
      1          6           0        0.000000    0.000000    0.000000
      2          6           0        0.000000    0.000000    1.382471
      3          6           0        1.214288    0.000000    2.093114
      4          6           0        2.425204    0.000859    1.390422
      5          6           0        2.406279    0.000027   -0.003404
      6          6           0        1.207180   -0.000085   -0.734260
      7          8           0        1.099582    0.004851    3.449038
      8          6           0        1.267801    0.000645   -2.190127
      9          6           0        0.243833    0.007915   -3.069164
     10          6           0        0.518015    0.000011   -4.525431
     11          6           0       -0.627324    0.064859   -5.487656
     12          6           0       -0.333273   -0.072071   -6.854374
     13          6           0       -1.332586   -0.020239   -7.815626
     14          6           0       -2.664258    0.178326   -7.425203
     15          6           0       -2.979091    0.324291   -6.069439
     16          6           0       -1.968516    0.265681   -5.117248
     17          8           0       -3.690529    0.239449   -8.318629
     18          6           0        2.292302   -0.027541    4.238517
     19          6           0        1.910095   -0.076083    5.697042
     20          6           0        0.919449   -0.958887    6.145427
     21          6           0        0.598770   -1.028379    7.499798
     22          6           0        1.270261   -0.223578    8.423595
     23          6           0        2.258676    0.656474    7.984096
     24          6           0        2.571909    0.732677    6.625647
     25          8           0        1.672277   -0.066041   -4.952692
     26          1           0       -0.951124   -0.000216   -0.522912
     27          1           0       -0.926484    0.001035    1.946956
     28          1           0        3.375471    0.004453    1.910094
     29          1           0        3.349937    0.000573   -0.542227
     30          1           0        2.264924   -0.005110   -2.628286
     31          1           0       -0.784352    0.007488   -2.725971
     32          1           0        0.703394   -0.220056   -7.136291
     33          1           0       -1.086933   -0.132342   -8.869814
     34          1           0       -4.013760    0.483819   -5.785672
     35          1           0       -2.241454    0.392723   -4.075667
     36          1           0       -3.340788    0.127180   -9.212704
     37          1           0        2.907018    0.858439    4.032382
     38          1           0        2.881894   -0.914521    3.962741
     39          1           0        0.393498   -1.578330    5.425816
     40          1           0       -0.175087   -1.712276    7.836153
     41          1           0        1.020600   -0.280365    9.479006
     42          1           0        2.780312    1.290854    8.694672
     43          1           0        3.335006    1.428478    6.285687
 ---------------------------------------------------------------------
                    Distance matrix (angstroms):
                    1          2          3          4          5
     1  C    0.000000
     2  C    1.382471   0.000000
     3  C    2.419839   1.406950   0.000000
     4  C    2.795512   2.425217   1.400034   0.000000
     5  C    2.406281   2.776838   2.411686   1.393955   0.000000
     6  C    1.412948   2.436767   2.827383   2.449052   1.404275
     7  O    3.620078   2.340897   1.360776   2.448508   3.691455
     8  C    2.530608   3.790881   4.283575   3.762966   2.465337
     9  C    3.078845   4.458315   5.252710   4.964508   3.751682
    10  C    4.554983   5.930569   6.655068   6.215681   4.900435
    11  C    5.523777   6.899014   7.801526   7.525289   6.267692
    12  C    6.862850   8.243900   9.080621   8.694319   7.378762
    13  C    7.928443   9.294148  10.230841   9.943478   8.660850
    14  C    7.890736   9.203543  10.279751  10.180833   8.990285
    15  C    6.768917   8.031881   9.182421   9.217404   8.118136
    16  C    5.489251   6.796470   7.886073   7.856506   6.735043
    17  O    9.103676  10.382133  11.511687  11.477142  10.313648
    18  C    4.818759   3.662295   2.401172   2.851336   4.243542
    19  C    6.009204   4.719086   3.671271   4.337999   5.722506
    20  C    6.287379   4.944755   4.174643   5.079221   6.398305
    21  C    7.593620   6.231996   5.537929   6.459076   7.786061
    22  C    8.521767   7.158280   6.334676   7.130904   8.506166
    23  C    8.323363   7.008140   6.018752   6.628281   8.015789
    24  C    7.144979   5.885781   4.787881   5.288162   6.671471
    25  O    5.227813   6.552493   7.060984   6.387994   5.003856
    26  H    1.085391   2.129582   3.395968   3.880778   3.397358
    27  H    2.156157   1.084904   2.145756   3.397579   3.861504
    28  H    3.878439   3.416462   2.168924   1.083088   2.144954
    29  H    3.393536   3.863488   3.392052   2.142490   1.086655
    30  H    3.469552   4.606092   4.836887   4.021907   2.628690
    31  H    2.836579   4.182650   5.217106   5.219768   4.194347
    32  H    7.174248   8.550585   9.246153   8.701624   7.336642
    33  H    8.937144  10.310591  11.202630  10.845519   9.530649
    34  H    7.058212   8.229619   9.467937   9.653488   8.653645
    35  H    4.667913   5.913512   7.081684   7.197874   6.191846
    36  H    9.800559  11.110121  12.189603  12.070166  10.856157
    37  H    5.044579   4.026127   2.713487   2.819138   4.156342
    38  H    4.984474   3.974853   2.666977   2.768269   4.097916
    39  H    5.664402   4.358280   3.777794   4.786029   6.001577
    40  H    8.022957   6.679262   6.151808   7.158477   8.429359
    41  H    9.537913   8.165421   7.393749   8.214450   9.587222
    42  H    9.219206   7.928727   6.906468   7.425783   8.801288
    43  H    7.257594   6.099536   4.910770   5.179716   6.515802
                    6          7          8          9         10
     6  C    0.000000
     7  O    4.184684   0.000000
     8  C    1.457129   5.641674   0.000000
     9  C    2.525842   6.574136   1.349544   0.000000
    10  C    3.853301   7.995649   2.452718   1.481875   0.000000
    11  C    5.095527   9.102214   3.803856   2.571237   1.497292
    12  C    6.311416  10.402850   4.931930   3.829787   2.480698
    13  C    7.523069  11.524267   6.197475   5.001479   3.774986
    14  C    7.732308  11.508505   6.549708   5.240335   4.308983
    15  C    6.789272  10.360454   5.761067   4.414632   3.836518
    16  C    5.419065   9.102885   4.371731   3.025819   2.569760
    17  O    9.031477  12.707406   7.886735   6.564274   5.670760
    18  C    5.089868   1.430702   6.509828   7.589446   8.941792
    19  C    6.470047   2.391026   7.913650   8.923556  10.317104
    20  C    6.952135   2.869104   8.397828   9.289772  10.721374
    21  C    8.320292   4.210348   9.767350  10.625575  12.069393
    22  C    9.160799   4.982723  10.616090  11.540826  12.972785
    23  C    8.806046   4.725978  10.243376  11.254101  12.647099
    24  C    7.521147   3.576077   8.941724   9.996728  11.362298
    25  O    4.244506   8.421524   2.792815   2.365080   1.232573
    26  H    2.168627   4.470101   2.775470   2.812719   4.263629
    27  H    3.426579   2.522143   4.682984   5.150839   6.631619
    28  H    3.419666   2.747367   4.610217   5.882192   7.041382
    29  H    2.151345   4.581955   2.655346   4.004166   4.887300
    30  H    2.169374   6.188052   1.089161   2.068660   2.578929
    31  H    2.816588   6.456000   2.120968   1.083949   2.221323
    32  H    6.425588  10.595127   4.983152   4.099352   2.626668
    33  H    8.453856  12.512145   7.083832   5.952995   4.633254
    34  H    7.280738  10.566719   6.407518   5.072770   4.728558
    35  H    4.817922   8.242217   4.002981   2.708833   2.823328
    36  H    9.622070  13.418329   8.400696   7.113847   6.072649
    37  H    5.132971   2.082242   6.491722   7.632031   8.926388
    38  H    5.069781   2.070211   6.426555   7.566898   8.858519
    39  H    6.410887   2.629195   7.826886   8.643105  10.076407
    40  H    8.848403   4.880582  10.273378  11.048098  12.498843
    41  H   10.218814   6.037227  11.675133  12.575494  14.016257
    42  H    9.646036   5.656442  11.064862  12.102375  13.474249
    43  H    7.473158   3.882064   8.840332   9.954225  11.263047
                   11         12         13         14         15
    11  C    0.000000
    12  C    1.404683   0.000000
    13  C    2.433944   1.387559   0.000000
    14  C    2.813550   2.412890   1.401858   0.000000
    15  C    2.436510   2.788114   2.424633   1.399472   0.000000
    16  C    1.405819   2.409503   2.787005   2.412124   1.389735
    17  O    4.174699   3.675902   2.424942   1.362049   2.360550
    18  C   10.155353  11.399468  12.587384  12.674867  11.582976
    19  C   11.469779  12.750324  13.896413  13.899020  12.748118
    20  C   11.780033  13.090095  14.172640  14.081840  12.885966
    21  C   13.090929  14.416154  15.469606  15.325115  14.098049
    22  C   14.043038  15.362637  16.447750  16.334821  15.113080
    23  C   13.790109  15.080755  16.216853  16.183646  15.001546
    24  C   12.546441  13.812989  14.978729  15.005037  13.861659
    25  O    2.364633   2.763813   4.150626   4.997856   4.799449
    26  H    4.975718   6.361943   7.302712   7.113953   5.914552
    27  H    7.440902   8.821602   9.771048   9.533554   8.281321
    28  H    8.411463   9.517171  10.805371  11.120087  10.205670
    29  H    6.346653   7.308523   8.650364   9.142073   8.409010
    30  H    4.067676   4.961344   6.312750   6.880472   6.280902
    31  H    2.766741   4.153735   5.119172   5.064190   4.011985
    32  H    2.137752   1.084461   2.155607   3.403419   3.872361
    33  H    3.418936   2.152588   1.088221   2.161335   3.410407
    34  H    3.425243   3.872612   3.400511   2.145354   1.084672
    35  H    2.169475   3.402705   3.870901   3.382916   2.126950
    36  H    4.608987   3.827084   2.450803   1.911928   3.170141
    37  H   10.185895  11.396789  12.614342  12.758445  11.703776
    38  H   10.128366  11.316227  12.541592  12.713748  11.684624
    39  H   11.083592  12.393550  13.444062  13.326080  12.129930
    40  H   13.449409  14.782654  15.785467  15.578168  14.330929
    41  H   15.061069  16.390719  17.455929  17.307249  16.066029
    42  H   14.637399  15.916181  17.065311  17.050848  15.877151
    43  H   12.496844  13.724763  14.924216  15.018074  13.918915
                   16         17         18         19         20
    16  C    0.000000
    17  O    3.635224   0.000000
    18  C   10.284498  13.912134   0.000000
    19  C   11.493881  15.096542   1.508553   0.000000
    20  C   11.691355  15.228159   2.527535   1.400633   0.000000
    21  C   12.940456  16.438616   3.808632   2.424122   1.393551
    22  C   13.931385  17.467853   4.312525   2.804503   2.419462
    23  C   13.771968  17.359314   3.807672   2.426678   2.789915
    24  C   12.598775  16.210884   2.520813   1.397998   2.413011
    25  O    3.659576   6.338970   9.212179  10.652394  11.159399
    26  H    4.713143   8.266498   5.761229   6.846908   6.991769
    27  H    7.145548  10.633861   3.951285   4.702688   4.685732
    28  H    8.832326  12.434241   2.568236   4.061378   4.989802
    29  H    7.020473  10.492742   4.896417   6.403709   7.180011
    30  H    4.918361   8.240584   6.866895   8.333188   8.927376
    31  H    2.680880   6.306940   7.613877   8.843878   9.085071
    32  H    3.384018   4.573361  11.486860  12.890744  13.304006
    33  H    3.875224   2.687144  13.537303  14.872076  15.171230
    34  H    2.162729   2.565163  11.853788  12.932837  12.991116
    35  H    1.084217   4.486205   9.479305  10.628310  10.783735
    36  H    4.321466   0.966589  14.583930  15.808657  15.975023
    37  H   10.384504  14.016356   1.097875   2.153667   3.423166
    38  H   10.361736  13.977140   1.100184   2.157585   2.935520
    39  H   10.960643  14.453144   2.723982   2.151830   1.085437
    40  H   13.225706  16.647658   4.676464   3.406010   2.150385
    41  H   14.909179  18.417946   5.398506   3.890525   3.403435
    42  H   14.641430  18.232653   4.672647   3.407577   3.875925
    43  H   12.629584  16.249861   2.719950   2.154200   3.399132
                   21         22         23         24         25
    21  C    0.000000
    22  C    1.397142   0.000000
    23  C    2.414241   1.394495   0.000000
    24  C    2.785450   2.416884   1.396175   0.000000
    25  O   12.535670  13.383254  12.970211  11.640671   0.000000
    26  H    8.235482   9.220869   9.116098   8.003173   5.148740
    27  H    5.849799   6.842733   6.857253   5.887631   7.373141
    28  H    6.326263   6.849059   6.210143   4.838643   7.071327
    29  H    8.561648   9.206588   8.620861   7.247049   4.719235
    30  H   10.315097  11.098701  10.632986   9.288371   2.399543
    31  H   10.370747  11.339649  11.152880   9.962085   3.316432
    32  H   14.658766  15.570209  15.225417  13.920847   2.393859
    33  H   16.480554  17.453558  17.200861  15.945052   4.791814
    34  H   14.144465  15.176448  15.132078  14.052537   5.772973
    35  H   12.003241  12.997828  12.874728  11.738916   4.036946
    36  H   17.209392  18.232495  18.093206  16.916855   6.581479
    37  H    4.572862   4.809625   4.009636   2.617850   9.116512
    38  H    4.211460   4.793119   4.362078   3.146494   9.037037
    39  H    2.155455   3.404519   3.875311   3.394970  10.565781
    40  H    1.086142   2.156465   3.399422   3.871577  13.026027
    41  H    2.157482   1.086024   2.155285   3.402127  14.447994
    42  H    3.400836   2.155746   1.086029   2.153104  13.759340
    43  H    3.872621   3.400458   2.153850   1.087212  11.458596
                   26         27         28         29         30
    26  H    0.000000
    27  H    2.469991   0.000000
    28  H    4.963765   4.302115   0.000000
    29  H    4.301104   4.948111   2.452456   0.000000
    30  H    3.843903   5.578348   4.672290   2.351367   0.000000
    31  H    2.209376   4.675092   6.228742   4.675588   3.050866
    32  H    6.820744   9.230967   9.435437   7.108765   4.775634
    33  H    8.349053  10.818782  11.667827   9.436747   7.085747
    34  H    6.108247   8.340137  10.679670   9.052694   7.044857
    35  H    3.800188   6.176937   8.217660   6.625906   4.749803
    36  H    9.013280  11.418528  12.993839  10.952580   8.648472
    37  H    6.031024   4.447458   2.335134   4.675378   6.747036
    38  H    5.970683   4.405154   2.302497   4.620735   6.682014
    39  H    6.299668   4.042180   4.874184   6.844779   8.416995
    40  H    8.567808   6.179213   7.118413   9.249696  10.879915
    41  H   10.198261   7.784735   7.931896  10.292222  12.174179
    42  H   10.027678   7.806128   6.931057   9.343960  11.408528
    43  H    8.171236   6.246798   4.601663   6.975639   9.091709
                   31         32         33         34         35
    31  H    0.000000
    32  H    4.660052   0.000000
    33  H    6.152879   2.493606   0.000000
    34  H    4.474119   4.956930   4.296265   0.000000
    35  H    2.023174   4.291276   4.959078   2.464444   0.000000
    36  H    6.973335   4.559329   2.294512   3.510645   5.260057
    37  H    7.747623  11.434962  13.542524  12.017974   9.615826
    38  H    7.683120  11.332107  13.455031  12.022353   9.621517
    39  H    8.387716  12.639125  14.444639  12.221860  10.055158
    40  H   10.718547  15.072243  16.805266  14.321744  12.271607
    41  H   12.341076  16.618434  18.470051  16.091587  13.957908
    42  H   12.032661  16.037949  18.041403  16.015339  13.751594
    43  H   10.009910  13.776521  15.864392  14.163843  11.812170
                   36         37         38         39         40
    36  H    0.000000
    37  H   14.662951   0.000000
    38  H   14.608192   1.774506   0.000000
    39  H   15.203287   3.767929   2.961983   0.000000
    40  H   17.437568   5.529613   4.998486   2.480112   0.000000
    41  H   19.198121   5.875471   5.856258   4.301897   2.485761
    42  H   18.960383   4.684014   5.221606   4.961302   4.300026
    43  H   16.925121   2.363367   3.330321   4.293337   4.958733
                   41         42         43
    41  H    0.000000
    42  H    2.486060   0.000000
    43  H    4.298128   2.475850   0.000000
 Stoichiometry    C22H18O3
 Framework group  C1[X(C22H18O3)]
 Deg. of freedom   123
 Full point group                 C1      NOp   1
 Largest Abelian subgroup         C1      NOp   1
 Largest concise Abelian subgroup C1      NOp   1
                         Standard orientation:                         
 ---------------------------------------------------------------------
 Center     Atomic      Atomic             Coordinates (Angstroms)
 Number     Number       Type             X           Y           Z
 ---------------------------------------------------------------------
      1          6           0       -0.223826   -0.465535   -0.026485
      2          6           0       -1.565293   -0.797667   -0.063655
      3          6           0       -2.547840    0.208690   -0.026845
      4          6           0       -2.158146    1.551369    0.046952
      5          6           0       -0.801107    1.867841    0.084386
      6          6           0        0.197387    0.881058    0.048931
      7          8           0       -3.835798   -0.228008   -0.073427
      8          6           0        1.595457    1.289624    0.090137
      9          6           0        2.695593    0.508584    0.059359
     10          6           0        4.042394    1.123823    0.119032
     11          6           0        5.253398    0.248062    0.027405
     12          6           0        6.506577    0.854445    0.214428
     13          6           0        7.681209    0.119336    0.142497
     14          6           0        7.626649   -1.255173   -0.127605
     15          6           0        6.389249   -1.878607   -0.324312
     16          6           0        5.220591   -1.130752   -0.244851
     17          8           0        8.742110   -2.032233   -0.211879
     18          6           0       -4.890126    0.736844   -0.007384
     19          6           0       -6.213900    0.013460   -0.015726
     20          6           0       -6.423206   -1.099731    0.808148
     21          6           0       -7.661075   -1.739522    0.826359
     22          6           0       -8.707417   -1.269360    0.028787
     23          6           0       -8.506237   -0.160607   -0.792681
     24          6           0       -7.262513    0.473289   -0.817827
     25          8           0        4.177492    2.341989    0.249630
     26          1           0        0.513059   -1.261903   -0.056008
     27          1           0       -1.889478   -1.831328   -0.122529
     28          1           0       -2.891630    2.347858    0.073150
     29          1           0       -0.505943    2.912065    0.141783
     30          1           0        1.779949    2.361169    0.153581
     31          1           0        2.610652   -0.570572    0.003211
     32          1           0        6.527786    1.919508    0.417519
     33          1           0        8.643177    0.604990    0.294096
     34          1           0        6.365936   -2.941587   -0.538888
     35          1           0        4.277663   -1.639062   -0.412285
     36          1           0        9.523598   -1.484155   -0.059626
     37          1           0       -4.825133    1.427586   -0.858255
     38          1           0       -4.778090    1.329240    0.912899
     39          1           0       -5.607329   -1.468382    1.421838
     40          1           0       -7.810996   -2.605473    1.464605
     41          1           0       -9.672138   -1.767835    0.045620
     42          1           0       -9.312081    0.206796   -1.421242
     43          1           0       -7.106319    1.330285   -1.468358
 ---------------------------------------------------------------------
 Rotational constants (GHZ):      0.9058825      0.0487988      0.0467125
 Standard basis: 6-31G(d,p) (6D, 7F)
 There are   465 symmetry adapted basis functions of A   symmetry.
 Integral buffers will be    262144 words long.
 Raffenetti 2 integral format.
 Two-electron integral symmetry is turned on.
   465 basis functions,   826 primitive gaussians,   465 cartesian basis functions
    87 alpha electrons       87 beta electrons
       nuclear repulsion energy      1771.9597413826 Hartrees.
 NAtoms=   43 NActive=   43 NUniq=   43 SFac= 7.50D-01 NAtFMM=   80 NAOKFM=F Big=F
 One-electron integrals computed using PRISM.
 NBasis=   465 RedAO= T  NBF=   465
 NBsUse=   465 1.00D-06 NBFU=   465
 Harris functional with IExCor=  402 diagonalized for initial guess.
 ExpMin= 1.61D-01 ExpMax= 5.48D+03 ExpMxC= 8.25D+02 IAcc=1 IRadAn=         1 AccDes= 0.00D+00
 HarFok:  IExCor=  402 AccDes= 0.00D+00 IRadAn=         1 IDoV= 1
 ScaDFX=  1.000000  1.000000  1.000000  1.000000
 FoFCou: FMM=F IPFlag=           0 FMFlag=      100000 FMFlg1=           0
         NFxFlg=           0 DoJE=T BraDBF=F KetDBF=T FulRan=T
         Omega=  0.000000  0.000000  1.000000  0.000000  0.000000 ICntrl=     500 IOpCl=  0
         NMat0=    1 NMatS0=    1 NMatT0=    0 NMatD0=    1 NMtDS0=    0 NMtDT0=    0
         I1Cent=           4 NGrid=           0.
 Petite list used in FoFCou.
 Initial guess orbital symmetries:
       Occupied  (A) (A) (A) (A) (A) (A) (A) (A) (A) (A) (A) (A)
                 (A) (A) (A) (A) (A) (A) (A) (A) (A) (A) (A) (A)
                 (A) (A) (A) (A) (A) (A) (A) (A) (A) (A) (A) (A)
                 (A) (A) (A) (A) (A) (A) (A) (A) (A) (A) (A) (A)
                 (A) (A) (A) (A) (A) (A) (A) (A) (A) (A) (A) (A)
                 (A) (A) (A) (A) (A) (A) (A) (A) (A) (A) (A) (A)
                 (A) (A) (A) (A) (A) (A) (A) (A) (A) (A) (A) (A)
                 (A) (A) (A)
       Virtual   (A) (A) (A) (A) (A) (A) (A) (A) (A) (A) (A) (A)
                 (A) (A) (A) (A) (A) (A) (A) (A) (A) (A) (A) (A)
                 (A) (A) (A) (A) (A) (A) (A) (A) (A) (A) (A) (A)
                 (A) (A) (A) (A) (A) (A) (A) (A) (A) (A) (A) (A)
                 (A) (A) (A) (A) (A) (A) (A) (A) (A) (A) (A) (A)
                 (A) (A) (A) (A) (A) (A) (A) (A) (A) (A) (A) (A)
                 (A) (A) (A) (A) (A) (A) (A) (A) (A) (A) (A) (A)
                 (A) (A) (A) (A) (A) (A) (A) (A) (A) (A) (A) (A)
                 (A) (A) (A) (A) (A) (A) (A) (A) (A) (A) (A) (A)
                 (A) (A) (A) (A) (A) (A) (A) (A) (A) (A) (A) (A)
                 (A) (A) (A) (A) (A) (A) (A) (A) (A) (A) (A) (A)
                 (A) (A) (A) (A) (A) (A) (A) (A) (A) (A) (A) (A)
                 (A) (A) (A) (A) (A) (A) (A) (A) (A) (A) (A) (A)
                 (A) (A) (A) (A) (A) (A) (A) (A) (A) (A) (A) (A)
                 (A) (A) (A) (A) (A) (A) (A) (A) (A) (A) (A) (A)
                 (A) (A) (A) (A) (A) (A) (A) (A) (A) (A) (A) (A)
                 (A) (A) (A) (A) (A) (A) (A) (A) (A) (A) (A) (A)
                 (A) (A) (A) (A) (A) (A) (A) (A) (A) (A) (A) (A)
                 (A) (A) (A) (A) (A) (A) (A) (A) (A) (A) (A) (A)
                 (A) (A) (A) (A) (A) (A) (A) (A) (A) (A) (A) (A)
                 (A) (A) (A) (A) (A) (A) (A) (A) (A) (A) (A) (A)
                 (A) (A) (A) (A) (A) (A) (A) (A) (A) (A) (A) (A)
                 (A) (A) (A) (A) (A) (A) (A) (A) (A) (A) (A) (A)
                 (A) (A) (A) (A) (A) (A) (A) (A) (A) (A) (A) (A)
                 (A) (A) (A) (A) (A) (A) (A) (A) (A) (A) (A) (A)
                 (A) (A) (A) (A) (A) (A) (A) (A) (A) (A) (A) (A)
                 (A) (A) (A) (A) (A) (A) (A) (A) (A) (A) (A) (A)
                 (A) (A) (A) (A) (A) (A) (A) (A) (A) (A) (A) (A)
                 (A) (A) (A) (A) (A) (A) (A) (A) (A) (A) (A) (A)
                 (A) (A) (A) (A) (A) (A) (A) (A) (A) (A) (A) (A)
                 (A) (A) (A) (A) (A) (A) (A) (A) (A) (A) (A) (A)
                 (A) (A) (A) (A) (A) (A)
 The electronic state of the initial guess is 1-A.
 Requested convergence on RMS density matrix=1.00D-08 within 128 cycles.
 Requested convergence on MAX density matrix=1.00D-06.
 Requested convergence on             energy=1.00D-06.
 No special actions if energy rises.
 Integral accuracy reduced to 1.0D-05 until final iterations.
 Initial convergence to 1.0D-05 achieved.  Increase integral accuracy.
 SCF Done:  E(RB3LYP) =  -1074.86483212     A.U. after   15 cycles
             Convg  =    0.9437D-08             -V/T =  2.0095

 **********************************************************************

            Population analysis using the SCF density.

 **********************************************************************

 Orbital symmetries:
       Occupied  (A) (A) (A) (A) (A) (A) (A) (A) (A) (A) (A) (A)
                 (A) (A) (A) (A) (A) (A) (A) (A) (A) (A) (A) (A)
                 (A) (A) (A) (A) (A) (A) (A) (A) (A) (A) (A) (A)
                 (A) (A) (A) (A) (A) (A) (A) (A) (A) (A) (A) (A)
                 (A) (A) (A) (A) (A) (A) (A) (A) (A) (A) (A) (A)
                 (A) (A) (A) (A) (A) (A) (A) (A) (A) (A) (A) (A)
                 (A) (A) (A) (A) (A) (A) (A) (A) (A) (A) (A) (A)
                 (A) (A) (A)
       Virtual   (A) (A) (A) (A) (A) (A) (A) (A) (A) (A) (A) (A)
                 (A) (A) (A) (A) (A) (A) (A) (A) (A) (A) (A) (A)
                 (A) (A) (A) (A) (A) (A) (A) (A) (A) (A) (A) (A)
                 (A) (A) (A) (A) (A) (A) (A) (A) (A) (A) (A) (A)
                 (A) (A) (A) (A) (A) (A) (A) (A) (A) (A) (A) (A)
                 (A) (A) (A) (A) (A) (A) (A) (A) (A) (A) (A) (A)
                 (A) (A) (A) (A) (A) (A) (A) (A) (A) (A) (A) (A)
                 (A) (A) (A) (A) (A) (A) (A) (A) (A) (A) (A) (A)
                 (A) (A) (A) (A) (A) (A) (A) (A) (A) (A) (A) (A)
                 (A) (A) (A) (A) (A) (A) (A) (A) (A) (A) (A) (A)
                 (A) (A) (A) (A) (A) (A) (A) (A) (A) (A) (A) (A)
                 (A) (A) (A) (A) (A) (A) (A) (A) (A) (A) (A) (A)
                 (A) (A) (A) (A) (A) (A) (A) (A) (A) (A) (A) (A)
                 (A) (A) (A) (A) (A) (A) (A) (A) (A) (A) (A) (A)
                 (A) (A) (A) (A) (A) (A) (A) (A) (A) (A) (A) (A)
                 (A) (A) (A) (A) (A) (A) (A) (A) (A) (A) (A) (A)
                 (A) (A) (A) (A) (A) (A) (A) (A) (A) (A) (A) (A)
                 (A) (A) (A) (A) (A) (A) (A) (A) (A) (A) (A) (A)
                 (A) (A) (A) (A) (A) (A) (A) (A) (A) (A) (A) (A)
                 (A) (A) (A) (A) (A) (A) (A) (A) (A) (A) (A) (A)
                 (A) (A) (A) (A) (A) (A) (A) (A) (A) (A) (A) (A)
                 (A) (A) (A) (A) (A) (A) (A) (A) (A) (A) (A) (A)
                 (A) (A) (A) (A) (A) (A) (A) (A) (A) (A) (A) (A)
                 (A) (A) (A) (A) (A) (A) (A) (A) (A) (A) (A) (A)
                 (A) (A) (A) (A) (A) (A) (A) (A) (A) (A) (A) (A)
                 (A) (A) (A) (A) (A) (A) (A) (A) (A) (A) (A) (A)
                 (A) (A) (A) (A) (A) (A) (A) (A) (A) (A) (A) (A)
                 (A) (A) (A) (A) (A) (A) (A) (A) (A) (A) (A) (A)
                 (A) (A) (A) (A) (A) (A) (A) (A) (A) (A) (A) (A)
                 (A) (A) (A) (A) (A) (A) (A) (A) (A) (A) (A) (A)
                 (A) (A) (A) (A) (A) (A) (A) (A) (A) (A) (A) (A)
                 (A) (A) (A) (A) (A) (A)
 The electronic state is 1-A.
 Alpha  occ. eigenvalues --  -19.18902 -19.18853 -19.11223 -10.25949 -10.25943
 Alpha  occ. eigenvalues --  -10.25845 -10.25617 -10.20484 -10.20068 -10.20001
 Alpha  occ. eigenvalues --  -10.19990 -10.19946 -10.19913 -10.19744 -10.19657
 Alpha  occ. eigenvalues --  -10.19612 -10.19561 -10.19507 -10.19448 -10.19404
 Alpha  occ. eigenvalues --  -10.19396 -10.19284 -10.19006 -10.18894 -10.18269
 Alpha  occ. eigenvalues --   -1.07522  -1.06961  -1.01148  -0.86664  -0.85837
 Alpha  occ. eigenvalues --   -0.85430  -0.80032  -0.77889  -0.75613  -0.75511
 Alpha  occ. eigenvalues --   -0.75229  -0.74955  -0.73021  -0.69527  -0.64849
 Alpha  occ. eigenvalues --   -0.63163  -0.62308  -0.61380  -0.60382  -0.58906
 Alpha  occ. eigenvalues --   -0.57330  -0.54992  -0.54401  -0.53343  -0.52079
 Alpha  occ. eigenvalues --   -0.50512  -0.48762  -0.48287  -0.47666  -0.46296
 Alpha  occ. eigenvalues --   -0.45875  -0.44536  -0.44189  -0.43698  -0.42776
 Alpha  occ. eigenvalues --   -0.42630  -0.42495  -0.42329  -0.41543  -0.41437
 Alpha  occ. eigenvalues --   -0.39909  -0.39302  -0.38645  -0.38515  -0.37792
 Alpha  occ. eigenvalues --   -0.36591  -0.36443  -0.35767  -0.34974  -0.34762
 Alpha  occ. eigenvalues --   -0.33851  -0.33715  -0.33111  -0.32701  -0.27721
 Alpha  occ. eigenvalues --   -0.26067  -0.25735  -0.25586  -0.25140  -0.23646
 Alpha  occ. eigenvalues --   -0.22659  -0.21144
 Alpha virt. eigenvalues --   -0.06613  -0.01314  -0.01155  -0.00731  -0.00589
 Alpha virt. eigenvalues --   -0.00344   0.04687   0.06404   0.08461   0.08830
 Alpha virt. eigenvalues --    0.09345   0.10231   0.10671   0.11467   0.12377
 Alpha virt. eigenvalues --    0.13467   0.14007   0.14918   0.15292   0.15576
 Alpha virt. eigenvalues --    0.16853   0.17093   0.17515   0.18252   0.18512
 Alpha virt. eigenvalues --    0.18660   0.19346   0.20311   0.20730   0.22321
 Alpha virt. eigenvalues --    0.23214   0.23613   0.25067   0.26251   0.27072
 Alpha virt. eigenvalues --    0.28107   0.29609   0.29930   0.30918   0.31393
 Alpha virt. eigenvalues --    0.32949   0.33487   0.33542   0.33900   0.35851
 Alpha virt. eigenvalues --    0.36644   0.37728   0.38793   0.43614   0.45126
 Alpha virt. eigenvalues --    0.45647   0.48137   0.48632   0.50441   0.51368
 Alpha virt. eigenvalues --    0.51813   0.51907   0.52643   0.52897   0.53614
 Alpha virt. eigenvalues --    0.54057   0.54872   0.55001   0.55255   0.55763
 Alpha virt. eigenvalues --    0.56335   0.56740   0.57681   0.57819   0.58087
 Alpha virt. eigenvalues --    0.58272   0.58691   0.58879   0.59123   0.59158
 Alpha virt. eigenvalues --    0.59442   0.60173   0.60620   0.60779   0.60906
 Alpha virt. eigenvalues --    0.61155   0.61678   0.62144   0.62262   0.62989
 Alpha virt. eigenvalues --    0.63789   0.64685   0.65323   0.65613   0.65897
 Alpha virt. eigenvalues --    0.66394   0.67608   0.69182   0.70397   0.71095
 Alpha virt. eigenvalues --    0.72198   0.73162   0.73542   0.74926   0.75929
 Alpha virt. eigenvalues --    0.76924   0.78949   0.79057   0.79294   0.80013
 Alpha virt. eigenvalues --    0.80633   0.81478   0.81960   0.82039   0.82202
 Alpha virt. eigenvalues --    0.82914   0.83698   0.84356   0.85143   0.85619
 Alpha virt. eigenvalues --    0.86635   0.87094   0.87773   0.88769   0.89056
 Alpha virt. eigenvalues --    0.89696   0.91038   0.92497   0.93214   0.94004
 Alpha virt. eigenvalues --    0.94372   0.94700   0.95648   0.96474   0.96989
 Alpha virt. eigenvalues --    0.98009   0.99327   0.99937   1.00149   1.02398
 Alpha virt. eigenvalues --    1.03522   1.04220   1.06214   1.06881   1.08543
 Alpha virt. eigenvalues --    1.08976   1.10051   1.10776   1.12393   1.14386
 Alpha virt. eigenvalues --    1.14865   1.15530   1.17076   1.17588   1.18569
 Alpha virt. eigenvalues --    1.18993   1.21162   1.21425   1.23319   1.23589
 Alpha virt. eigenvalues --    1.25038   1.25711   1.26464   1.27346   1.27830
 Alpha virt. eigenvalues --    1.29288   1.31484   1.31895   1.33169   1.33561
 Alpha virt. eigenvalues --    1.35016   1.35843   1.37640   1.38512   1.39305
 Alpha virt. eigenvalues --    1.39539   1.39844   1.39896   1.40301   1.40874
 Alpha virt. eigenvalues --    1.41123   1.41342   1.41424   1.41791   1.43081
 Alpha virt. eigenvalues --    1.44571   1.46076   1.48211   1.48749   1.49949
 Alpha virt. eigenvalues --    1.52430   1.54467   1.58256   1.60147   1.66340
 Alpha virt. eigenvalues --    1.68321   1.69981   1.71351   1.72435   1.74895
 Alpha virt. eigenvalues --    1.76246   1.76468   1.76721   1.77191   1.77471
 Alpha virt. eigenvalues --    1.78818   1.79457   1.81279   1.82895   1.85006
 Alpha virt. eigenvalues --    1.85693   1.86051   1.86190   1.87275   1.88161
 Alpha virt. eigenvalues --    1.88425   1.89176   1.89928   1.90523   1.91004
 Alpha virt. eigenvalues --    1.91531   1.91847   1.92042   1.92293   1.92892
 Alpha virt. eigenvalues --    1.94049   1.95320   1.96048   1.96156   1.96417
 Alpha virt. eigenvalues --    1.97017   1.98191   1.98556   1.99391   1.99909
 Alpha virt. eigenvalues --    2.00539   2.01082   2.02953   2.04198   2.04732
 Alpha virt. eigenvalues --    2.04934   2.07561   2.08302   2.09936   2.10771
 Alpha virt. eigenvalues --    2.11112   2.13767   2.14285   2.16107   2.21195
 Alpha virt. eigenvalues --    2.22166   2.25217   2.25553   2.26356   2.27105
 Alpha virt. eigenvalues --    2.28489   2.28695   2.28909   2.29401   2.30364
 Alpha virt. eigenvalues --    2.31645   2.32961   2.33840   2.34118   2.36087
 Alpha virt. eigenvalues --    2.36545   2.36996   2.37597   2.39820   2.40214
 Alpha virt. eigenvalues --    2.40628   2.40638   2.40913   2.42275   2.42462
 Alpha virt. eigenvalues --    2.43899   2.44354   2.46329   2.47444   2.47959
 Alpha virt. eigenvalues --    2.48422   2.48677   2.49205   2.49423   2.50459
 Alpha virt. eigenvalues --    2.51696   2.51981   2.52311   2.52935   2.53501
 Alpha virt. eigenvalues --    2.54605   2.55671   2.56547   2.59212   2.59330
 Alpha virt. eigenvalues --    2.60255   2.60846   2.61977   2.62376   2.62985
 Alpha virt. eigenvalues --    2.63662   2.64482   2.64815   2.67344   2.68562
 Alpha virt. eigenvalues --    2.69487   2.71364   2.72348   2.72613   2.74043
 Alpha virt. eigenvalues --    2.74975   2.75324   2.75844   2.78155   2.78995
 Alpha virt. eigenvalues --    2.79918   2.80652   2.82235   2.83744   2.85773
 Alpha virt. eigenvalues --    2.88573   2.89587   2.92152   2.93611   2.96332
 Alpha virt. eigenvalues --    2.98154   2.99378   3.02157   3.04905   3.05557
 Alpha virt. eigenvalues --    3.06898   3.07886   3.12536   3.17038   3.18838
 Alpha virt. eigenvalues --    3.19536   3.20559   3.23260   3.24363   3.24918
 Alpha virt. eigenvalues --    3.25334   3.25610   3.32490   3.33536   3.35033
 Alpha virt. eigenvalues --    3.36185   3.40216   3.41246   3.44497   3.45431
 Alpha virt. eigenvalues --    3.50397   3.51289   3.51742   3.52735   3.58474
 Alpha virt. eigenvalues --    3.82838   3.85394   3.89354   3.98032   4.04865
 Alpha virt. eigenvalues --    4.08354   4.10820   4.12792   4.14393   4.15056
 Alpha virt. eigenvalues --    4.15364   4.15690   4.16115   4.20986   4.27908
 Alpha virt. eigenvalues --    4.32940   4.37711   4.42688   4.42891   4.43091
 Alpha virt. eigenvalues --    4.44512   4.47460   4.53522   4.58791   4.65133
 Alpha virt. eigenvalues --    4.82705   4.84610   4.87939
          Condensed to atoms (all electrons):
              1          2          3          4          5          6
     1  C    4.919083   0.518691  -0.021211  -0.041490  -0.055335   0.515246
     2  C    0.518691   4.931387   0.524619  -0.059143  -0.042342  -0.024120
     3  C   -0.021211   0.524619   4.546760   0.467362  -0.007528  -0.030743
     4  C   -0.041490  -0.059143   0.467362   5.051124   0.452258  -0.022756
     5  C   -0.055335  -0.042342  -0.007528   0.452258   4.976782   0.513946
     6  C    0.515246  -0.024120  -0.030743  -0.022756   0.513946   4.717368
     7  O    0.003203  -0.053291   0.269802  -0.058638   0.003799   0.000149
     8  C   -0.055299   0.006604   0.000329   0.007292  -0.036247   0.350694
     9  C   -0.013571   0.000034   0.000016  -0.000295   0.006907  -0.031571
    10  C    0.000302  -0.000003   0.000000   0.000001  -0.000239   0.004801
    11  C    0.000007   0.000000   0.000000   0.000000  -0.000001  -0.000108
    12  C    0.000000   0.000000   0.000000   0.000000   0.000000  -0.000001
    13  C    0.000000   0.000000   0.000000   0.000000   0.000000   0.000000
    14  C    0.000000   0.000000   0.000000   0.000000   0.000000   0.000000
    15  C    0.000000   0.000000   0.000000   0.000000   0.000000   0.000000
    16  C    0.000000   0.000000   0.000000   0.000000   0.000000  -0.000002
    17  O    0.000000   0.000000   0.000000   0.000000   0.000000   0.000000
    18  C   -0.000101   0.003232  -0.030577  -0.006747   0.000385  -0.000005
    19  C    0.000003  -0.000169   0.002878   0.000790  -0.000008   0.000000
    20  C    0.000000  -0.000078   0.000335   0.000021   0.000000   0.000000
    21  C    0.000000   0.000000  -0.000002   0.000000   0.000000   0.000000
    22  C    0.000000   0.000000   0.000000   0.000000   0.000000   0.000000
    23  C    0.000000   0.000000   0.000000   0.000000   0.000000   0.000000
    24  C    0.000000   0.000004   0.000019  -0.000012   0.000000   0.000000
    25  O    0.000006   0.000000   0.000000   0.000000  -0.000037   0.001287
    26  H    0.362907  -0.042106   0.004484   0.000131   0.006455  -0.037469
    27  H   -0.035668   0.356895  -0.036858   0.006947   0.000258   0.003692
    28  H    0.000730   0.004258  -0.045909   0.364613  -0.031078   0.003138
    29  H    0.005757   0.000545   0.003273  -0.038222   0.364149  -0.040289
    30  H    0.005586  -0.000135  -0.000007   0.000309  -0.009120  -0.040514
    31  H    0.002312   0.000042  -0.000006   0.000009   0.000113  -0.009470
    32  H    0.000000   0.000000   0.000000   0.000000   0.000000   0.000000
    33  H    0.000000   0.000000   0.000000   0.000000   0.000000   0.000000
    34  H    0.000000   0.000000   0.000000   0.000000   0.000000   0.000000
    35  H   -0.000007   0.000000   0.000000   0.000000   0.000000  -0.000005
    36  H    0.000000   0.000000   0.000000   0.000000   0.000000   0.000000
    37  H    0.000004  -0.000045  -0.005158   0.004486  -0.000088  -0.000003
    38  H   -0.000005   0.000161  -0.004188   0.004954  -0.000187  -0.000001
    39  H    0.000000  -0.000036   0.000107   0.000025  -0.000001   0.000000
    40  H    0.000000   0.000000   0.000000   0.000000   0.000000   0.000000
    41  H    0.000000   0.000000   0.000000   0.000000   0.000000   0.000000
    42  H    0.000000   0.000000   0.000000   0.000000   0.000000   0.000000
    43  H    0.000000   0.000000  -0.000003   0.000002   0.000000   0.000000
              7          8          9         10         11         12
     1  C    0.003203  -0.055299  -0.013571   0.000302   0.000007   0.000000
     2  C   -0.053291   0.006604   0.000034  -0.000003   0.000000   0.000000
     3  C    0.269802   0.000329   0.000016   0.000000   0.000000   0.000000
     4  C   -0.058638   0.007292  -0.000295   0.000001   0.000000   0.000000
     5  C    0.003799  -0.036247   0.006907  -0.000239  -0.000001   0.000000
     6  C    0.000149   0.350694  -0.031571   0.004801  -0.000108  -0.000001
     7  O    8.264623   0.000000   0.000000   0.000000   0.000000   0.000000
     8  C    0.000000   5.010533   0.495463  -0.001053   0.010474  -0.000350
     9  C    0.000000   0.495463   5.313862   0.292379  -0.097913   0.011855
    10  C    0.000000  -0.001053   0.292379   4.592143   0.278222  -0.029057
    11  C    0.000000   0.010474  -0.097913   0.278222   5.059542   0.482038
    12  C    0.000000  -0.000350   0.011855  -0.029057   0.482038   4.969285
    13  C    0.000000   0.000001  -0.000150   0.006370  -0.032864   0.442275
    14  C    0.000000   0.000001  -0.000033   0.000323  -0.032706  -0.008593
    15  C    0.000000  -0.000006  -0.000047   0.004835  -0.025457  -0.036576
    16  C    0.000000   0.000194  -0.009070  -0.035778   0.499289  -0.072705
    17  O    0.000000   0.000000   0.000000   0.000000   0.000155   0.004549
    18  C    0.205782   0.000000   0.000000   0.000000   0.000000   0.000000
    19  C   -0.044423   0.000000   0.000000   0.000000   0.000000   0.000000
    20  C    0.004030   0.000000   0.000000   0.000000   0.000000   0.000000
    21  C    0.000229   0.000000   0.000000   0.000000   0.000000   0.000000
    22  C    0.000007   0.000000   0.000000   0.000000   0.000000   0.000000
    23  C   -0.000083   0.000000   0.000000   0.000000   0.000000   0.000000
    24  C    0.000699   0.000000   0.000000   0.000000   0.000000   0.000000
    25  O    0.000000   0.000958  -0.116731   0.572131  -0.098045  -0.001090
    26  H   -0.000062  -0.012962   0.004221   0.000053   0.000017   0.000000
    27  H   -0.000091  -0.000161   0.000005   0.000000   0.000000   0.000000
    28  H   -0.007634  -0.000178   0.000002   0.000000   0.000000   0.000000
    29  H   -0.000051  -0.009132   0.000222   0.000000   0.000000   0.000000
    30  H    0.000000   0.369355  -0.065908  -0.009045   0.001298  -0.000032
    31  H    0.000000  -0.047246   0.354825  -0.027213  -0.007727  -0.000357
    32  H    0.000000  -0.000021   0.001008  -0.011473  -0.041570   0.361967
    33  H    0.000000   0.000000   0.000002  -0.000135   0.003155  -0.029090
    34  H    0.000000   0.000000   0.000016  -0.000119   0.003558   0.000298
    35  H    0.000000   0.000049   0.003517  -0.011013  -0.038399   0.006237
    36  H    0.000000   0.000000   0.000000   0.000000  -0.000047   0.000681
    37  H   -0.032553   0.000000   0.000000   0.000000   0.000000   0.000000
    38  H   -0.039110   0.000000   0.000000   0.000000   0.000000   0.000000
    39  H    0.007943   0.000000   0.000000   0.000000   0.000000   0.000000
    40  H   -0.000001   0.000000   0.000000   0.000000   0.000000   0.000000
    41  H    0.000000   0.000000   0.000000   0.000000   0.000000   0.000000
    42  H    0.000000   0.000000   0.000000   0.000000   0.000000   0.000000
    43  H    0.000059   0.000000   0.000000   0.000000   0.000000   0.000000
             13         14         15         16         17         18
     1  C    0.000000   0.000000   0.000000   0.000000   0.000000  -0.000101
     2  C    0.000000   0.000000   0.000000   0.000000   0.000000   0.003232
     3  C    0.000000   0.000000   0.000000   0.000000   0.000000  -0.030577
     4  C    0.000000   0.000000   0.000000   0.000000   0.000000  -0.006747
     5  C    0.000000   0.000000   0.000000   0.000000   0.000000   0.000385
     6  C    0.000000   0.000000   0.000000  -0.000002   0.000000  -0.000005
     7  O    0.000000   0.000000   0.000000   0.000000   0.000000   0.205782
     8  C    0.000001   0.000001  -0.000006   0.000194   0.000000   0.000000
     9  C   -0.000150  -0.000033  -0.000047  -0.009070   0.000000   0.000000
    10  C    0.006370   0.000323   0.004835  -0.035778   0.000000   0.000000
    11  C   -0.032864  -0.032706  -0.025457   0.499289   0.000155   0.000000
    12  C    0.442275  -0.008593  -0.036576  -0.072705   0.004549   0.000000
    13  C    5.074242   0.487580  -0.062228  -0.038009  -0.062124   0.000000
    14  C    0.487580   4.539439   0.536350  -0.023013   0.275787   0.000000
    15  C   -0.062228   0.536350   4.901753   0.518638  -0.052629   0.000000
    16  C   -0.038009  -0.023013   0.518638   4.934618   0.003039   0.000000
    17  O   -0.062124   0.275787  -0.052629   0.003039   8.093409   0.000000
    18  C    0.000000   0.000000   0.000000   0.000000   0.000000   4.865261
    19  C    0.000000   0.000000   0.000000   0.000000   0.000000   0.358346
    20  C    0.000000   0.000000   0.000000   0.000000   0.000000  -0.063177
    21  C    0.000000   0.000000   0.000000   0.000000   0.000000   0.005880
    22  C    0.000000   0.000000   0.000000   0.000000   0.000000   0.000375
    23  C    0.000000   0.000000   0.000000   0.000000   0.000000   0.006489
    24  C    0.000000   0.000000   0.000000   0.000000   0.000000  -0.047633
    25  O    0.001128  -0.000014  -0.000038   0.004077   0.000000   0.000000
    26  H    0.000000   0.000000   0.000000  -0.000021   0.000000   0.000002
    27  H    0.000000   0.000000   0.000000   0.000000   0.000000  -0.000284
    28  H    0.000000   0.000000   0.000000   0.000000   0.000000   0.004284
    29  H    0.000000   0.000000   0.000000   0.000000   0.000000  -0.000007
    30  H    0.000000   0.000000   0.000000  -0.000025   0.000000   0.000000
    31  H    0.000001  -0.000007   0.000470   0.002020   0.000000   0.000000
    32  H   -0.036959   0.003307   0.000412   0.006097  -0.000047   0.000000
    33  H    0.357616  -0.047601   0.004870   0.000682  -0.006394   0.000000
    34  H    0.006435  -0.036871   0.358751  -0.035958  -0.001429   0.000000
    35  H    0.000409   0.004514  -0.041111   0.360733  -0.000063   0.000000
    36  H   -0.006469  -0.036296   0.006406  -0.000164   0.297113   0.000000
    37  H    0.000000   0.000000   0.000000   0.000000   0.000000   0.359853
    38  H    0.000000   0.000000   0.000000   0.000000   0.000000   0.356701
    39  H    0.000000   0.000000   0.000000   0.000000   0.000000  -0.010459
    40  H    0.000000   0.000000   0.000000   0.000000   0.000000  -0.000192
    41  H    0.000000   0.000000   0.000000   0.000000   0.000000   0.000007
    42  H    0.000000   0.000000   0.000000   0.000000   0.000000  -0.000182
    43  H    0.000000   0.000000   0.000000   0.000000   0.000000  -0.011020
             19         20         21         22         23         24
     1  C    0.000003   0.000000   0.000000   0.000000   0.000000   0.000000
     2  C   -0.000169  -0.000078   0.000000   0.000000   0.000000   0.000004
     3  C    0.002878   0.000335  -0.000002   0.000000   0.000000   0.000019
     4  C    0.000790   0.000021   0.000000   0.000000   0.000000  -0.000012
     5  C   -0.000008   0.000000   0.000000   0.000000   0.000000   0.000000
     6  C    0.000000   0.000000   0.000000   0.000000   0.000000   0.000000
     7  O   -0.044423   0.004030   0.000229   0.000007  -0.000083   0.000699
     8  C    0.000000   0.000000   0.000000   0.000000   0.000000   0.000000
     9  C    0.000000   0.000000   0.000000   0.000000   0.000000   0.000000
    10  C    0.000000   0.000000   0.000000   0.000000   0.000000   0.000000
    11  C    0.000000   0.000000   0.000000   0.000000   0.000000   0.000000
    12  C    0.000000   0.000000   0.000000   0.000000   0.000000   0.000000
    13  C    0.000000   0.000000   0.000000   0.000000   0.000000   0.000000
    14  C    0.000000   0.000000   0.000000   0.000000   0.000000   0.000000
    15  C    0.000000   0.000000   0.000000   0.000000   0.000000   0.000000
    16  C    0.000000   0.000000   0.000000   0.000000   0.000000   0.000000
    17  O    0.000000   0.000000   0.000000   0.000000   0.000000   0.000000
    18  C    0.358346  -0.063177   0.005880   0.000375   0.006489  -0.047633
    19  C    4.755280   0.527357  -0.023459  -0.034301  -0.024176   0.546435
    20  C    0.527357   4.883186   0.523496  -0.038693  -0.046020  -0.037877
    21  C   -0.023459   0.523496   4.825550   0.543096  -0.029358  -0.045687
    22  C   -0.034301  -0.038693   0.543096   4.803849   0.551652  -0.040406
    23  C   -0.024176  -0.046020  -0.029358   0.551652   4.817088   0.522034
    24  C    0.546435  -0.037877  -0.045687  -0.040406   0.522034   4.887800
    25  O    0.000000   0.000000   0.000000   0.000000   0.000000   0.000000
    26  H    0.000000   0.000000   0.000000   0.000000   0.000000   0.000000
    27  H   -0.000023   0.000013   0.000000   0.000000   0.000000   0.000000
    28  H    0.000187   0.000001   0.000000   0.000000   0.000000   0.000002
    29  H    0.000000   0.000000   0.000000   0.000000   0.000000   0.000000
    30  H    0.000000   0.000000   0.000000   0.000000   0.000000   0.000000
    31  H    0.000000   0.000000   0.000000   0.000000   0.000000   0.000000
    32  H    0.000000   0.000000   0.000000   0.000000   0.000000   0.000000
    33  H    0.000000   0.000000   0.000000   0.000000   0.000000   0.000000
    34  H    0.000000   0.000000   0.000000   0.000000   0.000000   0.000000
    35  H    0.000000   0.000000   0.000000   0.000000   0.000000   0.000000
    36  H    0.000000   0.000000   0.000000   0.000000   0.000000   0.000000
    37  H   -0.035322   0.006788  -0.000122   0.000004   0.000092  -0.005633
    38  H   -0.025569  -0.007316  -0.000132   0.000038  -0.000311   0.001107
    39  H   -0.046057   0.370300  -0.041568   0.004763   0.000370   0.005711
    40  H    0.003690  -0.037960   0.367124  -0.041275   0.004479   0.000980
    41  H    0.000687   0.004679  -0.041341   0.369246  -0.041373   0.004844
    42  H    0.003893   0.000904   0.004459  -0.041209   0.366559  -0.037480
    43  H   -0.044697   0.006202   0.000356   0.004844  -0.042451   0.364653
             25         26         27         28         29         30
     1  C    0.000006   0.362907  -0.035668   0.000730   0.005757   0.005586
     2  C    0.000000  -0.042106   0.356895   0.004258   0.000545  -0.000135
     3  C    0.000000   0.004484  -0.036858  -0.045909   0.003273  -0.000007
     4  C    0.000000   0.000131   0.006947   0.364613  -0.038222   0.000309
     5  C   -0.000037   0.006455   0.000258  -0.031078   0.364149  -0.009120
     6  C    0.001287  -0.037469   0.003692   0.003138  -0.040289  -0.040514
     7  O    0.000000  -0.000062  -0.000091  -0.007634  -0.000051   0.000000
     8  C    0.000958  -0.012962  -0.000161  -0.000178  -0.009132   0.369355
     9  C   -0.116731   0.004221   0.000005   0.000002   0.000222  -0.065908
    10  C    0.572131   0.000053   0.000000   0.000000   0.000000  -0.009045
    11  C   -0.098045   0.000017   0.000000   0.000000   0.000000   0.001298
    12  C   -0.001090   0.000000   0.000000   0.000000   0.000000  -0.000032
    13  C    0.001128   0.000000   0.000000   0.000000   0.000000   0.000000
    14  C   -0.000014   0.000000   0.000000   0.000000   0.000000   0.000000
    15  C   -0.000038   0.000000   0.000000   0.000000   0.000000   0.000000
    16  C    0.004077  -0.000021   0.000000   0.000000   0.000000  -0.000025
    17  O    0.000000   0.000000   0.000000   0.000000   0.000000   0.000000
    18  C    0.000000   0.000002  -0.000284   0.004284  -0.000007   0.000000
    19  C    0.000000   0.000000  -0.000023   0.000187   0.000000   0.000000
    20  C    0.000000   0.000000   0.000013   0.000001   0.000000   0.000000
    21  C    0.000000   0.000000   0.000000   0.000000   0.000000   0.000000
    22  C    0.000000   0.000000   0.000000   0.000000   0.000000   0.000000
    23  C    0.000000   0.000000   0.000000   0.000000   0.000000   0.000000
    24  C    0.000000   0.000000   0.000000   0.000002   0.000000   0.000000
    25  O    8.100413   0.000002   0.000000   0.000000  -0.000005   0.022326
    26  H    0.000002   0.630625  -0.006656   0.000016  -0.000191   0.000000
    27  H    0.000000  -0.006656   0.611383  -0.000169   0.000016   0.000002
    28  H    0.000000   0.000016  -0.000169   0.616129  -0.005974  -0.000008
    29  H   -0.000005  -0.000191   0.000016  -0.005974   0.617098   0.006068
    30  H    0.022326   0.000000   0.000002  -0.000008   0.006068   0.596453
    31  H    0.003065   0.002878   0.000005   0.000000   0.000008   0.006235
    32  H    0.020651   0.000000   0.000000   0.000000   0.000000  -0.000015
    33  H    0.000003   0.000000   0.000000   0.000000   0.000000   0.000000
    34  H    0.000000   0.000000   0.000000   0.000000   0.000000   0.000000
    35  H   -0.000018   0.000057   0.000000   0.000000   0.000000  -0.000007
    36  H    0.000000   0.000000   0.000000   0.000000   0.000000   0.000000
    37  H    0.000000   0.000000   0.000023   0.001647   0.000001   0.000000
    38  H    0.000000   0.000000   0.000034   0.001732   0.000001   0.000000
    39  H    0.000000   0.000000   0.000102   0.000004   0.000000   0.000000
    40  H    0.000000   0.000000   0.000000   0.000000   0.000000   0.000000
    41  H    0.000000   0.000000   0.000000   0.000000   0.000000   0.000000
    42  H    0.000000   0.000000   0.000000   0.000000   0.000000   0.000000
    43  H    0.000000   0.000000   0.000000   0.000004   0.000000   0.000000
             31         32         33         34         35         36
     1  C    0.002312   0.000000   0.000000   0.000000  -0.000007   0.000000
     2  C    0.000042   0.000000   0.000000   0.000000   0.000000   0.000000
     3  C   -0.000006   0.000000   0.000000   0.000000   0.000000   0.000000
     4  C    0.000009   0.000000   0.000000   0.000000   0.000000   0.000000
     5  C    0.000113   0.000000   0.000000   0.000000   0.000000   0.000000
     6  C   -0.009470   0.000000   0.000000   0.000000  -0.000005   0.000000
     7  O    0.000000   0.000000   0.000000   0.000000   0.000000   0.000000
     8  C   -0.047246  -0.000021   0.000000   0.000000   0.000049   0.000000
     9  C    0.354825   0.001008   0.000002   0.000016   0.003517   0.000000
    10  C   -0.027213  -0.011473  -0.000135  -0.000119  -0.011013   0.000000
    11  C   -0.007727  -0.041570   0.003155   0.003558  -0.038399  -0.000047
    12  C   -0.000357   0.361967  -0.029090   0.000298   0.006237   0.000681
    13  C    0.000001  -0.036959   0.357616   0.006435   0.000409  -0.006469
    14  C   -0.000007   0.003307  -0.047601  -0.036871   0.004514  -0.036296
    15  C    0.000470   0.000412   0.004870   0.358751  -0.041111   0.006406
    16  C    0.002020   0.006097   0.000682  -0.035958   0.360733  -0.000164
    17  O    0.000000  -0.000047  -0.006394  -0.001429  -0.000063   0.297113
    18  C    0.000000   0.000000   0.000000   0.000000   0.000000   0.000000
    19  C    0.000000   0.000000   0.000000   0.000000   0.000000   0.000000
    20  C    0.000000   0.000000   0.000000   0.000000   0.000000   0.000000
    21  C    0.000000   0.000000   0.000000   0.000000   0.000000   0.000000
    22  C    0.000000   0.000000   0.000000   0.000000   0.000000   0.000000
    23  C    0.000000   0.000000   0.000000   0.000000   0.000000   0.000000
    24  C    0.000000   0.000000   0.000000   0.000000   0.000000   0.000000
    25  O    0.003065   0.020651   0.000003   0.000000  -0.000018   0.000000
    26  H    0.002878   0.000000   0.000000   0.000000   0.000057   0.000000
    27  H    0.000005   0.000000   0.000000   0.000000   0.000000   0.000000
    28  H    0.000000   0.000000   0.000000   0.000000   0.000000   0.000000
    29  H    0.000008   0.000000   0.000000   0.000000   0.000000   0.000000
    30  H    0.006235  -0.000015   0.000000   0.000000  -0.000007   0.000000
    31  H    0.642190  -0.000030   0.000000  -0.000002   0.001363   0.000000
    32  H   -0.000030   0.581761  -0.005357   0.000016  -0.000170  -0.000009
    33  H    0.000000  -0.005357   0.635482  -0.000177   0.000016   0.006371
    34  H   -0.000002   0.000016  -0.000177   0.613549  -0.006509  -0.000328
    35  H    0.001363  -0.000170   0.000016  -0.006509   0.631534   0.000006
    36  H    0.000000  -0.000009   0.006371  -0.000328   0.000006   0.411895
    37  H    0.000000   0.000000   0.000000   0.000000   0.000000   0.000000
    38  H    0.000000   0.000000   0.000000   0.000000   0.000000   0.000000
    39  H    0.000000   0.000000   0.000000   0.000000   0.000000   0.000000
    40  H    0.000000   0.000000   0.000000   0.000000   0.000000   0.000000
    41  H    0.000000   0.000000   0.000000   0.000000   0.000000   0.000000
    42  H    0.000000   0.000000   0.000000   0.000000   0.000000   0.000000
    43  H    0.000000   0.000000   0.000000   0.000000   0.000000   0.000000
             37         38         39         40         41         42
     1  C    0.000004  -0.000005   0.000000   0.000000   0.000000   0.000000
     2  C   -0.000045   0.000161  -0.000036   0.000000   0.000000   0.000000
     3  C   -0.005158  -0.004188   0.000107   0.000000   0.000000   0.000000
     4  C    0.004486   0.004954   0.000025   0.000000   0.000000   0.000000
     5  C   -0.000088  -0.000187  -0.000001   0.000000   0.000000   0.000000
     6  C   -0.000003  -0.000001   0.000000   0.000000   0.000000   0.000000
     7  O   -0.032553  -0.039110   0.007943  -0.000001   0.000000   0.000000
     8  C    0.000000   0.000000   0.000000   0.000000   0.000000   0.000000
     9  C    0.000000   0.000000   0.000000   0.000000   0.000000   0.000000
    10  C    0.000000   0.000000   0.000000   0.000000   0.000000   0.000000
    11  C    0.000000   0.000000   0.000000   0.000000   0.000000   0.000000
    12  C    0.000000   0.000000   0.000000   0.000000   0.000000   0.000000
    13  C    0.000000   0.000000   0.000000   0.000000   0.000000   0.000000
    14  C    0.000000   0.000000   0.000000   0.000000   0.000000   0.000000
    15  C    0.000000   0.000000   0.000000   0.000000   0.000000   0.000000
    16  C    0.000000   0.000000   0.000000   0.000000   0.000000   0.000000
    17  O    0.000000   0.000000   0.000000   0.000000   0.000000   0.000000
    18  C    0.359853   0.356701  -0.010459  -0.000192   0.000007  -0.000182
    19  C   -0.035322  -0.025569  -0.046057   0.003690   0.000687   0.003893
    20  C    0.006788  -0.007316   0.370300  -0.037960   0.004679   0.000904
    21  C   -0.000122  -0.000132  -0.041568   0.367124  -0.041341   0.004459
    22  C    0.000004   0.000038   0.004763  -0.041275   0.369246  -0.041209
    23  C    0.000092  -0.000311   0.000370   0.004479  -0.041373   0.366559
    24  C   -0.005633   0.001107   0.005711   0.000980   0.004844  -0.037480
    25  O    0.000000   0.000000   0.000000   0.000000   0.000000   0.000000
    26  H    0.000000   0.000000   0.000000   0.000000   0.000000   0.000000
    27  H    0.000023   0.000034   0.000102   0.000000   0.000000   0.000000
    28  H    0.001647   0.001732   0.000004   0.000000   0.000000   0.000000
    29  H    0.000001   0.000001   0.000000   0.000000   0.000000   0.000000
    30  H    0.000000   0.000000   0.000000   0.000000   0.000000   0.000000
    31  H    0.000000   0.000000   0.000000   0.000000   0.000000   0.000000
    32  H    0.000000   0.000000   0.000000   0.000000   0.000000   0.000000
    33  H    0.000000   0.000000   0.000000   0.000000   0.000000   0.000000
    34  H    0.000000   0.000000   0.000000   0.000000   0.000000   0.000000
    35  H    0.000000   0.000000   0.000000   0.000000   0.000000   0.000000
    36  H    0.000000   0.000000   0.000000   0.000000   0.000000   0.000000
    37  H    0.646801  -0.056086   0.000322   0.000002   0.000000  -0.000006
    38  H   -0.056086   0.648367   0.000701   0.000001   0.000000   0.000004
    39  H    0.000322   0.000701   0.617148  -0.005810  -0.000175   0.000017
    40  H    0.000002   0.000001  -0.005810   0.625284  -0.006013  -0.000194
    41  H    0.000000   0.000000  -0.000175  -0.006013   0.627250  -0.006085
    42  H   -0.000006   0.000004   0.000017  -0.000194  -0.006085   0.626374
    43  H    0.007181   0.000251  -0.000171   0.000017  -0.000185  -0.006076
             43
     1  C    0.000000
     2  C    0.000000
     3  C   -0.000003
     4  C    0.000002
     5  C    0.000000
     6  C    0.000000
     7  O    0.000059
     8  C    0.000000
     9  C    0.000000
    10  C    0.000000
    11  C    0.000000
    12  C    0.000000
    13  C    0.000000
    14  C    0.000000
    15  C    0.000000
    16  C    0.000000
    17  O    0.000000
    18  C   -0.011020
    19  C   -0.044697
    20  C    0.006202
    21  C    0.000356
    22  C    0.004844
    23  C   -0.042451
    24  C    0.364653
    25  O    0.000000
    26  H    0.000000
    27  H    0.000000
    28  H    0.000004
    29  H    0.000000
    30  H    0.000000
    31  H    0.000000
    32  H    0.000000
    33  H    0.000000
    34  H    0.000000
    35  H    0.000000
    36  H    0.000000
    37  H    0.007181
    38  H    0.000251
    39  H   -0.000171
    40  H    0.000017
    41  H   -0.000185
    42  H   -0.006076
    43  H    0.638898
 Mulliken atomic charges:
              1
     1  C   -0.111151
     2  C   -0.125004
     3  C    0.362206
     4  C   -0.133021
     5  C   -0.142840
     6  C    0.126736
     7  O   -0.524390
     8  C   -0.089291
     9  C   -0.149047
    10  C    0.373571
    11  C    0.037082
    12  C   -0.101333
    13  C   -0.137252
    14  C    0.337833
    15  C   -0.114393
    16  C   -0.114642
    17  O   -0.551364
    18  C    0.003789
    19  C    0.078659
    20  C   -0.096191
    21  C   -0.088523
    22  C   -0.081990
    23  C   -0.084991
    24  C   -0.119560
    25  O   -0.510070
    26  H    0.087620
    27  H    0.100534
    28  H    0.094202
    29  H    0.096730
    30  H    0.117184
    31  H    0.076523
    32  H    0.120432
    33  H    0.080557
    34  H    0.098772
    35  H    0.088867
    36  H    0.320840
    37  H    0.107813
    38  H    0.118854
    39  H    0.096766
    40  H    0.089866
    41  H    0.088459
    42  H    0.089021
    43  H    0.082134
 Sum of Mulliken atomic charges =   0.00000
 Mulliken charges with hydrogens summed into heavy atoms:
              1
     1  C   -0.023531
     2  C   -0.024469
     3  C    0.362206
     4  C   -0.038819
     5  C   -0.046110
     6  C    0.126736
     7  O   -0.524390
     8  C    0.027893
     9  C   -0.072524
    10  C    0.373571
    11  C    0.037082
    12  C    0.019100
    13  C   -0.056695
    14  C    0.337833
    15  C   -0.015621
    16  C   -0.025775
    17  O   -0.230524
    18  C    0.230456
    19  C    0.078659
    20  C    0.000574
    21  C    0.001343
    22  C    0.006469
    23  C    0.004030
    24  C   -0.037426
    25  O   -0.510070
 Sum of Mulliken charges with hydrogens summed into heavy atoms =   0.00000
 Electronic spatial extent (au):  <R**2>=          20986.1173
 Charge=              0.0000 electrons
 Dipole moment (field-independent basis, Debye):
    X=             -1.8995    Y=             -1.0801    Z=              0.0756  Tot=              2.1864
 Quadrupole moment (field-independent basis, Debye-Ang):
   XX=            -99.1218   YY=           -142.9957   ZZ=           -146.7290
   XY=             -8.4672   XZ=              2.1064   YZ=             -3.0742
 Traceless Quadrupole moment (field-independent basis, Debye-Ang):
   XX=             30.4937   YY=            -13.3802   ZZ=            -17.1135
   XY=             -8.4672   XZ=              2.1064   YZ=             -3.0742
 Octapole moment (field-independent basis, Debye-Ang**2):
  XXX=            238.6824  YYY=            -10.7822  ZZZ=              0.3288  XYY=            -56.8653
  XXY=             -1.3379  XXZ=              0.9511  XZZ=             -5.0647  YZZ=             -0.2277
  YYZ=              2.2439  XYZ=             20.9478
 Hexadecapole moment (field-independent basis, Debye-Ang**3):
 XXXX=         -20163.7388 YYYY=          -1468.7441 ZZZZ=           -289.3081 XXXY=            388.8962
 XXXZ=            470.8213 YYYX=            -48.1901 YYYZ=             -8.6845 ZZZX=              3.4330
 ZZZY=             -4.9639 XXYY=          -4843.0505 XXZZ=          -4587.9942 YYZZ=           -292.6459
 XXYZ=           -183.8055 YYXZ=            -39.3774 ZZXY=             -6.5632
 N-N= 1.771959741383D+03 E-N=-6.042078289456D+03  KE= 1.064746708225D+03
 Calling FoFJK, ICntrl=      2127 FMM=F ISym2X=0 I1Cent= 0 IOpClX= 0 NMat=1 NMatS=1 NMatT=0.
 ***** Axes restored to original set *****
 -------------------------------------------------------------------
 Center     Atomic                   Forces (Hartrees/Bohr)
 Number     Number              X              Y              Z
 -------------------------------------------------------------------
      1        6           0.000002106   -0.000005003    0.000000532
      2        6           0.000001985   -0.000001746   -0.000001387
      3        6           0.000000647    0.000009095   -0.000001399
      4        6          -0.000002370    0.000004904   -0.000001765
      5        6          -0.000002941    0.000008745   -0.000000834
      6        6           0.000000904    0.000004205    0.000001777
      7        8           0.000007266   -0.000024790    0.000005950
      8        6          -0.000000285    0.000002400   -0.000001476
      9        6           0.000000209    0.000001456   -0.000003736
     10        6           0.000006545    0.000005282   -0.000004465
     11        6          -0.000003359    0.000002082    0.000008749
     12        6          -0.000004537    0.000000598   -0.000005356
     13        6           0.000004181    0.000002083    0.000005899
     14        6          -0.000004848   -0.000003115   -0.000007351
     15        6           0.000004420   -0.000005102    0.000001933
     16        6           0.000001751   -0.000002217   -0.000004880
     17        8          -0.000005343   -0.000002248    0.000013875
     18        6          -0.000013581    0.000006582   -0.000005689
     19        6          -0.000009742   -0.000005234    0.000002658
     20        6          -0.000004797    0.000013183   -0.000005597
     21        6           0.000005036   -0.000003135    0.000004830
     22        6          -0.000002195   -0.000007701   -0.000003176
     23        6          -0.000003010   -0.000001847   -0.000002760
     24        6           0.000009997   -0.000012019    0.000006879
     25        8          -0.000003552    0.000011311    0.000006966
     26        1          -0.000000974   -0.000004813   -0.000001083
     27        1          -0.000002116   -0.000005653    0.000001030
     28        1           0.000001343    0.000004956    0.000001355
     29        1           0.000001612    0.000009033   -0.000000006
     30        1           0.000001550    0.000002403   -0.000000088
     31        1           0.000005749    0.000000945    0.000005142
     32        1           0.000003478    0.000006929    0.000000772
     33        1           0.000002033    0.000002520   -0.000003268
     34        1          -0.000002500   -0.000007278    0.000000868
     35        1          -0.000006147   -0.000003198   -0.000003464
     36        1           0.000007284   -0.000005535   -0.000011098
     37        1          -0.000010931    0.000012537   -0.000004329
     38        1           0.000016951    0.000005684    0.000002765
     39        1           0.000003645   -0.000005687   -0.000002463
     40        1           0.000002576   -0.000009443   -0.000001876
     41        1          -0.000000650   -0.000006120    0.000001596
     42        1          -0.000003701    0.000000366    0.000002566
     43        1          -0.000003687    0.000004583    0.000001406
 -------------------------------------------------------------------
 Cartesian Forces:  Max     0.000024790 RMS     0.000005873

 GradGradGradGradGradGradGradGradGradGradGradGradGradGradGradGradGradGrad
 Berny optimization.
 Internal  Forces:  Max     0.000017922 RMS     0.000003909
 Search for a local minimum.
 Step number   1 out of a maximum of  227
 All quantities printed in internal units (Hartrees-Bohrs-Radians)
 Mixed Optimization -- En-DIIS/RFO-DIIS
 Second derivative matrix not updated -- first step.
     Eigenvalues ---    0.00653   0.00802   0.00905   0.01006   0.01286
     Eigenvalues ---    0.01333   0.01517   0.01642   0.01777   0.01897
     Eigenvalues ---    0.01987   0.02036   0.02042   0.02058   0.02088
     Eigenvalues ---    0.02089   0.02095   0.02102   0.02104   0.02120
     Eigenvalues ---    0.02122   0.02125   0.02129   0.02131   0.02139
     Eigenvalues ---    0.02143   0.02144   0.02147   0.02148   0.02152
     Eigenvalues ---    0.02152   0.02157   0.02173   0.02185   0.02194
     Eigenvalues ---    0.02203   0.02211   0.02756   0.06397   0.07332
     Eigenvalues ---    0.11384   0.13886   0.15998   0.15999   0.15999
     Eigenvalues ---    0.15999   0.16000   0.16000   0.16000   0.16000
     Eigenvalues ---    0.16000   0.16000   0.16000   0.16000   0.16000
     Eigenvalues ---    0.16000   0.16000   0.16000   0.22000   0.22000
     Eigenvalues ---    0.22000   0.22000   0.22000   0.22000   0.22019
     Eigenvalues ---    0.22957   0.22964   0.23472   0.24000   0.24000
     Eigenvalues ---    0.24984   0.24998   0.25000   0.25000   0.25000
     Eigenvalues ---    0.25000   0.25000   0.25000   0.31496   0.32663
     Eigenvalues ---    0.33662   0.33918   0.34356   0.34910   0.35019
     Eigenvalues ---    0.35137   0.35202   0.35262   0.35276   0.35276
     Eigenvalues ---    0.35345   0.35351   0.35408   0.35436   0.35461
     Eigenvalues ---    0.35490   0.35521   0.35624   0.37326   0.40889
     Eigenvalues ---    0.40944   0.41419   0.41624   0.41953   0.41973
     Eigenvalues ---    0.42015   0.44626   0.44730   0.44996   0.45279
     Eigenvalues ---    0.45821   0.45930   0.46028   0.46274   0.46355
     Eigenvalues ---    0.46571   0.47573   0.48021   0.52535   0.52791
     Eigenvalues ---    0.54080   0.55118   0.900231000.000001000.00000
     Eigenvalues --- 1000.000001000.000001000.000001000.000001000.00000
     Eigenvalues --- 1000.000001000.000001000.000001000.000001000.00000
     Eigenvalues --- 1000.000001000.000001000.000001000.000001000.00000
     Eigenvalues --- 1000.000001000.000001000.000001000.000001000.00000
     Eigenvalues --- 1000.000001000.000001000.000001000.000001000.00000
     Eigenvalues --- 1000.000001000.000001000.000001000.000001000.00000
     Eigenvalues --- 1000.000001000.000001000.000001000.000001000.00000
     Eigenvalues --- 1000.000001000.000001000.000001000.000001000.00000
     Eigenvalues --- 1000.000001000.000001000.000001000.000001000.00000
     Eigenvalues --- 1000.000001000.000001000.000001000.000001000.00000
     Eigenvalues --- 1000.000001000.000001000.000001000.000001000.00000
     Eigenvalues --- 1000.000001000.000001000.000001000.000001000.00000
     Eigenvalues --- 1000.000001000.000001000.000001000.000001000.00000
     Eigenvalues --- 1000.000001000.000001000.000001000.000001000.00000
     Eigenvalues --- 1000.000001000.000001000.000001000.000001000.00000
     Eigenvalues --- 1000.000001000.000001000.000001000.000001000.00000
     Eigenvalues --- 1000.000001000.000001000.000001000.000001000.00000
     Eigenvalues --- 1000.000001000.000001000.000001000.000001000.00000
     Eigenvalues --- 1000.000001000.00000
 RFO step:  Lambda=-1.92197960D-07 EMin= 6.52810026D-03
 Linear search not attempted -- first point.
 Iteration  1 RMS(Cart)=  0.00096630 RMS(Int)=  0.00000032
 Iteration  2 RMS(Cart)=  0.00000056 RMS(Int)=  0.00000000
 Variable       Old X    -DE/DX   Delta X   Delta X   Delta X     New X
                                 (Linear)    (Quad)   (Total)
    R1        2.61249   0.00000   0.00000   0.00000   0.00000   2.61249
    R2        2.67008   0.00000   0.00000   0.00000   0.00000   2.67008
    R3        2.05109   0.00000   0.00000   0.00000   0.00000   2.05110
    R4        2.65875   0.00000   0.00000   0.00000   0.00000   2.65875
    R5        2.05017   0.00000   0.00000   0.00001   0.00001   2.05018
    R6        2.64568   0.00000   0.00000   0.00000   0.00000   2.64568
    R7        2.57149   0.00000   0.00000   0.00000   0.00000   2.57150
    R8        2.63419   0.00000   0.00000   0.00000   0.00000   2.63419
    R9        2.04674   0.00000   0.00000   0.00001   0.00001   2.04675
   R10        2.65369   0.00000   0.00000   0.00000   0.00000   2.65369
   R11        2.05348   0.00000   0.00000   0.00000   0.00000   2.05349
   R12        2.75357   0.00000   0.00000   0.00000   0.00000   2.75357
   R13        2.70364  -0.00001   0.00000  -0.00002  -0.00002   2.70361
   R14        2.55027   0.00000   0.00000   0.00000   0.00000   2.55027
   R15        2.05822   0.00000   0.00000   0.00000   0.00000   2.05822
   R16        2.80034   0.00000   0.00000  -0.00001  -0.00001   2.80033
   R17        2.04837   0.00000   0.00000  -0.00001  -0.00001   2.04836
   R18        2.82947   0.00001   0.00000   0.00002   0.00002   2.82949
   R19        2.32923  -0.00001   0.00000  -0.00001  -0.00001   2.32922
   R20        2.65447   0.00000   0.00000   0.00001   0.00001   2.65448
   R21        2.65661   0.00000   0.00000   0.00000   0.00000   2.65662
   R22        2.62211   0.00000   0.00000  -0.00001  -0.00001   2.62210
   R23        2.04933   0.00000   0.00000   0.00000   0.00000   2.04934
   R24        2.64913   0.00000   0.00000   0.00000   0.00000   2.64913
   R25        2.05644   0.00000   0.00000   0.00001   0.00001   2.05645
   R26        2.64462   0.00000   0.00000   0.00000   0.00000   2.64462
   R27        2.57390   0.00000   0.00000  -0.00001  -0.00001   2.57389
   R28        2.62622   0.00000   0.00000   0.00000   0.00000   2.62622
   R29        2.04973   0.00000   0.00000   0.00001   0.00001   2.04974
   R30        2.04887   0.00000   0.00000  -0.00001  -0.00001   2.04887
   R31        1.82659   0.00001   0.00000   0.00002   0.00002   1.82661
   R32        2.85075   0.00000   0.00000   0.00001   0.00001   2.85077
   R33        2.07468   0.00000   0.00000   0.00001   0.00001   2.07469
   R34        2.07905   0.00001   0.00000   0.00002   0.00002   2.07906
   R35        2.64681  -0.00001   0.00000  -0.00001  -0.00001   2.64680
   R36        2.64183   0.00000   0.00000   0.00001   0.00001   2.64184
   R37        2.63343   0.00000   0.00000   0.00001   0.00001   2.63344
   R38        2.05118   0.00000   0.00000   0.00000   0.00000   2.05118
   R39        2.64022   0.00000   0.00000  -0.00001  -0.00001   2.64021
   R40        2.05251   0.00000   0.00000   0.00000   0.00000   2.05252
   R41        2.63521   0.00000   0.00000   0.00000   0.00000   2.63522
   R42        2.05229   0.00000   0.00000   0.00001   0.00001   2.05229
   R43        2.63839   0.00000   0.00000   0.00000   0.00000   2.63839
   R44        2.05230   0.00000   0.00000   0.00001   0.00001   2.05230
   R45        2.05453   0.00000   0.00000   0.00001   0.00001   2.05454
    A1        2.11726   0.00000   0.00000   0.00000   0.00000   2.11726
    A2        2.07347   0.00000   0.00000   0.00000   0.00000   2.07347
    A3        2.09246   0.00000   0.00000   0.00000   0.00000   2.09245
    A4        2.10029   0.00000   0.00000   0.00000   0.00000   2.10029
    A5        2.11801   0.00000   0.00000   0.00000   0.00000   2.11801
    A6        2.06489   0.00000   0.00000   0.00000   0.00000   2.06489
    A7        2.08629   0.00000   0.00000   0.00000   0.00000   2.08629
    A8        2.01589   0.00000   0.00000  -0.00001  -0.00001   2.01588
    A9        2.18099   0.00000   0.00000   0.00001   0.00001   2.18100
   A10        2.08303   0.00000   0.00000   0.00000   0.00000   2.08303
   A11        2.11535   0.00000   0.00000   0.00000   0.00000   2.11535
   A12        2.08481   0.00000   0.00000   0.00000   0.00000   2.08481
   A13        2.13175   0.00000   0.00000   0.00000   0.00000   2.13175
   A14        2.07604   0.00000   0.00000   0.00000   0.00000   2.07604
   A15        2.07540   0.00000   0.00000   0.00000   0.00000   2.07540
   A16        2.04776   0.00000   0.00000   0.00000   0.00000   2.04776
   A17        2.15887   0.00000   0.00000  -0.00001  -0.00001   2.15886
   A18        2.07656   0.00000   0.00000   0.00001   0.00001   2.07657
   A19        2.07087   0.00000   0.00000   0.00001   0.00001   2.07089
   A20        2.23856   0.00000   0.00000  -0.00002  -0.00002   2.23854
   A21        2.02643   0.00000   0.00000   0.00001   0.00001   2.02643
   A22        2.01820   0.00000   0.00000   0.00001   0.00001   2.01821
   A23        2.09403   0.00000   0.00000  -0.00002  -0.00002   2.09401
   A24        2.11004   0.00000   0.00000  -0.00003  -0.00003   2.11000
   A25        2.07904   0.00001   0.00000   0.00005   0.00005   2.07910
   A26        2.08263   0.00002   0.00000   0.00006   0.00006   2.08269
   A27        2.11088  -0.00001   0.00000  -0.00006  -0.00006   2.11082
   A28        2.08966   0.00000   0.00000  -0.00001  -0.00001   2.08965
   A29        2.04983  -0.00001   0.00000  -0.00005  -0.00005   2.04978
   A30        2.17322   0.00002   0.00000   0.00007   0.00007   2.17329
   A31        2.06009  -0.00001   0.00000  -0.00002  -0.00002   2.06006
   A32        2.11722   0.00000   0.00000   0.00002   0.00002   2.11724
   A33        2.05595   0.00000   0.00000  -0.00002  -0.00002   2.05593
   A34        2.11001   0.00000   0.00000   0.00000   0.00000   2.11001
   A35        2.09035   0.00000   0.00000   0.00000   0.00000   2.09035
   A36        2.09980   0.00000   0.00000   0.00000   0.00000   2.09980
   A37        2.09303   0.00000   0.00000   0.00000   0.00000   2.09303
   A38        2.09241   0.00000   0.00000  -0.00002  -0.00002   2.09240
   A39        2.14055   0.00000   0.00000   0.00001   0.00001   2.14056
   A40        2.05022   0.00000   0.00000   0.00001   0.00001   2.05023
   A41        2.08952   0.00000   0.00000   0.00001   0.00001   2.08954
   A42        2.07531   0.00000   0.00000   0.00000   0.00000   2.07530
   A43        2.11835   0.00000   0.00000  -0.00001  -0.00001   2.11834
   A44        2.11676   0.00000   0.00000   0.00001   0.00001   2.11676
   A45        2.10601   0.00001   0.00000   0.00004   0.00004   2.10605
   A46        2.06034  -0.00001   0.00000  -0.00004  -0.00004   2.06029
   A47        1.90593   0.00000   0.00000  -0.00003  -0.00003   1.90590
   A48        1.89972   0.00000   0.00000   0.00000   0.00000   1.89973
   A49        1.92293   0.00000   0.00000  -0.00001  -0.00001   1.92292
   A50        1.90360   0.00000   0.00000   0.00001   0.00001   1.90361
   A51        1.92768   0.00000   0.00000   0.00000   0.00000   1.92768
   A52        1.93070   0.00000   0.00000   0.00000   0.00000   1.93071
   A53        1.87914   0.00000   0.00000  -0.00001  -0.00001   1.87913
   A54        2.10481   0.00000   0.00000   0.00001   0.00001   2.10483
   A55        2.09862   0.00000   0.00000  -0.00001  -0.00001   2.09861
   A56        2.07924   0.00000   0.00000   0.00000   0.00000   2.07924
   A57        2.10055   0.00000   0.00000   0.00000   0.00000   2.10055
   A58        2.08309   0.00000   0.00000   0.00000   0.00000   2.08309
   A59        2.09945   0.00000   0.00000   0.00000   0.00000   2.09945
   A60        2.09820   0.00000   0.00000   0.00000   0.00000   2.09820
   A61        2.09016   0.00000   0.00000  -0.00001  -0.00001   2.09015
   A62        2.09483   0.00000   0.00000   0.00000   0.00000   2.09483
   A63        2.08955   0.00000   0.00000   0.00000   0.00000   2.08955
   A64        2.09666   0.00000   0.00000   0.00000   0.00000   2.09666
   A65        2.09697   0.00000   0.00000   0.00000   0.00000   2.09696
   A66        2.09453   0.00000   0.00000   0.00000   0.00000   2.09453
   A67        2.09772   0.00000   0.00000   0.00000   0.00000   2.09772
   A68        2.09090   0.00000   0.00000   0.00000   0.00000   2.09090
   A69        2.10425   0.00000   0.00000   0.00000   0.00000   2.10425
   A70        2.08842   0.00000   0.00000   0.00000   0.00000   2.08842
   A71        2.09052   0.00000   0.00000   0.00000   0.00000   2.09051
    D1        0.00007   0.00000   0.00000   0.00001   0.00001   0.00008
    D2        3.14055   0.00000   0.00000   0.00000   0.00000   3.14054
    D3        3.14137   0.00000   0.00000   0.00000   0.00000   3.14136
    D4       -0.00134   0.00000   0.00000  -0.00002  -0.00002  -0.00136
    D5       -0.00016   0.00000   0.00000   0.00002   0.00002  -0.00013
    D6       -3.14099   0.00000   0.00000   0.00003   0.00003  -3.14095
    D7       -3.14145   0.00000   0.00000   0.00004   0.00004  -3.14141
    D8        0.00091   0.00000   0.00000   0.00005   0.00005   0.00095
    D9        0.00070   0.00000   0.00000  -0.00003  -0.00003   0.00067
   D10        3.13764   0.00000   0.00000  -0.00002  -0.00002   3.13762
   D11       -3.13980   0.00000   0.00000  -0.00002  -0.00002  -3.13982
   D12       -0.00287   0.00000   0.00000  -0.00001  -0.00001  -0.00287
   D13       -0.00138   0.00000   0.00000   0.00002   0.00002  -0.00136
   D14        3.13774   0.00000   0.00000   0.00005   0.00005   3.13779
   D15       -3.13784   0.00000   0.00000   0.00001   0.00001  -3.13784
   D16        0.00127   0.00000   0.00000   0.00004   0.00004   0.00131
   D17        3.11554   0.00001   0.00000   0.00024   0.00024   3.11578
   D18       -0.03099   0.00001   0.00000   0.00025   0.00025  -0.03075
   D19        0.00132   0.00000   0.00000   0.00002   0.00002   0.00134
   D20       -3.14146   0.00000   0.00000  -0.00001  -0.00001  -3.14146
   D21       -3.13784   0.00000   0.00000  -0.00002  -0.00002  -3.13786
   D22        0.00257   0.00000   0.00000  -0.00004  -0.00004   0.00253
   D23       -0.00055   0.00000   0.00000  -0.00004  -0.00004  -0.00058
   D24        3.14032   0.00000   0.00000  -0.00005  -0.00005   3.14027
   D25       -3.14095   0.00000   0.00000  -0.00001  -0.00001  -3.14097
   D26       -0.00009   0.00000   0.00000  -0.00002  -0.00002  -0.00011
   D27        0.00606   0.00001   0.00000   0.00044   0.00044   0.00650
   D28       -3.13587   0.00001   0.00000   0.00041   0.00041  -3.13546
   D29       -3.13476   0.00001   0.00000   0.00045   0.00045  -3.13431
   D30        0.00650   0.00001   0.00000   0.00042   0.00042   0.00692
   D31       -3.09887   0.00000   0.00000  -0.00031  -0.00031  -3.09918
   D32        1.06819   0.00000   0.00000  -0.00031  -0.00031   1.06788
   D33       -0.99089   0.00000   0.00000  -0.00030  -0.00030  -0.99118
   D34       -3.13594   0.00000   0.00000  -0.00002  -0.00002  -3.13596
   D35       -0.00729   0.00000   0.00000   0.00002   0.00002  -0.00727
   D36        0.00599   0.00000   0.00000   0.00001   0.00001   0.00600
   D37        3.13463   0.00000   0.00000   0.00005   0.00005   3.13469
   D38       -3.09819   0.00000   0.00000  -0.00012  -0.00012  -3.09831
   D39        0.05002   0.00000   0.00000   0.00000   0.00000   0.05002
   D40        0.05612   0.00000   0.00000  -0.00016  -0.00016   0.05596
   D41       -3.07885   0.00000   0.00000  -0.00004  -0.00004  -3.07889
   D42       -3.03922   0.00000   0.00000   0.00051   0.00051  -3.03870
   D43        0.11374   0.00000   0.00000   0.00051   0.00051   0.11425
   D44        0.09583   0.00000   0.00000   0.00040   0.00040   0.09623
   D45       -3.03439   0.00000   0.00000   0.00039   0.00039  -3.03400
   D46       -3.13798   0.00000   0.00000   0.00000   0.00000  -3.13798
   D47        0.00347   0.00000   0.00000  -0.00001  -0.00001   0.00346
   D48       -0.00700   0.00000   0.00000   0.00000   0.00000  -0.00700
   D49        3.13445   0.00000   0.00000   0.00000   0.00000   3.13445
   D50        3.13327   0.00000   0.00000  -0.00001  -0.00001   3.13326
   D51        0.00591   0.00000   0.00000   0.00002   0.00002   0.00594
   D52        0.00310   0.00000   0.00000  -0.00002  -0.00002   0.00309
   D53       -3.12425   0.00000   0.00000   0.00002   0.00002  -3.12423
   D54        0.00505   0.00000   0.00000   0.00001   0.00001   0.00506
   D55       -3.13720   0.00000   0.00000   0.00001   0.00001  -3.13719
   D56       -3.13640   0.00000   0.00000   0.00001   0.00001  -3.13639
   D57        0.00454   0.00000   0.00000   0.00001   0.00001   0.00455
   D58        0.00092   0.00000   0.00000   0.00000   0.00000   0.00092
   D59        3.14105   0.00000   0.00000  -0.00001  -0.00001   3.14104
   D60       -3.14002   0.00000   0.00000   0.00000   0.00000  -3.14002
   D61        0.00011   0.00000   0.00000  -0.00001  -0.00001   0.00010
   D62       -0.00473   0.00000   0.00000  -0.00001  -0.00001  -0.00474
   D63        3.13453   0.00000   0.00000  -0.00001  -0.00001   3.13451
   D64        3.13825   0.00000   0.00000  -0.00001  -0.00001   3.13825
   D65       -0.00568   0.00000   0.00000  -0.00001  -0.00001  -0.00569
   D66       -0.00086   0.00000   0.00000   0.00003   0.00003  -0.00083
   D67        3.13931   0.00000   0.00000   0.00002   0.00002   3.13933
   D68        0.00268   0.00000   0.00000   0.00002   0.00002   0.00270
   D69        3.13039   0.00000   0.00000  -0.00001  -0.00001   3.13038
   D70       -3.13652   0.00000   0.00000   0.00002   0.00002  -3.13649
   D71       -0.00880   0.00000   0.00000  -0.00001  -0.00001  -0.00881
   D72        0.80754  -0.00001   0.00000  -0.00201  -0.00201   0.80553
   D73       -2.36886  -0.00001   0.00000  -0.00203  -0.00203  -2.37089
   D74        2.92076  -0.00001   0.00000  -0.00202  -0.00202   2.91874
   D75       -0.25565  -0.00001   0.00000  -0.00204  -0.00204  -0.25768
   D76       -1.28370  -0.00001   0.00000  -0.00203  -0.00203  -1.28573
   D77        1.82308  -0.00001   0.00000  -0.00205  -0.00205   1.82103
   D78        3.10756   0.00000   0.00000  -0.00001  -0.00001   3.10754
   D79       -0.04948   0.00000   0.00000  -0.00001  -0.00001  -0.04948
   D80        0.00039   0.00000   0.00000   0.00001   0.00001   0.00040
   D81        3.12654   0.00000   0.00000   0.00001   0.00001   3.12656
   D82       -3.09900   0.00000   0.00000   0.00001   0.00001  -3.09899
   D83        0.04545   0.00000   0.00000   0.00002   0.00002   0.04547
   D84        0.00829   0.00000   0.00000  -0.00001  -0.00001   0.00828
   D85       -3.13044   0.00000   0.00000   0.00000   0.00000  -3.13045
   D86       -0.00776   0.00000   0.00000   0.00000   0.00000  -0.00776
   D87        3.13540   0.00000   0.00000  -0.00001  -0.00001   3.13539
   D88       -3.13377   0.00000   0.00000   0.00000   0.00000  -3.13378
   D89        0.00940   0.00000   0.00000  -0.00001  -0.00001   0.00938
   D90        0.00646   0.00000   0.00000   0.00000   0.00000   0.00646
   D91       -3.13941   0.00000   0.00000  -0.00001  -0.00001  -3.13942
   D92       -3.13671   0.00000   0.00000   0.00001   0.00001  -3.13670
   D93        0.00060   0.00000   0.00000   0.00000   0.00000   0.00060
   D94        0.00218   0.00000   0.00000   0.00000   0.00000   0.00218
   D95        3.13370   0.00000   0.00000   0.00000   0.00000   3.13370
   D96       -3.13513   0.00000   0.00000   0.00001   0.00001  -3.13512
   D97       -0.00361   0.00000   0.00000   0.00001   0.00001  -0.00361
   D98       -0.00962   0.00000   0.00000   0.00001   0.00001  -0.00961
   D99        3.12912   0.00000   0.00000   0.00000   0.00000   3.12911
   D100      -3.14117   0.00000   0.00000   0.00001   0.00001  -3.14117
   D101      -0.00244   0.00000   0.00000  -0.00001  -0.00001  -0.00244
         Item               Value     Threshold  Converged?
 Maximum Force            0.000018     0.000450     YES
 RMS     Force            0.000004     0.000300     YES
 Maximum Displacement     0.003889     0.001800     NO 
 RMS     Displacement     0.000966     0.001200     YES
 Predicted change in Energy=-9.609898D-08
 GradGradGradGradGradGradGradGradGradGradGradGradGradGradGradGradGradGrad

                          Input orientation:                          
 ---------------------------------------------------------------------
 Center     Atomic      Atomic             Coordinates (Angstroms)
 Number     Number       Type             X           Y           Z
 ---------------------------------------------------------------------
      1          6           0       -0.000008   -0.001056    0.000036
      2          6           0        0.000001   -0.001274    1.382506
      3          6           0        1.214292   -0.000490    2.093140
      4          6           0        2.425202    0.001331    1.390437
      5          6           0        2.406267    0.000688   -0.003391
      6          6           0        1.207163   -0.000149   -0.734233
      7          8           0        1.099578    0.004092    3.449066
      8          6           0        1.267752    0.000895   -2.190100
      9          6           0        0.243747    0.008072   -3.069093
     10          6           0        0.517898    0.000564   -4.525365
     11          6           0       -0.627435    0.065146   -5.487632
     12          6           0       -0.333283   -0.072045   -6.854307
     13          6           0       -1.332517   -0.020486   -7.815652
     14          6           0       -2.664236    0.178071   -7.425386
     15          6           0       -2.979175    0.324300   -6.069674
     16          6           0       -1.968678    0.265946   -5.117386
     17          8           0       -3.690438    0.238945   -8.318903
     18          6           0        2.292306   -0.027245    4.238554
     19          6           0        1.910129   -0.075883    5.697091
     20          6           0        0.918501   -0.957699    6.145229
     21          6           0        0.597844   -1.027316    7.499603
     22          6           0        1.270334   -0.223636    8.423643
     23          6           0        2.259738    0.655429    7.984389
     24          6           0        2.572958    0.731764    6.625947
     25          8           0        1.672189   -0.065071   -4.952601
     26          1           0       -0.951136   -0.001893   -0.522871
     27          1           0       -0.926483   -0.000996    1.946999
     28          1           0        3.375473    0.005493    1.910104
     29          1           0        3.349924    0.001990   -0.542219
     30          1           0        2.264866   -0.004474   -2.628291
     31          1           0       -0.784407    0.007319   -2.725824
     32          1           0        0.703421   -0.220010   -7.136106
     33          1           0       -1.086765   -0.132796   -8.869800
     34          1           0       -4.013877    0.483832   -5.786018
     35          1           0       -2.241755    0.393205   -4.075871
     36          1           0       -3.340596    0.126484   -9.212928
     37          1           0        2.906320    0.859201    4.032295
     38          1           0        2.882622   -0.913794    3.962904
     39          1           0        0.391781   -1.576272    5.425429
     40          1           0       -0.176788   -1.710437    7.835759
     41          1           0        1.020682   -0.280513    9.479053
     42          1           0        2.782166    1.288943    8.695159
     43          1           0        3.336837    1.426809    6.286187
 ---------------------------------------------------------------------
                    Distance matrix (angstroms):
                    1          2          3          4          5
     1  C    0.000000
     2  C    1.382470   0.000000
     3  C    2.419836   1.406949   0.000000
     4  C    2.795508   2.425215   1.400034   0.000000
     5  C    2.406279   2.776839   2.411689   1.393956   0.000000
     6  C    1.412946   2.436766   2.827382   2.449049   1.404273
     7  O    3.620072   2.340891   1.360778   2.448518   3.691464
     8  C    2.530596   3.790872   4.283574   3.762969   2.465343
     9  C    3.078807   4.458277   5.252683   4.964494   3.751677
    10  C    4.554941   5.930528   6.655041   6.215667   4.900428
    11  C    5.523816   6.899049   7.801562   7.525323   6.267728
    12  C    6.862808   8.243857   9.080579   8.694275   7.378718
    13  C    7.928489   9.294197  10.230875   9.943490   8.660854
    14  C    7.890950   9.203765  10.279942  10.180980   8.990411
    15  C    6.769245   8.032215   9.182711   9.217638   8.118344
    16  C    5.489532   6.796742   7.886316   7.856715   6.735241
    17  O    9.103934  10.382407  11.511922  11.477316  10.313793
    18  C    4.818757   3.662287   2.401173   2.851359   4.243567
    19  C    6.009215   4.719089   3.671286   4.338033   5.722544
    20  C    6.286671   4.943878   4.174108   5.079167   6.398240
    21  C    7.593032   6.231296   5.537529   6.459045   7.786019
    22  C    8.521764   7.158267   6.334682   7.130941   8.506207
    23  C    8.323901   7.008747   6.019137   6.628381   8.015908
    24  C    7.145619   5.886520   4.788372   5.288282   6.671609
    25  O    5.227710   6.552394   7.060899   6.387923   5.003786
    26  H    1.085393   2.129583   3.395968   3.880775   3.397356
    27  H    2.156158   1.084908   2.145758   3.397581   3.861508
    28  H    3.878437   3.416462   2.168926   1.083091   2.144957
    29  H    3.393537   3.863491   3.392056   2.142491   1.086658
    30  H    3.469549   4.606096   4.836903   4.021929   2.628711
    31  H    2.836489   4.182553   5.217018   5.219696   4.194293
    32  H    7.174070   8.550403   9.245980   8.701462   7.336486
    33  H    8.937135  10.310584  11.202607  10.845476   9.530599
    34  H    7.058660   8.230084   9.468339   9.653810   8.653928
    35  H    4.668393   5.913963   7.082087   7.198234   6.192195
    36  H    9.800740  11.110316  12.189762  12.070270  10.856235
    37  H    5.044393   4.025977   2.713365   2.819013   4.156183
    38  H    4.984673   3.975003   2.667108   2.768443   4.098132
    39  H    5.663011   4.356529   3.776741   4.785896   6.001420
    40  H    8.021956   6.678096   6.151154   7.158399   8.429258
    41  H    9.537907   8.165405   7.393756   8.214489   9.587266
    42  H    9.220073   7.929691   6.907063   7.425923   8.801458
    43  H    7.258721   6.100818   4.911621   5.179907   6.516023
                    6          7          8          9         10
     6  C    0.000000
     7  O    4.184684   0.000000
     8  C    1.457128   5.641674   0.000000
     9  C    2.525829   6.574105   1.349543   0.000000
    10  C    3.853280   7.995618   2.452701   1.481872   0.000000
    11  C    5.095568   9.102246   3.803890   2.571293   1.497303
    12  C    6.311375  10.402807   4.931882   3.829782   2.480676
    13  C    7.523090  11.524303   6.197475   5.001525   3.774979
    14  C    7.732466  11.508705   6.549820   5.240473   4.309015
    15  C    6.789523  10.360752   5.761256   4.414829   3.836563
    16  C    5.419300   9.103124   4.371926   3.026025   2.569821
    17  O    9.031660  12.707655   7.886859   6.564421   5.670789
    18  C    5.089880   1.430689   6.509846   7.589436   8.941788
    19  C    6.470072   2.391026   7.913680   8.923557  10.317110
    20  C    6.951779   2.868297   8.397535   9.289335  10.721023
    21  C    8.319999   4.209797   9.767105  10.625194  12.069083
    22  C    9.160820   4.982713  10.616118  11.540821  12.972788
    23  C    8.806365   4.726454  10.243666  11.254455  12.647403
    24  C    7.521525   3.576720   8.942059   9.997137  11.362644
    25  O    4.244419   8.421441   2.792728   2.365037   1.232569
    26  H    2.168625   4.470095   2.775451   2.812666   4.263569
    27  H    3.426580   2.522133   4.682976   5.150796   6.631571
    28  H    3.419666   2.747381   4.610225   5.882186   7.041379
    29  H    2.151348   4.581966   2.655363   4.004181   4.887312
    30  H    2.169380   6.188072   1.089163   2.068668   2.578917
    31  H    2.816531   6.455903   2.120943   1.083944   2.221349
    32  H    6.425424  10.594953   4.982995   4.099258   2.626602
    33  H    8.453825  12.512126   7.083785   5.953008   4.633233
    34  H    7.281074  10.567136   6.407766   5.073006   4.728613
    35  H    4.818331   8.242608   4.003334   2.709179   2.823455
    36  H    9.622183  13.418503   8.400759   7.113947   6.072650
    37  H    5.132778   2.082230   6.491517   7.631738   8.926106
    38  H    5.070010   2.070215   6.426813   7.567198   8.858819
    39  H    6.410184   2.627649   7.826307   8.642278  10.075745
    40  H    8.847890   4.879733  10.272935  11.047439  12.498300
    41  H   10.218835   6.037216  11.675161  12.575488  14.016260
    42  H    9.646545   5.657158  11.065323  12.102968  13.474757
    43  H    7.473822   3.883131   8.840915   9.954963  11.263669
                   11         12         13         14         15
    11  C    0.000000
    12  C    1.404688   0.000000
    13  C    2.433958   1.387556   0.000000
    14  C    2.813574   2.412888   1.401858   0.000000
    15  C    2.436516   2.788096   2.424623   1.399473   0.000000
    16  C    1.405822   2.409491   2.787002   2.412133   1.389734
    17  O    4.174720   3.675901   2.424945   1.362046   2.360553
    18  C   10.155398  11.399443  12.587425  12.675053  11.583249
    19  C   11.469837  12.750314  13.896476  13.899235  12.748420
    20  C   11.779626  13.089664  14.172215  14.081463  12.885623
    21  C   13.090571  14.415764  15.469229  15.324798  14.097773
    22  C   14.043094  15.362627  16.447820  16.335052  15.113398
    23  C   13.790561  15.081110  16.217351  16.184393  15.002418
    24  C   12.546939  13.813384  14.979265  15.005823  13.862575
    25  O    2.364633   2.763776   4.150580   4.997836   4.799443
    26  H    4.975754   6.361898   7.302770   7.114198   5.914927
    27  H    7.440937   8.821560   9.771110   9.533806   8.281691
    28  H    8.411499   9.517131  10.805377  11.120217  10.205882
    29  H    6.346691   7.308485   8.650352   9.142161   8.409170
    30  H    4.067688   4.961266   6.312696   6.880515   6.281017
    31  H    2.766869   4.153815   5.119330   5.064464   4.012333
    32  H    2.137747   1.084463   2.155606   3.403420   3.872346
    33  H    3.418951   2.152588   1.088225   2.161338   3.410404
    34  H    3.425247   3.872597   3.400506   2.145355   1.084675
    35  H    2.169498   3.402709   3.870894   3.382902   2.126920
    36  H    4.608995   3.827066   2.450787   1.911917   3.170142
    37  H   10.185625  11.396506  12.614097  12.758272  11.703630
    38  H   10.128744  11.316476  12.541921  12.714282  11.685297
    39  H   11.082778  12.392754  13.443211  13.325180  12.129012
    40  H   13.448737  14.781977  15.784749  15.577433  14.330199
    41  H   15.061124  16.390709  17.456002  17.307484  16.066350
    42  H   14.638122  15.916790  17.066110  17.051959  15.878409
    43  H   12.497695  13.725484  14.925126  15.019303  13.920303
                   16         17         18         19         20
    16  C    0.000000
    17  O    3.635230   0.000000
    18  C   10.284725  13.912362   0.000000
    19  C   11.494125  15.096806   1.508561   0.000000
    20  C   11.691006  15.227784   2.527547   1.400626   0.000000
    21  C   12.940169  16.438306   3.808645   2.424121   1.393555
    22  C   13.931632  17.468144   4.312535   2.804506   2.419463
    23  C   13.772717  17.360167   3.807675   2.426680   2.789912
    24  C   12.599576  16.211771   2.520814   1.398002   2.413007
    25  O    3.659596   6.338943   9.212128  10.652355  11.159151
    26  H    4.713459   8.266794   5.761226   6.846915   6.990900
    27  H    7.145836  10.634179   3.951268   4.702677   4.684484
    28  H    8.832520  12.434395   2.568269   4.061419   4.990064
    29  H    7.020638  10.492838   4.896448   6.403754   7.180166
    30  H    4.918498   8.240629   6.866938   8.333242   8.927261
    31  H    2.681223   6.307234   7.613798   8.843809   9.084424
    32  H    3.384006   4.573363  11.486714  12.890611  13.303545
    33  H    3.875225   2.687153  13.537289  14.872085  15.170783
    34  H    2.162725   2.565168  11.854163  12.933249  12.990806
    35  H    1.084214   4.486179   9.479670  10.628686  10.783462
    36  H    4.321466   0.966601  14.584086  15.808850  15.974616
    37  H   10.384327  14.016206   1.097881   2.153677   3.423016
    38  H   10.362363  13.977722   1.100193   2.157601   2.936365
    39  H   10.959768  14.452204   2.723996   2.151824   1.085439
    40  H   13.225012  16.646889   4.676478   3.406008   2.150387
    41  H   14.909425  18.418245   5.398519   3.890531   3.403440
    42  H   14.642522  18.233908   4.672648   3.407581   3.875924
    43  H   12.630819  16.251223   2.719948   2.154208   3.399132
                   21         22         23         24         25
    21  C    0.000000
    22  C    1.397138   0.000000
    23  C    2.414237   1.394496   0.000000
    24  C    2.785447   2.416884   1.396173   0.000000
    25  O   12.535450  13.383217  12.970352  11.640837   0.000000
    26  H    8.234739   9.220857   9.116758   8.003942   5.148624
    27  H    5.848787   6.842696   6.858060   5.888597   7.373037
    28  H    6.326485   6.849109   6.210010   4.838458   7.071270
    29  H    8.561793   9.206643   8.620820   7.246989   4.719190
    30  H   10.315008  11.098755  10.633178   9.288589   2.399448
    31  H   10.370171  11.339573  11.153275   9.962547   3.316419
    32  H   14.658337  15.570073  15.225567  13.921032   2.393786
    33  H   16.480152  17.453576  17.201281  15.945507   4.791750
    34  H   14.144231  15.176886  15.133136  14.053638   5.772974
    35  H   12.003033  12.998196  12.875639  11.739888   4.037033
    36  H   17.209045  18.232714  18.093956  16.917636   6.581420
    37  H    4.572770   4.809669   4.009818   2.618090   9.116233
    38  H    4.212046   4.793118   4.361512   3.145719   9.037239
    39  H    2.155460   3.404521   3.875310   3.394968  10.565353
    40  H    1.086145   2.156466   3.399423   3.871575  13.025670
    41  H    2.157483   1.086026   2.155288   3.402129  14.447959
    42  H    3.400834   2.155749   1.086032   2.153104  13.759606
    43  H    3.872621   3.400459   2.153848   1.087215  11.458931
                   26         27         28         29         30
    26  H    0.000000
    27  H    2.469993   0.000000
    28  H    4.963765   4.302119   0.000000
    29  H    4.301105   4.948118   2.452458   0.000000
    30  H    3.843887   5.578351   4.672320   2.351402   0.000000
    31  H    2.209273   4.674990   6.228678   4.675559   3.050855
    32  H    6.820558   9.230783   9.435286   7.108629   4.775454
    33  H    8.349057  10.818789  11.667776   9.436683   7.085642
    34  H    6.108766   8.340660  10.679962   9.052909   7.045019
    35  H    3.800738   6.177402   8.217996   6.626207   4.750081
    36  H    9.013494  11.418763  12.993923  10.952613   8.648456
    37  H    6.030837   4.447334   2.335084   4.675230   6.746911
    38  H    5.970883   4.405264   2.302603   4.620948   6.682240
    39  H    6.297966   4.039653   4.874619   6.845023   8.416734
    40  H    8.566530   6.177518   7.118733   9.249898  10.879721
    41  H   10.198245   7.784692   7.931950  10.292282  12.174234
    42  H   10.028753   7.807412   6.930818   9.343862  11.408814
    43  H    8.172587   6.248446   4.601275   6.975486   9.092063
                   31         32         33         34         35
    31  H    0.000000
    32  H    4.660032   0.000000
    33  H    6.153006   2.493605   0.000000
    34  H    4.474520   4.956917   4.296268   0.000000
    35  H    2.023709   4.291286   4.959076   2.464393   0.000000
    36  H    6.973579   4.559311   2.294497   3.510657   5.260033
    37  H    7.747216  11.434625  13.542261  12.017875   9.615726
    38  H    7.683400  11.332179  13.455270  12.023167   9.622338
    39  H    8.386544  12.638384  14.443798  12.220901  10.054306
    40  H   10.717599  15.071592  16.804544  14.320994  12.270954
    41  H   12.340998  16.618298  18.470072  16.092030  13.958273
    42  H   12.033365  16.038300  18.042110  16.016832  13.752866
    43  H   10.010792  13.776967  15.865199  14.165463  11.813605
                   36         37         38         39         40
    36  H    0.000000
    37  H   14.662768   0.000000
    38  H   14.608667   1.774511   0.000000
    39  H   15.202353   3.767659   2.963468   0.000000
    40  H   17.436791   5.529460   4.999364   2.480113   0.000000
    41  H   19.198348   5.875521   5.856259   4.301904   2.485767
    42  H   18.961516   4.684271   5.220764   4.961303   4.300030
    43  H   16.926355   2.363800   3.329020   4.293338   4.958735
                   41         42         43
    41  H    0.000000
    42  H    2.486063   0.000000
    43  H    4.298130   2.475846   0.000000
 Stoichiometry    C22H18O3
 Framework group  C1[X(C22H18O3)]
 Deg. of freedom   123
 Full point group                 C1      NOp   1
 Largest Abelian subgroup         C1      NOp   1
 Largest concise Abelian subgroup C1      NOp   1
                         Standard orientation:                         
 ---------------------------------------------------------------------
 Center     Atomic      Atomic             Coordinates (Angstroms)
 Number     Number       Type             X           Y           Z
 ---------------------------------------------------------------------
      1          6           0       -0.223873   -0.465595   -0.025561
      2          6           0       -1.565341   -0.797733   -0.062600
      3          6           0       -2.547879    0.208651   -0.026319
      4          6           0       -2.158171    1.551360    0.046859
      5          6           0       -0.801129    1.867837    0.084187
      6          6           0        0.197352    0.881028    0.049207
      7          8           0       -3.835837   -0.228070   -0.072746
      8          6           0        1.595431    1.289582    0.090203
      9          6           0        2.695539    0.508509    0.059319
     10          6           0        4.042352    1.123738    0.118753
     11          6           0        5.253400    0.248014    0.027174
     12          6           0        6.506503    0.854435    0.214616
     13          6           0        7.681209    0.119442    0.142780
     14          6           0        7.626827   -1.255007   -0.127661
     15          6           0        6.389514   -1.878480   -0.324795
     16          6           0        5.220776   -1.130743   -0.245408
     17          8           0        8.742364   -2.031960   -0.211875
     18          6           0       -4.890168    0.736815   -0.007513
     19          6           0       -6.213956    0.013441   -0.015944
     20          6           0       -6.422761   -1.100803    0.806623
     21          6           0       -7.660633   -1.740597    0.824795
     22          6           0       -8.707472   -1.269390    0.028499
     23          6           0       -8.506794   -0.159578   -0.791662
     24          6           0       -7.263077    0.474329   -0.816778
     25          8           0        4.177413    2.341915    0.249245
     26          1           0        0.513007   -1.261986   -0.054665
     27          1           0       -1.889535   -1.831423   -0.120981
     28          1           0       -2.891651    2.347869    0.072691
     29          1           0       -0.505958    2.912088    0.141095
     30          1           0        1.779951    2.361131    0.153534
     31          1           0        2.610523   -0.570638    0.003222
     32          1           0        6.527578    1.919456    0.417957
     33          1           0        8.643106    0.605143    0.294714
     34          1           0        6.366327   -2.941411   -0.539644
     35          1           0        4.277954   -1.639127   -0.413195
     36          1           0        9.523770   -1.483836   -0.059287
     37          1           0       -4.824885    1.427146   -0.858702
     38          1           0       -4.778430    1.329671    0.912520
     39          1           0       -5.606500   -1.470257    1.419321
     40          1           0       -7.810156   -2.607375    1.462015
     41          1           0       -9.672192   -1.767874    0.045295
     42          1           0       -9.313033    0.208653   -1.419236
     43          1           0       -7.107284    1.332163   -1.466305
 ---------------------------------------------------------------------
 Rotational constants (GHZ):      0.9059815      0.0487982      0.0467112
 Standard basis: 6-31G(d,p) (6D, 7F)
 There are   465 symmetry adapted basis functions of A   symmetry.
 Integral buffers will be    262144 words long.
 Raffenetti 2 integral format.
 Two-electron integral symmetry is turned on.
   465 basis functions,   826 primitive gaussians,   465 cartesian basis functions
    87 alpha electrons       87 beta electrons
       nuclear repulsion energy      1771.9586675403 Hartrees.
 NAtoms=   43 NActive=   43 NUniq=   43 SFac= 7.50D-01 NAtFMM=   80 NAOKFM=F Big=F
 One-electron integrals computed using PRISM.
 NBasis=   465 RedAO= T  NBF=   465
 NBsUse=   465 1.00D-06 NBFU=   465
 Initial guess read from the read-write file.
 B after Tr=     0.000000    0.000000    0.000000
         Rot=    1.000000    0.000000    0.000000    0.000000 Ang=   0.00 deg.
 Initial guess orbital symmetries:
       Occupied  (A) (A) (A) (A) (A) (A) (A) (A) (A) (A) (A) (A)
                 (A) (A) (A) (A) (A) (A) (A) (A) (A) (A) (A) (A)
                 (A) (A) (A) (A) (A) (A) (A) (A) (A) (A) (A) (A)
                 (A) (A) (A) (A) (A) (A) (A) (A) (A) (A) (A) (A)
                 (A) (A) (A) (A) (A) (A) (A) (A) (A) (A) (A) (A)
                 (A) (A) (A) (A) (A) (A) (A) (A) (A) (A) (A) (A)
                 (A) (A) (A) (A) (A) (A) (A) (A) (A) (A) (A) (A)
                 (A) (A) (A)
       Virtual   (A) (A) (A) (A) (A) (A) (A) (A) (A) (A) (A) (A)
                 (A) (A) (A) (A) (A) (A) (A) (A) (A) (A) (A) (A)
                 (A) (A) (A) (A) (A) (A) (A) (A) (A) (A) (A) (A)
                 (A) (A) (A) (A) (A) (A) (A) (A) (A) (A) (A) (A)
                 (A) (A) (A) (A) (A) (A) (A) (A) (A) (A) (A) (A)
                 (A) (A) (A) (A) (A) (A) (A) (A) (A) (A) (A) (A)
                 (A) (A) (A) (A) (A) (A) (A) (A) (A) (A) (A) (A)
                 (A) (A) (A) (A) (A) (A) (A) (A) (A) (A) (A) (A)
                 (A) (A) (A) (A) (A) (A) (A) (A) (A) (A) (A) (A)
                 (A) (A) (A) (A) (A) (A) (A) (A) (A) (A) (A) (A)
                 (A) (A) (A) (A) (A) (A) (A) (A) (A) (A) (A) (A)
                 (A) (A) (A) (A) (A) (A) (A) (A) (A) (A) (A) (A)
                 (A) (A) (A) (A) (A) (A) (A) (A) (A) (A) (A) (A)
                 (A) (A) (A) (A) (A) (A) (A) (A) (A) (A) (A) (A)
                 (A) (A) (A) (A) (A) (A) (A) (A) (A) (A) (A) (A)
                 (A) (A) (A) (A) (A) (A) (A) (A) (A) (A) (A) (A)
                 (A) (A) (A) (A) (A) (A) (A) (A) (A) (A) (A) (A)
                 (A) (A) (A) (A) (A) (A) (A) (A) (A) (A) (A) (A)
                 (A) (A) (A) (A) (A) (A) (A) (A) (A) (A) (A) (A)
                 (A) (A) (A) (A) (A) (A) (A) (A) (A) (A) (A) (A)
                 (A) (A) (A) (A) (A) (A) (A) (A) (A) (A) (A) (A)
                 (A) (A) (A) (A) (A) (A) (A) (A) (A) (A) (A) (A)
                 (A) (A) (A) (A) (A) (A) (A) (A) (A) (A) (A) (A)
                 (A) (A) (A) (A) (A) (A) (A) (A) (A) (A) (A) (A)
                 (A) (A) (A) (A) (A) (A) (A) (A) (A) (A) (A) (A)
                 (A) (A) (A) (A) (A) (A) (A) (A) (A) (A) (A) (A)
                 (A) (A) (A) (A) (A) (A) (A) (A) (A) (A) (A) (A)
                 (A) (A) (A) (A) (A) (A) (A) (A) (A) (A) (A) (A)
                 (A) (A) (A) (A) (A) (A) (A) (A) (A) (A) (A) (A)
                 (A) (A) (A) (A) (A) (A) (A) (A) (A) (A) (A) (A)
                 (A) (A) (A) (A) (A) (A) (A) (A) (A) (A) (A) (A)
                 (A) (A) (A) (A) (A) (A)
 Requested convergence on RMS density matrix=1.00D-08 within 128 cycles.
 Requested convergence on MAX density matrix=1.00D-06.
 Requested convergence on             energy=1.00D-06.
 No special actions if energy rises.
 SCF Done:  E(RB3LYP) =  -1074.86483214     A.U. after    7 cycles
             Convg  =    0.4063D-08             -V/T =  2.0095
 Calling FoFJK, ICntrl=      2127 FMM=F ISym2X=0 I1Cent= 0 IOpClX= 0 NMat=1 NMatS=1 NMatT=0.
 ***** Axes restored to original set *****
 -------------------------------------------------------------------
 Center     Atomic                   Forces (Hartrees/Bohr)
 Number     Number              X              Y              Z
 -------------------------------------------------------------------
      1        6          -0.000000666   -0.000004024   -0.000000174
      2        6           0.000000470   -0.000000612    0.000000823
      3        6          -0.000000244    0.000008405   -0.000002919
      4        6          -0.000000987    0.000003788    0.000002346
      5        6          -0.000001050    0.000007513   -0.000000285
      6        6           0.000000280    0.000003920    0.000001455
      7        8           0.000015794   -0.000021377    0.000004486
      8        6           0.000002378    0.000002861   -0.000000264
      9        6          -0.000003169    0.000007759   -0.000003365
     10        6           0.000002219   -0.000004049   -0.000002497
     11        6          -0.000002112    0.000001950    0.000003934
     12        6           0.000000772    0.000001828   -0.000002872
     13        6           0.000002187    0.000001662    0.000000860
     14        6          -0.000001578   -0.000002584   -0.000001926
     15        6           0.000000597   -0.000004897   -0.000000286
     16        6           0.000005311   -0.000002501    0.000000456
     17        8           0.000000601   -0.000004556    0.000001026
     18        6          -0.000014579    0.000008886   -0.000010005
     19        6          -0.000019660   -0.000009658    0.000004569
     20        6          -0.000008224    0.000004504   -0.000007327
     21        6           0.000008242   -0.000001031    0.000007803
     22        6          -0.000005958   -0.000010695    0.000001342
     23        6           0.000000921   -0.000002430   -0.000005667
     24        6           0.000012021   -0.000009670    0.000004093
     25        8           0.000000982    0.000012769   -0.000001666
     26        1           0.000000185   -0.000005630    0.000000293
     27        1          -0.000000464   -0.000005856   -0.000000417
     28        1           0.000000003    0.000005943    0.000001107
     29        1           0.000000092    0.000008349    0.000000585
     30        1          -0.000000325    0.000004415    0.000000677
     31        1          -0.000003947    0.000000180   -0.000000696
     32        1           0.000001506    0.000007720   -0.000000110
     33        1           0.000001531    0.000002531   -0.000000323
     34        1          -0.000000642   -0.000007655    0.000000540
     35        1           0.000000190   -0.000003458    0.000004598
     36        1           0.000000809   -0.000003587   -0.000001375
     37        1          -0.000010308    0.000010054   -0.000003256
     38        1           0.000016506    0.000007878    0.000003186
     39        1           0.000006473   -0.000000055    0.000000597
     40        1           0.000003661   -0.000008511   -0.000002365
     41        1          -0.000000411   -0.000005542   -0.000000095
     42        1          -0.000004750   -0.000000200    0.000000866
     43        1          -0.000004655    0.000005660    0.000002250
 -------------------------------------------------------------------
 Cartesian Forces:  Max     0.000021377 RMS     0.000005675

 GradGradGradGradGradGradGradGradGradGradGradGradGradGradGradGradGradGrad
 Berny optimization.
 Using GEDIIS/GDIIS optimizer.
 Internal  Forces:  Max     0.000017685 RMS     0.000003806
 Search for a local minimum.
 Step number   2 out of a maximum of  227
 All quantities printed in internal units (Hartrees-Bohrs-Radians)
 Mixed Optimization -- En-DIIS/RFO-DIIS
 Swaping is turned off.
 Update second derivatives using D2CorX and points    1    2
 DE= -2.09D-08 DEPred=-9.61D-08 R= 2.18D-01
 Trust test= 2.18D-01 RLast= 5.17D-03 DXMaxT set to 3.00D-01
     Eigenvalues ---    0.00064   0.00807   0.00957   0.01009   0.01290
     Eigenvalues ---    0.01309   0.01543   0.01643   0.01777   0.01899
     Eigenvalues ---    0.01986   0.02036   0.02042   0.02061   0.02088
     Eigenvalues ---    0.02089   0.02096   0.02104   0.02118   0.02120
     Eigenvalues ---    0.02123   0.02127   0.02129   0.02136   0.02139
     Eigenvalues ---    0.02144   0.02145   0.02148   0.02150   0.02152
     Eigenvalues ---    0.02156   0.02159   0.02173   0.02185   0.02191
     Eigenvalues ---    0.02195   0.02203   0.02760   0.06397   0.07352
     Eigenvalues ---    0.11384   0.13888   0.15992   0.15999   0.15999
     Eigenvalues ---    0.15999   0.16000   0.16000   0.16000   0.16000
     Eigenvalues ---    0.16000   0.16000   0.16000   0.16000   0.16000
     Eigenvalues ---    0.16000   0.16000   0.16366   0.21981   0.22000
     Eigenvalues ---    0.22000   0.22000   0.22000   0.22008   0.22152
     Eigenvalues ---    0.22957   0.22982   0.23473   0.24000   0.24037
     Eigenvalues ---    0.24875   0.24998   0.24999   0.25000   0.25000
     Eigenvalues ---    0.25000   0.25000   0.31243   0.31738   0.33636
     Eigenvalues ---    0.33898   0.34324   0.34472   0.34924   0.35045
     Eigenvalues ---    0.35135   0.35205   0.35264   0.35276   0.35280
     Eigenvalues ---    0.35350   0.35392   0.35418   0.35439   0.35462
     Eigenvalues ---    0.35504   0.35622   0.37264   0.38466   0.40901
     Eigenvalues ---    0.41089   0.41621   0.41886   0.41971   0.41998
     Eigenvalues ---    0.42872   0.44627   0.44753   0.45198   0.45282
     Eigenvalues ---    0.45798   0.45937   0.46044   0.46279   0.46444
     Eigenvalues ---    0.46660   0.47606   0.48023   0.52556   0.52816
     Eigenvalues ---    0.54731   0.55266   0.902031000.000001000.00000
     Eigenvalues --- 1000.000001000.000001000.000001000.000001000.00000
     Eigenvalues --- 1000.000001000.000001000.000001000.000001000.00000
     Eigenvalues --- 1000.000001000.000001000.000001000.000001000.00000
     Eigenvalues --- 1000.000001000.000001000.000001000.000001000.00000
     Eigenvalues --- 1000.000001000.000001000.000001000.000001000.00000
     Eigenvalues --- 1000.000001000.000001000.000001000.000001000.00000
     Eigenvalues --- 1000.000001000.000001000.000001000.000001000.00000
     Eigenvalues --- 1000.000001000.000001000.000001000.000001000.00000
     Eigenvalues --- 1000.000001000.000001000.000001000.000001000.00000
     Eigenvalues --- 1000.000001000.000001000.000001000.000001000.00000
     Eigenvalues --- 1000.000001000.000001000.000001000.000001000.00000
     Eigenvalues --- 1000.000001000.000001000.000001000.000001000.00000
     Eigenvalues --- 1000.000001000.000001000.000001000.000001000.00000
     Eigenvalues --- 1000.000001000.000001000.000001000.000001000.00000
     Eigenvalues --- 1000.000001000.000001000.000001000.000001000.00000
     Eigenvalues --- 1000.000001000.000001000.000001000.000001000.00000
     Eigenvalues --- 1000.000001000.000001000.000001000.000001000.00000
     Eigenvalues --- 1000.000001000.000001000.000001000.000001000.00000
     Eigenvalues --- 1000.000001000.00000
 En-DIIS/RFO-DIIS IScMMF=        0 using points:     2    1
 RFO step:  Lambda=-4.52293676D-08.
 DIIS coeffs:      5.95036     -4.95036
 Iteration  1 RMS(Cart)=  0.00922836 RMS(Int)=  0.00003035
 Iteration  2 RMS(Cart)=  0.00005213 RMS(Int)=  0.00000005
 Iteration  3 RMS(Cart)=  0.00000000 RMS(Int)=  0.00000005
 Variable       Old X    -DE/DX   Delta X   Delta X   Delta X     New X
                                  (DIIS)     (GDIIS)  (Total)
    R1        2.61249   0.00000  -0.00001   0.00000  -0.00002   2.61247
    R2        2.67008   0.00000  -0.00002   0.00001  -0.00001   2.67007
    R3        2.05110   0.00000   0.00002  -0.00001   0.00001   2.05111
    R4        2.65875   0.00000  -0.00001  -0.00001  -0.00002   2.65873
    R5        2.05018   0.00000   0.00003   0.00000   0.00003   2.05021
    R6        2.64568   0.00000   0.00001  -0.00003  -0.00002   2.64566
    R7        2.57150   0.00000   0.00002  -0.00001   0.00001   2.57151
    R8        2.63419   0.00000   0.00001   0.00001   0.00002   2.63421
    R9        2.04675   0.00000   0.00003   0.00001   0.00003   2.04678
   R10        2.65369   0.00000  -0.00002   0.00000  -0.00002   2.65367
   R11        2.05349   0.00000   0.00002   0.00000   0.00002   2.05350
   R12        2.75357   0.00000  -0.00001   0.00003   0.00002   2.75359
   R13        2.70361  -0.00002  -0.00012  -0.00021  -0.00033   2.70328
   R14        2.55027   0.00000  -0.00001   0.00002   0.00001   2.55028
   R15        2.05822   0.00000   0.00002  -0.00001   0.00000   2.05822
   R16        2.80033   0.00000  -0.00003  -0.00001  -0.00004   2.80029
   R17        2.04836   0.00000  -0.00005   0.00007   0.00002   2.04838
   R18        2.82949  -0.00001   0.00011  -0.00015  -0.00005   2.82945
   R19        2.32922   0.00000  -0.00004   0.00001  -0.00003   2.32919
   R20        2.65448   0.00000   0.00004   0.00001   0.00005   2.65453
   R21        2.65662  -0.00001   0.00002  -0.00009  -0.00006   2.65656
   R22        2.62210   0.00000  -0.00003  -0.00001  -0.00003   2.62207
   R23        2.04934   0.00000   0.00002   0.00000   0.00002   2.04936
   R24        2.64913   0.00000   0.00000   0.00002   0.00002   2.64915
   R25        2.05645   0.00000   0.00004   0.00000   0.00004   2.05649
   R26        2.64462   0.00000   0.00001   0.00002   0.00003   2.64465
   R27        2.57389   0.00000  -0.00003   0.00000  -0.00003   2.57386
   R28        2.62622   0.00000  -0.00001   0.00000  -0.00001   2.62621
   R29        2.04974   0.00000   0.00003   0.00000   0.00003   2.04977
   R30        2.04887   0.00000  -0.00003   0.00007   0.00005   2.04892
   R31        1.82661   0.00000   0.00012   0.00000   0.00012   1.82673
   R32        2.85077   0.00001   0.00007   0.00015   0.00022   2.85099
   R33        2.07469   0.00000   0.00005   0.00003   0.00008   2.07477
   R34        2.07906   0.00000   0.00008   0.00005   0.00013   2.07919
   R35        2.64680   0.00000  -0.00006  -0.00005  -0.00011   2.64669
   R36        2.64184   0.00000   0.00004   0.00003   0.00007   2.64191
   R37        2.63344   0.00001   0.00004   0.00007   0.00011   2.63354
   R38        2.05118  -0.00001   0.00002  -0.00009  -0.00007   2.05111
   R39        2.64021   0.00000  -0.00004  -0.00006  -0.00010   2.64011
   R40        2.05252   0.00000   0.00002   0.00000   0.00002   2.05254
   R41        2.63522   0.00000   0.00001   0.00003   0.00004   2.63526
   R42        2.05229   0.00000   0.00003   0.00000   0.00002   2.05232
   R43        2.63839   0.00000  -0.00002  -0.00006  -0.00007   2.63831
   R44        2.05230   0.00000   0.00003   0.00000   0.00002   2.05232
   R45        2.05454   0.00000   0.00003   0.00002   0.00005   2.05459
    A1        2.11726   0.00000   0.00001   0.00000   0.00001   2.11726
    A2        2.07347   0.00000   0.00001  -0.00001  -0.00001   2.07347
    A3        2.09245   0.00000  -0.00002   0.00002   0.00000   2.09245
    A4        2.10029   0.00000   0.00000  -0.00001  -0.00001   2.10028
    A5        2.11801   0.00000   0.00000  -0.00001  -0.00001   2.11800
    A6        2.06489   0.00000   0.00000   0.00002   0.00002   2.06491
    A7        2.08629   0.00000  -0.00001   0.00003   0.00002   2.08631
    A8        2.01588   0.00000  -0.00005   0.00002  -0.00003   2.01585
    A9        2.18100   0.00000   0.00006  -0.00005   0.00001   2.18102
   A10        2.08303   0.00000   0.00001  -0.00002  -0.00001   2.08302
   A11        2.11535   0.00000  -0.00001  -0.00001  -0.00002   2.11533
   A12        2.08481   0.00000   0.00000   0.00003   0.00003   2.08484
   A13        2.13175   0.00000  -0.00002   0.00001  -0.00001   2.13174
   A14        2.07604   0.00000  -0.00001  -0.00001  -0.00002   2.07602
   A15        2.07540   0.00000   0.00002   0.00000   0.00003   2.07543
   A16        2.04776   0.00000   0.00001   0.00000   0.00000   2.04776
   A17        2.15886   0.00000  -0.00006  -0.00001  -0.00007   2.15879
   A18        2.07657   0.00000   0.00006   0.00001   0.00007   2.07664
   A19        2.07089   0.00000   0.00007   0.00000   0.00007   2.07095
   A20        2.23854   0.00000  -0.00010  -0.00004  -0.00014   2.23840
   A21        2.02643   0.00000   0.00004   0.00001   0.00005   2.02649
   A22        2.01821   0.00000   0.00006   0.00003   0.00008   2.01830
   A23        2.09401   0.00000  -0.00009   0.00013   0.00004   2.09405
   A24        2.11000   0.00000  -0.00017   0.00003  -0.00014   2.10987
   A25        2.07910   0.00000   0.00026  -0.00016   0.00010   2.07920
   A26        2.08269  -0.00002   0.00032  -0.00045  -0.00013   2.08256
   A27        2.11082   0.00001  -0.00027   0.00029   0.00001   2.11084
   A28        2.08965   0.00001  -0.00005   0.00017   0.00012   2.08978
   A29        2.04978   0.00001  -0.00023   0.00022  -0.00002   2.04977
   A30        2.17329  -0.00001   0.00036  -0.00031   0.00004   2.17333
   A31        2.06006   0.00000  -0.00012   0.00009  -0.00003   2.06004
   A32        2.11724   0.00000   0.00009  -0.00006   0.00003   2.11727
   A33        2.05593   0.00000  -0.00009   0.00003  -0.00006   2.05587
   A34        2.11001   0.00000   0.00000   0.00003   0.00003   2.11004
   A35        2.09035   0.00000   0.00001   0.00000   0.00001   2.09036
   A36        2.09980   0.00000   0.00000  -0.00001  -0.00001   2.09979
   A37        2.09303   0.00000   0.00000   0.00001   0.00000   2.09304
   A38        2.09240   0.00000  -0.00008   0.00000  -0.00007   2.09232
   A39        2.14056   0.00000   0.00004   0.00000   0.00004   2.14060
   A40        2.05023   0.00000   0.00003   0.00000   0.00003   2.05026
   A41        2.08954   0.00000   0.00006   0.00000   0.00006   2.08960
   A42        2.07530   0.00000  -0.00002   0.00002   0.00001   2.07531
   A43        2.11834   0.00000  -0.00005  -0.00002  -0.00007   2.11827
   A44        2.11676   0.00000   0.00003  -0.00004  -0.00001   2.11675
   A45        2.10605   0.00000   0.00018  -0.00008   0.00011   2.10615
   A46        2.06029   0.00000  -0.00022   0.00012  -0.00010   2.06019
   A47        1.90590   0.00000  -0.00013   0.00003  -0.00010   1.90580
   A48        1.89973   0.00001   0.00002   0.00028   0.00030   1.90003
   A49        1.92292   0.00000  -0.00003  -0.00005  -0.00008   1.92284
   A50        1.90361   0.00000   0.00006   0.00006   0.00012   1.90373
   A51        1.92768   0.00000  -0.00001  -0.00004  -0.00005   1.92763
   A52        1.93071   0.00000   0.00002  -0.00009  -0.00007   1.93064
   A53        1.87913   0.00000  -0.00005  -0.00018  -0.00023   1.87890
   A54        2.10483   0.00002   0.00007   0.00036   0.00043   2.10526
   A55        2.09861  -0.00002  -0.00006  -0.00038  -0.00044   2.09816
   A56        2.07924   0.00000  -0.00001   0.00000  -0.00002   2.07922
   A57        2.10055   0.00000   0.00001  -0.00004  -0.00003   2.10052
   A58        2.08309   0.00000  -0.00002  -0.00005  -0.00007   2.08302
   A59        2.09945   0.00000   0.00000   0.00009   0.00009   2.09954
   A60        2.09820   0.00000   0.00001   0.00007   0.00007   2.09828
   A61        2.09015   0.00000  -0.00003  -0.00006  -0.00009   2.09006
   A62        2.09483   0.00000   0.00002   0.00000   0.00002   2.09485
   A63        2.08955   0.00000  -0.00001  -0.00007  -0.00008   2.08946
   A64        2.09666   0.00000   0.00002   0.00006   0.00007   2.09674
   A65        2.09696   0.00000   0.00000   0.00002   0.00001   2.09698
   A66        2.09453   0.00000   0.00001   0.00004   0.00005   2.09458
   A67        2.09772   0.00000   0.00000   0.00000   0.00000   2.09771
   A68        2.09090   0.00000  -0.00001  -0.00004  -0.00005   2.09085
   A69        2.10425   0.00000   0.00000   0.00000   0.00001   2.10425
   A70        2.08842   0.00000   0.00002   0.00005   0.00007   2.08849
   A71        2.09051   0.00000  -0.00002  -0.00006  -0.00007   2.09044
    D1        0.00008   0.00000   0.00006  -0.00001   0.00005   0.00013
    D2        3.14054   0.00000  -0.00002   0.00008   0.00006   3.14060
    D3        3.14136   0.00000  -0.00001  -0.00020  -0.00020   3.14116
    D4       -0.00136   0.00000  -0.00009  -0.00010  -0.00019  -0.00155
    D5       -0.00013   0.00000   0.00012   0.00018   0.00030   0.00017
    D6       -3.14095   0.00000   0.00017   0.00013   0.00029  -3.14066
    D7       -3.14141   0.00000   0.00019   0.00037   0.00056  -3.14086
    D8        0.00095   0.00000   0.00024   0.00031   0.00055   0.00150
    D9        0.00067   0.00000  -0.00017  -0.00012  -0.00029   0.00038
   D10        3.13762   0.00000  -0.00012   0.00019   0.00007   3.13769
   D11       -3.13982   0.00000  -0.00009  -0.00021  -0.00030  -3.14012
   D12       -0.00287   0.00000  -0.00004   0.00009   0.00006  -0.00282
   D13       -0.00136   0.00000   0.00010   0.00007   0.00016  -0.00119
   D14        3.13779   0.00000   0.00027   0.00026   0.00053   3.13832
   D15       -3.13784   0.00000   0.00004  -0.00027  -0.00023  -3.13806
   D16        0.00131   0.00000   0.00021  -0.00008   0.00014   0.00145
   D17        3.11578   0.00000   0.00117   0.00106   0.00223   3.11801
   D18       -0.03075   0.00001   0.00122   0.00139   0.00261  -0.02814
   D19        0.00134   0.00000   0.00009   0.00011   0.00020   0.00154
   D20       -3.14146   0.00000  -0.00004   0.00007   0.00003  -3.14143
   D21       -3.13786   0.00000  -0.00008  -0.00007  -0.00016  -3.13801
   D22        0.00253   0.00000  -0.00021  -0.00012  -0.00032   0.00220
   D23       -0.00058   0.00000  -0.00019  -0.00024  -0.00043  -0.00101
   D24        3.14027   0.00000  -0.00024  -0.00018  -0.00042   3.13985
   D25       -3.14097   0.00000  -0.00007  -0.00019  -0.00026  -3.14123
   D26       -0.00011   0.00000  -0.00012  -0.00014  -0.00025  -0.00037
   D27        0.00650   0.00000   0.00219   0.00184   0.00402   0.01052
   D28       -3.13546   0.00000   0.00203   0.00173   0.00376  -3.13170
   D29       -3.13431   0.00000   0.00224   0.00178   0.00402  -3.13029
   D30        0.00692   0.00000   0.00209   0.00167   0.00375   0.01067
   D31       -3.09918   0.00000  -0.00153  -0.00072  -0.00225  -3.10143
   D32        1.06788   0.00000  -0.00151  -0.00082  -0.00233   1.06555
   D33       -0.99118   0.00000  -0.00146  -0.00061  -0.00208  -0.99326
   D34       -3.13596   0.00000  -0.00009   0.00022   0.00012  -3.13584
   D35       -0.00727   0.00000   0.00010   0.00016   0.00026  -0.00702
   D36        0.00600   0.00000   0.00006   0.00033   0.00038   0.00639
   D37        3.13469   0.00000   0.00025   0.00027   0.00052   3.13520
   D38       -3.09831   0.00000  -0.00059   0.00082   0.00023  -3.09808
   D39        0.05002   0.00000  -0.00001  -0.00110  -0.00111   0.04891
   D40        0.05596   0.00000  -0.00078   0.00087   0.00010   0.05606
   D41       -3.07889   0.00000  -0.00020  -0.00104  -0.00124  -3.08013
   D42       -3.03870   0.00000   0.00255   0.00021   0.00275  -3.03595
   D43        0.11425   0.00000   0.00253   0.00032   0.00285   0.11709
   D44        0.09623   0.00000   0.00197   0.00210   0.00407   0.10031
   D45       -3.03400   0.00000   0.00195   0.00221   0.00417  -3.02983
   D46       -3.13798   0.00000  -0.00001  -0.00001  -0.00003  -3.13801
   D47        0.00346   0.00000  -0.00003  -0.00004  -0.00006   0.00340
   D48       -0.00700   0.00000   0.00001  -0.00012  -0.00011  -0.00711
   D49        3.13445   0.00000  -0.00001  -0.00014  -0.00015   3.13430
   D50        3.13326   0.00000  -0.00006  -0.00008  -0.00014   3.13312
   D51        0.00594   0.00000   0.00011   0.00004   0.00015   0.00608
   D52        0.00309   0.00000  -0.00008   0.00003  -0.00004   0.00304
   D53       -3.12423   0.00000   0.00009   0.00015   0.00024  -3.12399
   D54        0.00506   0.00000   0.00004   0.00011   0.00014   0.00520
   D55       -3.13719   0.00000   0.00003   0.00010   0.00012  -3.13707
   D56       -3.13639   0.00000   0.00005   0.00013   0.00018  -3.13620
   D57        0.00455   0.00000   0.00004   0.00012   0.00016   0.00471
   D58        0.00092   0.00000  -0.00001  -0.00001  -0.00002   0.00090
   D59        3.14104   0.00000  -0.00004  -0.00003  -0.00007   3.14097
   D60       -3.14002   0.00000   0.00000   0.00000   0.00000  -3.14002
   D61        0.00010   0.00000  -0.00003  -0.00002  -0.00005   0.00005
   D62       -0.00474   0.00000  -0.00006  -0.00007  -0.00013  -0.00487
   D63        3.13451   0.00000  -0.00007  -0.00008  -0.00015   3.13436
   D64        3.13825   0.00000  -0.00003  -0.00005  -0.00008   3.13817
   D65       -0.00569   0.00000  -0.00004  -0.00006  -0.00010  -0.00579
   D66       -0.00083   0.00000   0.00015   0.00007   0.00022  -0.00061
   D67        3.13933   0.00000   0.00012   0.00005   0.00017   3.13950
   D68        0.00270   0.00000   0.00010   0.00006   0.00016   0.00286
   D69        3.13038   0.00000  -0.00006  -0.00005  -0.00011   3.13027
   D70       -3.13649   0.00000   0.00012   0.00007   0.00018  -3.13631
   D71       -0.00881   0.00000  -0.00005  -0.00004  -0.00009  -0.00890
   D72        0.80553  -0.00001  -0.00994  -0.00950  -0.01944   0.78609
   D73       -2.37089  -0.00001  -0.01004  -0.01030  -0.02034  -2.39123
   D74        2.91874  -0.00001  -0.00998  -0.00940  -0.01938   2.89936
   D75       -0.25768  -0.00001  -0.01008  -0.01020  -0.02028  -0.27796
   D76       -1.28573  -0.00001  -0.01004  -0.00970  -0.01974  -1.30547
   D77        1.82103  -0.00002  -0.01014  -0.01050  -0.02064   1.80040
   D78        3.10754   0.00000  -0.00006  -0.00074  -0.00080   3.10675
   D79       -0.04948   0.00000  -0.00004  -0.00080  -0.00084  -0.05032
   D80        0.00040   0.00000   0.00005   0.00005   0.00010   0.00050
   D81        3.12656   0.00000   0.00006   0.00000   0.00006   3.12661
   D82       -3.09899   0.00000   0.00004   0.00077   0.00081  -3.09818
   D83        0.04547   0.00000   0.00009   0.00079   0.00088   0.04635
   D84        0.00828   0.00000  -0.00006   0.00000  -0.00007   0.00821
   D85       -3.13045   0.00000  -0.00001   0.00001   0.00001  -3.13044
   D86       -0.00776   0.00000  -0.00001  -0.00003  -0.00004  -0.00781
   D87        3.13539   0.00000  -0.00006  -0.00011  -0.00017   3.13522
   D88       -3.13378   0.00000  -0.00002   0.00002   0.00000  -3.13378
   D89        0.00938   0.00000  -0.00007  -0.00006  -0.00013   0.00925
   D90        0.00646   0.00000  -0.00002  -0.00003  -0.00005   0.00641
   D91       -3.13942   0.00000  -0.00004  -0.00012  -0.00016  -3.13959
   D92       -3.13670   0.00000   0.00003   0.00005   0.00008  -3.13662
   D93        0.00060   0.00000   0.00000  -0.00004  -0.00004   0.00056
   D94        0.00218   0.00000   0.00000   0.00008   0.00008   0.00226
   D95        3.13370   0.00000   0.00001  -0.00007  -0.00005   3.13364
   D96       -3.13512   0.00000   0.00003   0.00017   0.00020  -3.13492
   D97       -0.00361   0.00000   0.00004   0.00002   0.00006  -0.00354
   D98       -0.00961   0.00000   0.00004  -0.00006  -0.00002  -0.00963
   D99        3.12911   0.00000  -0.00002  -0.00008  -0.00009   3.12902
   D100      -3.14117   0.00000   0.00003   0.00008   0.00011  -3.14106
   D101      -0.00244   0.00000  -0.00003   0.00007   0.00004  -0.00240
         Item               Value     Threshold  Converged?
 Maximum Force            0.000018     0.000450     YES
 RMS     Force            0.000004     0.000300     YES
 Maximum Displacement     0.039856     0.001800     NO 
 RMS     Displacement     0.009228     0.001200     NO 
 Predicted change in Energy=-8.205861D-07
 GradGradGradGradGradGradGradGradGradGradGradGradGradGradGradGradGradGrad

                          Input orientation:                          
 ---------------------------------------------------------------------
 Center     Atomic      Atomic             Coordinates (Angstroms)
 Number     Number       Type             X           Y           Z
 ---------------------------------------------------------------------
      1          6           0       -0.000038   -0.011008   -0.000594
      2          6           0       -0.000432   -0.012627    1.381867
      3          6           0        1.213614   -0.004099    2.092845
      4          6           0        2.424684    0.006524    1.390523
      5          6           0        2.406161    0.007018   -0.003318
      6          6           0        1.207304   -0.001004   -0.734505
      7          8           0        1.098447   -0.001772    3.448747
      8          6           0        1.268198    0.002291   -2.190367
      9          6           0        0.244236    0.007911   -3.069433
     10          6           0        0.518453    0.003087   -4.525682
     11          6           0       -0.627109    0.066202   -5.487737
     12          6           0       -0.333123   -0.071775   -6.854397
     13          6           0       -1.332536   -0.021622   -7.815602
     14          6           0       -2.664326    0.176456   -7.425287
     15          6           0       -2.979045    0.323588   -6.069605
     16          6           0       -1.968381    0.266459   -5.117427
     17          8           0       -3.690721    0.236053   -8.318643
     18          6           0        2.290970   -0.022796    4.238566
     19          6           0        1.909107   -0.073040    5.697250
     20          6           0        0.908389   -0.945613    6.143091
     21          6           0        0.588866   -1.017331    7.497681
     22          6           0        1.271509   -0.225162    8.424136
     23          6           0        2.270108    0.644603    7.987109
     24          6           0        2.582253    0.723198    6.628587
     25          8           0        1.672975   -0.057721   -4.952964
     26          1           0       -0.950991   -0.018138   -0.523784
     27          1           0       -0.927077   -0.019390    1.946083
     28          1           0        3.374757    0.016285    1.910513
     29          1           0        3.349964    0.015140   -0.541850
     30          1           0        2.265394    0.000548   -2.628405
     31          1           0       -0.783900    0.004077   -2.726099
     32          1           0        0.703663   -0.219178   -7.136234
     33          1           0       -1.086874   -0.134643   -8.869717
     34          1           0       -4.013770    0.482877   -5.785841
     35          1           0       -2.241456    0.394526   -4.075983
     36          1           0       -3.340894    0.122904   -9.212654
     37          1           0        2.897959    0.868341    4.031501
     38          1           0        2.888654   -0.904800    3.963939
     39          1           0        0.373854   -1.555182    5.421429
     40          1           0       -0.192980   -1.693113    7.831998
     41          1           0        1.022614   -0.283565    9.479655
     42          1           0        2.800556    1.269305    8.699754
     43          1           0        3.353380    1.411174    6.290729
 ---------------------------------------------------------------------
                    Distance matrix (angstroms):
                    1          2          3          4          5
     1  C    0.000000
     2  C    1.382461   0.000000
     3  C    2.419811   1.406937   0.000000
     4  C    2.795495   2.425207   1.400022   0.000000
     5  C    2.406269   2.776835   2.411678   1.393964   0.000000
     6  C    1.412941   2.436758   2.827359   2.449043   1.404264
     7  O    3.620042   2.340865   1.360786   2.448522   3.691469
     8  C    2.530554   3.790844   4.283565   3.763011   2.465394
     9  C    3.078603   4.458066   5.252518   4.964429   3.751664
    10  C    4.554718   5.930313   6.654938   6.215723   4.900534
    11  C    5.523397   6.898579   7.801181   7.525122   6.267621
    12  C    6.862161   8.243192   9.080204   8.694270   7.378832
    13  C    7.927801   9.293440  10.230373   9.943352   8.660858
    14  C    7.890478   9.203154  10.279390  10.180639   8.990226
    15  C    6.768998   8.031787   9.182122   9.217067   8.117912
    16  C    5.489385   6.796435   7.885830   7.856208   6.734838
    17  O    9.103413  10.381713  11.511267  11.476880  10.313538
    18  C    4.818644   3.662152   2.401075   2.851331   4.243552
    19  C    6.009502   4.719378   3.671539   4.338208   5.722757
    20  C    6.280413   4.936160   4.169425   5.078644   6.397591
    21  C    7.588387   6.225744   5.534365   6.458784   7.785682
    22  C    8.522838   7.159369   6.335413   7.131284   8.506664
    23  C    8.329873   7.015449   6.023233   6.629177   8.016979
    24  C    7.152156   5.894046   4.793234   5.289213   6.672788
    25  O    5.227535   6.552282   7.060971   6.388194   5.004073
    26  H    1.085399   2.129577   3.395948   3.880768   3.397351
    27  H    2.156159   1.084923   2.145771   3.397591   3.861521
    28  H    3.878443   3.416461   2.168917   1.083108   2.144997
    29  H    3.393546   3.863497   3.392046   2.142494   1.086667
    30  H    3.469540   4.606128   4.836989   4.022087   2.628866
    31  H    2.836026   4.182042   5.216546   5.219348   4.194048
    32  H    7.173276   8.549646   9.245659   8.701634   7.336767
    33  H    8.936322  10.309715  11.202101  10.845437   9.530708
    34  H    7.058545   8.229729   9.467650   9.653021   8.653296
    35  H    4.668748   5.914059   7.081727   7.197646   6.191697
    36  H    9.800066  11.109496  12.189093  12.069912  10.856055
    37  H    5.042760   4.024591   2.712297   2.818063   4.154937
    38  H    4.986073   3.976165   2.667960   2.769161   4.099188
    39  H    5.650008   4.340234   3.767031   4.784666   5.999885
    40  H    8.013501   6.668231   6.145661   7.157761   8.428414
    41  H    9.539141   8.166652   7.394561   8.214865   9.587774
    42  H    9.229225   7.939796   6.913117   7.427029   8.802976
    43  H    7.269715   6.113280   4.919738   5.181461   6.517968
                    6          7          8          9         10
     6  C    0.000000
     7  O    4.184668   0.000000
     8  C    1.457139   5.641669   0.000000
     9  C    2.525761   6.573921   1.349550   0.000000
    10  C    3.853253   7.995494   2.452716   1.481850   0.000000
    11  C    5.095371   9.101808   3.803803   2.571154   1.497279
    12  C    6.311180  10.402358   4.931824   3.829575   2.480665
    13  C    7.522842  11.523699   6.197392   5.001321   3.774963
    14  C    7.732243  11.508034   6.549768   5.240382   4.309042
    15  C    6.789269  10.360059   5.761145   4.414774   3.836523
    16  C    5.419088   9.102567   4.371831   3.026021   2.569799
    17  O    9.031390  12.706855   7.886780   6.564309   5.670800
    18  C    5.089817   1.430513   6.509828   7.589262   8.941729
    19  C    6.470332   2.391237   7.913971   8.923737  10.317367
    20  C    6.948594   2.861197   8.394909   9.285521  10.717966
    21  C    8.317708   4.205342   9.765213  10.622325  12.066792
    22  C    9.161609   4.983408  10.616940  11.541739  12.973703
    23  C    8.809819   4.731524  10.246824  11.258625  12.651078
    24  C    7.525296   3.583106   8.945413  10.001478  11.366422
    25  O    4.244463   8.421518   2.792739   2.365014   1.232554
    26  H    2.168626   4.470063   2.775377   2.812397   4.263204
    27  H    3.426583   2.522114   4.682939   5.150545   6.631275
    28  H    3.419689   2.747377   4.610315   5.882184   7.041538
    29  H    2.151364   4.581973   2.655470   4.004281   4.887588
    30  H    2.169427   6.188177   1.089165   2.068728   2.579044
    31  H    2.816268   6.455384   2.120877   1.083954   2.221401
    32  H    6.425215  10.594571   4.982905   4.098965   2.626535
    33  H    8.453567  12.511508   7.083702   5.952771   4.633216
    34  H    7.280780  10.566327   6.407619   5.072976   4.728556
    35  H    4.818285   8.242182   4.003382   2.709480   2.823570
    36  H    9.621874  13.417688   8.400642   7.113757   6.072612
    37  H    5.131168   2.082052   6.489823   7.629275   8.923905
    38  H    5.071406   2.070199   6.428388   7.569300   8.860913
    39  H    6.403564   2.613348   7.820806   8.634511  10.069465
    40  H    8.843585   4.872506  10.269237  11.042003  12.493818
    41  H   10.219736   6.037964  11.676105  12.576582  14.017339
    42  H    9.651807   5.664441  11.070148  12.109486  13.480485
    43  H    7.480227   3.893328   8.846577   9.962357  11.270061
                   11         12         13         14         15
    11  C    0.000000
    12  C    1.404715   0.000000
    13  C    2.433988   1.387537   0.000000
    14  C    2.813629   2.412891   1.401872   0.000000
    15  C    2.436477   2.788031   2.424597   1.399489   0.000000
    16  C    1.405789   2.409468   2.787012   2.412189   1.389730
    17  O    4.174757   3.675900   2.424970   1.362030   2.360576
    18  C   10.155002  11.399214  12.587008  12.674388  11.582375
    19  C   11.469774  12.750350  13.896333  13.898904  12.747950
    20  C   11.775299  13.085856  14.167591  14.075660  12.879167
    21  C   13.087158  14.412712  15.465441  15.320031  14.092526
    22  C   14.043854  15.363331  16.448452  16.335737  15.114128
    23  C   13.794922  15.085101  16.221855  16.189803  15.008259
    24  C   12.551373  13.817462  14.983823  15.011226  13.868375
    25  O    2.364683   2.764068   4.150795   4.997939   4.799331
    26  H    4.975223   6.360920   7.301795   7.113658   5.914889
    27  H    7.440362   8.820656   9.770103   9.533046   8.281272
    28  H    8.411392   9.517340  10.805432  11.119952  10.205269
    29  H    6.346771   7.308962   8.650701   9.142177   8.408779
    30  H    4.067759   4.961504   6.312892   6.880636   6.280951
    31  H    2.766783   4.153528   5.119054   5.064394   4.012453
    32  H    2.137741   1.084474   2.155615   3.403443   3.872290
    33  H    3.418993   2.152582   1.088247   2.161369   3.410414
    34  H    3.425195   3.872547   3.400510   2.145385   1.084689
    35  H    2.169553   3.402756   3.870925   3.382929   2.126875
    36  H    4.608997   3.827005   2.450743   1.911882   3.170168
    37  H   10.182603  11.394142  12.611224  12.754438  11.699071
    38  H   10.131022  11.318576  12.544164  12.716885  11.688064
    39  H   11.074326  12.385322  13.434380  13.314173  12.116747
    40  H   13.442433  14.776284  15.777828  15.568802  14.320747
    41  H   15.062096  16.391586  17.456840  17.308443  16.067401
    42  H   14.645178  15.923255  17.073545  17.060956  15.888113
    43  H   12.505419  13.732581  14.933161  15.028852  13.930553
                   16         17         18         19         20
    16  C    0.000000
    17  O    3.635267   0.000000
    18  C   10.283985  13.911547   0.000000
    19  C   11.493799  15.096320   1.508676   0.000000
    20  C   11.685213  15.221364   2.527912   1.400569   0.000000
    21  C   12.935555  16.432953   3.808949   2.424103   1.393612
    22  C   13.932427  17.468747   4.312685   2.804564   2.419519
    23  C   13.778122  17.365942   3.807549   2.426682   2.789887
    24  C   12.604989  16.217498   2.520626   1.398038   2.412977
    25  O    3.659455   6.339032   9.212348  10.652843  11.157750
    26  H    4.713559   8.266231   5.761103   6.847221   6.983174
    27  H    7.145572  10.633325   3.951116   4.702986   4.673510
    28  H    8.831968  12.434023   2.568259   4.061464   4.992288
    29  H    7.020246  10.492786   4.896456   6.403922   7.181418
    30  H    4.918413   8.240727   6.867058   8.333600   8.926131
    31  H    2.681472   6.307137   7.613284   8.843701   9.079002
    32  H    3.383968   4.573394  11.486695  12.890801  13.300755
    33  H    3.875257   2.687214  13.536965  14.871995  15.166514
    34  H    2.162691   2.565223  11.853024  12.932552  12.983361
    35  H    1.084240   4.486162   9.478859  10.628353  10.777151
    36  H    4.321490   0.966662  14.583361  15.808420  15.968626
    37  H   10.380097  14.012014   1.097924   2.153775   3.421642
    38  H   10.365030  13.980399   1.100262   2.157708   2.944795
    39  H   10.948604  14.440183   2.724464   2.151702   1.085402
    40  H   13.216640  16.637280   4.676829   3.405959   2.150390
    41  H   14.910512  18.419146   5.398680   3.890601   3.403529
    42  H   14.651381  18.243633   4.672409   3.407580   3.875911
    43  H   12.640314  16.261428   2.719625   2.154306   3.399150
                   21         22         23         24         25
    21  C    0.000000
    22  C    1.397087   0.000000
    23  C    2.414154   1.394519   0.000000
    24  C    2.785383   2.416905   1.396135   0.000000
    25  O   12.534541  13.384170  12.972868  11.643408   0.000000
    26  H    8.228818   9.222127   9.124144   8.011854   5.148243
    27  H    5.840737   6.844070   6.867086   5.898532   7.372828
    28  H    6.328191   6.849032   6.208063   4.836116   7.071694
    29  H    8.562927   9.206879   8.620061   7.246096   4.719696
    30  H   10.314283  11.099433  10.635034   9.290561   2.399569
    31  H   10.365975  11.340414  11.158407   9.967862   3.316472
    32  H   14.656114  15.570729  15.228767  13.924348   2.394222
    33  H   16.476619  17.454155  17.205497  15.949791   4.792039
    34  H   14.138134  15.177580  15.139598  14.059990   5.772781
    35  H   11.998074  12.999151  12.881574  11.745809   4.036879
    36  H   17.204024  18.233260  18.099374  16.923030   6.581524
    37  H    4.571879   4.810024   4.011370   2.620228   9.114756
    38  H    4.217703   4.792746   4.355358   3.137612   9.039169
    39  H    2.155536   3.404554   3.875248   3.394889  10.562108
    40  H    1.086155   2.156441   3.399380   3.871522  13.023500
    41  H    2.157491   1.086039   2.155327   3.402151  14.449030
    42  H    3.400773   2.155778   1.086044   2.153049  13.763327
    43  H    3.872584   3.400471   2.153790   1.087242  11.463073
                   26         27         28         29         30
    26  H    0.000000
    27  H    2.469983   0.000000
    28  H    4.963777   4.302129   0.000000
    29  H    4.301122   4.948139   2.452489   0.000000
    30  H    3.843815   5.578369   4.672548   2.351641   0.000000
    31  H    2.208756   4.674434   6.228382   4.675457   3.050860
    32  H    6.819296   9.229719   9.435773   7.109410   4.775752
    33  H    8.347853  10.817595  11.668003   9.437231   7.085898
    34  H    6.109082   8.340419  10.679041   9.052226   7.044852
    35  H    3.801804   6.177718   8.217241   6.625557   4.749989
    36  H    9.012657  11.417713  12.993697  10.952717   8.648570
    37  H    6.029169   4.446115   2.334936   4.674163   6.745928
    38  H    5.972328   4.406302   2.302445   4.621822   6.683346
    39  H    6.281980   4.016106   4.878674   6.847177   8.414157
    40  H    8.555654   6.163136   7.121431   9.251590  10.878057
    41  H   10.199723   7.786256   7.931860  10.292538  12.174988
    42  H   10.040183   7.821001   6.927739   9.342485  11.411544
    43  H    8.185849   6.264565   4.597006   6.973741   9.095303
                   31         32         33         34         35
    31  H    0.000000
    32  H    4.659611   0.000000
    33  H    6.152649   2.493618   0.000000
    34  H    4.474744   4.956876   4.296318   0.000000
    35  H    2.024625   4.291327   4.959129   2.464248   0.000000
    36  H    6.973359   4.559274   2.294459   3.510753   5.260031
    37  H    7.743913  11.433106  13.539804  12.012526   9.610899
    38  H    7.685722  11.333936  13.457366  12.026110   9.625312
    39  H    8.375791  12.632837  14.435668  12.206876  10.042014
    40  H   10.709951  15.067329  16.798070  14.310098  12.261913
    41  H   12.342068  16.619074  18.470830  16.093103  13.959559
    42  H   12.041563  16.043412  18.049086  16.027663  13.762507
    43  H   10.019990  13.782684  15.872761  14.176748  11.823895
                   36         37         38         39         40
    36  H    0.000000
    37  H   14.659010   0.000000
    38  H   14.611161   1.774452   0.000000
    39  H   15.191171   3.765165   2.978504   0.000000
    40  H   17.427777   5.527996   5.007972   2.480155   0.000000
    41  H   19.199162   5.875899   5.855865   4.301987   2.485813
    42  H   18.970662   4.686454   5.211760   4.961252   4.300021
    43  H   16.935992   2.367739   3.315669   4.293311   4.958707
                   41         42         43
    41  H    0.000000
    42  H    2.486107   0.000000
    43  H    4.298123   2.475711   0.000000
 Stoichiometry    C22H18O3
 Framework group  C1[X(C22H18O3)]
 Deg. of freedom   123
 Full point group                 C1      NOp   1
 Largest Abelian subgroup         C1      NOp   1
 Largest concise Abelian subgroup C1      NOp   1
                         Standard orientation:                         
 ---------------------------------------------------------------------
 Center     Atomic      Atomic             Coordinates (Angstroms)
 Number     Number       Type             X           Y           Z
 ---------------------------------------------------------------------
      1          6           0        0.223430   -0.465934    0.016758
      2          6           0        1.564804   -0.798491    0.053103
      3          6           0        2.547527    0.207881    0.022416
      4          6           0        2.158131    1.550978   -0.044825
      5          6           0        0.801166    1.867874   -0.081690
      6          6           0       -0.197508    0.881105   -0.051787
      7          8           0        3.835375   -0.229328    0.067522
      8          6           0       -1.595532    1.290023   -0.091399
      9          6           0       -2.695698    0.509023   -0.060391
     10          6           0       -4.042497    1.124361   -0.118437
     11          6           0       -5.253395    0.248516   -0.026420
     12          6           0       -6.506498    0.854364   -0.215911
     13          6           0       -7.681110    0.119274   -0.143881
     14          6           0       -7.626722   -1.254704    0.129013
     15          6           0       -6.389411   -1.877520    0.328345
     16          6           0       -5.220740   -1.129730    0.248558
     17          8           0       -8.742150   -2.031738    0.213639
     18          6           0        4.889848    0.735662    0.010534
     19          6           0        6.213860    0.012455    0.018869
     20          6           0        6.418060   -1.111308   -0.791719
     21          6           0        7.656431   -1.750238   -0.810695
     22          6           0        8.708261   -1.268718   -0.027340
     23          6           0        8.512143   -0.149277    0.780789
     24          6           0        7.268075    0.483814    0.806881
     25          8           0       -4.177590    2.342755   -0.246715
     26          1           0       -0.513609   -1.262340    0.041271
     27          1           0        1.888770   -1.832529    0.106652
     28          1           0        2.891813    2.347441   -0.066757
     29          1           0        0.506242    2.912445   -0.134007
     30          1           0       -1.779911    2.361677   -0.153389
     31          1           0       -2.610596   -0.570168   -0.005072
     32          1           0       -6.527574    1.919068   -0.420964
     33          1           0       -8.642975    0.604543   -0.297540
     34          1           0       -6.366146   -2.940052    0.545219
     35          1           0       -4.278010   -1.637718    0.418217
     36          1           0       -9.523522   -1.483976    0.059210
     37          1           0        4.822049    1.421443    0.865252
     38          1           0        4.780815    1.333698   -0.906550
     39          1           0        5.597952   -1.488690   -1.394298
     40          1           0        7.802285   -2.624533   -1.438443
     41          1           0        9.673277   -1.766638   -0.044646
     42          1           0        9.322290    0.227120    1.398429
     43          1           0        7.116015    1.349223    1.447225
 ---------------------------------------------------------------------
 Rotational constants (GHZ):      0.9064253      0.0488015      0.0467051
 Standard basis: 6-31G(d,p) (6D, 7F)
 There are   465 symmetry adapted basis functions of A   symmetry.
 Integral buffers will be    262144 words long.
 Raffenetti 2 integral format.
 Two-electron integral symmetry is turned on.
   465 basis functions,   826 primitive gaussians,   465 cartesian basis functions
    87 alpha electrons       87 beta electrons
       nuclear repulsion energy      1771.9860813716 Hartrees.
 NAtoms=   43 NActive=   43 NUniq=   43 SFac= 7.50D-01 NAtFMM=   80 NAOKFM=F Big=F
 One-electron integrals computed using PRISM.
 NBasis=   465 RedAO= T  NBF=   465
 NBsUse=   465 1.00D-06 NBFU=   465
 Initial guess read from the read-write file.
 B after Tr=     0.000000    0.000000    0.000000
         Rot=    1.000000    0.000000    0.000000    0.000000 Ang=   0.00 deg.
 Initial guess orbital symmetries:
       Occupied  (A) (A) (A) (A) (A) (A) (A) (A) (A) (A) (A) (A)
                 (A) (A) (A) (A) (A) (A) (A) (A) (A) (A) (A) (A)
                 (A) (A) (A) (A) (A) (A) (A) (A) (A) (A) (A) (A)
                 (A) (A) (A) (A) (A) (A) (A) (A) (A) (A) (A) (A)
                 (A) (A) (A) (A) (A) (A) (A) (A) (A) (A) (A) (A)
                 (A) (A) (A) (A) (A) (A) (A) (A) (A) (A) (A) (A)
                 (A) (A) (A) (A) (A) (A) (A) (A) (A) (A) (A) (A)
                 (A) (A) (A)
       Virtual   (A) (A) (A) (A) (A) (A) (A) (A) (A) (A) (A) (A)
                 (A) (A) (A) (A) (A) (A) (A) (A) (A) (A) (A) (A)
                 (A) (A) (A) (A) (A) (A) (A) (A) (A) (A) (A) (A)
                 (A) (A) (A) (A) (A) (A) (A) (A) (A) (A) (A) (A)
                 (A) (A) (A) (A) (A) (A) (A) (A) (A) (A) (A) (A)
                 (A) (A) (A) (A) (A) (A) (A) (A) (A) (A) (A) (A)
                 (A) (A) (A) (A) (A) (A) (A) (A) (A) (A) (A) (A)
                 (A) (A) (A) (A) (A) (A) (A) (A) (A) (A) (A) (A)
                 (A) (A) (A) (A) (A) (A) (A) (A) (A) (A) (A) (A)
                 (A) (A) (A) (A) (A) (A) (A) (A) (A) (A) (A) (A)
                 (A) (A) (A) (A) (A) (A) (A) (A) (A) (A) (A) (A)
                 (A) (A) (A) (A) (A) (A) (A) (A) (A) (A) (A) (A)
                 (A) (A) (A) (A) (A) (A) (A) (A) (A) (A) (A) (A)
                 (A) (A) (A) (A) (A) (A) (A) (A) (A) (A) (A) (A)
                 (A) (A) (A) (A) (A) (A) (A) (A) (A) (A) (A) (A)
                 (A) (A) (A) (A) (A) (A) (A) (A) (A) (A) (A) (A)
                 (A) (A) (A) (A) (A) (A) (A) (A) (A) (A) (A) (A)
                 (A) (A) (A) (A) (A) (A) (A) (A) (A) (A) (A) (A)
                 (A) (A) (A) (A) (A) (A) (A) (A) (A) (A) (A) (A)
                 (A) (A) (A) (A) (A) (A) (A) (A) (A) (A) (A) (A)
                 (A) (A) (A) (A) (A) (A) (A) (A) (A) (A) (A) (A)
                 (A) (A) (A) (A) (A) (A) (A) (A) (A) (A) (A) (A)
                 (A) (A) (A) (A) (A) (A) (A) (A) (A) (A) (A) (A)
                 (A) (A) (A) (A) (A) (A) (A) (A) (A) (A) (A) (A)
                 (A) (A) (A) (A) (A) (A) (A) (A) (A) (A) (A) (A)
                 (A) (A) (A) (A) (A) (A) (A) (A) (A) (A) (A) (A)
                 (A) (A) (A) (A) (A) (A) (A) (A) (A) (A) (A) (A)
                 (A) (A) (A) (A) (A) (A) (A) (A) (A) (A) (A) (A)
                 (A) (A) (A) (A) (A) (A) (A) (A) (A) (A) (A) (A)
                 (A) (A) (A) (A) (A) (A) (A) (A) (A) (A) (A) (A)
                 (A) (A) (A) (A) (A) (A) (A) (A) (A) (A) (A) (A)
                 (A) (A) (A) (A) (A) (A)
 Harris functional with IExCor=  402 diagonalized for initial guess.
 ExpMin= 1.61D-01 ExpMax= 5.48D+03 ExpMxC= 8.25D+02 IAcc=1 IRadAn=         1 AccDes= 0.00D+00
 HarFok:  IExCor=  402 AccDes= 0.00D+00 IRadAn=         1 IDoV= 1
 ScaDFX=  1.000000  1.000000  1.000000  1.000000
 FoFCou: FMM=F IPFlag=           0 FMFlag=      100000 FMFlg1=           0
         NFxFlg=           0 DoJE=T BraDBF=F KetDBF=T FulRan=T
         Omega=  0.000000  0.000000  1.000000  0.000000  0.000000 ICntrl=     500 IOpCl=  0
         NMat0=    1 NMatS0=    1 NMatT0=    0 NMatD0=    1 NMtDS0=    0 NMtDT0=    0
         I1Cent=           4 NGrid=           0.
 Petite list used in FoFCou.
 Requested convergence on RMS density matrix=1.00D-08 within 128 cycles.
 Requested convergence on MAX density matrix=1.00D-06.
 Requested convergence on             energy=1.00D-06.
 No special actions if energy rises.
 Integral accuracy reduced to 1.0D-05 until final iterations.
 Initial convergence to 1.0D-05 achieved.  Increase integral accuracy.
 SCF Done:  E(RB3LYP) =  -1074.86483162     A.U. after   16 cycles
             Convg  =    0.6047D-08             -V/T =  2.0095
 Calling FoFJK, ICntrl=      2127 FMM=F ISym2X=0 I1Cent= 0 IOpClX= 0 NMat=1 NMatS=1 NMatT=0.
 ***** Axes restored to original set *****
 -------------------------------------------------------------------
 Center     Atomic                   Forces (Hartrees/Bohr)
 Number     Number              X              Y              Z
 -------------------------------------------------------------------
      1        6          -0.000008987    0.000004386   -0.000008057
      2        6          -0.000003689    0.000005306    0.000013481
      3        6          -0.000012658   -0.000016587   -0.000011182
      4        6           0.000011947   -0.000003194    0.000015956
      5        6           0.000007593    0.000002576    0.000001032
      6        6          -0.000000686    0.000005349    0.000000222
      7        8           0.000065562    0.000019469    0.000008016
      8        6          -0.000004349    0.000002667   -0.000003154
      9        6           0.000007128   -0.000039748    0.000033514
     10        6          -0.000009321    0.000211027    0.000016379
     11        6           0.000019154   -0.000066059   -0.000043102
     12        6           0.000020875    0.000007739    0.000027854
     13        6          -0.000009611    0.000002486   -0.000027193
     14        6           0.000017252    0.000000131    0.000034654
     15        6          -0.000022255    0.000000373   -0.000015370
     16        6          -0.000020842   -0.000007856    0.000025155
     17        8           0.000028125   -0.000017102   -0.000061010
     18        6          -0.000033369    0.000020158   -0.000033313
     19        6          -0.000075660   -0.000063536    0.000003583
     20        6          -0.000015289   -0.000030138   -0.000012612
     21        6           0.000025516    0.000016518    0.000021747
     22        6          -0.000027562   -0.000030301    0.000021850
     23        6           0.000018927    0.000003107   -0.000021801
     24        6           0.000028908    0.000011274   -0.000008740
     25        8           0.000000167   -0.000086295   -0.000020076
     26        1           0.000004814   -0.000006765    0.000005265
     27        1           0.000006440   -0.000006013   -0.000007294
     28        1          -0.000007747    0.000015469   -0.000004269
     29        1          -0.000006720    0.000006608    0.000002350
     30        1          -0.000003101    0.000015637    0.000001284
     31        1          -0.000007306   -0.000018132   -0.000022983
     32        1          -0.000005302    0.000008637   -0.000005942
     33        1          -0.000002347    0.000004650    0.000012628
     34        1           0.000006788   -0.000008957   -0.000005572
     35        1           0.000019961   -0.000007031   -0.000001416
     36        1          -0.000028813    0.000006530    0.000047839
     37        1          -0.000002544    0.000000406    0.000007339
     38        1           0.000011336    0.000015720    0.000014000
     39        1           0.000016889    0.000022738    0.000010390
     40        1           0.000007559   -0.000005898   -0.000005315
     41        1           0.000002667   -0.000004942   -0.000008659
     42        1          -0.000008394   -0.000001580   -0.000004761
     43        1          -0.000011057    0.000011175    0.000007283
 -------------------------------------------------------------------
 Cartesian Forces:  Max     0.000211027 RMS     0.000028636

 GradGradGradGradGradGradGradGradGradGradGradGradGradGradGradGradGradGrad
 Berny optimization.
 Using GEDIIS/GDIIS optimizer.
 Internal  Forces:  Max     0.000087871 RMS     0.000015360
 Search for a local minimum.
 Step number   3 out of a maximum of  227
 All quantities printed in internal units (Hartrees-Bohrs-Radians)
 Mixed Optimization -- En-DIIS/RFO-DIIS
 Swaping is turned off.
 Update second derivatives using D2CorX and points    1    2    3
 DE=  5.14D-07 DEPred=-8.21D-07 R=-6.27D-01
 Trust test=-6.27D-01 RLast= 5.04D-02 DXMaxT set to 1.50D-01
     Eigenvalues ---    0.00033   0.00819   0.01009   0.01280   0.01308
     Eigenvalues ---    0.01535   0.01633   0.01707   0.01778   0.01906
     Eigenvalues ---    0.01989   0.02038   0.02043   0.02061   0.02089
     Eigenvalues ---    0.02089   0.02096   0.02104   0.02120   0.02120
     Eigenvalues ---    0.02123   0.02127   0.02129   0.02139   0.02142
     Eigenvalues ---    0.02144   0.02146   0.02149   0.02151   0.02153
     Eigenvalues ---    0.02157   0.02172   0.02174   0.02185   0.02195
     Eigenvalues ---    0.02203   0.02238   0.02761   0.06396   0.07372
     Eigenvalues ---    0.11398   0.13898   0.15991   0.15999   0.15999
     Eigenvalues ---    0.15999   0.16000   0.16000   0.16000   0.16000
     Eigenvalues ---    0.16000   0.16000   0.16000   0.16000   0.16000
     Eigenvalues ---    0.16000   0.16009   0.16448   0.21979   0.22000
     Eigenvalues ---    0.22000   0.22000   0.22004   0.22032   0.22228
     Eigenvalues ---    0.22958   0.22983   0.23478   0.24000   0.24046
     Eigenvalues ---    0.24935   0.24999   0.25000   0.25000   0.25000
     Eigenvalues ---    0.25000   0.25426   0.31297   0.31813   0.33638
     Eigenvalues ---    0.33898   0.34324   0.34511   0.34925   0.35053
     Eigenvalues ---    0.35135   0.35206   0.35264   0.35276   0.35282
     Eigenvalues ---    0.35350   0.35398   0.35428   0.35456   0.35498
     Eigenvalues ---    0.35504   0.35628   0.37275   0.38716   0.40921
     Eigenvalues ---    0.41199   0.41621   0.41898   0.41971   0.42009
     Eigenvalues ---    0.43137   0.44627   0.44761   0.45199   0.45324
     Eigenvalues ---    0.45806   0.45937   0.46045   0.46281   0.46468
     Eigenvalues ---    0.46751   0.47651   0.48026   0.52562   0.52817
     Eigenvalues ---    0.55030   0.55519   0.902291000.000001000.00000
     Eigenvalues --- 1000.000001000.000001000.000001000.000001000.00000
     Eigenvalues --- 1000.000001000.000001000.000001000.000001000.00000
     Eigenvalues --- 1000.000001000.000001000.000001000.000001000.00000
     Eigenvalues --- 1000.000001000.000001000.000001000.000001000.00000
     Eigenvalues --- 1000.000001000.000001000.000001000.000001000.00000
     Eigenvalues --- 1000.000001000.000001000.000001000.000001000.00000
     Eigenvalues --- 1000.000001000.000001000.000001000.000001000.00000
     Eigenvalues --- 1000.000001000.000001000.000001000.000001000.00000
     Eigenvalues --- 1000.000001000.000001000.000001000.000001000.00000
     Eigenvalues --- 1000.000001000.000001000.000001000.000001000.00000
     Eigenvalues --- 1000.000001000.000001000.000001000.000001000.00000
     Eigenvalues --- 1000.000001000.000001000.000001000.000001000.00000
     Eigenvalues --- 1000.000001000.000001000.000001000.000001000.00000
     Eigenvalues --- 1000.000001000.000001000.000001000.000001000.00000
     Eigenvalues --- 1000.000001000.000001000.000001000.000001000.00000
     Eigenvalues --- 1000.000001000.000001000.000001000.000001000.00000
     Eigenvalues --- 1000.000001000.000001000.000001000.000001000.00000
     Eigenvalues --- 1000.000001000.000001000.000001000.000001000.00000
     Eigenvalues --- 1000.000001000.00000
 En-DIIS/RFO-DIIS IScMMF=        0 using points:     3    2    1
 RFO step:  Lambda=-1.69603640D-07.
 DIIS coeffs:      0.52083      5.25139     -4.77222
 Iteration  1 RMS(Cart)=  0.00466102 RMS(Int)=  0.00000773
 Iteration  2 RMS(Cart)=  0.00001304 RMS(Int)=  0.00000018
 Iteration  3 RMS(Cart)=  0.00000000 RMS(Int)=  0.00000018
 Variable       Old X    -DE/DX   Delta X   Delta X   Delta X     New X
                                  (DIIS)     (GDIIS)  (Total)
    R1        2.61247   0.00000  -0.00001   0.00000   0.00000   2.61247
    R2        2.67007   0.00000  -0.00001   0.00001   0.00000   2.67007
    R3        2.05111  -0.00001   0.00001  -0.00002   0.00000   2.05110
    R4        2.65873   0.00000   0.00000  -0.00001  -0.00001   2.65871
    R5        2.05021  -0.00001   0.00002  -0.00002   0.00000   2.05021
    R6        2.64566   0.00000   0.00002  -0.00003  -0.00001   2.64564
    R7        2.57151   0.00000   0.00001  -0.00001   0.00000   2.57152
    R8        2.63421   0.00000   0.00000   0.00001   0.00001   2.63422
    R9        2.04678  -0.00001   0.00001  -0.00001   0.00000   2.04678
   R10        2.65367   0.00001  -0.00001   0.00001   0.00000   2.65367
   R11        2.05350  -0.00001   0.00001  -0.00001   0.00000   2.05350
   R12        2.75359   0.00000  -0.00002   0.00003   0.00001   2.75361
   R13        2.70328  -0.00005   0.00005  -0.00025  -0.00020   2.70307
   R14        2.55028   0.00000  -0.00001   0.00002   0.00000   2.55028
   R15        2.05822   0.00000   0.00002  -0.00002   0.00000   2.05822
   R16        2.80029   0.00001  -0.00001   0.00001   0.00000   2.80029
   R17        2.04838   0.00000  -0.00006   0.00006   0.00001   2.04838
   R18        2.82945  -0.00001   0.00012  -0.00015  -0.00003   2.82942
   R19        2.32919   0.00001  -0.00002   0.00001  -0.00001   2.32918
   R20        2.65453  -0.00002   0.00001  -0.00001   0.00001   2.65453
   R21        2.65656   0.00001   0.00005  -0.00007  -0.00002   2.65654
   R22        2.62207   0.00001  -0.00001   0.00001   0.00000   2.62206
   R23        2.04936  -0.00001   0.00001  -0.00001   0.00000   2.04936
   R24        2.64915   0.00000  -0.00001   0.00002   0.00001   2.64916
   R25        2.05649  -0.00001   0.00002  -0.00002   0.00000   2.05649
   R26        2.64465  -0.00001  -0.00001   0.00001   0.00000   2.64465
   R27        2.57386   0.00001  -0.00001   0.00001  -0.00001   2.57386
   R28        2.62621   0.00001   0.00000   0.00001   0.00000   2.62621
   R29        2.04977  -0.00001   0.00001  -0.00001   0.00000   2.04977
   R30        2.04892  -0.00001  -0.00005   0.00006   0.00001   2.04893
   R31        1.82673  -0.00006   0.00006  -0.00005   0.00000   1.82673
   R32        2.85099   0.00001  -0.00003   0.00015   0.00011   2.85110
   R33        2.07477   0.00000   0.00001   0.00002   0.00003   2.07481
   R34        2.07919  -0.00001   0.00001   0.00003   0.00005   2.07924
   R35        2.64669  -0.00001  -0.00001  -0.00005  -0.00006   2.64664
   R36        2.64191   0.00001   0.00000   0.00004   0.00004   2.64195
   R37        2.63354   0.00002  -0.00002   0.00008   0.00006   2.63361
   R38        2.05111  -0.00003   0.00005  -0.00012  -0.00007   2.05104
   R39        2.64011  -0.00001   0.00001  -0.00007  -0.00006   2.64005
   R40        2.05254  -0.00001   0.00001  -0.00001   0.00000   2.05254
   R41        2.63526   0.00002  -0.00001   0.00005   0.00004   2.63530
   R42        2.05232  -0.00001   0.00001  -0.00001   0.00000   2.05231
   R43        2.63831  -0.00002   0.00002  -0.00007  -0.00005   2.63826
   R44        2.05232  -0.00001   0.00001  -0.00001   0.00000   2.05233
   R45        2.05459   0.00000   0.00000   0.00002   0.00002   2.05461
    A1        2.11726   0.00000   0.00001  -0.00001   0.00000   2.11726
    A2        2.07347   0.00000   0.00001  -0.00001  -0.00001   2.07346
    A3        2.09245   0.00000  -0.00002   0.00003   0.00001   2.09246
    A4        2.10028   0.00000   0.00000  -0.00001   0.00000   2.10027
    A5        2.11800   0.00000   0.00001  -0.00002  -0.00001   2.11799
    A6        2.06491   0.00000  -0.00001   0.00002   0.00002   2.06492
    A7        2.08631   0.00001  -0.00002   0.00004   0.00002   2.08633
    A8        2.01585   0.00001  -0.00003   0.00003   0.00000   2.01584
    A9        2.18102  -0.00001   0.00005  -0.00006  -0.00001   2.18100
   A10        2.08302  -0.00001   0.00001  -0.00003  -0.00002   2.08300
   A11        2.11533   0.00000   0.00000   0.00000   0.00000   2.11533
   A12        2.08484   0.00000  -0.00002   0.00003   0.00002   2.08485
   A13        2.13174   0.00000  -0.00001   0.00001   0.00000   2.13175
   A14        2.07602   0.00000   0.00000  -0.00001  -0.00001   2.07601
   A15        2.07543   0.00000   0.00001  -0.00001   0.00000   2.07543
   A16        2.04776   0.00000   0.00001   0.00000   0.00000   2.04776
   A17        2.15879   0.00001  -0.00003   0.00001  -0.00002   2.15877
   A18        2.07664  -0.00001   0.00002  -0.00001   0.00002   2.07665
   A19        2.07095   0.00001   0.00003   0.00002   0.00005   2.07100
   A20        2.23840   0.00001  -0.00003   0.00000  -0.00003   2.23837
   A21        2.02649  -0.00001   0.00001   0.00000   0.00001   2.02650
   A22        2.01830  -0.00001   0.00001   0.00001   0.00002   2.01832
   A23        2.09405   0.00001  -0.00011   0.00014   0.00004   2.09409
   A24        2.10987   0.00002  -0.00009   0.00009  -0.00001   2.10986
   A25        2.07920  -0.00003   0.00020  -0.00023  -0.00003   2.07916
   A26        2.08256  -0.00002   0.00037  -0.00045  -0.00008   2.08248
   A27        2.11084   0.00003  -0.00027   0.00031   0.00004   2.11087
   A28        2.08978  -0.00001  -0.00011   0.00013   0.00002   2.08979
   A29        2.04977   0.00003  -0.00022   0.00024   0.00003   2.04979
   A30        2.17333  -0.00004   0.00032  -0.00036  -0.00004   2.17329
   A31        2.06004   0.00001  -0.00010   0.00012   0.00001   2.06005
   A32        2.11727  -0.00001   0.00008  -0.00008  -0.00001   2.11727
   A33        2.05587   0.00001  -0.00006   0.00007   0.00001   2.05588
   A34        2.11004   0.00000  -0.00001   0.00002   0.00000   2.11004
   A35        2.09036   0.00000   0.00000   0.00000   0.00000   2.09036
   A36        2.09979   0.00000   0.00000   0.00000   0.00000   2.09979
   A37        2.09304   0.00000   0.00000   0.00000   0.00000   2.09304
   A38        2.09232   0.00001  -0.00004   0.00003  -0.00001   2.09232
   A39        2.14060  -0.00001   0.00002  -0.00002   0.00000   2.14060
   A40        2.05026  -0.00001   0.00002  -0.00001   0.00000   2.05026
   A41        2.08960  -0.00001   0.00003  -0.00003   0.00001   2.08961
   A42        2.07531   0.00000  -0.00002   0.00002   0.00000   2.07531
   A43        2.11827   0.00001  -0.00001   0.00000  -0.00001   2.11826
   A44        2.11675   0.00000   0.00003  -0.00004  -0.00001   2.11675
   A45        2.10615  -0.00002   0.00012  -0.00013   0.00000   2.10615
   A46        2.06019   0.00002  -0.00016   0.00017   0.00001   2.06020
   A47        1.90580   0.00002  -0.00008   0.00008   0.00001   1.90580
   A48        1.90003   0.00005  -0.00012   0.00036   0.00024   1.90027
   A49        1.92284  -0.00001   0.00001  -0.00003  -0.00002   1.92282
   A50        1.90373   0.00000   0.00000   0.00008   0.00008   1.90381
   A51        1.92763  -0.00001   0.00001  -0.00005  -0.00004   1.92759
   A52        1.93064  -0.00003   0.00005  -0.00017  -0.00012   1.93052
   A53        1.87890   0.00000   0.00006  -0.00020  -0.00014   1.87876
   A54        2.10526   0.00008  -0.00014   0.00047   0.00034   2.10559
   A55        2.09816  -0.00009   0.00015  -0.00051  -0.00036   2.09781
   A56        2.07922   0.00001   0.00000   0.00001   0.00000   2.07922
   A57        2.10052  -0.00001   0.00002  -0.00006  -0.00004   2.10048
   A58        2.08302   0.00000   0.00002  -0.00006  -0.00004   2.08298
   A59        2.09954   0.00002  -0.00004   0.00012   0.00008   2.09962
   A60        2.09828   0.00001  -0.00003   0.00009   0.00006   2.09834
   A61        2.09006  -0.00001   0.00002  -0.00008  -0.00006   2.08999
   A62        2.09485   0.00000   0.00001  -0.00001   0.00000   2.09485
   A63        2.08946  -0.00001   0.00003  -0.00009  -0.00006   2.08941
   A64        2.09674   0.00001  -0.00002   0.00007   0.00005   2.09678
   A65        2.09698   0.00000  -0.00001   0.00002   0.00001   2.09699
   A66        2.09458   0.00000  -0.00002   0.00005   0.00003   2.09461
   A67        2.09771   0.00000   0.00000   0.00000   0.00000   2.09771
   A68        2.09085   0.00000   0.00002  -0.00005  -0.00003   2.09082
   A69        2.10425   0.00000   0.00000   0.00000   0.00000   2.10425
   A70        2.08849   0.00001  -0.00002   0.00007   0.00005   2.08854
   A71        2.09044  -0.00001   0.00002  -0.00007  -0.00005   2.09039
    D1        0.00013   0.00000   0.00004  -0.00006  -0.00002   0.00011
    D2        3.14060   0.00000  -0.00005   0.00011   0.00006   3.14066
    D3        3.14116   0.00000   0.00009  -0.00026  -0.00017   3.14099
    D4       -0.00155   0.00000   0.00000  -0.00009  -0.00009  -0.00164
    D5        0.00017   0.00000  -0.00003   0.00015   0.00012   0.00028
    D6       -3.14066   0.00000   0.00002   0.00007   0.00009  -3.14057
    D7       -3.14086   0.00000  -0.00009   0.00036   0.00027  -3.14059
    D8        0.00150   0.00000  -0.00003   0.00028   0.00024   0.00175
    D9        0.00038   0.00000  -0.00003  -0.00003  -0.00005   0.00033
   D10        3.13769   0.00000  -0.00015   0.00026   0.00012   3.13780
   D11       -3.14012   0.00000   0.00006  -0.00019  -0.00013  -3.14025
   D12       -0.00282   0.00000  -0.00006   0.00010   0.00004  -0.00278
   D13       -0.00119   0.00000   0.00002   0.00001   0.00002  -0.00117
   D14        3.13832   0.00000   0.00001   0.00012   0.00013   3.13845
   D15       -3.13806   0.00000   0.00015  -0.00031  -0.00016  -3.13822
   D16        0.00145  -0.00001   0.00014  -0.00020  -0.00005   0.00140
   D17        3.11801  -0.00001   0.00006   0.00081   0.00087   3.11888
   D18       -0.02814   0.00000  -0.00007   0.00112   0.00105  -0.02709
   D19        0.00154   0.00000  -0.00001   0.00010   0.00008   0.00162
   D20       -3.14143   0.00000  -0.00005   0.00009   0.00004  -3.14139
   D21       -3.13801   0.00000  -0.00001  -0.00002  -0.00002  -3.13804
   D22        0.00220   0.00000  -0.00005  -0.00002  -0.00006   0.00214
   D23       -0.00101   0.00000   0.00002  -0.00017  -0.00015  -0.00116
   D24        3.13985   0.00000  -0.00003  -0.00010  -0.00013   3.13972
   D25       -3.14123   0.00000   0.00006  -0.00017  -0.00011  -3.14134
   D26       -0.00037   0.00000   0.00001  -0.00010  -0.00009  -0.00045
   D27        0.01052   0.00000   0.00018   0.00141   0.00159   0.01211
   D28       -3.13170  -0.00001   0.00016   0.00128   0.00144  -3.13026
   D29       -3.13029  -0.00001   0.00023   0.00133   0.00156  -3.12873
   D30        0.01067  -0.00001   0.00021   0.00120   0.00141   0.01208
   D31       -3.10143   0.00002  -0.00040  -0.00017  -0.00057  -3.10200
   D32        1.06555   0.00001  -0.00034  -0.00032  -0.00066   1.06489
   D33       -0.99326   0.00001  -0.00041  -0.00011  -0.00053  -0.99378
   D34       -3.13584   0.00000  -0.00015   0.00025   0.00010  -3.13574
   D35       -0.00702   0.00000  -0.00003   0.00005   0.00002  -0.00700
   D36        0.00639   0.00000  -0.00013   0.00038   0.00025   0.00663
   D37        3.13520   0.00000  -0.00001   0.00018   0.00017   3.13537
   D38       -3.09808  -0.00003  -0.00068  -0.00092  -0.00160  -3.09968
   D39        0.04891   0.00005   0.00052   0.00145   0.00197   0.05088
   D40        0.05606  -0.00003  -0.00080  -0.00073  -0.00153   0.05453
   D41       -3.08013   0.00005   0.00040   0.00164   0.00204  -3.07809
   D42       -3.03595   0.00003   0.00114   0.00158   0.00271  -3.03324
   D43        0.11709   0.00003   0.00107   0.00177   0.00284   0.11994
   D44        0.10031  -0.00005  -0.00005  -0.00077  -0.00082   0.09949
   D45       -3.02983  -0.00005  -0.00011  -0.00057  -0.00069  -3.03052
   D46       -3.13801   0.00000   0.00000   0.00008   0.00008  -3.13793
   D47        0.00340   0.00000   0.00000   0.00002   0.00003   0.00343
   D48       -0.00711   0.00000   0.00006  -0.00010  -0.00004  -0.00715
   D49        3.13430   0.00000   0.00006  -0.00016  -0.00010   3.13421
   D50        3.13312   0.00000   0.00001  -0.00017  -0.00016   3.13296
   D51        0.00608   0.00000   0.00004  -0.00004   0.00000   0.00608
   D52        0.00304   0.00000  -0.00005   0.00002  -0.00003   0.00301
   D53       -3.12399   0.00000  -0.00003   0.00016   0.00013  -3.12386
   D54        0.00520   0.00000  -0.00003   0.00009   0.00006   0.00526
   D55       -3.13707   0.00000  -0.00003   0.00008   0.00004  -3.13703
   D56       -3.13620   0.00000  -0.00004   0.00015   0.00012  -3.13609
   D57        0.00471   0.00000  -0.00004   0.00014   0.00010   0.00481
   D58        0.00090   0.00000   0.00000   0.00000   0.00000   0.00089
   D59        3.14097   0.00000   0.00000  -0.00002  -0.00002   3.14095
   D60       -3.14002   0.00000   0.00000   0.00001   0.00001  -3.14001
   D61        0.00005   0.00000   0.00000   0.00000  -0.00001   0.00005
   D62       -0.00487   0.00000   0.00001  -0.00007  -0.00007  -0.00493
   D63        3.13436   0.00000   0.00000  -0.00008  -0.00008   3.13428
   D64        3.13817   0.00000   0.00001  -0.00006  -0.00005   3.13812
   D65       -0.00579   0.00000   0.00001  -0.00007  -0.00006  -0.00585
   D66       -0.00061   0.00000   0.00004   0.00002   0.00005  -0.00055
   D67        3.13950   0.00000   0.00004   0.00000   0.00004   3.13954
   D68        0.00286   0.00000   0.00002   0.00006   0.00008   0.00294
   D69        3.13027   0.00000   0.00000  -0.00007  -0.00007   3.13020
   D70       -3.13631   0.00000   0.00002   0.00007   0.00010  -3.13621
   D71       -0.00890   0.00000   0.00000  -0.00006  -0.00006  -0.00896
   D72        0.78609   0.00000  -0.00027  -0.00840  -0.00867   0.77742
   D73       -2.39123  -0.00001   0.00006  -0.00935  -0.00929  -2.40052
   D74        2.89936   0.00001  -0.00033  -0.00824  -0.00857   2.89079
   D75       -0.27796   0.00000   0.00000  -0.00919  -0.00918  -0.28714
   D76       -1.30547  -0.00001  -0.00022  -0.00863  -0.00885  -1.31432
   D77        1.80040  -0.00002   0.00012  -0.00958  -0.00946   1.79093
   D78        3.10675  -0.00001   0.00033  -0.00094  -0.00061   3.10614
   D79       -0.05032  -0.00001   0.00036  -0.00101  -0.00065  -0.05097
   D80        0.00050   0.00000   0.00000   0.00001   0.00001   0.00051
   D81        3.12661   0.00000   0.00003  -0.00007  -0.00003   3.12658
   D82       -3.09818   0.00001  -0.00035   0.00097   0.00062  -3.09757
   D83        0.04635   0.00001  -0.00033   0.00099   0.00066   0.04701
   D84        0.00821   0.00000  -0.00003   0.00004   0.00002   0.00823
   D85       -3.13044   0.00000  -0.00001   0.00007   0.00006  -3.13038
   D86       -0.00781   0.00000   0.00001  -0.00004  -0.00003  -0.00783
   D87        3.13522   0.00000   0.00003  -0.00010  -0.00008   3.13515
   D88       -3.13378   0.00000  -0.00002   0.00004   0.00002  -3.13376
   D89        0.00925   0.00000  -0.00001  -0.00002  -0.00003   0.00922
   D90        0.00641   0.00000   0.00001   0.00001   0.00002   0.00643
   D91       -3.13959   0.00000   0.00004  -0.00011  -0.00007  -3.13966
   D92       -3.13662   0.00000  -0.00001   0.00007   0.00007  -3.13656
   D93        0.00056   0.00000   0.00002  -0.00004  -0.00002   0.00054
   D94        0.00226   0.00000  -0.00003   0.00005   0.00001   0.00227
   D95        3.13364   0.00000   0.00004  -0.00012  -0.00008   3.13356
   D96       -3.13492   0.00000  -0.00007   0.00016   0.00010  -3.13483
   D97       -0.00354   0.00000   0.00001   0.00000   0.00001  -0.00354
   D98       -0.00963   0.00000   0.00005  -0.00007  -0.00003  -0.00966
   D99        3.12902   0.00000   0.00003  -0.00010  -0.00007   3.12895
   D100      -3.14106   0.00000  -0.00003   0.00009   0.00006  -3.14099
   D101      -0.00240   0.00000  -0.00005   0.00006   0.00002  -0.00239
         Item               Value     Threshold  Converged?
 Maximum Force            0.000088     0.000450     YES
 RMS     Force            0.000015     0.000300     YES
 Maximum Displacement     0.022409     0.001800     NO 
 RMS     Displacement     0.004661     0.001200     NO 
 Predicted change in Energy=-5.682753D-07
 GradGradGradGradGradGradGradGradGradGradGradGradGradGradGradGradGradGrad

                          Input orientation:                          
 ---------------------------------------------------------------------
 Center     Atomic      Atomic             Coordinates (Angstroms)
 Number     Number       Type             X           Y           Z
 ---------------------------------------------------------------------
      1          6           0       -0.000161   -0.012845   -0.000904
      2          6           0       -0.000777   -0.015260    1.381554
      3          6           0        1.213126   -0.004286    2.092730
      4          6           0        2.424287    0.009523    1.390635
      5          6           0        2.405991    0.010739   -0.003212
      6          6           0        1.207277    0.000445   -0.734604
      7          8           0        1.097732   -0.003152    3.448616
      8          6           0        1.268381    0.004835   -2.190462
      9          6           0        0.244517    0.010336   -3.069643
     10          6           0        0.518853    0.006639   -4.525874
     11          6           0       -0.626840    0.067520   -5.487894
     12          6           0       -0.332977   -0.072657   -6.854360
     13          6           0       -1.332545   -0.024559   -7.815507
     14          6           0       -2.664359    0.173688   -7.425348
     15          6           0       -2.978939    0.323052   -6.069877
     16          6           0       -1.968128    0.267885   -5.117735
     17          8           0       -3.690899    0.231362   -8.318660
     18          6           0        2.290060   -0.020742    4.238616
     19          6           0        1.908383   -0.072298    5.697365
     20          6           0        0.903180   -0.940298    6.141949
     21          6           0        0.584552   -1.013586    7.496700
     22          6           0        1.272524   -0.227685    8.424506
     23          6           0        2.275636    0.637503    7.988670
     24          6           0        2.586919    0.717773    6.630076
     25          8           0        1.673314   -0.055193   -4.953161
     26          1           0       -0.951009   -0.022069   -0.524248
     27          1           0       -0.927503   -0.024598    1.945603
     28          1           0        3.374244    0.021094    1.910803
     29          1           0        3.349863    0.021298   -0.541577
     30          1           0        2.265637    0.004290   -2.628364
     31          1           0       -0.783657    0.005516   -2.726425
     32          1           0        0.703840   -0.220047   -7.136095
     33          1           0       -1.086985   -0.139307   -8.869460
     34          1           0       -4.013673    0.482512   -5.786241
     35          1           0       -2.241088    0.397726   -4.076476
     36          1           0       -3.341165    0.116759   -9.212524
     37          1           0        2.894488    0.872189    4.031699
     38          1           0        2.890507   -0.900909    3.964024
     39          1           0        0.364543   -1.544940    5.419248
     40          1           0       -0.200848   -1.685730    7.830025
     41          1           0        1.024260   -0.287274    9.480106
     42          1           0        2.810265    1.257446    8.702347
     43          1           0        3.361588    1.402287    6.293257
 ---------------------------------------------------------------------
                    Distance matrix (angstroms):
                    1          2          3          4          5
     1  C    0.000000
     2  C    1.382460   0.000000
     3  C    2.419801   1.406930   0.000000
     4  C    2.795501   2.425208   1.400014   0.000000
     5  C    2.406268   2.776830   2.411664   1.393968   0.000000
     6  C    1.412940   2.436753   2.827344   2.449048   1.404263
     7  O    3.620034   2.340858   1.360788   2.448509   3.691456
     8  C    2.530548   3.790839   4.283557   3.763030   2.465411
     9  C    3.078565   4.458024   5.252476   4.964421   3.751662
    10  C    4.554680   5.930278   6.654926   6.215767   4.900589
    11  C    5.523246   6.898414   7.801057   7.525085   6.267617
    12  C    6.861793   8.242811   9.079952   8.694205   7.378829
    13  C    7.927383   9.292987  10.230054   9.943238   8.660822
    14  C    7.890192   9.202820  10.279123  10.180512   8.990167
    15  C    6.768927   8.031670   9.181977   9.216962   8.117846
    16  C    5.489414   6.796425   7.885763   7.856141   6.734789
    17  O    9.103091  10.381328  11.510953  11.476721  10.313458
    18  C    4.818579   3.662072   2.401018   2.851303   4.243529
    19  C    6.009688   4.719574   3.671704   4.338292   5.722857
    20  C    6.277805   4.932970   4.167536   5.078475   6.397337
    21  C    7.586662   6.223687   5.533235   6.458747   7.785600
    22  C    8.523697   7.160279   6.335994   7.131491   8.506940
    23  C    8.332796   7.018699   6.025191   6.629519   8.017481
    24  C    7.155185   5.897499   4.795434   5.289594   6.673316
    25  O    5.227539   6.552311   7.061086   6.388418   5.004313
    26  H    1.085397   2.129569   3.395934   3.880773   3.397352
    27  H    2.156152   1.084923   2.145775   3.397594   3.861516
    28  H    3.878451   3.416460   2.168911   1.083110   2.145012
    29  H    3.393546   3.863491   3.392031   2.142493   1.086667
    30  H    3.469535   4.606132   4.837000   4.022132   2.628909
    31  H    2.835960   4.181964   5.216463   5.219301   4.194016
    32  H    7.172831   8.549197   9.245384   8.701596   7.336798
    33  H    8.935797  10.309147  11.201711  10.845309   9.530674
    34  H    7.058596   8.229726   9.467554   9.652906   8.653212
    35  H    4.669112   5.914358   7.081829   7.197619   6.191653
    36  H    9.799646  11.109010  12.188723  12.069752  10.855987
    37  H    5.042238   4.024102   2.711971   2.817890   4.154664
    38  H    4.986508   3.976563   2.668198   2.769220   4.099368
    39  H    5.644322   4.333169   3.762902   4.784206   5.999227
    40  H    8.010135   6.664329   6.143544   7.157580   8.428120
    41  H    9.540142   8.167695   7.395207   8.215091   9.588082
    42  H    9.233564   7.944542   6.915914   7.427478   8.803663
    43  H    7.274641   6.118804   4.923288   5.182087   6.518826
                    6          7          8          9         10
     6  C    0.000000
     7  O    4.184656   0.000000
     8  C    1.457146   5.641665   0.000000
     9  C    2.525750   6.573877   1.349551   0.000000
    10  C    3.853270   7.995479   2.452742   1.481851   0.000000
    11  C    5.095317   9.101668   3.803795   2.571084   1.497265
    12  C    6.311033  10.402070   4.931764   3.829422   2.480675
    13  C    7.522666  11.523331   6.197323   5.001156   3.774961
    14  C    7.732117  11.507723   6.549733   5.240268   4.309025
    15  C    6.789228  10.359892   5.761150   4.414732   3.836484
    16  C    5.419092   9.102490   4.371855   3.026022   2.569752
    17  O    9.031244  12.706485   7.886735   6.564186   5.670779
    18  C    5.089773   1.430404   6.509802   7.589194   8.941712
    19  C    6.470477   2.391404   7.914125   8.923885  10.317541
    20  C    6.947262   2.858345   8.393790   9.283909  10.716661
    21  C    8.316875   4.203726   9.764523  10.621282  12.065963
    22  C    9.162183   4.984019  10.617515  11.542483  12.974408
    23  C    8.811512   4.733919  10.248393  11.260776  12.652987
    24  C    7.527050   3.585959   8.946994  10.003592  11.368281
    25  O    4.244585   8.421630   2.792862   2.365036   1.232550
    26  H    2.168630   4.470049   2.775371   2.812360   4.263136
    27  H    3.426576   2.522119   4.682927   5.150489   6.631209
    28  H    3.419701   2.747356   4.610347   5.882189   7.041610
    29  H    2.151365   4.581958   2.655496   4.004299   4.887684
    30  H    2.169439   6.188193   1.089163   2.068741   2.579109
    31  H    2.816238   6.455295   2.120877   1.083957   2.221384
    32  H    6.425041  10.594258   4.982828   4.098791   2.626569
    33  H    8.453345  12.511056   7.083611   5.952576   4.633223
    34  H    7.280779  10.566215   6.407644   5.072971   4.728506
    35  H    4.818419   8.242295   4.003472   2.709615   2.823505
    36  H    9.621693  13.417252   8.400583   7.113608   6.072607
    37  H    5.130718   2.081956   6.489361   7.628512   8.923277
    38  H    5.071765   2.070182   6.428791   7.569947   8.861532
    39  H    6.400649   2.607310   7.818338   8.631023  10.066611
    40  H    8.841881   4.869715  10.267755  11.039825  12.492010
    41  H   10.220401   6.038626  11.676775  12.577471  14.018177
    42  H    9.654308   5.667766  11.072476  12.112724  13.483357
    43  H    7.483117   3.897728   8.849173   9.965819  11.273090
                   11         12         13         14         15
    11  C    0.000000
    12  C    1.404718   0.000000
    13  C    2.433984   1.387535   0.000000
    14  C    2.813625   2.412894   1.401876   0.000000
    15  C    2.436467   2.788031   2.424597   1.399490   0.000000
    16  C    1.405780   2.409472   2.787017   2.412196   1.389732
    17  O    4.174750   3.675900   2.424973   1.362026   2.360577
    18  C   10.154856  11.398997  12.586706  12.674074  11.582123
    19  C   11.469827  12.750275  13.896173  13.898780  12.747949
    20  C   11.773271  13.083766  14.165013  14.072663  12.876163
    21  C   13.085715  14.411111  15.463412  15.317721  14.090318
    22  C   14.044558  15.363769  16.448880  16.336401  15.115071
    23  C   13.797356  15.087237  16.224343  16.192919  15.011734
    24  C   12.553735  13.819573  14.986264  15.014223  13.871675
    25  O    2.364679   2.764067   4.150802   4.997951   4.799332
    26  H    4.975027   6.360412   7.301235   7.113303   5.914863
    27  H    7.440146   8.820154   9.769510   9.532613   8.281133
    28  H    8.411394   9.517371  10.805418  11.119880  10.205164
    29  H    6.346838   7.309129   8.650844   9.142232   8.408739
    30  H    4.067842   4.961629   6.313018   6.880743   6.281019
    31  H    2.766613   4.153200   5.118685   5.064109   4.012326
    32  H    2.137748   1.084475   2.155615   3.403448   3.872291
    33  H    3.418991   2.152579   1.088248   2.161373   3.410415
    34  H    3.425182   3.872547   3.400513   2.145389   1.084689
    35  H    2.169547   3.402762   3.870933   3.382942   2.126887
    36  H    4.608997   3.827011   2.450751   1.911885   3.170173
    37  H   10.181842  11.393663  12.610640  12.753534  11.697886
    38  H   10.131551  11.318758  12.544301  12.717275  11.688782
    39  H   11.070168  12.381260  13.429460  13.308327  12.110667
    40  H   13.439580  14.773308  15.774121  15.564470  14.316433
    41  H   15.062969  16.392161  17.457428  17.309327  16.068605
    42  H   14.648978  15.926716  17.077643  17.066007  15.893601
    43  H   12.509384  13.736269  14.937469  15.034015  13.936072
                   16         17         18         19         20
    16  C    0.000000
    17  O    3.635271   0.000000
    18  C   10.283812  13.911169   0.000000
    19  C   11.493888  15.096130   1.508736   0.000000
    20  C   11.682662  15.218001   2.528180   1.400540   0.000000
    21  C   12.933767  16.430307   3.809148   2.424078   1.393645
    22  C   13.933402  17.469399   4.312757   2.804596   2.419566
    23  C   13.781292  17.369327   3.807413   2.426678   2.789887
    24  C   12.608010  16.220737   2.520438   1.398060   2.412974
    25  O    3.659449   6.339044   9.212509  10.653134  11.156970
    26  H    4.713675   8.265839   5.761024   6.847417   6.979924
    27  H    7.145572  10.632826   3.951029   4.703216   4.668963
    28  H    8.831885  12.433921   2.568252   4.061469   4.993298
    29  H    7.020189  10.492830   4.896448   6.403986   7.181953
    30  H    4.918457   8.240835   6.867069   8.333742   8.925632
    31  H    2.681450   6.306834   7.613161   8.843833   9.076785
    32  H    3.383972   4.573396  11.486509  12.890712  13.299058
    33  H    3.875262   2.687218  13.536622  14.871756  15.163928
    34  H    2.162688   2.565231  11.852766  12.932586  12.980044
    35  H    1.084245   4.486174   9.478775  10.628594  10.774643
    36  H    4.321500   0.966664  14.582962  15.808172  15.965327
    37  H   10.378939  14.011044   1.097940   2.153811   3.421048
    38  H   10.365846  13.980746   1.100287   2.157692   2.948623
    39  H   10.943295  14.433710   2.724828   2.151620   1.085366
    40  H   13.213038  16.632370   4.677074   3.405914   2.150383
    41  H   14.911726  18.420038   5.398751   3.890632   3.403586
    42  H   14.656294  18.249183   4.672180   3.407569   3.875912
    43  H   12.645295  16.267045   2.719326   2.154366   3.399172
                   21         22         23         24         25
    21  C    0.000000
    22  C    1.397057   0.000000
    23  C    2.414103   1.394538   0.000000
    24  C    2.785339   2.416920   1.396108   0.000000
    25  O   12.534072  13.384780  12.974344  11.644892   0.000000
    26  H    8.226582   9.223154   9.127762   8.015525   5.148149
    27  H    5.837729   6.845257   6.871472   5.903097   7.372796
    28  H    6.328917   6.848901   6.207042   4.834954   7.071985
    29  H    8.563401   9.206953   8.619675   7.245673   4.720035
    30  H   10.314021  11.099820  10.635904   9.291447   2.399805
    31  H   10.364499  11.341319  11.161180   9.970567   3.316436
    32  H   14.654782  15.570991  15.230379  13.925981   2.394214
    33  H   16.474513  17.454407  17.207765  15.952046   4.792048
    34  H   14.135717  15.178721  15.143566  14.063715   5.772779
    35  H   11.996435  13.000429  12.885109  11.749142   4.036862
    36  H   17.201369  18.233748  18.102505  16.926056   6.581546
    37  H    4.571453   4.810118   4.011941   2.621069   9.114769
    38  H    4.220181   4.792390   4.352305   3.133709   9.039523
    39  H    2.155586   3.404580   3.875212   3.394839  10.560260
    40  H    1.086156   2.156415   3.399345   3.871478  13.022326
    41  H    2.157492   1.086038   2.155351   3.402161  14.449717
    42  H    3.400731   2.155797   1.086045   2.153007  13.765484
    43  H    3.872550   3.400474   2.153744   1.087253  11.465445
                   26         27         28         29         30
    26  H    0.000000
    27  H    2.469964   0.000000
    28  H    4.963784   4.302130   0.000000
    29  H    4.301126   4.948134   2.452502   0.000000
    30  H    3.843801   5.578364   4.672614   2.351704   0.000000
    31  H    2.208699   4.674339   6.228344   4.675446   3.050871
    32  H    6.818669   9.229124   9.435866   7.109666   4.775896
    33  H    8.347143  10.816847  11.668006   9.437428   7.086041
    34  H    6.109262   8.340445  10.678891   9.052120   7.044900
    35  H    3.802480   6.178131   8.217135   6.625401   4.749988
    36  H    9.012117  11.417073  12.993624  10.952821   8.648702
    37  H    6.028615   4.445631   2.335108   4.673996   6.745750
    38  H    5.972787   4.406715   2.302131   4.621895   6.683518
    39  H    6.274946   4.005874   4.880569   6.848115   8.412985
    40  H    8.551279   6.157418   7.122620   9.252309  10.877389
    41  H   10.200937   7.787626   7.931700  10.292609  12.175429
    42  H   10.045615   7.827396   6.926161   9.341807  11.412801
    43  H    8.191804   6.271714   4.594971   6.972964   9.096747
                   31         32         33         34         35
    31  H    0.000000
    32  H    4.659261   0.000000
    33  H    6.152224   2.493617   0.000000
    34  H    4.474707   4.956876   4.296324   0.000000
    35  H    2.024986   4.291330   4.959138   2.464253   0.000000
    36  H    6.972998   4.559282   2.294469   3.510763   5.260048
    37  H    7.742875  11.432915  13.539393  12.011098   9.609462
    38  H    7.686559  11.333919  13.457295  12.027020   9.626492
    39  H    8.371037  12.629612  14.430866  12.200095  10.036535
    40  H   10.706942  15.064907  16.794328  14.305300  12.258390
    41  H   12.343164  16.619427  18.471216  16.094555  13.961112
    42  H   12.045764  16.046067  18.052918  16.033896  13.767846
    43  H   10.024404  13.785612  15.876847  14.182902  11.829221
                   36         37         38         39         40
    36  H    0.000000
    37  H   14.658223   0.000000
    38  H   14.611324   1.774393   0.000000
    39  H   15.184935   3.764097   2.985456   0.000000
    40  H   17.422945   5.527325   5.011824   2.480188   0.000000
    41  H   19.199859   5.875989   5.855476   4.302037   2.485827
    42  H   18.975876   4.687266   5.207364   4.961216   4.300004
    43  H   16.941331   2.369352   3.309374   4.293288   4.958674
                   41         42         43
    41  H    0.000000
    42  H    2.486139   0.000000
    43  H    4.298108   2.475611   0.000000
 Stoichiometry    C22H18O3
 Framework group  C1[X(C22H18O3)]
 Deg. of freedom   123
 Full point group                 C1      NOp   1
 Largest Abelian subgroup         C1      NOp   1
 Largest concise Abelian subgroup C1      NOp   1
                         Standard orientation:                         
 ---------------------------------------------------------------------
 Center     Atomic      Atomic             Coordinates (Angstroms)
 Number     Number       Type             X           Y           Z
 ---------------------------------------------------------------------
      1          6           0        0.223147   -0.466045    0.015577
      2          6           0        1.564472   -0.798832    0.051563
      3          6           0        2.547331    0.207429    0.021907
      4          6           0        2.158150    1.550646   -0.044004
      5          6           0        0.801227    1.867773   -0.080562
      6          6           0       -0.197593    0.881127   -0.051544
      7          8           0        3.835121   -0.230020    0.066405
      8          6           0       -1.595572    1.290276   -0.090603
      9          6           0       -2.695837    0.509453   -0.058610
     10          6           0       -4.042598    1.124905   -0.116353
     11          6           0       -5.253472    0.248951   -0.025312
     12          6           0       -6.506379    0.854269   -0.217793
     13          6           0       -7.680950    0.119022   -0.146755
     14          6           0       -7.626738   -1.254555    0.128209
     15          6           0       -6.389636   -1.876805    0.330588
     16          6           0       -5.220984   -1.128887    0.251682
     17          8           0       -8.742140   -2.031709    0.212031
     18          6           0        4.889686    0.734829    0.011492
     19          6           0        6.213814    0.011705    0.019478
     20          6           0        6.415603   -1.116979   -0.784801
     21          6           0        7.654358   -1.755211   -0.804532
     22          6           0        8.708908   -1.268128   -0.028360
     23          6           0        8.515144   -0.143727    0.773460
     24          6           0        7.270783    0.488694    0.800420
     25          8           0       -4.177678    2.343009   -0.247336
     26          1           0       -0.513997   -1.262380    0.039114
     27          1           0        1.888279   -1.832980    0.103965
     28          1           0        2.891962    2.347010   -0.065242
     29          1           0        0.506461    2.912438   -0.131885
     30          1           0       -1.779807    2.361936   -0.152878
     31          1           0       -2.610858   -0.569724   -0.002781
     32          1           0       -6.527337    1.918693   -0.424308
     33          1           0       -8.642654    0.603859   -0.302774
     34          1           0       -6.366512   -2.939005    0.549102
     35          1           0       -4.278436   -1.636401    0.423780
     36          1           0       -9.523366   -1.484353    0.055421
     37          1           0        4.821420    1.419376    0.867183
     38          1           0        4.781310    1.334365   -0.904719
     39          1           0        5.593400   -1.498638   -1.381742
     40          1           0        7.798306   -2.633384   -1.427290
     41          1           0        9.674165   -1.765560   -0.046214
     42          1           0        9.327394    0.237057    1.385625
     43          1           0        7.120670    1.357986    1.435964
 ---------------------------------------------------------------------
 Rotational constants (GHZ):      0.9067081      0.0488020      0.0467010
 Standard basis: 6-31G(d,p) (6D, 7F)
 There are   465 symmetry adapted basis functions of A   symmetry.
 Integral buffers will be    262144 words long.
 Raffenetti 2 integral format.
 Two-electron integral symmetry is turned on.
   465 basis functions,   826 primitive gaussians,   465 cartesian basis functions
    87 alpha electrons       87 beta electrons
       nuclear repulsion energy      1771.9914075360 Hartrees.
 NAtoms=   43 NActive=   43 NUniq=   43 SFac= 7.50D-01 NAtFMM=   80 NAOKFM=F Big=F
 One-electron integrals computed using PRISM.
 NBasis=   465 RedAO= T  NBF=   465
 NBsUse=   465 1.00D-06 NBFU=   465
 Initial guess read from the read-write file.
 B after Tr=     0.000000    0.000000    0.000000
         Rot=    1.000000    0.000000    0.000000    0.000000 Ang=   0.00 deg.
 Initial guess orbital symmetries:
       Occupied  (A) (A) (A) (A) (A) (A) (A) (A) (A) (A) (A) (A)
                 (A) (A) (A) (A) (A) (A) (A) (A) (A) (A) (A) (A)
                 (A) (A) (A) (A) (A) (A) (A) (A) (A) (A) (A) (A)
                 (A) (A) (A) (A) (A) (A) (A) (A) (A) (A) (A) (A)
                 (A) (A) (A) (A) (A) (A) (A) (A) (A) (A) (A) (A)
                 (A) (A) (A) (A) (A) (A) (A) (A) (A) (A) (A) (A)
                 (A) (A) (A) (A) (A) (A) (A) (A) (A) (A) (A) (A)
                 (A) (A) (A)
       Virtual   (A) (A) (A) (A) (A) (A) (A) (A) (A) (A) (A) (A)
                 (A) (A) (A) (A) (A) (A) (A) (A) (A) (A) (A) (A)
                 (A) (A) (A) (A) (A) (A) (A) (A) (A) (A) (A) (A)
                 (A) (A) (A) (A) (A) (A) (A) (A) (A) (A) (A) (A)
                 (A) (A) (A) (A) (A) (A) (A) (A) (A) (A) (A) (A)
                 (A) (A) (A) (A) (A) (A) (A) (A) (A) (A) (A) (A)
                 (A) (A) (A) (A) (A) (A) (A) (A) (A) (A) (A) (A)
                 (A) (A) (A) (A) (A) (A) (A) (A) (A) (A) (A) (A)
                 (A) (A) (A) (A) (A) (A) (A) (A) (A) (A) (A) (A)
                 (A) (A) (A) (A) (A) (A) (A) (A) (A) (A) (A) (A)
                 (A) (A) (A) (A) (A) (A) (A) (A) (A) (A) (A) (A)
                 (A) (A) (A) (A) (A) (A) (A) (A) (A) (A) (A) (A)
                 (A) (A) (A) (A) (A) (A) (A) (A) (A) (A) (A) (A)
                 (A) (A) (A) (A) (A) (A) (A) (A) (A) (A) (A) (A)
                 (A) (A) (A) (A) (A) (A) (A) (A) (A) (A) (A) (A)
                 (A) (A) (A) (A) (A) (A) (A) (A) (A) (A) (A) (A)
                 (A) (A) (A) (A) (A) (A) (A) (A) (A) (A) (A) (A)
                 (A) (A) (A) (A) (A) (A) (A) (A) (A) (A) (A) (A)
                 (A) (A) (A) (A) (A) (A) (A) (A) (A) (A) (A) (A)
                 (A) (A) (A) (A) (A) (A) (A) (A) (A) (A) (A) (A)
                 (A) (A) (A) (A) (A) (A) (A) (A) (A) (A) (A) (A)
                 (A) (A) (A) (A) (A) (A) (A) (A) (A) (A) (A) (A)
                 (A) (A) (A) (A) (A) (A) (A) (A) (A) (A) (A) (A)
                 (A) (A) (A) (A) (A) (A) (A) (A) (A) (A) (A) (A)
                 (A) (A) (A) (A) (A) (A) (A) (A) (A) (A) (A) (A)
                 (A) (A) (A) (A) (A) (A) (A) (A) (A) (A) (A) (A)
                 (A) (A) (A) (A) (A) (A) (A) (A) (A) (A) (A) (A)
                 (A) (A) (A) (A) (A) (A) (A) (A) (A) (A) (A) (A)
                 (A) (A) (A) (A) (A) (A) (A) (A) (A) (A) (A) (A)
                 (A) (A) (A) (A) (A) (A) (A) (A) (A) (A) (A) (A)
                 (A) (A) (A) (A) (A) (A) (A) (A) (A) (A) (A) (A)
                 (A) (A) (A) (A) (A) (A)
 Harris functional with IExCor=  402 diagonalized for initial guess.
 ExpMin= 1.61D-01 ExpMax= 5.48D+03 ExpMxC= 8.25D+02 IAcc=1 IRadAn=         1 AccDes= 0.00D+00
 HarFok:  IExCor=  402 AccDes= 0.00D+00 IRadAn=         1 IDoV= 1
 ScaDFX=  1.000000  1.000000  1.000000  1.000000
 FoFCou: FMM=F IPFlag=           0 FMFlag=      100000 FMFlg1=           0
         NFxFlg=           0 DoJE=T BraDBF=F KetDBF=T FulRan=T
         Omega=  0.000000  0.000000  1.000000  0.000000  0.000000 ICntrl=     500 IOpCl=  0
         NMat0=    1 NMatS0=    1 NMatT0=    0 NMatD0=    1 NMtDS0=    0 NMtDT0=    0
         I1Cent=           4 NGrid=           0.
 Petite list used in FoFCou.
 Requested convergence on RMS density matrix=1.00D-08 within 128 cycles.
 Requested convergence on MAX density matrix=1.00D-06.
 Requested convergence on             energy=1.00D-06.
 No special actions if energy rises.
 Integral accuracy reduced to 1.0D-05 until final iterations.
 Initial convergence to 1.0D-05 achieved.  Increase integral accuracy.
 SCF Done:  E(RB3LYP) =  -1074.86483084     A.U. after    9 cycles
             Convg  =    0.5142D-08             -V/T =  2.0095
 Calling FoFJK, ICntrl=      2127 FMM=F ISym2X=0 I1Cent= 0 IOpClX= 0 NMat=1 NMatS=1 NMatT=0.
 ***** Axes restored to original set *****
 -------------------------------------------------------------------
 Center     Atomic                   Forces (Hartrees/Bohr)
 Number     Number              X              Y              Z
 -------------------------------------------------------------------
      1        6          -0.000008082    0.000006550   -0.000009596
      2        6          -0.000002279    0.000002601    0.000015834
      3        6          -0.000015927   -0.000027516   -0.000012244
      4        6           0.000012873   -0.000001741    0.000015923
      5        6           0.000008568    0.000000384    0.000001196
      6        6          -0.000000644   -0.000004715    0.000000222
      7        8           0.000072697    0.000036885    0.000012472
      8        6          -0.000007876    0.000014821   -0.000005270
      9        6           0.000018665    0.000077522    0.000043199
     10        6          -0.000036713   -0.000234465    0.000009337
     11        6           0.000026448    0.000054459   -0.000049362
     12        6           0.000024580    0.000018577    0.000029984
     13        6          -0.000013462   -0.000001686   -0.000028606
     14        6           0.000022109   -0.000000293    0.000035711
     15        6          -0.000025981   -0.000007294   -0.000012122
     16        6          -0.000026352    0.000010263    0.000021952
     17        8           0.000028054   -0.000017865   -0.000062052
     18        6          -0.000039280    0.000017699   -0.000038016
     19        6          -0.000081592   -0.000078571   -0.000001065
     20        6          -0.000009034   -0.000027704   -0.000012026
     21        6           0.000026868    0.000019368    0.000023656
     22        6          -0.000030718   -0.000032494    0.000021587
     23        6           0.000020679    0.000006246   -0.000023800
     24        6           0.000030369    0.000017873   -0.000006846
     25        8           0.000014617    0.000088981   -0.000012474
     26        1           0.000004611   -0.000004059    0.000004603
     27        1           0.000006344   -0.000005479   -0.000007482
     28        1          -0.000008529    0.000017581   -0.000005649
     29        1          -0.000006861    0.000006544    0.000002099
     30        1          -0.000002048    0.000019413    0.000001227
     31        1          -0.000007672   -0.000008684   -0.000026329
     32        1          -0.000006528    0.000006554   -0.000005130
     33        1          -0.000002795    0.000004302    0.000013162
     34        1           0.000006251   -0.000011994   -0.000006353
     35        1           0.000023242   -0.000002594   -0.000001231
     36        1          -0.000028936    0.000007925    0.000049303
     37        1          -0.000000102    0.000000177    0.000010542
     38        1           0.000008816    0.000014489    0.000015631
     39        1           0.000015697    0.000020917    0.000008839
     40        1           0.000006937   -0.000006665   -0.000005602
     41        1           0.000003394   -0.000005973   -0.000009094
     42        1          -0.000008331   -0.000001419   -0.000003930
     43        1          -0.000012077    0.000011079    0.000007798
 -------------------------------------------------------------------
 Cartesian Forces:  Max     0.000234465 RMS     0.000031984

 GradGradGradGradGradGradGradGradGradGradGradGradGradGradGradGradGradGrad
 Berny optimization.
 Using GEDIIS/GDIIS optimizer.
 Internal  Forces:  Max     0.000093007 RMS     0.000016652
 Search for a local minimum.
 Step number   4 out of a maximum of  227
 All quantities printed in internal units (Hartrees-Bohrs-Radians)
 Mixed Optimization -- En-DIIS/RFO-DIIS
 Swaping is turned off.
 Update second derivatives using D2CorX and points    1    2    3    4
 DE=  7.79D-07 DEPred=-5.68D-07 R=-1.37D+00
 Trust test=-1.37D+00 RLast= 2.30D-02 DXMaxT set to 7.50D-02
     Eigenvalues ---    0.00026   0.00821   0.01019   0.01306   0.01339
     Eigenvalues ---    0.01555   0.01645   0.01777   0.01902   0.01988
     Eigenvalues ---    0.02031   0.02041   0.02061   0.02089   0.02089
     Eigenvalues ---    0.02096   0.02104   0.02118   0.02120   0.02123
     Eigenvalues ---    0.02127   0.02129   0.02139   0.02141   0.02143
     Eigenvalues ---    0.02146   0.02148   0.02151   0.02152   0.02157
     Eigenvalues ---    0.02169   0.02174   0.02185   0.02195   0.02203
     Eigenvalues ---    0.02222   0.02755   0.04521   0.06396   0.07378
     Eigenvalues ---    0.11409   0.13902   0.15990   0.15999   0.15999
     Eigenvalues ---    0.15999   0.16000   0.16000   0.16000   0.16000
     Eigenvalues ---    0.16000   0.16000   0.16000   0.16000   0.16000
     Eigenvalues ---    0.16001   0.16010   0.16483   0.21977   0.22000
     Eigenvalues ---    0.22000   0.22001   0.22005   0.22040   0.22245
     Eigenvalues ---    0.22958   0.22985   0.23479   0.24000   0.24047
     Eigenvalues ---    0.24943   0.25000   0.25000   0.25000   0.25000
     Eigenvalues ---    0.25017   0.25614   0.31322   0.31854   0.33639
     Eigenvalues ---    0.33898   0.34324   0.34522   0.34924   0.35056
     Eigenvalues ---    0.35135   0.35207   0.35264   0.35276   0.35283
     Eigenvalues ---    0.35350   0.35398   0.35428   0.35456   0.35504
     Eigenvalues ---    0.35514   0.35632   0.37278   0.38757   0.40931
     Eigenvalues ---    0.41261   0.41621   0.41908   0.41971   0.42014
     Eigenvalues ---    0.43227   0.44628   0.44763   0.45199   0.45339
     Eigenvalues ---    0.45822   0.45937   0.46045   0.46284   0.46473
     Eigenvalues ---    0.46803   0.47672   0.48029   0.52564   0.52817
     Eigenvalues ---    0.55082   0.55665   0.902401000.000001000.00000
     Eigenvalues --- 1000.000001000.000001000.000001000.000001000.00000
     Eigenvalues --- 1000.000001000.000001000.000001000.000001000.00000
     Eigenvalues --- 1000.000001000.000001000.000001000.000001000.00000
     Eigenvalues --- 1000.000001000.000001000.000001000.000001000.00000
     Eigenvalues --- 1000.000001000.000001000.000001000.000001000.00000
     Eigenvalues --- 1000.000001000.000001000.000001000.000001000.00000
     Eigenvalues --- 1000.000001000.000001000.000001000.000001000.00000
     Eigenvalues --- 1000.000001000.000001000.000001000.000001000.00000
     Eigenvalues --- 1000.000001000.000001000.000001000.000001000.00000
     Eigenvalues --- 1000.000001000.000001000.000001000.000001000.00000
     Eigenvalues --- 1000.000001000.000001000.000001000.000001000.00000
     Eigenvalues --- 1000.000001000.000001000.000001000.000001000.00000
     Eigenvalues --- 1000.000001000.000001000.000001000.000001000.00000
     Eigenvalues --- 1000.000001000.000001000.000001000.000001000.00000
     Eigenvalues --- 1000.000001000.000001000.000001000.000001000.00000
     Eigenvalues --- 1000.000001000.000001000.000001000.000001000.00000
     Eigenvalues --- 1000.000001000.000001000.000001000.000001000.00000
     Eigenvalues --- 1000.000001000.000001000.000001000.000001000.00000
     Eigenvalues --- 1000.000001000.00000
 En-DIIS/RFO-DIIS IScMMF=        0 using points:     4    3    2    1
 RFO step:  Lambda=-1.52242285D-07.
 DIIS coeffs:      0.61866      0.54968     -1.22044      1.05210
 Iteration  1 RMS(Cart)=  0.00107299 RMS(Int)=  0.00000025
 Iteration  2 RMS(Cart)=  0.00000073 RMS(Int)=  0.00000006
 Variable       Old X    -DE/DX   Delta X   Delta X   Delta X     New X
                                  (DIIS)     (GDIIS)  (Total)
    R1        2.61247   0.00001   0.00000   0.00001   0.00001   2.61248
    R2        2.67007   0.00000   0.00000   0.00000   0.00000   2.67007
    R3        2.05110  -0.00001   0.00000  -0.00001  -0.00001   2.05109
    R4        2.65871   0.00000   0.00000  -0.00001  -0.00001   2.65871
    R5        2.05021  -0.00001   0.00000  -0.00002  -0.00002   2.05019
    R6        2.64564   0.00000   0.00000   0.00000   0.00000   2.64564
    R7        2.57152   0.00000   0.00000   0.00001   0.00000   2.57152
    R8        2.63422   0.00000   0.00000   0.00000   0.00000   2.63422
    R9        2.04678  -0.00001   0.00000  -0.00002  -0.00002   2.04676
   R10        2.65367   0.00001   0.00000   0.00000   0.00001   2.65368
   R11        2.05350  -0.00001   0.00000  -0.00001  -0.00001   2.05349
   R12        2.75361   0.00000   0.00000   0.00000   0.00000   2.75361
   R13        2.70307  -0.00006   0.00005  -0.00016  -0.00012   2.70295
   R14        2.55028  -0.00001   0.00000  -0.00002  -0.00002   2.55027
   R15        2.05822   0.00000   0.00000   0.00000   0.00000   2.05822
   R16        2.80029   0.00002   0.00000   0.00004   0.00004   2.80033
   R17        2.04838   0.00000   0.00001  -0.00004  -0.00003   2.04836
   R18        2.82942   0.00000  -0.00002   0.00005   0.00003   2.82945
   R19        2.32918   0.00001   0.00001   0.00000   0.00000   2.32918
   R20        2.65453  -0.00002   0.00000  -0.00003  -0.00003   2.65450
   R21        2.65654   0.00001  -0.00001   0.00006   0.00005   2.65659
   R22        2.62206   0.00001   0.00000   0.00002   0.00002   2.62208
   R23        2.04936  -0.00001   0.00000  -0.00001  -0.00001   2.04935
   R24        2.64916   0.00000   0.00000  -0.00001  -0.00001   2.64915
   R25        2.05649  -0.00001   0.00000  -0.00002  -0.00003   2.05646
   R26        2.64465  -0.00001   0.00000  -0.00003  -0.00003   2.64463
   R27        2.57386   0.00001   0.00000   0.00001   0.00001   2.57387
   R28        2.62621   0.00001   0.00000   0.00001   0.00001   2.62622
   R29        2.04977  -0.00001   0.00000  -0.00001  -0.00002   2.04975
   R30        2.04893  -0.00001   0.00001  -0.00005  -0.00004   2.04889
   R31        1.82673  -0.00006  -0.00001  -0.00007  -0.00007   1.82666
   R32        2.85110   0.00001  -0.00002   0.00004   0.00002   2.85112
   R33        2.07481   0.00000  -0.00001   0.00001   0.00000   2.07481
   R34        2.07924  -0.00001  -0.00001   0.00000  -0.00001   2.07923
   R35        2.64664  -0.00001   0.00002  -0.00004  -0.00003   2.64661
   R36        2.64195   0.00002  -0.00001   0.00004   0.00003   2.64198
   R37        2.63361   0.00002  -0.00001   0.00004   0.00003   2.63364
   R38        2.05104  -0.00003   0.00001  -0.00006  -0.00005   2.05099
   R39        2.64005  -0.00002   0.00001  -0.00004  -0.00003   2.64003
   R40        2.05254   0.00000   0.00000  -0.00001  -0.00001   2.05253
   R41        2.63530   0.00002  -0.00001   0.00004   0.00003   2.63533
   R42        2.05231  -0.00001   0.00000  -0.00002  -0.00002   2.05230
   R43        2.63826  -0.00002   0.00001  -0.00004  -0.00003   2.63823
   R44        2.05233  -0.00001   0.00000  -0.00001  -0.00001   2.05232
   R45        2.05461   0.00000  -0.00001   0.00000   0.00000   2.05461
    A1        2.11726   0.00000   0.00000  -0.00001  -0.00001   2.11725
    A2        2.07346   0.00000   0.00000   0.00000   0.00000   2.07346
    A3        2.09246   0.00000   0.00000   0.00001   0.00001   2.09248
    A4        2.10027   0.00000   0.00000   0.00000   0.00000   2.10027
    A5        2.11799   0.00000   0.00000  -0.00002  -0.00001   2.11798
    A6        2.06492   0.00000   0.00000   0.00002   0.00001   2.06494
    A7        2.08633   0.00001   0.00000   0.00002   0.00001   2.08634
    A8        2.01584   0.00000   0.00001   0.00000   0.00000   2.01585
    A9        2.18100  -0.00001  -0.00001  -0.00001  -0.00002   2.18098
   A10        2.08300   0.00000   0.00000  -0.00002  -0.00002   2.08299
   A11        2.11533   0.00000   0.00000   0.00002   0.00002   2.11534
   A12        2.08485   0.00000   0.00000   0.00000   0.00000   2.08485
   A13        2.13175   0.00000   0.00000   0.00001   0.00001   2.13175
   A14        2.07601   0.00000   0.00000   0.00000   0.00000   2.07601
   A15        2.07543   0.00000   0.00000  -0.00001  -0.00001   2.07542
   A16        2.04776   0.00000   0.00000   0.00000   0.00000   2.04776
   A17        2.15877   0.00001   0.00001   0.00001   0.00002   2.15879
   A18        2.07665  -0.00001  -0.00001  -0.00001  -0.00002   2.07664
   A19        2.07100   0.00001  -0.00002   0.00008   0.00006   2.07106
   A20        2.23837   0.00002   0.00001   0.00004   0.00005   2.23842
   A21        2.02650  -0.00001   0.00000  -0.00002  -0.00002   2.02647
   A22        2.01832  -0.00001  -0.00001  -0.00002  -0.00003   2.01829
   A23        2.09409   0.00001   0.00001  -0.00002   0.00000   2.09408
   A24        2.10986   0.00002   0.00001   0.00008   0.00009   2.10995
   A25        2.07916  -0.00003  -0.00003  -0.00006  -0.00009   2.07908
   A26        2.08248  -0.00002  -0.00006   0.00016   0.00010   2.08258
   A27        2.11087   0.00002   0.00005  -0.00008  -0.00003   2.11084
   A28        2.08979   0.00000   0.00002  -0.00008  -0.00006   2.08973
   A29        2.04979   0.00003   0.00004  -0.00003   0.00001   2.04980
   A30        2.17329  -0.00004  -0.00005   0.00003  -0.00002   2.17327
   A31        2.06005   0.00001   0.00002   0.00000   0.00001   2.06006
   A32        2.11727  -0.00001  -0.00001  -0.00001  -0.00002   2.11724
   A33        2.05588   0.00001   0.00001   0.00004   0.00004   2.05592
   A34        2.11004   0.00000   0.00000  -0.00003  -0.00002   2.11002
   A35        2.09036   0.00000   0.00000   0.00000   0.00000   2.09036
   A36        2.09979   0.00000   0.00000   0.00001   0.00001   2.09980
   A37        2.09304   0.00000   0.00000  -0.00001  -0.00001   2.09303
   A38        2.09232   0.00002   0.00001   0.00004   0.00004   2.09236
   A39        2.14060  -0.00001   0.00000  -0.00002  -0.00003   2.14058
   A40        2.05026  -0.00001   0.00000  -0.00002  -0.00002   2.05024
   A41        2.08961  -0.00002   0.00000  -0.00004  -0.00004   2.08956
   A42        2.07531   0.00000   0.00000  -0.00001   0.00000   2.07531
   A43        2.11826   0.00001   0.00000   0.00004   0.00005   2.11831
   A44        2.11675   0.00000  -0.00001   0.00001   0.00001   2.11675
   A45        2.10615  -0.00002  -0.00002  -0.00005  -0.00007   2.10608
   A46        2.06020   0.00002   0.00003   0.00003   0.00006   2.06026
   A47        1.90580   0.00002   0.00001   0.00006   0.00007   1.90588
   A48        1.90027   0.00004  -0.00005   0.00022   0.00017   1.90044
   A49        1.92282  -0.00001   0.00000   0.00004   0.00004   1.92286
   A50        1.90381   0.00000  -0.00002   0.00009   0.00007   1.90388
   A51        1.92759  -0.00001   0.00001  -0.00005  -0.00004   1.92755
   A52        1.93052  -0.00003   0.00003  -0.00021  -0.00018   1.93034
   A53        1.87876   0.00000   0.00003  -0.00009  -0.00006   1.87870
   A54        2.10559   0.00009  -0.00007   0.00033   0.00026   2.10586
   A55        2.09781  -0.00009   0.00008  -0.00037  -0.00030   2.09751
   A56        2.07922   0.00001   0.00000   0.00003   0.00002   2.07925
   A57        2.10048  -0.00001   0.00001  -0.00006  -0.00005   2.10043
   A58        2.08298   0.00000   0.00001  -0.00003  -0.00002   2.08296
   A59        2.09962   0.00002  -0.00002   0.00009   0.00007   2.09969
   A60        2.09834   0.00002  -0.00001   0.00007   0.00006   2.09839
   A61        2.08999  -0.00001   0.00001  -0.00006  -0.00004   2.08995
   A62        2.09485   0.00000   0.00000  -0.00001  -0.00001   2.09484
   A63        2.08941  -0.00001   0.00001  -0.00005  -0.00004   2.08937
   A64        2.09678   0.00001  -0.00001   0.00003   0.00003   2.09681
   A65        2.09699   0.00000   0.00000   0.00001   0.00001   2.09700
   A66        2.09461   0.00000   0.00000   0.00001   0.00001   2.09462
   A67        2.09771   0.00000   0.00000   0.00000   0.00000   2.09772
   A68        2.09082   0.00000   0.00001  -0.00002  -0.00001   2.09080
   A69        2.10425   0.00000   0.00000   0.00000   0.00000   2.10425
   A70        2.08854   0.00001  -0.00001   0.00005   0.00004   2.08858
   A71        2.09039  -0.00001   0.00001  -0.00005  -0.00003   2.09035
    D1        0.00011   0.00000   0.00000  -0.00007  -0.00007   0.00005
    D2        3.14066   0.00000  -0.00001   0.00003   0.00003   3.14069
    D3        3.14099   0.00000   0.00003  -0.00012  -0.00009   3.14090
    D4       -0.00164   0.00000   0.00002  -0.00002   0.00000  -0.00164
    D5        0.00028   0.00000  -0.00002  -0.00002  -0.00004   0.00024
    D6       -3.14057   0.00000  -0.00002  -0.00003  -0.00006  -3.14062
    D7       -3.14059   0.00000  -0.00005   0.00003  -0.00002  -3.14060
    D8        0.00175   0.00000  -0.00005   0.00002  -0.00003   0.00172
    D9        0.00033   0.00000   0.00001   0.00013   0.00014   0.00047
   D10        3.13780   0.00000  -0.00001   0.00010   0.00009   3.13789
   D11       -3.14025   0.00000   0.00002   0.00003   0.00005  -3.14020
   D12       -0.00278   0.00000   0.00000   0.00000   0.00000  -0.00277
   D13       -0.00117   0.00000   0.00000  -0.00010  -0.00010  -0.00127
   D14        3.13845  -0.00001  -0.00002  -0.00020  -0.00022   3.13823
   D15       -3.13822   0.00000   0.00002  -0.00007  -0.00005  -3.13827
   D16        0.00140  -0.00001   0.00000  -0.00017  -0.00017   0.00122
   D17        3.11888  -0.00001  -0.00020  -0.00009  -0.00029   3.11858
   D18       -0.02709  -0.00001  -0.00022  -0.00012  -0.00034  -0.02743
   D19        0.00162   0.00000  -0.00002   0.00000  -0.00001   0.00161
   D20       -3.14139   0.00000   0.00000   0.00004   0.00004  -3.14135
   D21       -3.13804   0.00000   0.00000   0.00011   0.00011  -3.13793
   D22        0.00214   0.00000   0.00001   0.00014   0.00016   0.00230
   D23       -0.00116   0.00000   0.00003   0.00006   0.00008  -0.00108
   D24        3.13972   0.00000   0.00003   0.00007   0.00009   3.13982
   D25       -3.14134   0.00000   0.00001   0.00002   0.00004  -3.14130
   D26       -0.00045   0.00000   0.00002   0.00003   0.00005  -0.00041
   D27        0.01211  -0.00001  -0.00039  -0.00010  -0.00049   0.01162
   D28       -3.13026  -0.00001  -0.00035  -0.00009  -0.00043  -3.13070
   D29       -3.12873  -0.00001  -0.00039  -0.00011  -0.00050  -3.12923
   D30        0.01208  -0.00001  -0.00035  -0.00010  -0.00044   0.01164
   D31       -3.10200   0.00002   0.00017   0.00058   0.00074  -3.10126
   D32        1.06489   0.00001   0.00018   0.00048   0.00066   1.06555
   D33       -0.99378   0.00001   0.00016   0.00051   0.00067  -0.99311
   D34       -3.13574   0.00001   0.00000   0.00017   0.00017  -3.13556
   D35       -0.00700   0.00000   0.00001  -0.00005  -0.00004  -0.00703
   D36        0.00663   0.00000  -0.00004   0.00016   0.00012   0.00675
   D37        3.13537   0.00000  -0.00003  -0.00006  -0.00010   3.13528
   D38       -3.09968   0.00005   0.00077   0.00060   0.00137  -3.09831
   D39        0.05088  -0.00004  -0.00094   0.00046  -0.00048   0.05040
   D40        0.05453   0.00005   0.00076   0.00082   0.00158   0.05611
   D41       -3.07809  -0.00004  -0.00095   0.00067  -0.00027  -3.07836
   D42       -3.03324  -0.00005  -0.00111  -0.00017  -0.00129  -3.03452
   D43        0.11994  -0.00005  -0.00114  -0.00001  -0.00116   0.11878
   D44        0.09949   0.00004   0.00058  -0.00003   0.00055   0.10004
   D45       -3.03052   0.00004   0.00055   0.00013   0.00068  -3.02984
   D46       -3.13793   0.00000  -0.00003   0.00005   0.00002  -3.13791
   D47        0.00343   0.00000  -0.00001   0.00008   0.00006   0.00349
   D48       -0.00715   0.00000  -0.00001  -0.00010  -0.00011  -0.00725
   D49        3.13421   0.00000   0.00001  -0.00007  -0.00006   3.13415
   D50        3.13296   0.00000   0.00005  -0.00004   0.00001   3.13297
   D51        0.00608   0.00000   0.00000   0.00000   0.00000   0.00608
   D52        0.00301   0.00001   0.00002   0.00012   0.00014   0.00315
   D53       -3.12386   0.00000  -0.00003   0.00016   0.00013  -3.12373
   D54        0.00526   0.00000   0.00000   0.00002   0.00002   0.00527
   D55       -3.13703   0.00000   0.00000   0.00004   0.00004  -3.13699
   D56       -3.13609   0.00000  -0.00002  -0.00001  -0.00003  -3.13612
   D57        0.00481   0.00000  -0.00002   0.00001  -0.00001   0.00480
   D58        0.00089   0.00000   0.00000   0.00004   0.00004   0.00093
   D59        3.14095   0.00000   0.00000   0.00003   0.00003   3.14098
   D60       -3.14001   0.00000   0.00000   0.00002   0.00002  -3.13999
   D61        0.00005   0.00000   0.00000   0.00001   0.00001   0.00006
   D62       -0.00493   0.00000   0.00002  -0.00002   0.00000  -0.00494
   D63        3.13428   0.00000   0.00002  -0.00005  -0.00003   3.13426
   D64        3.13812   0.00000   0.00001  -0.00001   0.00001   3.13812
   D65       -0.00585   0.00000   0.00002  -0.00003  -0.00002  -0.00587
   D66       -0.00055   0.00000  -0.00002  -0.00007  -0.00008  -0.00063
   D67        3.13954   0.00000  -0.00001  -0.00008  -0.00009   3.13945
   D68        0.00294   0.00000  -0.00003  -0.00006  -0.00009   0.00285
   D69        3.13020   0.00000   0.00002  -0.00010  -0.00008   3.13012
   D70       -3.13621   0.00000  -0.00003  -0.00003  -0.00007  -3.13628
   D71       -0.00896   0.00000   0.00002  -0.00007  -0.00005  -0.00902
   D72        0.77742   0.00000   0.00215  -0.00275  -0.00060   0.77682
   D73       -2.40052   0.00000   0.00225  -0.00316  -0.00091  -2.40142
   D74        2.89079   0.00002   0.00213  -0.00259  -0.00047   2.89033
   D75       -0.28714   0.00001   0.00223  -0.00300  -0.00077  -0.28792
   D76       -1.31432  -0.00001   0.00218  -0.00287  -0.00069  -1.31500
   D77        1.79093  -0.00001   0.00229  -0.00328  -0.00099   1.78994
   D78        3.10614  -0.00001   0.00011  -0.00050  -0.00039   3.10575
   D79       -0.05097  -0.00001   0.00012  -0.00054  -0.00043  -0.05140
   D80        0.00051   0.00000   0.00000  -0.00008  -0.00008   0.00043
   D81        3.12658   0.00000   0.00001  -0.00013  -0.00012   3.12646
   D82       -3.09757   0.00001  -0.00011   0.00050   0.00039  -3.09718
   D83        0.04701   0.00001  -0.00012   0.00056   0.00043   0.04744
   D84        0.00823   0.00000   0.00000   0.00010   0.00009   0.00832
   D85       -3.13038   0.00000  -0.00002   0.00016   0.00014  -3.13024
   D86       -0.00783   0.00000   0.00000  -0.00002  -0.00001  -0.00784
   D87        3.13515   0.00000   0.00001   0.00000   0.00001   3.13516
   D88       -3.13376   0.00000   0.00000   0.00003   0.00003  -3.13373
   D89        0.00922   0.00000   0.00001   0.00005   0.00005   0.00928
   D90        0.00643   0.00000  -0.00001   0.00010   0.00009   0.00651
   D91       -3.13966   0.00000   0.00001   0.00002   0.00003  -3.13963
   D92       -3.13656   0.00000  -0.00002   0.00008   0.00007  -3.13649
   D93        0.00054   0.00000   0.00000   0.00000   0.00000   0.00055
   D94        0.00227   0.00000   0.00001  -0.00008  -0.00007   0.00220
   D95        3.13356   0.00000   0.00002  -0.00013  -0.00011   3.13346
   D96       -3.13483   0.00000  -0.00001   0.00000  -0.00001  -3.13484
   D97       -0.00354   0.00000   0.00000  -0.00004  -0.00005  -0.00358
   D98       -0.00966   0.00000   0.00000  -0.00002  -0.00002  -0.00968
   D99        3.12895   0.00000   0.00002  -0.00008  -0.00006   3.12888
   D100      -3.14099   0.00000  -0.00001   0.00003   0.00002  -3.14098
   D101      -0.00239   0.00000   0.00001  -0.00003  -0.00003  -0.00241
         Item               Value     Threshold  Converged?
 Maximum Force            0.000093     0.000450     YES
 RMS     Force            0.000017     0.000300     YES
 Maximum Displacement     0.003858     0.001800     NO 
 RMS     Displacement     0.001073     0.001200     YES
 Predicted change in Energy=-2.598820D-07
 GradGradGradGradGradGradGradGradGradGradGradGradGradGradGradGradGradGrad

                          Input orientation:                          
 ---------------------------------------------------------------------
 Center     Atomic      Atomic             Coordinates (Angstroms)
 Number     Number       Type             X           Y           Z
 ---------------------------------------------------------------------
      1          6           0       -0.000621   -0.012575   -0.000804
      2          6           0       -0.001225   -0.014563    1.381658
      3          6           0        1.212680   -0.003351    2.092820
      4          6           0        2.423843    0.010429    1.390729
      5          6           0        2.405532    0.011259   -0.003118
      6          6           0        1.206816    0.000587   -0.734506
      7          8           0        1.097303   -0.001916    3.448708
      8          6           0        1.267944    0.004466   -2.190365
      9          6           0        0.244144    0.009021   -3.069614
     10          6           0        0.518593    0.004717   -4.525841
     11          6           0       -0.626888    0.066339   -5.488095
     12          6           0       -0.332726   -0.072857   -6.854579
     13          6           0       -1.332100   -0.024000   -7.815903
     14          6           0       -2.663976    0.174054   -7.425874
     15          6           0       -2.978872    0.322518   -6.070391
     16          6           0       -1.968251    0.266641   -5.118081
     17          8           0       -3.690316    0.232400   -8.319380
     18          6           0        2.289537   -0.019620    4.238736
     19          6           0        1.908036   -0.071853    5.697519
     20          6           0        0.902609   -0.939578    6.142086
     21          6           0        0.584748   -1.013544    7.496996
     22          6           0        1.273678   -0.228668    8.424935
     23          6           0        2.276973    0.636314    7.989055
     24          6           0        2.587500    0.717308    6.630348
     25          8           0        1.673159   -0.056264   -4.952975
     26          1           0       -0.951470   -0.022064   -0.524130
     27          1           0       -0.927945   -0.023828    1.945701
     28          1           0        3.373794    0.022386    1.910877
     29          1           0        3.349390    0.021764   -0.541498
     30          1           0        2.265219    0.004298   -2.628224
     31          1           0       -0.784068    0.003678   -2.726564
     32          1           0        0.704124   -0.220145   -7.136226
     33          1           0       -1.086347   -0.138024   -8.869875
     34          1           0       -4.013656    0.481865   -5.786906
     35          1           0       -2.241335    0.395854   -4.076797
     36          1           0       -3.340457    0.118476   -9.213240
     37          1           0        2.893887    0.873448    4.032189
     38          1           0        2.890171   -0.899580    3.963918
     39          1           0        0.363227   -1.543383    5.419284
     40          1           0       -0.200830   -1.685473    7.830321
     41          1           0        1.026008   -0.288824    9.480633
     42          1           0        2.812307    1.255560    8.702803
     43          1           0        3.362274    1.401711    6.293549
 ---------------------------------------------------------------------
                    Distance matrix (angstroms):
                    1          2          3          4          5
     1  C    0.000000
     2  C    1.382464   0.000000
     3  C    2.419803   1.406927   0.000000
     4  C    2.795518   2.425215   1.400013   0.000000
     5  C    2.406272   2.776824   2.411652   1.393968   0.000000
     6  C    1.412939   2.436749   2.827335   2.449056   1.404266
     7  O    3.620039   2.340859   1.360789   2.448497   3.691441
     8  C    2.530559   3.790845   4.283548   3.763027   2.465401
     9  C    3.078632   4.458093   5.252518   4.964449   3.751666
    10  C    4.554761   5.930357   6.654960   6.215771   4.900572
    11  C    5.523477   6.898660   7.801226   7.525178   6.267661
    12  C    6.862082   8.243112   9.080146   8.694292   7.378865
    13  C    7.927720   9.293355  10.230304   9.943358   8.660874
    14  C    7.890498   9.203175  10.279371  10.180627   8.990201
    15  C    6.769207   8.032002   9.182228   9.217106   8.117912
    16  C    5.489632   6.796681   7.885956   7.856255   6.734838
    17  O    9.103437  10.381740  11.511249  11.476865  10.313509
    18  C    4.818565   3.662036   2.401009   2.851331   4.243552
    19  C    6.009773   4.719662   3.671794   4.338349   5.722908
    20  C    6.277759   4.932975   4.167640   5.078589   6.397375
    21  C    7.586936   6.224041   5.533526   6.458893   7.785704
    22  C    8.524295   7.160933   6.336417   7.131627   8.507099
    23  C    8.333447   7.019368   6.025569   6.629571   8.017609
    24  C    7.155646   5.897956   4.795690   5.289619   6.673417
    25  O    5.227566   6.552318   7.061024   6.388314   5.004199
    26  H    1.085391   2.129566   3.395927   3.880783   3.397355
    27  H    2.156139   1.084914   2.145772   3.397595   3.861501
    28  H    3.878457   3.416460   2.168912   1.083099   2.145002
    29  H    3.393538   3.863479   3.392018   2.142490   1.086660
    30  H    3.469532   4.606113   4.836956   4.022086   2.628862
    31  H    2.836163   4.182184   5.216657   5.219468   4.194134
    32  H    7.173145   8.549511   9.245589   8.701699   7.336864
    33  H    8.936160  10.309542  11.201979  10.845435   9.530733
    34  H    7.058887   8.230088   9.467845   9.653087   8.653302
    35  H    4.669190   5.914497   7.081932   7.197658   6.191619
    36  H    9.800034  11.109457  12.189048  12.069921  10.856069
    37  H    5.042642   4.024369   2.712266   2.818342   4.155185
    38  H    4.986228   3.976366   2.667997   2.768913   4.099010
    39  H    5.643856   4.332729   3.762796   4.784321   5.999198
    40  H    8.010317   6.664610   6.143815   7.157747   8.428214
    41  H    9.540855   8.168465   7.395683   8.215232   9.588257
    42  H    9.234365   7.945334   6.916324   7.427495   8.803795
    43  H    7.275173   6.119283   4.923523   5.182081   6.518951
                    6          7          8          9         10
     6  C    0.000000
     7  O    4.184648   0.000000
     8  C    1.457147   5.641658   0.000000
     9  C    2.525775   6.573928   1.349543   0.000000
    10  C    3.853296   7.995523   2.452749   1.481870   0.000000
    11  C    5.095429   9.101864   3.803845   2.571192   1.497283
    12  C    6.311171  10.402295   4.931837   3.829549   2.480682
    13  C    7.522824  11.523626   6.197396   5.001289   3.774970
    14  C    7.732239  11.508028   6.549756   5.240362   4.309015
    15  C    6.789351  10.360199   5.761181   4.414836   3.836522
    16  C    5.419185   9.102726   4.371867   3.026099   2.569776
    17  O    9.031387  12.706852   7.886769   6.564291   5.670775
    18  C    5.089777   1.430342   6.509806   7.589232   8.941736
    19  C    6.470541   2.391512   7.914181   8.923996  10.317631
    20  C    6.947228   2.858566   8.393714   9.283795  10.716522
    21  C    8.317034   4.204134   9.764634  10.621436  12.066062
    22  C    9.162554   4.984512  10.617861  11.543011  12.974869
    23  C    8.811918   4.734312  10.248803  11.261441  12.653594
    24  C    7.527354   3.586196   8.947310  10.004112  11.368761
    25  O    4.244548   8.421570   2.792830   2.365035   1.232551
    26  H    2.168632   4.470047   2.775399   2.812463   4.263273
    27  H    3.426559   2.522130   4.682923   5.150559   6.631300
    28  H    3.419697   2.747349   4.610327   5.882192   7.041579
    29  H    2.151354   4.581942   2.655462   4.004259   4.887606
    30  H    2.169423   6.188147   1.089163   2.068717   2.579080
    31  H    2.816367   6.455507   2.120911   1.083943   2.221335
    32  H    6.425219  10.594482   4.982960   4.098955   2.626613
    33  H    8.453522  12.511368   7.083702   5.952718   4.633232
    34  H    7.280913  10.566575   6.407676   5.073077   4.728555
    35  H    4.818391   8.242448   4.003355   2.709550   2.823443
    36  H    9.621877  13.417643   8.400662   7.113753   6.072637
    37  H    5.131225   2.081928   6.489915   7.629153   8.923934
    38  H    5.071407   2.070172   6.428384   7.569517   8.861047
    39  H    6.400361   2.607328   7.817999   8.630500  10.066095
    40  H    8.841975   4.870118  10.267782  11.039833  12.491960
    41  H   10.220837   6.039165  11.677189  12.578105  14.018736
    42  H    9.654810   5.668156  11.073003  12.113592  13.484167
    43  H    7.483496   3.897869   8.849594   9.966501  11.273745
                   11         12         13         14         15
    11  C    0.000000
    12  C    1.404702   0.000000
    13  C    2.433963   1.387545   0.000000
    14  C    2.813595   2.412897   1.401870   0.000000
    15  C    2.436499   2.788075   2.424612   1.399476   0.000000
    16  C    1.405805   2.409488   2.787006   2.412159   1.389738
    17  O    4.174727   3.675899   2.424956   1.362032   2.360556
    18  C   10.155007  11.399155  12.586922  12.674302  11.582370
    19  C   11.470086  12.750537  13.896523  13.899180  12.748377
    20  C   11.773374  13.083982  14.165369  14.073032  12.876466
    21  C   13.086130  14.411605  15.464100  15.318506  14.091077
    22  C   14.045340  15.364517  16.449826  16.337547  15.116298
    23  C   13.798219  15.087973  16.225231  16.194033  15.013008
    24  C   12.554390  13.820107  14.986894  15.015009  13.872604
    25  O    2.364656   2.764045   4.150781   4.997901   4.799321
    26  H    4.975350   6.360818   7.301701   7.113733   5.915244
    27  H    7.440435   8.820523   9.769967   9.533067   8.281545
    28  H    8.411431   9.517384  10.805455  11.119919  10.205249
    29  H    6.346778   7.309031   8.650747   9.142122   8.408687
    30  H    4.067799   4.961588   6.312965   6.880641   6.280945
    31  H    2.766710   4.153322   5.118836   5.064247   4.012481
    32  H    2.137757   1.084470   2.155607   3.403437   3.872331
    33  H    3.418962   2.152582   1.088234   2.161352   3.410404
    34  H    3.425222   3.872582   3.400510   2.145367   1.084681
    35  H    2.169511   3.402727   3.870904   3.382918   2.126912
    36  H    4.609000   3.827053   2.450785   1.911908   3.170154
    37  H   10.182488  11.394220  12.611172  12.754065  11.698502
    38  H   10.131300  11.318587  12.544257  12.717256  11.688736
    39  H   11.069889  12.381217  13.429551  13.308329  12.110485
    40  H   13.439887  14.773768  15.774809  15.565231  14.317100
    41  H   15.063897  16.393046  17.458550  17.310696  16.070070
    42  H   14.650047  15.927588  17.078672  17.067323  15.895143
    43  H   12.510146  13.736836  14.938087  15.034806  13.937066
                   16         17         18         19         20
    16  C    0.000000
    17  O    3.635244   0.000000
    18  C   10.284004  13.911450   0.000000
    19  C   11.494232  15.096608   1.508747   0.000000
    20  C   11.682815  15.218492   2.528366   1.400525   0.000000
    21  C   12.934328  16.431260   3.809258   2.424044   1.393660
    22  C   13.934444  17.470716   4.312764   2.804603   2.419604
    23  C   13.782438  17.370571   3.807269   2.426676   2.789912
    24  C   12.608868  16.221606   2.520249   1.398077   2.412992
    25  O    3.659425   6.338996   9.212427  10.653095  11.156808
    26  H    4.713977   8.266314   5.760992   6.847493   6.979819
    27  H    7.145881  10.633355   3.950977   4.703321   4.668959
    28  H    8.831952  12.433983   2.568327   4.061525   4.993522
    29  H    7.020142  10.492725   4.896492   6.404029   7.182006
    30  H    4.918382   8.240733   6.867044   8.333749   8.925578
    31  H    2.681565   6.306995   7.613343   8.844111   9.076760
    32  H    3.384001   4.573374  11.486667  12.890943  13.299269
    33  H    3.875238   2.687175  13.536849  14.872110  15.164346
    34  H    2.162713   2.565192  11.853068  12.933098  12.980408
    35  H    1.084224   4.486176   9.478898  10.628889  10.774662
    36  H    4.321485   0.966626  14.583263  15.808657  15.965874
    37  H   10.379597  14.011564   1.097940   2.153793   3.421099
    38  H   10.365666  13.980830   1.100279   2.157566   2.948969
    39  H   10.942945  14.433832   2.725109   2.151569   1.085337
    40  H   13.213464  16.633328   4.677229   3.405866   2.150366
    41  H   14.912966  18.421614   5.398746   3.890630   3.403616
    42  H   14.657712  18.250635   4.671965   3.407560   3.875932
    43  H   12.646271  16.267883   2.719045   2.154404   3.399196
                   21         22         23         24         25
    21  C    0.000000
    22  C    1.397042   0.000000
    23  C    2.414079   1.394556   0.000000
    24  C    2.785309   2.416928   1.396092   0.000000
    25  O   12.534065  13.384983  12.974606  11.645076   0.000000
    26  H    8.226875   9.223868   9.128561   8.016080   5.148253
    27  H    5.838207   6.846136   6.872366   5.903690   7.372823
    28  H    6.329033   6.848829   6.206784   4.834726   7.071833
    29  H    8.563439   9.206965   8.619633   7.245663   4.719849
    30  H   10.314071  11.099988  10.636080   9.291577   2.399723
    31  H   10.364824  11.342144  11.162199   9.971386   3.316393
    32  H   14.655202  15.571583  15.230940  13.926396   2.394258
    33  H   16.475241  17.455325  17.208575  15.952607   4.792042
    34  H   14.136605  15.180157  15.145064  14.064810   5.772770
    35  H   11.996910  13.001487  12.886339  11.750061   4.036751
    36  H   17.202346  18.235020  18.103664  16.926859   6.581545
    37  H    4.571406   4.809985   4.011684   2.620818   9.115246
    38  H    4.220261   4.792060   4.351633   3.133015   9.038986
    39  H    2.155618   3.404605   3.875207   3.394819  10.559886
    40  H    1.086152   2.156390   3.399323   3.871444  13.022243
    41  H    2.157485   1.086028   2.155365   3.402158  14.449980
    42  H    3.400709   2.155811   1.086040   2.152979  13.765856
    43  H    3.872518   3.400467   2.153707   1.087252  11.465736
                   26         27         28         29         30
    26  H    0.000000
    27  H    2.469944   0.000000
    28  H    4.963783   4.302128   0.000000
    29  H    4.301118   4.948113   2.452497   0.000000
    30  H    3.843824   5.578339   4.672548   2.351629   0.000000
    31  H    2.208936   4.674560   6.228486   4.675502   3.050872
    32  H    6.819094   9.229496   9.435892   7.109599   4.775927
    33  H    8.347640  10.817338  11.668042   9.437328   7.086004
    34  H    6.109642   8.340895  10.679017   9.052096   7.044828
    35  H    3.802611   6.178318   8.217141   6.625292   4.749811
    36  H    9.012638  11.417636  12.993706  10.952740   8.648646
    37  H    6.028992   4.445777   2.335504   4.674554   6.746239
    38  H    5.972505   4.406603   2.301932   4.621529   6.683105
    39  H    6.274314   4.005241   4.880991   6.848195   8.412804
    40  H    8.551447   6.157801   7.122818   9.252354  10.877402
    41  H   10.201807   7.788669   7.931592  10.292602  12.175630
    42  H   10.046623   7.828457   6.925766   9.341723  11.413024
    43  H    8.192452   6.272314   4.594614   6.972968   9.096940
                   31         32         33         34         35
    31  H    0.000000
    32  H    4.659392   0.000000
    33  H    6.152375   2.493605   0.000000
    34  H    4.474884   4.956907   4.296289   0.000000
    35  H    2.024983   4.291304   4.959094   2.464344   0.000000
    36  H    6.973182   4.559307   2.294494   3.510700   5.260043
    37  H    7.743681  11.433482  13.539888  12.011748   9.610112
    38  H    7.686251  11.333739  13.457299  12.027043   9.626193
    39  H    8.370455  12.629648  14.431090  12.199894  10.035933
    40  H   10.707064  15.065313  16.795097  14.306078  12.258672
    41  H   12.344132  16.620118  18.472301  16.096270  13.962386
    42  H   12.047055  16.046712  18.053824  16.035711  13.769407
    43  H   10.025422  13.786045  15.877356  14.184070  11.830311
                   36         37         38         39         40
    36  H    0.000000
    37  H   14.658731   0.000000
    38  H   14.611456   1.774346   0.000000
    39  H   15.185184   3.764220   2.986305   0.000000
    40  H   17.423962   5.527310   5.012084   2.480211   0.000000
    41  H   19.201375   5.875831   5.855106   4.302064   2.485817
    42  H   18.977198   4.686929   5.206507   4.961207   4.299987
    43  H   16.942072   2.369008   3.308474   4.293275   4.958638
                   41         42         43
    41  H    0.000000
    42  H    2.486163   0.000000
    43  H    4.298087   2.475546   0.000000
 Stoichiometry    C22H18O3
 Framework group  C1[X(C22H18O3)]
 Deg. of freedom   123
 Full point group                 C1      NOp   1
 Largest Abelian subgroup         C1      NOp   1
 Largest concise Abelian subgroup C1      NOp   1
                         Standard orientation:                         
 ---------------------------------------------------------------------
 Center     Atomic      Atomic             Coordinates (Angstroms)
 Number     Number       Type             X           Y           Z
 ---------------------------------------------------------------------
      1          6           0        0.223144   -0.466473    0.015889
      2          6           0        1.564472   -0.799224    0.052270
      3          6           0        2.547311    0.207058    0.022845
      4          6           0        2.158131    1.550275   -0.043070
      5          6           0        0.801209    1.867364   -0.079983
      6          6           0       -0.197600    0.880691   -0.051334
      7          8           0        3.835105   -0.230357    0.067612
      8          6           0       -1.595568    1.289834   -0.090873
      9          6           0       -2.695867    0.509036   -0.059817
     10          6           0       -4.042590    1.124562   -0.118137
     11          6           0       -5.253647    0.248906   -0.026361
     12          6           0       -6.506519    0.854572   -0.217846
     13          6           0       -7.681224    0.119594   -0.146051
     14          6           0       -7.627142   -1.254024    0.128702
     15          6           0       -6.390087   -1.876634    0.330165
     16          6           0       -5.221309   -1.128977    0.250552
     17          8           0       -8.742691   -2.030905    0.213192
     18          6           0        4.889673    0.734390    0.012583
     19          6           0        6.213887    0.011393    0.019850
     20          6           0        6.415589   -1.117477   -0.784163
     21          6           0        7.654694   -1.755040   -0.804637
     22          6           0        8.709634   -1.267123   -0.029546
     23          6           0        8.515888   -0.142556    0.772076
     24          6           0        7.271223    0.489196    0.799826
     25          8           0       -4.177513    2.342777   -0.248254
     26          1           0       -0.513977   -1.262829    0.039167
     27          1           0        1.888276   -1.833360    0.104726
     28          1           0        2.891915    2.346660   -0.063927
     29          1           0        0.506424    2.912015   -0.131341
     30          1           0       -1.779765    2.361524   -0.152754
     31          1           0       -2.611049   -0.570168   -0.004528
     32          1           0       -6.527391    1.919016   -0.424244
     33          1           0       -8.642914    0.604663   -0.301332
     34          1           0       -6.367113   -2.938855    0.548552
     35          1           0       -4.278754   -1.636652    0.422005
     36          1           0       -9.523897   -1.483391    0.057275
     37          1           0        4.821760    1.418770    0.868435
     38          1           0        4.781101    1.334184   -0.903427
     39          1           0        5.593085   -1.499783   -1.380222
     40          1           0        7.798585   -2.633365   -1.427184
     41          1           0        9.675138   -1.764032   -0.048019
     42          1           0        9.328399    0.238849    1.383500
     43          1           0        7.121167    1.358571    1.435268
 ---------------------------------------------------------------------
 Rotational constants (GHZ):      0.9070708      0.0487978      0.0466978
 Standard basis: 6-31G(d,p) (6D, 7F)
 There are   465 symmetry adapted basis functions of A   symmetry.
 Integral buffers will be    262144 words long.
 Raffenetti 2 integral format.
 Two-electron integral symmetry is turned on.
   465 basis functions,   826 primitive gaussians,   465 cartesian basis functions
    87 alpha electrons       87 beta electrons
       nuclear repulsion energy      1771.9756969992 Hartrees.
 NAtoms=   43 NActive=   43 NUniq=   43 SFac= 7.50D-01 NAtFMM=   80 NAOKFM=F Big=F
 One-electron integrals computed using PRISM.
 NBasis=   465 RedAO= T  NBF=   465
 NBsUse=   465 1.00D-06 NBFU=   465
 Initial guess read from the read-write file.
 B after Tr=     0.000000    0.000000    0.000000
         Rot=    1.000000    0.000000    0.000000    0.000000 Ang=   0.00 deg.
 Initial guess orbital symmetries:
       Occupied  (A) (A) (A) (A) (A) (A) (A) (A) (A) (A) (A) (A)
                 (A) (A) (A) (A) (A) (A) (A) (A) (A) (A) (A) (A)
                 (A) (A) (A) (A) (A) (A) (A) (A) (A) (A) (A) (A)
                 (A) (A) (A) (A) (A) (A) (A) (A) (A) (A) (A) (A)
                 (A) (A) (A) (A) (A) (A) (A) (A) (A) (A) (A) (A)
                 (A) (A) (A) (A) (A) (A) (A) (A) (A) (A) (A) (A)
                 (A) (A) (A) (A) (A) (A) (A) (A) (A) (A) (A) (A)
                 (A) (A) (A)
       Virtual   (A) (A) (A) (A) (A) (A) (A) (A) (A) (A) (A) (A)
                 (A) (A) (A) (A) (A) (A) (A) (A) (A) (A) (A) (A)
                 (A) (A) (A) (A) (A) (A) (A) (A) (A) (A) (A) (A)
                 (A) (A) (A) (A) (A) (A) (A) (A) (A) (A) (A) (A)
                 (A) (A) (A) (A) (A) (A) (A) (A) (A) (A) (A) (A)
                 (A) (A) (A) (A) (A) (A) (A) (A) (A) (A) (A) (A)
                 (A) (A) (A) (A) (A) (A) (A) (A) (A) (A) (A) (A)
                 (A) (A) (A) (A) (A) (A) (A) (A) (A) (A) (A) (A)
                 (A) (A) (A) (A) (A) (A) (A) (A) (A) (A) (A) (A)
                 (A) (A) (A) (A) (A) (A) (A) (A) (A) (A) (A) (A)
                 (A) (A) (A) (A) (A) (A) (A) (A) (A) (A) (A) (A)
                 (A) (A) (A) (A) (A) (A) (A) (A) (A) (A) (A) (A)
                 (A) (A) (A) (A) (A) (A) (A) (A) (A) (A) (A) (A)
                 (A) (A) (A) (A) (A) (A) (A) (A) (A) (A) (A) (A)
                 (A) (A) (A) (A) (A) (A) (A) (A) (A) (A) (A) (A)
                 (A) (A) (A) (A) (A) (A) (A) (A) (A) (A) (A) (A)
                 (A) (A) (A) (A) (A) (A) (A) (A) (A) (A) (A) (A)
                 (A) (A) (A) (A) (A) (A) (A) (A) (A) (A) (A) (A)
                 (A) (A) (A) (A) (A) (A) (A) (A) (A) (A) (A) (A)
                 (A) (A) (A) (A) (A) (A) (A) (A) (A) (A) (A) (A)
                 (A) (A) (A) (A) (A) (A) (A) (A) (A) (A) (A) (A)
                 (A) (A) (A) (A) (A) (A) (A) (A) (A) (A) (A) (A)
                 (A) (A) (A) (A) (A) (A) (A) (A) (A) (A) (A) (A)
                 (A) (A) (A) (A) (A) (A) (A) (A) (A) (A) (A) (A)
                 (A) (A) (A) (A) (A) (A) (A) (A) (A) (A) (A) (A)
                 (A) (A) (A) (A) (A) (A) (A) (A) (A) (A) (A) (A)
                 (A) (A) (A) (A) (A) (A) (A) (A) (A) (A) (A) (A)
                 (A) (A) (A) (A) (A) (A) (A) (A) (A) (A) (A) (A)
                 (A) (A) (A) (A) (A) (A) (A) (A) (A) (A) (A) (A)
                 (A) (A) (A) (A) (A) (A) (A) (A) (A) (A) (A) (A)
                 (A) (A) (A) (A) (A) (A) (A) (A) (A) (A) (A) (A)
                 (A) (A) (A) (A) (A) (A)
 Requested convergence on RMS density matrix=1.00D-08 within 128 cycles.
 Requested convergence on MAX density matrix=1.00D-06.
 Requested convergence on             energy=1.00D-06.
 No special actions if energy rises.
 SCF Done:  E(RB3LYP) =  -1074.86483120     A.U. after    7 cycles
             Convg  =    0.4494D-08             -V/T =  2.0095
 Calling FoFJK, ICntrl=      2127 FMM=F ISym2X=0 I1Cent= 0 IOpClX= 0 NMat=1 NMatS=1 NMatT=0.
 ***** Axes restored to original set *****
 -------------------------------------------------------------------
 Center     Atomic                   Forces (Hartrees/Bohr)
 Number     Number              X              Y              Z
 -------------------------------------------------------------------
      1        6          -0.000002602    0.000003874   -0.000005477
      2        6           0.000001115   -0.000005044    0.000009649
      3        6          -0.000010709   -0.000020767   -0.000007592
      4        6           0.000003774    0.000002606    0.000008535
      5        6           0.000004437    0.000001490    0.000001374
      6        6          -0.000002167    0.000001754    0.000000218
      7        8           0.000045345    0.000030998    0.000013701
      8        6          -0.000001721    0.000010555   -0.000002389
      9        6           0.000005927    0.000002953    0.000016642
     10        6          -0.000012255   -0.000001405    0.000004104
     11        6           0.000008100    0.000006615   -0.000022125
     12        6           0.000013640    0.000006080    0.000015471
     13        6          -0.000008218    0.000000285   -0.000014007
     14        6           0.000015376   -0.000001918    0.000011877
     15        6          -0.000008411   -0.000003113   -0.000000842
     16        6          -0.000007526   -0.000004631    0.000008603
     17        8           0.000008129   -0.000011447   -0.000024844
     18        6          -0.000030352    0.000003026   -0.000029118
     19        6          -0.000049250   -0.000047999   -0.000003411
     20        6           0.000004801   -0.000006275   -0.000008375
     21        6           0.000016589    0.000007847    0.000015352
     22        6          -0.000019079   -0.000019550    0.000007328
     23        6           0.000011802    0.000003952   -0.000013028
     24        6           0.000017080    0.000011721    0.000004458
     25        8           0.000009890    0.000002375   -0.000011076
     26        1           0.000001440   -0.000000829    0.000000903
     27        1           0.000001885   -0.000005107   -0.000002995
     28        1          -0.000002692    0.000012383   -0.000000358
     29        1          -0.000002550    0.000008661    0.000000626
     30        1          -0.000001684    0.000014634    0.000000499
     31        1          -0.000015599   -0.000008548   -0.000012988
     32        1          -0.000002783    0.000006383   -0.000003074
     33        1           0.000000096    0.000004722    0.000004785
     34        1           0.000002292   -0.000009236   -0.000002243
     35        1           0.000012997   -0.000005924    0.000010669
     36        1          -0.000009925    0.000002034    0.000018258
     37        1          -0.000002311    0.000004528    0.000008434
     38        1           0.000009020    0.000007416    0.000004502
     39        1           0.000006736    0.000004985    0.000000731
     40        1           0.000003819   -0.000008684   -0.000003693
     41        1           0.000001485   -0.000007091   -0.000003727
     42        1          -0.000006488   -0.000000843    0.000000399
     43        1          -0.000009454    0.000006537    0.000004245
 -------------------------------------------------------------------
 Cartesian Forces:  Max     0.000049250 RMS     0.000012175

 GradGradGradGradGradGradGradGradGradGradGradGradGradGradGradGradGradGrad
 Berny optimization.
 Using GEDIIS/GDIIS optimizer.
 Internal  Forces:  Max     0.000045321 RMS     0.000009043
 Search for a local minimum.
 Step number   5 out of a maximum of  227
 All quantities printed in internal units (Hartrees-Bohrs-Radians)
 Mixed Optimization -- En-DIIS/RFO-DIIS
 Swaping is turned off.
 Update second derivatives using D2CorX and points    1    2    3    4    5
 DE= -3.57D-07 DEPred=-2.60D-07 R= 1.37D+00
 Trust test= 1.37D+00 RLast= 3.98D-03 DXMaxT set to 7.50D-02
     Eigenvalues ---    0.00036   0.00767   0.00935   0.01139   0.01310
     Eigenvalues ---    0.01532   0.01650   0.01777   0.01904   0.01971
     Eigenvalues ---    0.02031   0.02039   0.02058   0.02067   0.02089
     Eigenvalues ---    0.02089   0.02098   0.02104   0.02118   0.02122
     Eigenvalues ---    0.02125   0.02127   0.02129   0.02139   0.02143
     Eigenvalues ---    0.02144   0.02147   0.02149   0.02151   0.02152
     Eigenvalues ---    0.02158   0.02173   0.02185   0.02192   0.02203
     Eigenvalues ---    0.02218   0.02760   0.05125   0.06386   0.07310
     Eigenvalues ---    0.11327   0.13886   0.15956   0.15993   0.15999
     Eigenvalues ---    0.15999   0.15999   0.16000   0.16000   0.16000
     Eigenvalues ---    0.16000   0.16000   0.16000   0.16000   0.16000
     Eigenvalues ---    0.16001   0.16034   0.16201   0.21861   0.21989
     Eigenvalues ---    0.22000   0.22000   0.22003   0.22033   0.22183
     Eigenvalues ---    0.22956   0.22981   0.23442   0.23781   0.24013
     Eigenvalues ---    0.24142   0.24979   0.25000   0.25000   0.25000
     Eigenvalues ---    0.25006   0.25099   0.31046   0.31568   0.33671
     Eigenvalues ---    0.33902   0.34344   0.34399   0.34926   0.35032
     Eigenvalues ---    0.35135   0.35205   0.35264   0.35274   0.35281
     Eigenvalues ---    0.35350   0.35400   0.35430   0.35458   0.35498
     Eigenvalues ---    0.35526   0.35641   0.37247   0.38004   0.40257
     Eigenvalues ---    0.40981   0.41624   0.41874   0.41971   0.42020
     Eigenvalues ---    0.42583   0.44625   0.44745   0.45200   0.45377
     Eigenvalues ---    0.45699   0.45940   0.46045   0.46253   0.46357
     Eigenvalues ---    0.46536   0.47579   0.48018   0.52543   0.52824
     Eigenvalues ---    0.54369   0.55223   0.901651000.000001000.00000
     Eigenvalues --- 1000.000001000.000001000.000001000.000001000.00000
     Eigenvalues --- 1000.000001000.000001000.000001000.000001000.00000
     Eigenvalues --- 1000.000001000.000001000.000001000.000001000.00000
     Eigenvalues --- 1000.000001000.000001000.000001000.000001000.00000
     Eigenvalues --- 1000.000001000.000001000.000001000.000001000.00000
     Eigenvalues --- 1000.000001000.000001000.000001000.000001000.00000
     Eigenvalues --- 1000.000001000.000001000.000001000.000001000.00000
     Eigenvalues --- 1000.000001000.000001000.000001000.000001000.00000
     Eigenvalues --- 1000.000001000.000001000.000001000.000001000.00000
     Eigenvalues --- 1000.000001000.000001000.000001000.000001000.00000
     Eigenvalues --- 1000.000001000.000001000.000001000.000001000.00000
     Eigenvalues --- 1000.000001000.000001000.000001000.000001000.00000
     Eigenvalues --- 1000.000001000.000001000.000001000.000001000.00000
     Eigenvalues --- 1000.000001000.000001000.000001000.000001000.00000
     Eigenvalues --- 1000.000001000.000001000.000001000.000001000.00000
     Eigenvalues --- 1000.000001000.000001000.000001000.000001000.00000
     Eigenvalues --- 1000.000001000.000001000.000001000.000001000.00000
     Eigenvalues --- 1000.000001000.000001000.000001000.000001000.00000
     Eigenvalues --- 1000.000001000.00000
 En-DIIS/RFO-DIIS IScMMF=        0 using points:     5    4    3    2    1
 RFO step:  Lambda=-4.49996235D-08.
 DIIS coeffs:      1.88661     -0.42722     -0.38575     -1.64859      1.57495
 Iteration  1 RMS(Cart)=  0.00341973 RMS(Int)=  0.00000437
 Iteration  2 RMS(Cart)=  0.00000750 RMS(Int)=  0.00000006
 Iteration  3 RMS(Cart)=  0.00000000 RMS(Int)=  0.00000006
 Variable       Old X    -DE/DX   Delta X   Delta X   Delta X     New X
                                  (DIIS)     (GDIIS)  (Total)
    R1        2.61248   0.00000   0.00001   0.00001   0.00001   2.61249
    R2        2.67007   0.00000   0.00000  -0.00001  -0.00001   2.67006
    R3        2.05109   0.00000  -0.00002   0.00001  -0.00001   2.05108
    R4        2.65871   0.00000  -0.00001  -0.00002  -0.00003   2.65868
    R5        2.05019   0.00000  -0.00002   0.00001  -0.00001   2.05018
    R6        2.64564   0.00000  -0.00001   0.00000  -0.00001   2.64563
    R7        2.57152   0.00000   0.00000   0.00000   0.00000   2.57152
    R8        2.63422   0.00000   0.00000   0.00000   0.00000   2.63422
    R9        2.04676   0.00000  -0.00002   0.00001  -0.00001   2.04675
   R10        2.65368   0.00000   0.00001   0.00000   0.00001   2.65369
   R11        2.05349   0.00000  -0.00002   0.00001  -0.00001   2.05348
   R12        2.75361   0.00000   0.00001  -0.00001   0.00000   2.75361
   R13        2.70295  -0.00004  -0.00019  -0.00012  -0.00030   2.70265
   R14        2.55027   0.00000  -0.00001  -0.00002  -0.00003   2.55024
   R15        2.05822   0.00000  -0.00001   0.00001   0.00000   2.05822
   R16        2.80033   0.00000   0.00004   0.00000   0.00003   2.80036
   R17        2.04836   0.00001   0.00000   0.00002   0.00002   2.04837
   R18        2.82945  -0.00002  -0.00002   0.00000  -0.00002   2.82943
   R19        2.32918   0.00001   0.00001   0.00000   0.00001   2.32920
   R20        2.65450  -0.00001  -0.00003  -0.00001  -0.00004   2.65446
   R21        2.65659  -0.00001   0.00002   0.00000   0.00002   2.65661
   R22        2.62208   0.00001   0.00002   0.00001   0.00003   2.62211
   R23        2.04935   0.00000  -0.00001   0.00000  -0.00001   2.04934
   R24        2.64915   0.00000   0.00000  -0.00001  -0.00001   2.64914
   R25        2.05646  -0.00001  -0.00003   0.00001  -0.00002   2.05644
   R26        2.64463   0.00000  -0.00002   0.00002  -0.00001   2.64462
   R27        2.57387   0.00001   0.00001   0.00000   0.00002   2.57388
   R28        2.62622   0.00000   0.00001  -0.00002   0.00000   2.62622
   R29        2.04975   0.00000  -0.00002   0.00001  -0.00002   2.04973
   R30        2.04889   0.00001  -0.00002   0.00001   0.00000   2.04888
   R31        1.82666  -0.00002  -0.00009   0.00002  -0.00007   1.82659
   R32        2.85112   0.00001   0.00006   0.00000   0.00007   2.85119
   R33        2.07481   0.00000   0.00000   0.00002   0.00002   2.07483
   R34        2.07923   0.00000  -0.00001   0.00003   0.00002   2.07925
   R35        2.64661  -0.00001  -0.00004  -0.00006  -0.00010   2.64650
   R36        2.64198   0.00002   0.00004   0.00006   0.00010   2.64208
   R37        2.63364   0.00001   0.00005   0.00002   0.00007   2.63370
   R38        2.05099  -0.00001  -0.00009   0.00003  -0.00006   2.05093
   R39        2.64003  -0.00001  -0.00005  -0.00003  -0.00007   2.63995
   R40        2.05253   0.00000  -0.00001   0.00001   0.00000   2.05253
   R41        2.63533   0.00001   0.00005   0.00002   0.00007   2.63540
   R42        2.05230   0.00000  -0.00002   0.00000  -0.00002   2.05228
   R43        2.63823  -0.00001  -0.00005  -0.00001  -0.00006   2.63817
   R44        2.05232   0.00000  -0.00001   0.00001   0.00000   2.05232
   R45        2.05461   0.00000   0.00000   0.00000   0.00000   2.05461
    A1        2.11725   0.00000  -0.00001   0.00000  -0.00001   2.11724
    A2        2.07346   0.00000  -0.00001   0.00001   0.00000   2.07346
    A3        2.09248   0.00000   0.00002  -0.00001   0.00001   2.09249
    A4        2.10027   0.00000   0.00000  -0.00001  -0.00001   2.10026
    A5        2.11798   0.00000  -0.00002   0.00000  -0.00002   2.11796
    A6        2.06494   0.00000   0.00002   0.00001   0.00003   2.06496
    A7        2.08634   0.00001   0.00003   0.00001   0.00004   2.08638
    A8        2.01585   0.00000   0.00001   0.00000   0.00002   2.01587
    A9        2.18098  -0.00001  -0.00004  -0.00002  -0.00006   2.18093
   A10        2.08299   0.00000  -0.00003   0.00000  -0.00003   2.08296
   A11        2.11534   0.00000   0.00002   0.00000   0.00001   2.11536
   A12        2.08485   0.00000   0.00001   0.00001   0.00001   2.08487
   A13        2.13175   0.00000   0.00001  -0.00001   0.00000   2.13175
   A14        2.07601   0.00000   0.00000   0.00001   0.00001   2.07602
   A15        2.07542   0.00000  -0.00002   0.00000  -0.00001   2.07541
   A16        2.04776   0.00000   0.00000   0.00001   0.00001   2.04778
   A17        2.15879   0.00000   0.00002  -0.00003  -0.00001   2.15878
   A18        2.07664   0.00000  -0.00002   0.00002  -0.00001   2.07663
   A19        2.07106   0.00000   0.00006   0.00003   0.00009   2.07115
   A20        2.23842   0.00000   0.00005  -0.00003   0.00002   2.23845
   A21        2.02647   0.00000  -0.00003   0.00002  -0.00001   2.02647
   A22        2.01829   0.00000  -0.00003   0.00001  -0.00002   2.01827
   A23        2.09408   0.00001   0.00004  -0.00002   0.00003   2.09411
   A24        2.10995   0.00001   0.00012   0.00002   0.00014   2.11010
   A25        2.07908  -0.00002  -0.00017   0.00000  -0.00017   2.07890
   A26        2.08258  -0.00004  -0.00006  -0.00002  -0.00008   2.08251
   A27        2.11084   0.00003   0.00008  -0.00002   0.00006   2.11091
   A28        2.08973   0.00001  -0.00002   0.00004   0.00002   2.08975
   A29        2.04980   0.00003   0.00009   0.00002   0.00011   2.04991
   A30        2.17327  -0.00005  -0.00015  -0.00003  -0.00017   2.17310
   A31        2.06006   0.00002   0.00005   0.00001   0.00007   2.06013
   A32        2.11724  -0.00001  -0.00005   0.00000  -0.00005   2.11719
   A33        2.05592   0.00001   0.00007   0.00001   0.00007   2.05600
   A34        2.11002   0.00000  -0.00002   0.00000  -0.00002   2.11000
   A35        2.09036   0.00000   0.00000  -0.00001  -0.00001   2.09035
   A36        2.09980   0.00000   0.00001   0.00001   0.00001   2.09981
   A37        2.09303   0.00000   0.00000   0.00000   0.00000   2.09302
   A38        2.09236   0.00001   0.00006   0.00001   0.00007   2.09243
   A39        2.14058   0.00000  -0.00003   0.00000  -0.00003   2.14054
   A40        2.05024   0.00000  -0.00002  -0.00001  -0.00003   2.05021
   A41        2.08956  -0.00001  -0.00005   0.00000  -0.00005   2.08951
   A42        2.07531   0.00000   0.00000   0.00000   0.00000   2.07531
   A43        2.11831   0.00000   0.00005   0.00001   0.00005   2.11836
   A44        2.11675   0.00000  -0.00001  -0.00001  -0.00001   2.11674
   A45        2.10608  -0.00001  -0.00011  -0.00002  -0.00013   2.10595
   A46        2.06026   0.00002   0.00012   0.00002   0.00014   2.06040
   A47        1.90588   0.00001   0.00010  -0.00005   0.00006   1.90593
   A48        1.90044   0.00002   0.00028  -0.00001   0.00027   1.90071
   A49        1.92286   0.00000   0.00003   0.00006   0.00009   1.92295
   A50        1.90388   0.00000   0.00009   0.00003   0.00012   1.90400
   A51        1.92755  -0.00001  -0.00005  -0.00003  -0.00009   1.92747
   A52        1.93034  -0.00001  -0.00023  -0.00005  -0.00028   1.93006
   A53        1.87870   0.00000  -0.00012   0.00000  -0.00012   1.87858
   A54        2.10586   0.00004   0.00040   0.00007   0.00046   2.10632
   A55        2.09751  -0.00004  -0.00044  -0.00007  -0.00051   2.09700
   A56        2.07925   0.00000   0.00003   0.00000   0.00003   2.07928
   A57        2.10043  -0.00001  -0.00007  -0.00001  -0.00008   2.10036
   A58        2.08296   0.00000  -0.00004   0.00000  -0.00004   2.08292
   A59        2.09969   0.00001   0.00011   0.00001   0.00011   2.09980
   A60        2.09839   0.00001   0.00008   0.00002   0.00010   2.09849
   A61        2.08995  -0.00001  -0.00007  -0.00003  -0.00009   2.08986
   A62        2.09484   0.00000  -0.00002   0.00001  -0.00001   2.09483
   A63        2.08937   0.00000  -0.00006   0.00000  -0.00006   2.08931
   A64        2.09681   0.00000   0.00004   0.00000   0.00004   2.09685
   A65        2.09700   0.00000   0.00002   0.00000   0.00002   2.09702
   A66        2.09462   0.00000   0.00002  -0.00002   0.00001   2.09463
   A67        2.09772   0.00000   0.00000  -0.00001   0.00000   2.09772
   A68        2.09080   0.00000  -0.00003   0.00002  -0.00001   2.09079
   A69        2.10425   0.00000   0.00000   0.00000   0.00000   2.10425
   A70        2.08858   0.00000   0.00006   0.00000   0.00006   2.08864
   A71        2.09035   0.00000  -0.00005   0.00000  -0.00006   2.09030
    D1        0.00005   0.00000  -0.00008   0.00003  -0.00005   0.00000
    D2        3.14069   0.00000   0.00006  -0.00006   0.00000   3.14069
    D3        3.14090   0.00000  -0.00017   0.00015  -0.00003   3.14087
    D4       -0.00164   0.00000  -0.00003   0.00005   0.00003  -0.00162
    D5        0.00024   0.00000   0.00000  -0.00011  -0.00010   0.00014
    D6       -3.14062   0.00000  -0.00004  -0.00009  -0.00013  -3.14075
    D7       -3.14060   0.00000   0.00009  -0.00022  -0.00013  -3.14073
    D8        0.00172   0.00000   0.00005  -0.00020  -0.00015   0.00157
    D9        0.00047   0.00000   0.00013   0.00003   0.00017   0.00063
   D10        3.13789   0.00000   0.00018  -0.00008   0.00010   3.13800
   D11       -3.14020   0.00000  -0.00001   0.00012   0.00012  -3.14009
   D12       -0.00277   0.00000   0.00004   0.00001   0.00005  -0.00272
   D13       -0.00127   0.00000  -0.00010  -0.00003  -0.00012  -0.00139
   D14        3.13823   0.00000  -0.00018  -0.00013  -0.00031   3.13792
   D15       -3.13827   0.00000  -0.00015   0.00009  -0.00005  -3.13833
   D16        0.00122   0.00000  -0.00024  -0.00001  -0.00024   0.00098
   D17        3.11858  -0.00001  -0.00007  -0.00063  -0.00069   3.11789
   D18       -0.02743  -0.00001  -0.00002  -0.00074  -0.00076  -0.02819
   D19        0.00161   0.00000   0.00002  -0.00005  -0.00003   0.00157
   D20       -3.14135   0.00000   0.00007  -0.00004   0.00003  -3.14132
   D21       -3.13793   0.00000   0.00010   0.00005   0.00015  -3.13778
   D22        0.00230   0.00000   0.00015   0.00006   0.00021   0.00251
   D23       -0.00108   0.00000   0.00003   0.00011   0.00015  -0.00093
   D24        3.13982   0.00000   0.00007   0.00010   0.00017   3.13999
   D25       -3.14130   0.00000  -0.00002   0.00010   0.00008  -3.14122
   D26       -0.00041   0.00000   0.00002   0.00009   0.00011  -0.00030
   D27        0.01162  -0.00001  -0.00010  -0.00066  -0.00076   0.01086
   D28       -3.13070  -0.00001  -0.00009  -0.00059  -0.00068  -3.13137
   D29       -3.12923  -0.00001  -0.00014  -0.00064  -0.00079  -3.13002
   D30        0.01164  -0.00001  -0.00013  -0.00057  -0.00070   0.01094
   D31       -3.10126   0.00001   0.00072   0.00067   0.00139  -3.09987
   D32        1.06555   0.00001   0.00059   0.00068   0.00126   1.06681
   D33       -0.99311   0.00001   0.00067   0.00062   0.00128  -0.99183
   D34       -3.13556   0.00000   0.00024  -0.00022   0.00002  -3.13555
   D35       -0.00703   0.00000  -0.00004  -0.00004  -0.00007  -0.00711
   D36        0.00675   0.00000   0.00023  -0.00030  -0.00007   0.00668
   D37        3.13528   0.00000  -0.00005  -0.00011  -0.00016   3.13512
   D38       -3.09831   0.00001   0.00069   0.00044   0.00113  -3.09718
   D39        0.05040   0.00000   0.00040   0.00041   0.00081   0.05121
   D40        0.05611   0.00001   0.00095   0.00026   0.00122   0.05733
   D41       -3.07836   0.00000   0.00067   0.00023   0.00090  -3.07746
   D42       -3.03452  -0.00001  -0.00050  -0.00006  -0.00056  -3.03509
   D43        0.11878  -0.00001  -0.00031  -0.00026  -0.00057   0.11821
   D44        0.10004   0.00000  -0.00022  -0.00003  -0.00025   0.09979
   D45       -3.02984   0.00000  -0.00003  -0.00023  -0.00026  -3.03010
   D46       -3.13791   0.00000   0.00006  -0.00003   0.00003  -3.13788
   D47        0.00349   0.00000   0.00007  -0.00005   0.00003   0.00352
   D48       -0.00725   0.00000  -0.00012   0.00015   0.00003  -0.00722
   D49        3.13415   0.00000  -0.00010   0.00013   0.00003   3.13418
   D50        3.13297   0.00000  -0.00006   0.00006   0.00001   3.13298
   D51        0.00608   0.00000  -0.00002   0.00005   0.00003   0.00611
   D52        0.00315   0.00000   0.00013  -0.00013   0.00000   0.00316
   D53       -3.12373   0.00000   0.00016  -0.00014   0.00002  -3.12371
   D54        0.00527   0.00000   0.00004  -0.00008  -0.00004   0.00523
   D55       -3.13699   0.00000   0.00005  -0.00009  -0.00003  -3.13703
   D56       -3.13612   0.00000   0.00002  -0.00006  -0.00004  -3.13616
   D57        0.00480   0.00000   0.00003  -0.00007  -0.00003   0.00477
   D58        0.00093   0.00000   0.00004  -0.00001   0.00002   0.00096
   D59        3.14098   0.00000   0.00002   0.00003   0.00005   3.14103
   D60       -3.13999   0.00000   0.00002  -0.00001   0.00001  -3.13998
   D61        0.00006   0.00000   0.00001   0.00003   0.00004   0.00010
   D62       -0.00494   0.00000  -0.00003   0.00003   0.00001  -0.00493
   D63        3.13426   0.00000  -0.00005   0.00005   0.00000   3.13426
   D64        3.13812   0.00000  -0.00001  -0.00001  -0.00002   3.13811
   D65       -0.00587   0.00000  -0.00004   0.00002  -0.00002  -0.00589
   D66       -0.00063   0.00000  -0.00008  -0.00010  -0.00018  -0.00081
   D67        3.13945   0.00000  -0.00009  -0.00006  -0.00015   3.13929
   D68        0.00285   0.00000  -0.00006   0.00004  -0.00002   0.00283
   D69        3.13012   0.00000  -0.00009   0.00005  -0.00005   3.13007
   D70       -3.13628   0.00000  -0.00004   0.00002  -0.00002  -3.13630
   D71       -0.00902   0.00000  -0.00007   0.00003  -0.00004  -0.00906
   D72        0.77682   0.00000  -0.00278  -0.00177  -0.00456   0.77226
   D73       -2.40142   0.00000  -0.00337  -0.00173  -0.00510  -2.40652
   D74        2.89033   0.00001  -0.00260  -0.00172  -0.00433   2.88600
   D75       -0.28792   0.00000  -0.00319  -0.00168  -0.00487  -0.29279
   D76       -1.31500   0.00000  -0.00293  -0.00178  -0.00471  -1.31971
   D77        1.78994  -0.00001  -0.00352  -0.00173  -0.00525   1.78469
   D78        3.10575  -0.00001  -0.00066   0.00000  -0.00067   3.10508
   D79       -0.05140  -0.00001  -0.00073  -0.00003  -0.00076  -0.05216
   D80        0.00043   0.00000  -0.00007  -0.00005  -0.00012   0.00031
   D81        3.12646   0.00000  -0.00014  -0.00007  -0.00021   3.12625
   D82       -3.09718   0.00000   0.00068   0.00000   0.00068  -3.09650
   D83        0.04744   0.00000   0.00072   0.00005   0.00077   0.04822
   D84        0.00832   0.00000   0.00010   0.00005   0.00016   0.00848
   D85       -3.13024   0.00000   0.00015   0.00010   0.00025  -3.12999
   D86       -0.00784   0.00000  -0.00002   0.00001  -0.00002  -0.00786
   D87        3.13516   0.00000  -0.00002   0.00000  -0.00002   3.13513
   D88       -3.13373   0.00000   0.00004   0.00003   0.00008  -3.13365
   D89        0.00928   0.00000   0.00005   0.00002   0.00007   0.00935
   D90        0.00651   0.00000   0.00009   0.00003   0.00012   0.00663
   D91       -3.13963   0.00000  -0.00001   0.00006   0.00005  -3.13959
   D92       -3.13649   0.00000   0.00008   0.00004   0.00012  -3.13637
   D93        0.00055   0.00000  -0.00001   0.00007   0.00006   0.00060
   D94        0.00220   0.00000  -0.00005  -0.00003  -0.00008   0.00212
   D95        3.13346   0.00000  -0.00014  -0.00002  -0.00016   3.13329
   D96       -3.13484   0.00000   0.00004  -0.00005  -0.00001  -3.13485
   D97       -0.00358   0.00000  -0.00005  -0.00005  -0.00010  -0.00368
   D98       -0.00968   0.00000  -0.00004  -0.00001  -0.00006  -0.00974
   D99        3.12888   0.00000  -0.00009  -0.00006  -0.00015   3.12873
   D100      -3.14098   0.00000   0.00004  -0.00002   0.00003  -3.14095
   D101      -0.00241   0.00000   0.00000  -0.00006  -0.00007  -0.00248
         Item               Value     Threshold  Converged?
 Maximum Force            0.000045     0.000450     YES
 RMS     Force            0.000009     0.000300     YES
 Maximum Displacement     0.018754     0.001800     NO 
 RMS     Displacement     0.003420     0.001200     NO 
 Predicted change in Energy=-1.218331D-07
 GradGradGradGradGradGradGradGradGradGradGradGradGradGradGradGradGradGrad

                          Input orientation:                          
 ---------------------------------------------------------------------
 Center     Atomic      Atomic             Coordinates (Angstroms)
 Number     Number       Type             X           Y           Z
 ---------------------------------------------------------------------
      1          6           0       -0.000933   -0.011251   -0.001015
      2          6           0       -0.001701   -0.012906    1.381455
      3          6           0        1.212111   -0.000945    2.092737
      4          6           0        2.423363    0.013445    1.390823
      5          6           0        2.405217    0.013978   -0.003027
      6          6           0        1.206591    0.002369   -0.734558
      7          8           0        1.096613    0.000637    3.448613
      8          6           0        1.267901    0.005774   -2.190410
      9          6           0        0.244240    0.008605   -3.069805
     10          6           0        0.518877    0.004096   -4.526014
     11          6           0       -0.626566    0.065273   -5.488326
     12          6           0       -0.332375   -0.073387   -6.854837
     13          6           0       -1.331872   -0.024823   -7.816070
     14          6           0       -2.663820    0.172327   -7.425854
     15          6           0       -2.978758    0.320224   -6.070323
     16          6           0       -1.968019    0.264688   -5.118119
     17          8           0       -3.690264    0.230279   -8.319279
     18          6           0        2.288572   -0.017186    4.238763
     19          6           0        1.907206   -0.071198    5.697554
     20          6           0        0.898720   -0.935835    6.141034
     21          6           0        0.581948   -1.011655    7.496134
     22          6           0        1.274955   -0.231852    8.425255
     23          6           0        2.281282    0.630161    7.990367
     24          6           0        2.590747    0.713119    6.631570
     25          8           0        1.673508   -0.056357   -4.953060
     26          1           0       -0.951709   -0.021344   -0.524454
     27          1           0       -0.928486   -0.022525    1.945369
     28          1           0        3.373229    0.026276    1.911092
     29          1           0        3.349121    0.024932   -0.541305
     30          1           0        2.265233    0.006707   -2.628133
     31          1           0       -0.784074    0.001932   -2.727052
     32          1           0        0.704520   -0.220017   -7.136633
     33          1           0       -1.086161   -0.138385   -8.870088
     34          1           0       -4.013618    0.478867   -5.786756
     35          1           0       -2.240935    0.393467   -4.076740
     36          1           0       -3.340441    0.116966   -9.213193
     37          1           0        2.892558    0.876381    4.033250
     38          1           0        2.889838   -0.896524    3.963292
     39          1           0        0.356157   -1.535618    5.417315
     40          1           0       -0.206058   -1.681155    7.828615
     41          1           0        1.028117   -0.293527    9.481049
     42          1           0        2.819761    1.245636    8.705009
     43          1           0        3.367821    1.395336    6.295636
 ---------------------------------------------------------------------
                    Distance matrix (angstroms):
                    1          2          3          4          5
     1  C    0.000000
     2  C    1.382471   0.000000
     3  C    2.419789   1.406913   0.000000
     4  C    2.795538   2.425225   1.400008   0.000000
     5  C    2.406283   2.776826   2.411628   1.393969   0.000000
     6  C    1.412935   2.436741   2.827302   2.449061   1.404271
     7  O    3.620039   2.340859   1.360788   2.448454   3.691401
     8  C    2.530549   3.790838   4.283515   3.763028   2.465400
     9  C    3.078632   4.458100   5.252495   4.964454   3.751663
    10  C    4.554784   5.930386   6.654958   6.215796   4.900590
    11  C    5.523392   6.898583   7.801130   7.525121   6.267602
    12  C    6.862112   8.243148   9.080185   8.694397   7.378979
    13  C    7.927589   9.293221  10.230194   9.943346   8.660888
    14  C    7.890051   9.202710  10.278932  10.180298   8.989915
    15  C    6.768591   8.031366   9.181617   9.216601   8.117453
    16  C    5.489110   6.796170   7.885444   7.855806   6.734405
    17  O    9.102913  10.381179  11.510727  11.476478  10.313182
    18  C    4.818463   3.661909   2.400929   2.851293   4.243509
    19  C    6.009848   4.719750   3.671893   4.338377   5.722927
    20  C    6.276066   4.931141   4.166647   5.078403   6.396966
    21  C    7.586026   6.223138   5.533113   6.458828   7.785477
    22  C    8.525173   7.161907   6.337038   7.131777   8.507283
    23  C    8.335592   7.021628   6.026895   6.629819   8.018066
    24  C    7.157702   5.900136   4.797033   5.289895   6.673912
    25  O    5.227671   6.552427   7.061106   6.388428   5.004315
    26  H    1.085387   2.129571   3.395912   3.880800   3.397364
    27  H    2.156129   1.084907   2.145772   3.397603   3.861497
    28  H    3.878470   3.416460   2.168909   1.083093   2.145006
    29  H    3.393536   3.863476   3.391999   2.142494   1.086655
    30  H    3.469522   4.606101   4.836914   4.022072   2.628846
    31  H    2.836329   4.182362   5.216812   5.219644   4.194285
    32  H    7.173444   8.549822   9.245913   8.702094   7.337265
    33  H    8.936126  10.309507  11.201985  10.845557   9.530881
    34  H    7.058092   8.229251   9.467042   9.652408   8.652692
    35  H    4.668291   5.913645   7.081068   7.196828   6.190789
    36  H    9.799642  11.109033  12.188670  12.069686  10.855890
    37  H    5.043360   4.024871   2.712784   2.819082   4.156053
    38  H    4.985578   3.975885   2.667546   2.768255   4.098239
    39  H    5.639992   4.328381   3.760412   4.783887   5.998334
    40  H    8.008356   6.662634   6.142851   7.157562   8.427743
    41  H    9.541916   8.169621   7.396392   8.215394   9.588465
    42  H    9.237474   7.948523   6.918139   7.427835   8.804472
    43  H    7.278380   6.122582   4.925551   5.182549   6.519810
                    6          7          8          9         10
     6  C    0.000000
     7  O    4.184616   0.000000
     8  C    1.457146   5.641626   0.000000
     9  C    2.525775   6.573916   1.349528   0.000000
    10  C    3.853323   7.995528   2.452772   1.481888   0.000000
    11  C    5.095364   9.101780   3.803787   2.571139   1.497272
    12  C    6.311257  10.402334   4.931940   3.829579   2.480735
    13  C    7.522789  11.523510   6.197404   5.001228   3.774993
    14  C    7.731909  11.507579   6.549508   5.240113   4.308936
    15  C    6.788856  10.359582   5.760792   4.414513   3.836440
    16  C    5.418724   9.102230   4.371464   3.025766   2.569659
    17  O    9.031010  12.706306   7.886498   6.564026   5.670704
    18  C    5.089694   1.430182   6.509728   7.589145   8.941678
    19  C    6.470574   2.391643   7.914202   8.924035  10.317678
    20  C    6.946134   2.857494   8.392608   9.282234  10.715114
    21  C    8.316412   4.203812   9.763955  10.620453  12.065147
    22  C    9.163062   4.985261  10.618326  11.543682  12.975465
    23  C    8.813251   4.735744  10.250122  11.263359  12.655348
    24  C    7.528671   3.587657   8.948607  10.005953  11.370446
    25  O    4.244670   8.421649   2.792958   2.365096   1.232557
    26  H    2.168632   4.470052   2.775394   2.812473   4.263303
    27  H    3.426541   2.522162   4.682903   5.150556   6.631318
    28  H    3.419701   2.747291   4.610330   5.882195   7.041602
    29  H    2.151347   4.581903   2.655445   4.004231   4.887599
    30  H    2.169417   6.188098   1.089162   2.068693   2.579093
    31  H    2.816519   6.455681   2.120991   1.083953   2.221250
    32  H    6.425582  10.594804   4.983323   4.099173   2.626789
    33  H    8.453602  12.511364   7.083819   5.952719   4.633295
    34  H    7.280271  10.565756   6.407181   5.072704   4.728465
    35  H    4.817528   8.241631   4.002559   2.708898   2.823122
    36  H    9.621636  13.417239   8.400516   7.113571   6.072620
    37  H    5.132093   2.081861   6.490871   7.630204   8.925035
    38  H    5.070613   2.070132   6.427508   7.568546   8.860073
    39  H    6.397982   2.604639   7.815666   8.627187  10.063150
    40  H    8.840688   4.869271  10.266408  11.037827  12.490095
    41  H   10.221449   6.039992  11.677758  12.578938  14.019477
    42  H    9.656782   5.670005  11.075002  12.116509  13.486863
    43  H    7.485646   3.899886   8.851753   9.969517  11.276531
                   11         12         13         14         15
    11  C    0.000000
    12  C    1.404680   0.000000
    13  C    2.433920   1.387560   0.000000
    14  C    2.813517   2.412897   1.401864   0.000000
    15  C    2.436499   2.788141   2.424649   1.399472   0.000000
    16  C    1.405816   2.409526   2.787013   2.412117   1.389737
    17  O    4.174658   3.675898   2.424935   1.362041   2.360537
    18  C   10.154856  11.399144  12.586766  12.673808  11.581704
    19  C   11.470071  12.750617  13.896467  13.898828  12.747893
    20  C   11.771607  13.082510  14.163553  14.070543  12.873608
    21  C   13.084971  14.410645  15.462863  15.316741  14.089048
    22  C   14.046060  15.365215  16.450503  16.338145  15.116900
    23  C   13.800356  15.089938  16.227364  16.196404  15.015561
    24  C   12.556380  13.821953  14.988856  15.017127  13.874863
    25  O    2.364666   2.764165   4.150919   4.997942   4.799340
    26  H    4.975264   6.360820   7.301521   7.113238   5.914581
    27  H    7.440342   8.820519   9.769771   9.532533   8.280847
    28  H    8.411377   9.517507  10.805474  11.119616  10.204760
    29  H    6.346710   7.309156   8.650802   9.141892   8.408287
    30  H    4.067755   4.961754   6.313069   6.880488   6.280637
    31  H    2.766488   4.153109   5.118487   5.063716   4.011908
    32  H    2.137779   1.084464   2.155604   3.403424   3.872391
    33  H    3.418921   2.152593   1.088220   2.161333   3.410414
    34  H    3.425236   3.872639   3.400527   2.145358   1.084672
    35  H    2.169441   3.402701   3.870911   3.382943   2.126998
    36  H    4.608951   3.827080   2.450797   1.911926   3.170135
    37  H   10.183445  11.395293  12.612073  12.754611  11.698883
    38  H   10.130312  11.317778  12.543367  12.716061  11.687357
    39  H   11.066237  12.378122  13.425886  13.303546  12.105026
    40  H   13.437550  14.771751  15.772352  15.561967  14.313416
    41  H   15.064823  16.393918  17.459441  17.311580  16.070996
    42  H   14.653367  15.930617  17.082042  17.071215  15.899360
    43  H   12.513431  13.739852  14.941360  15.038475  13.941015
                   16         17         18         19         20
    16  C    0.000000
    17  O    3.635208   0.000000
    18  C   10.283446  13.910865   0.000000
    19  C   11.493866  15.096164   1.508783   0.000000
    20  C   11.680239  15.215757   2.528683   1.400470   0.000000
    21  C   12.932546  16.429288   3.809461   2.423976   1.393696
    22  C   13.935079  17.471302   4.312797   2.804622   2.419671
    23  C   13.784866  17.373078   3.807051   2.426691   2.789955
    24  C   12.611052  16.223813   2.519956   1.398130   2.413012
    25  O    3.659377   6.339057   9.212462  10.653188  11.155837
    26  H    4.713434   8.265731   5.760875   6.847573   6.977758
    27  H    7.145347  10.632702   3.950841   4.703446   4.666521
    28  H    8.831511  12.433626   2.568350   4.061528   4.994122
    29  H    7.019736  10.492473   4.896488   6.404040   7.182005
    30  H    4.918029   8.240575   6.866978   8.333746   8.924911
    31  H    2.681039   6.306432   7.613416   8.844338   9.074919
    32  H    3.384052   4.573352  11.486949  12.891274  13.298367
    33  H    3.875231   2.687127  13.536820  14.872154  15.162766
    34  H    2.162735   2.565156  11.852203  12.932444  12.977081
    35  H    1.084222   4.486237   9.478009  10.628255  10.771601
    36  H    4.321457   0.966591  14.582829  15.808339  15.963432
    37  H   10.380122  14.011994   1.097951   2.153771   3.420858
    38  H   10.364324  13.979591   1.100291   2.157404   2.951043
    39  H   10.937928  14.428650   2.725592   2.151468   1.085304
    40  H   13.210176  16.629726   4.677501   3.405771   2.150341
    41  H   14.913891  18.422518   5.398766   3.890638   3.403675
    42  H   14.661649  18.254801   4.671641   3.407579   3.875974
    43  H   12.650034  16.271745   2.718589   2.154488   3.399223
                   21         22         23         24         25
    21  C    0.000000
    22  C    1.397003   0.000000
    23  C    2.414034   1.394593   0.000000
    24  C    2.785245   2.416937   1.396059   0.000000
    25  O   12.533417  13.385401  12.975862  11.646333   0.000000
    26  H    8.225731   9.224946   9.131203   8.018547   5.148354
    27  H    5.837018   6.847473   6.875362   5.906492   7.372913
    28  H    6.329395   6.848628   6.206013   4.833936   7.071949
    29  H    8.563421   9.206916   8.619513   7.245610   4.719944
    30  H   10.313646  11.100223  10.636799   9.292313   2.399875
    31  H   10.363730  11.343201  11.164862   9.973916   3.316357
    32  H   14.654678  15.572344  15.232699  13.928101   2.394517
    33  H   16.474174  17.456016  17.210615  15.954501   4.792245
    34  H   14.134215  15.180757  15.147864  14.067243   5.772774
    35  H   11.994767  13.002015  12.888814  11.752243   4.036477
    36  H   17.200596  18.235636  18.106065  16.928996   6.581676
    37  H    4.571122   4.809836   4.011614   2.620879   9.116461
    38  H    4.221443   4.791529   4.349533   3.130514   9.038068
    39  H    2.155692   3.404658   3.875216   3.394794  10.557856
    40  H    1.086153   2.156353   3.399295   3.871380  13.020905
    41  H    2.157467   1.086017   2.155401   3.402158  14.450477
    42  H    3.400668   2.155843   1.086039   2.152945  13.767786
    43  H    3.872453   3.400457   2.153641   1.087251  11.467837
                   26         27         28         29         30
    26  H    0.000000
    27  H    2.469933   0.000000
    28  H    4.963793   4.302128   0.000000
    29  H    4.301112   4.948103   2.452516   0.000000
    30  H    3.843822   5.578317   4.672538   2.351595   0.000000
    31  H    2.209091   4.674717   6.228655   4.675609   3.050915
    32  H    6.819346   9.229761   9.436313   7.110012   4.776379
    33  H    8.347538  10.817227  11.668210   9.437533   7.086247
    34  H    6.108791   8.339976  10.678353   9.051560   7.044416
    35  H    3.801698   6.177489   8.216313   6.624488   4.749062
    36  H    9.012178  11.417114  12.993510  10.952641   8.648627
    37  H    6.029674   4.446083   2.336082   4.675465   6.747141
    38  H    5.971874   4.406300   2.301467   4.620759   6.682278
    39  H    6.269622   3.999271   4.882196   6.848234   8.411455
    40  H    8.548961   6.155123   7.123461   9.252330  10.876569
    41  H   10.203131   7.790263   7.931335  10.292525  12.175915
    42  H   10.050483   7.832644   6.924628   9.341556  11.414139
    43  H    8.196277   6.276417   4.593319   6.972957   9.098223
                   31         32         33         34         35
    31  H    0.000000
    32  H    4.659354   0.000000
    33  H    6.152060   2.493606   0.000000
    34  H    4.474283   4.956958   4.296270   0.000000
    35  H    2.024204   4.291272   4.959088   2.464519   0.000000
    36  H    6.972680   4.559317   2.294494   3.510642   5.260087
    37  H    7.744932  11.434855  13.540905  12.011903   9.610302
    38  H    7.685411  11.333208  13.456559  12.025508   9.624501
    39  H    8.366296  12.627501  14.427835  12.193617  10.030121
    40  H   10.704625  15.063955  16.792898  14.301802  12.254887
    41  H   12.345407  16.620995  18.473183  16.097253  13.963248
    42  H   12.050993  16.049299  18.057015  16.040394  13.773523
    43  H   10.029392  13.788706  15.880474  14.188367  11.834191
                   36         37         38         39         40
    36  H    0.000000
    37  H   14.659306   0.000000
    38  H   14.610383   1.774287   0.000000
    39  H   15.180502   3.763868   2.990345   0.000000
    40  H   17.420701   5.526953   5.014074   2.480249   0.000000
    41  H   19.202278   5.875656   5.854507   4.302122   2.485808
    42  H   18.981147   4.686894   5.203618   4.961214   4.299971
    43  H   16.945760   2.369299   3.304682   4.293258   4.958572
                   41         42         43
    41  H    0.000000
    42  H    2.486211   0.000000
    43  H    4.298061   2.475451   0.000000
 Stoichiometry    C22H18O3
 Framework group  C1[X(C22H18O3)]
 Deg. of freedom   123
 Full point group                 C1      NOp   1
 Largest Abelian subgroup         C1      NOp   1
 Largest concise Abelian subgroup C1      NOp   1
                         Standard orientation:                         
 ---------------------------------------------------------------------
 Center     Atomic      Atomic             Coordinates (Angstroms)
 Number     Number       Type             X           Y           Z
 ---------------------------------------------------------------------
      1          6           0        0.222861   -0.466623    0.017588
      2          6           0        1.564151   -0.799494    0.054501
      3          6           0        2.547079    0.206677    0.024911
      4          6           0        2.158088    1.549918   -0.041508
      5          6           0        0.801207    1.867130   -0.078904
      6          6           0       -0.197709    0.880558   -0.050294
      7          8           0        3.834829   -0.230814    0.070114
      8          6           0       -1.595620    1.289824   -0.090566
      9          6           0       -2.696004    0.509134   -0.060504
     10          6           0       -4.042662    1.124786   -0.119469
     11          6           0       -5.253760    0.249243   -0.027315
     12          6           0       -6.506667    0.854819   -0.218696
     13          6           0       -7.681310    0.119754   -0.146480
     14          6           0       -7.627040   -1.253796    0.128541
     15          6           0       -6.389932   -1.876327    0.329887
     16          6           0       -5.221233   -1.128587    0.249891
     17          8           0       -8.742530   -2.030739    0.213382
     18          6           0        4.889455    0.733576    0.014092
     19          6           0        6.213731    0.010607    0.020101
     20          6           0        6.413531   -1.121479   -0.779761
     21          6           0        7.653105   -1.758161   -0.801678
     22          6           0        8.710308   -1.266211   -0.032312
     23          6           0        8.518362   -0.138427    0.765278
     24          6           0        7.273331    0.492459    0.794589
     25          8           0       -4.177493    2.342964   -0.250086
     26          1           0       -0.514347   -1.262891    0.040982
     27          1           0        1.887817   -1.833641    0.107459
     28          1           0        2.891960    2.346217   -0.062213
     29          1           0        0.506528    2.911784   -0.130680
     30          1           0       -1.779685    2.361547   -0.152244
     31          1           0       -2.611484   -0.570124   -0.005636
     32          1           0       -6.527690    1.919205   -0.425346
     33          1           0       -8.643069    0.604694   -0.301646
     34          1           0       -6.366878   -2.938495    0.548476
     35          1           0       -4.278530   -1.636008    0.421272
     36          1           0       -9.523813   -1.483341    0.057664
     37          1           0        4.822514    1.418109    0.869912
     38          1           0        4.780333    1.333397   -0.901850
     39          1           0        5.589266   -1.506923   -1.371288
     40          1           0        7.795507   -2.639032   -1.420966
     41          1           0        9.676124   -1.762443   -0.051983
     42          1           0        9.332600    0.246113    1.372425
     43          1           0        7.124752    1.364273    1.427028
 ---------------------------------------------------------------------
 Rotational constants (GHZ):      0.9073782      0.0487983      0.0466953
 Standard basis: 6-31G(d,p) (6D, 7F)
 There are   465 symmetry adapted basis functions of A   symmetry.
 Integral buffers will be    262144 words long.
 Raffenetti 2 integral format.
 Two-electron integral symmetry is turned on.
   465 basis functions,   826 primitive gaussians,   465 cartesian basis functions
    87 alpha electrons       87 beta electrons
       nuclear repulsion energy      1771.9834827024 Hartrees.
 NAtoms=   43 NActive=   43 NUniq=   43 SFac= 7.50D-01 NAtFMM=   80 NAOKFM=F Big=F
 One-electron integrals computed using PRISM.
 NBasis=   465 RedAO= T  NBF=   465
 NBsUse=   465 1.00D-06 NBFU=   465
 Initial guess read from the read-write file.
 B after Tr=     0.000000    0.000000    0.000000
         Rot=    1.000000    0.000000    0.000000    0.000000 Ang=   0.00 deg.
 Initial guess orbital symmetries:
       Occupied  (A) (A) (A) (A) (A) (A) (A) (A) (A) (A) (A) (A)
                 (A) (A) (A) (A) (A) (A) (A) (A) (A) (A) (A) (A)
                 (A) (A) (A) (A) (A) (A) (A) (A) (A) (A) (A) (A)
                 (A) (A) (A) (A) (A) (A) (A) (A) (A) (A) (A) (A)
                 (A) (A) (A) (A) (A) (A) (A) (A) (A) (A) (A) (A)
                 (A) (A) (A) (A) (A) (A) (A) (A) (A) (A) (A) (A)
                 (A) (A) (A) (A) (A) (A) (A) (A) (A) (A) (A) (A)
                 (A) (A) (A)
       Virtual   (A) (A) (A) (A) (A) (A) (A) (A) (A) (A) (A) (A)
                 (A) (A) (A) (A) (A) (A) (A) (A) (A) (A) (A) (A)
                 (A) (A) (A) (A) (A) (A) (A) (A) (A) (A) (A) (A)
                 (A) (A) (A) (A) (A) (A) (A) (A) (A) (A) (A) (A)
                 (A) (A) (A) (A) (A) (A) (A) (A) (A) (A) (A) (A)
                 (A) (A) (A) (A) (A) (A) (A) (A) (A) (A) (A) (A)
                 (A) (A) (A) (A) (A) (A) (A) (A) (A) (A) (A) (A)
                 (A) (A) (A) (A) (A) (A) (A) (A) (A) (A) (A) (A)
                 (A) (A) (A) (A) (A) (A) (A) (A) (A) (A) (A) (A)
                 (A) (A) (A) (A) (A) (A) (A) (A) (A) (A) (A) (A)
                 (A) (A) (A) (A) (A) (A) (A) (A) (A) (A) (A) (A)
                 (A) (A) (A) (A) (A) (A) (A) (A) (A) (A) (A) (A)
                 (A) (A) (A) (A) (A) (A) (A) (A) (A) (A) (A) (A)
                 (A) (A) (A) (A) (A) (A) (A) (A) (A) (A) (A) (A)
                 (A) (A) (A) (A) (A) (A) (A) (A) (A) (A) (A) (A)
                 (A) (A) (A) (A) (A) (A) (A) (A) (A) (A) (A) (A)
                 (A) (A) (A) (A) (A) (A) (A) (A) (A) (A) (A) (A)
                 (A) (A) (A) (A) (A) (A) (A) (A) (A) (A) (A) (A)
                 (A) (A) (A) (A) (A) (A) (A) (A) (A) (A) (A) (A)
                 (A) (A) (A) (A) (A) (A) (A) (A) (A) (A) (A) (A)
                 (A) (A) (A) (A) (A) (A) (A) (A) (A) (A) (A) (A)
                 (A) (A) (A) (A) (A) (A) (A) (A) (A) (A) (A) (A)
                 (A) (A) (A) (A) (A) (A) (A) (A) (A) (A) (A) (A)
                 (A) (A) (A) (A) (A) (A) (A) (A) (A) (A) (A) (A)
                 (A) (A) (A) (A) (A) (A) (A) (A) (A) (A) (A) (A)
                 (A) (A) (A) (A) (A) (A) (A) (A) (A) (A) (A) (A)
                 (A) (A) (A) (A) (A) (A) (A) (A) (A) (A) (A) (A)
                 (A) (A) (A) (A) (A) (A) (A) (A) (A) (A) (A) (A)
                 (A) (A) (A) (A) (A) (A) (A) (A) (A) (A) (A) (A)
                 (A) (A) (A) (A) (A) (A) (A) (A) (A) (A) (A) (A)
                 (A) (A) (A) (A) (A) (A) (A) (A) (A) (A) (A) (A)
                 (A) (A) (A) (A) (A) (A)
 Requested convergence on RMS density matrix=1.00D-08 within 128 cycles.
 Requested convergence on MAX density matrix=1.00D-06.
 Requested convergence on             energy=1.00D-06.
 No special actions if energy rises.
 SCF Done:  E(RB3LYP) =  -1074.86483088     A.U. after    7 cycles
             Convg  =    0.8929D-08             -V/T =  2.0095
 Calling FoFJK, ICntrl=      2127 FMM=F ISym2X=0 I1Cent= 0 IOpClX= 0 NMat=1 NMatS=1 NMatT=0.
 ***** Axes restored to original set *****
 -------------------------------------------------------------------
 Center     Atomic                   Forces (Hartrees/Bohr)
 Number     Number              X              Y              Z
 -------------------------------------------------------------------
      1        6           0.000001427    0.000002715    0.000000824
      2        6           0.000001722   -0.000009885   -0.000000025
      3        6          -0.000002618   -0.000015028   -0.000004323
      4        6          -0.000002883    0.000010490   -0.000002158
      5        6          -0.000000282    0.000001633    0.000001163
      6        6          -0.000000707    0.000001823    0.000002381
      7        8           0.000003251    0.000024979    0.000004789
      8        6           0.000003072    0.000006287    0.000000301
      9        6          -0.000004337   -0.000009861   -0.000005468
     10        6           0.000004660    0.000024969   -0.000004864
     11        6          -0.000000402   -0.000003677    0.000006560
     12        6          -0.000000860    0.000006344   -0.000002334
     13        6           0.000000562    0.000000757    0.000004156
     14        6           0.000001107   -0.000003984   -0.000008209
     15        6           0.000005536   -0.000004308    0.000006566
     16        6           0.000001173   -0.000003470   -0.000004892
     17        8          -0.000006924   -0.000003561    0.000010297
     18        6          -0.000008084   -0.000020805   -0.000004259
     19        6           0.000003700    0.000005620    0.000003284
     20        6           0.000008966    0.000006263   -0.000005004
     21        6          -0.000000278   -0.000008908    0.000005066
     22        6          -0.000001619   -0.000005596   -0.000005599
     23        6          -0.000001108   -0.000000883   -0.000002334
     24        6          -0.000006046   -0.000001588    0.000012583
     25        8          -0.000001197   -0.000000813   -0.000000042
     26        1           0.000000012    0.000000530   -0.000000877
     27        1          -0.000001337   -0.000005638    0.000000838
     28        1           0.000000473    0.000006155    0.000001942
     29        1           0.000000720    0.000010176    0.000000101
     30        1          -0.000000258    0.000012328   -0.000000218
     31        1           0.000001857   -0.000003891    0.000004292
     32        1           0.000002837    0.000006289    0.000000767
     33        1           0.000002446    0.000003246   -0.000002534
     34        1          -0.000002065   -0.000008198    0.000000303
     35        1          -0.000004149   -0.000004475    0.000000618
     36        1           0.000006327   -0.000003880   -0.000010698
     37        1          -0.000005190    0.000007426    0.000003512
     38        1           0.000006229    0.000005131   -0.000006985
     39        1           0.000001689   -0.000009394   -0.000001741
     40        1           0.000002932   -0.000009152   -0.000001422
     41        1          -0.000001210   -0.000006771    0.000001560
     42        1          -0.000005252   -0.000001073    0.000002489
     43        1          -0.000003893    0.000001680   -0.000000406
 -------------------------------------------------------------------
 Cartesian Forces:  Max     0.000024979 RMS     0.000006123

 GradGradGradGradGradGradGradGradGradGradGradGradGradGradGradGradGradGrad
 Berny optimization.
 Using GEDIIS/GDIIS optimizer.
 Internal  Forces:  Max     0.000013731 RMS     0.000002892
 Search for a local minimum.
 Step number   6 out of a maximum of  227
 All quantities printed in internal units (Hartrees-Bohrs-Radians)
 Mixed Optimization -- En-DIIS/RFO-DIIS
 Swaping is turned off.
 Update second derivatives using D2CorX and points    1    2    3    4    5
                                                      6
 DE=  3.21D-07 DEPred=-1.22D-07 R=-2.64D+00
 Trust test=-2.64D+00 RLast= 1.25D-02 DXMaxT set to 5.00D-02
     Eigenvalues ---    0.00033   0.00580   0.00872   0.01081   0.01315
     Eigenvalues ---    0.01540   0.01652   0.01777   0.01902   0.01953
     Eigenvalues ---    0.02031   0.02036   0.02053   0.02064   0.02089
     Eigenvalues ---    0.02089   0.02097   0.02104   0.02118   0.02121
     Eigenvalues ---    0.02125   0.02127   0.02130   0.02139   0.02143
     Eigenvalues ---    0.02144   0.02147   0.02149   0.02151   0.02152
     Eigenvalues ---    0.02158   0.02173   0.02186   0.02193   0.02203
     Eigenvalues ---    0.02299   0.02768   0.04956   0.06399   0.07348
     Eigenvalues ---    0.11393   0.13949   0.15986   0.15993   0.15999
     Eigenvalues ---    0.15999   0.15999   0.16000   0.16000   0.16000
     Eigenvalues ---    0.16000   0.16000   0.16000   0.16000   0.16001
     Eigenvalues ---    0.16007   0.16041   0.16454   0.21967   0.21996
     Eigenvalues ---    0.22000   0.22002   0.22020   0.22046   0.22323
     Eigenvalues ---    0.22958   0.22988   0.23493   0.23997   0.24043
     Eigenvalues ---    0.24849   0.24977   0.25000   0.25000   0.25004
     Eigenvalues ---    0.25054   0.25889   0.31454   0.31556   0.33680
     Eigenvalues ---    0.33899   0.34339   0.34452   0.34925   0.35049
     Eigenvalues ---    0.35136   0.35206   0.35264   0.35277   0.35283
     Eigenvalues ---    0.35350   0.35400   0.35430   0.35458   0.35505
     Eigenvalues ---    0.35596   0.35812   0.37312   0.38354   0.40246
     Eigenvalues ---    0.40982   0.41624   0.41870   0.41971   0.42033
     Eigenvalues ---    0.42623   0.44623   0.44751   0.45220   0.45393
     Eigenvalues ---    0.45653   0.45941   0.46046   0.46232   0.46390
     Eigenvalues ---    0.46526   0.47613   0.48018   0.52537   0.52843
     Eigenvalues ---    0.55070   0.55314   0.901871000.000001000.00000
     Eigenvalues --- 1000.000001000.000001000.000001000.000001000.00000
     Eigenvalues --- 1000.000001000.000001000.000001000.000001000.00000
     Eigenvalues --- 1000.000001000.000001000.000001000.000001000.00000
     Eigenvalues --- 1000.000001000.000001000.000001000.000001000.00000
     Eigenvalues --- 1000.000001000.000001000.000001000.000001000.00000
     Eigenvalues --- 1000.000001000.000001000.000001000.000001000.00000
     Eigenvalues --- 1000.000001000.000001000.000001000.000001000.00000
     Eigenvalues --- 1000.000001000.000001000.000001000.000001000.00000
     Eigenvalues --- 1000.000001000.000001000.000001000.000001000.00000
     Eigenvalues --- 1000.000001000.000001000.000001000.000001000.00000
     Eigenvalues --- 1000.000001000.000001000.000001000.000001000.00000
     Eigenvalues --- 1000.000001000.000001000.000001000.000001000.00000
     Eigenvalues --- 1000.000001000.000001000.000001000.000001000.00000
     Eigenvalues --- 1000.000001000.000001000.000001000.000001000.00000
     Eigenvalues --- 1000.000001000.000001000.000001000.000001000.00000
     Eigenvalues --- 1000.000001000.000001000.000001000.000001000.00000
     Eigenvalues --- 1000.000001000.000001000.000001000.000001000.00000
     Eigenvalues --- 1000.000001000.000001000.000001000.000001000.00000
     Eigenvalues --- 1000.000001000.00000
 En-DIIS/RFO-DIIS IScMMF=        0 using points:     6    5    4    3    2
 RFO step:  Lambda= 0.00000000D+00.
 DIIS coeffs:      1.41282     -0.41068      0.04879     -0.04384     -0.00709
 Iteration  1 RMS(Cart)=  0.00294435 RMS(Int)=  0.00000313
 Iteration  2 RMS(Cart)=  0.00000528 RMS(Int)=  0.00000002
 Iteration  3 RMS(Cart)=  0.00000000 RMS(Int)=  0.00000002
 Variable       Old X    -DE/DX   Delta X   Delta X   Delta X     New X
                                  (DIIS)     (GDIIS)  (Total)
    R1        2.61249   0.00000   0.00001   0.00000   0.00001   2.61250
    R2        2.67006   0.00000   0.00000   0.00000   0.00000   2.67006
    R3        2.05108   0.00000   0.00000   0.00000   0.00000   2.05108
    R4        2.65868   0.00000  -0.00001   0.00000  -0.00002   2.65866
    R5        2.05018   0.00000  -0.00001   0.00000   0.00000   2.05017
    R6        2.64563   0.00000  -0.00001   0.00000  -0.00001   2.64562
    R7        2.57152   0.00000   0.00000   0.00001   0.00001   2.57153
    R8        2.63422   0.00000   0.00000   0.00000   0.00000   2.63422
    R9        2.04675   0.00000   0.00000   0.00000   0.00000   2.04675
   R10        2.65369   0.00000   0.00000   0.00000   0.00000   2.65369
   R11        2.05348   0.00000   0.00000   0.00000   0.00000   2.05348
   R12        2.75361   0.00000   0.00000   0.00001   0.00001   2.75362
   R13        2.70265   0.00000  -0.00014  -0.00002  -0.00016   2.70249
   R14        2.55024   0.00000  -0.00001   0.00001   0.00000   2.55023
   R15        2.05822   0.00000   0.00000   0.00000   0.00000   2.05822
   R16        2.80036   0.00000   0.00001   0.00001   0.00003   2.80039
   R17        2.04837   0.00000   0.00001  -0.00001   0.00000   2.04837
   R18        2.82943   0.00000  -0.00001   0.00000  -0.00001   2.82943
   R19        2.32920   0.00000   0.00000   0.00000   0.00000   2.32920
   R20        2.65446   0.00000  -0.00002   0.00000  -0.00002   2.65444
   R21        2.65661   0.00000   0.00001   0.00000   0.00001   2.65662
   R22        2.62211   0.00000   0.00001   0.00000   0.00001   2.62212
   R23        2.04934   0.00000   0.00000   0.00000   0.00000   2.04934
   R24        2.64914   0.00000   0.00000   0.00000  -0.00001   2.64913
   R25        2.05644   0.00000  -0.00001   0.00000  -0.00001   2.05643
   R26        2.64462   0.00000   0.00000   0.00001   0.00001   2.64462
   R27        2.57388   0.00000   0.00001   0.00000   0.00001   2.57389
   R28        2.62622   0.00000   0.00000  -0.00001  -0.00001   2.62622
   R29        2.04973   0.00000  -0.00001   0.00000   0.00000   2.04973
   R30        2.04888   0.00000   0.00000   0.00000   0.00000   2.04888
   R31        1.82659   0.00001  -0.00003   0.00002  -0.00001   1.82658
   R32        2.85119   0.00001   0.00004   0.00004   0.00008   2.85126
   R33        2.07483   0.00000   0.00001   0.00001   0.00002   2.07484
   R34        2.07925   0.00000   0.00001   0.00001   0.00002   2.07927
   R35        2.64650   0.00000  -0.00005  -0.00001  -0.00006   2.64645
   R36        2.64208   0.00000   0.00004   0.00001   0.00005   2.64214
   R37        2.63370   0.00000   0.00003   0.00002   0.00005   2.63375
   R38        2.05093   0.00000  -0.00003   0.00000  -0.00003   2.05090
   R39        2.63995   0.00000  -0.00003  -0.00002  -0.00005   2.63990
   R40        2.05253   0.00000   0.00000   0.00000   0.00000   2.05253
   R41        2.63540   0.00000   0.00003   0.00001   0.00004   2.63544
   R42        2.05228   0.00000  -0.00001   0.00000   0.00000   2.05227
   R43        2.63817   0.00000  -0.00003  -0.00001  -0.00004   2.63813
   R44        2.05232   0.00000   0.00000   0.00000   0.00000   2.05232
   R45        2.05461   0.00000   0.00000   0.00000   0.00001   2.05461
    A1        2.11724   0.00000  -0.00001   0.00000   0.00000   2.11723
    A2        2.07346   0.00000   0.00000   0.00000   0.00000   2.07346
    A3        2.09249   0.00000   0.00000   0.00000   0.00000   2.09249
    A4        2.10026   0.00000   0.00000   0.00000  -0.00001   2.10025
    A5        2.11796   0.00000  -0.00001   0.00000  -0.00001   2.11795
    A6        2.06496   0.00000   0.00001   0.00000   0.00001   2.06498
    A7        2.08638   0.00000   0.00002   0.00000   0.00002   2.08640
    A8        2.01587   0.00000   0.00001   0.00000   0.00001   2.01588
    A9        2.18093   0.00000  -0.00002   0.00000  -0.00003   2.18090
   A10        2.08296   0.00000  -0.00001   0.00000  -0.00001   2.08295
   A11        2.11536   0.00000   0.00001  -0.00001   0.00000   2.11535
   A12        2.08487   0.00000   0.00001   0.00000   0.00001   2.08488
   A13        2.13175   0.00000   0.00000   0.00000   0.00000   2.13175
   A14        2.07602   0.00000   0.00000   0.00000   0.00000   2.07603
   A15        2.07541   0.00000   0.00000   0.00000   0.00000   2.07540
   A16        2.04778   0.00000   0.00001   0.00000   0.00000   2.04778
   A17        2.15878   0.00000   0.00000   0.00000   0.00000   2.15878
   A18        2.07663   0.00000   0.00000   0.00000   0.00000   2.07663
   A19        2.07115   0.00000   0.00004   0.00003   0.00007   2.07122
   A20        2.23845   0.00000   0.00001   0.00000   0.00001   2.23846
   A21        2.02647   0.00000   0.00000   0.00000   0.00000   2.02647
   A22        2.01827   0.00000   0.00000  -0.00001  -0.00001   2.01826
   A23        2.09411   0.00000   0.00001  -0.00001   0.00001   2.09412
   A24        2.11010   0.00000   0.00006  -0.00003   0.00003   2.11012
   A25        2.07890   0.00001  -0.00007   0.00004  -0.00004   2.07887
   A26        2.08251   0.00000  -0.00004   0.00004   0.00001   2.08251
   A27        2.11091   0.00000   0.00003  -0.00002   0.00001   2.11092
   A28        2.08975   0.00000   0.00001  -0.00003  -0.00002   2.08974
   A29        2.04991  -0.00001   0.00005  -0.00004   0.00001   2.04992
   A30        2.17310   0.00001  -0.00007   0.00005  -0.00002   2.17307
   A31        2.06013   0.00000   0.00003  -0.00001   0.00001   2.06014
   A32        2.11719   0.00000  -0.00002   0.00001  -0.00001   2.11718
   A33        2.05600   0.00000   0.00003  -0.00001   0.00002   2.05601
   A34        2.11000   0.00000  -0.00001   0.00000  -0.00001   2.10999
   A35        2.09035   0.00000   0.00000   0.00000   0.00000   2.09035
   A36        2.09981   0.00000   0.00001   0.00000   0.00000   2.09981
   A37        2.09302   0.00000   0.00000   0.00000   0.00000   2.09302
   A38        2.09243   0.00000   0.00003  -0.00001   0.00001   2.09244
   A39        2.14054   0.00000  -0.00001   0.00001   0.00000   2.14054
   A40        2.05021   0.00000  -0.00001   0.00000  -0.00001   2.05020
   A41        2.08951   0.00000  -0.00002   0.00001  -0.00001   2.08950
   A42        2.07531   0.00000   0.00000  -0.00001  -0.00001   2.07531
   A43        2.11836   0.00000   0.00002   0.00000   0.00002   2.11838
   A44        2.11674   0.00000  -0.00001   0.00000   0.00000   2.11674
   A45        2.10595   0.00000  -0.00005   0.00002  -0.00003   2.10592
   A46        2.06040   0.00000   0.00006  -0.00003   0.00003   2.06043
   A47        1.90593   0.00000   0.00002  -0.00001   0.00002   1.90595
   A48        1.90071   0.00000   0.00013   0.00003   0.00015   1.90086
   A49        1.92295   0.00000   0.00004  -0.00001   0.00003   1.92297
   A50        1.90400   0.00000   0.00006   0.00000   0.00005   1.90406
   A51        1.92747   0.00000  -0.00004  -0.00003  -0.00007   1.92740
   A52        1.93006   0.00001  -0.00012   0.00004  -0.00009   1.92997
   A53        1.87858   0.00000  -0.00006  -0.00003  -0.00008   1.87850
   A54        2.10632  -0.00001   0.00021   0.00000   0.00021   2.10653
   A55        2.09700   0.00001  -0.00023   0.00001  -0.00022   2.09678
   A56        2.07928   0.00000   0.00001  -0.00002   0.00000   2.07927
   A57        2.10036   0.00000  -0.00003   0.00001  -0.00002   2.10034
   A58        2.08292   0.00000  -0.00002   0.00000  -0.00001   2.08290
   A59        2.09980   0.00000   0.00005  -0.00002   0.00003   2.09984
   A60        2.09849   0.00000   0.00005  -0.00001   0.00004   2.09853
   A61        2.08986   0.00000  -0.00004   0.00000  -0.00004   2.08981
   A62        2.09483   0.00000   0.00000   0.00001   0.00000   2.09484
   A63        2.08931   0.00000  -0.00003   0.00000  -0.00003   2.08927
   A64        2.09685   0.00000   0.00002   0.00000   0.00002   2.09687
   A65        2.09702   0.00000   0.00001   0.00000   0.00001   2.09703
   A66        2.09463   0.00000   0.00001   0.00001   0.00001   2.09464
   A67        2.09772   0.00000   0.00000  -0.00001  -0.00001   2.09771
   A68        2.09079   0.00000   0.00000   0.00000   0.00000   2.09079
   A69        2.10425   0.00000   0.00000   0.00000   0.00000   2.10425
   A70        2.08864   0.00000   0.00003  -0.00001   0.00002   2.08866
   A71        2.09030   0.00000  -0.00003   0.00001  -0.00002   2.09028
    D1        0.00000   0.00000  -0.00002   0.00003   0.00001   0.00001
    D2        3.14069   0.00000   0.00000   0.00000   0.00000   3.14069
    D3        3.14087   0.00000  -0.00002   0.00007   0.00005   3.14092
    D4       -0.00162   0.00000   0.00000   0.00004   0.00004  -0.00157
    D5        0.00014   0.00000  -0.00004  -0.00007  -0.00010   0.00004
    D6       -3.14075   0.00000  -0.00005  -0.00009  -0.00013  -3.14088
    D7       -3.14073   0.00000  -0.00003  -0.00011  -0.00014  -3.14087
    D8        0.00157   0.00000  -0.00005  -0.00013  -0.00017   0.00139
    D9        0.00063   0.00000   0.00006   0.00002   0.00008   0.00072
   D10        3.13800   0.00000   0.00005  -0.00003   0.00002   3.13802
   D11       -3.14009   0.00000   0.00004   0.00005   0.00009  -3.14000
   D12       -0.00272   0.00000   0.00002   0.00000   0.00003  -0.00270
   D13       -0.00139   0.00000  -0.00005  -0.00003  -0.00008  -0.00147
   D14        3.13792   0.00000  -0.00012  -0.00002  -0.00013   3.13778
   D15       -3.13833   0.00000  -0.00003   0.00002  -0.00001  -3.13834
   D16        0.00098   0.00000  -0.00010   0.00004  -0.00007   0.00091
   D17        3.11789  -0.00001  -0.00023  -0.00057  -0.00079   3.11710
   D18       -0.02819  -0.00001  -0.00024  -0.00061  -0.00086  -0.02905
   D19        0.00157   0.00000  -0.00001  -0.00001  -0.00002   0.00155
   D20       -3.14132   0.00000   0.00001   0.00001   0.00002  -3.14130
   D21       -3.13778   0.00000   0.00006  -0.00002   0.00004  -3.13774
   D22        0.00251   0.00000   0.00008   0.00000   0.00008   0.00259
   D23       -0.00093   0.00000   0.00005   0.00006   0.00011  -0.00082
   D24        3.13999   0.00000   0.00006   0.00008   0.00014   3.14013
   D25       -3.14122   0.00000   0.00003   0.00004   0.00006  -3.14116
   D26       -0.00030   0.00000   0.00004   0.00006   0.00009  -0.00021
   D27        0.01086  -0.00001  -0.00021  -0.00061  -0.00082   0.01004
   D28       -3.13137  -0.00001  -0.00018  -0.00054  -0.00072  -3.13210
   D29       -3.13002  -0.00001  -0.00022  -0.00063  -0.00085  -3.13087
   D30        0.01094  -0.00001  -0.00019  -0.00056  -0.00075   0.01018
   D31       -3.09987   0.00000   0.00053   0.00048   0.00100  -3.09887
   D32        1.06681   0.00001   0.00047   0.00050   0.00097   1.06778
   D33       -0.99183   0.00001   0.00049   0.00054   0.00103  -0.99080
   D34       -3.13555   0.00000   0.00001   0.00002   0.00004  -3.13551
   D35       -0.00711   0.00000  -0.00003  -0.00005  -0.00007  -0.00718
   D36        0.00668   0.00000  -0.00001  -0.00005  -0.00006   0.00662
   D37        3.13512   0.00000  -0.00005  -0.00012  -0.00017   3.13495
   D38       -3.09718   0.00000   0.00039   0.00000   0.00039  -3.09679
   D39        0.05121   0.00000   0.00043   0.00001   0.00044   0.05165
   D40        0.05733   0.00000   0.00043   0.00007   0.00050   0.05783
   D41       -3.07746   0.00000   0.00047   0.00008   0.00055  -3.07691
   D42       -3.03509   0.00000  -0.00008  -0.00008  -0.00016  -3.03525
   D43        0.11821   0.00000  -0.00007  -0.00003  -0.00010   0.11811
   D44        0.09979   0.00000  -0.00012  -0.00009  -0.00021   0.09958
   D45       -3.03010   0.00000  -0.00011  -0.00004  -0.00015  -3.03025
   D46       -3.13788   0.00000   0.00002  -0.00001   0.00000  -3.13788
   D47        0.00352   0.00000   0.00001   0.00003   0.00004   0.00356
   D48       -0.00722   0.00000   0.00001  -0.00006  -0.00005  -0.00727
   D49        3.13418   0.00000   0.00001  -0.00002  -0.00001   3.13417
   D50        3.13298   0.00000  -0.00001   0.00000   0.00000   3.13297
   D51        0.00611   0.00000   0.00001  -0.00001   0.00000   0.00611
   D52        0.00316   0.00000   0.00000   0.00006   0.00006   0.00321
   D53       -3.12371   0.00000   0.00002   0.00004   0.00006  -3.12365
   D54        0.00523   0.00000  -0.00001   0.00004   0.00002   0.00525
   D55       -3.13703   0.00000  -0.00001   0.00003   0.00001  -3.13701
   D56       -3.13616   0.00000  -0.00001  -0.00001  -0.00002  -3.13618
   D57        0.00477   0.00000  -0.00001  -0.00002  -0.00003   0.00474
   D58        0.00096   0.00000   0.00001   0.00000   0.00001   0.00097
   D59        3.14103   0.00000   0.00002  -0.00002   0.00000   3.14103
   D60       -3.13998   0.00000   0.00001   0.00001   0.00002  -3.13996
   D61        0.00010   0.00000   0.00002  -0.00001   0.00000   0.00010
   D62       -0.00493   0.00000   0.00000  -0.00001  -0.00001  -0.00494
   D63        3.13426   0.00000   0.00000  -0.00001  -0.00001   3.13425
   D64        3.13811   0.00000  -0.00001   0.00002   0.00001   3.13811
   D65       -0.00589   0.00000  -0.00001   0.00002   0.00000  -0.00589
   D66       -0.00081   0.00000  -0.00007  -0.00002  -0.00009  -0.00091
   D67        3.13929   0.00000  -0.00006  -0.00005  -0.00011   3.13919
   D68        0.00283   0.00000   0.00000  -0.00002  -0.00003   0.00281
   D69        3.13007   0.00000  -0.00002  -0.00001  -0.00003   3.13004
   D70       -3.13630   0.00000   0.00000  -0.00002  -0.00002  -3.13632
   D71       -0.00906   0.00000  -0.00002  -0.00001  -0.00003  -0.00909
   D72        0.77226   0.00000  -0.00246  -0.00101  -0.00348   0.76878
   D73       -2.40652   0.00000  -0.00272  -0.00109  -0.00381  -2.41033
   D74        2.88600   0.00000  -0.00236  -0.00102  -0.00339   2.88261
   D75       -0.29279   0.00000  -0.00262  -0.00110  -0.00372  -0.29651
   D76       -1.31971   0.00000  -0.00254  -0.00105  -0.00359  -1.32330
   D77        1.78469   0.00000  -0.00280  -0.00112  -0.00392   1.78077
   D78        3.10508   0.00000  -0.00031  -0.00004  -0.00035   3.10473
   D79       -0.05216   0.00000  -0.00035  -0.00002  -0.00038  -0.05253
   D80        0.00031   0.00000  -0.00005   0.00003  -0.00002   0.00029
   D81        3.12625   0.00000  -0.00009   0.00005  -0.00004   3.12621
   D82       -3.09650   0.00000   0.00032   0.00004   0.00036  -3.09614
   D83        0.04822   0.00000   0.00036   0.00003   0.00039   0.04861
   D84        0.00848   0.00000   0.00006  -0.00003   0.00004   0.00852
   D85       -3.12999   0.00000   0.00011  -0.00004   0.00006  -3.12993
   D86       -0.00786   0.00000  -0.00001   0.00000  -0.00001  -0.00787
   D87        3.13513   0.00000  -0.00001  -0.00002  -0.00004   3.13510
   D88       -3.13365   0.00000   0.00003  -0.00002   0.00001  -3.13364
   D89        0.00935   0.00000   0.00003  -0.00004  -0.00001   0.00933
   D90        0.00663   0.00000   0.00005  -0.00003   0.00002   0.00665
   D91       -3.13959   0.00000   0.00002  -0.00002  -0.00001  -3.13959
   D92       -3.13637   0.00000   0.00005  -0.00001   0.00005  -3.13632
   D93        0.00060   0.00000   0.00002   0.00000   0.00002   0.00062
   D94        0.00212   0.00000  -0.00003   0.00003   0.00000   0.00212
   D95        3.13329   0.00000  -0.00007   0.00002  -0.00006   3.13324
   D96       -3.13485   0.00000   0.00000   0.00002   0.00003  -3.13482
   D97       -0.00368   0.00000  -0.00004   0.00001  -0.00003  -0.00371
   D98       -0.00974   0.00000  -0.00002  -0.00001  -0.00003  -0.00977
   D99        3.12873   0.00000  -0.00007   0.00001  -0.00006   3.12868
   D100      -3.14095   0.00000   0.00002   0.00001   0.00003  -3.14092
   D101      -0.00248   0.00000  -0.00003   0.00003   0.00000  -0.00248
         Item               Value     Threshold  Converged?
 Maximum Force            0.000014     0.000450     YES
 RMS     Force            0.000003     0.000300     YES
 Maximum Displacement     0.016124     0.001800     NO 
 RMS     Displacement     0.002944     0.001200     NO 
 Predicted change in Energy=-4.643343D-08
 GradGradGradGradGradGradGradGradGradGradGradGradGradGradGradGradGradGrad

                          Input orientation:                          
 ---------------------------------------------------------------------
 Center     Atomic      Atomic             Coordinates (Angstroms)
 Number     Number       Type             X           Y           Z
 ---------------------------------------------------------------------
      1          6           0       -0.001078   -0.009449   -0.001042
      2          6           0       -0.001895   -0.011011    1.381431
      3          6           0        1.211888    0.001197    2.092742
      4          6           0        2.423163    0.015840    1.390883
      5          6           0        2.405067    0.016281   -0.002968
      6          6           0        1.206469    0.004309   -0.734541
      7          8           0        1.096367    0.002826    3.448623
      8          6           0        1.267830    0.007465   -2.190399
      9          6           0        0.244209    0.009038   -3.069841
     10          6           0        0.518910    0.004456   -4.526053
     11          6           0       -0.626523    0.064740   -5.488425
     12          6           0       -0.332173   -0.073768   -6.854908
     13          6           0       -1.331677   -0.025982   -7.816181
     14          6           0       -2.663775    0.170233   -7.426018
     15          6           0       -2.978876    0.318001   -6.070509
     16          6           0       -1.968131    0.263253   -5.118270
     17          8           0       -3.690234    0.227397   -8.319485
     18          6           0        2.288176   -0.015742    4.238827
     19          6           0        1.906879   -0.070978    5.697632
     20          6           0        0.895586   -0.932818    6.140070
     21          6           0        0.579300   -1.009989    7.495233
     22          6           0        1.275569   -0.234407    8.425408
     23          6           0        2.284725    0.624835    7.991524
     24          6           0        2.593716    0.709209    6.632729
     25          8           0        1.673590   -0.055387   -4.953055
     26          1           0       -0.951833   -0.019686   -0.524513
     27          1           0       -0.928701   -0.020739    1.945307
     28          1           0        3.372999    0.028989    1.911195
     29          1           0        3.348985    0.027410   -0.541216
     30          1           0        2.265175    0.009249   -2.628087
     31          1           0       -0.784122    0.001298   -2.727164
     32          1           0        0.704831   -0.219687   -7.136667
     33          1           0       -1.085854   -0.139425   -8.870183
     34          1           0       -4.013862    0.475925   -5.787004
     35          1           0       -2.241134    0.391935   -4.076904
     36          1           0       -3.340306    0.114370   -9.213388
     37          1           0        2.892277    0.877946    4.034129
     38          1           0        2.889474   -0.894863    3.962686
     39          1           0        0.350496   -1.529300    5.415546
     40          1           0       -0.210931   -1.677274    7.826890
     41          1           0        1.029090   -0.297140    9.481221
     42          1           0        2.825756    1.237103    8.706991
     43          1           0        3.372994    1.389326    6.297633
 ---------------------------------------------------------------------
                    Distance matrix (angstroms):
                    1          2          3          4          5
     1  C    0.000000
     2  C    1.382474   0.000000
     3  C    2.419780   1.406905   0.000000
     4  C    2.795540   2.425225   1.400003   0.000000
     5  C    2.406284   2.776828   2.411619   1.393969   0.000000
     6  C    1.412933   2.436743   2.827290   2.449062   1.404272
     7  O    3.620045   2.340865   1.360794   2.448438   3.691390
     8  C    2.530553   3.790846   4.283511   3.763037   2.465408
     9  C    3.078642   4.458115   5.252497   4.964468   3.751676
    10  C    4.554811   5.930417   6.654974   6.215822   4.900615
    11  C    5.523410   6.898610   7.801147   7.525148   6.267625
    12  C    6.862160   8.243198   9.080209   8.694422   7.379002
    13  C    7.927621   9.293257  10.230212   9.943370   8.660909
    14  C    7.890026   9.202696  10.278917  10.180301   8.989913
    15  C    6.768525   8.031318   9.181587   9.216599   8.117446
    16  C    5.489051   6.796133   7.885423   7.855810   6.734402
    17  O    9.102881  10.381159  11.510709  11.476481  10.313181
    18  C    4.818425   3.661851   2.400909   2.851316   4.243527
    19  C    6.009906   4.719809   3.671982   4.338453   5.722993
    20  C    6.274541   4.929487   4.165728   5.078210   6.396580
    21  C    7.584989   6.222083   5.532591   6.458734   7.785222
    22  C    8.525578   7.162361   6.337367   7.131909   8.507416
    23  C    8.337165   7.023265   6.027896   6.630121   8.018524
    24  C    7.159354   5.901867   4.798146   5.290255   6.674445
    25  O    5.227720   6.552476   7.061135   6.388465   5.004353
    26  H    1.085385   2.129573   3.395902   3.880799   3.397364
    27  H    2.156128   1.084906   2.145772   3.397605   3.861497
    28  H    3.878470   3.416454   2.168901   1.083091   2.145012
    29  H    3.393534   3.863476   3.391992   2.142495   1.086653
    30  H    3.469527   4.606110   4.836911   4.022080   2.628853
    31  H    2.836373   4.182413   5.216852   5.219693   4.194329
    32  H    7.173539   8.549913   9.245966   8.702141   7.337312
    33  H    8.936179  10.309561  11.202014  10.845588   9.530911
    34  H    7.058000   8.229183   9.467007   9.652410   8.652687
    35  H    4.668148   5.913542   7.081001   7.196792   6.190740
    36  H    9.799648  11.109046  12.188678  12.069708  10.855909
    37  H    5.043965   4.025330   2.713186   2.819583   4.156681
    38  H    4.985016   3.975434   2.667191   2.767850   4.097712
    39  H    5.636752   4.324750   3.758383   4.783442   5.997531
    40  H    8.006385   6.660635   6.141834   7.157323   8.427233
    41  H    9.542396   8.170152   7.396759   8.215532   9.588607
    42  H    9.239844   7.950926   6.919561   7.428257   8.805156
    43  H    7.281088   6.125345   4.927310   5.183130   6.520714
                    6          7          8          9         10
     6  C    0.000000
     7  O    4.184612   0.000000
     8  C    1.457154   5.641630   0.000000
     9  C    2.525786   6.573932   1.349526   0.000000
    10  C    3.853349   7.995556   2.452788   1.481903   0.000000
    11  C    5.095383   9.101813   3.803791   2.571152   1.497268
    12  C    6.311292  10.402372   4.931963   3.829596   2.480731
    13  C    7.522814  11.523543   6.197417   5.001239   3.774989
    14  C    7.731894  11.507585   6.549482   5.240099   4.308917
    15  C    6.788819  10.359575   5.760746   4.414492   3.836426
    16  C    5.418691   9.102232   4.371419   3.025745   2.569645
    17  O    9.030993  12.706311   7.886473   6.564014   5.670689
    18  C    5.089684   1.430096   6.509731   7.589140   8.941691
    19  C    6.470632   2.391739   7.914263   8.924094  10.317746
    20  C    6.945151   2.856507   8.391627   9.280832  10.713848
    21  C    8.315727   4.203357   9.763234  10.619392  12.064164
    22  C    9.163319   4.985658  10.618564  11.543990  12.975744
    23  C    8.814301   4.736775  10.251184  11.264844  12.656726
    24  C    7.529807   3.588811   8.949749  10.007511  11.371891
    25  O    4.244718   8.421684   2.793002   2.365117   1.232557
    26  H    2.168629   4.470060   2.775394   2.812478   4.263331
    27  H    3.426538   2.522184   4.682906   5.150565   6.631344
    28  H    3.419705   2.747257   4.610344   5.882215   7.041633
    29  H    2.151345   4.581889   2.655449   4.004237   4.887614
    30  H    2.169424   6.188098   1.089161   2.068683   2.579096
    31  H    2.816559   6.455740   2.121005   1.083952   2.221240
    32  H    6.425655  10.594865   4.983386   4.099215   2.626807
    33  H    8.453643  12.511407   7.083849   5.952737   4.633296
    34  H    7.280223  10.565749   6.407128   5.072684   4.728457
    35  H    4.817428   8.241594   4.002443   2.708822   2.823070
    36  H    9.621649  13.417266   8.400519   7.113579   6.072622
    37  H    5.132778   2.081813   6.491634   7.631098   8.925950
    38  H    5.070005   2.070105   6.426848   7.567754   8.859291
    39  H    6.395953   2.602407   7.813677   8.624359  10.060624
    40  H    8.839391   4.868366  10.265045  11.035830  12.488238
    41  H   10.221747   6.040426  11.678034  12.579306  14.019806
    42  H    9.658385   5.671390  11.076653  12.118841  13.489048
    43  H    7.487561   3.901573   8.853696   9.972164  11.279000
                   11         12         13         14         15
    11  C    0.000000
    12  C    1.404672   0.000000
    13  C    2.433911   1.387565   0.000000
    14  C    2.813502   2.412896   1.401860   0.000000
    15  C    2.436499   2.788154   2.424657   1.399475   0.000000
    16  C    1.405822   2.409534   2.787016   2.412110   1.389734
    17  O    4.174647   3.675902   2.424934   1.362045   2.360536
    18  C   10.154870  11.399147  12.586766  12.673793  11.581693
    19  C   11.470153  12.750671  13.896525  13.898893  12.747981
    20  C   11.770039  13.081086  14.161921  14.068565  12.871450
    21  C   13.083746  14.409505  15.461549  15.315162  14.087353
    22  C   14.046429  15.365503  16.450847  16.338600  15.117442
    23  C   13.802105  15.091479  16.229155  16.198609  15.018003
    24  C   12.558170  13.823539  14.990671  15.019323  13.877286
    25  O    2.364651   2.764140   4.150902   4.997918   4.799330
    26  H    4.975276   6.360880   7.301557   7.113198   5.914474
    27  H    7.440362   8.820569   9.769804   9.532507   8.280777
    28  H    8.411411   9.517533  10.805501  11.119629  10.204776
    29  H    6.346726   7.309163   8.650813   9.141891   8.408290
    30  H    4.067742   4.961766   6.313074   6.880451   6.280578
    31  H    2.766483   4.153091   5.118463   5.063681   4.011883
    32  H    2.137781   1.084463   2.155604   3.403420   3.872403
    33  H    3.418911   2.152598   1.088218   2.161327   3.410417
    34  H    3.425243   3.872649   3.400527   2.145356   1.084671
    35  H    2.169428   3.402693   3.870912   3.382949   2.127014
    36  H    4.608951   3.827099   2.450811   1.911938   3.170140
    37  H   10.184414  11.396226  12.613038  12.755609  11.699901
    38  H   10.129490  11.316958  12.542519  12.715171  11.686469
    39  H   11.063097  12.375324  13.422678  13.299625  12.100690
    40  H   13.435212  14.769601  15.769861  15.558950  14.310148
    41  H   15.065268  16.394268  17.459865  17.312147  16.071667
    42  H   14.656142  15.933098  17.084931  17.074752  15.903239
    43  H   12.516462  13.742570  14.944456  15.042186  13.945067
                   16         17         18         19         20
    16  C    0.000000
    17  O    3.635203   0.000000
    18  C   10.283445  13.910848   0.000000
    19  C   11.493961  15.096233   1.508824   0.000000
    20  C   11.678256  15.213630   2.528845   1.400440   0.000000
    21  C   12.931009  16.427578   3.809588   2.423959   1.393721
    22  C   13.935582  17.471802   4.312846   2.804643   2.419697
    23  C   13.787103  17.375474   3.806978   2.426698   2.789959
    24  C   12.613298  16.226178   2.519856   1.398158   2.413009
    25  O    3.659367   6.339040   9.212491  10.653253  11.154936
    26  H    4.713334   8.265680   5.760823   6.847624   6.975918
    27  H    7.145291  10.632666   3.950766   4.703507   4.664327
    28  H    8.831531  12.433641   2.568407   4.061601   4.994600
    29  H    7.019741  10.492476   4.896529   6.404106   7.181976
    30  H    4.917968   8.240539   6.866998   8.333811   8.924340
    31  H    2.681024   6.306398   7.613431   8.844427   9.073137
    32  H    3.384064   4.573351  11.486968  12.891325  13.297243
    33  H    3.875231   2.687121  13.536821  14.872201  15.161242
    34  H    2.162741   2.565144  11.852202  12.932560  12.974680
    35  H    1.084220   4.486252   9.477987  10.628351  10.769426
    36  H    4.321461   0.966586  14.582827  15.808409  15.961455
    37  H   10.381128  14.013010   1.097960   2.153765   3.420617
    38  H   10.363461  13.978688   1.100303   2.157386   2.952631
    39  H   10.933918  14.424443   2.725826   2.151418   1.085287
    40  H   13.207216  16.626447   4.677651   3.405737   2.150339
    41  H   14.914506  18.423145   5.398812   3.890657   3.403704
    42  H   14.665182  18.258656   4.671520   3.407588   3.875977
    43  H   12.653793  16.275730   2.718405   2.154526   3.399224
                   21         22         23         24         25
    21  C    0.000000
    22  C    1.396977   0.000000
    23  C    2.414007   1.394613   0.000000
    24  C    2.785216   2.416944   1.396037   0.000000
    25  O   12.532701  13.385579  12.976837  11.647387   0.000000
    26  H    8.224439   9.225427   9.133105   8.020494   5.148408
    27  H    5.835611   6.848077   6.877471   5.908652   7.372959
    28  H    6.329747   6.848617   6.205624   4.833514   7.071990
    29  H    8.563402   9.206951   8.619583   7.245741   4.719971
    30  H   10.313226  11.100380  10.637456   9.293040   2.399922
    31  H   10.362384  11.343621  11.166776   9.975897   3.316347
    32  H   14.653765  15.572544  15.233891  13.929357   2.394504
    33  H   16.472931  17.456311  17.212265  15.956180   4.792232
    34  H   14.132334  15.181412  15.150650  14.069977   5.772770
    35  H   11.993106  13.002588  12.891260  11.754687   4.036435
    36  H   17.198997  18.236092  18.108300  16.931210   6.581672
    37  H    4.570929   4.809823   4.011752   2.621131   9.117335
    38  H    4.222445   4.791323   4.348188   3.128841   9.037341
    39  H    2.155721   3.404670   3.875203   3.394774  10.556083
    40  H    1.086154   2.156333   3.399281   3.871352  13.019559
    41  H    2.157455   1.086015   2.155424   3.402161  14.450680
    42  H    3.400639   2.155855   1.086039   2.152923  13.769345
    43  H    3.872426   3.400459   2.153612   1.087254  11.469662
                   26         27         28         29         30
    26  H    0.000000
    27  H    2.469929   0.000000
    28  H    4.963790   4.302123   0.000000
    29  H    4.301108   4.948102   2.452530   0.000000
    30  H    3.843826   5.578322   4.672553   2.351596   0.000000
    31  H    2.209125   4.674759   6.228707   4.675641   3.050916
    32  H    6.819466   9.229857   9.436354   7.110034   4.776440
    33  H    8.347604  10.817283  11.668241   9.437548   7.086273
    34  H    6.108638   8.339875  10.678377   9.051573   7.044348
    35  H    3.801475   6.177362   8.216298   6.624455   4.748931
    36  H    9.012176  11.417118  12.993541  10.952659   8.648621
    37  H    6.030269   4.446424   2.336380   4.676086   6.747816
    38  H    5.971308   4.405947   2.301285   4.620267   6.681725
    39  H    6.265724   3.994328   4.883059   6.848160   8.410301
    40  H    8.546489   6.152424   7.123997   9.252251  10.875753
    41  H   10.203713   7.790978   7.931302  10.292545  12.176088
    42  H   10.053376   7.835718   6.924006   9.341652  11.415160
    43  H    8.199458   6.279777   4.592532   6.973180   9.099470
                   31         32         33         34         35
    31  H    0.000000
    32  H    4.659350   0.000000
    33  H    6.152035   2.493606   0.000000
    34  H    4.474272   4.956968   4.296264   0.000000
    35  H    2.024174   4.291264   4.959087   2.464560   0.000000
    36  H    6.972659   4.559331   2.294505   3.510628   5.260104
    37  H    7.745935  11.435752  13.541855  12.012952   9.611294
    38  H    7.684562  11.332438  13.455721  12.024622   9.623616
    39  H    8.362644  12.625320  14.424871  12.188752  10.025682
    40  H   10.702065  15.062245  16.790554  14.298134  12.251680
    41  H   12.345908  16.621232  18.473545  16.098064  13.963951
    42  H   12.053975  16.051233  18.059694  16.044801  13.777360
    43  H   10.032705  13.790882  15.883357  14.192899  11.838253
                   36         37         38         39         40
    36  H    0.000000
    37  H   14.660316   0.000000
    38  H   14.609505   1.774250   0.000000
    39  H   15.176606   3.763482   2.993279   0.000000
    40  H   17.417636   5.526670   5.015650   2.480257   0.000000
    41  H   19.202848   5.875636   5.854274   4.302141   2.485806
    42  H   18.984753   4.687116   5.201708   4.961200   4.299958
    43  H   16.949504   2.369820   3.302012   4.293244   4.958546
                   41         42         43
    41  H    0.000000
    42  H    2.486230   0.000000
    43  H    4.298056   2.475409   0.000000
 Stoichiometry    C22H18O3
 Framework group  C1[X(C22H18O3)]
 Deg. of freedom   123
 Full point group                 C1      NOp   1
 Largest Abelian subgroup         C1      NOp   1
 Largest concise Abelian subgroup C1      NOp   1
                         Standard orientation:                         
 ---------------------------------------------------------------------
 Center     Atomic      Atomic             Coordinates (Angstroms)
 Number     Number       Type             X           Y           Z
 ---------------------------------------------------------------------
      1          6           0       -0.222777   -0.466635   -0.019733
      2          6           0       -1.564053   -0.799543   -0.056959
      3          6           0       -2.547017    0.206561   -0.026671
      4          6           0       -2.158103    1.549774    0.040663
      5          6           0       -0.801239    1.867024    0.078354
      6          6           0        0.197724    0.880513    0.049178
      7          8           0       -3.834759   -0.230937   -0.072235
      8          6           0        1.595619    1.289809    0.089983
      9          6           0        2.696034    0.509147    0.060426
     10          6           0        4.042669    1.124833    0.119935
     11          6           0        5.253822    0.249369    0.027829
     12          6           0        6.506665    0.854957    0.219530
     13          6           0        7.681347    0.119938    0.147372
     14          6           0        7.627163   -1.253555   -0.127935
     15          6           0        6.390113   -1.876093   -0.329639
     16          6           0        5.221382   -1.128405   -0.249700
     17          8           0        8.742695   -2.030449   -0.212739
     18          6           0       -4.889428    0.733181   -0.014564
     19          6           0       -6.213737    0.010185   -0.019910
     20          6           0       -6.411739   -1.124924    0.776052
     21          6           0       -7.651498   -1.761271    0.798850
     22          6           0       -8.710627   -1.265992    0.034332
     23          6           0       -8.520449   -0.135155   -0.759387
     24          6           0       -7.275298    0.495402   -0.789649
     25          8           0        4.177437    2.342968    0.251013
     26          1           0        0.514470   -1.262846   -0.043729
     27          1           0       -1.887660   -1.833666   -0.110705
     28          1           0       -2.892020    2.346019    0.061793
     29          1           0       -0.506609    2.911653    0.130864
     30          1           0        1.779641    2.361533    0.151750
     31          1           0        2.611594   -0.570123    0.005675
     32          1           0        6.527626    1.919296    0.426416
     33          1           0        8.643064    0.604871    0.302798
     34          1           0        6.367149   -2.938215   -0.548454
     35          1           0        4.278711   -1.635780   -0.421383
     36          1           0        9.523946   -1.483057   -0.056862
     37          1           0       -4.823366    1.418396   -0.869919
     38          1           0       -4.779620    1.332397    0.901705
     39          1           0       -5.585993   -1.512943    1.363788
     40          1           0       -7.792476   -2.644524    1.415063
     41          1           0       -9.676552   -1.761977    0.054695
     42          1           0       -9.336193    0.252000   -1.362836
     43          1           0       -7.128149    1.369595   -1.419138
 ---------------------------------------------------------------------
 Rotational constants (GHZ):      0.9076209      0.0487982      0.0466925
 Standard basis: 6-31G(d,p) (6D, 7F)
 There are   465 symmetry adapted basis functions of A   symmetry.
 Integral buffers will be    262144 words long.
 Raffenetti 2 integral format.
 Two-electron integral symmetry is turned on.
   465 basis functions,   826 primitive gaussians,   465 cartesian basis functions
    87 alpha electrons       87 beta electrons
       nuclear repulsion energy      1771.9828832700 Hartrees.
 NAtoms=   43 NActive=   43 NUniq=   43 SFac= 7.50D-01 NAtFMM=   80 NAOKFM=F Big=F
 One-electron integrals computed using PRISM.
 NBasis=   465 RedAO= T  NBF=   465
 NBsUse=   465 1.00D-06 NBFU=   465
 Initial guess read from the read-write file.
 B after Tr=     0.000000    0.000000    0.000000
         Rot=    1.000000    0.000000    0.000000    0.000000 Ang=   0.00 deg.
 Initial guess orbital symmetries:
       Occupied  (A) (A) (A) (A) (A) (A) (A) (A) (A) (A) (A) (A)
                 (A) (A) (A) (A) (A) (A) (A) (A) (A) (A) (A) (A)
                 (A) (A) (A) (A) (A) (A) (A) (A) (A) (A) (A) (A)
                 (A) (A) (A) (A) (A) (A) (A) (A) (A) (A) (A) (A)
                 (A) (A) (A) (A) (A) (A) (A) (A) (A) (A) (A) (A)
                 (A) (A) (A) (A) (A) (A) (A) (A) (A) (A) (A) (A)
                 (A) (A) (A) (A) (A) (A) (A) (A) (A) (A) (A) (A)
                 (A) (A) (A)
       Virtual   (A) (A) (A) (A) (A) (A) (A) (A) (A) (A) (A) (A)
                 (A) (A) (A) (A) (A) (A) (A) (A) (A) (A) (A) (A)
                 (A) (A) (A) (A) (A) (A) (A) (A) (A) (A) (A) (A)
                 (A) (A) (A) (A) (A) (A) (A) (A) (A) (A) (A) (A)
                 (A) (A) (A) (A) (A) (A) (A) (A) (A) (A) (A) (A)
                 (A) (A) (A) (A) (A) (A) (A) (A) (A) (A) (A) (A)
                 (A) (A) (A) (A) (A) (A) (A) (A) (A) (A) (A) (A)
                 (A) (A) (A) (A) (A) (A) (A) (A) (A) (A) (A) (A)
                 (A) (A) (A) (A) (A) (A) (A) (A) (A) (A) (A) (A)
                 (A) (A) (A) (A) (A) (A) (A) (A) (A) (A) (A) (A)
                 (A) (A) (A) (A) (A) (A) (A) (A) (A) (A) (A) (A)
                 (A) (A) (A) (A) (A) (A) (A) (A) (A) (A) (A) (A)
                 (A) (A) (A) (A) (A) (A) (A) (A) (A) (A) (A) (A)
                 (A) (A) (A) (A) (A) (A) (A) (A) (A) (A) (A) (A)
                 (A) (A) (A) (A) (A) (A) (A) (A) (A) (A) (A) (A)
                 (A) (A) (A) (A) (A) (A) (A) (A) (A) (A) (A) (A)
                 (A) (A) (A) (A) (A) (A) (A) (A) (A) (A) (A) (A)
                 (A) (A) (A) (A) (A) (A) (A) (A) (A) (A) (A) (A)
                 (A) (A) (A) (A) (A) (A) (A) (A) (A) (A) (A) (A)
                 (A) (A) (A) (A) (A) (A) (A) (A) (A) (A) (A) (A)
                 (A) (A) (A) (A) (A) (A) (A) (A) (A) (A) (A) (A)
                 (A) (A) (A) (A) (A) (A) (A) (A) (A) (A) (A) (A)
                 (A) (A) (A) (A) (A) (A) (A) (A) (A) (A) (A) (A)
                 (A) (A) (A) (A) (A) (A) (A) (A) (A) (A) (A) (A)
                 (A) (A) (A) (A) (A) (A) (A) (A) (A) (A) (A) (A)
                 (A) (A) (A) (A) (A) (A) (A) (A) (A) (A) (A) (A)
                 (A) (A) (A) (A) (A) (A) (A) (A) (A) (A) (A) (A)
                 (A) (A) (A) (A) (A) (A) (A) (A) (A) (A) (A) (A)
                 (A) (A) (A) (A) (A) (A) (A) (A) (A) (A) (A) (A)
                 (A) (A) (A) (A) (A) (A) (A) (A) (A) (A) (A) (A)
                 (A) (A) (A) (A) (A) (A) (A) (A) (A) (A) (A) (A)
                 (A) (A) (A) (A) (A) (A)
 Requested convergence on RMS density matrix=1.00D-08 within 128 cycles.
 Requested convergence on MAX density matrix=1.00D-06.
 Requested convergence on             energy=1.00D-06.
 No special actions if energy rises.
 EnCoef did     3 forward-backward iterations
 SCF Done:  E(RB3LYP) =  -1074.86483041     A.U. after   18 cycles
             Convg  =    0.7669D-08             -V/T =  2.0095
 Calling FoFJK, ICntrl=      2127 FMM=F ISym2X=0 I1Cent= 0 IOpClX= 0 NMat=1 NMatS=1 NMatT=0.
 ***** Axes restored to original set *****
 -------------------------------------------------------------------
 Center     Atomic                   Forces (Hartrees/Bohr)
 Number     Number              X              Y              Z
 -------------------------------------------------------------------
      1        6           0.000002768    0.000001651    0.000002253
      2        6           0.000000801   -0.000008815   -0.000002792
      3        6           0.000002760   -0.000011642    0.000001191
      4        6          -0.000004068    0.000010616   -0.000004501
      5        6          -0.000001288    0.000003171    0.000000129
      6        6          -0.000000772    0.000001728    0.000000854
      7        8          -0.000016163    0.000017169   -0.000000321
      8        6           0.000002543    0.000004073    0.000000980
      9        6          -0.000003854   -0.000009308   -0.000012784
     10        6           0.000007706    0.000014268   -0.000005237
     11        6          -0.000005568    0.000003981    0.000015159
     12        6          -0.000005524    0.000000804   -0.000010195
     13        6           0.000004261    0.000001699    0.000008171
     14        6          -0.000004761   -0.000002457   -0.000012120
     15        6           0.000007261   -0.000005269    0.000004875
     16        6           0.000006706   -0.000005014   -0.000007242
     17        8          -0.000007471   -0.000002429    0.000017543
     18        6           0.000005365   -0.000020032    0.000007073
     19        6           0.000020565    0.000015883    0.000001239
     20        6           0.000005667    0.000005944   -0.000001388
     21        6          -0.000005525   -0.000012620   -0.000003696
     22        6           0.000005813   -0.000000778   -0.000006277
     23        6          -0.000007639   -0.000002544    0.000003025
     24        6          -0.000011826   -0.000005189    0.000006613
     25        8          -0.000000464    0.000006855    0.000006280
     26        1          -0.000001082   -0.000000080   -0.000001614
     27        1          -0.000002052   -0.000005784    0.000001433
     28        1           0.000001267    0.000004844    0.000001740
     29        1           0.000001657    0.000010732    0.000000183
     30        1           0.000001199    0.000010991    0.000000216
     31        1           0.000002236    0.000000266    0.000007145
     32        1           0.000003464    0.000006776    0.000001763
     33        1           0.000003066    0.000003141   -0.000003935
     34        1          -0.000002715   -0.000007539    0.000001365
     35        1          -0.000007375   -0.000004852    0.000000602
     36        1           0.000009347   -0.000005456   -0.000014075
     37        1          -0.000004727    0.000008178    0.000001799
     38        1           0.000002381    0.000004487   -0.000006445
     39        1           0.000000592   -0.000012430   -0.000002952
     40        1           0.000003237   -0.000009466   -0.000001103
     41        1          -0.000001222   -0.000006389    0.000002410
     42        1          -0.000003992   -0.000000494    0.000003029
     43        1          -0.000002572    0.000001331   -0.000000393
 -------------------------------------------------------------------
 Cartesian Forces:  Max     0.000020565 RMS     0.000006890

 GradGradGradGradGradGradGradGradGradGradGradGradGradGradGradGradGradGrad
 Berny optimization.
 Using GEDIIS/GDIIS optimizer.
 Internal  Forces:  Max     0.000023989 RMS     0.000003897
 Search for a local minimum.
 Step number   7 out of a maximum of  227
 All quantities printed in internal units (Hartrees-Bohrs-Radians)
 Mixed Optimization -- En-DIIS/RFO-DIIS
 Swaping is turned off.
 Update second derivatives using D2CorX and points    1    2    3    4    5
                                                      6    7
 DE=  4.67D-07 DEPred=-4.64D-08 R=-1.01D+01
 Trust test=-1.01D+01 RLast= 9.44D-03 DXMaxT set to 5.00D-02
     Eigenvalues ---    0.00028   0.00395   0.00852   0.01061   0.01317
     Eigenvalues ---    0.01554   0.01661   0.01777   0.01899   0.01941
     Eigenvalues ---    0.02027   0.02037   0.02050   0.02067   0.02089
     Eigenvalues ---    0.02090   0.02098   0.02105   0.02118   0.02121
     Eigenvalues ---    0.02125   0.02128   0.02130   0.02139   0.02143
     Eigenvalues ---    0.02144   0.02147   0.02150   0.02151   0.02153
     Eigenvalues ---    0.02158   0.02173   0.02185   0.02192   0.02204
     Eigenvalues ---    0.02289   0.02768   0.04869   0.06395   0.07405
     Eigenvalues ---    0.11405   0.13939   0.15992   0.15994   0.15999
     Eigenvalues ---    0.15999   0.16000   0.16000   0.16000   0.16000
     Eigenvalues ---    0.16000   0.16000   0.16000   0.16000   0.16005
     Eigenvalues ---    0.16009   0.16040   0.16565   0.21978   0.21998
     Eigenvalues ---    0.22001   0.22005   0.22015   0.22049   0.22470
     Eigenvalues ---    0.22962   0.22987   0.23489   0.23999   0.24057
     Eigenvalues ---    0.24926   0.24986   0.25000   0.25001   0.25010
     Eigenvalues ---    0.25071   0.27496   0.31429   0.31862   0.33681
     Eigenvalues ---    0.33899   0.34430   0.34559   0.34927   0.35061
     Eigenvalues ---    0.35138   0.35207   0.35265   0.35277   0.35284
     Eigenvalues ---    0.35350   0.35401   0.35431   0.35459   0.35505
     Eigenvalues ---    0.35607   0.36028   0.37313   0.38837   0.40905
     Eigenvalues ---    0.41217   0.41625   0.41946   0.41994   0.42060
     Eigenvalues ---    0.43096   0.44623   0.44765   0.45306   0.45448
     Eigenvalues ---    0.45752   0.45943   0.46048   0.46282   0.46441
     Eigenvalues ---    0.46623   0.47695   0.48029   0.52579   0.52844
     Eigenvalues ---    0.55136   0.56059   0.902401000.000001000.00000
     Eigenvalues --- 1000.000001000.000001000.000001000.000001000.00000
     Eigenvalues --- 1000.000001000.000001000.000001000.000001000.00000
     Eigenvalues --- 1000.000001000.000001000.000001000.000001000.00000
     Eigenvalues --- 1000.000001000.000001000.000001000.000001000.00000
     Eigenvalues --- 1000.000001000.000001000.000001000.000001000.00000
     Eigenvalues --- 1000.000001000.000001000.000001000.000001000.00000
     Eigenvalues --- 1000.000001000.000001000.000001000.000001000.00000
     Eigenvalues --- 1000.000001000.000001000.000001000.000001000.00000
     Eigenvalues --- 1000.000001000.000001000.000001000.000001000.00000
     Eigenvalues --- 1000.000001000.000001000.000001000.000001000.00000
     Eigenvalues --- 1000.000001000.000001000.000001000.000001000.00000
     Eigenvalues --- 1000.000001000.000001000.000001000.000001000.00000
     Eigenvalues --- 1000.000001000.000001000.000001000.000001000.00000
     Eigenvalues --- 1000.000001000.000001000.000001000.000001000.00000
     Eigenvalues --- 1000.000001000.000001000.000001000.000001000.00000
     Eigenvalues --- 1000.000001000.000001000.000001000.000001000.00000
     Eigenvalues --- 1000.000001000.000001000.000001000.000001000.00000
     Eigenvalues --- 1000.000001000.000001000.000001000.000001000.00000
     Eigenvalues --- 1000.000001000.00000
 En-DIIS/RFO-DIIS IScMMF=        0 using points:     7    6    5    4    3
 RFO step:  Lambda= 0.00000000D+00.
 DIIS coeffs:      2.57521     -1.78760     -0.25681      0.20875      0.26044
 Iteration  1 RMS(Cart)=  0.00354813 RMS(Int)=  0.00000397
 Iteration  2 RMS(Cart)=  0.00000684 RMS(Int)=  0.00000005
 Iteration  3 RMS(Cart)=  0.00000000 RMS(Int)=  0.00000005
 Variable       Old X    -DE/DX   Delta X   Delta X   Delta X     New X
                                  (DIIS)     (GDIIS)  (Total)
    R1        2.61250   0.00000   0.00001   0.00000   0.00000   2.61250
    R2        2.67006   0.00000   0.00000   0.00000   0.00000   2.67005
    R3        2.05108   0.00000   0.00000   0.00000   0.00000   2.05108
    R4        2.65866   0.00000  -0.00001   0.00000  -0.00001   2.65865
    R5        2.05017   0.00000   0.00001   0.00000   0.00000   2.05018
    R6        2.64562   0.00000  -0.00001   0.00000  -0.00001   2.64562
    R7        2.57153   0.00000   0.00002  -0.00001   0.00001   2.57154
    R8        2.63422   0.00000   0.00000   0.00000   0.00000   2.63421
    R9        2.04675   0.00000   0.00001  -0.00001   0.00000   2.04675
   R10        2.65369   0.00000   0.00000   0.00000   0.00000   2.65369
   R11        2.05348   0.00000   0.00000   0.00000   0.00000   2.05348
   R12        2.75362   0.00000   0.00002  -0.00001   0.00001   2.75363
   R13        2.70249   0.00001  -0.00008   0.00001  -0.00008   2.70242
   R14        2.55023   0.00000   0.00001  -0.00001   0.00000   2.55024
   R15        2.05822   0.00000   0.00000   0.00000   0.00000   2.05822
   R16        2.80039  -0.00001   0.00002  -0.00003  -0.00001   2.80038
   R17        2.04837   0.00000   0.00001   0.00000   0.00000   2.04838
   R18        2.82943   0.00000  -0.00002   0.00001   0.00000   2.82942
   R19        2.32920   0.00000   0.00000   0.00000   0.00000   2.32919
   R20        2.65444   0.00001   0.00000   0.00001   0.00001   2.65445
   R21        2.65662   0.00000   0.00000   0.00000   0.00000   2.65661
   R22        2.62212   0.00000   0.00000  -0.00001   0.00000   2.62212
   R23        2.04934   0.00000   0.00000   0.00000   0.00000   2.04934
   R24        2.64913   0.00000  -0.00001   0.00000   0.00000   2.64913
   R25        2.05643   0.00000   0.00001   0.00000   0.00001   2.05644
   R26        2.64462   0.00000   0.00002  -0.00001   0.00001   2.64464
   R27        2.57389   0.00000   0.00001  -0.00001   0.00000   2.57389
   R28        2.62622   0.00000  -0.00001   0.00001  -0.00001   2.62621
   R29        2.04973   0.00000   0.00001   0.00000   0.00000   2.04974
   R30        2.04888   0.00000   0.00001   0.00000   0.00001   2.04888
   R31        1.82658   0.00002   0.00003  -0.00001   0.00002   1.82660
   R32        2.85126   0.00000   0.00007  -0.00003   0.00004   2.85130
   R33        2.07484   0.00000   0.00002   0.00001   0.00003   2.07487
   R34        2.07927   0.00000   0.00003  -0.00002   0.00001   2.07928
   R35        2.64645   0.00000  -0.00004   0.00001  -0.00003   2.64642
   R36        2.64214   0.00000   0.00004  -0.00002   0.00002   2.64215
   R37        2.63375   0.00000   0.00003   0.00000   0.00003   2.63378
   R38        2.05090   0.00001   0.00001  -0.00002  -0.00001   2.05089
   R39        2.63990   0.00000  -0.00003   0.00001  -0.00003   2.63988
   R40        2.05253   0.00000   0.00001  -0.00001   0.00000   2.05254
   R41        2.63544   0.00000   0.00002   0.00000   0.00002   2.63546
   R42        2.05227   0.00000   0.00001   0.00000   0.00001   2.05228
   R43        2.63813   0.00000  -0.00002  -0.00001  -0.00003   2.63810
   R44        2.05232   0.00000   0.00000   0.00000   0.00000   2.05232
   R45        2.05461   0.00000   0.00000   0.00001   0.00001   2.05462
    A1        2.11723   0.00000   0.00001   0.00000   0.00000   2.11724
    A2        2.07346   0.00000   0.00000   0.00000   0.00000   2.07346
    A3        2.09249   0.00000  -0.00001   0.00000  -0.00001   2.09248
    A4        2.10025   0.00000  -0.00001   0.00000  -0.00001   2.10025
    A5        2.11795   0.00000   0.00000  -0.00001   0.00000   2.11795
    A6        2.06498   0.00000   0.00001   0.00001   0.00001   2.06499
    A7        2.08640   0.00000   0.00001   0.00000   0.00001   2.08640
    A8        2.01588   0.00000   0.00001  -0.00001   0.00000   2.01588
    A9        2.18090   0.00000  -0.00002   0.00001  -0.00001   2.18089
   A10        2.08295   0.00000   0.00001   0.00000   0.00001   2.08296
   A11        2.11535   0.00000  -0.00002   0.00001  -0.00001   2.11534
   A12        2.08488   0.00000   0.00001  -0.00001   0.00000   2.08488
   A13        2.13175   0.00000  -0.00001   0.00000  -0.00001   2.13174
   A14        2.07603   0.00000   0.00000   0.00000   0.00000   2.07603
   A15        2.07540   0.00000   0.00000   0.00001   0.00001   2.07541
   A16        2.04778   0.00000   0.00000   0.00001   0.00000   2.04778
   A17        2.15878   0.00000   0.00000   0.00000   0.00000   2.15877
   A18        2.07663   0.00000   0.00001  -0.00001   0.00000   2.07663
   A19        2.07122   0.00000   0.00005  -0.00002   0.00003   2.07125
   A20        2.23846   0.00000  -0.00001   0.00000  -0.00001   2.23845
   A21        2.02647   0.00000   0.00001  -0.00001   0.00000   2.02647
   A22        2.01826   0.00000  -0.00001   0.00001   0.00001   2.01827
   A23        2.09412   0.00000   0.00000  -0.00001  -0.00001   2.09411
   A24        2.11012  -0.00001  -0.00003   0.00000  -0.00002   2.11010
   A25        2.07887   0.00001   0.00003   0.00001   0.00004   2.07890
   A26        2.08251   0.00000   0.00000  -0.00001  -0.00001   2.08250
   A27        2.11092  -0.00001   0.00001  -0.00004  -0.00003   2.11089
   A28        2.08974   0.00000  -0.00001   0.00004   0.00004   2.08978
   A29        2.04992  -0.00001  -0.00002   0.00001  -0.00001   2.04991
   A30        2.17307   0.00001   0.00002   0.00000   0.00002   2.17309
   A31        2.06014   0.00000   0.00000  -0.00001  -0.00001   2.06013
   A32        2.11718   0.00000   0.00001   0.00000   0.00001   2.11719
   A33        2.05601   0.00000  -0.00001  -0.00001  -0.00002   2.05599
   A34        2.10999   0.00000   0.00000   0.00000   0.00001   2.11000
   A35        2.09035   0.00000   0.00000   0.00000   0.00000   2.09035
   A36        2.09981   0.00000   0.00000   0.00000  -0.00001   2.09981
   A37        2.09302   0.00000   0.00000   0.00000   0.00000   2.09303
   A38        2.09244   0.00000  -0.00001   0.00000  -0.00001   2.09242
   A39        2.14054   0.00000   0.00001   0.00000   0.00002   2.14056
   A40        2.05020   0.00000   0.00000   0.00000   0.00000   2.05020
   A41        2.08950   0.00000   0.00001   0.00000   0.00001   2.08951
   A42        2.07531   0.00000  -0.00001   0.00000  -0.00001   2.07530
   A43        2.11838   0.00000   0.00000   0.00000  -0.00001   2.11837
   A44        2.11674   0.00000  -0.00001   0.00001   0.00000   2.11674
   A45        2.10592   0.00001   0.00002   0.00001   0.00002   2.10595
   A46        2.06043  -0.00001  -0.00001  -0.00002  -0.00003   2.06041
   A47        1.90595  -0.00001  -0.00002   0.00000  -0.00002   1.90592
   A48        1.90086  -0.00001   0.00004   0.00000   0.00004   1.90090
   A49        1.92297   0.00000   0.00001   0.00002   0.00003   1.92300
   A50        1.90406   0.00000   0.00001   0.00001   0.00002   1.90407
   A51        1.92740   0.00000  -0.00006   0.00000  -0.00005   1.92735
   A52        1.92997   0.00001   0.00004  -0.00003   0.00001   1.92998
   A53        1.87850   0.00000  -0.00004   0.00000  -0.00004   1.87846
   A54        2.10653  -0.00002   0.00003   0.00003   0.00006   2.10659
   A55        2.09678   0.00002  -0.00001  -0.00005  -0.00005   2.09672
   A56        2.07927   0.00000  -0.00002   0.00001  -0.00001   2.07927
   A57        2.10034   0.00000   0.00002  -0.00001   0.00001   2.10035
   A58        2.08290   0.00000   0.00001   0.00000   0.00001   2.08291
   A59        2.09984  -0.00001  -0.00003   0.00001  -0.00001   2.09982
   A60        2.09853   0.00000   0.00000   0.00000   0.00000   2.09853
   A61        2.08981   0.00000  -0.00001  -0.00001  -0.00002   2.08980
   A62        2.09484   0.00000   0.00001   0.00000   0.00002   2.09486
   A63        2.08927   0.00000  -0.00001  -0.00001  -0.00001   2.08926
   A64        2.09687   0.00000   0.00000   0.00002   0.00002   2.09689
   A65        2.09703   0.00000   0.00000  -0.00001  -0.00001   2.09702
   A66        2.09464   0.00000   0.00000   0.00001   0.00001   2.09465
   A67        2.09771   0.00000  -0.00002   0.00001  -0.00001   2.09770
   A68        2.09079   0.00000   0.00001  -0.00002   0.00000   2.09079
   A69        2.10425   0.00000   0.00001  -0.00001   0.00000   2.10425
   A70        2.08866   0.00000  -0.00002   0.00002   0.00000   2.08866
[truncated: 183,376 more chars]
