# Supplementary material for: Substitution effect on chalcone based materials for corrosion and photocrosslinking applications
Source: Royal Society of Chemistry journal article supplement (doi:10.1039/c4ra10884a), 2014-11-19
Supplement: c4ra10884a2.out [file c4ra10884a2.out]

 Entering Link 1 = C:\G03W\l1.exe PID=      5488.
  
 Copyright (c) 1988,1990,1992,1993,1995,1998,2003,2004, Gaussian, Inc.
                  All Rights Reserved.
  
 This is the Gaussian(R) 03 program.  It is based on the
 the Gaussian(R) 98 system (copyright 1998, Gaussian, Inc.),
 the Gaussian(R) 94 system (copyright 1995, Gaussian, Inc.),
 the Gaussian 92(TM) system (copyright 1992, Gaussian, Inc.),
 the Gaussian 90(TM) system (copyright 1990, Gaussian, Inc.),
 the Gaussian 88(TM) system (copyright 1988, Gaussian, Inc.),
 the Gaussian 86(TM) system (copyright 1986, Carnegie Mellon
 University), and the Gaussian 82(TM) system (copyright 1983,
 Carnegie Mellon University). Gaussian is a federally registered
 trademark of Gaussian, Inc.
  
 This software contains proprietary and confidential information,
 including trade secrets, belonging to Gaussian, Inc.
  
 This software is provided under written license and may be
 used, copied, transmitted, or stored only in accord with that
 written license.
  
 The following legend is applicable only to US Government
 contracts under FAR:
  
                    RESTRICTED RIGHTS LEGEND
  
 Use, reproduction and disclosure by the US Government is
 subject to restrictions as set forth in subparagraphs (a)
 and (c) of the Commercial Computer Software - Restricted
 Rights clause in FAR 52.227-19.
  
 Gaussian, Inc.
 340 Quinnipiac St., Bldg. 40, Wallingford CT 06492
  
  
 ---------------------------------------------------------------
 Warning -- This program may not be used in any manner that
 competes with the business of Gaussian, Inc. or will provide
 assistance to any competitor of Gaussian, Inc.  The licensee
 of this program is prohibited from giving any competitor of
 Gaussian, Inc. access to this program.  By using this program,
 the user acknowledges that Gaussian, Inc. is engaged in the
 business of creating and licensing software in the field of
 computational chemistry and represents and warrants to the
 licensee that it is not a competitor of Gaussian, Inc. and that
 it will not use this program in any manner prohibited above.
 ---------------------------------------------------------------
  

 Cite this work as:
 Gaussian 03, Revision C.01,
 M. J. Frisch, G. W. Trucks, H. B. Schlegel, G. E. Scuseria, 
 M. A. Robb, J. R. Cheeseman, J. A. Montgomery, Jr., T. Vreven, 
 K. N. Kudin, J. C. Burant, J. M. Millam, S. S. Iyengar, J. Tomasi, 
 V. Barone, B. Mennucci, M. Cossi, G. Scalmani, N. Rega, 
 G. A. Petersson, H. Nakatsuji, M. Hada, M. Ehara, K. Toyota, 
 R. Fukuda, J. Hasegawa, M. Ishida, T. Nakajima, Y. Honda, O. Kitao, 
 H. Nakai, M. Klene, X. Li, J. E. Knox, H. P. Hratchian, J. B. Cross, 
 C. Adamo, J. Jaramillo, R. Gomperts, R. E. Stratmann, O. Yazyev, 
 A. J. Austin, R. Cammi, C. Pomelli, J. W. Ochterski, P. Y. Ayala, 
 K. Morokuma, G. A. Voth, P. Salvador, J. J. Dannenberg, 
 V. G. Zakrzewski, S. Dapprich, A. D. Daniels, M. C. Strain, 
 O. Farkas, D. K. Malick, A. D. Rabuck, K. Raghavachari, 
 J. B. Foresman, J. V. Ortiz, Q. Cui, A. G. Baboul, S. Clifford, 
 J. Cioslowski, B. B. Stefanov, G. Liu, A. Liashenko, P. Piskorz, 
 I. Komaromi, R. L. Martin, D. J. Fox, T. Keith, M. A. Al-Laham, 
 C. Y. Peng, A. Nanayakkara, M. Challacombe, P. M. W. Gill, 
 B. Johnson, W. Chen, M. W. Wong, C. Gonzalez, and J. A. Pople, 
 Gaussian, Inc., Wallingford CT, 2004.
 
 ******************************************
 Gaussian 03:  IA32W-G03RevC.01  3-Apr-2004
                20-Jun-2013 
 ******************************************
 %chk=Chalcone-2 DFT631Gdp.chk
 Default route:  MaxDisk=2000MB
 ----------------------
 # B3LYP/6-31G(d,p) Opt
 ----------------------
 1/14=-1,18=20,26=3,38=1/1,3;
 2/9=110,17=6,18=5,40=1/2;
 3/5=1,6=6,7=101,11=2,16=1,25=1,30=1,74=-5/1,2,3;
 4//1;
 5/5=2,38=5/2;
 6/7=2,8=2,9=2,10=2,28=1/1;
 7//1,2,3,16;
 1/14=-1,18=20/3(1);
 99//99;
 2/9=110/2;
 3/5=1,6=6,7=101,11=2,16=1,25=1,30=1,74=-5/1,2,3;
 4/5=5,16=3/1;
 5/5=2,38=5/2;
 7//1,2,3,16;
 1/14=-1,18=20/3(-5);
 2/9=110/2;
 6/7=2,8=2,9=2,10=2,19=2,28=1/1;
 99/9=1/99;
 ----------
 CHALCONE 2
 ----------
 Symbolic Z-matrix:
 Charge =  0 Multiplicity = 1
 C
 C                    1    B1
 C                    2    B2       1    A1
 C                    3    B3       2    A2       1    D1       0
 C                    4    B4       3    A3       2    D2       0
 C                    5    B5       4    A4       3    D3       0
 O                    3    B6       2    A5       1    D4       0
 C                    6    B7       5    A6       4    D5       0
 C                    8    B8       6    A7       5    D6       0
 C                    9    B9       8    A8       6    D7       0
 C                    10   B10      9    A9       8    D8       0
 C                    11   B11      10   A10      9    D9       0
 C                    12   B12      11   A11      10   D10      0
 C                    13   B13      12   A12      11   D11      0
 C                    14   B14      13   A13      12   D12      0
 C                    15   B15      14   A14      13   D13      0
 O                    14   B16      13   A15      12   D14      0
 C                    7    B17      3    A16      2    D15      0
 C                    18   B18      7    A17      3    D16      0
 C                    19   B19      18   A18      7    D17      0
 C                    20   B20      19   A19      18   D18      0
 C                    21   B21      20   A20      19   D19      0
 C                    22   B22      21   A21      20   D20      0
 C                    19   B23      18   A22      7    D21      0
 O                    10   B24      9    A23      8    D22      0
 C                    17   B25      14   A24      13   D23      0
 C                    26   B26      17   A25      14   D24      0
 C                    27   B27      26   A26      17   D25      0
 C                    28   B28      27   A27      26   D26      0
 C                    29   B29      28   A28      27   D27      0
 C                    30   B30      29   A29      28   D28      0
 C                    31   B31      30   A30      29   D29      0
 H                    1    B32      2    A31      3    D30      0
 H                    2    B33      1    A32      6    D31      0
 H                    4    B34      3    A33      2    D32      0
 H                    5    B35      4    A34      3    D33      0
 H                    8    B36      6    A35      5    D34      0
 H                    9    B37      8    A36      6    D35      0
 H                    12   B38      11   A37      10   D36      0
 H                    13   B39      12   A38      11   D37      0
 H                    15   B40      14   A39      13   D38      0
 H                    16   B41      15   A40      14   D39      0
 H                    18   B42      7    A41      3    D40      0
 H                    18   B43      7    A42      3    D41      0
 H                    20   B44      19   A43      18   D42      0
 H                    21   B45      20   A44      19   D43      0
 H                    22   B46      21   A45      20   D44      0
 H                    23   B47      22   A46      21   D45      0
 H                    24   B48      19   A47      18   D46      0
 H                    26   B49      17   A48      14   D47      0
 H                    26   B50      17   A49      14   D48      0
 H                    28   B51      27   A50      26   D49      0
 H                    29   B52      28   A51      27   D50      0
 H                    30   B53      29   A52      28   D51      0
 H                    31   B54      30   A53      29   D52      0
 H                    32   B55      31   A54      30   D53      0
       Variables:
  B1                    1.37135                  
  B2                    1.39732                  
  B3                    1.38409                  
  B4                    1.38911                  
  B5                    1.38603                  
  B6                    1.34486                  
  B7                    1.46893                  
  B8                    1.32963                  
  B9                    1.48685                  
  B10                   1.49561                  
  B11                   1.38828                  
  B12                   1.38397                  
  B13                   1.3894                   
  B14                   1.39283                  
  B15                   1.37628                  
  B16                   1.34391                  
  B17                   1.40634                  
  B18                   1.50859                  
  B19                   1.39081                  
  B20                   1.38244                  
  B21                   1.38761                  
  B22                   1.38254                  
  B23                   1.38593                  
  B24                   1.20256                  
  B25                   1.40686                  
  B26                   1.50865                  
  B27                   1.38597                  
  B28                   1.38734                  
  B29                   1.38256                  
  B30                   1.38758                  
  B31                   1.38247                  
  B32                   1.07452                  
  B33                   1.07422                  
  B34                   1.07238                  
  B35                   1.07618                  
  B36                   1.07674                  
  B37                   1.07242                  
  B38                   1.07352                  
  B39                   1.0724                   
  B40                   1.07404                  
  B41                   1.07385                  
  B42                   1.08739                  
  B43                   1.08547                  
  B44                   1.07481                  
  B45                   1.07581                  
  B46                   1.07568                  
  B47                   1.07572                  
  B48                   1.07676                  
  B49                   1.08718                  
  B50                   1.0853                   
  B51                   1.07677                  
  B52                   1.07573                  
  B53                   1.0757                   
  B54                   1.07583                  
  B55                   1.07478                  
  A1                  120.34307                  
  A2                  119.48823                  
  A3                  119.32998                  
  A4                  122.15637                  
  A5                  115.59508                  
  A6                  118.91599                  
  A7                  128.05479                  
  A8                  119.79346                  
  A9                  119.02815                  
  A10                 118.02305                  
  A11                 121.72249                  
  A12                 119.40761                  
  A13                 119.66954                  
  A14                 120.12403                  
  A15                 124.61161                  
  A16                 120.09628                  
  A17                 108.99463                  
  A18                 120.65671                  
  A19                 120.3745                   
  A20                 120.263                    
  A21                 119.65492                  
  A22                 120.24446                  
  A23                 121.06766                  
  A24                 120.2561                   
  A25                 108.95985                  
  A26                 120.222                    
  A27                 120.62594                  
  A28                 120.01935                  
  A29                 119.65106                  
  A30                 120.26717                  
  A31                 118.57481                  
  A32                 121.2521                   
  A33                 121.46461                  
  A34                 118.53781                  
  A35                 115.56562                  
  A36                 121.52582                  
  A37                 118.46825                  
  A38                 119.27732                  
  A39                 118.57968                  
  A40                 118.17034                  
  A41                 109.44481                  
  A42                 110.11393                  
  A43                 119.54583                  
  A44                 119.75118                  
  A45                 120.14355                  
  A46                 120.19322                  
  A47                 119.87853                  
  A48                 109.46003                  
  A49                 110.12641                  
  A50                 119.87442                  
  A51                 119.78546                  
  A52                 120.20259                  
  A53                 119.9853                   
  A54                 120.07962                  
  D1                   -0.01849                  
  D2                    0.08997                  
  D3                   -0.17914                  
  D4                 -179.91826                  
  D5                 -179.89182                  
  D6                  177.10237                  
  D7                  179.25811                  
  D8                  172.65696                  
  D9                  165.03848                  
  D10                 179.65366                  
  D11                  -0.7774                   
  D12                   0.13018                  
  D13                   0.45195                  
  D14                -179.93166                  
  D15                -178.44822                  
  D16                 177.60996                  
  D17                 -45.30508                  
  D18                -177.90897                  
  D19                   0.29845                  
  D20                  -0.23319                  
  D21                 136.83885                  
  D22                  -8.17911                  
  D23                   1.97072                  
  D24                 177.46138                  
  D25                 137.17625                  
  D26                 177.55448                  
  D27                   0.37442                  
  D28                  -0.10157                  
  D29                  -0.23164                  
  D30                -179.74131                  
  D31                 179.9979                   
  D32                -179.88306                  
  D33                 179.91051                  
  D34                  -2.73992                  
  D35                   0.41467                  
  D36                  -0.46903                  
  D37                 179.2965                   
  D38                -179.48133                  
  D39                -179.07229                  
  D40                  57.09166                  
  D41                 -61.46726                  
  D42                   2.73712                  
  D43                -179.74709                  
  D44                 179.9737                   
  D45                -179.63758                  
  D46                  -2.70309                  
  D47                  56.95691                  
  D48                 -61.64229                  
  D49                  -2.72438                  
  D50                 179.91494                  
  D51                 179.69274                  
  D52                 179.81492                  
  D53                 179.64915                  
 

 GradGradGradGradGradGradGradGradGradGradGradGradGradGradGradGradGradGrad
 Berny optimization.
 Initialization pass.
                           ----------------------------
                           !    Initial Parameters    !
                           ! (Angstroms and Degrees)  !
 --------------------------                            --------------------------
 ! Name  Definition              Value          Derivative Info.                !
 --------------------------------------------------------------------------------
 ! R1    R(1,2)                  1.3713         estimate D2E/DX2                !
 ! R2    R(1,6)                  1.4018         estimate D2E/DX2                !
 ! R3    R(1,33)                 1.0745         estimate D2E/DX2                !
 ! R4    R(2,3)                  1.3973         estimate D2E/DX2                !
 ! R5    R(2,34)                 1.0742         estimate D2E/DX2                !
 ! R6    R(3,4)                  1.3841         estimate D2E/DX2                !
 ! R7    R(3,7)                  1.3449         estimate D2E/DX2                !
 ! R8    R(4,5)                  1.3891         estimate D2E/DX2                !
 ! R9    R(4,35)                 1.0724         estimate D2E/DX2                !
 ! R10   R(5,6)                  1.386          estimate D2E/DX2                !
 ! R11   R(5,36)                 1.0762         estimate D2E/DX2                !
 ! R12   R(6,8)                  1.4689         estimate D2E/DX2                !
 ! R13   R(7,18)                 1.4063         estimate D2E/DX2                !
 ! R14   R(8,9)                  1.3296         estimate D2E/DX2                !
 ! R15   R(8,37)                 1.0767         estimate D2E/DX2                !
 ! R16   R(9,10)                 1.4868         estimate D2E/DX2                !
 ! R17   R(9,38)                 1.0724         estimate D2E/DX2                !
 ! R18   R(10,11)                1.4956         estimate D2E/DX2                !
 ! R19   R(10,25)                1.2026         estimate D2E/DX2                !
 ! R20   R(11,12)                1.3883         estimate D2E/DX2                !
 ! R21   R(11,16)                1.396          estimate D2E/DX2                !
 ! R22   R(12,13)                1.384          estimate D2E/DX2                !
 ! R23   R(12,39)                1.0735         estimate D2E/DX2                !
 ! R24   R(13,14)                1.3894         estimate D2E/DX2                !
 ! R25   R(13,40)                1.0724         estimate D2E/DX2                !
 ! R26   R(14,15)                1.3928         estimate D2E/DX2                !
 ! R27   R(14,17)                1.3439         estimate D2E/DX2                !
 ! R28   R(15,16)                1.3763         estimate D2E/DX2                !
 ! R29   R(15,41)                1.074          estimate D2E/DX2                !
 ! R30   R(16,42)                1.0739         estimate D2E/DX2                !
 ! R31   R(17,26)                1.4069         estimate D2E/DX2                !
 ! R32   R(18,19)                1.5086         estimate D2E/DX2                !
 ! R33   R(18,43)                1.0874         estimate D2E/DX2                !
 ! R34   R(18,44)                1.0855         estimate D2E/DX2                !
 ! R35   R(19,20)                1.3908         estimate D2E/DX2                !
 ! R36   R(19,24)                1.3859         estimate D2E/DX2                !
 ! R37   R(20,21)                1.3824         estimate D2E/DX2                !
 ! R38   R(20,45)                1.0748         estimate D2E/DX2                !
 ! R39   R(21,22)                1.3876         estimate D2E/DX2                !
 ! R40   R(21,46)                1.0758         estimate D2E/DX2                !
 ! R41   R(22,23)                1.3825         estimate D2E/DX2                !
 ! R42   R(22,47)                1.0757         estimate D2E/DX2                !
 ! R43   R(23,24)                1.3874         estimate D2E/DX2                !
 ! R44   R(23,48)                1.0757         estimate D2E/DX2                !
 ! R45   R(24,49)                1.0768         estimate D2E/DX2                !
 ! R46   R(26,27)                1.5087         estimate D2E/DX2                !
 ! R47   R(26,50)                1.0872         estimate D2E/DX2                !
 ! R48   R(26,51)                1.0853         estimate D2E/DX2                !
 ! R49   R(27,28)                1.386          estimate D2E/DX2                !
 ! R50   R(27,32)                1.3908         estimate D2E/DX2                !
 ! R51   R(28,29)                1.3873         estimate D2E/DX2                !
 ! R52   R(28,52)                1.0768         estimate D2E/DX2                !
 ! R53   R(29,30)                1.3826         estimate D2E/DX2                !
 ! R54   R(29,53)                1.0757         estimate D2E/DX2                !
 ! R55   R(30,31)                1.3876         estimate D2E/DX2                !
 ! R56   R(30,54)                1.0757         estimate D2E/DX2                !
 ! R57   R(31,32)                1.3825         estimate D2E/DX2                !
 ! R58   R(31,55)                1.0758         estimate D2E/DX2                !
 ! R59   R(32,56)                1.0748         estimate D2E/DX2                !
 ! A1    A(2,1,6)              121.2745         estimate D2E/DX2                !
 ! A2    A(2,1,33)             118.5748         estimate D2E/DX2                !
 ! A3    A(6,1,33)             120.1503         estimate D2E/DX2                !
 ! A4    A(1,2,3)              120.3431         estimate D2E/DX2                !
 ! A5    A(1,2,34)             121.2521         estimate D2E/DX2                !
 ! A6    A(3,2,34)             118.4048         estimate D2E/DX2                !
 ! A7    A(2,3,4)              119.4882         estimate D2E/DX2                !
 ! A8    A(2,3,7)              115.5951         estimate D2E/DX2                !
 ! A9    A(4,3,7)              124.9166         estimate D2E/DX2                !
 ! A10   A(3,4,5)              119.33           estimate D2E/DX2                !
 ! A11   A(3,4,35)             121.4646         estimate D2E/DX2                !
 ! A12   A(5,4,35)             119.2054         estimate D2E/DX2                !
 ! A13   A(4,5,6)              122.1564         estimate D2E/DX2                !
 ! A14   A(4,5,36)             118.5378         estimate D2E/DX2                !
 ! A15   A(6,5,36)             119.3058         estimate D2E/DX2                !
 ! A16   A(1,6,5)              117.4076         estimate D2E/DX2                !
 ! A17   A(1,6,8)              123.6763         estimate D2E/DX2                !
 ! A18   A(5,6,8)              118.916          estimate D2E/DX2                !
 ! A19   A(3,7,18)             120.0963         estimate D2E/DX2                !
 ! A20   A(6,8,9)              128.0548         estimate D2E/DX2                !
 ! A21   A(6,8,37)             115.5656         estimate D2E/DX2                !
 ! A22   A(9,8,37)             116.3794         estimate D2E/DX2                !
 ! A23   A(8,9,10)             119.7935         estimate D2E/DX2                !
 ! A24   A(8,9,38)             121.5258         estimate D2E/DX2                !
 ! A25   A(10,9,38)            118.6709         estimate D2E/DX2                !
 ! A26   A(9,10,11)            119.0281         estimate D2E/DX2                !
 ! A27   A(9,10,25)            121.0677         estimate D2E/DX2                !
 ! A28   A(11,10,25)           119.8989         estimate D2E/DX2                !
 ! A29   A(10,11,12)           118.0231         estimate D2E/DX2                !
 ! A30   A(10,11,16)           123.9937         estimate D2E/DX2                !
 ! A31   A(12,11,16)           117.9722         estimate D2E/DX2                !
 ! A32   A(11,12,13)           121.7225         estimate D2E/DX2                !
 ! A33   A(11,12,39)           118.4683         estimate D2E/DX2                !
 ! A34   A(13,12,39)           119.8091         estimate D2E/DX2                !
 ! A35   A(12,13,14)           119.4076         estimate D2E/DX2                !
 ! A36   A(12,13,40)           119.2773         estimate D2E/DX2                !
 ! A37   A(14,13,40)           121.315          estimate D2E/DX2                !
 ! A38   A(13,14,15)           119.6695         estimate D2E/DX2                !
 ! A39   A(13,14,17)           124.6116         estimate D2E/DX2                !
 ! A40   A(15,14,17)           115.7188         estimate D2E/DX2                !
 ! A41   A(14,15,16)           120.124          estimate D2E/DX2                !
 ! A42   A(14,15,41)           118.5797         estimate D2E/DX2                !
 ! A43   A(16,15,41)           121.2963         estimate D2E/DX2                !
 ! A44   A(11,16,15)           121.098          estimate D2E/DX2                !
 ! A45   A(11,16,42)           120.718          estimate D2E/DX2                !
 ! A46   A(15,16,42)           118.1703         estimate D2E/DX2                !
 ! A47   A(14,17,26)           120.2561         estimate D2E/DX2                !
 ! A48   A(7,18,19)            108.9946         estimate D2E/DX2                !
 ! A49   A(7,18,43)            109.4448         estimate D2E/DX2                !
 ! A50   A(7,18,44)            110.1139         estimate D2E/DX2                !
 ! A51   A(19,18,43)           110.1466         estimate D2E/DX2                !
 ! A52   A(19,18,44)           110.1414         estimate D2E/DX2                !
 ! A53   A(43,18,44)           107.9882         estimate D2E/DX2                !
 ! A54   A(18,19,20)           120.6567         estimate D2E/DX2                !
 ! A55   A(18,19,24)           120.2445         estimate D2E/DX2                !
 ! A56   A(20,19,24)           119.0647         estimate D2E/DX2                !
 ! A57   A(19,20,21)           120.3745         estimate D2E/DX2                !
 ! A58   A(19,20,45)           119.5458         estimate D2E/DX2                !
 ! A59   A(21,20,45)           120.0765         estimate D2E/DX2                !
 ! A60   A(20,21,22)           120.263          estimate D2E/DX2                !
 ! A61   A(20,21,46)           119.7512         estimate D2E/DX2                !
 ! A62   A(22,21,46)           119.9858         estimate D2E/DX2                !
 ! A63   A(21,22,23)           119.6549         estimate D2E/DX2                !
 ! A64   A(21,22,47)           120.1436         estimate D2E/DX2                !
 ! A65   A(23,22,47)           120.2012         estimate D2E/DX2                !
 ! A66   A(22,23,24)           120.0186         estimate D2E/DX2                !
 ! A67   A(22,23,48)           120.1932         estimate D2E/DX2                !
 ! A68   A(24,23,48)           119.7866         estimate D2E/DX2                !
 ! A69   A(19,24,23)           120.6228         estimate D2E/DX2                !
 ! A70   A(19,24,49)           119.8785         estimate D2E/DX2                !
 ! A71   A(23,24,49)           119.498          estimate D2E/DX2                !
 ! A72   A(17,26,27)           108.9598         estimate D2E/DX2                !
 ! A73   A(17,26,50)           109.46           estimate D2E/DX2                !
 ! A74   A(17,26,51)           110.1264         estimate D2E/DX2                !
 ! A75   A(27,26,50)           110.1452         estimate D2E/DX2                !
 ! A76   A(27,26,51)           110.1315         estimate D2E/DX2                !
 ! A77   A(50,26,51)           108.0074         estimate D2E/DX2                !
 ! A78   A(26,27,28)           120.222          estimate D2E/DX2                !
 ! A79   A(26,27,32)           120.6818         estimate D2E/DX2                !
 ! A80   A(28,27,32)           119.0612         estimate D2E/DX2                !
 ! A81   A(27,28,29)           120.6259         estimate D2E/DX2                !
 ! A82   A(27,28,52)           119.8744         estimate D2E/DX2                !
 ! A83   A(29,28,52)           119.4991         estimate D2E/DX2                !
 ! A84   A(28,29,30)           120.0193         estimate D2E/DX2                !
 ! A85   A(28,29,53)           119.7855         estimate D2E/DX2                !
 ! A86   A(30,29,53)           120.1936         estimate D2E/DX2                !
 ! A87   A(29,30,31)           119.6511         estimate D2E/DX2                !
 ! A88   A(29,30,54)           120.2026         estimate D2E/DX2                !
 ! A89   A(31,30,54)           120.146          estimate D2E/DX2                !
 ! A90   A(30,31,32)           120.2672         estimate D2E/DX2                !
 ! A91   A(30,31,55)           119.9853         estimate D2E/DX2                !
 ! A92   A(32,31,55)           119.7475         estimate D2E/DX2                !
 ! A93   A(27,32,31)           120.3739         estimate D2E/DX2                !
 ! A94   A(27,32,56)           119.5434         estimate D2E/DX2                !
 ! A95   A(31,32,56)           120.0796         estimate D2E/DX2                !
 ! D1    D(6,1,2,3)              0.0303         estimate D2E/DX2                !
 ! D2    D(6,1,2,34)           179.9979         estimate D2E/DX2                !
 ! D3    D(33,1,2,3)          -179.7413         estimate D2E/DX2                !
 ! D4    D(33,1,2,34)            0.2263         estimate D2E/DX2                !
 ! D5    D(2,1,6,5)             -0.1113         estimate D2E/DX2                !
 ! D6    D(2,1,6,8)            179.9714         estimate D2E/DX2                !
 ! D7    D(33,1,6,5)           179.6568         estimate D2E/DX2                !
 ! D8    D(33,1,6,8)            -0.2605         estimate D2E/DX2                !
 ! D9    D(1,2,3,4)             -0.0185         estimate D2E/DX2                !
 ! D10   D(1,2,3,7)           -179.9183         estimate D2E/DX2                !
 ! D11   D(34,2,3,4)          -179.987          estimate D2E/DX2                !
 ! D12   D(34,2,3,7)             0.1133         estimate D2E/DX2                !
 ! D13   D(2,3,4,5)              0.09           estimate D2E/DX2                !
 ! D14   D(2,3,4,35)          -179.8831         estimate D2E/DX2                !
 ! D15   D(7,3,4,5)            179.9797         estimate D2E/DX2                !
 ! D16   D(7,3,4,35)             0.0067         estimate D2E/DX2                !
 ! D17   D(2,3,7,18)          -178.4482         estimate D2E/DX2                !
 ! D18   D(4,3,7,18)             1.6582         estimate D2E/DX2                !
 ! D19   D(3,4,5,6)             -0.1791         estimate D2E/DX2                !
 ! D20   D(3,4,5,36)           179.9105         estimate D2E/DX2                !
 ! D21   D(35,4,5,6)           179.7945         estimate D2E/DX2                !
 ! D22   D(35,4,5,36)           -0.1158         estimate D2E/DX2                !
 ! D23   D(4,5,6,1)              0.1868         estimate D2E/DX2                !
 ! D24   D(4,5,6,8)           -179.8918         estimate D2E/DX2                !
 ! D25   D(36,5,6,1)          -179.9035         estimate D2E/DX2                !
 ! D26   D(36,5,6,8)             0.0179         estimate D2E/DX2                !
 ! D27   D(1,6,8,9)             -2.9815         estimate D2E/DX2                !
 ! D28   D(1,6,8,37)           177.1762         estimate D2E/DX2                !
 ! D29   D(5,6,8,9)            177.1024         estimate D2E/DX2                !
 ! D30   D(5,6,8,37)            -2.7399         estimate D2E/DX2                !
 ! D31   D(3,7,18,19)          177.61           estimate D2E/DX2                !
 ! D32   D(3,7,18,43)           57.0917         estimate D2E/DX2                !
 ! D33   D(3,7,18,44)          -61.4673         estimate D2E/DX2                !
 ! D34   D(6,8,9,10)           179.2581         estimate D2E/DX2                !
 ! D35   D(6,8,9,38)             0.4147         estimate D2E/DX2                !
 ! D36   D(37,8,9,10)           -0.9007         estimate D2E/DX2                !
 ! D37   D(37,8,9,38)         -179.7441         estimate D2E/DX2                !
 ! D38   D(8,9,10,11)          172.657          estimate D2E/DX2                !
 ! D39   D(8,9,10,25)           -8.1791         estimate D2E/DX2                !
 ! D40   D(38,9,10,11)          -8.4667         estimate D2E/DX2                !
 ! D41   D(38,9,10,25)         170.6973         estimate D2E/DX2                !
 ! D42   D(9,10,11,12)         165.0385         estimate D2E/DX2                !
 ! D43   D(9,10,11,16)         -16.1984         estimate D2E/DX2                !
 ! D44   D(25,10,11,12)        -14.1354         estimate D2E/DX2                !
 ! D45   D(25,10,11,16)        164.6277         estimate D2E/DX2                !
 ! D46   D(10,11,12,13)        179.6537         estimate D2E/DX2                !
 ! D47   D(10,11,12,39)         -0.469          estimate D2E/DX2                !
 ! D48   D(16,11,12,13)          0.8148         estimate D2E/DX2                !
 ! D49   D(16,11,12,39)       -179.3079         estimate D2E/DX2                !
 ! D50   D(10,11,16,15)       -178.9794         estimate D2E/DX2                !
 ! D51   D(10,11,16,42)         -0.3495         estimate D2E/DX2                !
 ! D52   D(12,11,16,15)         -0.2157         estimate D2E/DX2                !
 ! D53   D(12,11,16,42)        178.4141         estimate D2E/DX2                !
 ! D54   D(11,12,13,14)         -0.7774         estimate D2E/DX2                !
 ! D55   D(11,12,13,40)        179.2965         estimate D2E/DX2                !
 ! D56   D(39,12,13,14)        179.3469         estimate D2E/DX2                !
 ! D57   D(39,12,13,40)         -0.5792         estimate D2E/DX2                !
 ! D58   D(12,13,14,15)          0.1302         estimate D2E/DX2                !
 ! D59   D(12,13,14,17)       -179.9317         estimate D2E/DX2                !
 ! D60   D(40,13,14,15)       -179.9453         estimate D2E/DX2                !
 ! D61   D(40,13,14,17)         -0.0071         estimate D2E/DX2                !
 ! D62   D(13,14,15,16)          0.452          estimate D2E/DX2                !
 ! D63   D(13,14,15,41)       -179.4813         estimate D2E/DX2                !
 ! D64   D(17,14,15,16)       -179.4916         estimate D2E/DX2                !
 ! D65   D(17,14,15,41)          0.5752         estimate D2E/DX2                !
 ! D66   D(13,14,17,26)          1.9707         estimate D2E/DX2                !
 ! D67   D(15,14,17,26)       -178.0889         estimate D2E/DX2                !
 ! D68   D(14,15,16,11)         -0.4084         estimate D2E/DX2                !
 ! D69   D(14,15,16,42)       -179.0723         estimate D2E/DX2                !
 ! D70   D(41,15,16,11)        179.523          estimate D2E/DX2                !
 ! D71   D(41,15,16,42)          0.8591         estimate D2E/DX2                !
 ! D72   D(14,17,26,27)        177.4614         estimate D2E/DX2                !
 ! D73   D(14,17,26,50)         56.9569         estimate D2E/DX2                !
 ! D74   D(14,17,26,51)        -61.6423         estimate D2E/DX2                !
 ! D75   D(7,18,19,20)         -45.3051         estimate D2E/DX2                !
 ! D76   D(7,18,19,24)         136.8389         estimate D2E/DX2                !
 ! D77   D(43,18,19,20)         74.781          estimate D2E/DX2                !
 ! D78   D(43,18,19,24)       -103.0751         estimate D2E/DX2                !
 ! D79   D(44,18,19,20)       -166.2111         estimate D2E/DX2                !
 ! D80   D(44,18,19,24)         15.9329         estimate D2E/DX2                !
 ! D81   D(18,19,20,21)       -177.909          estimate D2E/DX2                !
 ! D82   D(18,19,20,45)          2.7371         estimate D2E/DX2                !
 ! D83   D(24,19,20,21)         -0.0279         estimate D2E/DX2                !
 ! D84   D(24,19,20,45)       -179.3818         estimate D2E/DX2                !
 ! D85   D(18,19,24,23)        177.5823         estimate D2E/DX2                !
 ! D86   D(18,19,24,49)         -2.7031         estimate D2E/DX2                !
 ! D87   D(20,19,24,23)         -0.3077         estimate D2E/DX2                !
 ! D88   D(20,19,24,49)        179.4069         estimate D2E/DX2                !
 ! D89   D(19,20,21,22)          0.2984         estimate D2E/DX2                !
 ! D90   D(19,20,21,46)       -179.7471         estimate D2E/DX2                !
 ! D91   D(45,20,21,22)        179.6489         estimate D2E/DX2                !
 ! D92   D(45,20,21,46)         -0.3966         estimate D2E/DX2                !
 ! D93   D(20,21,22,23)         -0.2332         estimate D2E/DX2                !
 ! D94   D(20,21,22,47)        179.9737         estimate D2E/DX2                !
 ! D95   D(46,21,22,23)        179.8125         estimate D2E/DX2                !
 ! D96   D(46,21,22,47)          0.0193         estimate D2E/DX2                !
 ! D97   D(21,22,23,24)         -0.1008         estimate D2E/DX2                !
 ! D98   D(21,22,23,48)       -179.6376         estimate D2E/DX2                !
 ! D99   D(47,22,23,24)        179.6922         estimate D2E/DX2                !
 ! D100  D(47,22,23,48)          0.1554         estimate D2E/DX2                !
 ! D101  D(22,23,24,19)          0.3738         estimate D2E/DX2                !
 ! D102  D(22,23,24,49)       -179.3419         estimate D2E/DX2                !
 ! D103  D(48,23,24,19)        179.9125         estimate D2E/DX2                !
 ! D104  D(48,23,24,49)          0.1968         estimate D2E/DX2                !
 ! D105  D(17,26,27,28)        137.1762         estimate D2E/DX2                !
 ! D106  D(17,26,27,32)        -44.9954         estimate D2E/DX2                !
 ! D107  D(50,26,27,28)       -102.7416         estimate D2E/DX2                !
 ! D108  D(50,26,27,32)         75.0868         estimate D2E/DX2                !
 ! D109  D(51,26,27,28)         16.283          estimate D2E/DX2                !
 ! D110  D(51,26,27,32)       -165.8886         estimate D2E/DX2                !
 ! D111  D(26,27,28,29)        177.5545         estimate D2E/DX2                !
 ! D112  D(26,27,28,52)         -2.7244         estimate D2E/DX2                !
 ! D113  D(32,27,28,29)         -0.3089         estimate D2E/DX2                !
 ! D114  D(32,27,28,52)        179.4122         estimate D2E/DX2                !
 ! D115  D(26,27,32,31)       -177.8792         estimate D2E/DX2                !
 ! D116  D(26,27,32,56)          2.7645         estimate D2E/DX2                !
 ! D117  D(28,27,32,31)         -0.0259         estimate D2E/DX2                !
 ! D118  D(28,27,32,56)       -179.3822         estimate D2E/DX2                !
 ! D119  D(27,28,29,30)          0.3744         estimate D2E/DX2                !
 ! D120  D(27,28,29,53)        179.9149         estimate D2E/DX2                !
 ! D121  D(52,28,29,30)       -179.3478         estimate D2E/DX2                !
 ! D122  D(52,28,29,53)          0.1928         estimate D2E/DX2                !
 ! D123  D(28,29,30,31)         -0.1016         estimate D2E/DX2                !
 ! D124  D(28,29,30,54)        179.6927         estimate D2E/DX2                !
 ! D125  D(53,29,30,31)       -179.6402         estimate D2E/DX2                !
 ! D126  D(53,29,30,54)          0.1541         estimate D2E/DX2                !
 ! D127  D(29,30,31,32)         -0.2316         estimate D2E/DX2                !
 ! D128  D(29,30,31,55)        179.8149         estimate D2E/DX2                !
 ! D129  D(54,30,31,32)        179.9739         estimate D2E/DX2                !
 ! D130  D(54,30,31,55)          0.0205         estimate D2E/DX2                !
 ! D131  D(30,31,32,27)          0.2963         estimate D2E/DX2                !
 ! D132  D(30,31,32,56)        179.6491         estimate D2E/DX2                !
 ! D133  D(55,31,32,27)       -179.7501         estimate D2E/DX2                !
 ! D134  D(55,31,32,56)         -0.3973         estimate D2E/DX2                !
 --------------------------------------------------------------------------------
 Trust Radius=3.00D-01 FncErr=1.00D-07 GrdErr=1.00D-06
 Number of steps in this run= 298 maximum allowed number of steps= 336.
 GradGradGradGradGradGradGradGradGradGradGradGradGradGradGradGradGradGrad

 Stoichiometry    C29H24O3
 Framework group  C1[X(C29H24O3)]
 Deg. of freedom   162
 Full point group                 C1      NOp   1
 Largest Abelian subgroup         C1      NOp   1
 Largest concise Abelian subgroup C1      NOp   1
                         Standard orientation:                         
 ---------------------------------------------------------------------
 Center     Atomic     Atomic              Coordinates (Angstroms)
 Number     Number      Type              X           Y           Z
 ---------------------------------------------------------------------
    1          6             0        2.767338   -0.097769    0.189670
    2          6             0        4.033574   -0.624231    0.198143
    3          6             0        5.140659    0.196031   -0.034323
    4          6             0        4.950159    1.545837   -0.274004
    5          6             0        3.660087    2.060941   -0.277104
    6          6             0        2.547690    1.265691   -0.050744
    7          8             0        6.336032   -0.419545   -0.005877
    8          6             0        1.215738    1.884709   -0.072532
    9          6             0        0.033932    1.291622    0.067062
   10          6             0       -1.209922    2.105394    0.030811
   11          6             0       -2.533170    1.408414    0.022570
   12          6             0       -3.666903    2.157885    0.305872
   13          6             0       -4.930117    1.592542    0.312251
   14          6             0       -5.075381    0.243652    0.012538
   15          6             0       -3.950479   -0.521071   -0.287072
   16          6             0       -2.700735    0.055274   -0.276908
   17          8             0       -6.249032   -0.410544   -0.013071
   18          6             0        7.515844    0.322043   -0.195339
   19          6             0        8.702437   -0.599169   -0.056735
   20          6             0        8.771894   -1.513733    0.988776
   21          6             0        9.881488   -2.325225    1.135100
   22          6             0       10.939899   -2.230237    0.242792
   23          6             0       10.877800   -1.322275   -0.797962
   24          6             0        9.760619   -0.513374   -0.947626
   25          8             0       -1.165317    3.307104    0.023261
   26          6             0       -7.450209    0.278468    0.235303
   27          6             0       -8.605537   -0.679504    0.081902
   28          6             0       -9.648042   -0.667115    0.995107
   29          6             0      -10.738723   -1.509259    0.834066
   30          6             0      -10.789635   -2.377246   -0.240872
   31          6             0       -9.746663   -2.398748   -1.155818
   32          6             0       -8.663649   -1.554138   -0.997874
   33          1             0        1.936813   -0.753587    0.375989
   34          1             0        4.201481   -1.669115    0.382448
   35          1             0        5.776744    2.203793   -0.458014
   36          1             0        3.526784    3.112461   -0.463409
   37          1             0        1.201213    2.950802   -0.222853
   38          1             0       -0.047558    0.234005    0.224826
   39          1             0       -3.548333    3.201841    0.526190
   40          1             0       -5.777907    2.205671    0.547558
   41          1             0       -4.083823   -1.560036   -0.524433
   42          1             0       -1.856807   -0.559687   -0.527448
   43          1             0        7.568340    1.114706    0.547189
   44          1             0        7.513269    0.782953   -1.178094
   45          1             0        7.951338   -1.593756    1.678342
   46          1             0        9.922893   -3.032016    1.945104
   47          1             0       11.802533   -2.862314    0.358704
   48          1             0       11.690837   -1.245473   -1.498134
   49          1             0        9.716499    0.183368   -1.767398
   50          1             0       -7.548926    1.100090   -0.469793
   51          1             0       -7.441231    0.695451    1.237261
   52          1             0       -9.612120   -0.001947    1.841092
   53          1             0      -11.539749   -1.489405    1.551808
   54          1             0      -11.631578   -3.034988   -0.365886
   55          1             0       -9.779325   -3.074124   -1.992599
   56          1             0       -7.854806   -1.577279   -1.705259
 ---------------------------------------------------------------------
 Rotational constants (GHZ):      0.4476296      0.0248891      0.0238769
 Standard basis: 6-31G(d,p) (6D, 7F)
 There are   600 symmetry adapted basis functions of A   symmetry.
 Integral buffers will be    262144 words long.
 Raffenetti 2 integral format.
 Two-electron integral symmetry is turned on.
   600 basis functions,  1064 primitive gaussians,   600 cartesian basis functions
   111 alpha electrons      111 beta electrons
       nuclear repulsion energy      2518.7750522299 Hartrees.
 NAtoms=   56 NActive=   56 NUniq=   56 SFac= 1.00D+00 NAtFMM=   60 Big=F
 One-electron integrals computed using PRISM.
 NBasis=   600 RedAO= T  NBF=   600
 NBsUse=   600 1.00D-06 NBFU=   600
 Harris functional with IExCor=  402 diagonalized for initial guess.
 ExpMin= 1.61D-01 ExpMax= 5.48D+03 ExpMxC= 8.25D+02 IAcc=1 IRadAn=         1 AccDes= 1.00D-06
 HarFok:  IExCor= 402 AccDes= 1.00D-06 IRadAn=         1 IDoV=1
 ScaDFX=  1.000000  1.000000  1.000000  1.000000
 Initial guess orbital symmetries:
       Occupied  (A) (A) (A) (A) (A) (A) (A) (A) (A) (A) (A) (A)
                 (A) (A) (A) (A) (A) (A) (A) (A) (A) (A) (A) (A)
                 (A) (A) (A) (A) (A) (A) (A) (A) (A) (A) (A) (A)
                 (A) (A) (A) (A) (A) (A) (A) (A) (A) (A) (A) (A)
                 (A) (A) (A) (A) (A) (A) (A) (A) (A) (A) (A) (A)
                 (A) (A) (A) (A) (A) (A) (A) (A) (A) (A) (A) (A)
                 (A) (A) (A) (A) (A) (A) (A) (A) (A) (A) (A) (A)
                 (A) (A) (A) (A) (A) (A) (A) (A) (A) (A) (A) (A)
                 (A) (A) (A) (A) (A) (A) (A) (A) (A) (A) (A) (A)
                 (A) (A) (A)
       Virtual   (A) (A) (A) (A) (A) (A) (A) (A) (A) (A) (A) (A)
                 (A) (A) (A) (A) (A) (A) (A) (A) (A) (A) (A) (A)
                 (A) (A) (A) (A) (A) (A) (A) (A) (A) (A) (A) (A)
                 (A) (A) (A) (A) (A) (A) (A) (A) (A) (A) (A) (A)
                 (A) (A) (A) (A) (A) (A) (A) (A) (A) (A) (A) (A)
                 (A) (A) (A) (A) (A) (A) (A) (A) (A) (A) (A) (A)
                 (A) (A) (A) (A) (A) (A) (A) (A) (A) (A) (A) (A)
                 (A) (A) (A) (A) (A) (A) (A) (A) (A) (A) (A) (A)
                 (A) (A) (A) (A) (A) (A) (A) (A) (A) (A) (A) (A)
                 (A) (A) (A) (A) (A) (A) (A) (A) (A) (A) (A) (A)
                 (A) (A) (A) (A) (A) (A) (A) (A) (A) (A) (A) (A)
                 (A) (A) (A) (A) (A) (A) (A) (A) (A) (A) (A) (A)
                 (A) (A) (A) (A) (A) (A) (A) (A) (A) (A) (A) (A)
                 (A) (A) (A) (A) (A) (A) (A) (A) (A) (A) (A) (A)
                 (A) (A) (A) (A) (A) (A) (A) (A) (A) (A) (A) (A)
                 (A) (A) (A) (A) (A) (A) (A) (A) (A) (A) (A) (A)
                 (A) (A) (A) (A) (A) (A) (A) (A) (A) (A) (A) (A)
                 (A) (A) (A) (A) (A) (A) (A) (A) (A) (A) (A) (A)
                 (A) (A) (A) (A) (A) (A) (A) (A) (A) (A) (A) (A)
                 (A) (A) (A) (A) (A) (A) (A) (A) (A) (A) (A) (A)
                 (A) (A) (A) (A) (A) (A) (A) (A) (A) (A) (A) (A)
                 (A) (A) (A) (A) (A) (A) (A) (A) (A) (A) (A) (A)
                 (A) (A) (A) (A) (A) (A) (A) (A) (A) (A) (A) (A)
                 (A) (A) (A) (A) (A) (A) (A) (A) (A) (A) (A) (A)
                 (A) (A) (A) (A) (A) (A) (A) (A) (A) (A) (A) (A)
                 (A) (A) (A) (A) (A) (A) (A) (A) (A) (A) (A) (A)
                 (A) (A) (A) (A) (A) (A) (A) (A) (A) (A) (A) (A)
                 (A) (A) (A) (A) (A) (A) (A) (A) (A) (A) (A) (A)
                 (A) (A) (A) (A) (A) (A) (A) (A) (A) (A) (A) (A)
                 (A) (A) (A) (A) (A) (A) (A) (A) (A) (A) (A) (A)
                 (A) (A) (A) (A) (A) (A) (A) (A) (A) (A) (A) (A)
                 (A) (A) (A) (A) (A) (A) (A) (A) (A) (A) (A) (A)
                 (A) (A) (A) (A) (A) (A) (A) (A) (A) (A) (A) (A)
                 (A) (A) (A) (A) (A) (A) (A) (A) (A) (A) (A) (A)
                 (A) (A) (A) (A) (A) (A) (A) (A) (A) (A) (A) (A)
                 (A) (A) (A) (A) (A) (A) (A) (A) (A) (A) (A) (A)
                 (A) (A) (A) (A) (A) (A) (A) (A) (A) (A) (A) (A)
                 (A) (A) (A) (A) (A) (A) (A) (A) (A) (A) (A) (A)
                 (A) (A) (A) (A) (A) (A) (A) (A) (A) (A) (A) (A)
                 (A) (A) (A) (A) (A) (A) (A) (A) (A) (A) (A) (A)
                 (A) (A) (A) (A) (A) (A) (A) (A) (A)
 The electronic state of the initial guess is 1-A.
 Requested convergence on RMS density matrix=1.00D-08 within 128 cycles.
 Requested convergence on MAX density matrix=1.00D-06.
 Requested convergence on             energy=1.00D-06.
 No special actions if energy rises.
 Integral accuracy reduced to 1.0D-05 until final iterations.
 Initial convergence to 1.0D-05 achieved.  Increase integral accuracy.
 SCF Done:  E(RB+HF-LYP) =  -1345.22046677     A.U. after   14 cycles
             Convg  =    0.9312D-08             -V/T =  2.0086
             S**2   =   0.0000

 **********************************************************************

            Population analysis using the SCF density.

 **********************************************************************

 Orbital symmetries:
       Occupied  (A) (A) (A) (A) (A) (A) (A) (A) (A) (A) (A) (A)
                 (A) (A) (A) (A) (A) (A) (A) (A) (A) (A) (A) (A)
                 (A) (A) (A) (A) (A) (A) (A) (A) (A) (A) (A) (A)
                 (A) (A) (A) (A) (A) (A) (A) (A) (A) (A) (A) (A)
                 (A) (A) (A) (A) (A) (A) (A) (A) (A) (A) (A) (A)
                 (A) (A) (A) (A) (A) (A) (A) (A) (A) (A) (A) (A)
                 (A) (A) (A) (A) (A) (A) (A) (A) (A) (A) (A) (A)
                 (A) (A) (A) (A) (A) (A) (A) (A) (A) (A) (A) (A)
                 (A) (A) (A) (A) (A) (A) (A) (A) (A) (A) (A) (A)
                 (A) (A) (A)
       Virtual   (A) (A) (A) (A) (A) (A) (A) (A) (A) (A) (A) (A)
                 (A) (A) (A) (A) (A) (A) (A) (A) (A) (A) (A) (A)
                 (A) (A) (A) (A) (A) (A) (A) (A) (A) (A) (A) (A)
                 (A) (A) (A) (A) (A) (A) (A) (A) (A) (A) (A) (A)
                 (A) (A) (A) (A) (A) (A) (A) (A) (A) (A) (A) (A)
                 (A) (A) (A) (A) (A) (A) (A) (A) (A) (A) (A) (A)
                 (A) (A) (A) (A) (A) (A) (A) (A) (A) (A) (A) (A)
                 (A) (A) (A) (A) (A) (A) (A) (A) (A) (A) (A) (A)
                 (A) (A) (A) (A) (A) (A) (A) (A) (A) (A) (A) (A)
                 (A) (A) (A) (A) (A) (A) (A) (A) (A) (A) (A) (A)
                 (A) (A) (A) (A) (A) (A) (A) (A) (A) (A) (A) (A)
                 (A) (A) (A) (A) (A) (A) (A) (A) (A) (A) (A) (A)
                 (A) (A) (A) (A) (A) (A) (A) (A) (A) (A) (A) (A)
                 (A) (A) (A) (A) (A) (A) (A) (A) (A) (A) (A) (A)
                 (A) (A) (A) (A) (A) (A) (A) (A) (A) (A) (A) (A)
                 (A) (A) (A) (A) (A) (A) (A) (A) (A) (A) (A) (A)
                 (A) (A) (A) (A) (A) (A) (A) (A) (A) (A) (A) (A)
                 (A) (A) (A) (A) (A) (A) (A) (A) (A) (A) (A) (A)
                 (A) (A) (A) (A) (A) (A) (A) (A) (A) (A) (A) (A)
                 (A) (A) (A) (A) (A) (A) (A) (A) (A) (A) (A) (A)
                 (A) (A) (A) (A) (A) (A) (A) (A) (A) (A) (A) (A)
                 (A) (A) (A) (A) (A) (A) (A) (A) (A) (A) (A) (A)
                 (A) (A) (A) (A) (A) (A) (A) (A) (A) (A) (A) (A)
                 (A) (A) (A) (A) (A) (A) (A) (A) (A) (A) (A) (A)
                 (A) (A) (A) (A) (A) (A) (A) (A) (A) (A) (A) (A)
                 (A) (A) (A) (A) (A) (A) (A) (A) (A) (A) (A) (A)
                 (A) (A) (A) (A) (A) (A) (A) (A) (A) (A) (A) (A)
                 (A) (A) (A) (A) (A) (A) (A) (A) (A) (A) (A) (A)
                 (A) (A) (A) (A) (A) (A) (A) (A) (A) (A) (A) (A)
                 (A) (A) (A) (A) (A) (A) (A) (A) (A) (A) (A) (A)
                 (A) (A) (A) (A) (A) (A) (A) (A) (A) (A) (A) (A)
                 (A) (A) (A) (A) (A) (A) (A) (A) (A) (A) (A) (A)
                 (A) (A) (A) (A) (A) (A) (A) (A) (A) (A) (A) (A)
                 (A) (A) (A) (A) (A) (A) (A) (A) (A) (A) (A) (A)
                 (A) (A) (A) (A) (A) (A) (A) (A) (A) (A) (A) (A)
                 (A) (A) (A) (A) (A) (A) (A) (A) (A) (A) (A) (A)
                 (A) (A) (A) (A) (A) (A) (A) (A) (A) (A) (A) (A)
                 (A) (A) (A) (A) (A) (A) (A) (A) (A) (A) (A) (A)
                 (A) (A) (A) (A) (A) (A) (A) (A) (A) (A) (A) (A)
                 (A) (A) (A) (A) (A) (A) (A) (A) (A) (A) (A) (A)
                 (A) (A) (A) (A) (A) (A) (A) (A) (A)
 The electronic state is 1-A.
 Alpha  occ. eigenvalues --  -19.18641 -19.18397 -19.11319 -10.25506 -10.25393
 Alpha  occ. eigenvalues --  -10.25170 -10.25110 -10.24903 -10.20023 -10.19861
 Alpha  occ. eigenvalues --  -10.19460 -10.19430 -10.19400 -10.19353 -10.19232
 Alpha  occ. eigenvalues --  -10.19214 -10.19095 -10.19061 -10.19044 -10.19009
 Alpha  occ. eigenvalues --  -10.18977 -10.18953 -10.18901 -10.18877 -10.18835
 Alpha  occ. eigenvalues --  -10.18779 -10.18721 -10.18678 -10.18598 -10.18331
 Alpha  occ. eigenvalues --  -10.18218 -10.17688  -1.08430  -1.08208  -1.02858
 Alpha  occ. eigenvalues --   -0.87042  -0.86668  -0.86184  -0.85630  -0.80291
 Alpha  occ. eigenvalues --   -0.78928  -0.78022  -0.75722  -0.75448  -0.75157
 Alpha  occ. eigenvalues --   -0.75102  -0.74837  -0.73331  -0.69960  -0.69391
 Alpha  occ. eigenvalues --   -0.64248  -0.62497  -0.61983  -0.61627  -0.61138
 Alpha  occ. eigenvalues --   -0.60302  -0.59031  -0.58526  -0.57339  -0.54864
 Alpha  occ. eigenvalues --   -0.54409  -0.53163  -0.52349  -0.52104  -0.50445
 Alpha  occ. eigenvalues --   -0.49188  -0.48979  -0.48399  -0.47774  -0.46342
 Alpha  occ. eigenvalues --   -0.46201  -0.45771  -0.44588  -0.44445  -0.44238
 Alpha  occ. eigenvalues --   -0.43892  -0.42942  -0.42767  -0.42429  -0.42405
 Alpha  occ. eigenvalues --   -0.42278  -0.41757  -0.41164  -0.40113  -0.39607
 Alpha  occ. eigenvalues --   -0.39149  -0.38314  -0.37673  -0.37221  -0.36757
 Alpha  occ. eigenvalues --   -0.36445  -0.36304  -0.35575  -0.34911  -0.34704
 Alpha  occ. eigenvalues --   -0.34527  -0.34345  -0.33740  -0.32893  -0.32505
 Alpha  occ. eigenvalues --   -0.31852  -0.27804  -0.25968  -0.25597  -0.25580
 Alpha  occ. eigenvalues --   -0.25432  -0.25139  -0.25021  -0.23645  -0.22271
 Alpha  occ. eigenvalues --   -0.21159
 Alpha virt. eigenvalues --   -0.05955  -0.00897  -0.00744  -0.00544  -0.00355
 Alpha virt. eigenvalues --   -0.00195  -0.00168   0.00112   0.05049   0.09126
 Alpha virt. eigenvalues --    0.09255   0.09351   0.09899   0.10580   0.10695
 Alpha virt. eigenvalues --    0.11281   0.12105   0.12980   0.13167   0.14060
 Alpha virt. eigenvalues --    0.14279   0.14922   0.15163   0.15562   0.15855
 Alpha virt. eigenvalues --    0.16063   0.16651   0.17454   0.17764   0.18030
 Alpha virt. eigenvalues --    0.18142   0.18798   0.19038   0.19159   0.19407
 Alpha virt. eigenvalues --    0.19932   0.20777   0.21399   0.21696   0.22767
 Alpha virt. eigenvalues --    0.23899   0.24203   0.25696   0.26642   0.27218
 Alpha virt. eigenvalues --    0.28114   0.29207   0.30246   0.30520   0.30666
 Alpha virt. eigenvalues --    0.31318   0.31693   0.32272   0.32475   0.34058
 Alpha virt. eigenvalues --    0.34142   0.34345   0.34417   0.34787   0.36488
 Alpha virt. eigenvalues --    0.36853   0.39065   0.40378   0.43301   0.45509
 Alpha virt. eigenvalues --    0.46040   0.46415   0.48132   0.48335   0.48897
 Alpha virt. eigenvalues --    0.50717   0.51583   0.52103   0.52270   0.53124
 Alpha virt. eigenvalues --    0.53197   0.53689   0.54150   0.54429   0.54768
 Alpha virt. eigenvalues --    0.54928   0.55581   0.56025   0.56292   0.56554
 Alpha virt. eigenvalues --    0.56947   0.57207   0.57595   0.57779   0.58320
 Alpha virt. eigenvalues --    0.58593   0.58763   0.59142   0.59241   0.59401
 Alpha virt. eigenvalues --    0.59480   0.59608   0.59773   0.60037   0.60362
 Alpha virt. eigenvalues --    0.60730   0.61003   0.61306   0.61396   0.61535
 Alpha virt. eigenvalues --    0.61660   0.62015   0.62275   0.62501   0.62726
 Alpha virt. eigenvalues --    0.63489   0.63625   0.64046   0.65162   0.65458
 Alpha virt. eigenvalues --    0.65739   0.66128   0.66146   0.66778   0.67811
 Alpha virt. eigenvalues --    0.68360   0.68982   0.70737   0.71184   0.71700
 Alpha virt. eigenvalues --    0.72826   0.73740   0.75239   0.75419   0.75856
 Alpha virt. eigenvalues --    0.77081   0.77901   0.78917   0.79519   0.80356
 Alpha virt. eigenvalues --    0.80475   0.80941   0.81235   0.81729   0.82191
 Alpha virt. eigenvalues --    0.82470   0.82735   0.82927   0.83150   0.83325
 Alpha virt. eigenvalues --    0.84298   0.84664   0.85240   0.85504   0.86079
 Alpha virt. eigenvalues --    0.86254   0.87221   0.87999   0.89244   0.89715
 Alpha virt. eigenvalues --    0.89803   0.89925   0.90574   0.91412   0.92515
 Alpha virt. eigenvalues --    0.93193   0.93544   0.94163   0.94693   0.95005
 Alpha virt. eigenvalues --    0.95751   0.96083   0.96300   0.98516   0.98764
 Alpha virt. eigenvalues --    0.99408   1.00194   1.00333   1.00667   1.01989
 Alpha virt. eigenvalues --    1.03962   1.04780   1.04948   1.06813   1.07150
 Alpha virt. eigenvalues --    1.08427   1.09745   1.10129   1.10632   1.11190
 Alpha virt. eigenvalues --    1.12040   1.12369   1.14633   1.15019   1.15937
 Alpha virt. eigenvalues --    1.16627   1.17128   1.17946   1.18338   1.18750
 Alpha virt. eigenvalues --    1.18918   1.20504   1.21286   1.21831   1.22063
 Alpha virt. eigenvalues --    1.22377   1.24702   1.25312   1.26084   1.26895
 Alpha virt. eigenvalues --    1.27013   1.27771   1.29138   1.30053   1.31518
 Alpha virt. eigenvalues --    1.32765   1.33318   1.33659   1.33781   1.36063
 Alpha virt. eigenvalues --    1.37060   1.38545   1.39691   1.39805   1.40113
 Alpha virt. eigenvalues --    1.40270   1.40357   1.40524   1.41105   1.41504
 Alpha virt. eigenvalues --    1.41707   1.41849   1.41893   1.41952   1.42251
 Alpha virt. eigenvalues --    1.42892   1.43353   1.44257   1.46436   1.46994
 Alpha virt. eigenvalues --    1.47316   1.49030   1.49462   1.50170   1.51213
 Alpha virt. eigenvalues --    1.52446   1.55085   1.58422   1.62544   1.68329
 Alpha virt. eigenvalues --    1.68555   1.70141   1.70733   1.71170   1.72749
 Alpha virt. eigenvalues --    1.75421   1.75808   1.76395   1.77362   1.77699
 Alpha virt. eigenvalues --    1.78174   1.78402   1.79026   1.79931   1.80775
 Alpha virt. eigenvalues --    1.81820   1.84073   1.84589   1.85637   1.86182
 Alpha virt. eigenvalues --    1.86906   1.87493   1.87685   1.88145   1.89630
 Alpha virt. eigenvalues --    1.89925   1.90540   1.90586   1.91163   1.91433
 Alpha virt. eigenvalues --    1.91915   1.92572   1.92737   1.93251   1.93868
 Alpha virt. eigenvalues --    1.93995   1.94340   1.94929   1.95593   1.96164
 Alpha virt. eigenvalues --    1.96854   1.97134   1.97506   1.97813   1.98086
 Alpha virt. eigenvalues --    1.98297   1.98594   1.99386   1.99579   2.00776
 Alpha virt. eigenvalues --    2.01148   2.01661   2.02558   2.02873   2.03521
 Alpha virt. eigenvalues --    2.04347   2.05262   2.06211   2.06472   2.06609
 Alpha virt. eigenvalues --    2.08729   2.09686   2.09765   2.10876   2.11590
 Alpha virt. eigenvalues --    2.11874   2.12196   2.13131   2.15386   2.15783
 Alpha virt. eigenvalues --    2.16283   2.23210   2.23974   2.26520   2.26734
 Alpha virt. eigenvalues --    2.27295   2.27587   2.27729   2.29936   2.30344
 Alpha virt. eigenvalues --    2.30483   2.30731   2.30896   2.31061   2.31922
 Alpha virt. eigenvalues --    2.32379   2.33478   2.34292   2.34555   2.36478
 Alpha virt. eigenvalues --    2.37882   2.38044   2.38596   2.38728   2.39894
 Alpha virt. eigenvalues --    2.40947   2.41113   2.41320   2.41553   2.41654
 Alpha virt. eigenvalues --    2.41878   2.42310   2.43652   2.44226   2.45049
 Alpha virt. eigenvalues --    2.45242   2.45489   2.47056   2.48054   2.48989
 Alpha virt. eigenvalues --    2.49362   2.49594   2.50033   2.50137   2.50799
 Alpha virt. eigenvalues --    2.50879   2.51175   2.51617   2.53061   2.53252
 Alpha virt. eigenvalues --    2.53641   2.54083   2.55216   2.55779   2.56171
 Alpha virt. eigenvalues --    2.56651   2.57558   2.60552   2.60980   2.61103
 Alpha virt. eigenvalues --    2.61238   2.61478   2.62717   2.63702   2.63838
 Alpha virt. eigenvalues --    2.64422   2.65784   2.66374   2.67251   2.67368
 Alpha virt. eigenvalues --    2.69544   2.69795   2.69869   2.70771   2.72150
 Alpha virt. eigenvalues --    2.73470   2.73931   2.74657   2.74947   2.76810
 Alpha virt. eigenvalues --    2.77082   2.77510   2.77694   2.78319   2.79734
 Alpha virt. eigenvalues --    2.82138   2.82662   2.82752   2.83602   2.84426
 Alpha virt. eigenvalues --    2.85255   2.85991   2.88064   2.88932   2.90202
 Alpha virt. eigenvalues --    2.93118   2.95481   2.98693   3.00596   3.01239
 Alpha virt. eigenvalues --    3.02097   3.04827   3.07858   3.07997   3.08363
 Alpha virt. eigenvalues --    3.08927   3.10853   3.13719   3.16610   3.19824
 Alpha virt. eigenvalues --    3.21361   3.21517   3.23222   3.23991   3.25807
 Alpha virt. eigenvalues --    3.25942   3.26930   3.27080   3.27946   3.28164
 Alpha virt. eigenvalues --    3.28621   3.28950   3.36892   3.38393   3.38571
 Alpha virt. eigenvalues --    3.39445   3.39921   3.43772   3.44323   3.44714
 Alpha virt. eigenvalues --    3.48159   3.48465   3.53530   3.53680   3.54018
 Alpha virt. eigenvalues --    3.54749   3.55715   3.62013   3.86825   3.89071
 Alpha virt. eigenvalues --    3.93640   3.93780   3.98530   4.09390   4.09799
 Alpha virt. eigenvalues --    4.11690   4.13856   4.13991   4.15257   4.15325
 Alpha virt. eigenvalues --    4.15419   4.15918   4.15994   4.16411   4.17111
 Alpha virt. eigenvalues --    4.22261   4.32269   4.35041   4.37831   4.40958
 Alpha virt. eigenvalues --    4.43623   4.43829   4.44081   4.44125   4.47069
 Alpha virt. eigenvalues --    4.52498   4.54492   4.54870   4.60378   4.67140
 Alpha virt. eigenvalues --    4.84850   4.85112   4.87954   4.90431
          Condensed to atoms (all electrons):
 Mulliken atomic charges:
              1
     1  C   -0.112652
     2  C   -0.122930
     3  C    0.361608
     4  C   -0.133392
     5  C   -0.145797
     6  C    0.129449
     7  O   -0.516678
     8  C   -0.082836
     9  C   -0.154070
    10  C    0.367092
    11  C    0.041493
    12  C   -0.111456
    13  C   -0.134358
    14  C    0.366340
    15  C   -0.131655
    16  C   -0.113693
    17  O   -0.517434
    18  C    0.008954
    19  C    0.077753
    20  C   -0.094745
    21  C   -0.086633
    22  C   -0.080006
    23  C   -0.082711
    24  C   -0.119654
    25  O   -0.485346
    26  C    0.009288
    27  C    0.077396
    28  C   -0.119602
    29  C   -0.082806
    30  C   -0.080122
    31  C   -0.086696
    32  C   -0.094673
    33  H    0.085200
    34  H    0.096997
    35  H    0.091573
    36  H    0.092863
    37  H    0.112069
    38  H    0.078472
    39  H    0.112258
    40  H    0.091212
    41  H    0.094124
    42  H    0.086767
    43  H    0.116824
    44  H    0.104951
    45  H    0.093684
    46  H    0.087302
    47  H    0.085839
    48  H    0.086408
    49  H    0.079402
    50  H    0.117858
    51  H    0.105420
    52  H    0.079392
    53  H    0.085966
    54  H    0.085288
    55  H    0.086821
    56  H    0.093884
 Sum of Mulliken charges=   0.00000
 Atomic charges with hydrogens summed into heavy atoms:
              1
     1  C   -0.027452
     2  C   -0.025933
     3  C    0.361608
     4  C   -0.041819
     5  C   -0.052935
     6  C    0.129449
     7  O   -0.516678
     8  C    0.029234
     9  C   -0.075599
    10  C    0.367092
    11  C    0.041493
    12  C    0.000802
    13  C   -0.043146
    14  C    0.366340
    15  C   -0.037532
    16  C   -0.026926
    17  O   -0.517434
    18  C    0.230729
    19  C    0.077753
    20  C   -0.001061
    21  C    0.000670
    22  C    0.005833
    23  C    0.003697
    24  C   -0.040252
    25  O   -0.485346
    26  C    0.232566
    27  C    0.077396
    28  C   -0.040210
    29  C    0.003160
    30  C    0.005165
    31  C    0.000125
    32  C   -0.000789
    33  H    0.000000
    34  H    0.000000
    35  H    0.000000
    36  H    0.000000
    37  H    0.000000
    38  H    0.000000
    39  H    0.000000
    40  H    0.000000
    41  H    0.000000
    42  H    0.000000
    43  H    0.000000
    44  H    0.000000
    45  H    0.000000
    46  H    0.000000
    47  H    0.000000
    48  H    0.000000
    49  H    0.000000
    50  H    0.000000
    51  H    0.000000
    52  H    0.000000
    53  H    0.000000
    54  H    0.000000
    55  H    0.000000
    56  H    0.000000
 Sum of Mulliken charges=   0.00000
 Electronic spatial extent (au):  <R**2>= 41115.5702
 Charge=     0.0000 electrons
 Dipole moment (field-independent basis, Debye):
    X=     0.9763    Y=    -1.8256    Z=     0.0345  Tot=     2.0705
 Quadrupole moment (field-independent basis, Debye-Ang):
   XX=  -122.4080   YY=  -186.0119   ZZ=  -181.6804
   XY=     4.6747   XZ=    -5.8228   YZ=    -0.2642
 Traceless Quadrupole moment (field-independent basis, Debye-Ang):
   XX=    40.9588   YY=   -22.6452   ZZ=   -18.3136
   XY=     4.6747   XZ=    -5.8228   YZ=    -0.2642
 Octapole moment (field-independent basis, Debye-Ang**2):
  XXX=    12.3770  YYY=   -32.0511  ZZZ=     0.3680  XYY=    18.5902
  XXY=   -28.7674  XXZ=     4.0694  XZZ=    -5.6560  YZZ=    -6.1012
  YYZ=    -0.7562  XYZ=   -60.3466
 Hexadecapole moment (field-independent basis, Debye-Ang**3):
 XXXX=-45978.8105 YYYY= -2890.1407 ZZZZ=  -571.1323 XXXY=     9.3173
 XXXZ= -1061.4161 YYYX=    58.3990 YYYZ=    -0.1738 ZZZX=    -7.2030
 ZZZY=     0.9058 XXYY= -8798.3170 XXZZ= -8693.0011 YYZZ=  -543.6834
 XXYZ=   -21.9904 YYXZ=   141.4458 ZZXY=    -2.4170
 N-N= 2.518775052230D+03 E-N=-8.162185266248D+03  KE= 1.333800367171D+03
 ***** Axes restored to original set *****
 -------------------------------------------------------------------
 Center     Atomic                   Forces (Hartrees/Bohr)
 Number     Number              X              Y              Z
 -------------------------------------------------------------------
    1          6          -0.002525019   -0.000128038   -0.002367226
    2          6          -0.002231078   -0.000051013    0.001552962
    3          6          -0.001275007    0.000196942   -0.000488452
    4          6           0.005300461    0.000052452   -0.004163451
    5          6           0.006844404    0.000058964    0.004407719
    6          6          -0.003126655    0.000082139   -0.016907558
    7          8          -0.015047970   -0.000021776    0.006713385
    8          6           0.006406663    0.000471534    0.021914581
    9          6          -0.008297288   -0.001071524   -0.014252849
   10          6          -0.036923991   -0.007055397    0.014159402
   11          6           0.003549376    0.000785883    0.007311930
   12          6           0.000888537    0.001027538   -0.004157693
   13          6           0.004011949    0.001587987   -0.001027403
   14          6           0.001328913    0.000217004    0.000170757
   15          6          -0.001942687   -0.001054580    0.001644701
   16          6          -0.000772290   -0.000163364    0.003006964
   17          8          -0.014430438   -0.006656774    0.005464502
   18          6           0.001449611   -0.000350473    0.008465870
   19          6           0.001740237    0.000308578   -0.008234708
   20          6          -0.000954869    0.001670963   -0.002451018
   21          6          -0.002228809    0.001533231    0.001946368
   22          6          -0.001719604    0.001129601    0.002886936
   23          6           0.002487018   -0.002172889    0.000992251
   24          6           0.002495683   -0.002689746    0.000952201
   25          8           0.042634801    0.008327061   -0.015883874
   26          6          -0.005380203   -0.000417624   -0.006363914
   27          6           0.007149596    0.001627835    0.004265876
   28          6          -0.000170899    0.003234651   -0.001938744
   29          6          -0.000028201    0.002767705   -0.002041389
   30          6          -0.002730025   -0.002119631   -0.000929540
   31          6          -0.002148012   -0.002502917    0.000003105
   32          6           0.001785160   -0.001514356    0.002007592
   33          1          -0.006728566   -0.000000203   -0.004353965
   34          1          -0.006512809    0.000056750    0.004191010
   35          1           0.006816324   -0.000023798    0.004218208
   36          1           0.006362296    0.000000331   -0.004147641
   37          1           0.007984376    0.000409362   -0.003651930
   38          1          -0.008475255   -0.000669047    0.002791179
   39          1           0.007605854    0.003044413   -0.001355195
   40          1           0.000942752    0.002044590   -0.007784275
   41          1          -0.006904499   -0.003192580    0.001746093
   42          1          -0.000773716   -0.002031746    0.007843187
   43          1           0.005568884    0.006713651   -0.002270088
   44          1           0.005983701   -0.006491749   -0.001234595
   45          1          -0.003555240    0.004058455   -0.005503627
   46          1          -0.005450771    0.004643608    0.002149865
   47          1          -0.001883545    0.000429107    0.007211570
   48          1           0.003581910   -0.004327567    0.004897433
   49          1           0.005360841   -0.004593456   -0.002596257
   50          1           0.007343678   -0.003760095   -0.003685286
   51          1           0.002136880    0.008387694   -0.002292637
   52          1           0.003458861    0.006570567   -0.001230739
   53          1          -0.002905953    0.004593124   -0.005105982
   54          1          -0.006163298   -0.002126260   -0.003640930
   55          1          -0.003173471   -0.006584789    0.001585587
   56          1           0.003241401   -0.004260330    0.005559733
 -------------------------------------------------------------------
 Cartesian Forces:  Max     0.042634801 RMS     0.006732402

 GradGradGradGradGradGradGradGradGradGradGradGradGradGradGradGradGradGrad
 Berny optimization.
 Internal  Forces:  Max     0.046252287 RMS     0.005292958
 Search for a local minimum.
 Step number   1 out of a maximum of 298
 All quantities printed in internal units (Hartrees-Bohrs-Radians)
 Second derivative matrix not updated -- first step.
     Eigenvalues ---    0.00652   0.00652   0.00824   0.00883   0.00940
     Eigenvalues ---    0.01177   0.01601   0.01602   0.01602   0.01608
     Eigenvalues ---    0.01762   0.01853   0.02011   0.02105   0.02151
     Eigenvalues ---    0.02190   0.02219   0.02227   0.02239   0.02240
     Eigenvalues ---    0.02251   0.02255   0.02258   0.02262   0.02263
     Eigenvalues ---    0.02263   0.02265   0.02267   0.02267   0.02268
     Eigenvalues ---    0.02273   0.02273   0.02273   0.02278   0.02280
     Eigenvalues ---    0.02280   0.02287   0.02287   0.02289   0.02292
     Eigenvalues ---    0.02294   0.02294   0.02302   0.02302   0.02324
     Eigenvalues ---    0.02351   0.02421   0.02434   0.03020   0.06463
     Eigenvalues ---    0.06466   0.07405   0.07406   0.11444   0.11451
     Eigenvalues ---    0.13919   0.13922   0.15996   0.15998   0.15999
     Eigenvalues ---    0.15999   0.15999   0.15999   0.16000   0.16000
     Eigenvalues ---    0.16000   0.16000   0.16000   0.16000   0.16000
     Eigenvalues ---    0.16000   0.16000   0.16000   0.16000   0.16000
     Eigenvalues ---    0.16000   0.16000   0.22000   0.22000   0.22000
     Eigenvalues ---    0.22000   0.22000   0.22000   0.22000   0.22000
     Eigenvalues ---    0.22041   0.22041   0.22961   0.22964   0.23472
     Eigenvalues ---    0.23473   0.23999   0.24000   0.24982   0.24982
     Eigenvalues ---    0.24994   0.24998   0.25000   0.25000   0.25000
     Eigenvalues ---    0.25000   0.25000   0.25000   0.31487   0.31493
     Eigenvalues ---    0.32843   0.33797   0.35116   0.35140   0.35341
     Eigenvalues ---    0.35362   0.35869   0.36388   0.36388   0.36392
     Eigenvalues ---    0.36459   0.36503   0.36505   0.36515   0.36517
     Eigenvalues ---    0.36519   0.36521   0.36629   0.36632   0.36665
     Eigenvalues ---    0.36702   0.36724   0.36747   0.36789   0.36926
     Eigenvalues ---    0.36928   0.36930   0.42585   0.42921   0.43034
     Eigenvalues ---    0.43334   0.43335   0.43377   0.43438   0.43439
     Eigenvalues ---    0.44502   0.44585   0.46338   0.46830   0.47200
     Eigenvalues ---    0.47245   0.47514   0.47518   0.47866   0.47893
     Eigenvalues ---    0.47894   0.47986   0.48171   0.48171   0.48530
     Eigenvalues ---    0.48535   0.49305   0.49956   0.56129   0.56338
     Eigenvalues ---    0.59594   1.035471000.000001000.000001000.00000
     Eigenvalues --- 1000.000001000.000001000.000001000.000001000.00000
     Eigenvalues --- 1000.000001000.000001000.000001000.000001000.00000
     Eigenvalues --- 1000.000001000.000001000.000001000.000001000.00000
     Eigenvalues --- 1000.000001000.000001000.000001000.000001000.00000
     Eigenvalues --- 1000.000001000.000001000.000001000.000001000.00000
     Eigenvalues --- 1000.000001000.000001000.000001000.000001000.00000
     Eigenvalues --- 1000.000001000.000001000.000001000.000001000.00000
     Eigenvalues --- 1000.000001000.000001000.000001000.000001000.00000
     Eigenvalues --- 1000.000001000.000001000.000001000.000001000.00000
     Eigenvalues --- 1000.000001000.000001000.000001000.000001000.00000
     Eigenvalues --- 1000.000001000.000001000.000001000.000001000.00000
     Eigenvalues --- 1000.000001000.000001000.000001000.000001000.00000
     Eigenvalues --- 1000.000001000.000001000.000001000.000001000.00000
     Eigenvalues --- 1000.000001000.000001000.000001000.000001000.00000
     Eigenvalues --- 1000.000001000.000001000.000001000.000001000.00000
     Eigenvalues --- 1000.000001000.000001000.000001000.000001000.00000
     Eigenvalues --- 1000.000001000.000001000.000001000.000001000.00000
     Eigenvalues --- 1000.000001000.000001000.000001000.000001000.00000
     Eigenvalues --- 1000.000001000.000001000.000001000.000001000.00000
     Eigenvalues --- 1000.000001000.000001000.000001000.000001000.00000
     Eigenvalues --- 1000.000001000.000001000.000001000.000001000.00000
     Eigenvalues --- 1000.000001000.000001000.000001000.000001000.00000
     Eigenvalues --- 1000.000001000.000001000.000001000.000001000.00000
     Eigenvalues --- 1000.000001000.000001000.000001000.000001000.00000
     Eigenvalues --- 1000.000001000.000001000.00000
 RFO step:  Lambda=-1.50539319D-02.
 Linear search not attempted -- first point.
 Iteration  1 RMS(Cart)=  0.04615248 RMS(Int)=  0.00015288
 Iteration  2 RMS(Cart)=  0.00066432 RMS(Int)=  0.00000320
 Iteration  3 RMS(Cart)=  0.00000045 RMS(Int)=  0.00000320
 Variable       Old X    -DE/DX   Delta X   Delta X   Delta X     New X
                                 (Linear)    (Quad)   (Total)
    R1        2.59147   0.01171   0.00000   0.02242   0.02242   2.61389
    R2        2.64903   0.01024   0.00000   0.02186   0.02186   2.67089
    R3        2.03054   0.00799   0.00000   0.02094   0.02094   2.05148
    R4        2.64055   0.01082   0.00000   0.02275   0.02275   2.66331
    R5        2.02998   0.00774   0.00000   0.02026   0.02026   2.05024
    R6        2.61556   0.01455   0.00000   0.02919   0.02919   2.64475
    R7        2.54142   0.01406   0.00000   0.02439   0.02439   2.56582
    R8        2.62504   0.00752   0.00000   0.01536   0.01536   2.64039
    R9        2.02651   0.00800   0.00000   0.02082   0.02082   2.04733
   R10        2.61922   0.01501   0.00000   0.03031   0.03031   2.64953
   R11        2.03369   0.00758   0.00000   0.01996   0.01996   2.05366
   R12        2.77587  -0.00416   0.00000  -0.01113  -0.01113   2.76474
   R13        2.65761   0.01468   0.00000   0.03186   0.03186   2.68946
   R14        2.51263   0.02072   0.00000   0.03390   0.03390   2.54653
   R15        2.03474   0.00879   0.00000   0.02319   0.02319   2.05792
   R16        2.80973   0.00294   0.00000   0.00832   0.00832   2.81805
   R17        2.02658   0.00894   0.00000   0.02327   0.02327   2.04985
   R18        2.82628   0.00376   0.00000   0.01094   0.01094   2.83722
   R19        2.27251   0.04625   0.00000   0.04403   0.04403   2.31654
   R20        2.62347   0.01171   0.00000   0.02372   0.02371   2.64718
   R21        2.63802   0.01055   0.00000   0.02201   0.02201   2.66002
   R22        2.61532   0.00901   0.00000   0.01800   0.01800   2.63332
   R23        2.02866   0.00825   0.00000   0.02154   0.02154   2.05020
   R24        2.62559   0.01314   0.00000   0.02691   0.02692   2.65250
   R25        2.02654   0.00809   0.00000   0.02104   0.02104   2.04759
   R26        2.63206   0.01152   0.00000   0.02395   0.02396   2.65602
   R27        2.53962   0.01485   0.00000   0.02566   0.02566   2.56528
   R28        2.60079   0.01116   0.00000   0.02182   0.02182   2.62260
   R29        2.02965   0.00780   0.00000   0.02040   0.02040   2.05005
   R30        2.02929   0.00811   0.00000   0.02119   0.02119   2.05048
   R31        2.65858   0.01447   0.00000   0.03145   0.03145   2.69003
   R32        2.85082   0.00220   0.00000   0.00666   0.00666   2.85748
   R33        2.05487   0.00897   0.00000   0.02449   0.02449   2.07936
   R34        2.05125   0.00883   0.00000   0.02396   0.02396   2.07520
   R35        2.62824   0.00991   0.00000   0.02033   0.02033   2.64857
   R36        2.61902   0.01137   0.00000   0.02291   0.02291   2.64194
   R37        2.61243   0.01115   0.00000   0.02223   0.02223   2.63465
   R38        2.03110   0.00769   0.00000   0.02017   0.02017   2.05127
   R39        2.62221   0.01013   0.00000   0.02060   0.02060   2.64281
   R40        2.03299   0.00748   0.00000   0.01967   0.01967   2.05266
   R41        2.61262   0.01175   0.00000   0.02346   0.02346   2.63609
   R42        2.03275   0.00747   0.00000   0.01963   0.01963   2.05238
   R43        2.62176   0.00964   0.00000   0.01955   0.01955   2.64131
   R44        2.03281   0.00745   0.00000   0.01960   0.01960   2.05241
   R45        2.03479   0.00751   0.00000   0.01982   0.01982   2.05461
   R46        2.85094   0.00219   0.00000   0.00662   0.00662   2.85756
   R47        2.05448   0.00899   0.00000   0.02454   0.02454   2.07901
   R48        2.05092   0.00886   0.00000   0.02403   0.02403   2.07495
   R49        2.61910   0.01138   0.00000   0.02294   0.02294   2.64205
   R50        2.62820   0.00992   0.00000   0.02034   0.02034   2.64854
   R51        2.62170   0.00968   0.00000   0.01965   0.01965   2.64135
   R52        2.03480   0.00751   0.00000   0.01983   0.01983   2.05463
   R53        2.61267   0.01176   0.00000   0.02350   0.02350   2.63617
   R54        2.03283   0.00746   0.00000   0.01961   0.01961   2.05244
   R55        2.62215   0.01010   0.00000   0.02055   0.02055   2.64270
   R56        2.03277   0.00747   0.00000   0.01964   0.01964   2.05241
   R57        2.61250   0.01111   0.00000   0.02214   0.02214   2.63464
   R58        2.03302   0.00748   0.00000   0.01968   0.01968   2.05269
   R59        2.03104   0.00771   0.00000   0.02020   0.02020   2.05125
    A1        2.11664  -0.00016   0.00000  -0.00067  -0.00067   2.11597
    A2        2.06952   0.00069   0.00000   0.00385   0.00385   2.07337
    A3        2.09702  -0.00054   0.00000  -0.00317  -0.00317   2.09384
    A4        2.10038   0.00010   0.00000   0.00042   0.00042   2.10080
    A5        2.11625   0.00016   0.00000   0.00097   0.00097   2.11722
    A6        2.06655  -0.00025   0.00000  -0.00139  -0.00139   2.06516
    A7        2.08546  -0.00022   0.00000  -0.00078  -0.00078   2.08468
    A8        2.01751   0.00096   0.00000   0.00361   0.00361   2.02112
    A9        2.18021  -0.00074   0.00000  -0.00283  -0.00283   2.17738
   A10        2.08270   0.00035   0.00000   0.00153   0.00153   2.08423
   A11        2.11996  -0.00065   0.00000  -0.00350  -0.00350   2.11645
   A12        2.08053   0.00030   0.00000   0.00197   0.00197   2.08250
   A13        2.13203  -0.00048   0.00000  -0.00203  -0.00203   2.13000
   A14        2.06888   0.00074   0.00000   0.00388   0.00388   2.07276
   A15        2.08228  -0.00026   0.00000  -0.00185  -0.00185   2.08043
   A16        2.04915   0.00041   0.00000   0.00153   0.00153   2.05068
   A17        2.15856  -0.00099   0.00000  -0.00372  -0.00372   2.15484
   A18        2.07548   0.00058   0.00000   0.00218   0.00218   2.07766
   A19        2.09608  -0.00427   0.00000  -0.01612  -0.01612   2.07995
   A20        2.23498   0.00018   0.00000   0.00078   0.00078   2.23576
   A21        2.01700   0.00012   0.00000   0.00084   0.00084   2.01784
   A22        2.03120  -0.00031   0.00000  -0.00162  -0.00162   2.02958
   A23        2.09079   0.00116   0.00000   0.00495   0.00495   2.09574
   A24        2.12103  -0.00061   0.00000  -0.00266  -0.00266   2.11837
   A25        2.07120  -0.00055   0.00000  -0.00230  -0.00230   2.06890
   A26        2.07743  -0.00366   0.00000  -0.01380  -0.01380   2.06363
   A27        2.11303   0.00150   0.00000   0.00569   0.00568   2.11871
   A28        2.09263   0.00216   0.00000   0.00817   0.00817   2.10080
   A29        2.05989  -0.00001   0.00000   0.00015   0.00015   2.06004
   A30        2.16410  -0.00055   0.00000  -0.00191  -0.00191   2.16219
   A31        2.05900   0.00056   0.00000   0.00174   0.00173   2.06074
   A32        2.12446  -0.00024   0.00000  -0.00141  -0.00141   2.12305
   A33        2.06766  -0.00084   0.00000  -0.00475  -0.00475   2.06291
   A34        2.09106   0.00107   0.00000   0.00616   0.00616   2.09723
   A35        2.08406   0.00048   0.00000   0.00204   0.00204   2.08610
   A36        2.08178   0.00026   0.00000   0.00187   0.00187   2.08365
   A37        2.11735  -0.00075   0.00000  -0.00391  -0.00391   2.11344
   A38        2.08863  -0.00071   0.00000  -0.00235  -0.00234   2.08628
   A39        2.17488  -0.00029   0.00000  -0.00127  -0.00128   2.17361
   A40        2.01967   0.00100   0.00000   0.00362   0.00362   2.02329
   A41        2.09656   0.00007   0.00000   0.00066   0.00066   2.09722
   A42        2.06961  -0.00028   0.00000  -0.00175  -0.00175   2.06785
   A43        2.11702   0.00021   0.00000   0.00109   0.00109   2.11811
   A44        2.11356  -0.00016   0.00000  -0.00067  -0.00068   2.11288
   A45        2.10693  -0.00065   0.00000  -0.00382  -0.00382   2.10310
   A46        2.06246   0.00080   0.00000   0.00447   0.00447   2.06693
   A47        2.09886  -0.00405   0.00000  -0.01529  -0.01529   2.08357
   A48        1.90232   0.00045   0.00000   0.00346   0.00345   1.90577
   A49        1.91017  -0.00019   0.00000  -0.00062  -0.00061   1.90956
   A50        1.92185   0.00066   0.00000   0.00707   0.00706   1.92891
   A51        1.92242   0.00011   0.00000  -0.00020  -0.00020   1.92222
   A52        1.92233  -0.00030   0.00000  -0.00126  -0.00128   1.92104
   A53        1.88475  -0.00073   0.00000  -0.00850  -0.00851   1.87624
   A54        2.10586  -0.00035   0.00000  -0.00125  -0.00125   2.10461
   A55        2.09866  -0.00001   0.00000   0.00001   0.00001   2.09867
   A56        2.07807   0.00036   0.00000   0.00126   0.00126   2.07934
   A57        2.10093  -0.00008   0.00000  -0.00042  -0.00042   2.10051
   A58        2.08647  -0.00039   0.00000  -0.00230  -0.00230   2.08417
   A59        2.09573   0.00048   0.00000   0.00269   0.00269   2.09842
   A60        2.09899  -0.00014   0.00000  -0.00052  -0.00052   2.09846
   A61        2.09005   0.00004   0.00000   0.00005   0.00005   2.09010
   A62        2.09415   0.00011   0.00000   0.00047   0.00047   2.09462
   A63        2.08837   0.00011   0.00000   0.00064   0.00064   2.08902
   A64        2.09690  -0.00009   0.00000  -0.00050  -0.00050   2.09640
   A65        2.09791  -0.00002   0.00000  -0.00015  -0.00015   2.09776
   A66        2.09472  -0.00005   0.00000  -0.00012  -0.00012   2.09460
   A67        2.09777   0.00012   0.00000   0.00056   0.00056   2.09833
   A68        2.09067  -0.00006   0.00000  -0.00046  -0.00046   2.09021
   A69        2.10527  -0.00019   0.00000  -0.00087  -0.00087   2.10440
   A70        2.09227  -0.00035   0.00000  -0.00210  -0.00210   2.09017
   A71        2.08563   0.00054   0.00000   0.00297   0.00297   2.08861
   A72        1.90171   0.00031   0.00000   0.00286   0.00285   1.90456
   A73        1.91044  -0.00012   0.00000  -0.00030  -0.00030   1.91014
   A74        1.92207   0.00075   0.00000   0.00764   0.00764   1.92970
   A75        1.92240   0.00009   0.00000  -0.00049  -0.00049   1.92190
   A76        1.92216  -0.00029   0.00000  -0.00126  -0.00128   1.92088
   A77        1.88508  -0.00074   0.00000  -0.00849  -0.00850   1.87659
   A78        2.09827   0.00015   0.00000   0.00065   0.00065   2.09892
   A79        2.10630  -0.00048   0.00000  -0.00174  -0.00174   2.10455
   A80        2.07801   0.00033   0.00000   0.00113   0.00113   2.07914
   A81        2.10532  -0.00020   0.00000  -0.00087  -0.00087   2.10445
   A82        2.09220  -0.00035   0.00000  -0.00210  -0.00210   2.09010
   A83        2.08565   0.00055   0.00000   0.00298   0.00298   2.08864
   A84        2.09473  -0.00004   0.00000  -0.00005  -0.00005   2.09468
   A85        2.09065  -0.00007   0.00000  -0.00050  -0.00050   2.09015
   A86        2.09777   0.00011   0.00000   0.00054   0.00054   2.09832
   A87        2.08830   0.00009   0.00000   0.00056   0.00056   2.08887
   A88        2.09793  -0.00002   0.00000  -0.00012  -0.00012   2.09781
   A89        2.09694  -0.00007   0.00000  -0.00045  -0.00045   2.09650
   A90        2.09906  -0.00014   0.00000  -0.00052  -0.00052   2.09854
   A91        2.09414   0.00010   0.00000   0.00045   0.00045   2.09459
   A92        2.08999   0.00003   0.00000   0.00007   0.00007   2.09005
   A93        2.10092  -0.00004   0.00000  -0.00026  -0.00026   2.10066
   A94        2.08643  -0.00039   0.00000  -0.00223  -0.00223   2.08419
   A95        2.09578   0.00043   0.00000   0.00247   0.00247   2.09825
    D1        0.00053   0.00000   0.00000  -0.00011  -0.00011   0.00042
    D2        3.14156  -0.00001   0.00000  -0.00032  -0.00032   3.14124
    D3       -3.13708  -0.00001   0.00000  -0.00033  -0.00033  -3.13741
    D4        0.00395  -0.00002   0.00000  -0.00054  -0.00054   0.00341
    D5       -0.00194   0.00001   0.00000   0.00019   0.00019  -0.00175
    D6        3.14109   0.00000   0.00000  -0.00005  -0.00005   3.14104
    D7        3.13560   0.00002   0.00000   0.00043   0.00043   3.13604
    D8       -0.00455   0.00001   0.00000   0.00019   0.00019  -0.00436
    D9       -0.00032   0.00001   0.00000   0.00016   0.00016  -0.00016
   D10       -3.14017   0.00004   0.00000   0.00104   0.00105  -3.13912
   D11       -3.14137   0.00001   0.00000   0.00036   0.00036  -3.14101
   D12        0.00198   0.00005   0.00000   0.00124   0.00124   0.00322
   D13        0.00157  -0.00001   0.00000  -0.00028  -0.00028   0.00129
   D14       -3.13955   0.00002   0.00000   0.00040   0.00040  -3.13915
   D15        3.14124  -0.00004   0.00000  -0.00125  -0.00124   3.13999
   D16        0.00012  -0.00002   0.00000  -0.00057  -0.00056  -0.00045
   D17       -3.11451  -0.00001   0.00000  -0.00016  -0.00016  -3.11467
   D18        0.02894   0.00003   0.00000   0.00078   0.00078   0.02972
   D19       -0.00313   0.00001   0.00000   0.00038   0.00038  -0.00274
   D20        3.14003   0.00001   0.00000   0.00034   0.00034   3.14037
   D21        3.13801  -0.00001   0.00000  -0.00028  -0.00028   3.13772
   D22       -0.00202  -0.00001   0.00000  -0.00033  -0.00033  -0.00235
   D23        0.00326  -0.00001   0.00000  -0.00033  -0.00033   0.00293
   D24       -3.13970   0.00000   0.00000  -0.00010  -0.00010  -3.13981
   D25       -3.13991  -0.00001   0.00000  -0.00028  -0.00028  -3.14019
   D26        0.00031   0.00000   0.00000  -0.00005  -0.00005   0.00026
   D27       -0.05204   0.00016   0.00000   0.00537   0.00537  -0.04667
   D28        3.09231   0.00007   0.00000   0.00303   0.00302   3.09533
   D29        3.09102   0.00015   0.00000   0.00512   0.00512   3.09614
   D30       -0.04782   0.00006   0.00000   0.00278   0.00278  -0.04504
   D31        3.09988  -0.00003   0.00000  -0.00191  -0.00192   3.09795
   D32        0.99644  -0.00032   0.00000  -0.00342  -0.00342   0.99302
   D33       -1.07281   0.00029   0.00000   0.00311   0.00313  -1.06968
   D34        3.12864   0.00000   0.00000  -0.00026  -0.00026   3.12838
   D35        0.00724   0.00001   0.00000   0.00010   0.00010   0.00734
   D36       -0.01572   0.00009   0.00000   0.00210   0.00210  -0.01362
   D37       -3.13713   0.00010   0.00000   0.00246   0.00246  -3.13466
   D38        3.01343   0.00028   0.00000   0.01120   0.01120   3.02464
   D39       -0.14275   0.00039   0.00000   0.01597   0.01596  -0.12679
   D40       -0.14777   0.00026   0.00000   0.01084   0.01084  -0.13693
   D41        2.97923   0.00038   0.00000   0.01560   0.01560   2.99483
   D42        2.88046   0.00051   0.00000   0.02174   0.02174   2.90220
   D43       -0.28272   0.00048   0.00000   0.02051   0.02051  -0.26221
   D44       -0.24671   0.00040   0.00000   0.01705   0.01705  -0.22966
   D45        2.87329   0.00037   0.00000   0.01582   0.01582   2.88911
   D46        3.13555  -0.00010   0.00000  -0.00274  -0.00274   3.13281
   D47       -0.00819  -0.00001   0.00000  -0.00034  -0.00035  -0.00853
   D48        0.01422  -0.00006   0.00000  -0.00154  -0.00154   0.01268
   D49       -3.12951   0.00004   0.00000   0.00086   0.00085  -3.12866
   D50       -3.12378   0.00010   0.00000   0.00282   0.00282  -3.12096
   D51       -0.00610   0.00005   0.00000   0.00134   0.00134  -0.00476
   D52       -0.00377   0.00006   0.00000   0.00157   0.00157  -0.00220
   D53        3.11391   0.00001   0.00000   0.00009   0.00009   3.11401
   D54       -0.01357   0.00003   0.00000   0.00067   0.00067  -0.01290
   D55        3.12931   0.00001   0.00000   0.00021   0.00021   3.12952
   D56        3.13019  -0.00006   0.00000  -0.00175  -0.00176   3.12844
   D57       -0.01011  -0.00008   0.00000  -0.00221  -0.00222  -0.01233
   D58        0.00227   0.00001   0.00000   0.00023   0.00023   0.00250
   D59       -3.14040  -0.00001   0.00000  -0.00043  -0.00043  -3.14083
   D60       -3.14064   0.00003   0.00000   0.00071   0.00071  -3.13993
   D61       -0.00012   0.00000   0.00000   0.00004   0.00004  -0.00008
   D62        0.00789  -0.00001   0.00000  -0.00018  -0.00018   0.00771
   D63       -3.13254   0.00002   0.00000   0.00061   0.00061  -3.13193
   D64       -3.13272   0.00002   0.00000   0.00043   0.00043  -3.13228
   D65        0.01004   0.00005   0.00000   0.00122   0.00122   0.01126
   D66        0.03440  -0.00003   0.00000  -0.00076  -0.00076   0.03364
   D67       -3.10824  -0.00006   0.00000  -0.00140  -0.00140  -3.10964
   D68       -0.00713  -0.00003   0.00000  -0.00074  -0.00074  -0.00787
   D69       -3.12540   0.00004   0.00000   0.00081   0.00081  -3.12459
   D70        3.13327  -0.00006   0.00000  -0.00155  -0.00155   3.13171
   D71        0.01499   0.00001   0.00000   0.00000   0.00000   0.01500
   D72        3.09729  -0.00010   0.00000  -0.00363  -0.00365   3.09364
   D73        0.99409  -0.00032   0.00000  -0.00461  -0.00461   0.98948
   D74       -1.07586   0.00021   0.00000   0.00136   0.00138  -1.07448
   D75       -0.79072   0.00036   0.00000   0.00692   0.00692  -0.78380
   D76        2.38829   0.00033   0.00000   0.00622   0.00622   2.39450
   D77        1.30517   0.00047   0.00000   0.00820   0.00820   1.31337
   D78       -1.79900   0.00044   0.00000   0.00750   0.00749  -1.79150
   D79       -2.90093  -0.00055   0.00000  -0.00320  -0.00320  -2.90413
   D80        0.27808  -0.00058   0.00000  -0.00390  -0.00390   0.27418
   D81       -3.10510  -0.00002   0.00000  -0.00063  -0.00063  -3.10573
   D82        0.04777   0.00006   0.00000   0.00169   0.00169   0.04946
   D83       -0.00049   0.00000   0.00000   0.00004   0.00004  -0.00045
   D84       -3.13080   0.00008   0.00000   0.00236   0.00236  -3.12844
   D85        3.09940  -0.00005   0.00000  -0.00105  -0.00105   3.09835
   D86       -0.04718   0.00001   0.00000   0.00046   0.00045  -0.04672
   D87       -0.00537  -0.00006   0.00000  -0.00169  -0.00169  -0.00706
   D88        3.13124   0.00000   0.00000  -0.00018  -0.00019   3.13105
   D89        0.00521   0.00006   0.00000   0.00144   0.00144   0.00664
   D90       -3.13718   0.00004   0.00000   0.00091   0.00091  -3.13626
   D91        3.13547  -0.00004   0.00000  -0.00093  -0.00093   3.13453
   D92       -0.00692  -0.00006   0.00000  -0.00145  -0.00146  -0.00838
   D93       -0.00407  -0.00005   0.00000  -0.00127  -0.00127  -0.00534
   D94        3.14113  -0.00003   0.00000  -0.00070  -0.00070   3.14043
   D95        3.13832  -0.00003   0.00000  -0.00075  -0.00075   3.13757
   D96        0.00034  -0.00001   0.00000  -0.00018  -0.00018   0.00016
   D97       -0.00176  -0.00001   0.00000  -0.00037  -0.00037  -0.00213
   D98       -3.13527   0.00004   0.00000   0.00099   0.00099  -3.13428
   D99        3.13622  -0.00004   0.00000  -0.00094  -0.00094   3.13528
   D100       0.00271   0.00002   0.00000   0.00042   0.00042   0.00313
   D101       0.00652   0.00007   0.00000   0.00186   0.00186   0.00838
   D102      -3.13011   0.00001   0.00000   0.00037   0.00037  -3.12974
   D103       3.14006   0.00002   0.00000   0.00051   0.00051   3.14057
   D104       0.00343  -0.00004   0.00000  -0.00098  -0.00098   0.00246
   D105       2.39418   0.00033   0.00000   0.00553   0.00553   2.39971
   D106      -0.78532   0.00036   0.00000   0.00659   0.00659  -0.77872
   D107      -1.79318   0.00042   0.00000   0.00665   0.00664  -1.78654
   D108       1.31051   0.00046   0.00000   0.00771   0.00770   1.31822
   D109       0.28419  -0.00061   0.00000  -0.00492  -0.00491   0.27928
   D110      -2.89530  -0.00058   0.00000  -0.00386  -0.00385  -2.89916
   D111       3.09891  -0.00003   0.00000  -0.00057  -0.00057   3.09834
   D112      -0.04755   0.00002   0.00000   0.00072   0.00072  -0.04683
   D113      -0.00539  -0.00005   0.00000  -0.00155  -0.00155  -0.00694
   D114       3.13133   0.00000   0.00000  -0.00026  -0.00027   3.13107
   D115      -3.10458  -0.00003   0.00000  -0.00089  -0.00089  -3.10547
   D116       0.04825   0.00006   0.00000   0.00158   0.00158   0.04983
   D117      -0.00045   0.00000   0.00000   0.00015   0.00015  -0.00030
   D118      -3.13081   0.00009   0.00000   0.00262   0.00262  -3.12819
   D119       0.00653   0.00006   0.00000   0.00160   0.00160   0.00813
   D120       3.14011   0.00001   0.00000   0.00039   0.00040   3.14050
   D121      -3.13021   0.00001   0.00000   0.00033   0.00033  -3.12988
   D122       0.00336  -0.00003   0.00000  -0.00087  -0.00087   0.00249
   D123      -0.00177  -0.00001   0.00000  -0.00023  -0.00023  -0.00200
   D124       3.13623  -0.00003   0.00000  -0.00081  -0.00081   3.13542
   D125      -3.13531   0.00004   0.00000   0.00098   0.00098  -3.13433
   D126       0.00269   0.00001   0.00000   0.00040   0.00040   0.00309
   D127      -0.00404  -0.00004   0.00000  -0.00117  -0.00117  -0.00521
   D128       3.13836  -0.00003   0.00000  -0.00085  -0.00085   3.13751
   D129       3.14114  -0.00002   0.00000  -0.00059  -0.00059   3.14055
   D130       0.00036  -0.00001   0.00000  -0.00027  -0.00027   0.00009
   D131       0.00517   0.00005   0.00000   0.00121   0.00121   0.00638
   D132       3.13547  -0.00005   0.00000  -0.00131  -0.00131   3.13416
   D133      -3.13723   0.00004   0.00000   0.00089   0.00089  -3.13634
   D134      -0.00693  -0.00006   0.00000  -0.00163  -0.00163  -0.00856
         Item               Value     Threshold  Converged?
 Maximum Force            0.046252     0.000450     NO 
 RMS     Force            0.005293     0.000300     NO 
 Maximum Displacement     0.194875     0.001800     NO 
 RMS     Displacement     0.046447     0.001200     NO 
 Predicted change in Energy=-7.783495D-03
 GradGradGradGradGradGradGradGradGradGradGradGradGradGradGradGradGradGrad

 Stoichiometry    C29H24O3
 Framework group  C1[X(C29H24O3)]
 Deg. of freedom   162
 Full point group                 C1      NOp   1
 Largest Abelian subgroup         C1      NOp   1
 Largest concise Abelian subgroup C1      NOp   1
                         Standard orientation:                         
 ---------------------------------------------------------------------
 Center     Atomic     Atomic              Coordinates (Angstroms)
 Number     Number      Type              X           Y           Z
 ---------------------------------------------------------------------
    1          6             0        2.756630   -0.098219    0.175016
    2          6             0        4.027946   -0.643139    0.184229
    3          6             0        5.155246    0.174675   -0.031803
    4          6             0        4.978400    1.544723   -0.256323
    5          6             0        3.687087    2.078353   -0.260862
    6          6             0        2.552490    1.282153   -0.049773
    7          8             0        6.357031   -0.456671   -0.006137
    8          6             0        1.230865    1.909336   -0.070515
    9          6             0        0.027439    1.317402    0.061072
   10          6             0       -1.216898    2.138627    0.028899
   11          6             0       -2.538397    1.426020    0.025133
   12          6             0       -3.691645    2.176235    0.288789
   13          6             0       -4.957467    1.593580    0.293953
   14          6             0       -5.089923    0.224544    0.013935
   15          6             0       -3.943755   -0.539734   -0.264676
   16          6             0       -2.689672    0.054574   -0.253539
   17          8             0       -6.270238   -0.445596   -0.009331
   18          6             0        7.545378    0.306261   -0.182967
   19          6             0        8.745063   -0.605023   -0.053328
   20          6             0        8.817422   -1.545633    0.983204
   21          6             0        9.944640   -2.354014    1.123505
   22          6             0       11.017053   -2.227338    0.234841
   23          6             0       10.951777   -1.291982   -0.797998
   24          6             0        9.817330   -0.488435   -0.942822
   25          8             0       -1.173363    3.363648    0.016263
   26          6             0       -7.481476    0.264998    0.223722
   27          6             0       -8.648981   -0.684917    0.078094
   28          6             0       -9.709053   -0.643150    0.988710
   29          6             0      -10.815473   -1.482552    0.830833
   30          6             0      -10.864625   -2.378982   -0.236887
   31          6             0       -9.804164   -2.430721   -1.147063
   32          6             0       -8.705099   -1.586823   -0.993237
   33          1             0        1.906658   -0.750967    0.348172
   34          1             0        4.186012   -1.702510    0.356984
   35          1             0        5.823856    2.200107   -0.427891
   36          1             0        3.562194    3.143743   -0.435125
   37          1             0        1.224410    2.989307   -0.210356
   38          1             0       -0.061958    0.246741    0.210544
   39          1             0       -3.578512    3.235974    0.491772
   40          1             0       -5.823816    2.206155    0.513601
   41          1             0       -4.066790   -1.594244   -0.487723
   42          1             0       -1.825564   -0.558247   -0.488364
   43          1             0        7.587767    1.098973    0.578993
   44          1             0        7.547009    0.793664   -1.167025
   45          1             0        7.982324   -1.648509    1.668993
   46          1             0        9.988365   -3.083245    1.927362
   47          1             0       11.894672   -2.857305    0.346563
   48          1             0       11.776752   -1.191037   -1.497154
   49          1             0        9.767752    0.231039   -1.756466
   50          1             0       -7.569454    1.086798   -0.502413
   51          1             0       -7.480715    0.709643    1.227680
   52          1             0       -9.671651    0.045677    1.829101
   53          1             0      -11.631109   -1.439721    1.546746
   54          1             0      -11.720319   -3.036584   -0.359087
   55          1             0       -9.835159   -3.129374   -1.978230
   56          1             0       -7.878985   -1.632015   -1.695907
 ---------------------------------------------------------------------
 Rotational constants (GHZ):      0.4414199      0.0246243      0.0236094
 Standard basis: 6-31G(d,p) (6D, 7F)
 There are   600 symmetry adapted basis functions of A   symmetry.
 Integral buffers will be    262144 words long.
 Raffenetti 2 integral format.
 Two-electron integral symmetry is turned on.
   600 basis functions,  1064 primitive gaussians,   600 cartesian basis functions
   111 alpha electrons      111 beta electrons
       nuclear repulsion energy      2501.0209330345 Hartrees.
 NAtoms=   56 NActive=   56 NUniq=   56 SFac= 1.00D+00 NAtFMM=   60 Big=F
 One-electron integrals computed using PRISM.
 NBasis=   600 RedAO= T  NBF=   600
 NBsUse=   600 1.00D-06 NBFU=   600
 Initial guess read from the read-write file:
 Initial guess orbital symmetries:
       Occupied  (A) (A) (A) (A) (A) (A) (A) (A) (A) (A) (A) (A)
                 (A) (A) (A) (A) (A) (A) (A) (A) (A) (A) (A) (A)
                 (A) (A) (A) (A) (A) (A) (A) (A) (A) (A) (A) (A)
                 (A) (A) (A) (A) (A) (A) (A) (A) (A) (A) (A) (A)
                 (A) (A) (A) (A) (A) (A) (A) (A) (A) (A) (A) (A)
                 (A) (A) (A) (A) (A) (A) (A) (A) (A) (A) (A) (A)
                 (A) (A) (A) (A) (A) (A) (A) (A) (A) (A) (A) (A)
                 (A) (A) (A) (A) (A) (A) (A) (A) (A) (A) (A) (A)
                 (A) (A) (A) (A) (A) (A) (A) (A) (A) (A) (A) (A)
                 (A) (A) (A)
       Virtual   (A) (A) (A) (A) (A) (A) (A) (A) (A) (A) (A) (A)
                 (A) (A) (A) (A) (A) (A) (A) (A) (A) (A) (A) (A)
                 (A) (A) (A) (A) (A) (A) (A) (A) (A) (A) (A) (A)
                 (A) (A) (A) (A) (A) (A) (A) (A) (A) (A) (A) (A)
                 (A) (A) (A) (A) (A) (A) (A) (A) (A) (A) (A) (A)
                 (A) (A) (A) (A) (A) (A) (A) (A) (A) (A) (A) (A)
                 (A) (A) (A) (A) (A) (A) (A) (A) (A) (A) (A) (A)
                 (A) (A) (A) (A) (A) (A) (A) (A) (A) (A) (A) (A)
                 (A) (A) (A) (A) (A) (A) (A) (A) (A) (A) (A) (A)
                 (A) (A) (A) (A) (A) (A) (A) (A) (A) (A) (A) (A)
                 (A) (A) (A) (A) (A) (A) (A) (A) (A) (A) (A) (A)
                 (A) (A) (A) (A) (A) (A) (A) (A) (A) (A) (A) (A)
                 (A) (A) (A) (A) (A) (A) (A) (A) (A) (A) (A) (A)
                 (A) (A) (A) (A) (A) (A) (A) (A) (A) (A) (A) (A)
                 (A) (A) (A) (A) (A) (A) (A) (A) (A) (A) (A) (A)
                 (A) (A) (A) (A) (A) (A) (A) (A) (A) (A) (A) (A)
                 (A) (A) (A) (A) (A) (A) (A) (A) (A) (A) (A) (A)
                 (A) (A) (A) (A) (A) (A) (A) (A) (A) (A) (A) (A)
                 (A) (A) (A) (A) (A) (A) (A) (A) (A) (A) (A) (A)
                 (A) (A) (A) (A) (A) (A) (A) (A) (A) (A) (A) (A)
                 (A) (A) (A) (A) (A) (A) (A) (A) (A) (A) (A) (A)
                 (A) (A) (A) (A) (A) (A) (A) (A) (A) (A) (A) (A)
                 (A) (A) (A) (A) (A) (A) (A) (A) (A) (A) (A) (A)
                 (A) (A) (A) (A) (A) (A) (A) (A) (A) (A) (A) (A)
                 (A) (A) (A) (A) (A) (A) (A) (A) (A) (A) (A) (A)
                 (A) (A) (A) (A) (A) (A) (A) (A) (A) (A) (A) (A)
                 (A) (A) (A) (A) (A) (A) (A) (A) (A) (A) (A) (A)
                 (A) (A) (A) (A) (A) (A) (A) (A) (A) (A) (A) (A)
                 (A) (A) (A) (A) (A) (A) (A) (A) (A) (A) (A) (A)
                 (A) (A) (A) (A) (A) (A) (A) (A) (A) (A) (A) (A)
                 (A) (A) (A) (A) (A) (A) (A) (A) (A) (A) (A) (A)
                 (A) (A) (A) (A) (A) (A) (A) (A) (A) (A) (A) (A)
                 (A) (A) (A) (A) (A) (A) (A) (A) (A) (A) (A) (A)
                 (A) (A) (A) (A) (A) (A) (A) (A) (A) (A) (A) (A)
                 (A) (A) (A) (A) (A) (A) (A) (A) (A) (A) (A) (A)
                 (A) (A) (A) (A) (A) (A) (A) (A) (A) (A) (A) (A)
                 (A) (A) (A) (A) (A) (A) (A) (A) (A) (A) (A) (A)
                 (A) (A) (A) (A) (A) (A) (A) (A) (A) (A) (A) (A)
                 (A) (A) (A) (A) (A) (A) (A) (A) (A) (A) (A) (A)
                 (A) (A) (A) (A) (A) (A) (A) (A) (A) (A) (A) (A)
                 (A) (A) (A) (A) (A) (A) (A) (A) (A)
 Harris functional with IExCor=  402 diagonalized for initial guess.
 ExpMin= 1.61D-01 ExpMax= 5.48D+03 ExpMxC= 8.25D+02 IAcc=1 IRadAn=         1 AccDes= 1.00D-06
 HarFok:  IExCor= 402 AccDes= 1.00D-06 IRadAn=         1 IDoV=1
 ScaDFX=  1.000000  1.000000  1.000000  1.000000
 Requested convergence on RMS density matrix=1.00D-08 within 128 cycles.
 Requested convergence on MAX density matrix=1.00D-06.
 Requested convergence on             energy=1.00D-06.
 No special actions if energy rises.
 Integral accuracy reduced to 1.0D-05 until final iterations.
 Initial convergence to 1.0D-05 achieved.  Increase integral accuracy.
 SCF Done:  E(RB+HF-LYP) =  -1345.22795340     A.U. after   12 cycles
             Convg  =    0.7299D-08             -V/T =  2.0096
             S**2   =   0.0000
 ***** Axes restored to original set *****
 -------------------------------------------------------------------
 Center     Atomic                   Forces (Hartrees/Bohr)
 Number     Number              X              Y              Z
 -------------------------------------------------------------------
    1          6           0.000693690   -0.000073295    0.001111706
    2          6           0.001039996    0.000015387    0.000615364
    3          6           0.000359022    0.000092122   -0.003259432
    4          6           0.000241396    0.000021454   -0.002403213
    5          6           0.000641627    0.000074921    0.003193318
    6          6          -0.001317688   -0.000008621   -0.003756208
    7          8          -0.004346104   -0.000229257    0.001121368
    8          6           0.000607507    0.000311946    0.004634788
    9          6           0.000915232    0.000081655   -0.004666300
   10          6          -0.009658952   -0.002113127    0.005321180
   11          6           0.001555684    0.000461614    0.001294986
   12          6          -0.001272073   -0.000476903   -0.001621271
   13          6           0.000980700    0.000075602    0.001174531
   14          6           0.003461338    0.000901333    0.001561391
   15          6           0.000355425    0.000364390   -0.000903799
   16          6          -0.000398534    0.000242448   -0.000750177
   17          8          -0.003814203   -0.001625917    0.002221232
   18          6           0.003429141    0.000229642    0.003541743
   19          6          -0.000873558    0.000305097   -0.001030239
   20          6           0.000325113   -0.000333551    0.000519026
   21          6           0.000692463   -0.000687040    0.000163450
   22          6          -0.000131717    0.000273575   -0.000986390
   23          6          -0.000079920    0.000424402   -0.001001380
   24          6          -0.000409297    0.000125163    0.001005153
   25          8           0.006052200    0.001379046   -0.002594103
   26          6          -0.000312490    0.000504120   -0.004601730
   27          6           0.000311102   -0.000427499    0.001195808
   28          6          -0.000943786   -0.000419040   -0.000388551
   29          6           0.000817063   -0.000280085    0.000659421
   30          6           0.000726098   -0.000145464    0.000713885
   31          6           0.000056239    0.000858023   -0.000480371
   32          6          -0.000298050    0.000326281   -0.000523356
   33          1           0.000222918   -0.000009338    0.000017789
   34          1           0.000022504    0.000022220    0.000058700
   35          1          -0.000257426   -0.000028141    0.000057536
   36          1          -0.000246191   -0.000011699   -0.000286366
   37          1          -0.000265715   -0.000103090   -0.000936341
   38          1           0.000558088   -0.000045303    0.000248755
   39          1           0.000130084   -0.000086181    0.000502925
   40          1          -0.000188473   -0.000038694    0.000107728
   41          1          -0.000020659   -0.000008801   -0.000025691
   42          1          -0.000057322   -0.000095795   -0.000493756
   43          1          -0.000071946    0.000106317   -0.000596095
   44          1          -0.000184824   -0.000149316   -0.000567842
   45          1           0.000096321   -0.000162099   -0.000082587
   46          1           0.000035457   -0.000035087   -0.000017817
   47          1           0.000039848   -0.000019729   -0.000038199
   48          1          -0.000056348    0.000034883   -0.000007668
   49          1          -0.000067207    0.000034849   -0.000152328
   50          1           0.000443638   -0.000020380    0.000420161
   51          1           0.000257567    0.000160635    0.000519359
   52          1           0.000099788   -0.000044264    0.000146487
   53          1          -0.000016758   -0.000047423    0.000038504
   54          1           0.000041484    0.000043275   -0.000001622
   55          1           0.000017983    0.000045671   -0.000008978
   56          1           0.000062526    0.000209070    0.000015514
 -------------------------------------------------------------------
 Cartesian Forces:  Max     0.009658952 RMS     0.001535001

 GradGradGradGradGradGradGradGradGradGradGradGradGradGradGradGradGradGrad
 Berny optimization.
 Internal  Forces:  Max     0.006719306 RMS     0.000758879
 Search for a local minimum.
 Step number   2 out of a maximum of 298
 All quantities printed in internal units (Hartrees-Bohrs-Radians)
 Update second derivatives using D2CorX and points  1  2
 Trust test= 9.62D-01 RLast= 1.85D-01 DXMaxT set to 4.24D-01
     Eigenvalues ---    0.00652   0.00652   0.00825   0.00883   0.00940
     Eigenvalues ---    0.01177   0.01601   0.01602   0.01603   0.01608
     Eigenvalues ---    0.01763   0.01854   0.02010   0.02104   0.02151
     Eigenvalues ---    0.02190   0.02219   0.02227   0.02239   0.02240
     Eigenvalues ---    0.02251   0.02255   0.02258   0.02262   0.02263
     Eigenvalues ---    0.02263   0.02265   0.02267   0.02267   0.02268
     Eigenvalues ---    0.02273   0.02273   0.02273   0.02278   0.02280
     Eigenvalues ---    0.02280   0.02287   0.02287   0.02289   0.02292
     Eigenvalues ---    0.02294   0.02294   0.02302   0.02302   0.02324
     Eigenvalues ---    0.02352   0.02421   0.02434   0.03020   0.06416
     Eigenvalues ---    0.06424   0.07413   0.07435   0.11454   0.11466
     Eigenvalues ---    0.13937   0.13943   0.15947   0.15996   0.15998
     Eigenvalues ---    0.15999   0.15999   0.15999   0.15999   0.16000
     Eigenvalues ---    0.16000   0.16000   0.16000   0.16000   0.16000
     Eigenvalues ---    0.16000   0.16000   0.16000   0.16000   0.16000
     Eigenvalues ---    0.16000   0.16012   0.21988   0.22000   0.22000
     Eigenvalues ---    0.22000   0.22000   0.22000   0.22000   0.22009
     Eigenvalues ---    0.22023   0.22026   0.22961   0.22971   0.23471
     Eigenvalues ---    0.23473   0.23998   0.24000   0.24641   0.24983
     Eigenvalues ---    0.24983   0.24994   0.24999   0.25000   0.25000
     Eigenvalues ---    0.25000   0.25000   0.25179   0.31488   0.31495
     Eigenvalues ---    0.32831   0.33541   0.35123   0.35151   0.35343
     Eigenvalues ---    0.35360   0.35650   0.36388   0.36390   0.36410
     Eigenvalues ---    0.36466   0.36504   0.36509   0.36516   0.36518
     Eigenvalues ---    0.36520   0.36575   0.36630   0.36648   0.36685
     Eigenvalues ---    0.36711   0.36729   0.36777   0.36854   0.36926
     Eigenvalues ---    0.36930   0.37587   0.42581   0.42959   0.43105
     Eigenvalues ---    0.43399   0.43401   0.43445   0.43487   0.43493
     Eigenvalues ---    0.43707   0.44544   0.46498   0.46973   0.47238
     Eigenvalues ---    0.47273   0.47516   0.47679   0.47787   0.47894
     Eigenvalues ---    0.47908   0.48137   0.48172   0.48219   0.48533
     Eigenvalues ---    0.49060   0.49761   0.52783   0.55590   0.56244
     Eigenvalues ---    0.59620   0.999771000.000001000.000001000.00000
     Eigenvalues --- 1000.000001000.000001000.000001000.000001000.00000
     Eigenvalues --- 1000.000001000.000001000.000001000.000001000.00000
     Eigenvalues --- 1000.000001000.000001000.000001000.000001000.00000
     Eigenvalues --- 1000.000001000.000001000.000001000.000001000.00000
     Eigenvalues --- 1000.000001000.000001000.000001000.000001000.00000
     Eigenvalues --- 1000.000001000.000001000.000001000.000001000.00000
     Eigenvalues --- 1000.000001000.000001000.000001000.000001000.00000
     Eigenvalues --- 1000.000001000.000001000.000001000.000001000.00000
     Eigenvalues --- 1000.000001000.000001000.000001000.000001000.00000
     Eigenvalues --- 1000.000001000.000001000.000001000.000001000.00000
     Eigenvalues --- 1000.000001000.000001000.000001000.000001000.00000
     Eigenvalues --- 1000.000001000.000001000.000001000.000001000.00000
     Eigenvalues --- 1000.000001000.000001000.000001000.000001000.00000
     Eigenvalues --- 1000.000001000.000001000.000001000.000001000.00000
     Eigenvalues --- 1000.000001000.000001000.000001000.000001000.00000
     Eigenvalues --- 1000.000001000.000001000.000001000.000001000.00000
     Eigenvalues --- 1000.000001000.000001000.000001000.000001000.00000
     Eigenvalues --- 1000.000001000.000001000.000001000.000001000.00000
     Eigenvalues --- 1000.000001000.000001000.000001000.000001000.00000
     Eigenvalues --- 1000.000001000.000001000.000001000.000001000.00000
     Eigenvalues --- 1000.000001000.000001000.000001000.000001000.00000
     Eigenvalues --- 1000.000001000.000001000.000001000.000001000.00000
     Eigenvalues --- 1000.000001000.000001000.000001000.000001000.00000
     Eigenvalues --- 1000.000001000.000001000.000001000.000001000.00000
     Eigenvalues --- 1000.000001000.000001000.00000
 RFO step:  Lambda=-4.82075420D-04.
 Quartic linear search produced a step of  0.00795.
 Iteration  1 RMS(Cart)=  0.05953120 RMS(Int)=  0.00046891
 Iteration  2 RMS(Cart)=  0.00106839 RMS(Int)=  0.00000822
 Iteration  3 RMS(Cart)=  0.00000049 RMS(Int)=  0.00000821
 Variable       Old X    -DE/DX   Delta X   Delta X   Delta X     New X
                                 (Linear)    (Quad)   (Total)
    R1        2.61389  -0.00080   0.00018  -0.00111  -0.00094   2.61295
    R2        2.67089  -0.00044   0.00017  -0.00042  -0.00025   2.67064
    R3        2.05148  -0.00020   0.00017  -0.00010   0.00006   2.05154
    R4        2.66331  -0.00185   0.00018  -0.00365  -0.00346   2.65984
    R5        2.05024   0.00001   0.00016   0.00047   0.00063   2.05087
    R6        2.64475   0.00001   0.00023   0.00059   0.00082   2.64557
    R7        2.56582   0.00201   0.00019   0.00413   0.00432   2.57014
    R8        2.64039  -0.00226   0.00012  -0.00444  -0.00432   2.63607
    R9        2.04733  -0.00020   0.00017  -0.00008   0.00008   2.04741
   R10        2.64953   0.00070   0.00024   0.00220   0.00244   2.65198
   R11        2.05366  -0.00008   0.00016   0.00022   0.00038   2.05404
   R12        2.76474  -0.00277  -0.00009  -0.00801  -0.00810   2.75664
   R13        2.68946   0.00269   0.00025   0.00677   0.00703   2.69649
   R14        2.54653   0.00072   0.00027   0.00195   0.00222   2.54875
   R15        2.05792   0.00011   0.00018   0.00081   0.00100   2.05892
   R16        2.81805  -0.00375   0.00007  -0.01097  -0.01091   2.80714
   R17        2.04985  -0.00045   0.00019  -0.00073  -0.00054   2.04931
   R18        2.83722  -0.00208   0.00009  -0.00613  -0.00604   2.83118
   R19        2.31654   0.00672   0.00035   0.00749   0.00784   2.32438
   R20        2.64718  -0.00006   0.00019   0.00045   0.00064   2.64782
   R21        2.66002  -0.00047   0.00018  -0.00047  -0.00030   2.65973
   R22        2.63332  -0.00179   0.00014  -0.00333  -0.00319   2.63013
   R23        2.05020  -0.00006   0.00017   0.00031   0.00049   2.05069
   R24        2.65250  -0.00062   0.00021  -0.00080  -0.00059   2.65191
   R25        2.04759  -0.00014   0.00017   0.00006   0.00023   2.04782
   R26        2.65602  -0.00156   0.00019  -0.00289  -0.00270   2.65332
   R27        2.56528   0.00216   0.00020   0.00442   0.00462   2.56990
   R28        2.62260  -0.00099   0.00017  -0.00152  -0.00135   2.62126
   R29        2.05005   0.00001   0.00016   0.00048   0.00065   2.05070
   R30        2.05048  -0.00043   0.00017  -0.00073  -0.00056   2.04992
   R31        2.69003   0.00251   0.00025   0.00637   0.00662   2.69664
   R32        2.85748  -0.00146   0.00005  -0.00452  -0.00447   2.85301
   R33        2.07936   0.00019   0.00019   0.00107   0.00127   2.08063
   R34        2.07520   0.00011   0.00019   0.00084   0.00103   2.07623
   R35        2.64857  -0.00090   0.00016  -0.00145  -0.00129   2.64728
   R36        2.64194  -0.00048   0.00018  -0.00050  -0.00032   2.64162
   R37        2.63465  -0.00069   0.00018  -0.00094  -0.00076   2.63389
   R38        2.05127  -0.00008   0.00016   0.00021   0.00037   2.05164
   R39        2.64281  -0.00113   0.00016  -0.00196  -0.00180   2.64101
   R40        2.05266  -0.00005   0.00016   0.00028   0.00044   2.05309
   R41        2.63609  -0.00060   0.00019  -0.00077  -0.00058   2.63551
   R42        2.05238  -0.00005   0.00016   0.00029   0.00045   2.05283
   R43        2.64131  -0.00126   0.00016  -0.00224  -0.00209   2.63923
   R44        2.05241  -0.00005   0.00016   0.00028   0.00044   2.05285
   R45        2.05461  -0.00002   0.00016   0.00037   0.00052   2.05513
   R46        2.85756  -0.00141   0.00005  -0.00437  -0.00432   2.85325
   R47        2.07901   0.00020   0.00020   0.00111   0.00130   2.08032
   R48        2.07495   0.00013   0.00019   0.00089   0.00108   2.07603
   R49        2.64205  -0.00051   0.00018  -0.00055  -0.00037   2.64168
   R50        2.64854  -0.00089   0.00016  -0.00142  -0.00126   2.64728
   R51        2.64135  -0.00125   0.00016  -0.00223  -0.00207   2.63928
   R52        2.05463  -0.00003   0.00016   0.00036   0.00052   2.05515
   R53        2.63617  -0.00061   0.00019  -0.00077  -0.00059   2.63558
   R54        2.05244  -0.00005   0.00016   0.00029   0.00045   2.05289
   R55        2.64270  -0.00112   0.00016  -0.00194  -0.00178   2.64092
   R56        2.05241  -0.00005   0.00016   0.00030   0.00046   2.05287
   R57        2.63464  -0.00068   0.00018  -0.00093  -0.00075   2.63389
   R58        2.05269  -0.00005   0.00016   0.00029   0.00045   2.05314
   R59        2.05125  -0.00009   0.00016   0.00020   0.00036   2.05160
    A1        2.11597   0.00024  -0.00001   0.00122   0.00121   2.11718
    A2        2.07337  -0.00002   0.00003   0.00007   0.00010   2.07347
    A3        2.09384  -0.00022  -0.00003  -0.00129  -0.00131   2.09253
    A4        2.10080  -0.00017   0.00000  -0.00096  -0.00096   2.09985
    A5        2.11722   0.00015   0.00001   0.00091   0.00092   2.11814
    A6        2.06516   0.00002  -0.00001   0.00006   0.00004   2.06520
    A7        2.08468   0.00042  -0.00001   0.00135   0.00135   2.08603
    A8        2.02112  -0.00102   0.00003  -0.00388  -0.00385   2.01727
    A9        2.17738   0.00060  -0.00002   0.00252   0.00250   2.17988
   A10        2.08423  -0.00007   0.00001  -0.00046  -0.00045   2.08378
   A11        2.11645  -0.00014  -0.00003  -0.00096  -0.00099   2.11547
   A12        2.08250   0.00022   0.00002   0.00142   0.00143   2.08393
   A13        2.13000   0.00011  -0.00002   0.00064   0.00062   2.13062
   A14        2.07276   0.00033   0.00003   0.00213   0.00216   2.07492
   A15        2.08043  -0.00043  -0.00001  -0.00277  -0.00278   2.07765
   A16        2.05068  -0.00053   0.00001  -0.00179  -0.00177   2.04891
   A17        2.15484   0.00072  -0.00003   0.00266   0.00263   2.15747
   A18        2.07766  -0.00019   0.00002  -0.00087  -0.00086   2.07680
   A19        2.07995  -0.00203  -0.00013  -0.00852  -0.00865   2.07130
   A20        2.23576   0.00065   0.00001   0.00300   0.00300   2.23876
   A21        2.01784   0.00067   0.00001   0.00479   0.00479   2.02264
   A22        2.02958  -0.00132  -0.00001  -0.00778  -0.00780   2.02179
   A23        2.09574  -0.00060   0.00004  -0.00265  -0.00261   2.09313
   A24        2.11837  -0.00012  -0.00002  -0.00136  -0.00138   2.11699
   A25        2.06890   0.00072  -0.00002   0.00391   0.00389   2.07279
   A26        2.06363   0.00285  -0.00011   0.01112   0.01094   2.07457
   A27        2.11871  -0.00114   0.00005  -0.00451  -0.00453   2.11418
   A28        2.10080  -0.00172   0.00006  -0.00680  -0.00680   2.09400
   A29        2.06004  -0.00125   0.00000  -0.00519  -0.00519   2.05485
   A30        2.16219   0.00144  -0.00002   0.00560   0.00558   2.16777
   A31        2.06074  -0.00020   0.00001  -0.00048  -0.00047   2.06027
   A32        2.12305   0.00015  -0.00001   0.00079   0.00078   2.12383
   A33        2.06291  -0.00061  -0.00004  -0.00387  -0.00391   2.05900
   A34        2.09723   0.00046   0.00005   0.00308   0.00313   2.10036
   A35        2.08610  -0.00027   0.00002  -0.00133  -0.00132   2.08478
   A36        2.08365   0.00030   0.00001   0.00176   0.00177   2.08542
   A37        2.11344  -0.00003  -0.00003  -0.00042  -0.00045   2.11298
   A38        2.08628   0.00049  -0.00002   0.00169   0.00167   2.08795
   A39        2.17361   0.00063  -0.00001   0.00261   0.00260   2.17621
   A40        2.02329  -0.00112   0.00003  -0.00430  -0.00427   2.01903
   A41        2.09722  -0.00004   0.00001  -0.00026  -0.00026   2.09697
   A42        2.06785  -0.00001  -0.00001  -0.00010  -0.00011   2.06774
   A43        2.11811   0.00005   0.00001   0.00036   0.00036   2.11847
   A44        2.11288  -0.00013  -0.00001  -0.00041  -0.00041   2.11247
   A45        2.10310   0.00027  -0.00003   0.00139   0.00136   2.10446
   A46        2.06693  -0.00014   0.00004  -0.00103  -0.00100   2.06593
   A47        2.08357  -0.00239  -0.00012  -0.00997  -0.01009   2.07348
   A48        1.90577  -0.00082   0.00003  -0.00420  -0.00417   1.90160
   A49        1.90956  -0.00020   0.00000  -0.00345  -0.00345   1.90611
   A50        1.92891  -0.00019   0.00006  -0.00324  -0.00318   1.92573
   A51        1.92222   0.00070   0.00000   0.00532   0.00531   1.92753
   A52        1.92104   0.00067  -0.00001   0.00499   0.00497   1.92601
   A53        1.87624  -0.00015  -0.00007   0.00067   0.00057   1.87681
   A54        2.10461   0.00017  -0.00001   0.00058   0.00057   2.10518
   A55        2.09867  -0.00022   0.00000  -0.00094  -0.00094   2.09773
   A56        2.07934   0.00005   0.00001   0.00032   0.00033   2.07967
   A57        2.10051  -0.00006   0.00000  -0.00022  -0.00023   2.10029
   A58        2.08417  -0.00015  -0.00002  -0.00109  -0.00111   2.08306
   A59        2.09842   0.00021   0.00002   0.00130   0.00132   2.09974
   A60        2.09846  -0.00003   0.00000  -0.00018  -0.00018   2.09828
   A61        2.09010   0.00002   0.00000   0.00008   0.00008   2.09019
   A62        2.09462   0.00002   0.00000   0.00010   0.00010   2.09472
   A63        2.08902   0.00010   0.00001   0.00036   0.00037   2.08938
   A64        2.09640  -0.00001   0.00000   0.00004   0.00004   2.09644
   A65        2.09776  -0.00009   0.00000  -0.00041  -0.00041   2.09735
   A66        2.09460   0.00003   0.00000   0.00004   0.00004   2.09464
   A67        2.09833  -0.00005   0.00000  -0.00026  -0.00025   2.09808
   A68        2.09021   0.00003   0.00000   0.00020   0.00020   2.09041
   A69        2.10440  -0.00008  -0.00001  -0.00035  -0.00036   2.10404
   A70        2.09017  -0.00013  -0.00002  -0.00094  -0.00095   2.08922
   A71        2.08861   0.00021   0.00002   0.00129   0.00132   2.08992
   A72        1.90456  -0.00080   0.00002  -0.00407  -0.00404   1.90052
   A73        1.91014  -0.00019   0.00000  -0.00330  -0.00329   1.90684
   A74        1.92970  -0.00019   0.00006  -0.00317  -0.00310   1.92660
   A75        1.92190   0.00069   0.00000   0.00522   0.00520   1.92711
   A76        1.92088   0.00067  -0.00001   0.00499   0.00497   1.92585
   A77        1.87659  -0.00017  -0.00007   0.00042   0.00032   1.87691
   A78        2.09892  -0.00019   0.00001  -0.00082  -0.00082   2.09810
   A79        2.10455   0.00014  -0.00001   0.00049   0.00047   2.10503
   A80        2.07914   0.00005   0.00001   0.00031   0.00032   2.07945
   A81        2.10445  -0.00007  -0.00001  -0.00033  -0.00034   2.10411
   A82        2.09010  -0.00015  -0.00002  -0.00104  -0.00106   2.08904
   A83        2.08864   0.00022   0.00002   0.00138   0.00140   2.09004
   A84        2.09468   0.00003   0.00000   0.00004   0.00004   2.09472
   A85        2.09015   0.00003   0.00000   0.00020   0.00020   2.09035
   A86        2.09832  -0.00005   0.00000  -0.00026  -0.00025   2.09806
   A87        2.08887   0.00010   0.00000   0.00036   0.00037   2.08923
   A88        2.09781  -0.00009   0.00000  -0.00043  -0.00043   2.09738
   A89        2.09650  -0.00001   0.00000   0.00006   0.00006   2.09656
   A90        2.09854  -0.00004   0.00000  -0.00019  -0.00020   2.09834
   A91        2.09459   0.00002   0.00000   0.00009   0.00009   2.09468
   A92        2.09005   0.00002   0.00000   0.00010   0.00010   2.09016
   A93        2.10066  -0.00006   0.00000  -0.00021  -0.00021   2.10045
   A94        2.08419  -0.00016  -0.00002  -0.00116  -0.00118   2.08301
   A95        2.09825   0.00022   0.00002   0.00136   0.00138   2.09963
    D1        0.00042   0.00000   0.00000  -0.00012  -0.00012   0.00029
    D2        3.14124  -0.00001   0.00000  -0.00037  -0.00037   3.14087
    D3       -3.13741   0.00000   0.00000  -0.00016  -0.00016  -3.13757
    D4        0.00341  -0.00001   0.00000  -0.00041  -0.00041   0.00300
    D5       -0.00175   0.00001   0.00000   0.00022   0.00022  -0.00153
    D6        3.14104   0.00000   0.00000   0.00013   0.00013   3.14117
    D7        3.13604   0.00001   0.00000   0.00026   0.00027   3.13630
    D8       -0.00436   0.00000   0.00000   0.00017   0.00017  -0.00418
    D9       -0.00016   0.00000   0.00000   0.00001   0.00001  -0.00015
   D10       -3.13912   0.00001   0.00001   0.00037   0.00038  -3.13874
   D11       -3.14101   0.00001   0.00000   0.00025   0.00026  -3.14075
   D12        0.00322   0.00001   0.00001   0.00061   0.00062   0.00384
   D13        0.00129   0.00000   0.00000   0.00000  -0.00001   0.00128
   D14       -3.13915   0.00002   0.00000   0.00066   0.00067  -3.13849
   D15        3.13999  -0.00001  -0.00001  -0.00041  -0.00042   3.13957
   D16       -0.00045   0.00001   0.00000   0.00026   0.00025  -0.00020
   D17       -3.11467   0.00006   0.00000   0.00256   0.00256  -3.11211
   D18        0.02972   0.00007   0.00001   0.00295   0.00295   0.03267
   D19       -0.00274   0.00000   0.00000   0.00011   0.00011  -0.00263
   D20        3.14037   0.00001   0.00000   0.00027   0.00028   3.14065
   D21        3.13772  -0.00001   0.00000  -0.00055  -0.00055   3.13717
   D22       -0.00235  -0.00001   0.00000  -0.00038  -0.00038  -0.00274
   D23        0.00293   0.00000   0.00000  -0.00022  -0.00022   0.00271
   D24       -3.13981   0.00000   0.00000  -0.00013  -0.00013  -3.13993
   D25       -3.14019  -0.00001   0.00000  -0.00038  -0.00038  -3.14056
   D26        0.00026  -0.00001   0.00000  -0.00029  -0.00029  -0.00003
   D27       -0.04667   0.00009   0.00004   0.00726   0.00731  -0.03936
   D28        3.09533   0.00009   0.00002   0.00765   0.00767   3.10300
   D29        3.09614   0.00008   0.00004   0.00717   0.00721   3.10335
   D30       -0.04504   0.00009   0.00002   0.00756   0.00758  -0.03746
   D31        3.09795   0.00001  -0.00002   0.00007   0.00006   3.09801
   D32        0.99302  -0.00022  -0.00003  -0.00175  -0.00178   0.99124
   D33       -1.06968   0.00020   0.00002   0.00149   0.00152  -1.06816
   D34        3.12838  -0.00002   0.00000  -0.00164  -0.00164   3.12674
   D35        0.00734   0.00007   0.00000   0.00340   0.00339   0.01073
   D36       -0.01362  -0.00003   0.00002  -0.00203  -0.00201  -0.01563
   D37       -3.13466   0.00007   0.00002   0.00301   0.00303  -3.13163
   D38        3.02464   0.00034   0.00009   0.03307   0.03316   3.05780
   D39       -0.12679   0.00014   0.00013   0.01099   0.01111  -0.11567
   D40       -0.13693   0.00024   0.00009   0.02811   0.02820  -0.10873
   D41        2.99483   0.00003   0.00012   0.00603   0.00614   3.00098
   D42        2.90220   0.00014   0.00017   0.01466   0.01484   2.91704
   D43       -0.26221   0.00006   0.00016   0.01079   0.01096  -0.25125
   D44       -0.22966   0.00034   0.00014   0.03649   0.03662  -0.19304
   D45        2.88911   0.00027   0.00013   0.03262   0.03274   2.92185
   D46        3.13281   0.00000  -0.00002  -0.00128  -0.00129   3.13151
   D47       -0.00853   0.00000   0.00000  -0.00124  -0.00124  -0.00977
   D48        0.01268   0.00004  -0.00001   0.00227   0.00226   0.01494
   D49       -3.12866   0.00004   0.00001   0.00231   0.00231  -3.12635
   D50       -3.12096   0.00003   0.00002   0.00113   0.00116  -3.11980
   D51       -0.00476  -0.00003   0.00001  -0.00130  -0.00128  -0.00604
   D52       -0.00220  -0.00005   0.00001  -0.00280  -0.00279  -0.00498
   D53        3.11401  -0.00012   0.00000  -0.00523  -0.00523   3.10878
   D54       -0.01290  -0.00001   0.00001  -0.00054  -0.00053  -0.01343
   D55        3.12952  -0.00002   0.00000  -0.00120  -0.00120   3.12832
   D56        3.12844  -0.00001  -0.00001  -0.00058  -0.00059   3.12785
   D57       -0.01233  -0.00002  -0.00002  -0.00124  -0.00126  -0.01359
   D58        0.00250  -0.00002   0.00000  -0.00072  -0.00072   0.00178
   D59       -3.14083   0.00002   0.00000   0.00080   0.00079  -3.14004
   D60       -3.13993   0.00000   0.00001  -0.00004  -0.00004  -3.13997
   D61       -0.00008   0.00004   0.00000   0.00148   0.00148   0.00140
   D62        0.00771   0.00000   0.00000   0.00019   0.00018   0.00790
   D63       -3.13193   0.00004   0.00000   0.00201   0.00201  -3.12992
   D64       -3.13228  -0.00003   0.00000  -0.00121  -0.00121  -3.13349
   D65        0.01126   0.00001   0.00001   0.00061   0.00062   0.01188
   D66        0.03364   0.00005  -0.00001   0.00196   0.00195   0.03559
   D67       -3.10964   0.00008  -0.00001   0.00343   0.00342  -3.10622
   D68       -0.00787   0.00004  -0.00001   0.00162   0.00162  -0.00625
   D69       -3.12459   0.00009   0.00001   0.00397   0.00398  -3.12061
   D70        3.13171  -0.00001  -0.00001  -0.00026  -0.00027   3.13145
   D71        0.01500   0.00005   0.00000   0.00209   0.00209   0.01709
   D72        3.09364  -0.00002  -0.00003  -0.00185  -0.00188   3.09176
   D73        0.98948  -0.00025  -0.00004  -0.00373  -0.00376   0.98571
   D74       -1.07448   0.00018   0.00001  -0.00030  -0.00029  -1.07477
   D75       -0.78380   0.00004   0.00006   0.00624   0.00629  -0.77751
   D76        2.39450   0.00005   0.00005   0.00716   0.00721   2.40172
   D77        1.31337  -0.00029   0.00007   0.00264   0.00269   1.31606
   D78       -1.79150  -0.00028   0.00006   0.00356   0.00361  -1.78790
   D79       -2.90413   0.00037  -0.00003   0.00978   0.00977  -2.89436
   D80        0.27418   0.00038  -0.00003   0.01071   0.01069   0.28487
   D81       -3.10573   0.00004  -0.00001   0.00156   0.00156  -3.10417
   D82        0.04946   0.00006   0.00001   0.00283   0.00284   0.05231
   D83       -0.00045   0.00002   0.00000   0.00062   0.00062   0.00017
   D84       -3.12844   0.00004   0.00002   0.00189   0.00191  -3.12654
   D85        3.09835  -0.00007  -0.00001  -0.00332  -0.00333   3.09502
   D86       -0.04672  -0.00003   0.00000  -0.00177  -0.00177  -0.04849
   D87       -0.00706  -0.00006  -0.00001  -0.00241  -0.00243  -0.00948
   D88        3.13105  -0.00002   0.00000  -0.00087  -0.00087   3.13019
   D89        0.00664   0.00003   0.00001   0.00120   0.00121   0.00785
   D90       -3.13626   0.00001   0.00001   0.00055   0.00056  -3.13570
   D91        3.13453   0.00000  -0.00001  -0.00010  -0.00011   3.13442
   D92       -0.00838  -0.00002  -0.00001  -0.00075  -0.00076  -0.00914
   D93       -0.00534  -0.00003  -0.00001  -0.00123  -0.00124  -0.00658
   D94        3.14043  -0.00002  -0.00001  -0.00080  -0.00081   3.13962
   D95        3.13757  -0.00001  -0.00001  -0.00058  -0.00059   3.13698
   D96        0.00016   0.00000   0.00000  -0.00016  -0.00016   0.00000
   D97       -0.00213  -0.00001   0.00000  -0.00056  -0.00056  -0.00269
   D98       -3.13428   0.00002   0.00001   0.00090   0.00090  -3.13337
   D99        3.13528  -0.00002  -0.00001  -0.00098  -0.00099   3.13429
   D100       0.00313   0.00001   0.00000   0.00047   0.00048   0.00361
   D101       0.00838   0.00006   0.00001   0.00239   0.00241   0.01079
   D102      -3.12974   0.00002   0.00000   0.00085   0.00086  -3.12888
   D103       3.14057   0.00002   0.00000   0.00094   0.00095   3.14152
   D104       0.00246  -0.00001  -0.00001  -0.00060  -0.00061   0.00185
   D105       2.39971   0.00004   0.00004   0.00592   0.00596   2.40567
   D106      -0.77872   0.00003   0.00005   0.00506   0.00511  -0.77362
   D107      -1.78654  -0.00027   0.00005   0.00252   0.00256  -1.78397
   D108       1.31822  -0.00028   0.00006   0.00166   0.00171   1.31993
   D109       0.27928   0.00036  -0.00004   0.00929   0.00927   0.28855
   D110      -2.89916   0.00035  -0.00003   0.00843   0.00842  -2.89074
   D111       3.09834  -0.00007   0.00000  -0.00319  -0.00320   3.09514
   D112      -0.04683  -0.00003   0.00001  -0.00148  -0.00148  -0.04831
   D113      -0.00694  -0.00006  -0.00001  -0.00235  -0.00236  -0.00931
   D114       3.13107  -0.00002   0.00000  -0.00064  -0.00064   3.13043
   D115      -3.10547   0.00004  -0.00001   0.00153   0.00152  -3.10395
   D116       0.04983   0.00006   0.00001   0.00278   0.00280   0.05262
   D117      -0.00030   0.00002   0.00000   0.00065   0.00065   0.00035
   D118      -3.12819   0.00004   0.00002   0.00191   0.00193  -3.12626
   D119       0.00813   0.00005   0.00001   0.00233   0.00234   0.01047
   D120       3.14050   0.00002   0.00000   0.00091   0.00091   3.14141
   D121      -3.12988   0.00002   0.00000   0.00062   0.00062  -3.12926
   D122       0.00249  -0.00002  -0.00001  -0.00080  -0.00081   0.00168
   D123      -0.00200  -0.00001   0.00000  -0.00058  -0.00059  -0.00259
   D124       3.13542  -0.00002  -0.00001  -0.00094  -0.00095   3.13447
   D125      -3.13433   0.00002   0.00001   0.00084   0.00085  -3.13349
   D126       0.00309   0.00001   0.00000   0.00048   0.00048   0.00358
   D127      -0.00521  -0.00003  -0.00001  -0.00110  -0.00111  -0.00632
   D128       3.13751  -0.00001  -0.00001  -0.00050  -0.00051   3.13700
   D129       3.14055  -0.00002   0.00000  -0.00075  -0.00075   3.13980
   D130       0.00009   0.00000   0.00000  -0.00014  -0.00015  -0.00006
   D131       0.00638   0.00002   0.00001   0.00107   0.00108   0.00746
   D132       3.13416   0.00000  -0.00001  -0.00022  -0.00023   3.13393
   D133      -3.13634   0.00001   0.00001   0.00047   0.00047  -3.13587
   D134      -0.00856  -0.00002  -0.00001  -0.00082  -0.00083  -0.00940
         Item               Value     Threshold  Converged?
 Maximum Force            0.006719     0.000450     NO 
 RMS     Force            0.000759     0.000300     NO 
 Maximum Displacement     0.245987     0.001800     NO 
 RMS     Displacement     0.059500     0.001200     NO 
 Predicted change in Energy=-2.428113D-04
 GradGradGradGradGradGradGradGradGradGradGradGradGradGradGradGradGradGrad

 Stoichiometry    C29H24O3
 Framework group  C1[X(C29H24O3)]
 Deg. of freedom   162
 Full point group                 C1      NOp   1
 Largest Abelian subgroup         C1      NOp   1
 Largest concise Abelian subgroup C1      NOp   1
                         Standard orientation:                         
 ---------------------------------------------------------------------
 Center     Atomic     Atomic              Coordinates (Angstroms)
 Number     Number      Type              X           Y           Z
 ---------------------------------------------------------------------
    1          6             0        2.773774   -0.142976    0.124125
    2          6             0        4.050208   -0.674536    0.131705
    3          6             0        5.169178    0.162104   -0.038794
    4          6             0        4.981096    1.537951   -0.216547
    5          6             0        3.686361    2.057118   -0.220121
    6          6             0        2.556152    1.242062   -0.053553
    7          8             0        6.377484   -0.461881   -0.018725
    8          6             0        1.232989    1.855994   -0.070497
    9          6             0        0.030836    1.252829    0.030123
   10          6             0       -1.211130    2.067530    0.009619
   11          6             0       -2.535587    1.367246    0.013261
   12          6             0       -3.678744    2.135620    0.270280
   13          6             0       -4.951192    1.571830    0.281739
   14          6             0       -5.101535    0.202467    0.014190
   15          6             0       -3.968154   -0.580007   -0.258954
   16          6             0       -2.706372   -0.003848   -0.254881
   17          8             0       -6.291009   -0.456500   -0.004116
   18          6             0        7.558459    0.328330   -0.148980
   19          6             0        8.765478   -0.571581   -0.036713
   20          6             0        8.831778   -1.555519    0.958246
   21          6             0        9.967583   -2.353399    1.084733
   22          6             0       11.054291   -2.171622    0.224963
   23          6             0       10.995001   -1.192751   -0.766676
   24          6             0        9.851993   -0.401291   -0.899598
   25          8             0       -1.165751    3.296625    0.023472
   26          6             0       -7.490307    0.283216    0.221363
   27          6             0       -8.671660   -0.646802    0.082854
   28          6             0       -9.735007   -0.572811    0.987280
   29          6             0      -10.856153   -1.391363    0.833560
   30          6             0      -10.916385   -2.301197   -0.221778
   31          6             0       -9.852553   -2.386658   -1.123997
   32          6             0       -8.738854   -1.561815   -0.975778
   33          1             0        1.928513   -0.810232    0.261577
   34          1             0        4.218385   -1.737906    0.268743
   35          1             0        5.822624    2.206570   -0.353045
   36          1             0        3.549924    3.126634   -0.357893
   37          1             0        1.212850    2.939935   -0.178905
   38          1             0       -0.051937    0.178244    0.150287
   39          1             0       -3.546995    3.195460    0.462604
   40          1             0       -5.809716    2.197099    0.496900
   41          1             0       -4.107123   -1.634526   -0.474126
   42          1             0       -1.852705   -0.630813   -0.489182
   43          1             0        7.572910    1.091721    0.644288
   44          1             0        7.561897    0.853621   -1.113961
   45          1             0        7.984166   -1.700000    1.621107
   46          1             0       10.006741   -3.117371    1.856217
   47          1             0       11.939405   -2.793221    0.326250
   48          1             0       11.831969   -1.049667   -1.444252
   49          1             0        9.805792    0.352685   -1.681971
   50          1             0       -7.556517    1.100184   -0.513527
   51          1             0       -7.477279    0.737754    1.221422
   52          1             0       -9.687613    0.126977    1.818415
   53          1             0      -11.675125   -1.323346    1.544053
   54          1             0      -11.784334   -2.943722   -0.339842
   55          1             0       -9.892269   -3.096622   -1.945461
   56          1             0       -7.908629   -1.632150   -1.671797
 ---------------------------------------------------------------------
 Rotational constants (GHZ):      0.4612215      0.0244851      0.0235197
 Standard basis: 6-31G(d,p) (6D, 7F)
 There are   600 symmetry adapted basis functions of A   symmetry.
 Integral buffers will be    262144 words long.
 Raffenetti 2 integral format.
 Two-electron integral symmetry is turned on.
   600 basis functions,  1064 primitive gaussians,   600 cartesian basis functions
   111 alpha electrons      111 beta electrons
       nuclear repulsion energy      2501.4118623154 Hartrees.
 NAtoms=   56 NActive=   56 NUniq=   56 SFac= 1.00D+00 NAtFMM=   60 Big=F
 One-electron integrals computed using PRISM.
 NBasis=   600 RedAO= T  NBF=   600
 NBsUse=   600 1.00D-06 NBFU=   600
 Initial guess read from the read-write file:
 Initial guess orbital symmetries:
       Occupied  (A) (A) (A) (A) (A) (A) (A) (A) (A) (A) (A) (A)
                 (A) (A) (A) (A) (A) (A) (A) (A) (A) (A) (A) (A)
                 (A) (A) (A) (A) (A) (A) (A) (A) (A) (A) (A) (A)
                 (A) (A) (A) (A) (A) (A) (A) (A) (A) (A) (A) (A)
                 (A) (A) (A) (A) (A) (A) (A) (A) (A) (A) (A) (A)
                 (A) (A) (A) (A) (A) (A) (A) (A) (A) (A) (A) (A)
                 (A) (A) (A) (A) (A) (A) (A) (A) (A) (A) (A) (A)
                 (A) (A) (A) (A) (A) (A) (A) (A) (A) (A) (A) (A)
                 (A) (A) (A) (A) (A) (A) (A) (A) (A) (A) (A) (A)
                 (A) (A) (A)
       Virtual   (A) (A) (A) (A) (A) (A) (A) (A) (A) (A) (A) (A)
                 (A) (A) (A) (A) (A) (A) (A) (A) (A) (A) (A) (A)
                 (A) (A) (A) (A) (A) (A) (A) (A) (A) (A) (A) (A)
                 (A) (A) (A) (A) (A) (A) (A) (A) (A) (A) (A) (A)
                 (A) (A) (A) (A) (A) (A) (A) (A) (A) (A) (A) (A)
                 (A) (A) (A) (A) (A) (A) (A) (A) (A) (A) (A) (A)
                 (A) (A) (A) (A) (A) (A) (A) (A) (A) (A) (A) (A)
                 (A) (A) (A) (A) (A) (A) (A) (A) (A) (A) (A) (A)
                 (A) (A) (A) (A) (A) (A) (A) (A) (A) (A) (A) (A)
                 (A) (A) (A) (A) (A) (A) (A) (A) (A) (A) (A) (A)
                 (A) (A) (A) (A) (A) (A) (A) (A) (A) (A) (A) (A)
                 (A) (A) (A) (A) (A) (A) (A) (A) (A) (A) (A) (A)
                 (A) (A) (A) (A) (A) (A) (A) (A) (A) (A) (A) (A)
                 (A) (A) (A) (A) (A) (A) (A) (A) (A) (A) (A) (A)
                 (A) (A) (A) (A) (A) (A) (A) (A) (A) (A) (A) (A)
                 (A) (A) (A) (A) (A) (A) (A) (A) (A) (A) (A) (A)
                 (A) (A) (A) (A) (A) (A) (A) (A) (A) (A) (A) (A)
                 (A) (A) (A) (A) (A) (A) (A) (A) (A) (A) (A) (A)
                 (A) (A) (A) (A) (A) (A) (A) (A) (A) (A) (A) (A)
                 (A) (A) (A) (A) (A) (A) (A) (A) (A) (A) (A) (A)
                 (A) (A) (A) (A) (A) (A) (A) (A) (A) (A) (A) (A)
                 (A) (A) (A) (A) (A) (A) (A) (A) (A) (A) (A) (A)
                 (A) (A) (A) (A) (A) (A) (A) (A) (A) (A) (A) (A)
                 (A) (A) (A) (A) (A) (A) (A) (A) (A) (A) (A) (A)
                 (A) (A) (A) (A) (A) (A) (A) (A) (A) (A) (A) (A)
                 (A) (A) (A) (A) (A) (A) (A) (A) (A) (A) (A) (A)
                 (A) (A) (A) (A) (A) (A) (A) (A) (A) (A) (A) (A)
                 (A) (A) (A) (A) (A) (A) (A) (A) (A) (A) (A) (A)
                 (A) (A) (A) (A) (A) (A) (A) (A) (A) (A) (A) (A)
                 (A) (A) (A) (A) (A) (A) (A) (A) (A) (A) (A) (A)
                 (A) (A) (A) (A) (A) (A) (A) (A) (A) (A) (A) (A)
                 (A) (A) (A) (A) (A) (A) (A) (A) (A) (A) (A) (A)
                 (A) (A) (A) (A) (A) (A) (A) (A) (A) (A) (A) (A)
                 (A) (A) (A) (A) (A) (A) (A) (A) (A) (A) (A) (A)
                 (A) (A) (A) (A) (A) (A) (A) (A) (A) (A) (A) (A)
                 (A) (A) (A) (A) (A) (A) (A) (A) (A) (A) (A) (A)
                 (A) (A) (A) (A) (A) (A) (A) (A) (A) (A) (A) (A)
                 (A) (A) (A) (A) (A) (A) (A) (A) (A) (A) (A) (A)
                 (A) (A) (A) (A) (A) (A) (A) (A) (A) (A) (A) (A)
                 (A) (A) (A) (A) (A) (A) (A) (A) (A) (A) (A) (A)
                 (A) (A) (A) (A) (A) (A) (A) (A) (A)
 Harris functional with IExCor=  402 diagonalized for initial guess.
 ExpMin= 1.61D-01 ExpMax= 5.48D+03 ExpMxC= 8.25D+02 IAcc=1 IRadAn=         1 AccDes= 1.00D-06
 HarFok:  IExCor= 402 AccDes= 1.00D-06 IRadAn=         1 IDoV=1
 ScaDFX=  1.000000  1.000000  1.000000  1.000000
 Requested convergence on RMS density matrix=1.00D-08 within 128 cycles.
 Requested convergence on MAX density matrix=1.00D-06.
 Requested convergence on             energy=1.00D-06.
 No special actions if energy rises.
 Integral accuracy reduced to 1.0D-05 until final iterations.
 Initial convergence to 1.0D-05 achieved.  Increase integral accuracy.
 SCF Done:  E(RB+HF-LYP) =  -1345.22823972     A.U. after   12 cycles
             Convg  =    0.6023D-08             -V/T =  2.0096
             S**2   =   0.0000
 ***** Axes restored to original set *****
 -------------------------------------------------------------------
 Center     Atomic                   Forces (Hartrees/Bohr)
 Number     Number              X              Y              Z
 -------------------------------------------------------------------
    1          6           0.000128025   -0.000030144    0.000198820
    2          6           0.000202953    0.000034016    0.000178350
    3          6          -0.000028662    0.000054026   -0.001082415
    4          6           0.000191258   -0.000010400   -0.000507823
    5          6           0.000367418    0.000057306    0.001065067
    6          6          -0.000682988    0.000032655   -0.001065271
    7          8          -0.001324704   -0.000174433   -0.000192740
    8          6           0.000441901    0.000072622    0.001510136
    9          6           0.000439120   -0.000487119   -0.001908648
   10          6          -0.003896968    0.001752747    0.001874272
   11          6           0.000839162   -0.000848056    0.000565601
   12          6          -0.000345843    0.000030329   -0.000946818
   13          6           0.000113936    0.000033854    0.000175832
   14          6           0.001164139    0.000156312    0.000726162
   15          6          -0.000033292    0.000067355   -0.000166384
   16          6           0.000167007    0.000147164   -0.000150178
   17          8          -0.000982604   -0.000326337    0.000957581
   18          6           0.001725878    0.000205003    0.001482594
   19          6          -0.000211965    0.000144012   -0.000413754
   20          6           0.000003231   -0.000016535    0.000058791
   21          6           0.000140608   -0.000122541    0.000120556
   22          6          -0.000130366    0.000135843   -0.000104120
   23          6           0.000054576   -0.000098400   -0.000235824
   24          6           0.000085604    0.000043983    0.000424248
   25          8           0.002480774   -0.000438975   -0.000896427
   26          6           0.000064620    0.000235002   -0.002140979
   27          6           0.000176520   -0.000168051    0.000354693
   28          6          -0.000233514   -0.000049550   -0.000346000
   29          6           0.000170567    0.000123619    0.000115444
   30          6           0.000066914   -0.000113827    0.000139111
   31          6          -0.000064784    0.000141556   -0.000159455
   32          6          -0.000062760   -0.000006236   -0.000012237
   33          1           0.000178095   -0.000029554    0.000018821
   34          1           0.000209833    0.000006108   -0.000134271
   35          1          -0.000264151   -0.000019931   -0.000118244
   36          1          -0.000256013   -0.000014857   -0.000035838
   37          1          -0.000365916   -0.000102682   -0.000265295
   38          1           0.000148386   -0.000302252    0.000126213
   39          1          -0.000225076   -0.000109305    0.000351362
   40          1          -0.000021509   -0.000064004    0.000291852
   41          1           0.000193899    0.000118724   -0.000072891
   42          1          -0.000007117    0.000099449   -0.000043311
   43          1          -0.000232658   -0.000279489   -0.000057654
   44          1          -0.000347050    0.000181834   -0.000082467
   45          1           0.000147230   -0.000147296    0.000133834
   46          1           0.000146401   -0.000117245   -0.000076402
   47          1           0.000074187   -0.000009946   -0.000184552
   48          1          -0.000131071    0.000119464   -0.000095600
   49          1          -0.000176836    0.000110657    0.000027330
   50          1          -0.000206795    0.000176675    0.000250736
   51          1          -0.000078797   -0.000294909    0.000252339
   52          1          -0.000062655   -0.000190339    0.000092771
   53          1           0.000029664   -0.000145295    0.000132836
   54          1           0.000168431    0.000068270    0.000075981
   55          1           0.000094887    0.000176391   -0.000032599
   56          1          -0.000041135    0.000192734   -0.000173137
 -------------------------------------------------------------------
 Cartesian Forces:  Max     0.003896968 RMS     0.000605213

 GradGradGradGradGradGradGradGradGradGradGradGradGradGradGradGradGradGrad
 Berny optimization.
 Internal  Forces:  Max     0.002504840 RMS     0.000284013
 Search for a local minimum.
 Step number   3 out of a maximum of 298
 All quantities printed in internal units (Hartrees-Bohrs-Radians)
 Update second derivatives using D2CorX and points  1  2  3
 Trust test= 1.18D+00 RLast= 8.51D-02 DXMaxT set to 4.24D-01
     Eigenvalues ---    0.00624   0.00652   0.00708   0.00898   0.01131
     Eigenvalues ---    0.01205   0.01601   0.01603   0.01603   0.01608
     Eigenvalues ---    0.01779   0.01853   0.02021   0.02098   0.02151
     Eigenvalues ---    0.02194   0.02219   0.02228   0.02240   0.02242
     Eigenvalues ---    0.02251   0.02256   0.02258   0.02262   0.02263
     Eigenvalues ---    0.02263   0.02265   0.02267   0.02267   0.02270
     Eigenvalues ---    0.02273   0.02273   0.02275   0.02279   0.02280
     Eigenvalues ---    0.02287   0.02287   0.02288   0.02290   0.02293
     Eigenvalues ---    0.02294   0.02298   0.02302   0.02303   0.02325
     Eigenvalues ---    0.02351   0.02424   0.02431   0.03021   0.06440
     Eigenvalues ---    0.06446   0.07351   0.07378   0.11194   0.11465
     Eigenvalues ---    0.13923   0.13929   0.15157   0.15996   0.15998
     Eigenvalues ---    0.15998   0.15998   0.15999   0.15999   0.16000
     Eigenvalues ---    0.16000   0.16000   0.16000   0.16000   0.16000
     Eigenvalues ---    0.16000   0.16000   0.16000   0.16000   0.16000
     Eigenvalues ---    0.16005   0.16021   0.21767   0.22000   0.22000
     Eigenvalues ---    0.22000   0.22000   0.22000   0.22001   0.22008
     Eigenvalues ---    0.22018   0.22249   0.22878   0.22963   0.23465
     Eigenvalues ---    0.23473   0.23817   0.24002   0.24293   0.24982
     Eigenvalues ---    0.24983   0.24992   0.24996   0.25000   0.25000
     Eigenvalues ---    0.25000   0.25051   0.26543   0.30080   0.31490
     Eigenvalues ---    0.31932   0.33108   0.35126   0.35209   0.35351
     Eigenvalues ---    0.35395   0.35548   0.36388   0.36390   0.36418
     Eigenvalues ---    0.36467   0.36504   0.36509   0.36516   0.36518
     Eigenvalues ---    0.36520   0.36581   0.36630   0.36657   0.36684
     Eigenvalues ---    0.36714   0.36758   0.36791   0.36878   0.36929
     Eigenvalues ---    0.36987   0.37873   0.41266   0.42745   0.43054
     Eigenvalues ---    0.43187   0.43399   0.43402   0.43454   0.43488
     Eigenvalues ---    0.43498   0.44542   0.46465   0.46960   0.47217
     Eigenvalues ---    0.47289   0.47516   0.47571   0.47817   0.47894
     Eigenvalues ---    0.47941   0.48131   0.48172   0.48193   0.48533
     Eigenvalues ---    0.49040   0.49713   0.51463   0.55069   0.56238
     Eigenvalues ---    0.59636   0.960161000.000001000.000001000.00000
     Eigenvalues --- 1000.000001000.000001000.000001000.000001000.00000
     Eigenvalues --- 1000.000001000.000001000.000001000.000001000.00000
     Eigenvalues --- 1000.000001000.000001000.000001000.000001000.00000
     Eigenvalues --- 1000.000001000.000001000.000001000.000001000.00000
     Eigenvalues --- 1000.000001000.000001000.000001000.000001000.00000
     Eigenvalues --- 1000.000001000.000001000.000001000.000001000.00000
     Eigenvalues --- 1000.000001000.000001000.000001000.000001000.00000
     Eigenvalues --- 1000.000001000.000001000.000001000.000001000.00000
     Eigenvalues --- 1000.000001000.000001000.000001000.000001000.00000
     Eigenvalues --- 1000.000001000.000001000.000001000.000001000.00000
     Eigenvalues --- 1000.000001000.000001000.000001000.000001000.00000
     Eigenvalues --- 1000.000001000.000001000.000001000.000001000.00000
     Eigenvalues --- 1000.000001000.000001000.000001000.000001000.00000
     Eigenvalues --- 1000.000001000.000001000.000001000.000001000.00000
     Eigenvalues --- 1000.000001000.000001000.000001000.000001000.00000
     Eigenvalues --- 1000.000001000.000001000.000001000.000001000.00000
     Eigenvalues --- 1000.000001000.000001000.000001000.000001000.00000
     Eigenvalues --- 1000.000001000.000001000.000001000.000001000.00000
     Eigenvalues --- 1000.000001000.000001000.000001000.000001000.00000
     Eigenvalues --- 1000.000001000.000001000.000001000.000001000.00000
     Eigenvalues --- 1000.000001000.000001000.000001000.000001000.00000
     Eigenvalues --- 1000.000001000.000001000.000001000.000001000.00000
     Eigenvalues --- 1000.000001000.000001000.000001000.000001000.00000
     Eigenvalues --- 1000.000001000.000001000.000001000.000001000.00000
     Eigenvalues --- 1000.000001000.000001000.00000
 RFO step:  Lambda=-3.77922020D-04.
 Quartic linear search produced a step of  0.23814.
 Iteration  1 RMS(Cart)=  0.08446705 RMS(Int)=  0.00184976
 Iteration  2 RMS(Cart)=  0.00437148 RMS(Int)=  0.00017281
 Iteration  3 RMS(Cart)=  0.00001056 RMS(Int)=  0.00017279
 Iteration  4 RMS(Cart)=  0.00000000 RMS(Int)=  0.00017279
 Variable       Old X    -DE/DX   Delta X   Delta X   Delta X     New X
                                 (Linear)    (Quad)   (Total)
    R1        2.61295  -0.00021  -0.00022  -0.00051  -0.00073   2.61222
    R2        2.67064  -0.00032  -0.00006  -0.00048  -0.00054   2.67011
    R3        2.05154  -0.00016   0.00002  -0.00003  -0.00002   2.05153
    R4        2.65984  -0.00042  -0.00083  -0.00251  -0.00334   2.65650
    R5        2.05087  -0.00025   0.00015  -0.00003   0.00012   2.05099
    R6        2.64557  -0.00013   0.00019   0.00076   0.00096   2.64652
    R7        2.57014   0.00082   0.00103   0.00471   0.00574   2.57588
    R8        2.63607  -0.00065  -0.00103  -0.00368  -0.00471   2.63137
    R9        2.04741  -0.00029   0.00002  -0.00044  -0.00042   2.04699
   R10        2.65198   0.00035   0.00058   0.00296   0.00354   2.65552
   R11        2.05404  -0.00021   0.00009  -0.00002   0.00007   2.05410
   R12        2.75664  -0.00067  -0.00193  -0.00698  -0.00891   2.74773
   R13        2.69649   0.00152   0.00167   0.00877   0.01044   2.70693
   R14        2.54875   0.00033   0.00053   0.00268   0.00321   2.55196
   R15        2.05892  -0.00024   0.00024   0.00028   0.00052   2.05944
   R16        2.80714  -0.00127  -0.00260  -0.01040  -0.01300   2.79414
   R17        2.04931  -0.00008  -0.00013  -0.00002  -0.00015   2.04916
   R18        2.83118  -0.00074  -0.00144  -0.00582  -0.00726   2.82392
   R19        2.32438   0.00250   0.00187   0.00828   0.01015   2.33453
   R20        2.64782   0.00020   0.00015   0.00144   0.00159   2.64941
   R21        2.65973  -0.00043  -0.00007  -0.00080  -0.00087   2.65886
   R22        2.63013  -0.00044  -0.00076  -0.00243  -0.00319   2.62694
   R23        2.05069  -0.00033   0.00012  -0.00035  -0.00024   2.05045
   R24        2.65191  -0.00024  -0.00014  -0.00032  -0.00046   2.65145
   R25        2.04782  -0.00030   0.00006  -0.00038  -0.00032   2.04750
   R26        2.65332  -0.00037  -0.00064  -0.00192  -0.00257   2.65075
   R27        2.56990   0.00107   0.00110   0.00546   0.00657   2.57647
   R28        2.62126  -0.00022  -0.00032  -0.00079  -0.00111   2.62015
   R29        2.05070  -0.00024   0.00015   0.00003   0.00018   2.05088
   R30        2.04992  -0.00007  -0.00013  -0.00004  -0.00017   2.04975
   R31        2.69664   0.00144   0.00158   0.00833   0.00991   2.70655
   R32        2.85301  -0.00034  -0.00106  -0.00359  -0.00466   2.84835
   R33        2.08063  -0.00033   0.00030   0.00009   0.00039   2.08102
   R34        2.07623  -0.00033   0.00025  -0.00005   0.00019   2.07643
   R35        2.64728  -0.00028  -0.00031  -0.00095  -0.00126   2.64603
   R36        2.64162   0.00000  -0.00008   0.00037   0.00030   2.64192
   R37        2.63389  -0.00020  -0.00018  -0.00041  -0.00059   2.63330
   R38        2.05164  -0.00025   0.00009  -0.00016  -0.00007   2.05157
   R39        2.64101  -0.00038  -0.00043  -0.00150  -0.00193   2.63908
   R40        2.05309  -0.00020   0.00010   0.00000   0.00011   2.05320
   R41        2.63551  -0.00019  -0.00014  -0.00027  -0.00041   2.63510
   R42        2.05283  -0.00020   0.00011   0.00003   0.00014   2.05297
   R43        2.63923  -0.00040  -0.00050  -0.00172  -0.00221   2.63701
   R44        2.05285  -0.00019   0.00010   0.00003   0.00014   2.05299
   R45        2.05513  -0.00020   0.00012   0.00005   0.00018   2.05531
   R46        2.85325  -0.00030  -0.00103  -0.00337  -0.00440   2.84884
   R47        2.08032  -0.00034   0.00031   0.00008   0.00039   2.08071
   R48        2.07603  -0.00034   0.00026  -0.00003   0.00022   2.07625
   R49        2.64168  -0.00002  -0.00009   0.00028   0.00020   2.64187
   R50        2.64728  -0.00029  -0.00030  -0.00095  -0.00125   2.64602
   R51        2.63928  -0.00040  -0.00049  -0.00172  -0.00221   2.63707
   R52        2.05515  -0.00021   0.00012   0.00002   0.00014   2.05529
   R53        2.63558  -0.00021  -0.00014  -0.00033  -0.00047   2.63511
   R54        2.05289  -0.00019   0.00011   0.00004   0.00015   2.05304
   R55        2.64092  -0.00036  -0.00042  -0.00144  -0.00186   2.63906
   R56        2.05287  -0.00019   0.00011   0.00005   0.00016   2.05302
   R57        2.63389  -0.00018  -0.00018  -0.00035  -0.00053   2.63336
   R58        2.05314  -0.00020   0.00011   0.00001   0.00012   2.05326
   R59        2.05160  -0.00025   0.00008  -0.00019  -0.00011   2.05150
    A1        2.11718   0.00001   0.00029   0.00074   0.00103   2.11821
    A2        2.07347   0.00006   0.00002   0.00064   0.00066   2.07413
    A3        2.09253  -0.00008  -0.00031  -0.00138  -0.00169   2.09084
    A4        2.09985   0.00010  -0.00023  -0.00006  -0.00029   2.09955
    A5        2.11814  -0.00005   0.00022   0.00025   0.00047   2.11861
    A6        2.06520  -0.00004   0.00001  -0.00019  -0.00018   2.06502
    A7        2.08603   0.00002   0.00032   0.00070   0.00102   2.08705
    A8        2.01727  -0.00025  -0.00092  -0.00318  -0.00409   2.01318
    A9        2.17988   0.00023   0.00060   0.00248   0.00307   2.18295
   A10        2.08378  -0.00007  -0.00011  -0.00065  -0.00075   2.08303
   A11        2.11547   0.00001  -0.00024  -0.00058  -0.00082   2.11465
   A12        2.08393   0.00006   0.00034   0.00123   0.00157   2.08550
   A13        2.13062   0.00015   0.00015   0.00122   0.00136   2.13199
   A14        2.07492   0.00009   0.00051   0.00205   0.00257   2.07748
   A15        2.07765  -0.00024  -0.00066  -0.00327  -0.00393   2.07371
   A16        2.04891  -0.00022  -0.00042  -0.00194  -0.00237   2.04654
   A17        2.15747   0.00023   0.00063   0.00244   0.00306   2.16053
   A18        2.07680  -0.00001  -0.00020  -0.00049  -0.00070   2.07611
   A19        2.07130   0.00020  -0.00206  -0.00408  -0.00614   2.06516
   A20        2.23876   0.00015   0.00072   0.00252   0.00323   2.24199
   A21        2.02264   0.00033   0.00114   0.00531   0.00645   2.02909
   A22        2.02179  -0.00048  -0.00186  -0.00783  -0.00968   2.01210
   A23        2.09313   0.00025  -0.00062   0.00010  -0.00053   2.09261
   A24        2.11699  -0.00029  -0.00033  -0.00273  -0.00306   2.11393
   A25        2.07279   0.00004   0.00093   0.00268   0.00361   2.07640
   A26        2.07457   0.00016   0.00260   0.00748   0.00840   2.08296
   A27        2.11418  -0.00004  -0.00108  -0.00144  -0.00421   2.10997
   A28        2.09400  -0.00010  -0.00162  -0.00292  -0.00623   2.08777
   A29        2.05485   0.00033  -0.00124  -0.00115  -0.00239   2.05246
   A30        2.16777  -0.00020   0.00133   0.00205   0.00337   2.17115
   A31        2.06027  -0.00014  -0.00011  -0.00080  -0.00091   2.05935
   A32        2.12383   0.00008   0.00019   0.00091   0.00110   2.12493
   A33        2.05900  -0.00032  -0.00093  -0.00465  -0.00558   2.05341
   A34        2.10036   0.00024   0.00075   0.00374   0.00448   2.10485
   A35        2.08478  -0.00005  -0.00031  -0.00096  -0.00128   2.08350
   A36        2.08542  -0.00001   0.00042   0.00087   0.00130   2.08672
   A37        2.11298   0.00006  -0.00011   0.00009  -0.00002   2.11296
   A38        2.08795   0.00001   0.00040   0.00081   0.00121   2.08916
   A39        2.17621   0.00030   0.00062   0.00292   0.00354   2.17974
   A40        2.01903  -0.00031  -0.00102  -0.00373  -0.00475   2.01428
   A41        2.09697   0.00009  -0.00006   0.00027   0.00021   2.09718
   A42        2.06774  -0.00006  -0.00003  -0.00045  -0.00048   2.06727
   A43        2.11847  -0.00003   0.00009   0.00017   0.00026   2.11873
   A44        2.11247   0.00001  -0.00010  -0.00020  -0.00030   2.11217
   A45        2.10446  -0.00002   0.00032   0.00059   0.00091   2.10537
   A46        2.06593   0.00001  -0.00024  -0.00033  -0.00057   2.06536
   A47        2.07348   0.00006  -0.00240  -0.00554  -0.00795   2.06553
   A48        1.90160   0.00010  -0.00099  -0.00183  -0.00282   1.89878
   A49        1.90611  -0.00014  -0.00082  -0.00336  -0.00418   1.90193
   A50        1.92573  -0.00019  -0.00076  -0.00373  -0.00448   1.92126
   A51        1.92753   0.00010   0.00126   0.00420   0.00545   1.93298
   A52        1.92601   0.00011   0.00118   0.00390   0.00507   1.93108
   A53        1.87681   0.00003   0.00014   0.00078   0.00087   1.87769
   A54        2.10518   0.00012   0.00014   0.00082   0.00096   2.10614
   A55        2.09773  -0.00001  -0.00022  -0.00062  -0.00084   2.09690
   A56        2.07967  -0.00010   0.00008  -0.00024  -0.00016   2.07951
   A57        2.10029   0.00001  -0.00005  -0.00004  -0.00010   2.10019
   A58        2.08306  -0.00005  -0.00026  -0.00101  -0.00127   2.08179
   A59        2.09974   0.00003   0.00031   0.00104   0.00135   2.10109
   A60        2.09828   0.00004  -0.00004   0.00008   0.00003   2.09831
   A61        2.09019  -0.00003   0.00002  -0.00015  -0.00013   2.09006
   A62        2.09472  -0.00001   0.00002   0.00007   0.00010   2.09482
   A63        2.08938   0.00000   0.00009   0.00016   0.00025   2.08963
   A64        2.09644   0.00003   0.00001   0.00025   0.00026   2.09670
   A65        2.09735  -0.00003  -0.00010  -0.00041  -0.00050   2.09685
   A66        2.09464  -0.00001   0.00001  -0.00005  -0.00004   2.09461
   A67        2.09808  -0.00004  -0.00006  -0.00043  -0.00049   2.09759
   A68        2.09041   0.00005   0.00005   0.00048   0.00053   2.09094
   A69        2.10404   0.00005  -0.00009   0.00009   0.00001   2.10405
   A70        2.08922  -0.00006  -0.00023  -0.00101  -0.00123   2.08799
   A71        2.08992   0.00001   0.00031   0.00091   0.00123   2.09115
   A72        1.90052   0.00020  -0.00096  -0.00113  -0.00209   1.89843
   A73        1.90684  -0.00017  -0.00078  -0.00337  -0.00415   1.90269
   A74        1.92660  -0.00021  -0.00074  -0.00362  -0.00435   1.92225
   A75        1.92711   0.00007   0.00124   0.00401   0.00524   1.93234
   A76        1.92585   0.00006   0.00118   0.00359   0.00476   1.93061
   A77        1.87691   0.00003   0.00008   0.00047   0.00051   1.87742
   A78        2.09810  -0.00008  -0.00019  -0.00087  -0.00107   2.09703
   A79        2.10503   0.00016   0.00011   0.00096   0.00107   2.10610
   A80        2.07945  -0.00008   0.00008  -0.00013  -0.00006   2.07939
   A81        2.10411   0.00005  -0.00008   0.00011   0.00003   2.10414
   A82        2.08904  -0.00009  -0.00025  -0.00125  -0.00150   2.08754
   A83        2.09004   0.00003   0.00033   0.00113   0.00147   2.09150
   A84        2.09472  -0.00002   0.00001  -0.00014  -0.00013   2.09460
   A85        2.09035   0.00006   0.00005   0.00057   0.00062   2.09096
   A86        2.09806  -0.00004  -0.00006  -0.00043  -0.00049   2.09757
   A87        2.08923   0.00002   0.00009   0.00026   0.00035   2.08958
   A88        2.09738  -0.00004  -0.00010  -0.00047  -0.00057   2.09682
   A89        2.09656   0.00002   0.00001   0.00020   0.00022   2.09678
   A90        2.09834   0.00003  -0.00005   0.00003  -0.00001   2.09833
   A91        2.09468  -0.00001   0.00002   0.00006   0.00008   2.09476
   A92        2.09016  -0.00003   0.00002  -0.00009  -0.00007   2.09009
   A93        2.10045  -0.00001  -0.00005  -0.00014  -0.00019   2.10026
   A94        2.08301  -0.00006  -0.00028  -0.00121  -0.00149   2.08152
   A95        2.09963   0.00007   0.00033   0.00134   0.00167   2.10130
    D1        0.00029  -0.00001  -0.00003  -0.00079  -0.00082  -0.00052
    D2        3.14087   0.00000  -0.00009  -0.00022  -0.00031   3.14056
    D3       -3.13757  -0.00002  -0.00004  -0.00123  -0.00127  -3.13885
    D4        0.00300  -0.00001  -0.00010  -0.00066  -0.00076   0.00223
    D5       -0.00153   0.00002   0.00005   0.00101   0.00107  -0.00046
    D6        3.14117   0.00001   0.00003   0.00049   0.00052  -3.14149
    D7        3.13630   0.00002   0.00006   0.00147   0.00153   3.13783
    D8       -0.00418   0.00002   0.00004   0.00094   0.00098  -0.00320
    D9       -0.00015   0.00000   0.00000  -0.00006  -0.00006  -0.00021
   D10       -3.13874   0.00001   0.00009   0.00059   0.00068  -3.13806
   D11       -3.14075  -0.00001   0.00006  -0.00062  -0.00055  -3.14131
   D12        0.00384  -0.00001   0.00015   0.00004   0.00019   0.00403
   D13        0.00128   0.00001   0.00000   0.00065   0.00065   0.00193
   D14       -3.13849   0.00001   0.00016   0.00077   0.00093  -3.13756
   D15        3.13957   0.00000  -0.00010  -0.00008  -0.00018   3.13939
   D16       -0.00020   0.00000   0.00006   0.00004   0.00009  -0.00010
   D17       -3.11211  -0.00002   0.00061   0.00054   0.00115  -3.11095
   D18        0.03267  -0.00001   0.00070   0.00125   0.00195   0.03462
   D19       -0.00263  -0.00001   0.00003  -0.00041  -0.00038  -0.00301
   D20        3.14065  -0.00001   0.00007  -0.00018  -0.00011   3.14053
   D21        3.13717   0.00000  -0.00013  -0.00053  -0.00066   3.13651
   D22       -0.00274   0.00000  -0.00009  -0.00030  -0.00039  -0.00313
   D23        0.00271   0.00000  -0.00005  -0.00041  -0.00046   0.00225
   D24       -3.13993   0.00000  -0.00003   0.00009   0.00006  -3.13988
   D25       -3.14056  -0.00001  -0.00009  -0.00064  -0.00073  -3.14129
   D26       -0.00003   0.00000  -0.00007  -0.00014  -0.00021  -0.00023
   D27       -0.03936   0.00006   0.00174   0.00992   0.01166  -0.02770
   D28        3.10300   0.00005   0.00183   0.00939   0.01122   3.11422
   D29        3.10335   0.00005   0.00172   0.00939   0.01111   3.11446
   D30       -0.03746   0.00004   0.00180   0.00886   0.01066  -0.02680
   D31        3.09801  -0.00003   0.00001  -0.00255  -0.00254   3.09547
   D32        0.99124  -0.00012  -0.00042  -0.00453  -0.00495   0.98629
   D33       -1.06816   0.00005   0.00036  -0.00124  -0.00088  -1.06904
   D34        3.12674   0.00002  -0.00039   0.00052   0.00013   3.12687
   D35        0.01073  -0.00007   0.00081  -0.00201  -0.00120   0.00953
   D36       -0.01563   0.00003  -0.00048   0.00106   0.00058  -0.01505
   D37       -3.13163  -0.00006   0.00072  -0.00148  -0.00075  -3.13239
   D38        3.05780  -0.00033   0.00790  -0.02520  -0.01730   3.04050
   D39       -0.11567   0.00060   0.00265   0.08792   0.09057  -0.02511
   D40       -0.10873  -0.00025   0.00671  -0.02281  -0.01610  -0.12483
   D41        3.00098   0.00068   0.00146   0.09031   0.09177   3.09275
   D42        2.91704   0.00058   0.00353   0.09057   0.09405   3.01109
   D43       -0.25125   0.00067   0.00261   0.09506   0.09761  -0.15363
   D44       -0.19304  -0.00034   0.00872  -0.02123  -0.01246  -0.20550
   D45        2.92185  -0.00025   0.00780  -0.01675  -0.00890   2.91296
   D46        3.13151   0.00004  -0.00031   0.00231   0.00200   3.13351
   D47       -0.00977   0.00004  -0.00029   0.00244   0.00214  -0.00763
   D48        0.01494  -0.00005   0.00054  -0.00194  -0.00140   0.01354
   D49       -3.12635  -0.00005   0.00055  -0.00181  -0.00126  -3.12761
   D50       -3.11980  -0.00009   0.00028  -0.00452  -0.00424  -3.12404
   D51       -0.00604  -0.00001  -0.00031  -0.00215  -0.00246  -0.00850
   D52       -0.00498   0.00002  -0.00066  -0.00002  -0.00069  -0.00567
   D53        3.10878   0.00009  -0.00125   0.00234   0.00109   3.10987
   D54       -0.01343   0.00004  -0.00013   0.00191   0.00178  -0.01165
   D55        3.12832   0.00001  -0.00029   0.00020  -0.00009   3.12823
   D56        3.12785   0.00004  -0.00014   0.00177   0.00163   3.12948
   D57       -0.01359   0.00001  -0.00030   0.00006  -0.00024  -0.01383
   D58        0.00178   0.00001  -0.00017   0.00010  -0.00007   0.00171
   D59       -3.14004  -0.00003   0.00019  -0.00110  -0.00091  -3.14094
   D60       -3.13997   0.00003  -0.00001   0.00184   0.00183  -3.13814
   D61        0.00140   0.00000   0.00035   0.00064   0.00099   0.00239
   D62        0.00790  -0.00004   0.00004  -0.00203  -0.00199   0.00591
   D63       -3.12992  -0.00004   0.00048  -0.00152  -0.00104  -3.13095
   D64       -3.13349   0.00000  -0.00029  -0.00094  -0.00123  -3.13472
   D65        0.01188  -0.00001   0.00015  -0.00042  -0.00028   0.01160
   D66        0.03559   0.00008   0.00047   0.00520   0.00567   0.04126
   D67       -3.10622   0.00005   0.00081   0.00405   0.00486  -3.10136
   D68       -0.00625   0.00003   0.00039   0.00200   0.00239  -0.00386
   D69       -3.12061  -0.00004   0.00095  -0.00033   0.00062  -3.11999
   D70        3.13145   0.00003  -0.00006   0.00147   0.00141   3.13286
   D71        0.01709  -0.00004   0.00050  -0.00085  -0.00036   0.01673
   D72        3.09176  -0.00001  -0.00045  -0.00219  -0.00264   3.08912
   D73        0.98571  -0.00012  -0.00090  -0.00435  -0.00525   0.98047
   D74       -1.07477   0.00007  -0.00007  -0.00074  -0.00081  -1.07558
   D75       -0.77751   0.00000   0.00150   0.00628   0.00778  -0.76973
   D76        2.40172   0.00001   0.00172   0.00734   0.00906   2.41078
   D77        1.31606  -0.00006   0.00064   0.00357   0.00419   1.32025
   D78       -1.78790  -0.00005   0.00086   0.00463   0.00547  -1.78242
   D79       -2.89436   0.00010   0.00233   0.00962   0.01197  -2.88239
   D80        0.28487   0.00011   0.00255   0.01069   0.01325   0.29812
   D81       -3.10417   0.00000   0.00037   0.00113   0.00151  -3.10267
   D82        0.05231   0.00001   0.00068   0.00210   0.00277   0.05508
   D83        0.00017   0.00000   0.00015   0.00008   0.00022   0.00039
   D84       -3.12654   0.00000   0.00045   0.00104   0.00149  -3.12505
   D85        3.09502   0.00001  -0.00079  -0.00135  -0.00214   3.09288
   D86       -0.04849  -0.00002  -0.00042  -0.00197  -0.00239  -0.05088
   D87       -0.00948   0.00002  -0.00058  -0.00033  -0.00091  -0.01039
   D88        3.13019  -0.00001  -0.00021  -0.00094  -0.00115   3.12904
   D89        0.00785   0.00000   0.00029   0.00054   0.00082   0.00868
   D90       -3.13570   0.00000   0.00013   0.00047   0.00060  -3.13510
   D91        3.13442  -0.00001  -0.00003  -0.00045  -0.00048   3.13394
   D92       -0.00914   0.00000  -0.00018  -0.00052  -0.00070  -0.00984
   D93       -0.00658   0.00000  -0.00029  -0.00090  -0.00119  -0.00777
   D94        3.13962   0.00000  -0.00019  -0.00056  -0.00075   3.13887
   D95        3.13698  -0.00001  -0.00014  -0.00083  -0.00097   3.13601
   D96        0.00000  -0.00001  -0.00004  -0.00049  -0.00053  -0.00053
   D97       -0.00269   0.00002  -0.00013   0.00064   0.00051  -0.00218
   D98       -3.13337   0.00001   0.00022   0.00076   0.00098  -3.13240
   D99        3.13429   0.00002  -0.00024   0.00031   0.00007   3.13436
   D100       0.00361   0.00000   0.00011   0.00042   0.00054   0.00414
   D101       0.01079  -0.00002   0.00057  -0.00003   0.00054   0.01133
   D102      -3.12888   0.00000   0.00020   0.00059   0.00079  -3.12809
   D103       3.14152  -0.00001   0.00023  -0.00015   0.00007   3.14159
   D104       0.00185   0.00002  -0.00014   0.00046   0.00032   0.00217
   D105       2.40567   0.00002   0.00142   0.00850   0.00992   2.41559
   D106      -0.77362   0.00001   0.00122   0.00706   0.00827  -0.76534
   D107      -1.78397  -0.00002   0.00061   0.00610   0.00669  -1.77728
   D108       1.31993  -0.00003   0.00041   0.00465   0.00505   1.32497
   D109       0.28855   0.00010   0.00221   0.01145   0.01367   0.30222
   D110      -2.89074   0.00009   0.00200   0.01001   0.01203  -2.87871
   D111       3.09514   0.00001  -0.00076  -0.00174  -0.00251   3.09264
   D112      -0.04831  -0.00001  -0.00035  -0.00173  -0.00208  -0.05039
   D113      -0.00931   0.00001  -0.00056  -0.00035  -0.00091  -0.01022
   D114       3.13043   0.00000  -0.00015  -0.00033  -0.00049   3.12994
   D115      -3.10395   0.00001   0.00036   0.00136   0.00172  -3.10223
   D116       0.05262   0.00001   0.00067   0.00206   0.00273   0.05535
   D117       0.00035  -0.00001   0.00016  -0.00009   0.00007   0.00042
   D118      -3.12626  -0.00001   0.00046   0.00062   0.00107  -3.12519
   D119       0.01047  -0.00002   0.00056   0.00029   0.00085   0.01132
   D120       3.14141  -0.00001   0.00022  -0.00008   0.00013   3.14155
   D121      -3.12926   0.00000   0.00015   0.00028   0.00042  -3.12884
   D122       0.00168   0.00001  -0.00019  -0.00010  -0.00029   0.00139
   D123      -0.00259   0.00001  -0.00014   0.00020   0.00006  -0.00253
   D124       3.13447   0.00001  -0.00023   0.00015  -0.00008   3.13439
   D125      -3.13349   0.00000   0.00020   0.00057   0.00077  -3.13271
   D126       0.00358   0.00000   0.00012   0.00051   0.00063   0.00420
   D127      -0.00632   0.00000  -0.00027  -0.00064  -0.00090  -0.00723
   D128       3.13700   0.00000  -0.00012  -0.00040  -0.00052   3.13649
   D129       3.13980   0.00000  -0.00018  -0.00058  -0.00076   3.13904
   D130      -0.00006   0.00000  -0.00003  -0.00034  -0.00037  -0.00043
   D131       0.00746   0.00000   0.00026   0.00058   0.00083   0.00829
   D132       3.13393   0.00000  -0.00005  -0.00016  -0.00021   3.13372
   D133      -3.13587   0.00000   0.00011   0.00034   0.00045  -3.13542
   D134      -0.00940   0.00000  -0.00020  -0.00039  -0.00059  -0.00999
         Item               Value     Threshold  Converged?
 Maximum Force            0.002505     0.000450     NO 
 RMS     Force            0.000284     0.000300     YES
 Maximum Displacement     0.417266     0.001800     NO 
 RMS     Displacement     0.085416     0.001200     NO 
 Predicted change in Energy=-2.064773D-04
 GradGradGradGradGradGradGradGradGradGradGradGradGradGradGradGradGradGrad

 Stoichiometry    C29H24O3
 Framework group  C1[X(C29H24O3)]
 Deg. of freedom   162
 Full point group                 C1      NOp   1
 Largest Abelian subgroup         C1      NOp   1
 Largest concise Abelian subgroup C1      NOp   1
                         Standard orientation:                         
 ---------------------------------------------------------------------
 Center     Atomic     Atomic              Coordinates (Angstroms)
 Number     Number      Type              X           Y           Z
 ---------------------------------------------------------------------
    1          6             0       -2.784745   -0.167397   -0.140587
    2          6             0       -4.064913   -0.688935   -0.141335
    3          6             0       -5.174643    0.155168    0.037971
    4          6             0       -4.975749    1.529721    0.217930
    5          6             0       -3.679392    2.038034    0.213819
    6          6             0       -2.553983    1.215131    0.037795
    7          8             0       -6.388167   -0.465484    0.024131
    8          6             0       -1.231582    1.819601    0.047533
    9          6             0       -0.030515    1.214267   -0.073712
   10          6             0        1.207370    2.022715   -0.056267
   11          6             0        2.532843    1.332640   -0.059986
   12          6             0        3.678559    2.127607   -0.204870
   13          6             0        4.954986    1.577040   -0.210438
   14          6             0        5.107441    0.191115   -0.053510
   15          6             0        3.973494   -0.619331    0.104466
   16          6             0        2.707255   -0.054486    0.098544
   17          8             0        6.302208   -0.465589   -0.041116
   18          6             0       -7.564879    0.339484    0.162960
   19          6             0       -8.777072   -0.549652    0.053768
   20          6             0       -8.852340   -1.536267   -0.936955
   21          6             0       -9.995545   -2.323369   -1.060855
   22          6             0      -11.080431   -2.127193   -0.203611
   23          6             0      -11.012261   -1.145636    0.784490
   24          6             0       -9.862458   -0.365861    0.915558
   25          8             0        1.159928    3.253290    0.041712
   26          6             0        7.503778    0.306630   -0.147132
   27          6             0        8.687517   -0.620345   -0.036833
   28          6             0        9.793526   -0.449674   -0.874733
   29          6             0       10.917601   -1.265713   -0.740951
   30          6             0       10.938992   -2.270478    0.225723
   31          6             0        9.833390   -2.453194    1.059121
   32          6             0        8.715926   -1.630311    0.932581
   33          1             0       -1.945031   -0.840433   -0.283670
   34          1             0       -4.242649   -1.750700   -0.279273
   35          1             0       -5.812045    2.202942    0.361994
   36          1             0       -3.531039    3.105820    0.352952
   37          1             0       -1.197159    2.902146    0.168338
   38          1             0        0.045126    0.140778   -0.206943
   39          1             0        3.538302    3.198066   -0.313412
   40          1             0        5.815329    2.223315   -0.337270
   41          1             0        4.115488   -1.687418    0.234318
   42          1             0        1.852212   -0.705970    0.243481
   43          1             0       -7.570174    1.105323   -0.628347
   44          1             0       -7.553064    0.861314    1.129867
   45          1             0       -8.004713   -1.691291   -1.597350
   46          1             0      -10.041445   -3.090308   -1.829097
   47          1             0      -11.971943   -2.739997   -0.303179
   48          1             0      -11.848524   -0.992482    1.460853
   49          1             0       -9.807867    0.390261    1.695445
   50          1             0        7.520284    1.056964    0.658514
   51          1             0        7.523153    0.846686   -1.103749
   52          1             0        9.775231    0.325351   -1.637557
   53          1             0       11.770303   -1.122369   -1.398725
   54          1             0       11.810377   -2.911321    0.327216
   55          1             0        9.842993   -3.237699    1.810804
   56          1             0        7.852081   -1.774580    1.574061
 ---------------------------------------------------------------------
 Rotational constants (GHZ):      0.4747392      0.0244136      0.0234608
 Standard basis: 6-31G(d,p) (6D, 7F)
 There are   600 symmetry adapted basis functions of A   symmetry.
 Integral buffers will be    262144 words long.
 Raffenetti 2 integral format.
 Two-electron integral symmetry is turned on.
   600 basis functions,  1064 primitive gaussians,   600 cartesian basis functions
   111 alpha electrons      111 beta electrons
       nuclear repulsion energy      2501.7734306229 Hartrees.
 NAtoms=   56 NActive=   56 NUniq=   56 SFac= 1.00D+00 NAtFMM=   60 Big=F
 One-electron integrals computed using PRISM.
 NBasis=   600 RedAO= T  NBF=   600
 NBsUse=   600 1.00D-06 NBFU=   600
 Initial guess read from the read-write file:
 Initial guess orbital symmetries:
       Occupied  (A) (A) (A) (A) (A) (A) (A) (A) (A) (A) (A) (A)
                 (A) (A) (A) (A) (A) (A) (A) (A) (A) (A) (A) (A)
                 (A) (A) (A) (A) (A) (A) (A) (A) (A) (A) (A) (A)
                 (A) (A) (A) (A) (A) (A) (A) (A) (A) (A) (A) (A)
                 (A) (A) (A) (A) (A) (A) (A) (A) (A) (A) (A) (A)
                 (A) (A) (A) (A) (A) (A) (A) (A) (A) (A) (A) (A)
                 (A) (A) (A) (A) (A) (A) (A) (A) (A) (A) (A) (A)
                 (A) (A) (A) (A) (A) (A) (A) (A) (A) (A) (A) (A)
                 (A) (A) (A) (A) (A) (A) (A) (A) (A) (A) (A) (A)
                 (A) (A) (A)
       Virtual   (A) (A) (A) (A) (A) (A) (A) (A) (A) (A) (A) (A)
                 (A) (A) (A) (A) (A) (A) (A) (A) (A) (A) (A) (A)
                 (A) (A) (A) (A) (A) (A) (A) (A) (A) (A) (A) (A)
                 (A) (A) (A) (A) (A) (A) (A) (A) (A) (A) (A) (A)
                 (A) (A) (A) (A) (A) (A) (A) (A) (A) (A) (A) (A)
                 (A) (A) (A) (A) (A) (A) (A) (A) (A) (A) (A) (A)
                 (A) (A) (A) (A) (A) (A) (A) (A) (A) (A) (A) (A)
                 (A) (A) (A) (A) (A) (A) (A) (A) (A) (A) (A) (A)
                 (A) (A) (A) (A) (A) (A) (A) (A) (A) (A) (A) (A)
                 (A) (A) (A) (A) (A) (A) (A) (A) (A) (A) (A) (A)
                 (A) (A) (A) (A) (A) (A) (A) (A) (A) (A) (A) (A)
                 (A) (A) (A) (A) (A) (A) (A) (A) (A) (A) (A) (A)
                 (A) (A) (A) (A) (A) (A) (A) (A) (A) (A) (A) (A)
                 (A) (A) (A) (A) (A) (A) (A) (A) (A) (A) (A) (A)
                 (A) (A) (A) (A) (A) (A) (A) (A) (A) (A) (A) (A)
                 (A) (A) (A) (A) (A) (A) (A) (A) (A) (A) (A) (A)
                 (A) (A) (A) (A) (A) (A) (A) (A) (A) (A) (A) (A)
                 (A) (A) (A) (A) (A) (A) (A) (A) (A) (A) (A) (A)
                 (A) (A) (A) (A) (A) (A) (A) (A) (A) (A) (A) (A)
                 (A) (A) (A) (A) (A) (A) (A) (A) (A) (A) (A) (A)
                 (A) (A) (A) (A) (A) (A) (A) (A) (A) (A) (A) (A)
                 (A) (A) (A) (A) (A) (A) (A) (A) (A) (A) (A) (A)
                 (A) (A) (A) (A) (A) (A) (A) (A) (A) (A) (A) (A)
                 (A) (A) (A) (A) (A) (A) (A) (A) (A) (A) (A) (A)
                 (A) (A) (A) (A) (A) (A) (A) (A) (A) (A) (A) (A)
                 (A) (A) (A) (A) (A) (A) (A) (A) (A) (A) (A) (A)
                 (A) (A) (A) (A) (A) (A) (A) (A) (A) (A) (A) (A)
                 (A) (A) (A) (A) (A) (A) (A) (A) (A) (A) (A) (A)
                 (A) (A) (A) (A) (A) (A) (A) (A) (A) (A) (A) (A)
                 (A) (A) (A) (A) (A) (A) (A) (A) (A) (A) (A) (A)
                 (A) (A) (A) (A) (A) (A) (A) (A) (A) (A) (A) (A)
                 (A) (A) (A) (A) (A) (A) (A) (A) (A) (A) (A) (A)
                 (A) (A) (A) (A) (A) (A) (A) (A) (A) (A) (A) (A)
                 (A) (A) (A) (A) (A) (A) (A) (A) (A) (A) (A) (A)
                 (A) (A) (A) (A) (A) (A) (A) (A) (A) (A) (A) (A)
                 (A) (A) (A) (A) (A) (A) (A) (A) (A) (A) (A) (A)
                 (A) (A) (A) (A) (A) (A) (A) (A) (A) (A) (A) (A)
                 (A) (A) (A) (A) (A) (A) (A) (A) (A) (A) (A) (A)
                 (A) (A) (A) (A) (A) (A) (A) (A) (A) (A) (A) (A)
                 (A) (A) (A) (A) (A) (A) (A) (A) (A) (A) (A) (A)
                 (A) (A) (A) (A) (A) (A) (A) (A) (A)
 Harris functional with IExCor=  402 diagonalized for initial guess.
 ExpMin= 1.61D-01 ExpMax= 5.48D+03 ExpMxC= 8.25D+02 IAcc=1 IRadAn=         1 AccDes= 1.00D-06
 HarFok:  IExCor= 402 AccDes= 1.00D-06 IRadAn=         1 IDoV=1
 ScaDFX=  1.000000  1.000000  1.000000  1.000000
 Requested convergence on RMS density matrix=1.00D-08 within 128 cycles.
 Requested convergence on MAX density matrix=1.00D-06.
 Requested convergence on             energy=1.00D-06.
 No special actions if energy rises.
 Integral accuracy reduced to 1.0D-05 until final iterations.
 Initial convergence to 1.0D-05 achieved.  Increase integral accuracy.
 SCF Done:  E(RB+HF-LYP) =  -1345.22789870     A.U. after   15 cycles
             Convg  =    0.9655D-08             -V/T =  2.0096
             S**2   =   0.0000
 ***** Axes restored to original set *****
 -------------------------------------------------------------------
 Center     Atomic                   Forces (Hartrees/Bohr)
 Number     Number              X              Y              Z
 -------------------------------------------------------------------
    1          6          -0.000406904    0.000004444   -0.000643972
    2          6          -0.000610924   -0.000038817   -0.000251733
    3          6          -0.000255252   -0.000057285    0.001670519
    4          6          -0.000048970    0.000019092    0.001463905
    5          6          -0.000201179   -0.000031914   -0.001487304
    6          6           0.000404702   -0.000214855    0.002113659
    7          8           0.002007188    0.000153991   -0.001370172
    8          6          -0.000143889    0.000122334   -0.002390191
    9          6          -0.000720344    0.003247103    0.002062038
   10          6           0.006047423   -0.010376966   -0.001856751
   11          6          -0.001029883    0.002481129   -0.000688695
   12          6           0.000470815    0.000417204    0.000397106
   13          6          -0.000671877   -0.000138917   -0.000776088
   14          6          -0.001616320   -0.000433371   -0.000584696
   15          6          -0.000281338   -0.000406117    0.000389241
   16          6           0.000169802    0.000341413    0.000544302
   17          8           0.002231403    0.000782811   -0.000625202
   18          6          -0.000647285   -0.000044988   -0.001422414
   19          6           0.000343114   -0.000005737    0.000437466
   20          6          -0.000253399    0.000174321   -0.000345015
   21          6          -0.000402406    0.000363772    0.000015532
   22          6          -0.000031076   -0.000074603    0.000617841
   23          6           0.000190421   -0.000363007    0.000502525
   24          6           0.000361272   -0.000077907   -0.000403807
   25          8          -0.003420086    0.004069170    0.000926334
   26          6           0.000497792    0.000070719    0.001349614
   27          6          -0.000067698    0.000030183   -0.000462757
   28          6           0.000508306    0.000234856   -0.000007287
   29          6          -0.000347144    0.000345331   -0.000398997
   30          6          -0.000477224   -0.000073872   -0.000432966
   31          6          -0.000143841   -0.000466502    0.000246567
   32          6           0.000119384   -0.000186336    0.000361228
   33          1           0.000068357   -0.000008226    0.000086269
   34          1           0.000238804   -0.000002410   -0.000219937
   35          1          -0.000079539    0.000008334   -0.000145445
   36          1          -0.000117114   -0.000029122    0.000219511
   37          1          -0.000208979   -0.000014627    0.000473593
   38          1           0.000101668    0.000156208    0.000147727
   39          1          -0.000331719   -0.000024012   -0.000109655
   40          1           0.000086148   -0.000083145    0.000206310
   41          1           0.000301904    0.000085396   -0.000066331
   42          1          -0.000185578    0.000304587   -0.000179704
   43          1          -0.000271357   -0.000457228    0.000416522
   44          1          -0.000319832    0.000350836    0.000375685
   45          1           0.000100120   -0.000052207    0.000255993
   46          1           0.000176140   -0.000120089   -0.000092271
   47          1           0.000053488   -0.000000480   -0.000231285
   48          1          -0.000129762    0.000136715   -0.000144195
   49          1          -0.000169394    0.000131792    0.000166001
   50          1          -0.000594590    0.000256023   -0.000052197
   51          1          -0.000360446   -0.000479472   -0.000066734
   52          1          -0.000204833   -0.000178147   -0.000017360
   53          1           0.000069056   -0.000146180    0.000174240
   54          1           0.000197714    0.000055020    0.000121389
   55          1           0.000132107    0.000193581   -0.000041056
   56          1          -0.000126944    0.000050173   -0.000226899
 -------------------------------------------------------------------
 Cartesian Forces:  Max     0.010376966 RMS     0.001213839

 GradGradGradGradGradGradGradGradGradGradGradGradGradGradGradGradGradGrad
 Berny optimization.
 Internal  Forces:  Max     0.003009973 RMS     0.000506428
 Search for a local minimum.
 Step number   4 out of a maximum of 298
 All quantities printed in internal units (Hartrees-Bohrs-Radians)
 Update second derivatives using D2CorX and points  1  2  4  3
 Trust test=-1.65D+00 RLast= 1.98D-01 DXMaxT set to 2.12D-01
 Energy Rises -- skip Quadratic search.
 Quartic linear search produced a step of -0.72938.
 Iteration  1 RMS(Cart)=  0.06075340 RMS(Int)=  0.00098855
 Iteration  2 RMS(Cart)=  0.00266008 RMS(Int)=  0.00003371
 Iteration  3 RMS(Cart)=  0.00000273 RMS(Int)=  0.00003370
 Iteration  4 RMS(Cart)=  0.00000000 RMS(Int)=  0.00003370
 Variable       Old X    -DE/DX   Delta X   Delta X   Delta X     New X
                                 (Linear)    (Quad)   (Total)
    R1        2.61222   0.00027   0.00053   0.00000   0.00053   2.61275
    R2        2.67011  -0.00003   0.00039   0.00000   0.00039   2.67050
    R3        2.05153  -0.00010   0.00001   0.00000   0.00001   2.05154
    R4        2.65650   0.00086   0.00244   0.00000   0.00244   2.65894
    R5        2.05099  -0.00032  -0.00009   0.00000  -0.00009   2.05090
    R6        2.64652  -0.00032  -0.00070   0.00000  -0.00070   2.64582
    R7        2.57588  -0.00130  -0.00419   0.00000  -0.00419   2.57169
    R8        2.63137   0.00102   0.00343   0.00000   0.00343   2.63480
    R9        2.04699  -0.00014   0.00031   0.00000   0.00031   2.04730
   R10        2.65552  -0.00034  -0.00258   0.00000  -0.00258   2.65293
   R11        2.05410  -0.00021  -0.00005   0.00000  -0.00005   2.05405
   R12        2.74773   0.00158   0.00650   0.00000   0.00650   2.75423
   R13        2.70693  -0.00076  -0.00761   0.00000  -0.00761   2.69931
   R14        2.55196  -0.00049  -0.00234   0.00000  -0.00234   2.54962
   R15        2.05944  -0.00039  -0.00038   0.00000  -0.00038   2.05906
   R16        2.79414   0.00189   0.00948   0.00000   0.00948   2.80362
   R17        2.04916  -0.00006   0.00011   0.00000   0.00011   2.04927
   R18        2.82392   0.00140   0.00530   0.00000   0.00530   2.82922
   R19        2.33453  -0.00301  -0.00740   0.00000  -0.00740   2.32713
   R20        2.64941   0.00026  -0.00116   0.00000  -0.00116   2.64825
   R21        2.65886   0.00018   0.00063   0.00000   0.00063   2.65949
   R22        2.62694   0.00075   0.00233   0.00000   0.00233   2.62926
   R23        2.05045  -0.00028   0.00017   0.00000   0.00017   2.05062
   R24        2.65145  -0.00013   0.00034   0.00000   0.00034   2.65179
   R25        2.04750  -0.00019   0.00024   0.00000   0.00024   2.04773
   R26        2.65075   0.00057   0.00187   0.00000   0.00187   2.65262
   R27        2.57647  -0.00112  -0.00479   0.00000  -0.00479   2.57168
   R28        2.62015   0.00048   0.00081   0.00000   0.00081   2.62096
   R29        2.05088  -0.00032  -0.00013   0.00000  -0.00013   2.05075
   R30        2.04975  -0.00019   0.00012   0.00000   0.00012   2.04988
   R31        2.70655  -0.00070  -0.00723   0.00000  -0.00723   2.69933
   R32        2.84835   0.00070   0.00340   0.00000   0.00340   2.85175
   R33        2.08102  -0.00062  -0.00028   0.00000  -0.00028   2.08074
   R34        2.07643  -0.00054  -0.00014   0.00000  -0.00014   2.07629
   R35        2.64603   0.00030   0.00092   0.00000   0.00092   2.64694
   R36        2.64192   0.00023  -0.00022   0.00000  -0.00022   2.64170
   R37        2.63330   0.00022   0.00043   0.00000   0.00043   2.63373
   R38        2.05157  -0.00025   0.00005   0.00000   0.00005   2.05162
   R39        2.63908   0.00038   0.00141   0.00000   0.00141   2.64049
   R40        2.05320  -0.00023  -0.00008   0.00000  -0.00008   2.05312
   R41        2.63510   0.00020   0.00030   0.00000   0.00030   2.63540
   R42        2.05297  -0.00024  -0.00010   0.00000  -0.00010   2.05287
   R43        2.63701   0.00046   0.00161   0.00000   0.00161   2.63863
   R44        2.05299  -0.00024  -0.00010   0.00000  -0.00010   2.05289
   R45        2.05531  -0.00026  -0.00013   0.00000  -0.00013   2.05518
   R46        2.84884   0.00066   0.00321   0.00000   0.00321   2.85205
   R47        2.08071  -0.00059  -0.00028   0.00000  -0.00028   2.08042
   R48        2.07625  -0.00053  -0.00016   0.00000  -0.00016   2.07609
   R49        2.64187   0.00026  -0.00014   0.00000  -0.00014   2.64173
   R50        2.64602   0.00029   0.00092   0.00000   0.00092   2.64694
   R51        2.63707   0.00043   0.00161   0.00000   0.00161   2.63868
   R52        2.05529  -0.00025  -0.00010   0.00000  -0.00010   2.05518
   R53        2.63511   0.00021   0.00034   0.00000   0.00034   2.63546
   R54        2.05304  -0.00024  -0.00011   0.00000  -0.00011   2.05293
   R55        2.63906   0.00039   0.00136   0.00000   0.00136   2.64041
   R56        2.05302  -0.00024  -0.00011   0.00000  -0.00011   2.05291
   R57        2.63336   0.00022   0.00039   0.00000   0.00039   2.63374
   R58        2.05326  -0.00024  -0.00009   0.00000  -0.00009   2.05317
   R59        2.05150  -0.00024   0.00008   0.00000   0.00008   2.05157
    A1        2.11821  -0.00017  -0.00075   0.00000  -0.00075   2.11746
    A2        2.07413   0.00004  -0.00048   0.00000  -0.00048   2.07365
    A3        2.09084   0.00013   0.00123   0.00000   0.00123   2.09207
    A4        2.09955   0.00015   0.00021   0.00000   0.00021   2.09977
    A5        2.11861  -0.00014  -0.00034   0.00000  -0.00034   2.11826
    A6        2.06502  -0.00001   0.00013   0.00000   0.00013   2.06515
    A7        2.08705  -0.00019  -0.00074   0.00000  -0.00074   2.08630
    A8        2.01318   0.00063   0.00299   0.00000   0.00299   2.01616
    A9        2.18295  -0.00044  -0.00224   0.00000  -0.00224   2.18071
   A10        2.08303  -0.00004   0.00055   0.00000   0.00055   2.08358
   A11        2.11465   0.00011   0.00059   0.00000   0.00059   2.11525
   A12        2.08550  -0.00007  -0.00114   0.00000  -0.00114   2.08436
   A13        2.13199   0.00002  -0.00099   0.00000  -0.00099   2.13099
   A14        2.07748  -0.00014  -0.00187   0.00000  -0.00187   2.07561
   A15        2.07371   0.00012   0.00287   0.00000   0.00287   2.07658
   A16        2.04654   0.00023   0.00173   0.00000   0.00173   2.04827
   A17        2.16053  -0.00033  -0.00223   0.00000  -0.00223   2.15830
   A18        2.07611   0.00011   0.00051   0.00000   0.00051   2.07662
   A19        2.06516   0.00129   0.00448   0.00000   0.00448   2.06964
   A20        2.24199  -0.00045  -0.00236   0.00000  -0.00236   2.23964
   A21        2.02909  -0.00013  -0.00471   0.00000  -0.00471   2.02438
   A22        2.01210   0.00058   0.00706   0.00000   0.00706   2.01917
   A23        2.09261   0.00053   0.00038   0.00000   0.00038   2.09299
   A24        2.11393  -0.00044   0.00223   0.00000   0.00223   2.11616
   A25        2.07640  -0.00009  -0.00263   0.00000  -0.00263   2.07376
   A26        2.08296  -0.00036  -0.00613   0.00000  -0.00580   2.07717
   A27        2.10997   0.00036   0.00307   0.00000   0.00340   2.11337
   A28        2.08777   0.00027   0.00454   0.00000   0.00487   2.09264
   A29        2.05246   0.00047   0.00174   0.00000   0.00174   2.05420
   A30        2.17115  -0.00018  -0.00246   0.00000  -0.00246   2.16869
   A31        2.05935  -0.00029   0.00067   0.00000   0.00067   2.06002
   A32        2.12493   0.00017  -0.00080   0.00000  -0.00080   2.12412
   A33        2.05341   0.00011   0.00407   0.00000   0.00407   2.05749
   A34        2.10485  -0.00029  -0.00327   0.00000  -0.00327   2.10158
   A35        2.08350   0.00012   0.00093   0.00000   0.00093   2.08443
   A36        2.08672  -0.00017  -0.00095   0.00000  -0.00095   2.08577
   A37        2.11296   0.00006   0.00001   0.00000   0.00001   2.11298
   A38        2.08916  -0.00028  -0.00088   0.00000  -0.00088   2.08828
   A39        2.17974  -0.00040  -0.00258   0.00000  -0.00258   2.17716
   A40        2.01428   0.00068   0.00346   0.00000   0.00346   2.01774
   A41        2.09718   0.00015  -0.00015   0.00000  -0.00015   2.09703
   A42        2.06727  -0.00006   0.00035   0.00000   0.00035   2.06761
   A43        2.11873  -0.00009  -0.00019   0.00000  -0.00019   2.11854
   A44        2.11217   0.00012   0.00022   0.00000   0.00022   2.11239
   A45        2.10537   0.00008  -0.00066   0.00000  -0.00066   2.10471
   A46        2.06536  -0.00021   0.00041   0.00000   0.00041   2.06578
   A47        2.06553   0.00152   0.00580   0.00000   0.00580   2.07133
   A48        1.89878   0.00056   0.00206   0.00000   0.00206   1.90083
   A49        1.90193   0.00002   0.00305   0.00000   0.00305   1.90497
   A50        1.92126  -0.00002   0.00327   0.00000   0.00327   1.92452
   A51        1.93298  -0.00041  -0.00397   0.00000  -0.00397   1.92900
   A52        1.93108  -0.00034  -0.00370   0.00000  -0.00369   1.92739
   A53        1.87769   0.00017  -0.00064   0.00000  -0.00063   1.87706
   A54        2.10614   0.00001  -0.00070   0.00000  -0.00070   2.10544
   A55        2.09690   0.00008   0.00061   0.00000   0.00061   2.09751
   A56        2.07951  -0.00010   0.00012   0.00000   0.00012   2.07962
   A57        2.10019   0.00005   0.00007   0.00000   0.00007   2.10026
   A58        2.08179   0.00009   0.00093   0.00000   0.00093   2.08272
   A59        2.10109  -0.00014  -0.00099   0.00000  -0.00099   2.10010
   A60        2.09831   0.00005  -0.00002   0.00000  -0.00002   2.09829
   A61        2.09006  -0.00005   0.00009   0.00000   0.00009   2.09015
   A62        2.09482  -0.00001  -0.00007   0.00000  -0.00007   2.09475
   A63        2.08963  -0.00006  -0.00018   0.00000  -0.00018   2.08945
   A64        2.09670   0.00003  -0.00019   0.00000  -0.00019   2.09651
   A65        2.09685   0.00004   0.00037   0.00000   0.00037   2.09721
   A66        2.09461  -0.00002   0.00003   0.00000   0.00003   2.09463
   A67        2.09759   0.00000   0.00036   0.00000   0.00036   2.09794
   A68        2.09094   0.00002  -0.00038   0.00000  -0.00038   2.09055
   A69        2.10405   0.00008   0.00000   0.00000   0.00000   2.10404
   A70        2.08799   0.00005   0.00090   0.00000   0.00090   2.08888
   A71        2.09115  -0.00013  -0.00089   0.00000  -0.00089   2.09026
   A72        1.89843   0.00056   0.00153   0.00000   0.00152   1.89995
   A73        1.90269   0.00003   0.00303   0.00000   0.00303   1.90572
   A74        1.92225  -0.00002   0.00317   0.00000   0.00317   1.92543
   A75        1.93234  -0.00040  -0.00382   0.00000  -0.00382   1.92852
   A76        1.93061  -0.00036  -0.00347   0.00000  -0.00347   1.92714
   A77        1.87742   0.00018  -0.00037   0.00000  -0.00037   1.87705
   A78        2.09703   0.00006   0.00078   0.00000   0.00078   2.09781
   A79        2.10610   0.00005  -0.00078   0.00000  -0.00078   2.10532
   A80        2.07939  -0.00011   0.00004   0.00000   0.00004   2.07944
   A81        2.10414   0.00008  -0.00002   0.00000  -0.00002   2.10412
   A82        2.08754   0.00008   0.00109   0.00000   0.00109   2.08863
   A83        2.09150  -0.00016  -0.00107   0.00000  -0.00107   2.09043
   A84        2.09460  -0.00001   0.00009   0.00000   0.00009   2.09469
   A85        2.09096   0.00001  -0.00045   0.00000  -0.00045   2.09051
   A86        2.09757  -0.00001   0.00036   0.00000   0.00036   2.09793
   A87        2.08958  -0.00008  -0.00025   0.00000  -0.00025   2.08933
   A88        2.09682   0.00004   0.00041   0.00000   0.00041   2.09723
   A89        2.09678   0.00003  -0.00016   0.00000  -0.00016   2.09662
   A90        2.09833   0.00005   0.00001   0.00000   0.00001   2.09834
   A91        2.09476   0.00000  -0.00006   0.00000  -0.00006   2.09471
   A92        2.09009  -0.00005   0.00005   0.00000   0.00005   2.09014
   A93        2.10026   0.00006   0.00014   0.00000   0.00014   2.10040
   A94        2.08152   0.00007   0.00109   0.00000   0.00109   2.08261
   A95        2.10130  -0.00013  -0.00122   0.00000  -0.00122   2.10008
    D1       -0.00052   0.00001   0.00060   0.00000   0.00060   0.00007
    D2        3.14056  -0.00002   0.00023   0.00000   0.00023   3.14078
    D3       -3.13885   0.00003   0.00093   0.00000   0.00093  -3.13792
    D4        0.00223   0.00000   0.00056   0.00000   0.00056   0.00279
    D5       -0.00046   0.00003  -0.00078   0.00000  -0.00078  -0.00124
    D6       -3.14149   0.00007  -0.00038   0.00000  -0.00038   3.14132
    D7        3.13783   0.00001  -0.00112   0.00000  -0.00112   3.13672
    D8       -0.00320   0.00005  -0.00072   0.00000  -0.00072  -0.00392
    D9       -0.00021  -0.00003   0.00005   0.00000   0.00005  -0.00017
   D10       -3.13806  -0.00006  -0.00050   0.00000  -0.00050  -3.13856
   D11       -3.14131  -0.00001   0.00040   0.00000   0.00040  -3.14090
   D12        0.00403  -0.00004  -0.00014   0.00000  -0.00014   0.00389
   D13        0.00193   0.00002  -0.00048   0.00000  -0.00048   0.00146
   D14       -3.13756  -0.00001  -0.00068   0.00000  -0.00068  -3.13824
   D15        3.13939   0.00005   0.00013   0.00000   0.00013   3.13953
   D16       -0.00010   0.00003  -0.00007   0.00000  -0.00007  -0.00017
   D17       -3.11095  -0.00002  -0.00084   0.00000  -0.00084  -3.11179
   D18        0.03462  -0.00005  -0.00142   0.00000  -0.00142   0.03320
   D19       -0.00301   0.00002   0.00028   0.00000   0.00028  -0.00273
   D20        3.14053  -0.00002   0.00008   0.00000   0.00008   3.14061
   D21        3.13651   0.00004   0.00048   0.00000   0.00048   3.13700
   D22       -0.00313   0.00000   0.00028   0.00000   0.00028  -0.00284
   D23        0.00225  -0.00004   0.00034   0.00000   0.00034   0.00259
   D24       -3.13988  -0.00008  -0.00004   0.00000  -0.00004  -3.13992
   D25       -3.14129  -0.00001   0.00053   0.00000   0.00053  -3.14076
   D26       -0.00023  -0.00004   0.00015   0.00000   0.00015  -0.00008
   D27       -0.02770  -0.00006  -0.00851   0.00000  -0.00851  -0.03621
   D28        3.11422   0.00000  -0.00818   0.00000  -0.00818   3.10604
   D29        3.11446  -0.00002  -0.00810   0.00000  -0.00810   3.10636
   D30       -0.02680   0.00004  -0.00778   0.00000  -0.00778  -0.03458
   D31        3.09547  -0.00010   0.00185   0.00000   0.00185   3.09732
   D32        0.98629   0.00004   0.00361   0.00000   0.00361   0.98990
   D33       -1.06904  -0.00017   0.00064   0.00000   0.00064  -1.06840
   D34        3.12687   0.00013  -0.00009   0.00000  -0.00009   3.12677
   D35        0.00953   0.00005   0.00088   0.00000   0.00088   0.01041
   D36       -0.01505   0.00007  -0.00042   0.00000  -0.00042  -0.01547
   D37       -3.13239  -0.00001   0.00055   0.00000   0.00055  -3.13184
   D38        3.04050   0.00192   0.01262   0.00000   0.01263   3.05313
   D39       -0.02511  -0.00228  -0.06606   0.00000  -0.06606  -0.09117
   D40       -0.12483   0.00199   0.01174   0.00000   0.01175  -0.11308
   D41        3.09275  -0.00221  -0.06694   0.00000  -0.06694   3.02581
   D42        3.01109  -0.00194  -0.06860   0.00000  -0.06859   2.94250
   D43       -0.15363  -0.00182  -0.07120   0.00000  -0.07119  -0.22482
   D44       -0.20550   0.00220   0.00909   0.00000   0.00908  -0.19642
   D45        2.91296   0.00232   0.00649   0.00000   0.00648   2.91944
   D46        3.13351  -0.00007  -0.00146   0.00000  -0.00146   3.13206
   D47       -0.00763   0.00000  -0.00156   0.00000  -0.00156  -0.00919
   D48        0.01354  -0.00018   0.00102   0.00000   0.00102   0.01456
   D49       -3.12761  -0.00011   0.00092   0.00000   0.00092  -3.12669
   D50       -3.12404   0.00009   0.00309   0.00000   0.00310  -3.12095
   D51       -0.00850   0.00011   0.00179   0.00000   0.00179  -0.00671
   D52       -0.00567   0.00022   0.00050   0.00000   0.00050  -0.00517
   D53        3.10987   0.00024  -0.00080   0.00000  -0.00080   3.10907
   D54       -0.01165   0.00006  -0.00130   0.00000  -0.00130  -0.01295
   D55        3.12823   0.00009   0.00007   0.00000   0.00007   3.12830
   D56        3.12948  -0.00002  -0.00119   0.00000  -0.00119   3.12829
   D57       -0.01383   0.00001   0.00018   0.00000   0.00018  -0.01365
   D58        0.00171   0.00003   0.00005   0.00000   0.00005   0.00176
   D59       -3.14094  -0.00002   0.00066   0.00000   0.00066  -3.14028
   D60       -3.13814   0.00000  -0.00134   0.00000  -0.00134  -3.13947
   D61        0.00239  -0.00005  -0.00073   0.00000  -0.00072   0.00167
   D62        0.00591   0.00000   0.00145   0.00000   0.00145   0.00736
   D63       -3.13095  -0.00007   0.00076   0.00000   0.00076  -3.13020
   D64       -3.13472   0.00005   0.00089   0.00000   0.00089  -3.13382
   D65        0.01160  -0.00003   0.00020   0.00000   0.00020   0.01181
   D66        0.04126  -0.00005  -0.00413   0.00000  -0.00413   0.03712
   D67       -3.10136  -0.00009  -0.00355   0.00000  -0.00355  -3.10490
   D68       -0.00386  -0.00013  -0.00174   0.00000  -0.00174  -0.00561
   D69       -3.11999  -0.00015  -0.00045   0.00000  -0.00045  -3.12044
   D70        3.13286  -0.00005  -0.00103   0.00000  -0.00103   3.13183
   D71        0.01673  -0.00008   0.00026   0.00000   0.00026   0.01699
   D72        3.08912  -0.00006   0.00193   0.00000   0.00193   3.09104
   D73        0.98047   0.00006   0.00383   0.00000   0.00383   0.98429
   D74       -1.07558  -0.00016   0.00059   0.00000   0.00059  -1.07499
   D75       -0.76973  -0.00002  -0.00568   0.00000  -0.00568  -0.77540
   D76        2.41078  -0.00001  -0.00661   0.00000  -0.00661   2.40417
   D77        1.32025   0.00012  -0.00306   0.00000  -0.00305   1.31720
   D78       -1.78242   0.00013  -0.00399   0.00000  -0.00399  -1.78641
   D79       -2.88239  -0.00014  -0.00873   0.00000  -0.00873  -2.89112
   D80        0.29812  -0.00014  -0.00966   0.00000  -0.00967   0.28846
   D81       -3.10267  -0.00001  -0.00110   0.00000  -0.00110  -3.10376
   D82        0.05508  -0.00003  -0.00202   0.00000  -0.00202   0.05306
   D83        0.00039  -0.00001  -0.00016   0.00000  -0.00016   0.00023
   D84       -3.12505  -0.00003  -0.00109   0.00000  -0.00109  -3.12613
   D85        3.09288   0.00004   0.00156   0.00000   0.00156   3.09444
   D86       -0.05088   0.00001   0.00174   0.00000   0.00174  -0.04914
   D87       -0.01039   0.00005   0.00066   0.00000   0.00066  -0.00973
   D88        3.12904   0.00001   0.00084   0.00000   0.00084   3.12987
   D89        0.00868  -0.00002  -0.00060   0.00000  -0.00060   0.00808
   D90       -3.13510  -0.00001  -0.00044   0.00000  -0.00044  -3.13554
   D91        3.13394   0.00000   0.00035   0.00000   0.00035   3.13429
   D92       -0.00984   0.00001   0.00051   0.00000   0.00051  -0.00933
   D93       -0.00777   0.00002   0.00087   0.00000   0.00087  -0.00690
   D94        3.13887   0.00001   0.00055   0.00000   0.00055   3.13942
   D95        3.13601   0.00001   0.00071   0.00000   0.00071   3.13672
   D96       -0.00053   0.00000   0.00039   0.00000   0.00039  -0.00014
   D97       -0.00218   0.00001  -0.00037   0.00000  -0.00037  -0.00255
   D98       -3.13240  -0.00002  -0.00071   0.00000  -0.00071  -3.13311
   D99        3.13436   0.00003  -0.00005   0.00000  -0.00005   3.13431
   D100       0.00414   0.00000  -0.00039   0.00000  -0.00039   0.00375
   D101       0.01133  -0.00005  -0.00040   0.00000  -0.00040   0.01094
   D102      -3.12809  -0.00001  -0.00058   0.00000  -0.00058  -3.12867
   D103       3.14159  -0.00002  -0.00005   0.00000  -0.00005   3.14154
   D104       0.00217   0.00001  -0.00023   0.00000  -0.00023   0.00194
   D105       2.41559  -0.00001  -0.00724   0.00000  -0.00724   2.40835
   D106      -0.76534  -0.00001  -0.00604   0.00000  -0.00604  -0.77138
   D107      -1.77728   0.00014  -0.00488   0.00000  -0.00488  -1.78216
   D108       1.32497   0.00014  -0.00368   0.00000  -0.00368   1.32130
   D109       0.30222  -0.00012  -0.00997   0.00000  -0.00998   0.29224
   D110      -2.87871  -0.00012  -0.00877   0.00000  -0.00878  -2.88749
   D111       3.09264   0.00004   0.00183   0.00000   0.00183   3.09446
   D112      -0.05039   0.00000   0.00152   0.00000   0.00152  -0.04887
   D113      -0.01022   0.00004   0.00066   0.00000   0.00066  -0.00955
   D114       3.12994   0.00000   0.00035   0.00000   0.00035   3.13030
   D115      -3.10223  -0.00001  -0.00125   0.00000  -0.00125  -3.10348
   D116       0.05535  -0.00003  -0.00199   0.00000  -0.00199   0.05336
   D117       0.00042  -0.00001  -0.00005   0.00000  -0.00005   0.00037
   D118      -3.12519  -0.00002  -0.00078   0.00000  -0.00078  -3.12597
   D119       0.01132  -0.00005  -0.00062   0.00000  -0.00062   0.01070
   D120       3.14155  -0.00002  -0.00010   0.00000  -0.00010   3.14145
   D121      -3.12884  -0.00001  -0.00031   0.00000  -0.00031  -3.12915
   D122       0.00139   0.00002   0.00021   0.00000   0.00021   0.00160
   D123      -0.00253   0.00003  -0.00005   0.00000  -0.00005  -0.00257
   D124       3.13439   0.00002   0.00006   0.00000   0.00006   3.13445
   D125      -3.13271   0.00000  -0.00056   0.00000  -0.00056  -3.13328
   D126       0.00420  -0.00001  -0.00046   0.00000  -0.00046   0.00375
   D127      -0.00723   0.00001   0.00066   0.00000   0.00066  -0.00657
   D128       3.13649   0.00000   0.00038   0.00000   0.00038   3.13686
   D129       3.13904   0.00001   0.00055   0.00000   0.00055   3.13959
   D130      -0.00043   0.00000   0.00027   0.00000   0.00027  -0.00016
   D131       0.00829  -0.00002  -0.00061   0.00000  -0.00061   0.00768
   D132       3.13372   0.00000   0.00015   0.00000   0.00015   3.13387
   D133      -3.13542  -0.00001  -0.00033   0.00000  -0.00033  -3.13575
   D134      -0.00999   0.00001   0.00043   0.00000   0.00043  -0.00956
         Item               Value     Threshold  Converged?
 Maximum Force            0.003010     0.000450     NO 
 RMS     Force            0.000506     0.000300     NO 
 Maximum Displacement     0.305374     0.001800     NO 
 RMS     Displacement     0.062100     0.001200     NO 
 Predicted change in Energy=-5.609187D-05
 GradGradGradGradGradGradGradGradGradGradGradGradGradGradGradGradGradGrad

 Stoichiometry    C29H24O3
 Framework group  C1[X(C29H24O3)]
 Deg. of freedom   162
 Full point group                 C1      NOp   1
 Largest Abelian subgroup         C1      NOp   1
 Largest concise Abelian subgroup C1      NOp   1
                         Standard orientation:                         
 ---------------------------------------------------------------------
 Center     Atomic     Atomic              Coordinates (Angstroms)
 Number     Number      Type              X           Y           Z
 ---------------------------------------------------------------------
    1          6             0        2.777188   -0.150070    0.128569
    2          6             0        4.054729   -0.678711    0.134497
    3          6             0        5.171079    0.160089   -0.038608
    4          6             0        4.979854    1.535511   -0.217375
    5          6             0        3.684582    2.051528   -0.219060
    6          6             0        2.555788    1.234211   -0.049723
    7          8             0        6.380901   -0.462794   -0.020005
    8          6             0        1.232722    1.845359   -0.064932
    9          6             0        0.030932    1.241425    0.041418
   10          6             0       -1.210061    2.054229    0.021485
   11          6             0       -2.534920    1.356936    0.025318
   12          6             0       -3.679143    2.133659    0.251945
   13          6             0       -4.952788    1.573686    0.262025
   14          6             0       -5.103424    0.198871    0.024649
   15          6             0       -3.969495   -0.592376   -0.217274
   16          6             0       -2.706413   -0.019456   -0.212905
   17          8             0       -6.294404   -0.459361    0.008040
   18          6             0        7.560621    0.331564   -0.152781
   19          6             0        8.769192   -0.565206   -0.041045
   20          6             0        8.838046   -1.549569    0.953066
   21          6             0        9.975989   -2.344318    1.079121
   22          6             0       11.062214   -2.158723    0.220005
   23          6             0       11.000393   -1.179423   -0.770973
   24          6             0        9.855410   -0.391344   -0.903658
   25          8             0       -1.164039    3.284720    0.004848
   26          6             0       -7.494767    0.290421    0.201284
   27          6             0       -8.676793   -0.638862    0.070667
   28          6             0       -9.752143   -0.537693    0.958156
   29          6             0      -10.874134   -1.355589    0.810092
   30          6             0      -10.923438   -2.292178   -0.222065
   31          6             0       -9.847827   -2.405006   -1.106729
   32          6             0       -8.733070   -1.580644   -0.964630
   33          1             0        1.933525   -0.818991    0.267722
   34          1             0        4.225663   -1.741586    0.272103
   35          1             0        5.819869    2.205476   -0.356097
   36          1             0        3.544750    3.120524   -0.357529
   37          1             0        1.208562    2.928916   -0.177036
   38          1             0       -0.049758    0.167142    0.165437
   39          1             0       -3.545292    3.197109    0.421336
   40          1             0       -5.812096    2.205546    0.453235
   41          1             0       -4.109062   -1.651326   -0.409172
   42          1             0       -1.852069   -0.653984   -0.423014
   43          1             0        7.572453    1.095871    0.639726
   44          1             0        7.559867    0.855653   -1.118452
   45          1             0        7.990424   -1.696842    1.615283
   46          1             0       10.017069   -3.108862    1.849959
   47          1             0       11.949166   -2.777775    0.321035
   48          1             0       11.837176   -1.033681   -1.448243
   49          1             0        9.806842    0.362980   -1.685587
   50          1             0       -7.547613    1.089830   -0.553806
   51          1             0       -7.490748    0.768730    1.190307
   52          1             0       -9.712949    0.183285    1.771441
   53          1             0      -11.702594   -1.266386    1.507146
   54          1             0      -11.792351   -2.934282   -0.335436
   55          1             0       -9.879064   -3.135981   -1.909951
   56          1             0       -7.893375   -1.671812   -1.646706
 ---------------------------------------------------------------------
 Rotational constants (GHZ):      0.4651307      0.0244621      0.0235008
 Standard basis: 6-31G(d,p) (6D, 7F)
 There are   600 symmetry adapted basis functions of A   symmetry.
 Integral buffers will be    262144 words long.
 Raffenetti 2 integral format.
 Two-electron integral symmetry is turned on.
   600 basis functions,  1064 primitive gaussians,   600 cartesian basis functions
   111 alpha electrons      111 beta electrons
       nuclear repulsion energy      2501.4718406436 Hartrees.
 NAtoms=   56 NActive=   56 NUniq=   56 SFac= 1.00D+00 NAtFMM=   60 Big=F
 One-electron integrals computed using PRISM.
 NBasis=   600 RedAO= T  NBF=   600
 NBsUse=   600 1.00D-06 NBFU=   600
 Initial guess read from the read-write file:
 Initial guess orbital symmetries:
       Occupied  (A) (A) (A) (A) (A) (A) (A) (A) (A) (A) (A) (A)
                 (A) (A) (A) (A) (A) (A) (A) (A) (A) (A) (A) (A)
                 (A) (A) (A) (A) (A) (A) (A) (A) (A) (A) (A) (A)
                 (A) (A) (A) (A) (A) (A) (A) (A) (A) (A) (A) (A)
                 (A) (A) (A) (A) (A) (A) (A) (A) (A) (A) (A) (A)
                 (A) (A) (A) (A) (A) (A) (A) (A) (A) (A) (A) (A)
                 (A) (A) (A) (A) (A) (A) (A) (A) (A) (A) (A) (A)
                 (A) (A) (A) (A) (A) (A) (A) (A) (A) (A) (A) (A)
                 (A) (A) (A) (A) (A) (A) (A) (A) (A) (A) (A) (A)
                 (A) (A) (A)
       Virtual   (A) (A) (A) (A) (A) (A) (A) (A) (A) (A) (A) (A)
                 (A) (A) (A) (A) (A) (A) (A) (A) (A) (A) (A) (A)
                 (A) (A) (A) (A) (A) (A) (A) (A) (A) (A) (A) (A)
                 (A) (A) (A) (A) (A) (A) (A) (A) (A) (A) (A) (A)
                 (A) (A) (A) (A) (A) (A) (A) (A) (A) (A) (A) (A)
                 (A) (A) (A) (A) (A) (A) (A) (A) (A) (A) (A) (A)
                 (A) (A) (A) (A) (A) (A) (A) (A) (A) (A) (A) (A)
                 (A) (A) (A) (A) (A) (A) (A) (A) (A) (A) (A) (A)
                 (A) (A) (A) (A) (A) (A) (A) (A) (A) (A) (A) (A)
                 (A) (A) (A) (A) (A) (A) (A) (A) (A) (A) (A) (A)
                 (A) (A) (A) (A) (A) (A) (A) (A) (A) (A) (A) (A)
                 (A) (A) (A) (A) (A) (A) (A) (A) (A) (A) (A) (A)
                 (A) (A) (A) (A) (A) (A) (A) (A) (A) (A) (A) (A)
                 (A) (A) (A) (A) (A) (A) (A) (A) (A) (A) (A) (A)
                 (A) (A) (A) (A) (A) (A) (A) (A) (A) (A) (A) (A)
                 (A) (A) (A) (A) (A) (A) (A) (A) (A) (A) (A) (A)
                 (A) (A) (A) (A) (A) (A) (A) (A) (A) (A) (A) (A)
                 (A) (A) (A) (A) (A) (A) (A) (A) (A) (A) (A) (A)
                 (A) (A) (A) (A) (A) (A) (A) (A) (A) (A) (A) (A)
                 (A) (A) (A) (A) (A) (A) (A) (A) (A) (A) (A) (A)
                 (A) (A) (A) (A) (A) (A) (A) (A) (A) (A) (A) (A)
                 (A) (A) (A) (A) (A) (A) (A) (A) (A) (A) (A) (A)
                 (A) (A) (A) (A) (A) (A) (A) (A) (A) (A) (A) (A)
                 (A) (A) (A) (A) (A) (A) (A) (A) (A) (A) (A) (A)
                 (A) (A) (A) (A) (A) (A) (A) (A) (A) (A) (A) (A)
                 (A) (A) (A) (A) (A) (A) (A) (A) (A) (A) (A) (A)
                 (A) (A) (A) (A) (A) (A) (A) (A) (A) (A) (A) (A)
                 (A) (A) (A) (A) (A) (A) (A) (A) (A) (A) (A) (A)
                 (A) (A) (A) (A) (A) (A) (A) (A) (A) (A) (A) (A)
                 (A) (A) (A) (A) (A) (A) (A) (A) (A) (A) (A) (A)
                 (A) (A) (A) (A) (A) (A) (A) (A) (A) (A) (A) (A)
                 (A) (A) (A) (A) (A) (A) (A) (A) (A) (A) (A) (A)
                 (A) (A) (A) (A) (A) (A) (A) (A) (A) (A) (A) (A)
                 (A) (A) (A) (A) (A) (A) (A) (A) (A) (A) (A) (A)
                 (A) (A) (A) (A) (A) (A) (A) (A) (A) (A) (A) (A)
                 (A) (A) (A) (A) (A) (A) (A) (A) (A) (A) (A) (A)
                 (A) (A) (A) (A) (A) (A) (A) (A) (A) (A) (A) (A)
                 (A) (A) (A) (A) (A) (A) (A) (A) (A) (A) (A) (A)
                 (A) (A) (A) (A) (A) (A) (A) (A) (A) (A) (A) (A)
                 (A) (A) (A) (A) (A) (A) (A) (A) (A) (A) (A) (A)
                 (A) (A) (A) (A) (A) (A) (A) (A) (A)
 Harris functional with IExCor=  402 diagonalized for initial guess.
 ExpMin= 1.61D-01 ExpMax= 5.48D+03 ExpMxC= 8.25D+02 IAcc=1 IRadAn=         1 AccDes= 1.00D-06
 HarFok:  IExCor= 402 AccDes= 1.00D-06 IRadAn=         1 IDoV=1
 ScaDFX=  1.000000  1.000000  1.000000  1.000000
 Requested convergence on RMS density matrix=1.00D-08 within 128 cycles.
 Requested convergence on MAX density matrix=1.00D-06.
 Requested convergence on             energy=1.00D-06.
 No special actions if energy rises.
 Integral accuracy reduced to 1.0D-05 until final iterations.
 Initial convergence to 1.0D-05 achieved.  Increase integral accuracy.
 SCF Done:  E(RB+HF-LYP) =  -1345.22829503     A.U. after   15 cycles
             Convg  =    0.9413D-08             -V/T =  2.0096
             S**2   =   0.0000
 ***** Axes restored to original set *****
 -------------------------------------------------------------------
 Center     Atomic                   Forces (Hartrees/Bohr)
 Number     Number              X              Y              Z
 -------------------------------------------------------------------
    1          6          -0.000014800   -0.000021290   -0.000029992
    2          6          -0.000016284    0.000015579    0.000060914
    3          6          -0.000095206    0.000031070   -0.000332344
    4          6           0.000122306    0.000002934    0.000022777
    5          6           0.000217669    0.000028589    0.000375367
    6          6          -0.000394153   -0.000031501   -0.000209280
    7          8          -0.000414540   -0.000097101   -0.000506513
    8          6           0.000291803    0.000073596    0.000455238
    9          6           0.000097694    0.000528806   -0.000901724
   10          6          -0.001066638   -0.001429763    0.000840579
   11          6           0.000346962    0.000069005    0.000281207
   12          6          -0.000121081    0.000132792   -0.000580984
   13          6          -0.000098959   -0.000010570   -0.000081717
   14          6           0.000406087   -0.000010932    0.000368272
   15          6          -0.000092126   -0.000075455   -0.000019928
   16          6           0.000169713    0.000191066    0.000043793
   17          8          -0.000126311    0.000027931    0.000523641
   18          6           0.001082842    0.000137936    0.000687584
   19          6          -0.000064319    0.000103209   -0.000183471
   20          6          -0.000064353    0.000035340   -0.000051667
   21          6          -0.000003993    0.000011218    0.000090426
   22          6          -0.000106025    0.000079329    0.000091341
   23          6           0.000088775   -0.000169400   -0.000035922
   24          6           0.000161714    0.000008753    0.000201228
   25          8           0.000749178    0.000674613   -0.000361309
   26          6           0.000206136    0.000153810   -0.001187531
   27          6           0.000093985   -0.000116649    0.000136016
   28          6          -0.000029327    0.000028137   -0.000255811
   29          6           0.000030666    0.000183502   -0.000023802
   30          6          -0.000085410   -0.000094195   -0.000011950
   31          6          -0.000081054   -0.000026901   -0.000057809
   32          6          -0.000013173   -0.000059660    0.000093590
   33          1           0.000148648   -0.000023294    0.000036792
   34          1           0.000217895    0.000003599   -0.000157378
   35          1          -0.000214115   -0.000012658   -0.000125413
   36          1          -0.000219216   -0.000018447    0.000033401
   37          1          -0.000326968   -0.000074743   -0.000068845
   38          1           0.000142068   -0.000173138    0.000137695
   39          1          -0.000254224   -0.000081875    0.000228209
   40          1           0.000004618   -0.000066046    0.000267273
   41          1           0.000224031    0.000109805   -0.000071293
   42          1          -0.000061137    0.000145106   -0.000087426
   43          1          -0.000245060   -0.000327455    0.000071187
   44          1          -0.000340662    0.000229152    0.000041508
   45          1           0.000134718   -0.000121269    0.000166597
   46          1           0.000154475   -0.000118154   -0.000080650
   47          1           0.000068689   -0.000007382   -0.000197245
   48          1          -0.000130563    0.000124072   -0.000108732
   49          1          -0.000175131    0.000116553    0.000064848
   50          1          -0.000311861    0.000197781    0.000170401
   51          1          -0.000154977   -0.000346472    0.000166302
   52          1          -0.000101028   -0.000186751    0.000066563
   53          1           0.000040350   -0.000146158    0.000143451
   54          1           0.000176297    0.000064670    0.000088277
   55          1           0.000104731    0.000181338   -0.000035006
   56          1          -0.000059358    0.000157969   -0.000190736
 -------------------------------------------------------------------
 Cartesian Forces:  Max     0.001429763 RMS     0.000289160

 GradGradGradGradGradGradGradGradGradGradGradGradGradGradGradGradGradGrad
 Berny optimization.
 Internal  Forces:  Max     0.000932402 RMS     0.000157957
 Search for a local minimum.
 Step number   5 out of a maximum of 298
 All quantities printed in internal units (Hartrees-Bohrs-Radians)
 Update second derivatives using D2CorX and points  1  2  4  3  5

     Eigenvalues ---    0.00625   0.00652   0.00704   0.00911   0.01170
     Eigenvalues ---    0.01599   0.01602   0.01603   0.01607   0.01761
     Eigenvalues ---    0.01853   0.02009   0.02096   0.02150   0.02189
     Eigenvalues ---    0.02219   0.02227   0.02240   0.02241   0.02251
     Eigenvalues ---    0.02255   0.02257   0.02262   0.02262   0.02263
     Eigenvalues ---    0.02265   0.02267   0.02267   0.02267   0.02273
     Eigenvalues ---    0.02273   0.02274   0.02278   0.02280   0.02282
     Eigenvalues ---    0.02287   0.02287   0.02289   0.02292   0.02294
     Eigenvalues ---    0.02295   0.02302   0.02302   0.02324   0.02351
     Eigenvalues ---    0.02422   0.02428   0.03015   0.04658   0.06444
     Eigenvalues ---    0.06448   0.07343   0.07368   0.11275   0.11470
     Eigenvalues ---    0.13921   0.13926   0.15188   0.15997   0.15998
     Eigenvalues ---    0.15998   0.15999   0.15999   0.16000   0.16000
     Eigenvalues ---    0.16000   0.16000   0.16000   0.16000   0.16000
     Eigenvalues ---    0.16000   0.16000   0.16000   0.16000   0.16002
     Eigenvalues ---    0.16012   0.16037   0.21795   0.22000   0.22000
     Eigenvalues ---    0.22000   0.22000   0.22001   0.22004   0.22007
     Eigenvalues ---    0.22017   0.22180   0.22920   0.22965   0.23459
     Eigenvalues ---    0.23472   0.23883   0.24012   0.24597   0.24980
     Eigenvalues ---    0.24982   0.24997   0.24998   0.25000   0.25000
     Eigenvalues ---    0.25002   0.25101   0.26242   0.30519   0.31490
     Eigenvalues ---    0.31938   0.33103   0.35103   0.35133   0.35320
     Eigenvalues ---    0.35355   0.35488   0.36388   0.36390   0.36391
     Eigenvalues ---    0.36462   0.36504   0.36507   0.36516   0.36518
     Eigenvalues ---    0.36520   0.36530   0.36626   0.36631   0.36678
     Eigenvalues ---    0.36699   0.36722   0.36781   0.36794   0.36921
     Eigenvalues ---    0.36930   0.37034   0.41100   0.42697   0.43038
     Eigenvalues ---    0.43158   0.43399   0.43399   0.43452   0.43487
     Eigenvalues ---    0.43494   0.44542   0.46482   0.46892   0.47216
     Eigenvalues ---    0.47278   0.47516   0.47607   0.47784   0.47894
     Eigenvalues ---    0.47914   0.48137   0.48172   0.48195   0.48533
     Eigenvalues ---    0.49022   0.49754   0.51976   0.55227   0.56240
     Eigenvalues ---    0.59642   0.968521000.000001000.000001000.00000
     Eigenvalues --- 1000.000001000.000001000.000001000.000001000.00000
     Eigenvalues --- 1000.000001000.000001000.000001000.000001000.00000
     Eigenvalues --- 1000.000001000.000001000.000001000.000001000.00000
     Eigenvalues --- 1000.000001000.000001000.000001000.000001000.00000
     Eigenvalues --- 1000.000001000.000001000.000001000.000001000.00000
     Eigenvalues --- 1000.000001000.000001000.000001000.000001000.00000
     Eigenvalues --- 1000.000001000.000001000.000001000.000001000.00000
     Eigenvalues --- 1000.000001000.000001000.000001000.000001000.00000
     Eigenvalues --- 1000.000001000.000001000.000001000.000001000.00000
     Eigenvalues --- 1000.000001000.000001000.000001000.000001000.00000
     Eigenvalues --- 1000.000001000.000001000.000001000.000001000.00000
     Eigenvalues --- 1000.000001000.000001000.000001000.000001000.00000
     Eigenvalues --- 1000.000001000.000001000.000001000.000001000.00000
     Eigenvalues --- 1000.000001000.000001000.000001000.000001000.00000
     Eigenvalues --- 1000.000001000.000001000.000001000.000001000.00000
     Eigenvalues --- 1000.000001000.000001000.000001000.000001000.00000
     Eigenvalues --- 1000.000001000.000001000.000001000.000001000.00000
     Eigenvalues --- 1000.000001000.000001000.000001000.000001000.00000
     Eigenvalues --- 1000.000001000.000001000.000001000.000001000.00000
     Eigenvalues --- 1000.000001000.000001000.000001000.000001000.00000
     Eigenvalues --- 1000.000001000.000001000.000001000.000001000.00000
     Eigenvalues --- 1000.000001000.000001000.000001000.000001000.00000
     Eigenvalues --- 1000.000001000.000001000.000001000.000001000.00000
     Eigenvalues --- 1000.000001000.000001000.000001000.000001000.00000
     Eigenvalues --- 1000.000001000.000001000.00000
 RFO step:  Lambda=-7.07831028D-05.
 Quartic linear search produced a step of -0.00545.
 Iteration  1 RMS(Cart)=  0.03100616 RMS(Int)=  0.00025405
 Iteration  2 RMS(Cart)=  0.00044039 RMS(Int)=  0.00000187
 Iteration  3 RMS(Cart)=  0.00000013 RMS(Int)=  0.00000187
 Variable       Old X    -DE/DX   Delta X   Delta X   Delta X     New X
                                 (Linear)    (Quad)   (Total)
    R1        2.61275  -0.00008   0.00000  -0.00034  -0.00034   2.61241
    R2        2.67050  -0.00024   0.00000  -0.00075  -0.00075   2.66975
    R3        2.05154  -0.00015   0.00000  -0.00051  -0.00051   2.05102
    R4        2.65894  -0.00007   0.00000  -0.00075  -0.00075   2.65819
    R5        2.05090  -0.00027   0.00000  -0.00088  -0.00088   2.05002
    R6        2.64582  -0.00018   0.00000  -0.00036  -0.00037   2.64546
    R7        2.57169   0.00024  -0.00001   0.00137   0.00136   2.57306
    R8        2.63480  -0.00020   0.00001  -0.00125  -0.00124   2.63356
    R9        2.04730  -0.00025   0.00000  -0.00091  -0.00091   2.04639
   R10        2.65293   0.00016  -0.00001   0.00089   0.00088   2.65381
   R11        2.05405  -0.00021   0.00000  -0.00070  -0.00070   2.05335
   R12        2.75423  -0.00007   0.00001  -0.00159  -0.00158   2.75265
   R13        2.69931   0.00089  -0.00002   0.00391   0.00389   2.70321
   R14        2.54962   0.00010   0.00000   0.00063   0.00063   2.55025
   R15        2.05906  -0.00028   0.00000  -0.00087  -0.00087   2.05819
   R16        2.80362  -0.00048   0.00002  -0.00371  -0.00369   2.79993
   R17        2.04927  -0.00008   0.00000  -0.00028  -0.00028   2.04898
   R18        2.82922  -0.00020   0.00001  -0.00196  -0.00194   2.82727
   R19        2.32713   0.00093  -0.00001   0.00253   0.00251   2.32964
   R20        2.64825   0.00022   0.00000   0.00073   0.00073   2.64898
   R21        2.65949  -0.00026   0.00000  -0.00088  -0.00088   2.65861
   R22        2.62926  -0.00012   0.00000  -0.00080  -0.00080   2.62847
   R23        2.05062  -0.00032   0.00000  -0.00111  -0.00111   2.04951
   R24        2.65179  -0.00021   0.00000  -0.00063  -0.00063   2.65116
   R25        2.04773  -0.00027   0.00000  -0.00096  -0.00096   2.04677
   R26        2.65262  -0.00011   0.00000  -0.00073  -0.00073   2.65190
   R27        2.57168   0.00047  -0.00001   0.00198   0.00197   2.57365
   R28        2.62096  -0.00003   0.00000  -0.00030  -0.00030   2.62066
   R29        2.05075  -0.00026   0.00000  -0.00084  -0.00084   2.04990
   R30        2.04988  -0.00011   0.00000  -0.00035  -0.00035   2.04952
   R31        2.69933   0.00085  -0.00001   0.00372   0.00371   2.70303
   R32        2.85175  -0.00006   0.00001  -0.00093  -0.00093   2.85082
   R33        2.08074  -0.00041   0.00000  -0.00136  -0.00136   2.07937
   R34        2.07629  -0.00039   0.00000  -0.00132  -0.00132   2.07497
   R35        2.64694  -0.00013   0.00000  -0.00054  -0.00054   2.64641
   R36        2.64170   0.00006   0.00000   0.00017   0.00017   2.64187
   R37        2.63373  -0.00008   0.00000  -0.00035  -0.00035   2.63339
   R38        2.05162  -0.00025   0.00000  -0.00085  -0.00085   2.05078
   R39        2.64049  -0.00017   0.00000  -0.00078  -0.00077   2.63971
   R40        2.05312  -0.00021   0.00000  -0.00071  -0.00071   2.05242
   R41        2.63540  -0.00008   0.00000  -0.00033  -0.00033   2.63507
   R42        2.05287  -0.00021   0.00000  -0.00069  -0.00069   2.05218
   R43        2.63863  -0.00017   0.00000  -0.00079  -0.00079   2.63784
   R44        2.05289  -0.00021   0.00000  -0.00068  -0.00068   2.05221
   R45        2.05518  -0.00022   0.00000  -0.00072  -0.00072   2.05446
   R46        2.85205  -0.00004   0.00001  -0.00081  -0.00080   2.85125
   R47        2.08042  -0.00041   0.00000  -0.00135  -0.00135   2.07907
   R48        2.07609  -0.00039   0.00000  -0.00132  -0.00132   2.07477
   R49        2.64173   0.00005   0.00000   0.00011   0.00011   2.64185
   R50        2.64694  -0.00014   0.00000  -0.00056  -0.00056   2.64638
   R51        2.63868  -0.00018   0.00000  -0.00082  -0.00081   2.63787
   R52        2.05518  -0.00022   0.00000  -0.00074  -0.00074   2.05444
   R53        2.63546  -0.00010   0.00000  -0.00038  -0.00038   2.63508
   R54        2.05293  -0.00020   0.00000  -0.00068  -0.00068   2.05226
   R55        2.64041  -0.00015   0.00000  -0.00071  -0.00071   2.63970
   R56        2.05291  -0.00021   0.00000  -0.00068  -0.00068   2.05223
   R57        2.63374  -0.00007   0.00000  -0.00029  -0.00029   2.63345
   R58        2.05317  -0.00021   0.00000  -0.00071  -0.00071   2.05247
   R59        2.05157  -0.00025   0.00000  -0.00087  -0.00087   2.05070
    A1        2.11746  -0.00004   0.00000  -0.00004  -0.00005   2.11741
    A2        2.07365   0.00006   0.00000   0.00050   0.00050   2.07415
    A3        2.09207  -0.00002   0.00000  -0.00045  -0.00045   2.09162
    A4        2.09977   0.00011   0.00000   0.00052   0.00052   2.10029
    A5        2.11826  -0.00008   0.00000  -0.00036  -0.00036   2.11790
    A6        2.06515  -0.00003   0.00000  -0.00016  -0.00016   2.06500
    A7        2.08630  -0.00003   0.00000  -0.00007  -0.00007   2.08623
    A8        2.01616  -0.00001   0.00001  -0.00068  -0.00068   2.01549
    A9        2.18071   0.00004   0.00000   0.00075   0.00075   2.18146
   A10        2.08358  -0.00006   0.00000  -0.00045  -0.00045   2.08313
   A11        2.11525   0.00004   0.00000   0.00012   0.00012   2.11536
   A12        2.08436   0.00002   0.00000   0.00033   0.00033   2.08469
   A13        2.13099   0.00012   0.00000   0.00088   0.00087   2.13187
   A14        2.07561   0.00002   0.00000   0.00066   0.00066   2.07627
   A15        2.07658  -0.00014   0.00001  -0.00154  -0.00153   2.07505
   A16        2.04827  -0.00010   0.00000  -0.00083  -0.00083   2.04744
   A17        2.15830   0.00008   0.00000   0.00085   0.00085   2.15915
   A18        2.07662   0.00002   0.00000  -0.00002  -0.00002   2.07660
   A19        2.06964   0.00049   0.00001   0.00153   0.00154   2.07118
   A20        2.23964   0.00000   0.00000   0.00050   0.00049   2.24013
   A21        2.02438   0.00020  -0.00001   0.00247   0.00247   2.02685
   A22        2.01917  -0.00020   0.00001  -0.00297  -0.00296   2.01621
   A23        2.09299   0.00030   0.00000   0.00157   0.00157   2.09456
   A24        2.11616  -0.00032   0.00000  -0.00242  -0.00242   2.11375
   A25        2.07376   0.00003  -0.00001   0.00096   0.00095   2.07472
   A26        2.07717  -0.00001  -0.00001   0.00101   0.00098   2.07815
   A27        2.11337   0.00005   0.00000  -0.00022  -0.00023   2.11314
   A28        2.09264  -0.00004   0.00001  -0.00082  -0.00082   2.09182
   A29        2.05420   0.00034   0.00000   0.00146   0.00146   2.05566
   A30        2.16869  -0.00016   0.00000  -0.00045  -0.00046   2.16823
   A31        2.06002  -0.00018   0.00000  -0.00086  -0.00087   2.05915
   A32        2.12412   0.00011   0.00000   0.00073   0.00073   2.12485
   A33        2.05749  -0.00020   0.00001  -0.00225  -0.00225   2.05524
   A34        2.10158   0.00010  -0.00001   0.00153   0.00152   2.10309
   A35        2.08443  -0.00001   0.00000  -0.00024  -0.00024   2.08420
   A36        2.08577  -0.00005   0.00000  -0.00021  -0.00021   2.08557
   A37        2.11298   0.00006   0.00000   0.00045   0.00045   2.11342
   A38        2.08828  -0.00007   0.00000  -0.00021  -0.00021   2.08807
   A39        2.17716   0.00010  -0.00001   0.00109   0.00109   2.17825
   A40        2.01774  -0.00003   0.00001  -0.00089  -0.00088   2.01686
   A41        2.09703   0.00011   0.00000   0.00051   0.00051   2.09753
   A42        2.06761  -0.00006   0.00000  -0.00037  -0.00037   2.06724
   A43        2.11854  -0.00004   0.00000  -0.00013  -0.00013   2.11841
   A44        2.11239   0.00004   0.00000   0.00012   0.00013   2.11251
   A45        2.10471   0.00002   0.00000   0.00027   0.00027   2.10498
   A46        2.06578  -0.00006   0.00000  -0.00033  -0.00033   2.06545
   A47        2.07133   0.00043   0.00001   0.00094   0.00096   2.07229
   A48        1.90083   0.00022   0.00000   0.00072   0.00073   1.90156
   A49        1.90497  -0.00010   0.00001  -0.00128  -0.00127   1.90370
   A50        1.92452  -0.00014   0.00001  -0.00193  -0.00192   1.92260
   A51        1.92900  -0.00004  -0.00001   0.00084   0.00083   1.92983
   A52        1.92739  -0.00002  -0.00001   0.00085   0.00084   1.92823
   A53        1.87706   0.00006   0.00000   0.00075   0.00074   1.87780
   A54        2.10544   0.00009   0.00000   0.00055   0.00055   2.10599
   A55        2.09751   0.00001   0.00000  -0.00009  -0.00009   2.09742
   A56        2.07962  -0.00010   0.00000  -0.00048  -0.00048   2.07914
   A57        2.10026   0.00002   0.00000   0.00011   0.00011   2.10037
   A58        2.08272  -0.00001   0.00000  -0.00023  -0.00023   2.08249
   A59        2.10010  -0.00001   0.00000   0.00012   0.00012   2.10023
   A60        2.09829   0.00005   0.00000   0.00021   0.00021   2.09850
   A61        2.09015  -0.00004   0.00000  -0.00023  -0.00023   2.08992
   A62        2.09475  -0.00001   0.00000   0.00002   0.00002   2.09477
   A63        2.08945  -0.00001   0.00000  -0.00009  -0.00009   2.08936
   A64        2.09651   0.00003   0.00000   0.00025   0.00025   2.09676
   A65        2.09721  -0.00001   0.00000  -0.00015  -0.00015   2.09706
   A66        2.09463  -0.00001   0.00000  -0.00007  -0.00007   2.09456
   A67        2.09794  -0.00003   0.00000  -0.00030  -0.00030   2.09764
   A68        2.09055   0.00004   0.00000   0.00038   0.00038   2.09094
   A69        2.10404   0.00006   0.00000   0.00034   0.00034   2.10438
   A70        2.08888  -0.00003   0.00000  -0.00037  -0.00037   2.08851
   A71        2.09026  -0.00003   0.00000   0.00003   0.00003   2.09028
   A72        1.89995   0.00031   0.00000   0.00135   0.00135   1.90130
   A73        1.90572  -0.00012   0.00001  -0.00138  -0.00138   1.90434
   A74        1.92543  -0.00015   0.00001  -0.00185  -0.00185   1.92358
   A75        1.92852  -0.00005  -0.00001   0.00075   0.00075   1.92927
   A76        1.92714  -0.00006  -0.00001   0.00049   0.00049   1.92763
   A77        1.87705   0.00007   0.00000   0.00058   0.00058   1.87763
   A78        2.09781  -0.00006   0.00000  -0.00048  -0.00048   2.09733
   A79        2.10532   0.00014   0.00000   0.00082   0.00082   2.10614
   A80        2.07944  -0.00008   0.00000  -0.00037  -0.00037   2.07906
   A81        2.10412   0.00006   0.00000   0.00036   0.00036   2.10447
   A82        2.08863  -0.00004   0.00000  -0.00052  -0.00052   2.08812
   A83        2.09043  -0.00002   0.00000   0.00016   0.00016   2.09059
   A84        2.09469  -0.00002   0.00000  -0.00016  -0.00016   2.09453
   A85        2.09051   0.00005   0.00000   0.00047   0.00047   2.09098
   A86        2.09793  -0.00003   0.00000  -0.00031  -0.00031   2.09762
   A87        2.08933   0.00000   0.00000   0.00000   0.00000   2.08932
   A88        2.09723  -0.00002   0.00000  -0.00019  -0.00019   2.09704
   A89        2.09662   0.00002   0.00000   0.00020   0.00020   2.09681
   A90        2.09834   0.00004   0.00000   0.00019   0.00019   2.09852
   A91        2.09471  -0.00001   0.00000   0.00001   0.00001   2.09471
   A92        2.09014  -0.00003   0.00000  -0.00019  -0.00019   2.08995
   A93        2.10040   0.00000   0.00000   0.00000   0.00000   2.10040
   A94        2.08261  -0.00003   0.00000  -0.00045  -0.00045   2.08216
   A95        2.10008   0.00003   0.00000   0.00045   0.00045   2.10052
    D1        0.00007  -0.00001   0.00000  -0.00055  -0.00055  -0.00048
    D2        3.14078   0.00000   0.00000  -0.00015  -0.00015   3.14063
    D3       -3.13792  -0.00001   0.00000  -0.00077  -0.00077  -3.13869
    D4        0.00279   0.00000   0.00000  -0.00037  -0.00037   0.00242
    D5       -0.00124   0.00002   0.00000   0.00106   0.00106  -0.00018
    D6        3.14132   0.00002   0.00000   0.00113   0.00113  -3.14074
    D7        3.13672   0.00002   0.00000   0.00128   0.00128   3.13799
    D8       -0.00392   0.00002   0.00000   0.00135   0.00135  -0.00257
    D9       -0.00017  -0.00001   0.00000  -0.00037  -0.00037  -0.00053
   D10       -3.13856  -0.00001   0.00000  -0.00026  -0.00026  -3.13882
   D11       -3.14090  -0.00001   0.00000  -0.00076  -0.00075   3.14153
   D12        0.00389  -0.00001   0.00000  -0.00065  -0.00065   0.00324
   D13        0.00146   0.00001   0.00000   0.00074   0.00073   0.00219
   D14       -3.13824   0.00000   0.00000   0.00035   0.00035  -3.13789
   D15        3.13953   0.00001   0.00000   0.00062   0.00062   3.14014
   D16       -0.00017   0.00001   0.00000   0.00023   0.00023   0.00006
   D17       -3.11179  -0.00002   0.00000  -0.00068  -0.00068  -3.11248
   D18        0.03320  -0.00002   0.00000  -0.00057  -0.00057   0.03263
   D19       -0.00273   0.00000   0.00000  -0.00020  -0.00020  -0.00294
   D20        3.14061  -0.00001   0.00000  -0.00044  -0.00044   3.14017
   D21        3.13700   0.00001   0.00000   0.00018   0.00018   3.13717
   D22       -0.00284   0.00000   0.00000  -0.00006  -0.00006  -0.00290
   D23        0.00259  -0.00001   0.00000  -0.00068  -0.00068   0.00191
   D24       -3.13992  -0.00002   0.00000  -0.00074  -0.00074  -3.14066
   D25       -3.14076  -0.00001   0.00000  -0.00044  -0.00044  -3.14120
   D26       -0.00008  -0.00001   0.00000  -0.00050  -0.00050  -0.00059
   D27       -0.03621   0.00003  -0.00002   0.00528   0.00526  -0.03095
   D28        3.10604   0.00004  -0.00002   0.00547   0.00545   3.11149
   D29        3.10636   0.00004  -0.00002   0.00535   0.00533   3.11169
   D30       -0.03458   0.00004  -0.00002   0.00553   0.00552  -0.02906
   D31        3.09732  -0.00004   0.00000  -0.00336  -0.00335   3.09397
   D32        0.98990  -0.00008   0.00001  -0.00405  -0.00404   0.98586
   D33       -1.06840  -0.00001   0.00000  -0.00305  -0.00305  -1.07145
   D34        3.12677   0.00005   0.00000   0.00278   0.00278   3.12956
   D35        0.01041  -0.00003   0.00000  -0.00268  -0.00267   0.00774
   D36       -0.01547   0.00005   0.00000   0.00260   0.00260  -0.01288
   D37       -3.13184  -0.00004   0.00000  -0.00286  -0.00286  -3.13470
   D38        3.05313   0.00027   0.00003   0.01974   0.01977   3.07289
   D39       -0.09117  -0.00018  -0.00013   0.00960   0.00946  -0.08171
   D40       -0.11308   0.00035   0.00002   0.02502   0.02505  -0.08803
   D41        3.02581  -0.00010  -0.00014   0.01488   0.01474   3.04055
   D42        2.94250  -0.00010  -0.00014   0.02035   0.02021   2.96271
   D43       -0.22482  -0.00001  -0.00014   0.02754   0.02740  -0.19742
   D44       -0.19642   0.00034   0.00002   0.03037   0.03038  -0.16604
   D45        2.91944   0.00044   0.00001   0.03756   0.03758   2.95702
   D46        3.13206   0.00001   0.00000   0.00176   0.00176   3.13381
   D47       -0.00919   0.00003   0.00000   0.00280   0.00280  -0.00639
   D48        0.01456  -0.00008   0.00000  -0.00499  -0.00498   0.00957
   D49       -3.12669  -0.00006   0.00000  -0.00394  -0.00394  -3.13063
   D50       -3.12095  -0.00004   0.00001  -0.00354  -0.00353  -3.12448
   D51       -0.00671   0.00002   0.00000  -0.00035  -0.00035  -0.00705
   D52       -0.00517   0.00007   0.00000   0.00371   0.00371  -0.00145
   D53        3.10907   0.00012   0.00000   0.00690   0.00689   3.11597
   D54       -0.01295   0.00004   0.00000   0.00283   0.00282  -0.01012
   D55        3.12830   0.00003   0.00000   0.00176   0.00176   3.13006
   D56        3.12829   0.00002   0.00000   0.00176   0.00175   3.13005
   D57       -0.01365   0.00001   0.00000   0.00069   0.00069  -0.01296
   D58        0.00176   0.00001   0.00000   0.00070   0.00070   0.00246
   D59       -3.14028  -0.00003   0.00000  -0.00155  -0.00155   3.14136
   D60       -3.13947   0.00002   0.00000   0.00178   0.00178  -3.13770
   D61        0.00167  -0.00001   0.00000  -0.00046  -0.00047   0.00120
   D62        0.00736  -0.00003   0.00000  -0.00192  -0.00192   0.00544
   D63       -3.13020  -0.00005   0.00000  -0.00301  -0.00301  -3.13321
   D64       -3.13382   0.00001   0.00000   0.00012   0.00012  -3.13370
   D65        0.01181  -0.00002   0.00000  -0.00097  -0.00097   0.01084
   D66        0.03712   0.00007  -0.00001   0.00442   0.00441   0.04154
   D67       -3.10490   0.00003  -0.00001   0.00226   0.00225  -3.10265
   D68       -0.00561  -0.00001   0.00000  -0.00033  -0.00033  -0.00594
   D69       -3.12044  -0.00007   0.00000  -0.00345  -0.00345  -3.12389
   D70        3.13183   0.00001   0.00000   0.00079   0.00079   3.13262
   D71        0.01699  -0.00004   0.00000  -0.00233  -0.00233   0.01466
   D72        3.09104  -0.00001   0.00000  -0.00139  -0.00138   3.08966
   D73        0.98429  -0.00006   0.00001  -0.00229  -0.00228   0.98201
   D74       -1.07499   0.00002   0.00000  -0.00107  -0.00107  -1.07606
   D75       -0.77540  -0.00001  -0.00001   0.00275   0.00274  -0.77267
   D76        2.40417   0.00000  -0.00001   0.00336   0.00335   2.40752
   D77        1.31720  -0.00001  -0.00001   0.00214   0.00214   1.31933
   D78       -1.78641   0.00000  -0.00001   0.00275   0.00275  -1.78367
   D79       -2.89112   0.00004  -0.00002   0.00414   0.00412  -2.88700
   D80        0.28846   0.00005  -0.00002   0.00475   0.00473   0.29319
   D81       -3.10376   0.00000   0.00000   0.00027   0.00027  -3.10350
   D82        0.05306   0.00000   0.00000   0.00030   0.00030   0.05335
   D83        0.00023  -0.00001   0.00000  -0.00033  -0.00033  -0.00009
   D84       -3.12613  -0.00001   0.00000  -0.00030  -0.00030  -3.12643
   D85        3.09444   0.00002   0.00000   0.00070   0.00070   3.09514
   D86       -0.04914  -0.00001   0.00000  -0.00092  -0.00091  -0.05005
   D87       -0.00973   0.00002   0.00000   0.00127   0.00128  -0.00845
   D88        3.12987   0.00000   0.00000  -0.00034  -0.00034   3.12954
   D89        0.00808  -0.00001   0.00000  -0.00030  -0.00030   0.00777
   D90       -3.13554   0.00000   0.00000   0.00005   0.00005  -3.13549
   D91        3.13429   0.00000   0.00000  -0.00033  -0.00033   3.13395
   D92       -0.00933   0.00000   0.00000   0.00002   0.00002  -0.00931
   D93       -0.00690   0.00000   0.00000  -0.00001  -0.00001  -0.00691
   D94        3.13942   0.00000   0.00000  -0.00004  -0.00004   3.13938
   D95        3.13672   0.00000   0.00000  -0.00037  -0.00036   3.13636
   D96       -0.00014  -0.00001   0.00000  -0.00039  -0.00039  -0.00054
   D97       -0.00255   0.00002   0.00000   0.00095   0.00095  -0.00160
   D98       -3.13311   0.00000   0.00000   0.00011   0.00011  -3.13300
   D99        3.13431   0.00002   0.00000   0.00098   0.00098   3.13529
   D100       0.00375   0.00000   0.00000   0.00014   0.00014   0.00389
   D101       0.01094  -0.00003   0.00000  -0.00160  -0.00160   0.00934
   D102      -3.12867   0.00000   0.00000   0.00002   0.00002  -3.12865
   D103       3.14154  -0.00001   0.00000  -0.00076  -0.00076   3.14078
   D104       0.00194   0.00002   0.00000   0.00086   0.00086   0.00279
   D105       2.40835   0.00002  -0.00001   0.00638   0.00636   2.41472
   D106      -0.77138   0.00001  -0.00001   0.00542   0.00541  -0.76597
   D107      -1.78216   0.00003  -0.00001   0.00598   0.00597  -1.77619
   D108       1.32130   0.00002  -0.00001   0.00503   0.00502   1.32631
   D109       0.29224   0.00005  -0.00002   0.00749   0.00747   0.29972
   D110      -2.88749   0.00004  -0.00002   0.00654   0.00652  -2.88096
   D111       3.09446   0.00001   0.00000   0.00020   0.00021   3.09467
   D112      -0.04887  -0.00001   0.00000  -0.00099  -0.00098  -0.04985
   D113      -0.00955   0.00002   0.00000   0.00112   0.00112  -0.00843
   D114       3.13030   0.00000   0.00000  -0.00007  -0.00007   3.13023
   D115      -3.10348   0.00000   0.00000   0.00043   0.00043  -3.10305
   D116       0.05336   0.00000   0.00000   0.00034   0.00033   0.05369
   D117       0.00037  -0.00001   0.00000  -0.00051  -0.00051  -0.00014
   D118      -3.12597  -0.00001   0.00000  -0.00061  -0.00061  -3.12658
   D119       0.01070  -0.00002   0.00000  -0.00117  -0.00117   0.00953
   D120       3.14145  -0.00001   0.00000  -0.00065  -0.00065   3.14080
   D121      -3.12915   0.00000   0.00000   0.00002   0.00002  -3.12913
   D122       0.00160   0.00001   0.00000   0.00054   0.00054   0.00214
   D123      -0.00257   0.00001   0.00000   0.00061   0.00061  -0.00196
   D124       3.13445   0.00001   0.00000   0.00073   0.00073   3.13518
   D125      -3.13328   0.00000   0.00000   0.00008   0.00008  -3.13319
   D126       0.00375   0.00000   0.00000   0.00020   0.00020   0.00395
   D127      -0.00657   0.00000   0.00000  -0.00001  -0.00001  -0.00658
   D128       3.13686   0.00000   0.00000  -0.00013  -0.00013   3.13674
   D129       3.13959   0.00000   0.00000  -0.00013  -0.00012   3.13947
   D130      -0.00016   0.00000   0.00000  -0.00024  -0.00024  -0.00040
   D131       0.00768   0.00000   0.00000  -0.00004  -0.00004   0.00764
   D132       3.13387   0.00000   0.00000   0.00005   0.00005   3.13392
   D133      -3.13575   0.00000   0.00000   0.00008   0.00008  -3.13567
   D134      -0.00956   0.00000   0.00000   0.00017   0.00017  -0.00939
         Item               Value     Threshold  Converged?
 Maximum Force            0.000932     0.000450     NO 
 RMS     Force            0.000158     0.000300     YES
 Maximum Displacement     0.130496     0.001800     NO 
 RMS     Displacement     0.031022     0.001200     NO 
 Predicted change in Energy=-3.556503D-05
 GradGradGradGradGradGradGradGradGradGradGradGradGradGradGradGradGradGrad

 Stoichiometry    C29H24O3
 Framework group  C1[X(C29H24O3)]
 Deg. of freedom   162
 Full point group                 C1      NOp   1
 Largest Abelian subgroup         C1      NOp   1
 Largest concise Abelian subgroup C1      NOp   1
                         Standard orientation:                         
 ---------------------------------------------------------------------
 Center     Atomic     Atomic              Coordinates (Angstroms)
 Number     Number      Type              X           Y           Z
 ---------------------------------------------------------------------
    1          6             0        2.775199   -0.150336    0.090719
    2          6             0        4.052624   -0.678809    0.093744
    3          6             0        5.170354    0.163596   -0.046634
    4          6             0        4.980960    1.543174   -0.190367
    5          6             0        3.686237    2.058792   -0.189197
    6          6             0        2.555145    1.237933   -0.051411
    7          8             0        6.380055   -0.461238   -0.033566
    8          6             0        1.233452    1.850176   -0.060648
    9          6             0        0.029963    1.245591    0.024979
   10          6             0       -1.209590    2.057178    0.012607
   11          6             0       -2.534089    1.361429    0.018929
   12          6             0       -3.680441    2.140679    0.227822
   13          6             0       -4.953620    1.580747    0.240596
   14          6             0       -5.102190    0.202067    0.027539
   15          6             0       -3.966556   -0.592521   -0.192198
   16          6             0       -2.703864   -0.019103   -0.192285
   17          8             0       -6.292820   -0.459073    0.017290
   18          6             0        7.564550    0.334327   -0.135112
   19          6             0        8.770184   -0.566515   -0.031312
   20          6             0        8.826180   -1.575986    0.937710
   21          6             0        9.961761   -2.374781    1.057305
   22          6             0       11.058326   -2.168825    0.216834
   23          6             0       11.009462   -1.164746   -0.749520
   24          6             0        9.867571   -0.371799   -0.875274
   25          8             0       -1.163560    3.289110    0.011025
   26          6             0       -7.498123    0.292422    0.186102
   27          6             0       -8.677760   -0.640630    0.066077
   28          6             0       -9.762887   -0.517085    0.938804
   29          6             0      -10.882743   -1.338825    0.800220
   30          6             0      -10.921175   -2.301011   -0.208314
   31          6             0       -9.836562   -2.435844   -1.078189
   32          6             0       -8.723338   -1.608131   -0.945354
   33          1             0        1.930369   -0.822305    0.203468
   34          1             0        4.222157   -1.744643    0.203736
   35          1             0        5.821818    2.216066   -0.303734
   36          1             0        3.546673    3.130683   -0.299855
   37          1             0        1.208164    2.935480   -0.148530
   38          1             0       -0.050315    0.168633    0.121786
   39          1             0       -3.546140    3.206087    0.379902
   40          1             0       -5.813558    2.215444    0.416045
   41          1             0       -4.104405   -1.654902   -0.362646
   42          1             0       -1.848236   -0.658063   -0.381773
   43          1             0        7.567780    1.079426    0.674581
   44          1             0        7.573449    0.879778   -1.088037
   45          1             0        7.970619   -1.739192    1.585080
   46          1             0        9.992511   -3.158611    1.808479
   47          1             0       11.943252   -2.790933    0.312815
   48          1             0       11.854442   -1.003168   -1.412286
   49          1             0        9.829101    0.401926   -1.638044
   50          1             0       -7.545349    1.075543   -0.585214
   51          1             0       -7.500887    0.790199    1.164690
   52          1             0       -9.731942    0.223996    1.733643
   53          1             0      -11.718376   -1.232581    1.485668
   54          1             0      -11.788728   -2.945567   -0.314513
   55          1             0       -9.859275   -3.186661   -1.862672
   56          1             0       -7.876728   -1.715999   -1.615608
 ---------------------------------------------------------------------
 Rotational constants (GHZ):      0.4639735      0.0244713      0.0234926
 Standard basis: 6-31G(d,p) (6D, 7F)
 There are   600 symmetry adapted basis functions of A   symmetry.
 Integral buffers will be    262144 words long.
 Raffenetti 2 integral format.
 Two-electron integral symmetry is turned on.
   600 basis functions,  1064 primitive gaussians,   600 cartesian basis functions
   111 alpha electrons      111 beta electrons
       nuclear repulsion energy      2501.3898017227 Hartrees.
 NAtoms=   56 NActive=   56 NUniq=   56 SFac= 1.00D+00 NAtFMM=   60 Big=F
 One-electron integrals computed using PRISM.
 NBasis=   600 RedAO= T  NBF=   600
 NBsUse=   600 1.00D-06 NBFU=   600
 Initial guess read from the read-write file:
 Initial guess orbital symmetries:
       Occupied  (A) (A) (A) (A) (A) (A) (A) (A) (A) (A) (A) (A)
                 (A) (A) (A) (A) (A) (A) (A) (A) (A) (A) (A) (A)
                 (A) (A) (A) (A) (A) (A) (A) (A) (A) (A) (A) (A)
                 (A) (A) (A) (A) (A) (A) (A) (A) (A) (A) (A) (A)
                 (A) (A) (A) (A) (A) (A) (A) (A) (A) (A) (A) (A)
                 (A) (A) (A) (A) (A) (A) (A) (A) (A) (A) (A) (A)
                 (A) (A) (A) (A) (A) (A) (A) (A) (A) (A) (A) (A)
                 (A) (A) (A) (A) (A) (A) (A) (A) (A) (A) (A) (A)
                 (A) (A) (A) (A) (A) (A) (A) (A) (A) (A) (A) (A)
                 (A) (A) (A)
       Virtual   (A) (A) (A) (A) (A) (A) (A) (A) (A) (A) (A) (A)
                 (A) (A) (A) (A) (A) (A) (A) (A) (A) (A) (A) (A)
                 (A) (A) (A) (A) (A) (A) (A) (A) (A) (A) (A) (A)
                 (A) (A) (A) (A) (A) (A) (A) (A) (A) (A) (A) (A)
                 (A) (A) (A) (A) (A) (A) (A) (A) (A) (A) (A) (A)
                 (A) (A) (A) (A) (A) (A) (A) (A) (A) (A) (A) (A)
                 (A) (A) (A) (A) (A) (A) (A) (A) (A) (A) (A) (A)
                 (A) (A) (A) (A) (A) (A) (A) (A) (A) (A) (A) (A)
                 (A) (A) (A) (A) (A) (A) (A) (A) (A) (A) (A) (A)
                 (A) (A) (A) (A) (A) (A) (A) (A) (A) (A) (A) (A)
                 (A) (A) (A) (A) (A) (A) (A) (A) (A) (A) (A) (A)
                 (A) (A) (A) (A) (A) (A) (A) (A) (A) (A) (A) (A)
                 (A) (A) (A) (A) (A) (A) (A) (A) (A) (A) (A) (A)
                 (A) (A) (A) (A) (A) (A) (A) (A) (A) (A) (A) (A)
                 (A) (A) (A) (A) (A) (A) (A) (A) (A) (A) (A) (A)
                 (A) (A) (A) (A) (A) (A) (A) (A) (A) (A) (A) (A)
                 (A) (A) (A) (A) (A) (A) (A) (A) (A) (A) (A) (A)
                 (A) (A) (A) (A) (A) (A) (A) (A) (A) (A) (A) (A)
                 (A) (A) (A) (A) (A) (A) (A) (A) (A) (A) (A) (A)
                 (A) (A) (A) (A) (A) (A) (A) (A) (A) (A) (A) (A)
                 (A) (A) (A) (A) (A) (A) (A) (A) (A) (A) (A) (A)
                 (A) (A) (A) (A) (A) (A) (A) (A) (A) (A) (A) (A)
                 (A) (A) (A) (A) (A) (A) (A) (A) (A) (A) (A) (A)
                 (A) (A) (A) (A) (A) (A) (A) (A) (A) (A) (A) (A)
                 (A) (A) (A) (A) (A) (A) (A) (A) (A) (A) (A) (A)
                 (A) (A) (A) (A) (A) (A) (A) (A) (A) (A) (A) (A)
                 (A) (A) (A) (A) (A) (A) (A) (A) (A) (A) (A) (A)
                 (A) (A) (A) (A) (A) (A) (A) (A) (A) (A) (A) (A)
                 (A) (A) (A) (A) (A) (A) (A) (A) (A) (A) (A) (A)
                 (A) (A) (A) (A) (A) (A) (A) (A) (A) (A) (A) (A)
                 (A) (A) (A) (A) (A) (A) (A) (A) (A) (A) (A) (A)
                 (A) (A) (A) (A) (A) (A) (A) (A) (A) (A) (A) (A)
                 (A) (A) (A) (A) (A) (A) (A) (A) (A) (A) (A) (A)
                 (A) (A) (A) (A) (A) (A) (A) (A) (A) (A) (A) (A)
                 (A) (A) (A) (A) (A) (A) (A) (A) (A) (A) (A) (A)
                 (A) (A) (A) (A) (A) (A) (A) (A) (A) (A) (A) (A)
                 (A) (A) (A) (A) (A) (A) (A) (A) (A) (A) (A) (A)
                 (A) (A) (A) (A) (A) (A) (A) (A) (A) (A) (A) (A)
                 (A) (A) (A) (A) (A) (A) (A) (A) (A) (A) (A) (A)
                 (A) (A) (A) (A) (A) (A) (A) (A) (A) (A) (A) (A)
                 (A) (A) (A) (A) (A) (A) (A) (A) (A)
 Harris functional with IExCor=  402 diagonalized for initial guess.
 ExpMin= 1.61D-01 ExpMax= 5.48D+03 ExpMxC= 8.25D+02 IAcc=1 IRadAn=         1 AccDes= 1.00D-06
 HarFok:  IExCor= 402 AccDes= 1.00D-06 IRadAn=         1 IDoV=1
 ScaDFX=  1.000000  1.000000  1.000000  1.000000
 Requested convergence on RMS density matrix=1.00D-08 within 128 cycles.
 Requested convergence on MAX density matrix=1.00D-06.
 Requested convergence on             energy=1.00D-06.
 No special actions if energy rises.
 Integral accuracy reduced to 1.0D-05 until final iterations.
 Initial convergence to 1.0D-05 achieved.  Increase integral accuracy.
 SCF Done:  E(RB+HF-LYP) =  -1345.22832607     A.U. after   11 cycles
             Convg  =    0.4645D-08             -V/T =  2.0096
             S**2   =   0.0000
 ***** Axes restored to original set *****
 -------------------------------------------------------------------
 Center     Atomic                   Forces (Hartrees/Bohr)
 Number     Number              X              Y              Z
 -------------------------------------------------------------------
    1          6          -0.000059434    0.000011334   -0.000137591
    2          6          -0.000118914   -0.000022568    0.000018409
    3          6          -0.000019455    0.000033782    0.000574072
    4          6          -0.000047266    0.000002815    0.000260252
    5          6          -0.000006042    0.000023774   -0.000326318
    6          6           0.000076768    0.000025967    0.000334135
    7          8           0.000168569   -0.000004397   -0.000282663
    8          6          -0.000030938   -0.000017339   -0.000412342
    9          6          -0.000034946   -0.000066220    0.000335516
   10          6           0.000603803    0.000424092   -0.000385950
   11          6          -0.000043896   -0.000032603   -0.000019576
   12          6           0.000103599   -0.000139050    0.000021914
   13          6          -0.000123686    0.000011378   -0.000066577
   14          6          -0.000468011   -0.000086997   -0.000279659
   15          6          -0.000131722   -0.000066047    0.000094708
   16          6          -0.000063242   -0.000079551    0.000013176
   17          8           0.000322926    0.000100459    0.000028948
   18          6           0.000037805    0.000004315   -0.000368277
   19          6          -0.000037919    0.000037730   -0.000030219
   20          6          -0.000009935    0.000011513   -0.000078689
   21          6          -0.000079066    0.000063300    0.000027280
   22          6          -0.000049854    0.000023528    0.000116633
   23          6           0.000087486   -0.000033027    0.000043803
   24          6           0.000046076   -0.000080024   -0.000106589
   25          8          -0.000384345   -0.000139720    0.000225750
   26          6           0.000291450    0.000088310    0.000221570
   27          6           0.000002506   -0.000090976    0.000094451
   28          6           0.000104732    0.000096607    0.000019260
   29          6           0.000019968    0.000071503   -0.000076707
   30          6          -0.000110278   -0.000068765   -0.000052153
   31          6          -0.000046215   -0.000079765    0.000015034
   32          6           0.000030346    0.000009152    0.000070637
   33          1          -0.000060660   -0.000021046    0.000014720
   34          1          -0.000053829   -0.000014219    0.000020592
   35          1           0.000091661   -0.000009719    0.000051859
   36          1           0.000065664   -0.000001774   -0.000005104
   37          1           0.000111703   -0.000003854    0.000080154
   38          1           0.000149995   -0.000023348    0.000151854
   39          1           0.000068685    0.000066843   -0.000039683
   40          1           0.000023263    0.000004634   -0.000127625
   41          1          -0.000055327    0.000004469    0.000022640
   42          1          -0.000171916   -0.000024259   -0.000162971
   43          1          -0.000019690    0.000000648    0.000044278
   44          1          -0.000016049   -0.000038826    0.000039432
   45          1          -0.000055881    0.000041693   -0.000021104
   46          1          -0.000038726    0.000036354    0.000003784
   47          1          -0.000015908    0.000001958    0.000040129
   48          1           0.000028404   -0.000021406    0.000019159
   49          1           0.000046937   -0.000031603    0.000005341
   50          1          -0.000005811   -0.000010418   -0.000016872
   51          1          -0.000070699    0.000023353   -0.000006006
   52          1           0.000006499    0.000059556   -0.000029560
   53          1          -0.000001902    0.000026287   -0.000029847
   54          1          -0.000039237   -0.000011982   -0.000014200
   55          1          -0.000017711   -0.000042250    0.000020717
   56          1          -0.000000337   -0.000043599    0.000046076
 -------------------------------------------------------------------
 Cartesian Forces:  Max     0.000603803 RMS     0.000136638

 GradGradGradGradGradGradGradGradGradGradGradGradGradGradGradGradGradGrad
 Berny optimization.
 Internal  Forces:  Max     0.000614023 RMS     0.000119608
 Search for a local minimum.
 Step number   6 out of a maximum of 298
 All quantities printed in internal units (Hartrees-Bohrs-Radians)
 Update second derivatives using D2CorX and points  1  2  4  3  5
                                                        6
 Trust test= 8.73D-01 RLast= 7.55D-02 DXMaxT set to 2.27D-01
     Eigenvalues ---    0.00513   0.00653   0.00676   0.00910   0.01169
     Eigenvalues ---    0.01591   0.01603   0.01603   0.01605   0.01764
     Eigenvalues ---    0.01853   0.02010   0.02094   0.02146   0.02190
     Eigenvalues ---    0.02220   0.02230   0.02240   0.02242   0.02251
     Eigenvalues ---    0.02255   0.02258   0.02261   0.02262   0.02263
     Eigenvalues ---    0.02264   0.02265   0.02267   0.02267   0.02273
     Eigenvalues ---    0.02273   0.02275   0.02277   0.02280   0.02284
     Eigenvalues ---    0.02287   0.02287   0.02290   0.02293   0.02294
     Eigenvalues ---    0.02295   0.02302   0.02303   0.02324   0.02351
     Eigenvalues ---    0.02421   0.02435   0.03016   0.04823   0.06440
     Eigenvalues ---    0.06443   0.07300   0.07357   0.11397   0.11483
     Eigenvalues ---    0.13924   0.13927   0.14984   0.15998   0.15998
     Eigenvalues ---    0.15998   0.15999   0.15999   0.16000   0.16000
     Eigenvalues ---    0.16000   0.16000   0.16000   0.16000   0.16000
     Eigenvalues ---    0.16000   0.16000   0.16000   0.16001   0.16001
     Eigenvalues ---    0.16012   0.16240   0.21803   0.22000   0.22000
     Eigenvalues ---    0.22000   0.22000   0.22001   0.22003   0.22010
     Eigenvalues ---    0.22020   0.22139   0.22857   0.22977   0.23429
     Eigenvalues ---    0.23472   0.23733   0.24018   0.24507   0.24981
     Eigenvalues ---    0.24989   0.24994   0.25000   0.25000   0.25000
     Eigenvalues ---    0.25034   0.25179   0.26472   0.31435   0.31490
     Eigenvalues ---    0.33042   0.34214   0.35107   0.35149   0.35345
     Eigenvalues ---    0.35362   0.35705   0.36388   0.36390   0.36418
     Eigenvalues ---    0.36468   0.36504   0.36509   0.36516   0.36518
     Eigenvalues ---    0.36520   0.36576   0.36630   0.36650   0.36687
     Eigenvalues ---    0.36715   0.36759   0.36764   0.36852   0.36929
     Eigenvalues ---    0.36981   0.37611   0.41917   0.42693   0.43116
     Eigenvalues ---    0.43397   0.43397   0.43441   0.43486   0.43493
     Eigenvalues ---    0.44526   0.44624   0.46487   0.47050   0.47237
     Eigenvalues ---    0.47308   0.47516   0.47678   0.47785   0.47894
     Eigenvalues ---    0.47915   0.48146   0.48172   0.48193   0.48533
     Eigenvalues ---    0.49120   0.49770   0.53029   0.56225   0.58161
     Eigenvalues ---    0.59702   0.981871000.000001000.000001000.00000
     Eigenvalues --- 1000.000001000.000001000.000001000.000001000.00000
     Eigenvalues --- 1000.000001000.000001000.000001000.000001000.00000
     Eigenvalues --- 1000.000001000.000001000.000001000.000001000.00000
     Eigenvalues --- 1000.000001000.000001000.000001000.000001000.00000
     Eigenvalues --- 1000.000001000.000001000.000001000.000001000.00000
     Eigenvalues --- 1000.000001000.000001000.000001000.000001000.00000
     Eigenvalues --- 1000.000001000.000001000.000001000.000001000.00000
     Eigenvalues --- 1000.000001000.000001000.000001000.000001000.00000
     Eigenvalues --- 1000.000001000.000001000.000001000.000001000.00000
     Eigenvalues --- 1000.000001000.000001000.000001000.000001000.00000
     Eigenvalues --- 1000.000001000.000001000.000001000.000001000.00000
     Eigenvalues --- 1000.000001000.000001000.000001000.000001000.00000
     Eigenvalues --- 1000.000001000.000001000.000001000.000001000.00000
     Eigenvalues --- 1000.000001000.000001000.000001000.000001000.00000
     Eigenvalues --- 1000.000001000.000001000.000001000.000001000.00000
     Eigenvalues --- 1000.000001000.000001000.000001000.000001000.00000
     Eigenvalues --- 1000.000001000.000001000.000001000.000001000.00000
     Eigenvalues --- 1000.000001000.000001000.000001000.000001000.00000
     Eigenvalues --- 1000.000001000.000001000.000001000.000001000.00000
     Eigenvalues --- 1000.000001000.000001000.000001000.000001000.00000
     Eigenvalues --- 1000.000001000.000001000.000001000.000001000.00000
     Eigenvalues --- 1000.000001000.000001000.000001000.000001000.00000
     Eigenvalues --- 1000.000001000.000001000.000001000.000001000.00000
     Eigenvalues --- 1000.000001000.000001000.000001000.000001000.00000
     Eigenvalues --- 1000.000001000.000001000.00000
 RFO step:  Lambda=-1.28173748D-05.
 Quartic linear search produced a step of -0.10590.
 Iteration  1 RMS(Cart)=  0.01467271 RMS(Int)=  0.00002195
 Iteration  2 RMS(Cart)=  0.00007384 RMS(Int)=  0.00000022
 Iteration  3 RMS(Cart)=  0.00000000 RMS(Int)=  0.00000022
 Variable       Old X    -DE/DX   Delta X   Delta X   Delta X     New X
                                 (Linear)    (Quad)   (Total)
    R1        2.61241   0.00014   0.00004   0.00017   0.00021   2.61262
    R2        2.66975   0.00014   0.00008   0.00009   0.00017   2.66992
    R3        2.05102   0.00005   0.00005   0.00000   0.00005   2.05107
    R4        2.65819   0.00018   0.00008   0.00012   0.00020   2.65839
    R5        2.05002   0.00006   0.00009  -0.00006   0.00003   2.05005
    R6        2.64546   0.00002   0.00004  -0.00003   0.00001   2.64547
    R7        2.57306  -0.00055  -0.00014  -0.00046  -0.00061   2.57245
    R8        2.63356   0.00023   0.00013   0.00006   0.00020   2.63375
    R9        2.04639   0.00010   0.00010   0.00004   0.00013   2.04652
   R10        2.65381  -0.00002  -0.00009   0.00025   0.00016   2.65397
   R11        2.05335   0.00006   0.00007  -0.00002   0.00006   2.05341
   R12        2.75265   0.00026   0.00017   0.00011   0.00028   2.75293
   R13        2.70321  -0.00021  -0.00041   0.00072   0.00030   2.70351
   R14        2.55025  -0.00001  -0.00007   0.00020   0.00013   2.55038
   R15        2.05819   0.00007   0.00009  -0.00002   0.00007   2.05826
   R16        2.79993   0.00038   0.00039  -0.00010   0.00029   2.80023
   R17        2.04898  -0.00009   0.00003  -0.00029  -0.00027   2.04872
   R18        2.82727   0.00048   0.00021   0.00073   0.00094   2.82821
   R19        2.32964  -0.00046  -0.00027   0.00040   0.00013   2.32977
   R20        2.64898   0.00011  -0.00008   0.00043   0.00035   2.64934
   R21        2.65861   0.00041   0.00009   0.00062   0.00071   2.65932
   R22        2.62847   0.00010   0.00008  -0.00008   0.00001   2.62847
   R23        2.04951   0.00009   0.00012  -0.00003   0.00009   2.04960
   R24        2.65116  -0.00001   0.00007  -0.00020  -0.00013   2.65103
   R25        2.04677   0.00013   0.00010   0.00008   0.00018   2.04696
   R26        2.65190   0.00010   0.00008  -0.00004   0.00004   2.65194
   R27        2.57365  -0.00057  -0.00021  -0.00033  -0.00054   2.57311
   R28        2.62066   0.00014   0.00003   0.00019   0.00022   2.62088
   R29        2.04990   0.00005   0.00009  -0.00006   0.00003   2.04993
   R30        2.04952  -0.00012   0.00004  -0.00038  -0.00034   2.04919
   R31        2.70303  -0.00023  -0.00039   0.00061   0.00022   2.70325
   R32        2.85082   0.00004   0.00010  -0.00020  -0.00010   2.85072
   R33        2.07937  -0.00002   0.00014  -0.00037  -0.00023   2.07915
   R34        2.07497   0.00001   0.00014  -0.00028  -0.00014   2.07483
   R35        2.64641   0.00013   0.00006   0.00009   0.00015   2.64656
   R36        2.64187   0.00009  -0.00002   0.00023   0.00021   2.64207
   R37        2.63339   0.00013   0.00004   0.00015   0.00018   2.63357
   R38        2.05078   0.00006   0.00009  -0.00004   0.00005   2.05082
   R39        2.63971   0.00014   0.00008   0.00005   0.00013   2.63985
   R40        2.05242   0.00005   0.00007  -0.00004   0.00004   2.05245
   R41        2.63507   0.00019   0.00003   0.00027   0.00031   2.63537
   R42        2.05218   0.00004   0.00007  -0.00005   0.00002   2.05220
   R43        2.63784   0.00014   0.00008   0.00003   0.00012   2.63796
   R44        2.05221   0.00004   0.00007  -0.00006   0.00001   2.05222
   R45        2.05446   0.00005   0.00008  -0.00003   0.00004   2.05450
   R46        2.85125   0.00003   0.00008  -0.00018  -0.00010   2.85116
   R47        2.07907   0.00001   0.00014  -0.00030  -0.00015   2.07892
   R48        2.07477   0.00001   0.00014  -0.00029  -0.00015   2.07461
   R49        2.64185   0.00011  -0.00001   0.00024   0.00023   2.64208
   R50        2.64638   0.00011   0.00006   0.00006   0.00012   2.64650
   R51        2.63787   0.00012   0.00009   0.00001   0.00009   2.63796
   R52        2.05444   0.00006   0.00008  -0.00002   0.00006   2.05450
   R53        2.63508   0.00019   0.00004   0.00027   0.00031   2.63539
   R54        2.05226   0.00004   0.00007  -0.00006   0.00001   2.05227
   R55        2.63970   0.00013   0.00008   0.00006   0.00014   2.63984
   R56        2.05223   0.00004   0.00007  -0.00005   0.00002   2.05225
   R57        2.63345   0.00013   0.00003   0.00017   0.00020   2.63366
   R58        2.05247   0.00005   0.00007  -0.00004   0.00003   2.05250
   R59        2.05070   0.00006   0.00009  -0.00006   0.00003   2.05073
    A1        2.11741  -0.00002   0.00000  -0.00007  -0.00006   2.11735
    A2        2.07415  -0.00003  -0.00005  -0.00008  -0.00013   2.07401
    A3        2.09162   0.00006   0.00005   0.00015   0.00020   2.09182
    A4        2.10029  -0.00006  -0.00006  -0.00008  -0.00013   2.10015
    A5        2.11790   0.00002   0.00004  -0.00004  -0.00001   2.11790
    A6        2.06500   0.00004   0.00002   0.00012   0.00014   2.06514
    A7        2.08623   0.00005   0.00001   0.00019   0.00020   2.08643
    A8        2.01549   0.00018   0.00007   0.00043   0.00050   2.01598
    A9        2.18146  -0.00023  -0.00008  -0.00061  -0.00069   2.18077
   A10        2.08313   0.00001   0.00005  -0.00009  -0.00005   2.08309
   A11        2.11536  -0.00001  -0.00001  -0.00001  -0.00003   2.11534
   A12        2.08469   0.00000  -0.00004   0.00011   0.00007   2.08476
   A13        2.13187  -0.00006  -0.00009  -0.00001  -0.00010   2.13176
   A14        2.07627   0.00000  -0.00007   0.00017   0.00010   2.07637
   A15        2.07505   0.00006   0.00016  -0.00015   0.00001   2.07505
   A16        2.04744   0.00008   0.00009   0.00006   0.00015   2.04759
   A17        2.15915   0.00000  -0.00009   0.00024   0.00015   2.15930
   A18        2.07660  -0.00008   0.00000  -0.00030  -0.00030   2.07630
   A19        2.07118  -0.00029  -0.00016  -0.00079  -0.00096   2.07023
   A20        2.24013  -0.00007  -0.00005  -0.00011  -0.00016   2.23997
   A21        2.02685  -0.00009  -0.00026   0.00017  -0.00009   2.02675
   A22        2.01621   0.00016   0.00031  -0.00006   0.00026   2.01646
   A23        2.09456  -0.00013  -0.00017  -0.00018  -0.00035   2.09421
   A24        2.11375  -0.00013   0.00026  -0.00150  -0.00124   2.11250
   A25        2.07472   0.00026  -0.00010   0.00168   0.00158   2.07630
   A26        2.07815   0.00061  -0.00010   0.00268   0.00258   2.08073
   A27        2.11314  -0.00039   0.00002  -0.00153  -0.00151   2.11164
   A28        2.09182  -0.00022   0.00009  -0.00114  -0.00105   2.09077
   A29        2.05566  -0.00045  -0.00015  -0.00137  -0.00152   2.05414
   A30        2.16823   0.00061   0.00005   0.00218   0.00223   2.17046
   A31        2.05915  -0.00017   0.00009  -0.00080  -0.00070   2.05845
   A32        2.12485   0.00007  -0.00008   0.00047   0.00039   2.12525
   A33        2.05524  -0.00001   0.00024  -0.00065  -0.00042   2.05482
   A34        2.10309  -0.00006  -0.00016   0.00018   0.00002   2.10312
   A35        2.08420   0.00004   0.00003  -0.00003   0.00000   2.08419
   A36        2.08557  -0.00001   0.00002   0.00000   0.00003   2.08559
   A37        2.11342  -0.00003  -0.00005   0.00002  -0.00002   2.11340
   A38        2.08807   0.00006   0.00002   0.00011   0.00013   2.08820
   A39        2.17825  -0.00031  -0.00012  -0.00079  -0.00090   2.17735
   A40        2.01686   0.00026   0.00009   0.00068   0.00077   2.01763
   A41        2.09753  -0.00007  -0.00005  -0.00013  -0.00019   2.09735
   A42        2.06724   0.00004   0.00004   0.00006   0.00010   2.06734
   A43        2.11841   0.00003   0.00001   0.00007   0.00008   2.11849
   A44        2.11251   0.00007  -0.00001   0.00038   0.00036   2.11288
   A45        2.10498   0.00018  -0.00003   0.00114   0.00111   2.10609
   A46        2.06545  -0.00025   0.00003  -0.00148  -0.00145   2.06400
   A47        2.07229  -0.00035  -0.00010  -0.00120  -0.00131   2.07098
   A48        1.90156  -0.00012  -0.00008  -0.00045  -0.00053   1.90103
   A49        1.90370   0.00006   0.00013  -0.00016  -0.00003   1.90367
   A50        1.92260   0.00005   0.00020  -0.00029  -0.00008   1.92252
   A51        1.92983  -0.00004  -0.00009  -0.00011  -0.00019   1.92964
   A52        1.92823   0.00002  -0.00009   0.00037   0.00028   1.92851
   A53        1.87780   0.00003  -0.00008   0.00063   0.00056   1.87836
   A54        2.10599  -0.00001  -0.00006   0.00014   0.00008   2.10607
   A55        2.09742  -0.00003   0.00001  -0.00012  -0.00012   2.09730
   A56        2.07914   0.00003   0.00005  -0.00003   0.00002   2.07917
   A57        2.10037   0.00001  -0.00001   0.00004   0.00003   2.10040
   A58        2.08249   0.00003   0.00002   0.00009   0.00012   2.08261
   A59        2.10023  -0.00004  -0.00001  -0.00013  -0.00015   2.10008
   A60        2.09850  -0.00001  -0.00002   0.00001  -0.00002   2.09848
   A61        2.08992  -0.00001   0.00002  -0.00011  -0.00008   2.08984
   A62        2.09477   0.00002   0.00000   0.00010   0.00010   2.09486
   A63        2.08936  -0.00001   0.00001  -0.00005  -0.00004   2.08932
   A64        2.09676   0.00000  -0.00003   0.00006   0.00003   2.09679
   A65        2.09706   0.00001   0.00002  -0.00001   0.00001   2.09707
   A66        2.09456   0.00001   0.00001   0.00005   0.00006   2.09462
   A67        2.09764   0.00000   0.00003  -0.00005  -0.00002   2.09762
   A68        2.09094  -0.00002  -0.00004   0.00000  -0.00004   2.09090
   A69        2.10438  -0.00003  -0.00004  -0.00003  -0.00006   2.10432
   A70        2.08851   0.00004   0.00004   0.00007   0.00011   2.08863
   A71        2.09028  -0.00001   0.00000  -0.00004  -0.00005   2.09024
   A72        1.90130  -0.00013  -0.00014  -0.00032  -0.00046   1.90084
   A73        1.90434   0.00004   0.00015  -0.00031  -0.00017   1.90417
   A74        1.92358   0.00006   0.00020  -0.00018   0.00002   1.92360
   A75        1.92927   0.00000  -0.00008   0.00010   0.00002   1.92929
   A76        1.92763   0.00000  -0.00005   0.00014   0.00008   1.92771
   A77        1.87763   0.00003  -0.00006   0.00058   0.00051   1.87815
   A78        2.09733  -0.00008   0.00005  -0.00041  -0.00036   2.09697
   A79        2.10614   0.00005  -0.00009   0.00039   0.00031   2.10644
   A80        2.07906   0.00003   0.00004   0.00001   0.00005   2.07911
   A81        2.10447  -0.00003  -0.00004  -0.00003  -0.00006   2.10441
   A82        2.08812   0.00004   0.00005   0.00007   0.00013   2.08825
   A83        2.09059  -0.00002  -0.00002  -0.00005  -0.00006   2.09053
   A84        2.09453   0.00001   0.00002   0.00004   0.00005   2.09459
   A85        2.09098  -0.00002  -0.00005   0.00003  -0.00002   2.09096
   A86        2.09762   0.00000   0.00003  -0.00006  -0.00003   2.09760
   A87        2.08932  -0.00002   0.00000  -0.00004  -0.00004   2.08928
   A88        2.09704   0.00001   0.00002   0.00000   0.00002   2.09706
   A89        2.09681   0.00000  -0.00002   0.00005   0.00002   2.09684
   A90        2.09852  -0.00001  -0.00002   0.00002   0.00000   2.09853
   A91        2.09471   0.00001   0.00000   0.00008   0.00008   2.09479
   A92        2.08995  -0.00001   0.00002  -0.00010  -0.00008   2.08987
   A93        2.10040   0.00000   0.00000   0.00000   0.00000   2.10040
   A94        2.08216   0.00002   0.00005  -0.00002   0.00003   2.08219
   A95        2.10052  -0.00002  -0.00005   0.00002  -0.00003   2.10050
    D1       -0.00048   0.00000   0.00006  -0.00012  -0.00006  -0.00055
    D2        3.14063   0.00000   0.00002  -0.00019  -0.00018   3.14045
    D3       -3.13869   0.00000   0.00008  -0.00014  -0.00006  -3.13875
    D4        0.00242   0.00000   0.00004  -0.00022  -0.00018   0.00225
    D5       -0.00018   0.00001  -0.00011   0.00068   0.00057   0.00039
    D6       -3.14074   0.00002  -0.00012   0.00118   0.00106  -3.13968
    D7        3.13799   0.00001  -0.00014   0.00070   0.00057   3.13856
    D8       -0.00257   0.00002  -0.00014   0.00120   0.00105  -0.00152
    D9       -0.00053  -0.00001   0.00004  -0.00066  -0.00062  -0.00116
   D10       -3.13882  -0.00002   0.00003  -0.00098  -0.00095  -3.13977
   D11        3.14153  -0.00001   0.00008  -0.00059  -0.00051   3.14101
   D12        0.00324  -0.00002   0.00007  -0.00091  -0.00084   0.00240
   D13        0.00219   0.00002  -0.00008   0.00086   0.00078   0.00297
   D14       -3.13789   0.00001  -0.00004   0.00047   0.00043  -3.13746
   D15        3.14014   0.00003  -0.00007   0.00121   0.00114   3.14128
   D16        0.00006   0.00002  -0.00002   0.00082   0.00079   0.00085
   D17       -3.11248  -0.00002   0.00007  -0.00091  -0.00084  -3.11331
   D18        0.03263  -0.00003   0.00006  -0.00124  -0.00118   0.03144
   D19       -0.00294  -0.00001   0.00002  -0.00028  -0.00026  -0.00320
   D20        3.14017  -0.00001   0.00005  -0.00045  -0.00040   3.13977
   D21        3.13717   0.00000  -0.00002   0.00010   0.00008   3.13725
   D22       -0.00290   0.00000   0.00001  -0.00007  -0.00006  -0.00296
   D23        0.00191  -0.00001   0.00007  -0.00048  -0.00041   0.00150
   D24       -3.14066  -0.00002   0.00008  -0.00095  -0.00087  -3.14153
   D25       -3.14120  -0.00001   0.00005  -0.00031  -0.00027  -3.14147
   D26       -0.00059  -0.00001   0.00005  -0.00078  -0.00073  -0.00131
   D27       -0.03095   0.00002  -0.00056   0.00238   0.00182  -0.02913
   D28        3.11149  -0.00001  -0.00058   0.00131   0.00073   3.11222
   D29        3.11169   0.00003  -0.00056   0.00288   0.00231   3.11400
   D30       -0.02906   0.00000  -0.00058   0.00181   0.00123  -0.02783
   D31        3.09397  -0.00007   0.00036  -0.00400  -0.00364   3.09033
   D32        0.98586   0.00001   0.00043  -0.00350  -0.00307   0.98280
   D33       -1.07145  -0.00009   0.00032  -0.00400  -0.00368  -1.07513
   D34        3.12956  -0.00005  -0.00029  -0.00128  -0.00157   3.12798
   D35        0.00774  -0.00004   0.00028  -0.00168  -0.00140   0.00634
   D36       -0.01288  -0.00003  -0.00027  -0.00022  -0.00049  -0.01337
   D37       -3.13470  -0.00001   0.00030  -0.00062  -0.00031  -3.13501
   D38        3.07289  -0.00001  -0.00209   0.00600   0.00391   3.07680
   D39       -0.08171   0.00007  -0.00100   0.00661   0.00561  -0.07610
   D40       -0.08803  -0.00003  -0.00265   0.00635   0.00370  -0.08433
   D41        3.04055   0.00005  -0.00156   0.00696   0.00540   3.04595
   D42        2.96271   0.00007  -0.00214   0.01096   0.00882   2.97153
   D43       -0.19742   0.00006  -0.00290   0.01232   0.00942  -0.18800
   D44       -0.16604   0.00000  -0.00322   0.01037   0.00715  -0.15889
   D45        2.95702  -0.00001  -0.00398   0.01172   0.00775   2.96476
   D46        3.13381   0.00003  -0.00019   0.00122   0.00103   3.13484
   D47       -0.00639  -0.00001  -0.00030   0.00020  -0.00009  -0.00649
   D48        0.00957   0.00003   0.00053  -0.00009   0.00044   0.01002
   D49       -3.13063  -0.00001   0.00042  -0.00110  -0.00069  -3.13132
   D50       -3.12448  -0.00002   0.00037  -0.00163  -0.00125  -3.12573
   D51       -0.00705   0.00000   0.00004   0.00007   0.00011  -0.00695
   D52       -0.00145  -0.00003  -0.00039  -0.00027  -0.00066  -0.00212
   D53        3.11597  -0.00001  -0.00073   0.00143   0.00070   3.11666
   D54       -0.01012  -0.00001  -0.00030   0.00024  -0.00006  -0.01018
   D55        3.13006   0.00000  -0.00019   0.00037   0.00018   3.13024
   D56        3.13005   0.00002  -0.00019   0.00129   0.00110   3.13115
   D57       -0.01296   0.00003  -0.00007   0.00141   0.00134  -0.01162
   D58        0.00246  -0.00001  -0.00007  -0.00005  -0.00013   0.00233
   D59        3.14136   0.00002   0.00016   0.00045   0.00061  -3.14122
   D60       -3.13770  -0.00002  -0.00019  -0.00018  -0.00037  -3.13806
   D61        0.00120   0.00001   0.00005   0.00032   0.00037   0.00157
   D62        0.00544   0.00000   0.00020  -0.00030  -0.00009   0.00534
   D63       -3.13321   0.00000   0.00032  -0.00080  -0.00048  -3.13369
   D64       -3.13370  -0.00002  -0.00001  -0.00076  -0.00077  -3.13447
   D65        0.01084  -0.00003   0.00010  -0.00126  -0.00116   0.00968
   D66        0.04154  -0.00003  -0.00047   0.00004  -0.00043   0.04111
   D67       -3.10265   0.00000  -0.00024   0.00053   0.00029  -3.10236
   D68       -0.00594   0.00001   0.00004   0.00047   0.00050  -0.00544
   D69       -3.12389  -0.00001   0.00037  -0.00123  -0.00086  -3.12476
   D70        3.13262   0.00002  -0.00008   0.00098   0.00090   3.13352
   D71        0.01466   0.00000   0.00025  -0.00071  -0.00046   0.01420
   D72        3.08966  -0.00005   0.00015  -0.00323  -0.00309   3.08657
   D73        0.98201   0.00000   0.00024  -0.00297  -0.00273   0.97928
   D74       -1.07606  -0.00009   0.00011  -0.00338  -0.00327  -1.07932
   D75       -0.77267   0.00000  -0.00029   0.00066   0.00037  -0.77229
   D76        2.40752   0.00001  -0.00035   0.00107   0.00071   2.40823
   D77        1.31933  -0.00002  -0.00023   0.00012  -0.00011   1.31922
   D78       -1.78367  -0.00002  -0.00029   0.00052   0.00023  -1.78344
   D79       -2.88700   0.00001  -0.00044   0.00107   0.00064  -2.88636
   D80        0.29319   0.00001  -0.00050   0.00148   0.00098   0.29416
   D81       -3.10350   0.00001  -0.00003   0.00060   0.00058  -3.10292
   D82        0.05335   0.00001  -0.00003   0.00047   0.00044   0.05379
   D83       -0.00009   0.00001   0.00003   0.00020   0.00024   0.00014
   D84       -3.12643   0.00000   0.00003   0.00007   0.00010  -3.12633
   D85        3.09514  -0.00002  -0.00007  -0.00060  -0.00068   3.09446
   D86       -0.05005   0.00000   0.00010  -0.00041  -0.00031  -0.05037
   D87       -0.00845  -0.00001  -0.00014  -0.00021  -0.00034  -0.00880
   D88        3.12954   0.00000   0.00004  -0.00002   0.00002   3.12955
   D89        0.00777   0.00000   0.00003  -0.00008  -0.00005   0.00772
   D90       -3.13549   0.00000  -0.00001  -0.00011  -0.00012  -3.13561
   D91        3.13395   0.00000   0.00004   0.00006   0.00009   3.13405
   D92       -0.00931   0.00000   0.00000   0.00003   0.00002  -0.00928
   D93       -0.00691   0.00000   0.00000  -0.00004  -0.00004  -0.00695
   D94        3.13938   0.00000   0.00000  -0.00003  -0.00003   3.13935
   D95        3.13636   0.00000   0.00004  -0.00001   0.00003   3.13638
   D96       -0.00054   0.00000   0.00004   0.00000   0.00004  -0.00049
   D97       -0.00160   0.00000  -0.00010   0.00004  -0.00006  -0.00166
   D98       -3.13300   0.00000  -0.00001   0.00000  -0.00001  -3.13302
   D99        3.13529  -0.00001  -0.00010   0.00003  -0.00008   3.13521
   D100       0.00389   0.00000  -0.00001  -0.00001  -0.00003   0.00386
   D101       0.00934   0.00001   0.00017   0.00009   0.00026   0.00960
   D102      -3.12865   0.00000   0.00000  -0.00010  -0.00010  -3.12875
   D103       3.14078   0.00001   0.00008   0.00013   0.00021   3.14099
   D104       0.00279  -0.00001  -0.00009  -0.00006  -0.00015   0.00264
   D105       2.41472   0.00003  -0.00067   0.00458   0.00391   2.41862
   D106      -0.76597   0.00003  -0.00057   0.00421   0.00364  -0.76233
   D107      -1.77619   0.00000  -0.00063   0.00406   0.00342  -1.77276
   D108       1.32631   0.00000  -0.00053   0.00368   0.00315   1.32947
   D109       0.29972   0.00003  -0.00079   0.00492   0.00413   0.30385
   D110      -2.88096   0.00003  -0.00069   0.00455   0.00386  -2.87711
   D111       3.09467  -0.00001  -0.00002  -0.00065  -0.00067   3.09400
   D112      -0.04985  -0.00001   0.00010  -0.00060  -0.00050  -0.05035
   D113      -0.00843  -0.00001  -0.00012  -0.00029  -0.00041  -0.00885
   D114       3.13023  -0.00001   0.00001  -0.00025  -0.00024   3.12999
   D115      -3.10305   0.00001  -0.00005   0.00057   0.00053  -3.10252
   D116       0.05369   0.00001  -0.00004   0.00050   0.00047   0.05416
   D117      -0.00014   0.00001   0.00005   0.00019   0.00025   0.00010
   D118      -3.12658   0.00001   0.00006   0.00013   0.00019  -3.12639
   D119       0.00953   0.00001   0.00012   0.00017   0.00030   0.00983
   D120       3.14080   0.00001   0.00007   0.00012   0.00019   3.14099
   D121      -3.12913   0.00000   0.00000   0.00013   0.00013  -3.12900
   D122       0.00214   0.00000  -0.00006   0.00008   0.00002   0.00216
   D123      -0.00196   0.00000  -0.00006   0.00005  -0.00002  -0.00198
   D124       3.13518  -0.00001  -0.00008  -0.00010  -0.00017   3.13500
   D125      -3.13319   0.00000  -0.00001   0.00010   0.00009  -3.13311
   D126       0.00395   0.00000  -0.00002  -0.00005  -0.00007   0.00388
   D127      -0.00658   0.00000   0.00000  -0.00014  -0.00014  -0.00672
   D128       3.13674   0.00000   0.00001  -0.00014  -0.00012   3.13661
   D129       3.13947   0.00000   0.00001   0.00000   0.00001   3.13948
   D130      -0.00040   0.00000   0.00003   0.00000   0.00003  -0.00037
   D131       0.00764   0.00000   0.00000   0.00002   0.00003   0.00767
   D132       3.13392   0.00000  -0.00001   0.00009   0.00008   3.13401
   D133      -3.13567   0.00000  -0.00001   0.00002   0.00001  -3.13566
   D134      -0.00939   0.00000  -0.00002   0.00008   0.00007  -0.00932
         Item               Value     Threshold  Converged?
 Maximum Force            0.000614     0.000450     NO 
 RMS     Force            0.000120     0.000300     YES
 Maximum Displacement     0.052866     0.001800     NO 
 RMS     Displacement     0.014641     0.001200     NO 
 Predicted change in Energy=-6.890484D-06
 GradGradGradGradGradGradGradGradGradGradGradGradGradGradGradGradGradGrad

 Stoichiometry    C29H24O3
 Framework group  C1[X(C29H24O3)]
 Deg. of freedom   162
 Full point group                 C1      NOp   1
 Largest Abelian subgroup         C1      NOp   1
 Largest concise Abelian subgroup C1      NOp   1
                         Standard orientation:                         
 ---------------------------------------------------------------------
 Center     Atomic     Atomic              Coordinates (Angstroms)
 Number     Number      Type              X           Y           Z
 ---------------------------------------------------------------------
    1          6             0        2.780184   -0.160754    0.075967
    2          6             0        4.058787   -0.686660    0.077696
    3          6             0        5.175039    0.159282   -0.053947
    4          6             0        4.983158    1.539458   -0.188387
    5          6             0        3.687297    2.052484   -0.185855
    6          6             0        2.557643    1.228210   -0.056043
    7          8             0        6.386151   -0.462133   -0.041987
    8          6             0        1.234762    1.838272   -0.062200
    9          6             0        0.032329    1.230894    0.019494
   10          6             0       -1.208532    2.040835    0.013386
   11          6             0       -2.534256    1.346357    0.020221
   12          6             0       -3.679015    2.129530    0.224379
   13          6             0       -4.953798    1.573293    0.238857
   14          6             0       -5.106124    0.194100    0.032342
   15          6             0       -3.972695   -0.604905   -0.182848
   16          6             0       -2.708316   -0.034934   -0.184963
   17          8             0       -6.299015   -0.462386    0.023890
   18          6             0        7.568020    0.338523   -0.136092
   19          6             0        8.776263   -0.558457   -0.029972
   20          6             0        8.831543   -1.571135    0.935854
   21          6             0        9.969721   -2.365973    1.058221
   22          6             0       11.069564   -2.152841    0.223726
   23          6             0       11.021355   -1.145539   -0.739536
   24          6             0        9.876903   -0.356652   -0.868197
   25          8             0       -1.162386    3.272833    0.014755
   26          6             0       -7.500695    0.296105    0.188150
   27          6             0       -8.684653   -0.631226    0.066993
   28          6             0       -9.773292   -0.497035    0.933952
   29          6             0      -10.897379   -1.312791    0.793779
   30          6             0      -10.936582   -2.279871   -0.210262
   31          6             0       -9.848405   -2.425498   -1.074039
   32          6             0       -8.730910   -1.603604   -0.939809
   33          1             0        1.936573   -0.835423    0.181783
   34          1             0        4.230288   -1.752953    0.180076
   35          1             0        5.822963    2.214833   -0.295289
   36          1             0        3.545660    3.124894   -0.288890
   37          1             0        1.207759    2.924141   -0.142730
   38          1             0       -0.044625    0.153177    0.108677
   39          1             0       -3.541686    3.195164    0.372446
   40          1             0       -5.812169    2.211345    0.410368
   41          1             0       -4.113443   -1.667785   -0.347825
   42          1             0       -1.855378   -0.678442   -0.370113
   43          1             0        7.565163    1.080611    0.676201
   44          1             0        7.578676    0.886888   -1.087241
   45          1             0        7.973599   -1.739958    1.578659
   46          1             0        9.999844   -3.152205    1.806933
   47          1             0       11.956479   -2.771794    0.321842
   48          1             0       11.868883   -0.978365   -1.397657
   49          1             0        9.839170    0.419578   -1.628487
   50          1             0       -7.541718    1.077523   -0.585128
   51          1             0       -7.503272    0.795740    1.165702
   52          1             0       -9.741911    0.247717    1.725378
   53          1             0      -11.735741   -1.198203    1.474544
   54          1             0      -11.807393   -2.919861   -0.317521
   55          1             0       -9.871562   -3.180128   -1.854865
   56          1             0       -7.881655   -1.719825   -1.605332
 ---------------------------------------------------------------------
 Rotational constants (GHZ):      0.4692480      0.0244275      0.0234630
 Standard basis: 6-31G(d,p) (6D, 7F)
 There are   600 symmetry adapted basis functions of A   symmetry.
 Integral buffers will be    262144 words long.
 Raffenetti 2 integral format.
 Two-electron integral symmetry is turned on.
   600 basis functions,  1064 primitive gaussians,   600 cartesian basis functions
   111 alpha electrons      111 beta electrons
       nuclear repulsion energy      2501.1354008729 Hartrees.
 NAtoms=   56 NActive=   56 NUniq=   56 SFac= 1.00D+00 NAtFMM=   60 Big=F
 One-electron integrals computed using PRISM.
 NBasis=   600 RedAO= T  NBF=   600
 NBsUse=   600 1.00D-06 NBFU=   600
 Initial guess read from the read-write file:
 Initial guess orbital symmetries:
       Occupied  (A) (A) (A) (A) (A) (A) (A) (A) (A) (A) (A) (A)
                 (A) (A) (A) (A) (A) (A) (A) (A) (A) (A) (A) (A)
                 (A) (A) (A) (A) (A) (A) (A) (A) (A) (A) (A) (A)
                 (A) (A) (A) (A) (A) (A) (A) (A) (A) (A) (A) (A)
                 (A) (A) (A) (A) (A) (A) (A) (A) (A) (A) (A) (A)
                 (A) (A) (A) (A) (A) (A) (A) (A) (A) (A) (A) (A)
                 (A) (A) (A) (A) (A) (A) (A) (A) (A) (A) (A) (A)
                 (A) (A) (A) (A) (A) (A) (A) (A) (A) (A) (A) (A)
                 (A) (A) (A) (A) (A) (A) (A) (A) (A) (A) (A) (A)
                 (A) (A) (A)
       Virtual   (A) (A) (A) (A) (A) (A) (A) (A) (A) (A) (A) (A)
                 (A) (A) (A) (A) (A) (A) (A) (A) (A) (A) (A) (A)
                 (A) (A) (A) (A) (A) (A) (A) (A) (A) (A) (A) (A)
                 (A) (A) (A) (A) (A) (A) (A) (A) (A) (A) (A) (A)
                 (A) (A) (A) (A) (A) (A) (A) (A) (A) (A) (A) (A)
                 (A) (A) (A) (A) (A) (A) (A) (A) (A) (A) (A) (A)
                 (A) (A) (A) (A) (A) (A) (A) (A) (A) (A) (A) (A)
                 (A) (A) (A) (A) (A) (A) (A) (A) (A) (A) (A) (A)
                 (A) (A) (A) (A) (A) (A) (A) (A) (A) (A) (A) (A)
                 (A) (A) (A) (A) (A) (A) (A) (A) (A) (A) (A) (A)
                 (A) (A) (A) (A) (A) (A) (A) (A) (A) (A) (A) (A)
                 (A) (A) (A) (A) (A) (A) (A) (A) (A) (A) (A) (A)
                 (A) (A) (A) (A) (A) (A) (A) (A) (A) (A) (A) (A)
                 (A) (A) (A) (A) (A) (A) (A) (A) (A) (A) (A) (A)
                 (A) (A) (A) (A) (A) (A) (A) (A) (A) (A) (A) (A)
                 (A) (A) (A) (A) (A) (A) (A) (A) (A) (A) (A) (A)
                 (A) (A) (A) (A) (A) (A) (A) (A) (A) (A) (A) (A)
                 (A) (A) (A) (A) (A) (A) (A) (A) (A) (A) (A) (A)
                 (A) (A) (A) (A) (A) (A) (A) (A) (A) (A) (A) (A)
                 (A) (A) (A) (A) (A) (A) (A) (A) (A) (A) (A) (A)
                 (A) (A) (A) (A) (A) (A) (A) (A) (A) (A) (A) (A)
                 (A) (A) (A) (A) (A) (A) (A) (A) (A) (A) (A) (A)
                 (A) (A) (A) (A) (A) (A) (A) (A) (A) (A) (A) (A)
                 (A) (A) (A) (A) (A) (A) (A) (A) (A) (A) (A) (A)
                 (A) (A) (A) (A) (A) (A) (A) (A) (A) (A) (A) (A)
                 (A) (A) (A) (A) (A) (A) (A) (A) (A) (A) (A) (A)
                 (A) (A) (A) (A) (A) (A) (A) (A) (A) (A) (A) (A)
                 (A) (A) (A) (A) (A) (A) (A) (A) (A) (A) (A) (A)
                 (A) (A) (A) (A) (A) (A) (A) (A) (A) (A) (A) (A)
                 (A) (A) (A) (A) (A) (A) (A) (A) (A) (A) (A) (A)
                 (A) (A) (A) (A) (A) (A) (A) (A) (A) (A) (A) (A)
                 (A) (A) (A) (A) (A) (A) (A) (A) (A) (A) (A) (A)
                 (A) (A) (A) (A) (A) (A) (A) (A) (A) (A) (A) (A)
                 (A) (A) (A) (A) (A) (A) (A) (A) (A) (A) (A) (A)
                 (A) (A) (A) (A) (A) (A) (A) (A) (A) (A) (A) (A)
                 (A) (A) (A) (A) (A) (A) (A) (A) (A) (A) (A) (A)
                 (A) (A) (A) (A) (A) (A) (A) (A) (A) (A) (A) (A)
                 (A) (A) (A) (A) (A) (A) (A) (A) (A) (A) (A) (A)
                 (A) (A) (A) (A) (A) (A) (A) (A) (A) (A) (A) (A)
                 (A) (A) (A) (A) (A) (A) (A) (A) (A) (A) (A) (A)
                 (A) (A) (A) (A) (A) (A) (A) (A) (A)
 Harris functional with IExCor=  402 diagonalized for initial guess.
 ExpMin= 1.61D-01 ExpMax= 5.48D+03 ExpMxC= 8.25D+02 IAcc=1 IRadAn=         1 AccDes= 1.00D-06
 HarFok:  IExCor= 402 AccDes= 1.00D-06 IRadAn=         1 IDoV=1
 ScaDFX=  1.000000  1.000000  1.000000  1.000000
 Requested convergence on RMS density matrix=1.00D-08 within 128 cycles.
 Requested convergence on MAX density matrix=1.00D-06.
 Requested convergence on             energy=1.00D-06.
 No special actions if energy rises.
 Integral accuracy reduced to 1.0D-05 until final iterations.
 Initial convergence to 1.0D-05 achieved.  Increase integral accuracy.
 SCF Done:  E(RB+HF-LYP) =  -1345.22833392     A.U. after   10 cycles
             Convg  =    0.4232D-08             -V/T =  2.0096
             S**2   =   0.0000
 ***** Axes restored to original set *****
 -------------------------------------------------------------------
 Center     Atomic                   Forces (Hartrees/Bohr)
 Number     Number              X              Y              Z
 -------------------------------------------------------------------
    1          6          -0.000001327    0.000014702   -0.000056924
    2          6          -0.000036499   -0.000019962   -0.000042270
    3          6          -0.000021497    0.000041708    0.000340480
    4          6          -0.000035342    0.000011917    0.000076572
    5          6          -0.000072732    0.000006002   -0.000259231
    6          6           0.000095987    0.000000472    0.000277957
    7          8           0.000258981   -0.000021155   -0.000113831
    8          6          -0.000049433    0.000008523   -0.000372211
    9          6          -0.000101471   -0.000020855    0.000253831
   10          6           0.000693863    0.000183317   -0.000402118
   11          6          -0.000177580   -0.000073912    0.000003740
   12          6           0.000080530   -0.000019867    0.000084743
   13          6           0.000025379    0.000021270    0.000009313
   14          6          -0.000324113   -0.000131435   -0.000204705
   15          6           0.000001488    0.000010071    0.000047707
   16          6           0.000098173    0.000048387   -0.000016405
   17          8           0.000287258    0.000143179   -0.000107929
   18          6          -0.000246386    0.000011118   -0.000226720
   19          6           0.000013244    0.000005739    0.000097830
   20          6           0.000025378   -0.000005850   -0.000027686
   21          6          -0.000019000    0.000016492   -0.000006026
   22          6           0.000010607   -0.000007918    0.000025438
   23          6          -0.000005276    0.000012724    0.000031753
   24          6          -0.000012437   -0.000000316   -0.000071027
   25          8          -0.000432666   -0.000080835    0.000189050
   26          6           0.000004897   -0.000063320    0.000312418
   27          6          -0.000073841   -0.000059909   -0.000029743
   28          6           0.000063584   -0.000002390    0.000023217
   29          6          -0.000006390   -0.000004122   -0.000011746
   30          6          -0.000023415   -0.000010086   -0.000018353
   31          6          -0.000005021   -0.000008001   -0.000004037
   32          6           0.000018048    0.000036332    0.000014429
   33          1          -0.000031720   -0.000012046    0.000008621
   34          1          -0.000039205   -0.000009430    0.000020793
   35          1           0.000034541   -0.000022121   -0.000016130
   36          1           0.000043774   -0.000004722    0.000008133
   37          1           0.000065103   -0.000004001    0.000084630
   38          1          -0.000054814   -0.000052489    0.000024957
   39          1           0.000033839    0.000025852   -0.000042027
   40          1           0.000031429    0.000013810   -0.000016637
   41          1          -0.000029755   -0.000008300    0.000033625
   42          1          -0.000044053   -0.000000815    0.000063532
   43          1           0.000020252    0.000026234    0.000040523
   44          1           0.000025970   -0.000043112    0.000021534
   45          1          -0.000035030    0.000026847   -0.000018149
   46          1          -0.000027697    0.000023114    0.000007223
   47          1          -0.000010207    0.000002650    0.000031219
   48          1           0.000021361   -0.000019008    0.000018499
   49          1           0.000030259   -0.000020935    0.000001897
   50          1           0.000004942   -0.000009823   -0.000059911
   51          1          -0.000025554    0.000051137   -0.000010244
   52          1           0.000003421    0.000038469   -0.000021442
   53          1          -0.000004815    0.000022802   -0.000025650
   54          1          -0.000027695   -0.000009396   -0.000013881
   55          1          -0.000015868   -0.000030006    0.000012939
   56          1          -0.000001470   -0.000026732    0.000028429
 -------------------------------------------------------------------
 Cartesian Forces:  Max     0.000693863 RMS     0.000113282

 GradGradGradGradGradGradGradGradGradGradGradGradGradGradGradGradGradGrad
 Berny optimization.
 Internal  Forces:  Max     0.000478429 RMS     0.000056133
 Search for a local minimum.
 Step number   7 out of a maximum of 298
 All quantities printed in internal units (Hartrees-Bohrs-Radians)
 Update second derivatives using D2CorX and points  1  2  4  3  5
                                                        6  7
 Trust test= 1.14D+00 RLast= 2.44D-02 DXMaxT set to 2.27D-01
     Eigenvalues ---    0.00352   0.00653   0.00675   0.00913   0.01170
     Eigenvalues ---    0.01555   0.01603   0.01603   0.01604   0.01763
     Eigenvalues ---    0.01853   0.02008   0.02094   0.02137   0.02189
     Eigenvalues ---    0.02219   0.02231   0.02239   0.02240   0.02251
     Eigenvalues ---    0.02254   0.02258   0.02259   0.02263   0.02263
     Eigenvalues ---    0.02264   0.02267   0.02267   0.02267   0.02272
     Eigenvalues ---    0.02273   0.02275   0.02280   0.02281   0.02284
     Eigenvalues ---    0.02287   0.02287   0.02291   0.02293   0.02294
     Eigenvalues ---    0.02295   0.02302   0.02303   0.02324   0.02352
     Eigenvalues ---    0.02427   0.02438   0.03013   0.04816   0.06444
     Eigenvalues ---    0.06448   0.07344   0.07362   0.11390   0.11480
     Eigenvalues ---    0.13899   0.13928   0.15663   0.15749   0.15998
     Eigenvalues ---    0.15998   0.15999   0.15999   0.15999   0.16000
     Eigenvalues ---    0.16000   0.16000   0.16000   0.16000   0.16000
     Eigenvalues ---    0.16000   0.16000   0.16000   0.16001   0.16004
     Eigenvalues ---    0.16007   0.16085   0.21931   0.21996   0.22000
     Eigenvalues ---    0.22000   0.22000   0.22003   0.22004   0.22009
     Eigenvalues ---    0.22016   0.22273   0.22935   0.23019   0.23472
     Eigenvalues ---    0.23479   0.23875   0.23989   0.24569   0.24690
     Eigenvalues ---    0.24981   0.24994   0.24999   0.25000   0.25000
     Eigenvalues ---    0.25052   0.25095   0.31157   0.31289   0.31497
     Eigenvalues ---    0.33163   0.35063   0.35131   0.35279   0.35348
     Eigenvalues ---    0.35360   0.35661   0.36388   0.36393   0.36413
     Eigenvalues ---    0.36467   0.36504   0.36509   0.36516   0.36518
     Eigenvalues ---    0.36520   0.36570   0.36630   0.36651   0.36689
     Eigenvalues ---    0.36713   0.36751   0.36825   0.36859   0.36929
     Eigenvalues ---    0.37177   0.38940   0.42410   0.42835   0.43155
     Eigenvalues ---    0.43395   0.43398   0.43445   0.43487   0.43492
     Eigenvalues ---    0.44540   0.45964   0.46694   0.46972   0.47299
     Eigenvalues ---    0.47343   0.47515   0.47754   0.47829   0.47894
     Eigenvalues ---    0.48006   0.48162   0.48173   0.48502   0.48582
     Eigenvalues ---    0.49167   0.49747   0.51866   0.55939   0.56293
     Eigenvalues ---    0.59636   0.980521000.000001000.000001000.00000
     Eigenvalues --- 1000.000001000.000001000.000001000.000001000.00000
     Eigenvalues --- 1000.000001000.000001000.000001000.000001000.00000
     Eigenvalues --- 1000.000001000.000001000.000001000.000001000.00000
     Eigenvalues --- 1000.000001000.000001000.000001000.000001000.00000
     Eigenvalues --- 1000.000001000.000001000.000001000.000001000.00000
     Eigenvalues --- 1000.000001000.000001000.000001000.000001000.00000
     Eigenvalues --- 1000.000001000.000001000.000001000.000001000.00000
     Eigenvalues --- 1000.000001000.000001000.000001000.000001000.00000
     Eigenvalues --- 1000.000001000.000001000.000001000.000001000.00000
     Eigenvalues --- 1000.000001000.000001000.000001000.000001000.00000
     Eigenvalues --- 1000.000001000.000001000.000001000.000001000.00000
     Eigenvalues --- 1000.000001000.000001000.000001000.000001000.00000
     Eigenvalues --- 1000.000001000.000001000.000001000.000001000.00000
     Eigenvalues --- 1000.000001000.000001000.000001000.000001000.00000
     Eigenvalues --- 1000.000001000.000001000.000001000.000001000.00000
     Eigenvalues --- 1000.000001000.000001000.000001000.000001000.00000
     Eigenvalues --- 1000.000001000.000001000.000001000.000001000.00000
     Eigenvalues --- 1000.000001000.000001000.000001000.000001000.00000
     Eigenvalues --- 1000.000001000.000001000.000001000.000001000.00000
     Eigenvalues --- 1000.000001000.000001000.000001000.000001000.00000
     Eigenvalues --- 1000.000001000.000001000.000001000.000001000.00000
     Eigenvalues --- 1000.000001000.000001000.000001000.000001000.00000
     Eigenvalues --- 1000.000001000.000001000.000001000.000001000.00000
     Eigenvalues --- 1000.000001000.000001000.000001000.000001000.00000
     Eigenvalues --- 1000.000001000.000001000.00000
 RFO step:  Lambda=-4.56950847D-06.
 Quartic linear search produced a step of  0.13468.
 Iteration  1 RMS(Cart)=  0.00894706 RMS(Int)=  0.00002179
 Iteration  2 RMS(Cart)=  0.00005314 RMS(Int)=  0.00000009
 Iteration  3 RMS(Cart)=  0.00000000 RMS(Int)=  0.00000009
 Variable       Old X    -DE/DX   Delta X   Delta X   Delta X     New X
                                 (Linear)    (Quad)   (Total)
    R1        2.61262   0.00004   0.00003   0.00006   0.00009   2.61270
    R2        2.66992   0.00003   0.00002   0.00002   0.00005   2.66996
    R3        2.05107   0.00002   0.00001   0.00002   0.00002   2.05110
    R4        2.65839   0.00009   0.00003   0.00016   0.00018   2.65857
    R5        2.05005   0.00004   0.00000   0.00007   0.00007   2.05012
    R6        2.64547   0.00007   0.00000   0.00011   0.00011   2.64557
    R7        2.57245  -0.00019  -0.00008  -0.00047  -0.00055   2.57190
    R8        2.63375   0.00015   0.00003   0.00027   0.00029   2.63404
    R9        2.04652   0.00002   0.00002   0.00001   0.00003   2.04655
   R10        2.65397  -0.00011   0.00002  -0.00024  -0.00022   2.65375
   R11        2.05341   0.00003   0.00001   0.00004   0.00005   2.05346
   R12        2.75293   0.00017   0.00004   0.00048   0.00051   2.75344
   R13        2.70351  -0.00021   0.00004  -0.00034  -0.00030   2.70322
   R14        2.55038  -0.00007   0.00002  -0.00015  -0.00013   2.55025
   R15        2.05826   0.00002   0.00001   0.00001   0.00002   2.05828
   R16        2.80023   0.00019   0.00004   0.00043   0.00046   2.80069
   R17        2.04872   0.00007  -0.00004   0.00007   0.00004   2.04876
   R18        2.82821   0.00005   0.00013   0.00022   0.00035   2.82856
   R19        2.32977  -0.00048   0.00002  -0.00043  -0.00041   2.32936
   R20        2.64934  -0.00001   0.00005   0.00001   0.00005   2.64939
   R21        2.65932  -0.00003   0.00010  -0.00004   0.00006   2.65939
   R22        2.62847   0.00007   0.00000   0.00006   0.00006   2.62854
   R23        2.04960   0.00005   0.00001   0.00008   0.00009   2.04969
   R24        2.65103   0.00013  -0.00002   0.00019   0.00018   2.65120
   R25        2.04696   0.00003   0.00002   0.00003   0.00006   2.04701
   R26        2.65194   0.00009   0.00001   0.00014   0.00014   2.65208
   R27        2.57311  -0.00022  -0.00007  -0.00048  -0.00055   2.57255
   R28        2.62088   0.00003   0.00003   0.00004   0.00007   2.62095
   R29        2.04993   0.00004   0.00000   0.00005   0.00005   2.04998
   R30        2.04919   0.00007  -0.00005   0.00008   0.00003   2.04922
   R31        2.70325  -0.00022   0.00003  -0.00038  -0.00035   2.70290
   R32        2.85072   0.00009  -0.00001   0.00021   0.00019   2.85092
   R33        2.07915   0.00002  -0.00003  -0.00007  -0.00010   2.07904
   R34        2.07483   0.00005  -0.00002   0.00002   0.00000   2.07484
   R35        2.64656   0.00003   0.00002   0.00002   0.00004   2.64660
   R36        2.64207   0.00001   0.00003   0.00001   0.00003   2.64211
   R37        2.63357   0.00004   0.00002   0.00006   0.00009   2.63366
   R38        2.05082   0.00004   0.00001   0.00007   0.00008   2.05090
   R39        2.63985   0.00006   0.00002   0.00007   0.00009   2.63994
   R40        2.05245   0.00004   0.00000   0.00005   0.00005   2.05250
   R41        2.63537   0.00004   0.00004   0.00008   0.00012   2.63550
   R42        2.05220   0.00003   0.00000   0.00004   0.00004   2.05224
   R43        2.63796   0.00007   0.00002   0.00009   0.00011   2.63806
   R44        2.05222   0.00003   0.00000   0.00004   0.00004   2.05227
   R45        2.05450   0.00004   0.00001   0.00005   0.00005   2.05456
   R46        2.85116   0.00010  -0.00001   0.00024   0.00022   2.85138
   R47        2.07892   0.00003  -0.00002  -0.00004  -0.00006   2.07886
   R48        2.07461   0.00005  -0.00002   0.00002   0.00000   2.07461
   R49        2.64208   0.00003   0.00003   0.00005   0.00008   2.64216
   R50        2.64650   0.00002   0.00002  -0.00001   0.00001   2.64651
   R51        2.63796   0.00006   0.00001   0.00006   0.00007   2.63803
   R52        2.05450   0.00004   0.00001   0.00006   0.00007   2.05458
   R53        2.63539   0.00005   0.00004   0.00010   0.00014   2.63553
   R54        2.05227   0.00003   0.00000   0.00004   0.00004   2.05231
   R55        2.63984   0.00005   0.00002   0.00004   0.00006   2.63990
   R56        2.05225   0.00003   0.00000   0.00004   0.00004   2.05229
   R57        2.63366   0.00005   0.00003   0.00009   0.00012   2.63377
   R58        2.05250   0.00004   0.00000   0.00005   0.00005   2.05255
   R59        2.05073   0.00004   0.00000   0.00004   0.00004   2.05078
    A1        2.11735   0.00001  -0.00001   0.00001   0.00000   2.11735
    A2        2.07401  -0.00003  -0.00002  -0.00019  -0.00021   2.07381
    A3        2.09182   0.00002   0.00003   0.00018   0.00020   2.09202
    A4        2.10015   0.00001  -0.00002   0.00003   0.00001   2.10016
    A5        2.11790  -0.00001   0.00000  -0.00005  -0.00005   2.11784
    A6        2.06514   0.00000   0.00002   0.00003   0.00004   2.06518
    A7        2.08643  -0.00006   0.00003  -0.00019  -0.00016   2.08627
    A8        2.01598  -0.00001   0.00007  -0.00004   0.00003   2.01601
    A9        2.18077   0.00007  -0.00009   0.00023   0.00013   2.18090
   A10        2.08309   0.00003  -0.00001   0.00017   0.00016   2.08325
   A11        2.11534   0.00001   0.00000   0.00011   0.00010   2.11544
   A12        2.08476  -0.00005   0.00001  -0.00028  -0.00027   2.08450
   A13        2.13176  -0.00003  -0.00001  -0.00015  -0.00016   2.13160
   A14        2.07637  -0.00001   0.00001  -0.00007  -0.00005   2.07631
   A15        2.07505   0.00004   0.00000   0.00022   0.00022   2.07527
   A16        2.04759   0.00004   0.00002   0.00013   0.00015   2.04774
   A17        2.15930  -0.00002   0.00002   0.00004   0.00006   2.15936
   A18        2.07630  -0.00003  -0.00004  -0.00017  -0.00022   2.07608
   A19        2.07023   0.00018  -0.00013   0.00062   0.00049   2.07072
   A20        2.23997  -0.00007  -0.00002  -0.00033  -0.00036   2.23961
   A21        2.02675  -0.00007  -0.00001  -0.00045  -0.00047   2.02629
   A22        2.01646   0.00014   0.00003   0.00079   0.00082   2.01729
   A23        2.09421  -0.00002  -0.00005  -0.00016  -0.00021   2.09400
   A24        2.11250   0.00001  -0.00017  -0.00031  -0.00047   2.11203
   A25        2.07630   0.00002   0.00021   0.00048   0.00070   2.07700
   A26        2.08073  -0.00023   0.00035  -0.00036  -0.00001   2.08072
   A27        2.11164   0.00009  -0.00020   0.00005  -0.00016   2.11148
   A28        2.09077   0.00014  -0.00014   0.00032   0.00017   2.09094
   A29        2.05414   0.00000  -0.00020  -0.00025  -0.00045   2.05369
   A30        2.17046  -0.00005   0.00030   0.00030   0.00060   2.17106
   A31        2.05845   0.00004  -0.00009  -0.00004  -0.00013   2.05832
   A32        2.12525  -0.00003   0.00005  -0.00005   0.00000   2.12525
   A33        2.05482   0.00005  -0.00006   0.00012   0.00007   2.05489
   A34        2.10312  -0.00002   0.00000  -0.00007  -0.00007   2.10305
   A35        2.08419   0.00003   0.00000   0.00016   0.00016   2.08435
   A36        2.08559  -0.00004   0.00000  -0.00029  -0.00028   2.08531
   A37        2.11340   0.00001   0.00000   0.00013   0.00012   2.11352
   A38        2.08820  -0.00007   0.00002  -0.00022  -0.00020   2.08800
   A39        2.17735   0.00006  -0.00012   0.00013   0.00000   2.17735
   A40        2.01763   0.00001   0.00010   0.00009   0.00019   2.01783
   A41        2.09735   0.00001  -0.00003   0.00003   0.00000   2.09735
   A42        2.06734   0.00002   0.00001   0.00016   0.00017   2.06751
   A43        2.11849  -0.00003   0.00001  -0.00018  -0.00017   2.11832
   A44        2.11288   0.00002   0.00005   0.00012   0.00017   2.11304
   A45        2.10609   0.00002   0.00015   0.00040   0.00055   2.10664
   A46        2.06400  -0.00003  -0.00019  -0.00050  -0.00070   2.06331
   A47        2.07098   0.00022  -0.00018   0.00068   0.00050   2.07149
   A48        1.90103   0.00000  -0.00007  -0.00014  -0.00021   1.90082
   A49        1.90367   0.00004   0.00000   0.00030   0.00029   1.90397
   A50        1.92252   0.00001  -0.00001   0.00002   0.00001   1.92253
   A51        1.92964  -0.00006  -0.00003  -0.00046  -0.00049   1.92915
   A52        1.92851  -0.00001   0.00004  -0.00001   0.00003   1.92854
   A53        1.87836   0.00002   0.00007   0.00030   0.00037   1.87873
   A54        2.10607  -0.00002   0.00001  -0.00004  -0.00003   2.10604
   A55        2.09730   0.00001  -0.00002   0.00001  -0.00001   2.09729
   A56        2.07917   0.00001   0.00000   0.00003   0.00003   2.07920
   A57        2.10040   0.00000   0.00000   0.00002   0.00002   2.10042
   A58        2.08261   0.00001   0.00002   0.00012   0.00013   2.08274
   A59        2.10008  -0.00002  -0.00002  -0.00013  -0.00015   2.09992
   A60        2.09848   0.00000   0.00000   0.00000  -0.00001   2.09848
   A61        2.08984   0.00000  -0.00001  -0.00005  -0.00006   2.08978
   A62        2.09486   0.00001   0.00001   0.00005   0.00006   2.09493
   A63        2.08932  -0.00001  -0.00001  -0.00004  -0.00004   2.08928
   A64        2.09679   0.00000   0.00000   0.00002   0.00002   2.09681
   A65        2.09707   0.00001   0.00000   0.00002   0.00002   2.09709
   A66        2.09462   0.00000   0.00001   0.00004   0.00004   2.09466
   A67        2.09762   0.00000   0.00000   0.00001   0.00001   2.09763
   A68        2.09090  -0.00001   0.00000  -0.00005  -0.00005   2.09085
   A69        2.10432  -0.00001  -0.00001  -0.00004  -0.00004   2.10428
   A70        2.08863   0.00002   0.00002   0.00012   0.00013   2.08876
   A71        2.09024  -0.00001  -0.00001  -0.00008  -0.00008   2.09015
   A72        1.90084   0.00001  -0.00006  -0.00004  -0.00010   1.90074
   A73        1.90417   0.00004  -0.00002   0.00025   0.00023   1.90440
   A74        1.92360   0.00001   0.00000   0.00001   0.00002   1.92362
   A75        1.92929  -0.00005   0.00000  -0.00035  -0.00034   1.92895
   A76        1.92771  -0.00002   0.00001  -0.00012  -0.00011   1.92760
   A77        1.87815   0.00002   0.00007   0.00025   0.00032   1.87847
   A78        2.09697  -0.00004  -0.00005  -0.00025  -0.00030   2.09667
   A79        2.10644   0.00003   0.00004   0.00023   0.00027   2.10671
   A80        2.07911   0.00001   0.00001   0.00001   0.00002   2.07913
   A81        2.10441   0.00000  -0.00001  -0.00002  -0.00003   2.10438
   A82        2.08825   0.00002   0.00002   0.00016   0.00018   2.08842
   A83        2.09053  -0.00002  -0.00001  -0.00014  -0.00015   2.09038
   A84        2.09459   0.00001   0.00001   0.00005   0.00005   2.09464
   A85        2.09096  -0.00001   0.00000  -0.00005  -0.00006   2.09090
   A86        2.09760   0.00000   0.00000   0.00001   0.00000   2.09760
   A87        2.08928  -0.00001  -0.00001  -0.00007  -0.00008   2.08921
   A88        2.09706   0.00001   0.00000   0.00004   0.00004   2.09710
   A89        2.09684   0.00001   0.00000   0.00003   0.00003   2.09687
   A90        2.09853   0.00000   0.00000   0.00003   0.00003   2.09856
   A91        2.09479   0.00000   0.00001   0.00003   0.00004   2.09483
   A92        2.08987  -0.00001  -0.00001  -0.00006  -0.00008   2.08979
   A93        2.10040   0.00000   0.00000   0.00000   0.00000   2.10040
   A94        2.08219   0.00001   0.00000   0.00008   0.00008   2.08227
   A95        2.10050  -0.00001   0.00000  -0.00008  -0.00008   2.10041
    D1       -0.00055   0.00001  -0.00001   0.00022   0.00022  -0.00033
    D2        3.14045   0.00000  -0.00002   0.00003   0.00000   3.14045
    D3       -3.13875   0.00000  -0.00001   0.00004   0.00003  -3.13872
    D4        0.00225   0.00000  -0.00002  -0.00016  -0.00018   0.00206
    D5        0.00039   0.00000   0.00008   0.00036   0.00043   0.00083
    D6       -3.13968   0.00001   0.00014   0.00054   0.00068  -3.13900
    D7        3.13856   0.00001   0.00008   0.00054   0.00062   3.13918
    D8       -0.00152   0.00001   0.00014   0.00073   0.00087  -0.00065
    D9       -0.00116  -0.00001  -0.00008  -0.00075  -0.00083  -0.00199
   D10       -3.13977  -0.00001  -0.00013  -0.00062  -0.00075  -3.14052
   D11        3.14101  -0.00001  -0.00007  -0.00056  -0.00062   3.14039
   D12        0.00240   0.00000  -0.00011  -0.00043  -0.00054   0.00186
   D13        0.00297   0.00001   0.00011   0.00067   0.00078   0.00375
   D14       -3.13746   0.00002   0.00006   0.00095   0.00100  -3.13645
   D15        3.14128   0.00001   0.00015   0.00054   0.00069  -3.14121
   D16        0.00085   0.00001   0.00011   0.00081   0.00092   0.00177
   D17       -3.11331   0.00001  -0.00011   0.00018   0.00007  -3.11324
   D18        0.03144   0.00001  -0.00016   0.00032   0.00016   0.03160
   D19       -0.00320   0.00000  -0.00004  -0.00008  -0.00012  -0.00332
   D20        3.13977   0.00000  -0.00005  -0.00003  -0.00008   3.13969
   D21        3.13725  -0.00001   0.00001  -0.00035  -0.00034   3.13691
   D22       -0.00296  -0.00001  -0.00001  -0.00030  -0.00030  -0.00327
   D23        0.00150  -0.00001  -0.00005  -0.00043  -0.00048   0.00102
   D24       -3.14153  -0.00001  -0.00012  -0.00060  -0.00072   3.14093
   D25       -3.14147  -0.00001  -0.00004  -0.00048  -0.00052   3.14120
   D26       -0.00131  -0.00001  -0.00010  -0.00066  -0.00076  -0.00207
   D27       -0.02913   0.00000   0.00025   0.00097   0.00122  -0.02791
   D28        3.11222   0.00000   0.00010   0.00072   0.00082   3.11304
   D29        3.11400   0.00001   0.00031   0.00116   0.00147   3.11547
   D30       -0.02783   0.00000   0.00017   0.00091   0.00107  -0.02676
   D31        3.09033  -0.00003  -0.00049  -0.00241  -0.00290   3.08743
   D32        0.98280   0.00001  -0.00041  -0.00194  -0.00235   0.98044
   D33       -1.07513  -0.00004  -0.00050  -0.00249  -0.00299  -1.07811
   D34        3.12798   0.00000  -0.00021  -0.00007  -0.00029   3.12770
   D35        0.00634  -0.00001  -0.00019  -0.00100  -0.00118   0.00516
   D36       -0.01337   0.00000  -0.00007   0.00018   0.00011  -0.01326
   D37       -3.13501  -0.00001  -0.00004  -0.00075  -0.00079  -3.13580
   D38        3.07680   0.00000   0.00053   0.00321   0.00374   3.08054
   D39       -0.07610   0.00002   0.00076   0.00355   0.00430  -0.07180
   D40       -0.08433   0.00002   0.00050   0.00411   0.00461  -0.07972
   D41        3.04595   0.00004   0.00073   0.00444   0.00517   3.05112
   D42        2.97153   0.00005   0.00119   0.00841   0.00960   2.98113
   D43       -0.18800   0.00006   0.00127   0.00949   0.01076  -0.17724
   D44       -0.15889   0.00003   0.00096   0.00809   0.00905  -0.14984
   D45        2.96476   0.00004   0.00104   0.00916   0.01021   2.97497
   D46        3.13484   0.00000   0.00014   0.00049   0.00063   3.13548
   D47       -0.00649   0.00000  -0.00001   0.00019   0.00017  -0.00631
   D48        0.01002  -0.00001   0.00006  -0.00052  -0.00046   0.00956
   D49       -3.13132  -0.00001  -0.00009  -0.00082  -0.00092  -3.13223
   D50       -3.12573  -0.00001  -0.00017  -0.00083  -0.00099  -3.12672
   D51       -0.00695   0.00001   0.00001   0.00019   0.00021  -0.00674
   D52       -0.00212   0.00000  -0.00009   0.00025   0.00016  -0.00195
   D53        3.11666   0.00002   0.00009   0.00127   0.00136   3.11803
   D54       -0.01018   0.00000  -0.00001   0.00021   0.00020  -0.00998
   D55        3.13024   0.00000   0.00002   0.00011   0.00014   3.13037
   D56        3.13115   0.00001   0.00015   0.00052   0.00067   3.13182
   D57       -0.01162   0.00000   0.00018   0.00043   0.00061  -0.01102
   D58        0.00233   0.00001  -0.00002   0.00037   0.00036   0.00269
   D59       -3.14122   0.00000   0.00008  -0.00011  -0.00003  -3.14124
   D60       -3.13806   0.00001  -0.00005   0.00047   0.00042  -3.13764
   D61        0.00157   0.00000   0.00005  -0.00001   0.00004   0.00161
   D62        0.00534  -0.00001  -0.00001  -0.00063  -0.00064   0.00470
   D63       -3.13369  -0.00001  -0.00006  -0.00077  -0.00084  -3.13453
   D64       -3.13447   0.00000  -0.00010  -0.00019  -0.00029  -3.13476
   D65        0.00968   0.00000  -0.00016  -0.00034  -0.00049   0.00919
   D66        0.04111   0.00001  -0.00006   0.00069   0.00063   0.04174
   D67       -3.10236   0.00000   0.00004   0.00022   0.00026  -3.10210
   D68       -0.00544   0.00001   0.00007   0.00031   0.00038  -0.00506
   D69       -3.12476  -0.00001  -0.00012  -0.00069  -0.00081  -3.12556
   D70        3.13352   0.00001   0.00012   0.00046   0.00058   3.13410
   D71        0.01420  -0.00001  -0.00006  -0.00054  -0.00060   0.01360
   D72        3.08657  -0.00002  -0.00042  -0.00190  -0.00231   3.08426
   D73        0.97928   0.00001  -0.00037  -0.00160  -0.00197   0.97731
   D74       -1.07932  -0.00004  -0.00044  -0.00207  -0.00251  -1.08183
   D75       -0.77229  -0.00001   0.00005  -0.00040  -0.00035  -0.77264
   D76        2.40823  -0.00001   0.00010  -0.00020  -0.00011   2.40812
   D77        1.31922   0.00001  -0.00001  -0.00040  -0.00042   1.31880
   D78       -1.78344   0.00001   0.00003  -0.00021  -0.00018  -1.78362
   D79       -2.88636  -0.00001   0.00009  -0.00033  -0.00025  -2.88661
   D80        0.29416  -0.00001   0.00013  -0.00014  -0.00001   0.29416
   D81       -3.10292   0.00000   0.00008   0.00028   0.00036  -3.10256
   D82        0.05379   0.00000   0.00006   0.00027   0.00033   0.05412
   D83        0.00014   0.00000   0.00003   0.00009   0.00012   0.00026
   D84       -3.12633   0.00000   0.00001   0.00008   0.00009  -3.12624
   D85        3.09446   0.00000  -0.00009  -0.00036  -0.00045   3.09401
   D86       -0.05037   0.00000  -0.00004  -0.00016  -0.00020  -0.05057
   D87       -0.00880   0.00000  -0.00005  -0.00016  -0.00021  -0.00901
   D88        3.12955   0.00000   0.00000   0.00003   0.00004   3.12959
   D89        0.00772   0.00000  -0.00001   0.00001   0.00000   0.00773
   D90       -3.13561   0.00000  -0.00002  -0.00003  -0.00004  -3.13565
   D91        3.13405   0.00000   0.00001   0.00002   0.00003   3.13408
   D92       -0.00928   0.00000   0.00000  -0.00001  -0.00001  -0.00929
   D93       -0.00695   0.00000  -0.00001  -0.00003  -0.00003  -0.00699
   D94        3.13935   0.00000   0.00000   0.00001   0.00000   3.13936
   D95        3.13638   0.00000   0.00000   0.00001   0.00001   3.13639
   D96       -0.00049   0.00000   0.00001   0.00004   0.00005  -0.00045
   D97       -0.00166   0.00000  -0.00001  -0.00005  -0.00005  -0.00172
   D98       -3.13302   0.00000   0.00000   0.00003   0.00002  -3.13299
   D99        3.13521   0.00000  -0.00001  -0.00008  -0.00009   3.13512
   D100       0.00386   0.00000   0.00000  -0.00001  -0.00001   0.00385
   D101       0.00960   0.00000   0.00003   0.00014   0.00018   0.00978
   D102      -3.12875   0.00000  -0.00001  -0.00005  -0.00007  -3.12882
   D103       3.14099   0.00000   0.00003   0.00007   0.00010   3.14109
   D104       0.00264   0.00000  -0.00002  -0.00012  -0.00015   0.00250
   D105       2.41862   0.00001   0.00053   0.00383   0.00436   2.42298
   D106      -0.76233   0.00001   0.00049   0.00348   0.00397  -0.75836
   D107      -1.77276   0.00003   0.00046   0.00391   0.00437  -1.76840
   D108       1.32947   0.00003   0.00042   0.00355   0.00398   1.33344
   D109       0.30385   0.00001   0.00056   0.00392   0.00447   0.30832
   D110      -2.87711   0.00001   0.00052   0.00357   0.00408  -2.87302
   D111       3.09400  -0.00001  -0.00009  -0.00051  -0.00060   3.09340
   D112      -0.05035  -0.00001  -0.00007  -0.00047  -0.00053  -0.05089
   D113      -0.00885   0.00000  -0.00006  -0.00017  -0.00023  -0.00907
   D114       3.12999   0.00000  -0.00003  -0.00012  -0.00015   3.12983
   D115      -3.10252   0.00001   0.00007   0.00045   0.00052  -3.10200
   D116       0.05416   0.00001   0.00006   0.00047   0.00053   0.05470
   D117       0.00010   0.00000   0.00003   0.00009   0.00013   0.00023
   D118      -3.12639   0.00000   0.00003   0.00011   0.00014  -3.12625
   D119       0.00983   0.00000   0.00004   0.00012   0.00016   0.00999
   D120       3.14099   0.00000   0.00003   0.00007   0.00010   3.14109
   D121      -3.12900   0.00000   0.00002   0.00008   0.00009  -3.12891
   D122       0.00216   0.00000   0.00000   0.00002   0.00003   0.00219
   D123      -0.00198   0.00000   0.00000   0.00000   0.00000  -0.00198
   D124       3.13500   0.00000  -0.00002  -0.00011  -0.00013   3.13487
   D125      -3.13311   0.00000   0.00001   0.00005   0.00006  -3.13304
   D126       0.00388   0.00000  -0.00001  -0.00005  -0.00006   0.00381
   D127      -0.00672   0.00000  -0.00002  -0.00008  -0.00010  -0.00682
   D128       3.13661   0.00000  -0.00002  -0.00010  -0.00011   3.13650
   D129       3.13948   0.00000   0.00000   0.00003   0.00003   3.13951
   D130      -0.00037   0.00000   0.00000   0.00001   0.00001  -0.00036
   D131       0.00767   0.00000   0.00000   0.00003   0.00003   0.00770
   D132       3.13401   0.00000   0.00001   0.00001   0.00002   3.13403
   D133      -3.13566   0.00000   0.00000   0.00005   0.00005  -3.13561
   D134      -0.00932   0.00000   0.00001   0.00003   0.00004  -0.00928
         Item               Value     Threshold  Converged?
 Maximum Force            0.000478     0.000450     NO 
 RMS     Force            0.000056     0.000300     YES
 Maximum Displacement     0.040832     0.001800     NO 
 RMS     Displacement     0.008951     0.001200     NO 
 Predicted change in Energy=-2.501310D-06
 GradGradGradGradGradGradGradGradGradGradGradGradGradGradGradGradGradGrad

 Stoichiometry    C29H24O3
 Framework group  C1[X(C29H24O3)]
 Deg. of freedom   162
 Full point group                 C1      NOp   1
 Largest Abelian subgroup         C1      NOp   1
 Largest concise Abelian subgroup C1      NOp   1
                         Standard orientation:                         
 ---------------------------------------------------------------------
 Center     Atomic     Atomic              Coordinates (Angstroms)
 Number     Number      Type              X           Y           Z
 ---------------------------------------------------------------------
    1          6             0        2.780611   -0.161309    0.064522
    2          6             0        4.059326   -0.687066    0.064691
    3          6             0        5.175737    0.159917   -0.059750
    4          6             0        4.983603    1.540851   -0.186410
    5          6             0        3.687528    2.053747   -0.182476
    6          6             0        2.558053    1.228462   -0.058957
    7          8             0        6.386709   -0.461160   -0.049164
    8          6             0        1.234920    1.838650   -0.062268
    9          6             0        0.032754    1.230450    0.016046
   10          6             0       -1.208425    2.040376    0.014216
   11          6             0       -2.534199    1.345610    0.022072
   12          6             0       -3.679266    2.130350    0.218541
   13          6             0       -4.954208    1.574421    0.234143
   14          6             0       -5.106568    0.193778    0.036915
   15          6             0       -3.972697   -0.606955   -0.169842
   16          6             0       -2.708226   -0.037107   -0.173530
   17          8             0       -6.299399   -0.462234    0.030528
   18          6             0        7.568840    0.339642   -0.136076
   19          6             0        8.776518   -0.558135   -0.028804
   20          6             0        8.828133   -1.574063    0.933838
   21          6             0        9.965813   -2.369449    1.057794
   22          6             0       11.068812   -2.153627    0.228090
   23          6             0       11.024201   -1.143070   -0.732024
   24          6             0        9.880218   -0.353683   -0.862382
   25          8             0       -1.162245    3.272150    0.017706
   26          6             0       -7.501450    0.297149    0.186112
   27          6             0       -8.685036   -0.630945    0.065697
   28          6             0       -9.778989   -0.488324    0.924655
   29          6             0      -10.902942   -1.304321    0.784441
   30          6             0      -10.936705   -2.280185   -0.211369
   31          6             0       -9.843137   -2.434283   -1.066883
   32          6             0       -8.725754   -1.612111   -0.932790
   33          1             0        1.937070   -0.836946    0.164697
   34          1             0        4.230782   -1.754013    0.160525
   35          1             0        5.823267    2.217152   -0.288599
   36          1             0        3.545929    3.126760   -0.279391
   37          1             0        1.208443    2.924968   -0.136838
   38          1             0       -0.043345    0.152120    0.098543
   39          1             0       -3.542090    3.196937    0.360113
   40          1             0       -5.812666    2.214044    0.399441
   41          1             0       -4.113003   -1.671112   -0.326961
   42          1             0       -1.855349   -0.682794   -0.351318
   43          1             0        7.563652    1.078491    0.679078
   44          1             0        7.583035    0.891388   -1.085225
   45          1             0        7.967845   -1.745059    1.572993
   46          1             0        9.993034   -3.158161    1.804045
   47          1             0       11.955330   -2.772992    0.327416
   48          1             0       11.874170   -0.973749   -1.386476
   49          1             0        9.845480    0.425108   -1.620232
   50          1             0       -7.539930    1.074100   -0.591741
   51          1             0       -7.507699    0.802051    1.160937
   52          1             0       -9.752074    0.263219    1.709854
   53          1             0      -11.745484   -1.183048    1.458894
   54          1             0      -11.807377   -2.920419   -0.318502
   55          1             0       -9.861903   -3.195765   -1.841186
   56          1             0       -7.872419   -1.734947   -1.591911
 ---------------------------------------------------------------------
 Rotational constants (GHZ):      0.4694354      0.0244278      0.0234603
 Standard basis: 6-31G(d,p) (6D, 7F)
 There are   600 symmetry adapted basis functions of A   symmetry.
 Integral buffers will be    262144 words long.
 Raffenetti 2 integral format.
 Two-electron integral symmetry is turned on.
   600 basis functions,  1064 primitive gaussians,   600 cartesian basis functions
   111 alpha electrons      111 beta electrons
       nuclear repulsion energy      2501.1102758490 Hartrees.
 NAtoms=   56 NActive=   56 NUniq=   56 SFac= 1.00D+00 NAtFMM=   60 Big=F
 One-electron integrals computed using PRISM.
 NBasis=   600 RedAO= T  NBF=   600
 NBsUse=   600 1.00D-06 NBFU=   600
 Initial guess read from the read-write file:
 Initial guess orbital symmetries:
       Occupied  (A) (A) (A) (A) (A) (A) (A) (A) (A) (A) (A) (A)
                 (A) (A) (A) (A) (A) (A) (A) (A) (A) (A) (A) (A)
                 (A) (A) (A) (A) (A) (A) (A) (A) (A) (A) (A) (A)
                 (A) (A) (A) (A) (A) (A) (A) (A) (A) (A) (A) (A)
                 (A) (A) (A) (A) (A) (A) (A) (A) (A) (A) (A) (A)
                 (A) (A) (A) (A) (A) (A) (A) (A) (A) (A) (A) (A)
                 (A) (A) (A) (A) (A) (A) (A) (A) (A) (A) (A) (A)
                 (A) (A) (A) (A) (A) (A) (A) (A) (A) (A) (A) (A)
                 (A) (A) (A) (A) (A) (A) (A) (A) (A) (A) (A) (A)
                 (A) (A) (A)
       Virtual   (A) (A) (A) (A) (A) (A) (A) (A) (A) (A) (A) (A)
                 (A) (A) (A) (A) (A) (A) (A) (A) (A) (A) (A) (A)
                 (A) (A) (A) (A) (A) (A) (A) (A) (A) (A) (A) (A)
                 (A) (A) (A) (A) (A) (A) (A) (A) (A) (A) (A) (A)
                 (A) (A) (A) (A) (A) (A) (A) (A) (A) (A) (A) (A)
                 (A) (A) (A) (A) (A) (A) (A) (A) (A) (A) (A) (A)
                 (A) (A) (A) (A) (A) (A) (A) (A) (A) (A) (A) (A)
                 (A) (A) (A) (A) (A) (A) (A) (A) (A) (A) (A) (A)
                 (A) (A) (A) (A) (A) (A) (A) (A) (A) (A) (A) (A)
                 (A) (A) (A) (A) (A) (A) (A) (A) (A) (A) (A) (A)
                 (A) (A) (A) (A) (A) (A) (A) (A) (A) (A) (A) (A)
                 (A) (A) (A) (A) (A) (A) (A) (A) (A) (A) (A) (A)
                 (A) (A) (A) (A) (A) (A) (A) (A) (A) (A) (A) (A)
                 (A) (A) (A) (A) (A) (A) (A) (A) (A) (A) (A) (A)
                 (A) (A) (A) (A) (A) (A) (A) (A) (A) (A) (A) (A)
                 (A) (A) (A) (A) (A) (A) (A) (A) (A) (A) (A) (A)
                 (A) (A) (A) (A) (A) (A) (A) (A) (A) (A) (A) (A)
                 (A) (A) (A) (A) (A) (A) (A) (A) (A) (A) (A) (A)
                 (A) (A) (A) (A) (A) (A) (A) (A) (A) (A) (A) (A)
                 (A) (A) (A) (A) (A) (A) (A) (A) (A) (A) (A) (A)
                 (A) (A) (A) (A) (A) (A) (A) (A) (A) (A) (A) (A)
                 (A) (A) (A) (A) (A) (A) (A) (A) (A) (A) (A) (A)
                 (A) (A) (A) (A) (A) (A) (A) (A) (A) (A) (A) (A)
                 (A) (A) (A) (A) (A) (A) (A) (A) (A) (A) (A) (A)
                 (A) (A) (A) (A) (A) (A) (A) (A) (A) (A) (A) (A)
                 (A) (A) (A) (A) (A) (A) (A) (A) (A) (A) (A) (A)
                 (A) (A) (A) (A) (A) (A) (A) (A) (A) (A) (A) (A)
                 (A) (A) (A) (A) (A) (A) (A) (A) (A) (A) (A) (A)
                 (A) (A) (A) (A) (A) (A) (A) (A) (A) (A) (A) (A)
                 (A) (A) (A) (A) (A) (A) (A) (A) (A) (A) (A) (A)
                 (A) (A) (A) (A) (A) (A) (A) (A) (A) (A) (A) (A)
                 (A) (A) (A) (A) (A) (A) (A) (A) (A) (A) (A) (A)
                 (A) (A) (A) (A) (A) (A) (A) (A) (A) (A) (A) (A)
                 (A) (A) (A) (A) (A) (A) (A) (A) (A) (A) (A) (A)
                 (A) (A) (A) (A) (A) (A) (A) (A) (A) (A) (A) (A)
                 (A) (A) (A) (A) (A) (A) (A) (A) (A) (A) (A) (A)
                 (A) (A) (A) (A) (A) (A) (A) (A) (A) (A) (A) (A)
                 (A) (A) (A) (A) (A) (A) (A) (A) (A) (A) (A) (A)
                 (A) (A) (A) (A) (A) (A) (A) (A) (A) (A) (A) (A)
                 (A) (A) (A) (A) (A) (A) (A) (A) (A) (A) (A) (A)
                 (A) (A) (A) (A) (A) (A) (A) (A) (A)
 Harris functional with IExCor=  402 diagonalized for initial guess.
 ExpMin= 1.61D-01 ExpMax= 5.48D+03 ExpMxC= 8.25D+02 IAcc=1 IRadAn=         1 AccDes= 1.00D-06
 HarFok:  IExCor= 402 AccDes= 1.00D-06 IRadAn=         1 IDoV=1
 ScaDFX=  1.000000  1.000000  1.000000  1.000000
 Requested convergence on RMS density matrix=1.00D-08 within 128 cycles.
 Requested convergence on MAX density matrix=1.00D-06.
 Requested convergence on             energy=1.00D-06.
 No special actions if energy rises.
 Integral accuracy reduced to 1.0D-05 until final iterations.
 Initial convergence to 1.0D-05 achieved.  Increase integral accuracy.
 SCF Done:  E(RB+HF-LYP) =  -1345.22833750     A.U. after    9 cycles
             Convg  =    0.8988D-08             -V/T =  2.0096
             S**2   =   0.0000
 ***** Axes restored to original set *****
 -------------------------------------------------------------------
 Center     Atomic                   Forces (Hartrees/Bohr)
 Number     Number              X              Y              Z
 -------------------------------------------------------------------
    1          6           0.000011014    0.000002507    0.000003333
    2          6          -0.000001396    0.000002886   -0.000058844
    3          6           0.000011377    0.000026717    0.000065950
    4          6          -0.000027879    0.000002988    0.000006768
    5          6          -0.000057458   -0.000002905   -0.000070030
    6          6           0.000051322   -0.000005103    0.000079130
    7          8           0.000162796   -0.000026751    0.000033783
    8          6          -0.000045225    0.000007867   -0.000130344
    9          6          -0.000050460   -0.000013473    0.000129384
   10          6           0.000315341    0.000077651   -0.000180751
   11          6          -0.000105517   -0.000060649    0.000014452
   12          6           0.000012904    0.000005166    0.000045504
   13          6           0.000037492    0.000003844    0.000018894
   14          6          -0.000114700   -0.000053718   -0.000075230
   15          6           0.000042954    0.000021514    0.000008356
   16          6           0.000048886    0.000029737   -0.000011070
   17          8           0.000133701    0.000075453   -0.000119679
   18          6          -0.000256176    0.000003119   -0.000105212
   19          6           0.000038938   -0.000016234    0.000086378
   20          6           0.000015218    0.000000098    0.000000720
   21          6           0.000003745   -0.000000681   -0.000014694
   22          6           0.000029038   -0.000016292   -0.000014831
   23          6          -0.000037111    0.000017271    0.000019205
   24          6          -0.000018597    0.000025545   -0.000024124
   25          8          -0.000200436   -0.000038374    0.000084578
   26          6          -0.000089701   -0.000081192    0.000255304
   27          6          -0.000059647   -0.000024182   -0.000049927
   28          6           0.000027960   -0.000031648   -0.000003009
   29          6          -0.000012945   -0.000021497    0.000016010
   30          6           0.000012949    0.000004994    0.000001324
   31          6           0.000004234    0.000017853   -0.000014119
   32          6           0.000007986    0.000025551    0.000002180
   33          1          -0.000012232   -0.000002555   -0.000005338
   34          1          -0.000014292   -0.000001861    0.000012093
   35          1           0.000017266   -0.000008821    0.000005364
   36          1           0.000018910   -0.000000727    0.000013952
   37          1           0.000017582    0.000000927    0.000031703
   38          1          -0.000016229   -0.000015806   -0.000013449
   39          1           0.000003244    0.000002826   -0.000019151
   40          1          -0.000003167    0.000004767   -0.000014541
   41          1          -0.000013214   -0.000005865    0.000013699
   42          1          -0.000000721    0.000004846    0.000036771
   43          1           0.000040710    0.000031134   -0.000005357
   44          1           0.000046349   -0.000022932    0.000006464
   45          1          -0.000008402    0.000009085   -0.000012353
   46          1          -0.000012183    0.000009248    0.000006862
   47          1          -0.000003914    0.000003766    0.000016382
   48          1           0.000010276   -0.000009863    0.000011486
   49          1           0.000010418   -0.000006980   -0.000002981
   50          1           0.000038329    0.000001234   -0.000052830
   51          1           0.000011560    0.000046573   -0.000012637
   52          1           0.000002790    0.000014300   -0.000007420
   53          1          -0.000004044    0.000013208   -0.000013763
   54          1          -0.000011983   -0.000005307   -0.000009217
   55          1          -0.000008792   -0.000013766    0.000005337
   56          1           0.000001131   -0.000005494    0.000009539
 -------------------------------------------------------------------
 Cartesian Forces:  Max     0.000315341 RMS     0.000058132

 GradGradGradGradGradGradGradGradGradGradGradGradGradGradGradGradGradGrad
 Berny optimization.
 Internal  Forces:  Max     0.000220750 RMS     0.000027078
 Search for a local minimum.
 Step number   8 out of a maximum of 298
 All quantities printed in internal units (Hartrees-Bohrs-Radians)
 Update second derivatives using D2CorX and points  1  2  4  3  5
                                                        6  7  8
 Trust test= 1.43D+00 RLast= 2.56D-02 DXMaxT set to 2.27D-01
     Eigenvalues ---    0.00257   0.00651   0.00692   0.00913   0.01171
     Eigenvalues ---    0.01528   0.01603   0.01604   0.01605   0.01764
     Eigenvalues ---    0.01853   0.02007   0.02097   0.02138   0.02187
     Eigenvalues ---    0.02219   0.02231   0.02239   0.02243   0.02251
     Eigenvalues ---    0.02254   0.02257   0.02259   0.02263   0.02263
     Eigenvalues ---    0.02264   0.02267   0.02267   0.02267   0.02271
     Eigenvalues ---    0.02273   0.02275   0.02280   0.02282   0.02286
     Eigenvalues ---    0.02287   0.02287   0.02293   0.02293   0.02294
     Eigenvalues ---    0.02296   0.02302   0.02306   0.02324   0.02352
     Eigenvalues ---    0.02431   0.02446   0.03023   0.04810   0.06446
     Eigenvalues ---    0.06450   0.07356   0.07432   0.11286   0.11477
     Eigenvalues ---    0.13896   0.13935   0.15207   0.15860   0.15998
     Eigenvalues ---    0.15998   0.15999   0.15999   0.15999   0.16000
     Eigenvalues ---    0.16000   0.16000   0.16000   0.16000   0.16000
     Eigenvalues ---    0.16000   0.16000   0.16001   0.16004   0.16008
     Eigenvalues ---    0.16078   0.16092   0.21692   0.21995   0.22000
     Eigenvalues ---    0.22000   0.22000   0.22003   0.22004   0.22016
     Eigenvalues ---    0.22146   0.22634   0.22870   0.23020   0.23471
     Eigenvalues ---    0.23478   0.23809   0.23985   0.24138   0.24806
     Eigenvalues ---    0.24990   0.24995   0.25000   0.25000   0.25040
     Eigenvalues ---    0.25073   0.25324   0.29242   0.31228   0.31491
     Eigenvalues ---    0.33097   0.35110   0.35166   0.35233   0.35351
     Eigenvalues ---    0.35380   0.35936   0.36388   0.36393   0.36420
     Eigenvalues ---    0.36472   0.36504   0.36510   0.36516   0.36519
     Eigenvalues ---    0.36520   0.36579   0.36630   0.36657   0.36688
     Eigenvalues ---    0.36714   0.36758   0.36866   0.36886   0.36931
     Eigenvalues ---    0.37343   0.38763   0.41318   0.42742   0.43132
     Eigenvalues ---    0.43396   0.43398   0.43437   0.43487   0.43500
     Eigenvalues ---    0.44537   0.45772   0.46542   0.47054   0.47259
     Eigenvalues ---    0.47416   0.47512   0.47752   0.47871   0.47894
     Eigenvalues ---    0.48033   0.48159   0.48172   0.48389   0.48530
     Eigenvalues ---    0.49189   0.49751   0.52270   0.56255   0.58184
     Eigenvalues ---    0.59693   0.963561000.000001000.000001000.00000
     Eigenvalues --- 1000.000001000.000001000.000001000.000001000.00000
     Eigenvalues --- 1000.000001000.000001000.000001000.000001000.00000
     Eigenvalues --- 1000.000001000.000001000.000001000.000001000.00000
     Eigenvalues --- 1000.000001000.000001000.000001000.000001000.00000
     Eigenvalues --- 1000.000001000.000001000.000001000.000001000.00000
     Eigenvalues --- 1000.000001000.000001000.000001000.000001000.00000
     Eigenvalues --- 1000.000001000.000001000.000001000.000001000.00000
     Eigenvalues --- 1000.000001000.000001000.000001000.000001000.00000
     Eigenvalues --- 1000.000001000.000001000.000001000.000001000.00000
     Eigenvalues --- 1000.000001000.000001000.000001000.000001000.00000
     Eigenvalues --- 1000.000001000.000001000.000001000.000001000.00000
     Eigenvalues --- 1000.000001000.000001000.000001000.000001000.00000
     Eigenvalues --- 1000.000001000.000001000.000001000.000001000.00000
     Eigenvalues --- 1000.000001000.000001000.000001000.000001000.00000
     Eigenvalues --- 1000.000001000.000001000.000001000.000001000.00000
     Eigenvalues --- 1000.000001000.000001000.000001000.000001000.00000
     Eigenvalues --- 1000.000001000.000001000.000001000.000001000.00000
     Eigenvalues --- 1000.000001000.000001000.000001000.000001000.00000
     Eigenvalues --- 1000.000001000.000001000.000001000.000001000.00000
     Eigenvalues --- 1000.000001000.000001000.000001000.000001000.00000
     Eigenvalues --- 1000.000001000.000001000.000001000.000001000.00000
     Eigenvalues --- 1000.000001000.000001000.000001000.000001000.00000
     Eigenvalues --- 1000.000001000.000001000.000001000.000001000.00000
     Eigenvalues --- 1000.000001000.000001000.000001000.000001000.00000
     Eigenvalues --- 1000.000001000.000001000.00000
 RFO step:  Lambda=-6.21152909D-07.
 Quartic linear search produced a step of  0.41453.
 Iteration  1 RMS(Cart)=  0.00354238 RMS(Int)=  0.00000393
 Iteration  2 RMS(Cart)=  0.00000837 RMS(Int)=  0.00000004
 Iteration  3 RMS(Cart)=  0.00000000 RMS(Int)=  0.00000004
 Variable       Old X    -DE/DX   Delta X   Delta X   Delta X     New X
                                 (Linear)    (Quad)   (Total)
    R1        2.61270   0.00000   0.00004  -0.00004   0.00000   2.61270
    R2        2.66996  -0.00001   0.00002  -0.00004  -0.00002   2.66994
    R3        2.05110   0.00001   0.00001   0.00002   0.00003   2.05113
    R4        2.65857   0.00004   0.00008   0.00007   0.00014   2.65871
    R5        2.05012   0.00002   0.00003   0.00002   0.00005   2.05017
    R6        2.64557   0.00000   0.00004  -0.00008  -0.00003   2.64554
    R7        2.57190   0.00000  -0.00023   0.00003  -0.00019   2.57171
    R8        2.63404   0.00004   0.00012   0.00003   0.00015   2.63419
    R9        2.04655   0.00002   0.00001   0.00005   0.00006   2.04661
   R10        2.65375  -0.00004  -0.00009  -0.00007  -0.00016   2.65359
   R11        2.05346   0.00001   0.00002   0.00000   0.00002   2.05348
   R12        2.75344   0.00005   0.00021   0.00011   0.00032   2.75377
   R13        2.70322  -0.00013  -0.00012  -0.00033  -0.00045   2.70276
   R14        2.55025  -0.00003  -0.00005  -0.00007  -0.00012   2.55013
   R15        2.05828   0.00000   0.00001  -0.00002  -0.00001   2.05828
   R16        2.80069   0.00008   0.00019   0.00025   0.00045   2.80114
   R17        2.04876   0.00001   0.00002  -0.00004  -0.00003   2.04873
   R18        2.82856   0.00002   0.00014   0.00011   0.00026   2.82882
   R19        2.32936  -0.00022  -0.00017  -0.00022  -0.00039   2.32897
   R20        2.64939  -0.00001   0.00002  -0.00002   0.00000   2.64939
   R21        2.65939  -0.00007   0.00003  -0.00013  -0.00010   2.65928
   R22        2.62854   0.00002   0.00003   0.00003   0.00005   2.62859
   R23        2.04969   0.00001   0.00004  -0.00001   0.00003   2.04972
   R24        2.65120   0.00004   0.00007   0.00000   0.00007   2.65127
   R25        2.04701   0.00001   0.00002   0.00004   0.00006   2.04707
   R26        2.65208   0.00004   0.00006   0.00004   0.00010   2.65218
   R27        2.57255  -0.00005  -0.00023  -0.00007  -0.00030   2.57225
   R28        2.62095   0.00001   0.00003   0.00000   0.00003   2.62098
   R29        2.04998   0.00002   0.00002   0.00002   0.00004   2.05003
   R30        2.04922   0.00003   0.00001   0.00003   0.00004   2.04926
   R31        2.70290  -0.00014  -0.00014  -0.00036  -0.00050   2.70240
   R32        2.85092   0.00006   0.00008   0.00018   0.00026   2.85118
   R33        2.07904   0.00005  -0.00004   0.00014   0.00010   2.07914
   R34        2.07484   0.00005   0.00000   0.00012   0.00012   2.07496
   R35        2.64660   0.00000   0.00002  -0.00003  -0.00001   2.64659
   R36        2.64211  -0.00002   0.00001  -0.00006  -0.00005   2.64206
   R37        2.63366   0.00000   0.00004  -0.00002   0.00001   2.63367
   R38        2.05090   0.00002   0.00003   0.00002   0.00005   2.05095
   R39        2.63994   0.00001   0.00004   0.00001   0.00004   2.63998
   R40        2.05250   0.00002   0.00002   0.00002   0.00004   2.05255
   R41        2.63550  -0.00002   0.00005  -0.00008  -0.00003   2.63546
   R42        2.05224   0.00002   0.00002   0.00002   0.00004   2.05228
   R43        2.63806   0.00002   0.00004   0.00003   0.00007   2.63813
   R44        2.05227   0.00002   0.00002   0.00003   0.00005   2.05232
   R45        2.05456   0.00001   0.00002   0.00001   0.00003   2.05459
   R46        2.85138   0.00007   0.00009   0.00021   0.00030   2.85168
   R47        2.07886   0.00004  -0.00002   0.00013   0.00011   2.07897
   R48        2.07461   0.00005   0.00000   0.00013   0.00013   2.07475
   R49        2.64216   0.00000   0.00003  -0.00003   0.00000   2.64216
   R50        2.64651  -0.00002   0.00000  -0.00005  -0.00005   2.64646
   R51        2.63803   0.00001   0.00003   0.00000   0.00003   2.63807
   R52        2.05458   0.00002   0.00003   0.00002   0.00005   2.05462
   R53        2.63553  -0.00001   0.00006  -0.00006   0.00000   2.63553
   R54        2.05231   0.00002   0.00002   0.00003   0.00005   2.05236
   R55        2.63990   0.00000   0.00003  -0.00002   0.00000   2.63990
   R56        2.05229   0.00002   0.00002   0.00002   0.00004   2.05232
   R57        2.63377   0.00001   0.00005   0.00000   0.00005   2.63382
   R58        2.05255   0.00002   0.00002   0.00002   0.00004   2.05259
   R59        2.05078   0.00001   0.00002   0.00000   0.00002   2.05080
    A1        2.11735   0.00000   0.00000  -0.00001  -0.00001   2.11735
    A2        2.07381   0.00000  -0.00009   0.00003  -0.00006   2.07375
    A3        2.09202   0.00000   0.00008  -0.00002   0.00006   2.09208
    A4        2.10016   0.00002   0.00000   0.00007   0.00007   2.10024
    A5        2.11784   0.00000  -0.00002  -0.00001  -0.00003   2.11781
    A6        2.06518  -0.00001   0.00002  -0.00006  -0.00004   2.06514
    A7        2.08627  -0.00004  -0.00007  -0.00009  -0.00016   2.08611
    A8        2.01601   0.00001   0.00001   0.00012   0.00013   2.01615
    A9        2.18090   0.00003   0.00005  -0.00003   0.00002   2.18092
   A10        2.08325   0.00001   0.00007   0.00001   0.00008   2.08333
   A11        2.11544   0.00000   0.00004  -0.00005   0.00000   2.11544
   A12        2.08450  -0.00001  -0.00011   0.00003  -0.00008   2.08442
   A13        2.13160   0.00001  -0.00007   0.00006  -0.00001   2.13159
   A14        2.07631  -0.00003  -0.00002  -0.00018  -0.00020   2.07612
   A15        2.07527   0.00002   0.00009   0.00011   0.00020   2.07548
   A16        2.04774   0.00000   0.00006  -0.00005   0.00002   2.04775
   A17        2.15936  -0.00001   0.00003  -0.00005  -0.00003   2.15934
   A18        2.07608   0.00001  -0.00009   0.00010   0.00001   2.07609
   A19        2.07072   0.00007   0.00020   0.00010   0.00030   2.07102
   A20        2.23961   0.00000  -0.00015   0.00010  -0.00005   2.23956
   A21        2.02629  -0.00004  -0.00019  -0.00019  -0.00038   2.02590
   A22        2.01729   0.00004   0.00034   0.00009   0.00044   2.01772
   A23        2.09400  -0.00002  -0.00009  -0.00009  -0.00018   2.09382
   A24        2.11203   0.00003  -0.00020   0.00020   0.00000   2.11203
   A25        2.07700  -0.00001   0.00029  -0.00010   0.00019   2.07719
   A26        2.08072  -0.00012   0.00000  -0.00022  -0.00022   2.08049
   A27        2.11148   0.00005  -0.00007   0.00008   0.00002   2.11150
   A28        2.09094   0.00007   0.00007   0.00014   0.00021   2.09115
   A29        2.05369   0.00002  -0.00019   0.00002  -0.00017   2.05352
   A30        2.17106  -0.00003   0.00025  -0.00002   0.00023   2.17129
   A31        2.05832   0.00002  -0.00006   0.00001  -0.00005   2.05827
   A32        2.12525   0.00000   0.00000   0.00005   0.00005   2.12530
   A33        2.05489   0.00002   0.00003   0.00010   0.00012   2.05501
   A34        2.10305  -0.00002  -0.00003  -0.00014  -0.00017   2.10288
   A35        2.08435   0.00000   0.00007   0.00000   0.00007   2.08442
   A36        2.08531   0.00000  -0.00012   0.00012   0.00000   2.08530
   A37        2.11352  -0.00001   0.00005  -0.00012  -0.00006   2.11346
   A38        2.08800  -0.00005  -0.00008  -0.00012  -0.00020   2.08780
   A39        2.17735   0.00004   0.00000   0.00002   0.00002   2.17737
   A40        2.01783   0.00001   0.00008   0.00010   0.00018   2.01801
   A41        2.09735   0.00003   0.00000   0.00012   0.00012   2.09747
   A42        2.06751   0.00000   0.00007  -0.00003   0.00004   2.06755
   A43        2.11832  -0.00002  -0.00007  -0.00009  -0.00016   2.11816
   A44        2.11304   0.00000   0.00007  -0.00005   0.00002   2.11306
   A45        2.10664  -0.00001   0.00023  -0.00007   0.00015   2.10680
   A46        2.06331   0.00001  -0.00029   0.00013  -0.00016   2.06314
   A47        2.07149   0.00011   0.00021   0.00023   0.00043   2.07192
   A48        1.90082   0.00005  -0.00009   0.00037   0.00028   1.90110
   A49        1.90397   0.00000   0.00012   0.00006   0.00018   1.90415
   A50        1.92253   0.00000   0.00001   0.00012   0.00012   1.92265
   A51        1.92915  -0.00002  -0.00020  -0.00007  -0.00027   1.92888
   A52        1.92854  -0.00002   0.00001  -0.00016  -0.00015   1.92840
   A53        1.87873  -0.00001   0.00015  -0.00032  -0.00016   1.87857
   A54        2.10604  -0.00002  -0.00001  -0.00011  -0.00012   2.10592
   A55        2.09729   0.00002   0.00000   0.00011   0.00011   2.09740
   A56        2.07920   0.00000   0.00001   0.00000   0.00001   2.07921
   A57        2.10042   0.00000   0.00001  -0.00001   0.00000   2.10043
   A58        2.08274   0.00000   0.00006  -0.00003   0.00003   2.08277
   A59        2.09992   0.00000  -0.00006   0.00004  -0.00003   2.09990
   A60        2.09848   0.00000   0.00000   0.00000   0.00000   2.09848
   A61        2.08978   0.00000  -0.00002   0.00003   0.00000   2.08978
   A62        2.09493   0.00000   0.00003  -0.00003   0.00000   2.09493
   A63        2.08928   0.00000  -0.00002   0.00001  -0.00001   2.08926
   A64        2.09681   0.00000   0.00001  -0.00001   0.00000   2.09681
   A65        2.09709   0.00000   0.00001   0.00000   0.00001   2.09710
   A66        2.09466   0.00000   0.00002  -0.00002   0.00000   2.09467
   A67        2.09763   0.00000   0.00000   0.00001   0.00002   2.09765
   A68        2.09085   0.00000  -0.00002   0.00000  -0.00002   2.09083
   A69        2.10428   0.00000  -0.00002   0.00002   0.00000   2.10427
   A70        2.08876   0.00000   0.00005  -0.00002   0.00004   2.08879
   A71        2.09015   0.00000  -0.00004   0.00000  -0.00004   2.09012
   A72        1.90074   0.00007  -0.00004   0.00044   0.00040   1.90113
   A73        1.90440   0.00001   0.00010   0.00015   0.00025   1.90465
   A74        1.92362  -0.00001   0.00001   0.00002   0.00003   1.92364
   A75        1.92895  -0.00003  -0.00014  -0.00017  -0.00031   1.92864
   A76        1.92760  -0.00002  -0.00005  -0.00011  -0.00016   1.92744
   A77        1.87847  -0.00001   0.00013  -0.00034  -0.00021   1.87826
   A78        2.09667  -0.00001  -0.00013   0.00000  -0.00013   2.09654
   A79        2.10671   0.00001   0.00011   0.00001   0.00012   2.10683
   A80        2.07913   0.00000   0.00001  -0.00001  -0.00001   2.07912
   A81        2.10438   0.00000  -0.00001   0.00002   0.00001   2.10438
   A82        2.08842   0.00000   0.00007   0.00001   0.00008   2.08851
   A83        2.09038  -0.00001  -0.00006  -0.00003  -0.00009   2.09029
   A84        2.09464   0.00000   0.00002   0.00000   0.00002   2.09466
   A85        2.09090   0.00000  -0.00002  -0.00002  -0.00004   2.09086
   A86        2.09760   0.00000   0.00000   0.00002   0.00002   2.09762
   A87        2.08921  -0.00001  -0.00003  -0.00002  -0.00005   2.08915
   A88        2.09710   0.00000   0.00002   0.00001   0.00002   2.09712
   A89        2.09687   0.00000   0.00001   0.00002   0.00003   2.09690
   A90        2.09856   0.00001   0.00001   0.00003   0.00004   2.09860
   A91        2.09483   0.00000   0.00002  -0.00002   0.00000   2.09483
   A92        2.08979   0.00000  -0.00003  -0.00001  -0.00004   2.08975
   A93        2.10040   0.00000   0.00000  -0.00001  -0.00001   2.10039
   A94        2.08227   0.00000   0.00003   0.00000   0.00003   2.08230
   A95        2.10041   0.00000  -0.00003   0.00001  -0.00002   2.10039
    D1       -0.00033   0.00000   0.00009  -0.00005   0.00004  -0.00029
    D2        3.14045   0.00000   0.00000  -0.00004  -0.00004   3.14042
    D3       -3.13872   0.00000   0.00001   0.00002   0.00003  -3.13869
    D4        0.00206   0.00000  -0.00008   0.00004  -0.00004   0.00202
    D5        0.00083   0.00000   0.00018   0.00000   0.00018   0.00101
    D6       -3.13900   0.00000   0.00028   0.00002   0.00031  -3.13870
    D7        3.13918   0.00000   0.00026  -0.00007   0.00018   3.13937
    D8       -0.00065   0.00000   0.00036  -0.00005   0.00031  -0.00034
    D9       -0.00199   0.00000  -0.00034   0.00008  -0.00026  -0.00225
   D10       -3.14052   0.00000  -0.00031   0.00004  -0.00027  -3.14079
   D11        3.14039   0.00000  -0.00026   0.00007  -0.00019   3.14020
   D12        0.00186   0.00000  -0.00023   0.00003  -0.00020   0.00166
   D13        0.00375   0.00000   0.00032  -0.00006   0.00026   0.00401
   D14       -3.13645   0.00001   0.00042   0.00003   0.00045  -3.13600
   D15       -3.14121   0.00000   0.00029  -0.00002   0.00027  -3.14094
   D16        0.00177   0.00001   0.00038   0.00008   0.00046   0.00223
   D17       -3.11324   0.00002   0.00003   0.00070   0.00073  -3.11252
   D18        0.03160   0.00002   0.00007   0.00065   0.00072   0.03232
   D19       -0.00332   0.00000  -0.00005   0.00001  -0.00004  -0.00336
   D20        3.13969   0.00000  -0.00003   0.00003  -0.00001   3.13968
   D21        3.13691   0.00000  -0.00014  -0.00008  -0.00022   3.13669
   D22       -0.00327   0.00000  -0.00013  -0.00007  -0.00019  -0.00346
   D23        0.00102   0.00000  -0.00020   0.00002  -0.00018   0.00083
   D24        3.14093   0.00000  -0.00030   0.00000  -0.00030   3.14063
   D25        3.14120   0.00000  -0.00022   0.00000  -0.00021   3.14099
   D26       -0.00207   0.00000  -0.00031  -0.00002  -0.00033  -0.00240
   D27       -0.02791   0.00000   0.00050  -0.00042   0.00008  -0.02783
   D28        3.11304   0.00000   0.00034  -0.00023   0.00011   3.11315
   D29        3.11547   0.00000   0.00061  -0.00040   0.00021   3.11568
   D30       -0.02676   0.00000   0.00044  -0.00021   0.00024  -0.02652
   D31        3.08743  -0.00001  -0.00120  -0.00039  -0.00159   3.08584
   D32        0.98044  -0.00002  -0.00098  -0.00056  -0.00153   0.97891
   D33       -1.07811  -0.00001  -0.00124  -0.00028  -0.00151  -1.07963
   D34        3.12770   0.00001  -0.00012   0.00034   0.00022   3.12791
   D35        0.00516   0.00000  -0.00049   0.00019  -0.00030   0.00486
   D36       -0.01326   0.00001   0.00005   0.00015   0.00019  -0.01307
   D37       -3.13580   0.00000  -0.00033   0.00000  -0.00033  -3.13612
   D38        3.08054   0.00000   0.00155  -0.00074   0.00081   3.08135
   D39       -0.07180   0.00001   0.00178  -0.00067   0.00112  -0.07069
   D40       -0.07972   0.00001   0.00191  -0.00059   0.00132  -0.07841
   D41        3.05112   0.00001   0.00214  -0.00052   0.00162   3.05274
   D42        2.98113   0.00002   0.00398  -0.00078   0.00320   2.98433
   D43       -0.17724   0.00003   0.00446  -0.00062   0.00384  -0.17340
   D44       -0.14984   0.00001   0.00375  -0.00085   0.00291  -0.14694
   D45        2.97497   0.00002   0.00423  -0.00069   0.00354   2.97851
   D46        3.13548   0.00000   0.00026  -0.00011   0.00015   3.13563
   D47       -0.00631   0.00000   0.00007   0.00010   0.00017  -0.00614
   D48        0.00956  -0.00001  -0.00019  -0.00026  -0.00045   0.00911
   D49       -3.13223   0.00000  -0.00038  -0.00005  -0.00043  -3.13266
   D50       -3.12672   0.00000  -0.00041   0.00004  -0.00038  -3.12710
   D51       -0.00674   0.00000   0.00009   0.00000   0.00008  -0.00666
   D52       -0.00195   0.00001   0.00007   0.00019   0.00026  -0.00169
   D53        3.11803   0.00001   0.00057   0.00016   0.00072   3.11875
   D54       -0.00998   0.00000   0.00008   0.00015   0.00023  -0.00975
   D55        3.13037   0.00000   0.00006   0.00005   0.00011   3.13048
   D56        3.13182   0.00000   0.00028  -0.00007   0.00021   3.13203
   D57       -0.01102   0.00000   0.00025  -0.00017   0.00009  -0.01093
   D58        0.00269   0.00000   0.00015   0.00003   0.00018   0.00287
   D59       -3.14124   0.00000  -0.00001  -0.00002  -0.00003  -3.14127
   D60       -3.13764   0.00001   0.00017   0.00013   0.00031  -3.13734
   D61        0.00161   0.00000   0.00002   0.00008   0.00009   0.00170
   D62        0.00470  -0.00001  -0.00027  -0.00010  -0.00036   0.00434
   D63       -3.13453   0.00000  -0.00035  -0.00003  -0.00038  -3.13491
   D64       -3.13476   0.00000  -0.00012  -0.00005  -0.00017  -3.13493
   D65        0.00919   0.00000  -0.00020   0.00002  -0.00019   0.00900
   D66        0.04174   0.00001   0.00026   0.00004   0.00030   0.04204
   D67       -3.10210   0.00000   0.00011  -0.00001   0.00009  -3.10201
   D68       -0.00506   0.00000   0.00016  -0.00002   0.00014  -0.00492
   D69       -3.12556   0.00000  -0.00033   0.00002  -0.00032  -3.12588
   D70        3.13410   0.00000   0.00024  -0.00009   0.00016   3.13426
   D71        0.01360   0.00000  -0.00025  -0.00005  -0.00030   0.01330
   D72        3.08426  -0.00001  -0.00096  -0.00023  -0.00119   3.08307
   D73        0.97731  -0.00001  -0.00082  -0.00038  -0.00120   0.97611
   D74       -1.08183   0.00000  -0.00104  -0.00007  -0.00111  -1.08294
   D75       -0.77264   0.00000  -0.00014  -0.00066  -0.00080  -0.77344
   D76        2.40812   0.00000  -0.00004  -0.00067  -0.00072   2.40741
   D77        1.31880   0.00001  -0.00017  -0.00040  -0.00057   1.31823
   D78       -1.78362   0.00001  -0.00007  -0.00041  -0.00049  -1.78410
   D79       -2.88661  -0.00002  -0.00010  -0.00094  -0.00104  -2.88765
   D80        0.29416  -0.00002   0.00000  -0.00095  -0.00096   0.29320
   D81       -3.10256   0.00000   0.00015  -0.00010   0.00005  -3.10251
   D82        0.05412   0.00000   0.00014  -0.00010   0.00004   0.05416
   D83        0.00026   0.00000   0.00005  -0.00009  -0.00004   0.00023
   D84       -3.12624   0.00000   0.00004  -0.00008  -0.00004  -3.12629
   D85        3.09401   0.00000  -0.00019   0.00023   0.00004   3.09406
   D86       -0.05057   0.00000  -0.00008   0.00002  -0.00006  -0.05064
   D87       -0.00901   0.00000  -0.00009   0.00022   0.00013  -0.00888
   D88        3.12959   0.00000   0.00001   0.00001   0.00003   3.12962
   D89        0.00773   0.00000   0.00000  -0.00003  -0.00003   0.00769
   D90       -3.13565   0.00000  -0.00002   0.00000  -0.00002  -3.13567
   D91        3.13408   0.00000   0.00001  -0.00004  -0.00002   3.13406
   D92       -0.00929   0.00000   0.00000   0.00000  -0.00001  -0.00930
   D93       -0.00699   0.00000  -0.00001   0.00002   0.00000  -0.00698
   D94        3.13936   0.00000   0.00000   0.00001   0.00001   3.13937
   D95        3.13639   0.00000   0.00000  -0.00001  -0.00001   3.13638
   D96       -0.00045   0.00000   0.00002  -0.00002   0.00000  -0.00045
   D97       -0.00172   0.00000  -0.00002   0.00011   0.00009  -0.00163
   D98       -3.13299   0.00000   0.00001   0.00001   0.00002  -3.13297
   D99        3.13512   0.00000  -0.00004   0.00012   0.00008   3.13520
   D100       0.00385   0.00000  -0.00001   0.00002   0.00001   0.00386
   D101       0.00978   0.00000   0.00007  -0.00023  -0.00016   0.00962
   D102      -3.12882   0.00000  -0.00003  -0.00003  -0.00005  -3.12887
   D103       3.14109   0.00000   0.00004  -0.00013  -0.00009   3.14100
   D104       0.00250   0.00000  -0.00006   0.00007   0.00001   0.00251
   D105       2.42298   0.00001   0.00181   0.00120   0.00301   2.42599
   D106      -0.75836   0.00001   0.00165   0.00100   0.00264  -0.75572
   D107      -1.76840   0.00004   0.00181   0.00156   0.00337  -1.76502
   D108       1.33344   0.00004   0.00165   0.00136   0.00301   1.33645
   D109       0.30832   0.00000   0.00185   0.00096   0.00281   0.31114
   D110      -2.87302  -0.00001   0.00169   0.00075   0.00245  -2.87058
   D111       3.09340   0.00000  -0.00025   0.00003  -0.00022   3.09317
   D112      -0.05089   0.00000  -0.00022  -0.00014  -0.00036  -0.05125
   D113      -0.00907   0.00000  -0.00009   0.00023   0.00014  -0.00894
   D114       3.12983   0.00000  -0.00006   0.00006   0.00000   3.12983
   D115      -3.10200   0.00000   0.00022   0.00011   0.00032  -3.10168
   D116       0.05470   0.00000   0.00022   0.00013   0.00035   0.05505
   D117       0.00023   0.00000   0.00005  -0.00010  -0.00004   0.00019
   D118      -3.12625   0.00000   0.00006  -0.00008  -0.00002  -3.12627
   D119       0.00999   0.00000   0.00007  -0.00025  -0.00018   0.00981
   D120       3.14109   0.00000   0.00004  -0.00014  -0.00010   3.14099
   D121      -3.12891   0.00000   0.00004  -0.00008  -0.00004  -3.12895
   D122       0.00219   0.00000   0.00001   0.00003   0.00004   0.00223
   D123      -0.00198   0.00000   0.00000   0.00013   0.00013  -0.00185
   D124       3.13487   0.00000  -0.00005   0.00013   0.00007   3.13495
   D125      -3.13304   0.00000   0.00003   0.00002   0.00005  -3.13300
   D126       0.00381   0.00000  -0.00003   0.00002  -0.00001   0.00381
   D127      -0.00682   0.00000  -0.00004   0.00000  -0.00004  -0.00685
   D128       3.13650   0.00000  -0.00005  -0.00003  -0.00008   3.13642
   D129       3.13951   0.00000   0.00001   0.00001   0.00002   3.13953
   D130      -0.00036   0.00000   0.00001  -0.00003  -0.00002  -0.00038
   D131       0.00770   0.00000   0.00001  -0.00002   0.00000   0.00770
   D132       3.13403   0.00000   0.00001  -0.00004  -0.00003   3.13400
   D133      -3.13561   0.00000   0.00002   0.00002   0.00004  -3.13557
   D134      -0.00928   0.00000   0.00002  -0.00001   0.00001  -0.00927
         Item               Value     Threshold  Converged?
 Maximum Force            0.000221     0.000450     YES
 RMS     Force            0.000027     0.000300     YES
 Maximum Displacement     0.014163     0.001800     NO 
 RMS     Displacement     0.003543     0.001200     NO 
 Predicted change in Energy=-8.444420D-07
 GradGradGradGradGradGradGradGradGradGradGradGradGradGradGradGradGradGrad

 Stoichiometry    C29H24O3
 Framework group  C1[X(C29H24O3)]
 Deg. of freedom   162
 Full point group                 C1      NOp   1
 Largest Abelian subgroup         C1      NOp   1
 Largest concise Abelian subgroup C1      NOp   1
                         Standard orientation:                         
 ---------------------------------------------------------------------
 Center     Atomic     Atomic              Coordinates (Angstroms)
 Number     Number      Type              X           Y           Z
 ---------------------------------------------------------------------
    1          6             0        2.780811   -0.161523    0.061100
    2          6             0        4.059543   -0.687241    0.060515
    3          6             0        5.176059    0.159936   -0.062503
    4          6             0        4.983765    1.541000   -0.187282
    5          6             0        3.687599    2.053875   -0.182610
    6          6             0        2.558228    1.228424   -0.060219
    7          8             0        6.387009   -0.460970   -0.052509
    8          6             0        1.234924    1.838654   -0.062273
    9          6             0        0.032884    1.230282    0.015509
   10          6             0       -1.208418    2.040453    0.014907
   11          6             0       -2.534216    1.345445    0.023206
   12          6             0       -3.679430    2.130654    0.216919
   13          6             0       -4.954435    1.574808    0.232912
   14          6             0       -5.106786    0.193630    0.039187
   15          6             0       -3.972606   -0.607601   -0.164291
   16          6             0       -2.708117   -0.037760   -0.168628
   17          8             0       -6.299527   -0.462223    0.033571
   18          6             0        7.569138    0.339656   -0.137109
   19          6             0        8.776944   -0.558052   -0.028735
   20          6             0        8.827621   -1.573990    0.933939
   21          6             0        9.965241   -2.369285    1.059096
   22          6             0       11.069108   -2.153374    0.230533
   23          6             0       11.025407   -1.142834   -0.729615
   24          6             0        9.881503   -0.353453   -0.861097
   25          8             0       -1.162150    3.272015    0.018736
   26          6             0       -7.501771    0.297043    0.185757
   27          6             0       -8.685456   -0.631167    0.065228
   28          6             0       -9.782190   -0.484324    0.919918
   29          6             0      -10.906208   -1.300191    0.779302
   30          6             0      -10.937381   -2.279994   -0.212717
   31          6             0       -9.841058   -2.438234   -1.063938
   32          6             0       -8.723531   -1.616285   -0.929427
   33          1             0        1.937313   -0.837399    0.160179
   34          1             0        4.231000   -1.754359    0.154730
   35          1             0        5.823366    2.217536   -0.288766
   36          1             0        3.546172    3.127052   -0.278074
   37          1             0        1.208818    2.925082   -0.135312
   38          1             0       -0.043119    0.151822    0.096197
   39          1             0       -3.542495    3.197612    0.356015
   40          1             0       -5.813017    2.214901    0.395929
   41          1             0       -4.112620   -1.672260   -0.318398
   42          1             0       -1.855167   -0.684169   -0.343547
   43          1             0        7.563024    1.077994    0.678572
   44          1             0        7.584851    0.892220   -1.085830
   45          1             0        7.966664   -1.745090    1.572207
   46          1             0        9.991743   -3.158014    1.805386
   47          1             0       11.955587   -2.772684    0.330786
   48          1             0       11.876045   -0.973434   -1.383220
   49          1             0        9.847541    0.425372   -1.618974
   50          1             0       -7.539395    1.072664   -0.593543
   51          1             0       -7.509704    0.803875    1.159647
   52          1             0       -9.757457    0.270335    1.702229
   53          1             0      -11.750885   -1.175631    1.450521
   54          1             0      -11.808145   -2.920083   -0.320177
   55          1             0       -9.857732   -3.202834   -1.835242
   56          1             0       -7.868088   -1.742391   -1.585208
 ---------------------------------------------------------------------
 Rotational constants (GHZ):      0.4695471      0.0244260      0.0234578
 Standard basis: 6-31G(d,p) (6D, 7F)
 There are   600 symmetry adapted basis functions of A   symmetry.
 Integral buffers will be    262144 words long.
 Raffenetti 2 integral format.
 Two-electron integral symmetry is turned on.
   600 basis functions,  1064 primitive gaussians,   600 cartesian basis functions
   111 alpha electrons      111 beta electrons
       nuclear repulsion energy      2501.0613617871 Hartrees.
 NAtoms=   56 NActive=   56 NUniq=   56 SFac= 1.00D+00 NAtFMM=   60 Big=F
 One-electron integrals computed using PRISM.
 NBasis=   600 RedAO= T  NBF=   600
 NBsUse=   600 1.00D-06 NBFU=   600
 Initial guess read from the read-write file:
 Initial guess orbital symmetries:
       Occupied  (A) (A) (A) (A) (A) (A) (A) (A) (A) (A) (A) (A)
                 (A) (A) (A) (A) (A) (A) (A) (A) (A) (A) (A) (A)
                 (A) (A) (A) (A) (A) (A) (A) (A) (A) (A) (A) (A)
                 (A) (A) (A) (A) (A) (A) (A) (A) (A) (A) (A) (A)
                 (A) (A) (A) (A) (A) (A) (A) (A) (A) (A) (A) (A)
                 (A) (A) (A) (A) (A) (A) (A) (A) (A) (A) (A) (A)
                 (A) (A) (A) (A) (A) (A) (A) (A) (A) (A) (A) (A)
                 (A) (A) (A) (A) (A) (A) (A) (A) (A) (A) (A) (A)
                 (A) (A) (A) (A) (A) (A) (A) (A) (A) (A) (A) (A)
                 (A) (A) (A)
       Virtual   (A) (A) (A) (A) (A) (A) (A) (A) (A) (A) (A) (A)
                 (A) (A) (A) (A) (A) (A) (A) (A) (A) (A) (A) (A)
                 (A) (A) (A) (A) (A) (A) (A) (A) (A) (A) (A) (A)
                 (A) (A) (A) (A) (A) (A) (A) (A) (A) (A) (A) (A)
                 (A) (A) (A) (A) (A) (A) (A) (A) (A) (A) (A) (A)
                 (A) (A) (A) (A) (A) (A) (A) (A) (A) (A) (A) (A)
                 (A) (A) (A) (A) (A) (A) (A) (A) (A) (A) (A) (A)
                 (A) (A) (A) (A) (A) (A) (A) (A) (A) (A) (A) (A)
                 (A) (A) (A) (A) (A) (A) (A) (A) (A) (A) (A) (A)
                 (A) (A) (A) (A) (A) (A) (A) (A) (A) (A) (A) (A)
                 (A) (A) (A) (A) (A) (A) (A) (A) (A) (A) (A) (A)
                 (A) (A) (A) (A) (A) (A) (A) (A) (A) (A) (A) (A)
                 (A) (A) (A) (A) (A) (A) (A) (A) (A) (A) (A) (A)
                 (A) (A) (A) (A) (A) (A) (A) (A) (A) (A) (A) (A)
                 (A) (A) (A) (A) (A) (A) (A) (A) (A) (A) (A) (A)
                 (A) (A) (A) (A) (A) (A) (A) (A) (A) (A) (A) (A)
                 (A) (A) (A) (A) (A) (A) (A) (A) (A) (A) (A) (A)
                 (A) (A) (A) (A) (A) (A) (A) (A) (A) (A) (A) (A)
                 (A) (A) (A) (A) (A) (A) (A) (A) (A) (A) (A) (A)
                 (A) (A) (A) (A) (A) (A) (A) (A) (A) (A) (A) (A)
                 (A) (A) (A) (A) (A) (A) (A) (A) (A) (A) (A) (A)
                 (A) (A) (A) (A) (A) (A) (A) (A) (A) (A) (A) (A)
                 (A) (A) (A) (A) (A) (A) (A) (A) (A) (A) (A) (A)
                 (A) (A) (A) (A) (A) (A) (A) (A) (A) (A) (A) (A)
                 (A) (A) (A) (A) (A) (A) (A) (A) (A) (A) (A) (A)
                 (A) (A) (A) (A) (A) (A) (A) (A) (A) (A) (A) (A)
                 (A) (A) (A) (A) (A) (A) (A) (A) (A) (A) (A) (A)
                 (A) (A) (A) (A) (A) (A) (A) (A) (A) (A) (A) (A)
                 (A) (A) (A) (A) (A) (A) (A) (A) (A) (A) (A) (A)
                 (A) (A) (A) (A) (A) (A) (A) (A) (A) (A) (A) (A)
                 (A) (A) (A) (A) (A) (A) (A) (A) (A) (A) (A) (A)
                 (A) (A) (A) (A) (A) (A) (A) (A) (A) (A) (A) (A)
                 (A) (A) (A) (A) (A) (A) (A) (A) (A) (A) (A) (A)
                 (A) (A) (A) (A) (A) (A) (A) (A) (A) (A) (A) (A)
                 (A) (A) (A) (A) (A) (A) (A) (A) (A) (A) (A) (A)
                 (A) (A) (A) (A) (A) (A) (A) (A) (A) (A) (A) (A)
                 (A) (A) (A) (A) (A) (A) (A) (A) (A) (A) (A) (A)
                 (A) (A) (A) (A) (A) (A) (A) (A) (A) (A) (A) (A)
                 (A) (A) (A) (A) (A) (A) (A) (A) (A) (A) (A) (A)
                 (A) (A) (A) (A) (A) (A) (A) (A) (A) (A) (A) (A)
                 (A) (A) (A) (A) (A) (A) (A) (A) (A)
 Requested convergence on RMS density matrix=1.00D-08 within 128 cycles.
 Requested convergence on MAX density matrix=1.00D-06.
 Requested convergence on             energy=1.00D-06.
 No special actions if energy rises.
 SCF Done:  E(RB+HF-LYP) =  -1345.22833853     A.U. after    8 cycles
             Convg  =    0.4695D-08             -V/T =  2.0096
             S**2   =   0.0000
 ***** Axes restored to original set *****
 -------------------------------------------------------------------
 Center     Atomic                   Forces (Hartrees/Bohr)
 Number     Number              X              Y              Z
 -------------------------------------------------------------------
    1          6           0.000002293   -0.000001262    0.000021976
    2          6           0.000006302    0.000005225   -0.000005471
    3          6           0.000005136    0.000026162   -0.000058896
    4          6           0.000003392   -0.000003765   -0.000021548
    5          6          -0.000007601   -0.000001320    0.000019374
    6          6           0.000010330    0.000000035   -0.000037212
    7          8           0.000022756   -0.000035801    0.000079472
    8          6          -0.000007622    0.000000756    0.000036680
    9          6          -0.000004050   -0.000008298   -0.000000324
   10          6          -0.000004227   -0.000001776    0.000003736
   11          6          -0.000014622   -0.000007832    0.000011577
   12          6          -0.000004899   -0.000005072   -0.000007223
   13          6           0.000027999    0.000004457    0.000009493
   14          6           0.000018955   -0.000008963    0.000019177
   15          6           0.000012852    0.000006977   -0.000016398
   16          6           0.000002407    0.000010375   -0.000002540
   17          8          -0.000014743    0.000005561   -0.000071657
   18          6          -0.000084905    0.000013531   -0.000009672
   19          6           0.000023781   -0.000009970    0.000004200
   20          6          -0.000003872    0.000006137    0.000009761
   21          6          -0.000000794    0.000002174   -0.000009677
   22          6           0.000010686   -0.000007136   -0.000011288
   23          6          -0.000011039    0.000011673    0.000004108
   24          6          -0.000011133    0.000000576   -0.000003659
   25          8           0.000007115    0.000005776   -0.000009248
   26          6          -0.000046915   -0.000032152    0.000086798
   27          6          -0.000005405   -0.000014385    0.000002501
   28          6           0.000006997   -0.000008443   -0.000013908
   29          6           0.000007783   -0.000008553    0.000006063
   30          6           0.000006461   -0.000003701    0.000008810
   31          6          -0.000002293    0.000007990   -0.000011080
   32          6          -0.000004946    0.000011159    0.000011148
   33          1          -0.000000155    0.000001161   -0.000004625
   34          1          -0.000001497    0.000001537    0.000003245
   35          1          -0.000001253   -0.000002015   -0.000000187
   36          1           0.000003039    0.000000823    0.000001461
   37          1          -0.000001938    0.000001965   -0.000007219
   38          1          -0.000007993   -0.000003555   -0.000011956
   39          1          -0.000001040   -0.000002172   -0.000000873
   40          1          -0.000006142    0.000001165    0.000000612
   41          1          -0.000002946   -0.000001915    0.000001967
   42          1           0.000007475    0.000001859    0.000009805
   43          1           0.000017342    0.000010829   -0.000009301
   44          1           0.000021778   -0.000004882    0.000003694
   45          1           0.000000829    0.000000910   -0.000004852
   46          1          -0.000000320    0.000001757    0.000002743
   47          1          -0.000001547    0.000002527    0.000001679
   48          1           0.000001115    0.000000292    0.000000377
   49          1          -0.000000168    0.000001111   -0.000002677
   50          1           0.000021265    0.000007178   -0.000026777
   51          1           0.000005566    0.000019224   -0.000003033
   52          1           0.000000537    0.000001175    0.000001114
   53          1           0.000000640    0.000001596   -0.000000831
   54          1          -0.000000822   -0.000001477   -0.000000851
   55          1          -0.000000772   -0.000002462    0.000000546
   56          1           0.000000831    0.000003237    0.000000867
 -------------------------------------------------------------------
 Cartesian Forces:  Max     0.000086798 RMS     0.000017198

 GradGradGradGradGradGradGradGradGradGradGradGradGradGradGradGradGradGrad
 Berny optimization.
 Internal  Forces:  Max     0.000062998 RMS     0.000009064
 Search for a local minimum.
 Step number   9 out of a maximum of 298
 All quantities printed in internal units (Hartrees-Bohrs-Radians)
 Update second derivatives using D2CorX and points  1  2  4  3  5
                                                        6  7  8  9
 Trust test= 1.21D+00 RLast= 1.12D-02 DXMaxT set to 2.27D-01
     Eigenvalues ---    0.00223   0.00633   0.00682   0.00910   0.01169
     Eigenvalues ---    0.01497   0.01603   0.01604   0.01605   0.01766
     Eigenvalues ---    0.01853   0.02009   0.02097   0.02143   0.02186
     Eigenvalues ---    0.02220   0.02231   0.02237   0.02243   0.02251
     Eigenvalues ---    0.02256   0.02257   0.02260   0.02263   0.02263
     Eigenvalues ---    0.02264   0.02267   0.02267   0.02268   0.02273
     Eigenvalues ---    0.02273   0.02276   0.02280   0.02282   0.02286
     Eigenvalues ---    0.02287   0.02288   0.02293   0.02294   0.02295
     Eigenvalues ---    0.02297   0.02302   0.02309   0.02324   0.02352
     Eigenvalues ---    0.02404   0.02436   0.03020   0.04809   0.06444
     Eigenvalues ---    0.06447   0.07206   0.07358   0.11344   0.11480
     Eigenvalues ---    0.13908   0.13928   0.15386   0.15931   0.15998
     Eigenvalues ---    0.15999   0.15999   0.15999   0.16000   0.16000
     Eigenvalues ---    0.16000   0.16000   0.16000   0.16000   0.16000
     Eigenvalues ---    0.16000   0.16001   0.16002   0.16005   0.16016
     Eigenvalues ---    0.16082   0.16221   0.21865   0.21996   0.22000
     Eigenvalues ---    0.22000   0.22003   0.22003   0.22008   0.22058
     Eigenvalues ---    0.22112   0.22788   0.22987   0.22997   0.23444
     Eigenvalues ---    0.23473   0.23916   0.24036   0.24268   0.24753
     Eigenvalues ---    0.24990   0.24999   0.25000   0.25018   0.25059
     Eigenvalues ---    0.25147   0.25623   0.29288   0.31472   0.31539
     Eigenvalues ---    0.33089   0.35120   0.35155   0.35239   0.35351
     Eigenvalues ---    0.35364   0.35951   0.36387   0.36390   0.36420
     Eigenvalues ---    0.36471   0.36504   0.36510   0.36516   0.36518
     Eigenvalues ---    0.36520   0.36572   0.36629   0.36659   0.36689
     Eigenvalues ---    0.36714   0.36752   0.36837   0.36885   0.36931
     Eigenvalues ---    0.37287   0.38227   0.40716   0.42715   0.43135
     Eigenvalues ---    0.43396   0.43398   0.43448   0.43488   0.43504
     Eigenvalues ---    0.44546   0.45764   0.46665   0.47047   0.47351
     Eigenvalues ---    0.47480   0.47537   0.47755   0.47886   0.47898
     Eigenvalues ---    0.48042   0.48171   0.48173   0.48298   0.48530
     Eigenvalues ---    0.49149   0.49772   0.52865   0.56237   0.58655
     Eigenvalues ---    0.59708   0.978341000.000001000.000001000.00000
     Eigenvalues --- 1000.000001000.000001000.000001000.000001000.00000
     Eigenvalues --- 1000.000001000.000001000.000001000.000001000.00000
     Eigenvalues --- 1000.000001000.000001000.000001000.000001000.00000
     Eigenvalues --- 1000.000001000.000001000.000001000.000001000.00000
     Eigenvalues --- 1000.000001000.000001000.000001000.000001000.00000
     Eigenvalues --- 1000.000001000.000001000.000001000.000001000.00000
     Eigenvalues --- 1000.000001000.000001000.000001000.000001000.00000
     Eigenvalues --- 1000.000001000.000001000.000001000.000001000.00000
     Eigenvalues --- 1000.000001000.000001000.000001000.000001000.00000
     Eigenvalues --- 1000.000001000.000001000.000001000.000001000.00000
     Eigenvalues --- 1000.000001000.000001000.000001000.000001000.00000
     Eigenvalues --- 1000.000001000.000001000.000001000.000001000.00000
     Eigenvalues --- 1000.000001000.000001000.000001000.000001000.00000
     Eigenvalues --- 1000.000001000.000001000.000001000.000001000.00000
     Eigenvalues --- 1000.000001000.000001000.000001000.000001000.00000
     Eigenvalues --- 1000.000001000.000001000.000001000.000001000.00000
     Eigenvalues --- 1000.000001000.000001000.000001000.000001000.00000
     Eigenvalues --- 1000.000001000.000001000.000001000.000001000.00000
     Eigenvalues --- 1000.000001000.000001000.000001000.000001000.00000
     Eigenvalues --- 1000.000001000.000001000.000001000.000001000.00000
     Eigenvalues --- 1000.000001000.000001000.000001000.000001000.00000
     Eigenvalues --- 1000.000001000.000001000.000001000.000001000.00000
     Eigenvalues --- 1000.000001000.000001000.000001000.000001000.00000
     Eigenvalues --- 1000.000001000.000001000.000001000.000001000.00000
     Eigenvalues --- 1000.000001000.000001000.00000
 RFO step:  Lambda=-1.87482192D-07.
 Quartic linear search produced a step of  0.30568.
 Iteration  1 RMS(Cart)=  0.00275446 RMS(Int)=  0.00000271
 Iteration  2 RMS(Cart)=  0.00000537 RMS(Int)=  0.00000001
 Iteration  3 RMS(Cart)=  0.00000000 RMS(Int)=  0.00000001
 Variable       Old X    -DE/DX   Delta X   Delta X   Delta X     New X
                                 (Linear)    (Quad)   (Total)
    R1        2.61270  -0.00001   0.00000  -0.00002  -0.00002   2.61268
    R2        2.66994   0.00000  -0.00001   0.00002   0.00001   2.66995
    R3        2.05113   0.00000   0.00001   0.00000   0.00001   2.05114
    R4        2.65871  -0.00001   0.00004  -0.00003   0.00001   2.65872
    R5        2.05017   0.00000   0.00002   0.00000   0.00002   2.05019
    R6        2.64554   0.00000  -0.00001   0.00001   0.00000   2.64554
    R7        2.57171   0.00006  -0.00006   0.00009   0.00003   2.57174
    R8        2.63419  -0.00002   0.00005  -0.00004   0.00001   2.63420
    R9        2.04661   0.00000   0.00002  -0.00001   0.00001   2.04662
   R10        2.65359   0.00000  -0.00005   0.00002  -0.00003   2.65356
   R11        2.05348   0.00000   0.00001   0.00000   0.00001   2.05350
   R12        2.75377  -0.00003   0.00010  -0.00010   0.00000   2.75376
   R13        2.70276  -0.00004  -0.00014  -0.00004  -0.00018   2.70259
   R14        2.55013   0.00000  -0.00004   0.00002  -0.00002   2.55011
   R15        2.05828   0.00000   0.00000   0.00000   0.00000   2.05828
   R16        2.80114  -0.00001   0.00014  -0.00006   0.00007   2.80121
   R17        2.04873   0.00000  -0.00001   0.00000  -0.00001   2.04872
   R18        2.82882  -0.00002   0.00008  -0.00004   0.00004   2.82886
   R19        2.32897   0.00001  -0.00012   0.00006  -0.00006   2.32891
   R20        2.64939   0.00000   0.00000   0.00003   0.00003   2.64942
   R21        2.65928  -0.00002  -0.00003  -0.00001  -0.00004   2.65924
   R22        2.62859  -0.00001   0.00002  -0.00004  -0.00002   2.62857
   R23        2.04972   0.00000   0.00001  -0.00001   0.00000   2.04972
   R24        2.65127   0.00001   0.00002   0.00002   0.00004   2.65131
   R25        2.04707   0.00000   0.00002  -0.00001   0.00001   2.04708
   R26        2.65218  -0.00001   0.00003  -0.00004  -0.00001   2.65217
   R27        2.57225   0.00003  -0.00009   0.00005  -0.00004   2.57221
   R28        2.62098  -0.00001   0.00001  -0.00001   0.00000   2.62098
   R29        2.05003   0.00000   0.00001   0.00000   0.00002   2.05005
   R30        2.04926   0.00001   0.00001   0.00000   0.00001   2.04926
   R31        2.70240  -0.00006  -0.00015  -0.00011  -0.00026   2.70214
   R32        2.85118  -0.00001   0.00008  -0.00008   0.00000   2.85118
   R33        2.07914   0.00002   0.00003   0.00002   0.00005   2.07920
   R34        2.07496   0.00002   0.00004   0.00003   0.00006   2.07502
   R35        2.64659   0.00000   0.00000   0.00002   0.00001   2.64660
   R36        2.64206  -0.00001  -0.00001  -0.00002  -0.00003   2.64203
   R37        2.63367  -0.00001   0.00000  -0.00002  -0.00001   2.63366
   R38        2.05095   0.00000   0.00001   0.00000   0.00002   2.05096
   R39        2.63998   0.00000   0.00001   0.00000   0.00001   2.63999
   R40        2.05255   0.00000   0.00001   0.00000   0.00001   2.05256
   R41        2.63546  -0.00001  -0.00001   0.00000  -0.00001   2.63545
   R42        2.05228   0.00000   0.00001   0.00000   0.00001   2.05229
   R43        2.63813   0.00000   0.00002  -0.00001   0.00002   2.63815
   R44        2.05232   0.00000   0.00001   0.00000   0.00001   2.05233
   R45        2.05459   0.00000   0.00001   0.00000   0.00001   2.05460
   R46        2.85168  -0.00001   0.00009  -0.00007   0.00002   2.85170
   R47        2.07897   0.00002   0.00003   0.00003   0.00007   2.07903
   R48        2.07475   0.00002   0.00004   0.00004   0.00008   2.07483
   R49        2.64216   0.00000   0.00000   0.00001   0.00001   2.64217
   R50        2.64646  -0.00001  -0.00002  -0.00002  -0.00003   2.64642
   R51        2.63807  -0.00001   0.00001  -0.00003  -0.00002   2.63805
   R52        2.05462   0.00000   0.00001   0.00000   0.00001   2.05464
   R53        2.63553   0.00000   0.00000   0.00002   0.00002   2.63555
   R54        2.05236   0.00000   0.00002   0.00000   0.00001   2.05237
   R55        2.63990  -0.00001   0.00000  -0.00002  -0.00002   2.63988
   R56        2.05232   0.00000   0.00001   0.00000   0.00001   2.05233
   R57        2.63382   0.00000   0.00001   0.00001   0.00003   2.63385
   R58        2.05259   0.00000   0.00001   0.00000   0.00001   2.05261
   R59        2.05080   0.00000   0.00001  -0.00001   0.00000   2.05079
    A1        2.11735   0.00000   0.00000   0.00002   0.00002   2.11736
    A2        2.07375   0.00000  -0.00002   0.00001   0.00000   2.07375
    A3        2.09208  -0.00001   0.00002  -0.00003  -0.00001   2.09207
    A4        2.10024   0.00000   0.00002  -0.00002   0.00000   2.10024
    A5        2.11781   0.00000  -0.00001   0.00002   0.00001   2.11782
    A6        2.06514   0.00000  -0.00001   0.00000  -0.00001   2.06512
    A7        2.08611   0.00000  -0.00005   0.00003  -0.00002   2.08609
    A8        2.01615  -0.00002   0.00004  -0.00007  -0.00003   2.01612
    A9        2.18092   0.00002   0.00001   0.00005   0.00006   2.18098
   A10        2.08333   0.00000   0.00002  -0.00001   0.00002   2.08334
   A11        2.11544   0.00000   0.00000   0.00000   0.00000   2.11544
   A12        2.08442   0.00000  -0.00002   0.00001  -0.00002   2.08440
   A13        2.13159   0.00000   0.00000   0.00000   0.00000   2.13159
   A14        2.07612   0.00000  -0.00006   0.00000  -0.00006   2.07606
   A15        2.07548   0.00000   0.00006  -0.00001   0.00005   2.07553
   A16        2.04775  -0.00001   0.00000  -0.00002  -0.00001   2.04774
   A17        2.15934   0.00000  -0.00001   0.00000  -0.00001   2.15933
   A18        2.07609   0.00001   0.00000   0.00002   0.00002   2.07612
   A19        2.07102   0.00001   0.00009  -0.00003   0.00006   2.07108
   A20        2.23956   0.00001  -0.00002   0.00003   0.00001   2.23958
   A21        2.02590   0.00000  -0.00012   0.00007  -0.00005   2.02586
   A22        2.01772  -0.00001   0.00013  -0.00010   0.00003   2.01775
   A23        2.09382   0.00000  -0.00006   0.00000  -0.00006   2.09376
   A24        2.11203   0.00001   0.00000   0.00000   0.00000   2.11203
   A25        2.07719  -0.00001   0.00006   0.00001   0.00006   2.07725
   A26        2.08049  -0.00003  -0.00007   0.00002  -0.00005   2.08044
   A27        2.11150   0.00002   0.00001   0.00002   0.00002   2.11152
   A28        2.09115   0.00001   0.00006  -0.00004   0.00003   2.09118
   A29        2.05352   0.00001  -0.00005  -0.00003  -0.00009   2.05343
   A30        2.17129  -0.00002   0.00007   0.00004   0.00011   2.17140
   A31        2.05827   0.00001  -0.00001   0.00000  -0.00002   2.05825
   A32        2.12530   0.00000   0.00001   0.00000   0.00002   2.12531
   A33        2.05501   0.00000   0.00004  -0.00003   0.00001   2.05502
   A34        2.10288   0.00000  -0.00005   0.00003  -0.00002   2.10285
   A35        2.08442   0.00000   0.00002  -0.00002   0.00000   2.08443
   A36        2.08530   0.00001   0.00000   0.00003   0.00003   2.08534
   A37        2.11346   0.00000  -0.00002  -0.00002  -0.00004   2.11342
   A38        2.08780   0.00000  -0.00006   0.00002  -0.00004   2.08776
   A39        2.17737   0.00002   0.00001   0.00003   0.00003   2.17741
   A40        2.01801  -0.00002   0.00005  -0.00005   0.00001   2.01801
   A41        2.09747   0.00000   0.00004   0.00000   0.00003   2.09751
   A42        2.06755   0.00000   0.00001   0.00001   0.00002   2.06757
   A43        2.11816   0.00000  -0.00005   0.00000  -0.00005   2.11811
   A44        2.11306   0.00000   0.00001   0.00000   0.00000   2.11307
   A45        2.10680  -0.00001   0.00005   0.00001   0.00006   2.10686
   A46        2.06314   0.00001  -0.00005  -0.00001  -0.00006   2.06308
   A47        2.07192   0.00001   0.00013  -0.00006   0.00007   2.07199
   A48        1.90110  -0.00001   0.00009  -0.00009  -0.00001   1.90109
   A49        1.90415   0.00000   0.00006   0.00004   0.00009   1.90424
   A50        1.92265   0.00001   0.00004   0.00007   0.00011   1.92276
   A51        1.92888   0.00000  -0.00008   0.00002  -0.00007   1.92881
   A52        1.92840   0.00000  -0.00004   0.00002  -0.00003   1.92837
   A53        1.87857  -0.00001  -0.00005  -0.00005  -0.00010   1.87847
   A54        2.10592  -0.00002  -0.00004  -0.00006  -0.00009   2.10583
   A55        2.09740   0.00001   0.00003   0.00004   0.00007   2.09747
   A56        2.07921   0.00000   0.00000   0.00002   0.00003   2.07923
   A57        2.10043   0.00000   0.00000   0.00000   0.00000   2.10043
   A58        2.08277   0.00000   0.00001  -0.00002  -0.00001   2.08275
   A59        2.09990   0.00000  -0.00001   0.00002   0.00001   2.09991
   A60        2.09848   0.00000   0.00000  -0.00002  -0.00002   2.09845
   A61        2.08978   0.00000   0.00000   0.00002   0.00002   2.08981
   A62        2.09493   0.00000   0.00000   0.00000   0.00000   2.09492
   A63        2.08926   0.00000   0.00000   0.00002   0.00002   2.08928
   A64        2.09681   0.00000   0.00000  -0.00002  -0.00002   2.09680
   A65        2.09710   0.00000   0.00000   0.00000   0.00000   2.09710
   A66        2.09467   0.00000   0.00000   0.00000   0.00000   2.09467
   A67        2.09765   0.00000   0.00001   0.00000   0.00001   2.09766
   A68        2.09083   0.00000  -0.00001  -0.00001  -0.00001   2.09081
   A69        2.10427   0.00000   0.00000  -0.00002  -0.00002   2.10425
   A70        2.08879   0.00000   0.00001  -0.00001   0.00001   2.08880
   A71        2.09012   0.00000  -0.00001   0.00003   0.00002   2.09013
   A72        1.90113   0.00000   0.00012  -0.00002   0.00010   1.90123
   A73        1.90465   0.00001   0.00008   0.00006   0.00013   1.90478
[truncated: 535,861 more chars]
