# Supplementary material for: Substitution effect on chalcone based materials for corrosion and photocrosslinking applications
Source: Royal Society of Chemistry journal article supplement (doi:10.1039/c4ra10884a), 2014-11-19
Supplement: c4ra10884a3.out [file c4ra10884a3.out]

 Entering Link 1 = C:\G09W\l1.exe PID=      1696.
  
 Copyright (c) 1988,1990,1992,1993,1995,1998,2003,2009, Gaussian, Inc.
                  All Rights Reserved.
  
 This is part of the Gaussian(R) 09 program.  It is based on
 the Gaussian(R) 03 system (copyright 2003, Gaussian, Inc.),
 the Gaussian(R) 98 system (copyright 1998, Gaussian, Inc.),
 the Gaussian(R) 94 system (copyright 1995, Gaussian, Inc.),
 the Gaussian 92(TM) system (copyright 1992, Gaussian, Inc.),
 the Gaussian 90(TM) system (copyright 1990, Gaussian, Inc.),
 the Gaussian 88(TM) system (copyright 1988, Gaussian, Inc.),
 the Gaussian 86(TM) system (copyright 1986, Carnegie Mellon
 University), and the Gaussian 82(TM) system (copyright 1983,
 Carnegie Mellon University). Gaussian is a federally registered
 trademark of Gaussian, Inc.
  
 This software contains proprietary and confidential information,
 including trade secrets, belonging to Gaussian, Inc.
  
 This software is provided under written license and may be
 used, copied, transmitted, or stored only in accord with that
 written license.
  
 The following legend is applicable only to US Government
 contracts under FAR:
  
                    RESTRICTED RIGHTS LEGEND
  
 Use, reproduction and disclosure by the US Government is
 subject to restrictions as set forth in subparagraphs (a)
 and (c) of the Commercial Computer Software - Restricted
 Rights clause in FAR 52.227-19.
  
 Gaussian, Inc.
 340 Quinnipiac St., Bldg. 40, Wallingford CT 06492
  
  
 ---------------------------------------------------------------
 Warning -- This program may not be used in any manner that
 competes with the business of Gaussian, Inc. or will provide
 assistance to any competitor of Gaussian, Inc.  The licensee
 of this program is prohibited from giving any competitor of
 Gaussian, Inc. access to this program.  By using this program,
 the user acknowledges that Gaussian, Inc. is engaged in the
 business of creating and licensing software in the field of
 computational chemistry and represents and warrants to the
 licensee that it is not a competitor of Gaussian, Inc. and that
 it will not use this program in any manner prohibited above.
 ---------------------------------------------------------------
  

 Cite this work as:
 Gaussian 09, Revision A.02,
 M. J. Frisch, G. W. Trucks, H. B. Schlegel, G. E. Scuseria, 
 M. A. Robb, J. R. Cheeseman, G. Scalmani, V. Barone, B. Mennucci, 
 G. A. Petersson, H. Nakatsuji, M. Caricato, X. Li, H. P. Hratchian, 
 A. F. Izmaylov, J. Bloino, G. Zheng, J. L. Sonnenberg, M. Hada, 
 M. Ehara, K. Toyota, R. Fukuda, J. Hasegawa, M. Ishida, T. Nakajima, 
 Y. Honda, O. Kitao, H. Nakai, T. Vreven, J. A. Montgomery, Jr., 
 J. E. Peralta, F. Ogliaro, M. Bearpark, J. J. Heyd, E. Brothers, 
 K. N. Kudin, V. N. Staroverov, R. Kobayashi, J. Normand, 
 K. Raghavachari, A. Rendell, J. C. Burant, S. S. Iyengar, J. Tomasi, 
 M. Cossi, N. Rega, J. M. Millam, M. Klene, J. E. Knox, J. B. Cross, 
 V. Bakken, C. Adamo, J. Jaramillo, R. Gomperts, R. E. Stratmann, 
 O. Yazyev, A. J. Austin, R. Cammi, C. Pomelli, J. W. Ochterski, 
 R. L. Martin, K. Morokuma, V. G. Zakrzewski, G. A. Voth, 
 P. Salvador, J. J. Dannenberg, S. Dapprich, A. D. Daniels, 
 O. Farkas, J. B. Foresman, J. V. Ortiz, J. Cioslowski, 
 and D. J. Fox, Gaussian, Inc., Wallingford CT, 2009.
 
 ******************************************
 Gaussian 09:  IA32W-G09RevA.02 11-Jun-2009
                24-Jun-2013 
 ******************************************
 %chk=Chalcone-II 24June2013.chk
 ----------------------
 # B3LYP/6-31G(d,p) Opt
 ----------------------
 1/14=-1,18=20,19=15,26=3,38=1/1,3;
 2/9=110,12=2,17=6,18=5,40=1/2;
 3/5=1,6=6,7=101,11=2,16=1,25=1,30=1,71=1,74=-5/1,2,3;
 4//1;
 5/5=2,38=5/2;
 6/7=2,8=2,9=2,10=2,28=1/1;
 7//1,2,3,16;
 1/14=-1,18=20,19=15/3(2);
 2/9=110/2;
 99//99;
 2/9=110/2;
 3/5=1,6=6,7=101,11=2,16=1,25=1,30=1,71=1,74=-5/1,2,3;
 4/5=5,16=3/1;
 5/5=2,38=5/2;
 7//1,2,3,16;
 1/14=-1,18=20,19=15/3(-5);
 2/9=110/2;
 6/7=2,8=2,9=2,10=2,19=2,28=1/1;
 99/9=1/99;
 -------------------
 CHALCONE-II 24 June
 -------------------
 Symbolic Z-matrix:
 Charge =  0 Multiplicity = 1
 C
 C                    1    B1
 C                    2    B2       1    A1
 C                    3    B3       2    A2       1    D1       0
 C                    4    B4       3    A3       2    D2       0
 C                    5    B5       4    A4       3    D3       0
 O                    3    B6       2    A5       1    D4       0
 C                    6    B7       5    A6       4    D5       0
 C                    8    B8       6    A7       5    D6       0
 C                    9    B9       8    A8       6    D7       0
 C                    10   B10      9    A9       8    D8       0
 C                    11   B11      10   A10      9    D9       0
 C                    12   B12      11   A11      10   D10      0
 C                    13   B13      12   A12      11   D11      0
 C                    14   B14      13   A13      12   D12      0
 C                    15   B15      14   A14      13   D13      0
 O                    14   B16      13   A15      12   D14      0
 C                    7    B17      3    A16      2    D15      0
 C                    18   B18      7    A17      3    D16      0
 C                    19   B19      18   A18      7    D17      0
 C                    20   B20      19   A19      18   D18      0
 C                    21   B21      20   A20      19   D19      0
 C                    22   B22      21   A21      20   D20      0
 C                    23   B23      22   A22      21   D21      0
 H                    1    B24      2    A23      3    D22      0
 H                    2    B25      1    A24      6    D23      0
 H                    4    B26      3    A25      2    D24      0
 H                    5    B27      4    A26      3    D25      0
 H                    9    B28      8    A27      6    D26      0
 H                    12   B29      11   A28      10   D27      0
 H                    13   B30      12   A29      11   D28      0
 H                    15   B31      14   A30      13   D29      0
 H                    16   B32      15   A31      14   D30      0
 H                    17   B33      14   A32      13   D31      0
 H                    18   B34      7    A33      3    D32      0
 H                    18   B35      7    A34      3    D33      0
 H                    20   B36      19   A35      18   D34      0
 H                    21   B37      20   A36      19   D35      0
 H                    22   B38      21   A37      20   D36      0
 H                    23   B39      22   A38      21   D37      0
 H                    24   B40      23   A39      22   D38      0
 O                    8    B41      6    A40      5    D39      0
 H                    10   B42      9    A41      8    D40      0
       Variables:
  B1                    1.38247                  
  B2                    1.4069                   
  B3                    1.4                      
  B4                    1.39397                  
  B5                    1.40427                  
  B6                    1.3608                   
  B7                    1.45716                  
  B8                    1.34953                  
  B9                    1.4819                   
  B10                   1.49726                  
  B11                   1.40468                  
  B12                   1.38756                  
  B13                   1.40186                  
  B14                   1.39948                  
  B15                   1.38973                  
  B16                   1.36204                  
  B17                   1.43007                  
  B18                   1.50885                  
  B19                   1.40043                  
  B20                   1.39374                  
  B21                   1.39697                  
  B22                   1.39462                  
  B23                   1.39602                  
  B24                   1.08539                  
  B25                   1.08491                  
  B26                   1.08309                  
  B27                   1.08665                  
  B28                   1.08395                  
  B29                   1.08447                  
  B30                   1.08822                  
  B31                   1.08467                  
  B32                   1.08422                  
  B33                   0.9666                   
  B34                   1.09798                  
  B35                   1.10031                  
  B36                   1.08528                  
  B37                   1.08616                  
  B38                   1.08602                  
  B39                   1.08604                  
  B40                   1.08726                  
  B41                   1.23                     
  B42                   1.07                     
  A1                  120.33533                  
  A2                  119.54179                  
  A3                  119.34488                  
  A4                  122.13987                  
  A5                  115.50134                  
  A6                  118.98211                  
  A7                  128.25312                  
  A8                  119.98357                  
  A9                  119.31898                  
  A10                 117.44984                  
  A11                 121.30672                  
  A12                 119.76818                  
  A13                 119.8864                   
  A14                 119.721                    
  A15                 122.64518                  
  A16                 118.67395                  
  A17                 108.91385                  
  A18                 120.69801                  
  A19                 120.34145                  
  A20                 120.23694                  
  A21                 119.70571                  
  A22                 120.0149                   
  A23                 118.80076                  
  A24                 121.34955                  
  A25                 121.2003                   
  A26                 118.94752                  
  A27                 120.89778                  
  A28                 117.79892                  
  A29                 120.30993                  
  A30                 118.90605                  
  A31                 118.05127                  
  A32                 109.20106                  
  A33                 110.17893                  
  A34                 109.09404                  
  A35                 119.34181                  
  A36                 119.73647                  
  A37                 120.14325                  
  A38                 120.18911                  
  A39                 119.76346                  
  A40                 116.10822                  
  A41                 120.34051                  
  D1                    0.04544                  
  D2                   -0.08718                  
  D3                    0.08317                  
  D4                  179.78707                  
  D5                  179.93008                  
  D6                 -179.50562                  
  D7                 -179.65431                  
  D8                 -177.46096                  
  D9                 -173.90949                  
  D10                -179.78918                  
  D11                   0.29988                  
  D12                   0.05437                  
  D13                  -0.28182                  
  D14                 179.96693                  
  D15                 178.4965                   
  D16                -177.4683                   
  D17                  43.83309                  
  D18                 177.88351                  
  D19                  -0.45142                  
  D20                   0.38043                  
  D21                   0.1229                   
  D22                 179.97409                  
  D23                 179.94545                  
  D24                 179.776                    
  D25                -179.98544                  
  D26                  -0.41843                  
  D27                   0.20208                  
  D28                -179.73863                  
  D29                 179.58092                  
  D30                 179.34109                  
  D31                  -0.05485                  
  D32                  61.26559                  
  D33                 -56.68021                  
  D34                  -3.01285                  
  D35                 179.62647                  
  D36                -179.8876                   
  D37                 179.52103                  
  D38                 179.25948                  
  D39                   0.47444                  
  D40                   2.53904                  
 

 GradGradGradGradGradGradGradGradGradGradGradGradGradGradGradGradGradGrad
 Berny optimization.
 Initialization pass.
                           ----------------------------
                           !    Initial Parameters    !
                           ! (Angstroms and Degrees)  !
 --------------------------                            --------------------------
 ! Name  Definition              Value          Derivative Info.                !
 --------------------------------------------------------------------------------
 ! R1    R(1,2)                  1.3825         estimate D2E/DX2                !
 ! R2    R(1,6)                  1.4129         estimate D2E/DX2                !
 ! R3    R(1,25)                 1.0854         estimate D2E/DX2                !
 ! R4    R(2,3)                  1.4069         estimate D2E/DX2                !
 ! R5    R(2,26)                 1.0849         estimate D2E/DX2                !
 ! R6    R(3,4)                  1.4            estimate D2E/DX2                !
 ! R7    R(3,7)                  1.3608         estimate D2E/DX2                !
 ! R8    R(4,5)                  1.394          estimate D2E/DX2                !
 ! R9    R(4,27)                 1.0831         estimate D2E/DX2                !
 ! R10   R(5,6)                  1.4043         estimate D2E/DX2                !
 ! R11   R(5,28)                 1.0867         estimate D2E/DX2                !
 ! R12   R(6,8)                  1.4572         estimate D2E/DX2                !
 ! R13   R(7,18)                 1.4301         estimate D2E/DX2                !
 ! R14   R(8,9)                  1.3495         estimate D2E/DX2                !
 ! R15   R(8,42)                 1.23           estimate D2E/DX2                !
 ! R16   R(9,10)                 1.4819         estimate D2E/DX2                !
 ! R17   R(9,29)                 1.084          estimate D2E/DX2                !
 ! R18   R(10,11)                1.4973         estimate D2E/DX2                !
 ! R19   R(10,43)                1.07           estimate D2E/DX2                !
 ! R20   R(11,12)                1.4047         estimate D2E/DX2                !
 ! R21   R(11,16)                1.4058         estimate D2E/DX2                !
 ! R22   R(12,13)                1.3876         estimate D2E/DX2                !
 ! R23   R(12,30)                1.0845         estimate D2E/DX2                !
 ! R24   R(13,14)                1.4019         estimate D2E/DX2                !
 ! R25   R(13,31)                1.0882         estimate D2E/DX2                !
 ! R26   R(14,15)                1.3995         estimate D2E/DX2                !
 ! R27   R(14,17)                1.362          estimate D2E/DX2                !
 ! R28   R(15,16)                1.3897         estimate D2E/DX2                !
 ! R29   R(15,32)                1.0847         estimate D2E/DX2                !
 ! R30   R(16,33)                1.0842         estimate D2E/DX2                !
 ! R31   R(17,34)                0.9666         estimate D2E/DX2                !
 ! R32   R(18,19)                1.5089         estimate D2E/DX2                !
 ! R33   R(18,35)                1.098          estimate D2E/DX2                !
 ! R34   R(18,36)                1.1003         estimate D2E/DX2                !
 ! R35   R(19,20)                1.4004         estimate D2E/DX2                !
 ! R36   R(19,24)                1.3982         estimate D2E/DX2                !
 ! R37   R(20,21)                1.3937         estimate D2E/DX2                !
 ! R38   R(20,37)                1.0853         estimate D2E/DX2                !
 ! R39   R(21,22)                1.397          estimate D2E/DX2                !
 ! R40   R(21,38)                1.0862         estimate D2E/DX2                !
 ! R41   R(22,23)                1.3946         estimate D2E/DX2                !
 ! R42   R(22,39)                1.086          estimate D2E/DX2                !
 ! R43   R(23,24)                1.396          estimate D2E/DX2                !
 ! R44   R(23,40)                1.086          estimate D2E/DX2                !
 ! R45   R(24,41)                1.0873         estimate D2E/DX2                !
 ! A1    A(2,1,6)              121.309          estimate D2E/DX2                !
 ! A2    A(2,1,25)             118.8008         estimate D2E/DX2                !
 ! A3    A(6,1,25)             119.8902         estimate D2E/DX2                !
 ! A4    A(1,2,3)              120.3353         estimate D2E/DX2                !
 ! A5    A(1,2,26)             121.3496         estimate D2E/DX2                !
 ! A6    A(3,2,26)             118.3151         estimate D2E/DX2                !
 ! A7    A(2,3,4)              119.5418         estimate D2E/DX2                !
 ! A8    A(2,3,7)              115.5013         estimate D2E/DX2                !
 ! A9    A(4,3,7)              124.9563         estimate D2E/DX2                !
 ! A10   A(3,4,5)              119.3449         estimate D2E/DX2                !
 ! A11   A(3,4,27)             121.2003         estimate D2E/DX2                !
 ! A12   A(5,4,27)             119.4547         estimate D2E/DX2                !
 ! A13   A(4,5,6)              122.1399         estimate D2E/DX2                !
 ! A14   A(4,5,28)             118.9475         estimate D2E/DX2                !
 ! A15   A(6,5,28)             118.9126         estimate D2E/DX2                !
 ! A16   A(1,6,5)              117.3291         estimate D2E/DX2                !
 ! A17   A(1,6,8)              123.6888         estimate D2E/DX2                !
 ! A18   A(5,6,8)              118.9821         estimate D2E/DX2                !
 ! A19   A(3,7,18)             118.6739         estimate D2E/DX2                !
 ! A20   A(6,8,9)              128.2531         estimate D2E/DX2                !
 ! A21   A(6,8,42)             116.1082         estimate D2E/DX2                !
 ! A22   A(9,8,42)             115.6387         estimate D2E/DX2                !
 ! A23   A(8,9,10)             119.9836         estimate D2E/DX2                !
 ! A24   A(8,9,29)             120.8978         estimate D2E/DX2                !
 ! A25   A(10,9,29)            119.1143         estimate D2E/DX2                !
 ! A26   A(9,10,11)            119.319          estimate D2E/DX2                !
 ! A27   A(9,10,43)            120.3405         estimate D2E/DX2                !
 ! A28   A(11,10,43)           120.3405         estimate D2E/DX2                !
 ! A29   A(10,11,12)           117.4498         estimate D2E/DX2                !
 ! A30   A(10,11,16)           124.5109         estimate D2E/DX2                !
 ! A31   A(12,11,16)           118.0361         estimate D2E/DX2                !
 ! A32   A(11,12,13)           121.3067         estimate D2E/DX2                !
 ! A33   A(11,12,30)           117.7989         estimate D2E/DX2                !
 ! A34   A(13,12,30)           120.8944         estimate D2E/DX2                !
 ! A35   A(12,13,14)           119.7682         estimate D2E/DX2                !
 ! A36   A(12,13,31)           120.3099         estimate D2E/DX2                !
 ! A37   A(14,13,31)           119.9219         estimate D2E/DX2                !
 ! A38   A(13,14,15)           119.8864         estimate D2E/DX2                !
 ! A39   A(13,14,17)           122.6452         estimate D2E/DX2                !
 ! A40   A(15,14,17)           117.4684         estimate D2E/DX2                !
 ! A41   A(14,15,16)           119.721          estimate D2E/DX2                !
 ! A42   A(14,15,32)           118.9061         estimate D2E/DX2                !
 ! A43   A(16,15,32)           121.3728         estimate D2E/DX2                !
 ! A44   A(11,16,15)           121.2801         estimate D2E/DX2                !
 ! A45   A(11,16,33)           120.6634         estimate D2E/DX2                !
 ! A46   A(15,16,33)           118.0513         estimate D2E/DX2                !
 ! A47   A(14,17,34)           109.2011         estimate D2E/DX2                !
 ! A48   A(7,18,19)            108.9139         estimate D2E/DX2                !
 ! A49   A(7,18,35)            110.1789         estimate D2E/DX2                !
 ! A50   A(7,18,36)            109.094          estimate D2E/DX2                !
 ! A51   A(19,18,35)           110.4285         estimate D2E/DX2                !
 ! A52   A(19,18,36)           110.5823         estimate D2E/DX2                !
 ! A53   A(35,18,36)           107.6277         estimate D2E/DX2                !
 ! A54   A(18,19,20)           120.698          estimate D2E/DX2                !
 ! A55   A(18,19,24)           120.1348         estimate D2E/DX2                !
 ! A56   A(20,19,24)           119.1327         estimate D2E/DX2                !
 ! A57   A(19,20,21)           120.3414         estimate D2E/DX2                !
 ! A58   A(19,20,37)           119.3418         estimate D2E/DX2                !
 ! A59   A(21,20,37)           120.3106         estimate D2E/DX2                !
 ! A60   A(20,21,22)           120.2369         estimate D2E/DX2                !
 ! A61   A(20,21,38)           119.7365         estimate D2E/DX2                !
 ! A62   A(22,21,38)           120.0265         estimate D2E/DX2                !
 ! A63   A(21,22,23)           119.7057         estimate D2E/DX2                !
 ! A64   A(21,22,39)           120.1432         estimate D2E/DX2                !
 ! A65   A(23,22,39)           120.1505         estimate D2E/DX2                !
 ! A66   A(22,23,24)           120.0149         estimate D2E/DX2                !
 ! A67   A(22,23,40)           120.1891         estimate D2E/DX2                !
 ! A68   A(24,23,40)           119.7933         estimate D2E/DX2                !
 ! A69   A(19,24,23)           120.5649         estimate D2E/DX2                !
 ! A70   A(19,24,41)           119.6714         estimate D2E/DX2                !
 ! A71   A(23,24,41)           119.7635         estimate D2E/DX2                !
 ! D1    D(6,1,2,3)              0.0032         estimate D2E/DX2                !
 ! D2    D(6,1,2,26)           179.9455         estimate D2E/DX2                !
 ! D3    D(25,1,2,3)           179.9741         estimate D2E/DX2                !
 ! D4    D(25,1,2,26)           -0.0837         estimate D2E/DX2                !
 ! D5    D(2,1,6,5)             -0.0091         estimate D2E/DX2                !
 ! D6    D(2,1,6,8)           -179.972          estimate D2E/DX2                !
 ! D7    D(25,1,6,5)          -179.9797         estimate D2E/DX2                !
 ! D8    D(25,1,6,8)             0.0575         estimate D2E/DX2                !
 ! D9    D(1,2,3,4)              0.0454         estimate D2E/DX2                !
 ! D10   D(1,2,3,7)            179.7871         estimate D2E/DX2                !
 ! D11   D(26,2,3,4)          -179.8985         estimate D2E/DX2                !
 ! D12   D(26,2,3,7)            -0.1569         estimate D2E/DX2                !
 ! D13   D(2,3,4,5)             -0.0872         estimate D2E/DX2                !
 ! D14   D(2,3,4,27)           179.776          estimate D2E/DX2                !
 ! D15   D(7,3,4,5)           -179.8027         estimate D2E/DX2                !
 ! D16   D(7,3,4,27)             0.0605         estimate D2E/DX2                !
 ! D17   D(2,3,7,18)           178.4965         estimate D2E/DX2                !
 ! D18   D(4,3,7,18)            -1.7778         estimate D2E/DX2                !
 ! D19   D(3,4,5,6)              0.0832         estimate D2E/DX2                !
 ! D20   D(3,4,5,28)          -179.9854         estimate D2E/DX2                !
 ! D21   D(27,4,5,6)          -179.7824         estimate D2E/DX2                !
 ! D22   D(27,4,5,28)            0.149          estimate D2E/DX2                !
 ! D23   D(4,5,6,1)             -0.0346         estimate D2E/DX2                !
 ! D24   D(4,5,6,8)            179.9301         estimate D2E/DX2                !
 ! D25   D(28,5,6,1)          -179.966          estimate D2E/DX2                !
 ! D26   D(28,5,6,8)            -0.0013         estimate D2E/DX2                !
 ! D27   D(1,6,8,9)              0.4566         estimate D2E/DX2                !
 ! D28   D(1,6,8,42)          -179.5633         estimate D2E/DX2                !
 ! D29   D(5,6,8,9)           -179.5056         estimate D2E/DX2                !
 ! D30   D(5,6,8,42)             0.4744         estimate D2E/DX2                !
 ! D31   D(3,7,18,19)         -177.4683         estimate D2E/DX2                !
 ! D32   D(3,7,18,35)           61.2656         estimate D2E/DX2                !
 ! D33   D(3,7,18,36)          -56.6802         estimate D2E/DX2                !
 ! D34   D(6,8,9,10)          -179.6543         estimate D2E/DX2                !
 ! D35   D(6,8,9,29)            -0.4184         estimate D2E/DX2                !
 ! D36   D(42,8,9,10)            0.3656         estimate D2E/DX2                !
 ! D37   D(42,8,9,29)          179.6014         estimate D2E/DX2                !
 ! D38   D(8,9,10,11)         -177.461          estimate D2E/DX2                !
 ! D39   D(8,9,10,43)            2.539          estimate D2E/DX2                !
 ! D40   D(29,9,10,11)           3.2896         estimate D2E/DX2                !
 ! D41   D(29,9,10,43)        -176.7104         estimate D2E/DX2                !
 ! D42   D(9,10,11,12)        -173.9095         estimate D2E/DX2                !
 ! D43   D(9,10,11,16)           6.7597         estimate D2E/DX2                !
 ! D44   D(43,10,11,12)          6.0905         estimate D2E/DX2                !
 ! D45   D(43,10,11,16)       -173.2403         estimate D2E/DX2                !
 ! D46   D(10,11,12,13)       -179.7892         estimate D2E/DX2                !
 ! D47   D(10,11,12,30)          0.2021         estimate D2E/DX2                !
 ! D48   D(16,11,12,13)         -0.4139         estimate D2E/DX2                !
 ! D49   D(16,11,12,30)        179.5774         estimate D2E/DX2                !
 ! D50   D(10,11,16,15)        179.5084         estimate D2E/DX2                !
 ! D51   D(10,11,16,33)          0.3504         estimate D2E/DX2                !
 ! D52   D(12,11,16,15)          0.1812         estimate D2E/DX2                !
 ! D53   D(12,11,16,33)       -178.9768         estimate D2E/DX2                !
 ! D54   D(11,12,13,14)          0.2999         estimate D2E/DX2                !
 ! D55   D(11,12,13,31)       -179.7386         estimate D2E/DX2                !
 ! D56   D(30,12,13,14)       -179.6911         estimate D2E/DX2                !
 ! D57   D(30,12,13,31)          0.2704         estimate D2E/DX2                !
 ! D58   D(12,13,14,15)          0.0544         estimate D2E/DX2                !
 ! D59   D(12,13,14,17)        179.9669         estimate D2E/DX2                !
 ! D60   D(31,13,14,15)       -179.9073         estimate D2E/DX2                !
 ! D61   D(31,13,14,17)          0.0053         estimate D2E/DX2                !
 ! D62   D(13,14,15,16)         -0.2818         estimate D2E/DX2                !
 ! D63   D(13,14,15,32)        179.5809         estimate D2E/DX2                !
 ! D64   D(17,14,15,16)        179.8012         estimate D2E/DX2                !
 ! D65   D(17,14,15,32)         -0.3361         estimate D2E/DX2                !
 ! D66   D(13,14,17,34)         -0.0548         estimate D2E/DX2                !
 ! D67   D(15,14,17,34)        179.8597         estimate D2E/DX2                !
 ! D68   D(14,15,16,11)          0.1618         estimate D2E/DX2                !
 ! D69   D(14,15,16,33)        179.3411         estimate D2E/DX2                !
 ! D70   D(32,15,16,11)       -179.6974         estimate D2E/DX2                !
 ! D71   D(32,15,16,33)         -0.5182         estimate D2E/DX2                !
 ! D72   D(7,18,19,20)          43.8331         estimate D2E/DX2                !
 ! D73   D(7,18,19,24)        -138.3222         estimate D2E/DX2                !
 ! D74   D(35,18,19,20)        164.9467         estimate D2E/DX2                !
 ! D75   D(35,18,19,24)        -17.2086         estimate D2E/DX2                !
 ! D76   D(36,18,19,20)        -76.0372         estimate D2E/DX2                !
 ! D77   D(36,18,19,24)        101.8075         estimate D2E/DX2                !
 ! D78   D(18,19,20,21)        177.8835         estimate D2E/DX2                !
 ! D79   D(18,19,20,37)         -3.0128         estimate D2E/DX2                !
 ! D80   D(24,19,20,21)          0.0174         estimate D2E/DX2                !
 ! D81   D(24,19,20,37)        179.121          estimate D2E/DX2                !
 ! D82   D(18,19,24,23)       -177.3903         estimate D2E/DX2                !
 ! D83   D(18,19,24,41)          2.7895         estimate D2E/DX2                !
 ! D84   D(20,19,24,23)          0.4881         estimate D2E/DX2                !
 ! D85   D(20,19,24,41)       -179.3321         estimate D2E/DX2                !
 ! D86   D(19,20,21,22)         -0.4514         estimate D2E/DX2                !
 ! D87   D(19,20,21,38)        179.6265         estimate D2E/DX2                !
 ! D88   D(37,20,21,22)       -179.5463         estimate D2E/DX2                !
 ! D89   D(37,20,21,38)          0.5316         estimate D2E/DX2                !
 ! D90   D(20,21,22,23)          0.3804         estimate D2E/DX2                !
 ! D91   D(20,21,22,39)       -179.8876         estimate D2E/DX2                !
 ! D92   D(38,21,22,23)       -179.6977         estimate D2E/DX2                !
 ! D93   D(38,21,22,39)          0.0343         estimate D2E/DX2                !
 ! D94   D(21,22,23,24)          0.1229         estimate D2E/DX2                !
 ! D95   D(21,22,23,40)        179.521          estimate D2E/DX2                !
 ! D96   D(39,22,23,24)       -179.6091         estimate D2E/DX2                !
 ! D97   D(39,22,23,40)         -0.2109         estimate D2E/DX2                !
 ! D98   D(22,23,24,19)         -0.5605         estimate D2E/DX2                !
 ! D99   D(22,23,24,41)        179.2595         estimate D2E/DX2                !
 ! D100  D(40,23,24,19)       -179.961          estimate D2E/DX2                !
 ! D101  D(40,23,24,41)         -0.141          estimate D2E/DX2                !
 --------------------------------------------------------------------------------
 Trust Radius=3.00D-01 FncErr=1.00D-07 GrdErr=1.00D-06
 Number of steps in this run= 227 maximum allowed number of steps= 258.
 GradGradGradGradGradGradGradGradGradGradGradGradGradGradGradGradGradGrad

                          Input orientation:                          
 ---------------------------------------------------------------------
 Center     Atomic      Atomic             Coordinates (Angstroms)
 Number     Number       Type             X           Y           Z
 ---------------------------------------------------------------------
      1          6           0        0.000000    0.000000    0.000000
      2          6           0        0.000000    0.000000    1.382475
      3          6           0        1.214274    0.000000    2.093044
      4          6           0        2.425204    0.000966    1.390446
      5          6           0        2.406278    0.000063   -0.003392
      6          6           0        1.207175   -0.000068   -0.734234
      7          8           0        1.099605    0.004564    3.448998
      8          6           0        1.267682    0.000522   -2.190135
      9          6           0        0.243565    0.009653   -3.068957
     10          6           0        0.517330    0.000734   -4.525322
     11          6           0       -0.628164    0.068867   -5.487088
     12          6           0       -0.335730   -0.073951   -6.853550
     13          6           0       -1.335357   -0.019538   -7.814335
     14          6           0       -2.665624    0.187880   -7.423719
     15          6           0       -2.978740    0.340065   -6.068231
     16          6           0       -1.967932    0.278588   -5.116475
     17          8           0       -3.692106    0.251998   -8.316676
     18          6           0        2.291516   -0.028061    4.238538
     19          6           0        1.910439   -0.079001    5.697584
     20          6           0        0.886373   -0.925668    6.139898
     21          6           0        0.569988   -0.999469    7.495240
     22          6           0        1.278822   -0.235723    8.425702
     23          6           0        2.300745    0.608365    7.991934
     24          6           0        2.609926    0.689492    6.632998
     25          1           0       -0.951125   -0.000430   -0.522902
     26          1           0       -0.926522    0.000934    1.946907
     27          1           0        3.375440    0.004613    1.910185
     28          1           0        3.349940    0.000580   -0.542205
     29          1           0       -0.784564    0.011109   -2.725584
     30          1           0        0.699919   -0.228575   -7.135661
     31          1           0       -1.091031   -0.136440   -8.868313
     32          1           0       -4.012271    0.506639   -5.784355
     33          1           0       -2.239375    0.410869   -4.075148
     34          1           0       -3.343573    0.134955   -9.210628
     35          1           0        2.905934    0.858541    4.033650
     36          1           0        2.882362   -0.914094    3.961902
     37          1           0        0.331623   -1.512927    5.415178
     38          1           0       -0.230169   -1.654883    7.826774
     39          1           0        1.032223   -0.295782    9.481646
     40          1           0        2.851687    1.211456    8.707638
     41          1           0        3.399320    1.357921    6.298033
     42          8           0        2.393667   -0.008039   -2.685094
     43          1           0        1.523278   -0.053835   -4.885865
 ---------------------------------------------------------------------
                    Distance matrix (angstroms):
                    1          2          3          4          5
     1  C    0.000000
     2  C    1.382475   0.000000
     3  C    2.419771   1.406901   0.000000
     4  C    2.795524   2.425217   1.399999   0.000000
     5  C    2.406280   2.776833   2.411621   1.393967   0.000000
     6  C    1.412930   2.436746   2.827287   2.449053   1.404271
     7  O    3.620046   2.340869   1.360801   2.448440   3.691397
     8  C    2.530555   3.790852   4.283512   3.763033   2.465410
     9  C    3.078622   4.458101   5.252487   4.964464   3.751680
    10  C    4.554796   5.930404   6.654960   6.215810   4.900609
    11  C    5.523357   6.898567   7.801136   7.525168   6.267654
    12  C    6.862167   8.243197   9.080172   8.694357   7.378940
    13  C    7.927634   9.293270  10.230208   9.943351   8.660891
    14  C    7.890022   9.202711  10.278992  10.180421   8.990033
    15  C    6.768453   8.031285   9.181689   9.216803   8.117652
    16  C    5.488961   6.796081   7.885507   7.856001   6.734605
    17  O    9.102871  10.381170  11.510792  11.476617  10.313314
    18  C    4.818406   3.661821   2.400913   2.851376   4.243576
    19  C    6.009866   4.719766   3.672002   4.338527   5.723045
    20  C    6.272229   4.927026   4.164301   5.077789   6.395866
    21  C    7.583037   6.220107   5.531525   6.458421   7.784633
    22  C    8.525456   7.162262   6.337372   7.131972   8.507431
    23  C    8.338738   7.024848   6.028883   6.630541   8.019128
    24  C    7.161269   5.903821   4.799420   5.290798   6.675212
    25  H    1.085387   2.129577   3.395898   3.880786   3.397358
    26  H    2.156129   1.084909   2.145778   3.397604   3.861505
    27  H    3.878456   3.416445   2.168893   1.083093   2.145012
    28  H    3.393536   3.863482   3.391992   2.142493   1.086655
    29  H    2.836277   4.182321   5.216766   5.219618   4.194272
    30  H    7.173548   8.549899   9.245853   8.701942   7.337110
    31  H    8.936215  10.309589  11.201982  10.845503   9.530825
    32  H    7.057887   8.229122   9.467147   9.652697   8.652972
    33  H    4.668024   5.913482   7.081179   7.197155   6.191127
    34  H    9.799661  11.109074  12.188732  12.069777  10.855974
    35  H    5.044985   4.026198   2.713809   2.820117   4.157445
    36  H    4.983999   3.974547   2.666593   2.767438   4.097060
    37  H    5.632324   4.319909   3.755608   4.782616   5.996185
    38  H    8.003125   6.657372   6.140090   7.156756   8.426221
    39  H    9.542253   8.170040   7.396761   8.215593   9.588614
    40  H    9.242440   7.953474   6.921098   7.428894   8.806129
    41  H    7.284541   6.128787   4.929534   5.184075   6.522106
    42  O    3.597143   4.719621   4.921548   4.075672   2.681744
    43  H    5.118100   6.450997   6.985954   6.341022   4.961968
                    6          7          8          9         10
     6  C    0.000000
     7  O    4.184617   0.000000
     8  C    1.457158   5.641638   0.000000
     9  C    2.525781   6.573931   1.349529   0.000000
    10  C    3.853340   7.995550   2.452779   1.481899   0.000000
    11  C    5.095375   9.101810   3.803788   2.571143   1.497262
    12  C    6.311263  10.402348   4.931928   3.829585   2.480713
    13  C    7.522810  11.523553   6.197405   5.001245   3.774979
    14  C    7.731953  11.507672   6.549534   5.240142   4.308936
    15  C    6.788895  10.359686   5.760817   4.414528   3.836433
    16  C    5.418763   9.102318   4.371497   3.025785   2.569668
    17  O    9.031054  12.706408   7.886523   6.564053   5.670702
    18  C    5.089700   1.430067   6.509754   7.589138   8.941689
    19  C    6.470634   2.391773   7.914264   8.924045  10.317699
    20  C    6.943582   2.855126   8.390034   9.278525  10.711737
    21  C    8.314389   4.202458   9.761826  10.617304  12.062217
    22  C    9.163247   4.985724  10.618471  11.543792  12.975545
    23  C    8.815447   4.737677  10.252377  11.266489  12.658257
    24  C    7.531222   3.589994   8.951200  10.009485  11.373717
    25  H    2.168622   4.470067   2.775387   2.812434   4.263300
    26  H    3.426541   2.522197   4.682911   5.150541   6.631324
    27  H    3.419700   2.747248   4.610346   5.882221   7.041630
    28  H    2.151352   4.581891   2.655461   4.004264   4.887627
    29  H    2.816491   6.455663   2.120974   1.083954   2.221282
    30  H    6.425557  10.594767   4.983278   4.099157   2.626745
    31  H    8.453614  12.511391   7.083809   5.952732   4.633273
    32  H    7.280323  10.565896   6.407221   5.072723   4.728466
    33  H    4.817602   8.241762   4.002638   2.708946   2.823171
    34  H    9.621684  13.417338   8.400540   7.113605   6.072618
    35  H    5.133781   2.081807   6.492732   7.632552   8.927332
    36  H    5.069062   2.070079   6.425829   7.566343   8.857949
    37  H    6.393012   2.599700   7.810731   8.620124  10.056798
    38  H    8.837151   4.866928  10.262670  11.032319  12.484954
    39  H   10.221657   6.040497  11.677916  12.579067  14.019564
    40  H    9.660287   5.672713  11.078668  12.121667  13.491712
    41  H    7.490154   3.903494   8.856377   9.975827  11.282412
    42  O    2.283349   6.269118   1.230000   2.184171   2.628146
    43  H    4.163994   8.345828   2.708365   2.223252   1.070000
                   11         12         13         14         15
    11  C    0.000000
    12  C    1.404682   0.000000
    13  C    2.433929   1.387559   0.000000
    14  C    2.813529   2.412893   1.401861   0.000000
    15  C    2.436489   2.788124   2.424644   1.399482   0.000000
    16  C    1.405815   2.409522   2.787019   2.412130   1.389730
    17  O    4.174667   3.675900   2.424943   1.362039   2.360541
    18  C   10.154887  11.399077  12.586740  12.673914  11.581908
    19  C   11.470104  12.750541  13.896427  13.898927  12.748102
    20  C   11.767316  13.078557  14.159017  14.065147  12.867772
    21  C   13.081199  14.407106  15.458774  15.311901  14.083876
    22  C   14.046177  15.365171  16.450515  16.338366  15.117289
    23  C   13.804116  15.093209  16.231255  16.201357  15.021091
    24  C   12.560529  13.825582  14.993112  15.022461  13.880796
    25  H    4.975164   6.360914   7.301575   7.113103   5.914206
    26  H    7.440291   8.820584   9.769822   9.532474   8.280643
    27  H    8.411458   9.517458  10.805484  11.119793  10.205060
    28  H    6.346799   7.309091   8.650797   9.142064   8.408591
    29  H    2.766533   4.153167   5.118564   5.063804   4.011971
    30  H    2.137771   1.084465   2.155607   3.403424   3.872375
    31  H    3.418929   2.152592   1.088224   2.161337   3.410420
    32  H    3.425229   3.872624   3.400522   2.145362   1.084675
    33  H    2.169457   3.402710   3.870919   3.382948   2.126982
    34  H    4.608965   3.827085   2.450803   1.911926   3.170147
    35  H   10.186162  11.397765  12.614845  12.757874  11.702401
    36  H   10.127854  11.315298  12.540699  12.713255  11.684562
    37  H   11.058149  12.370840  13.417490  13.293362  12.093831
    38  H   13.430884  14.765582  15.765154  15.553287  14.304042
    39  H   15.064955  16.393876  17.459459  17.311827  16.071428
    40  H   14.659643  15.936200  17.088659  17.079493  15.908472
    41  H   12.520838  13.746454  14.949029  15.047890  13.951349
    42  O    4.121717   4.982969   6.341519   6.934650   6.358423
    43  H    2.237237   2.707047   4.092543   4.903675   4.671328
                   16         17         18         19         20
    16  C    0.000000
    17  O    3.635212   0.000000
    18  C   10.283638  13.910988   0.000000
    19  C   11.494065  15.096277   1.508851   0.000000
    20  C   11.674897  15.209928   2.528892   1.400428   0.000000
    21  C   12.927871  16.424017   3.809646   2.423971   1.393736
    22  C   13.935440  17.471554   4.312889   2.804661   2.419699
    23  C   13.789879  17.378494   3.806981   2.426696   2.789937
    24  C   12.616487  16.229596   2.519862   1.398164   2.412991
    25  H    4.713032   8.265568   5.760798   6.847567   6.973189
    26  H    7.145138  10.632622   3.950719   4.703437   4.661153
    27  H    8.831798  12.433829   2.568499   4.061725   4.995132
    28  H    7.020043  10.492666   4.896589   6.404176   7.181754
    29  H    2.681095   6.306516   7.613330   8.844259   9.070079
    30  H    3.384044   4.573362  11.486766  12.891079  13.295155
    31  H    3.875241   2.687151  13.536725  14.872037  15.158476
    32  H    2.162728   2.565150  11.852512  12.932765  12.970583
    33  H    1.084224   4.486226   9.478345  10.628605  10.765862
    34  H    4.321470   0.966605  14.582897  15.808391  15.957945
    35  H   10.383435  14.015441   1.097976   2.153758   3.420279
    36  H   10.361698  13.976655   1.100309   2.157453   2.954280
    37  H   10.927634  14.417668   2.725892   2.151408   1.085283
    38  H   13.201736  16.620234   4.677700   3.405738   2.150342
    39  H   14.914288  18.422802   5.398859   3.890679   3.403721
    40  H   14.669870  18.263873   4.671514   3.407587   3.875958
    41  H   12.659516  16.281926   2.718399   2.154541   3.399219
    42  O    5.001731   8.295720   6.924415   8.396895   8.999692
    43  H    3.514575   6.250139   9.156723  10.590558  11.078501
                   21         22         23         24         25
    21  C    0.000000
    22  C    1.396965   0.000000
    23  C    2.413991   1.394620   0.000000
    24  C    2.785211   2.416950   1.396024   0.000000
    25  H    8.222072   9.225266   9.134973   8.022717   0.000000
    26  H    5.833039   6.847943   6.879431   5.911009   2.469932
    27  H    6.330212   6.848761   6.205414   4.833222   4.963779
    28  H    8.563221   9.206993   8.619846   7.246086   4.301109
    29  H   10.359600  11.343264  11.168753   9.978267   2.209000
    30  H   14.651772  15.572128  15.235066  13.930791   6.819573
    31  H   16.470267  17.455916  17.214146  15.958380   8.347692
    32  H   14.128451  15.181320  15.154230  14.074004   6.108243
    33  H   11.989807  13.002578  12.894424  11.758306   3.800949
    34  H   17.195608  18.235791  18.111063  16.934348   9.012143
    35  H    4.570716   4.809888   4.012089   2.621604   6.031326
    36  H    4.223605   4.791350   4.347105   3.127373   5.970249
    37  H    2.155718   3.404657   3.875177   3.394761   6.260501
    38  H    1.086155   2.156336   3.399278   3.871348   8.542487
    39  H    2.157463   1.086019   2.155428   3.402162  10.203523
    40  H    3.400624   2.155856   1.086042   2.152911  10.056486
    41  H    3.872429   3.400468   2.153602   1.087263   8.203453
    42  O   10.389800  11.168908  10.695211   9.346666   3.982809
    43  H   12.453704  13.315053  12.918230  11.593858   5.016071
                   26         27         28         29         30
    26  H    0.000000
    27  H    4.302120   0.000000
    28  H    4.948112   2.452526   0.000000
    29  H    4.674658   6.228646   4.675616   0.000000
    30  H    9.229899   9.436107   7.109767   4.659390   0.000000
    31  H   10.817344  11.668131   9.437430   6.152139   2.493607
    32  H    8.339665  10.678776   9.051983   4.474341   4.956945
    33  H    6.177118   8.216776   6.624989   2.024255   4.291279
    34  H   11.417123  12.993638  10.952751   6.972781   4.559328
    35  H    4.447213   2.336393   4.676717   7.747590  11.436862
    36  H    4.405119   2.301454   4.619766   7.682761  11.330882
    37  H    3.987932   4.883925   6.847726   8.357066  12.621757
    38  H    6.148127   7.124631   9.251894  10.697436  15.059013
    39  H    7.790829   7.931452  10.292582  12.345500  16.620765
    40  H    7.838858   6.923594   9.342059  12.057434  16.053470
    41  H    6.283837   4.591865   6.973784  10.037153  13.793762
    42  O    5.699050   4.699003   2.346595   3.178547   4.767070
    43  H    7.258877   7.044162   4.712434   3.161830   2.402090
                   31         32         33         34         35
    31  H    0.000000
    32  H    4.296276   0.000000
    33  H    4.959100   2.464492   0.000000
    34  H    2.294511   3.510648   5.260089   0.000000
    35  H   13.543499  12.015766   9.613908  14.662565   0.000000
    36  H   13.453885  12.022645   9.621949  14.607475   1.774243
    37  H   14.420012  12.181034  10.018847  15.170259   3.762918
    38  H   16.786086  14.291232  12.245815  17.411774   5.526321
    39  H   18.473078  16.097876  13.963860  19.202454   5.875706
    40  H   18.063109  16.050812  13.782579  18.989586   4.687606
    41  H   15.887555  14.200016  11.844606  16.955259   2.370705
    42  O    7.098718   7.134869   4.855184   8.690165   6.793740
    43  H    4.764591   5.635931   3.876954   6.513483   9.072040
                   36         37         38         39         40
    36  H    0.000000
    37  H    2.996144   0.000000
    38  H    5.017354   2.480234   0.000000
    39  H    5.854306   4.302145   2.485838   0.000000
    40  H    5.200087   4.961177   4.299960   2.486223   0.000000
    41  H    3.299515   4.293246   4.958550   4.298054   2.475389
    42  O    6.726241   8.493004  10.958831  12.246057  11.466965
    43  H    8.992783  10.471889  12.932483  14.377936  13.716740
                   41         42         43
    41  H    0.000000
    42  O    9.141869   0.000000
    43  H   11.427693   2.367079   0.000000
 Stoichiometry    C22H18O3
 Framework group  C1[X(C22H18O3)]
 Deg. of freedom   123
 Full point group                 C1      NOp   1
 Largest Abelian subgroup         C1      NOp   1
 Largest concise Abelian subgroup C1      NOp   1
                         Standard orientation:                         
 ---------------------------------------------------------------------
 Center     Atomic      Atomic             Coordinates (Angstroms)
 Number     Number       Type             X           Y           Z
 ---------------------------------------------------------------------
      1          6           0        0.123771   -0.473217    0.023970
      2          6           0        1.462531   -0.815703    0.064726
      3          6           0        2.452899    0.182866    0.027298
      4          6           0        2.073937    1.528342   -0.050667
      5          6           0        0.719476    1.855287   -0.091749
      6          6           0       -0.286745    0.876409   -0.055779
      7          8           0        3.737356   -0.263727    0.077342
      8          6           0       -1.681557    1.295647   -0.101020
      9          6           0       -2.787674    0.523196   -0.068577
     10          6           0       -4.129691    1.148328   -0.133578
     11          6           0       -5.347325    0.282194   -0.038837
     12          6           0       -6.595411    0.895895   -0.235770
     13          6           0       -7.775554    0.169880   -0.161712
     14          6           0       -7.731876   -1.202515    0.120845
     15          6           0       -6.499721   -1.832999    0.327801
     16          6           0       -5.325420   -1.094313    0.245886
     17          8           0       -8.853184   -1.970788    0.207884
     18          6           0        4.799174    0.691888    0.010743
     19          6           0        6.118069   -0.040939    0.021218
     20          6           0        6.305538   -1.186754   -0.761829
     21          6           0        7.540492   -1.832543   -0.780346
     22          6           0        8.605297   -1.336214   -0.024461
     23          6           0        8.425613   -0.194730    0.756366
     24          6           0        7.185264    0.445377    0.782437
     25          1           0       -0.619352   -1.263749    0.053851
     26          1           0        1.778462   -1.851732    0.126842
     27          1           0        2.813722    2.318971   -0.077386
     28          1           0        0.432597    2.901628   -0.152485
     29          1           0       -2.711113   -0.556328   -0.007572
     30          1           0       -6.608230    1.959263   -0.448255
     31          1           0       -8.733444    0.661030   -0.321246
     32          1           0       -6.484864   -2.894111    0.552167
     33          1           0       -4.386787   -1.607730    0.421705
     34          1           0       -9.630165   -1.418488    0.047917
     35          1           0        4.738986    1.384771    0.860356
     36          1           0        4.693079    1.284210   -0.910440
     37          1           0        5.475394   -1.575490   -1.342848
     38          1           0        7.673245   -2.724012   -1.386475
     39          1           0        9.567464   -1.839587   -0.041440
     40          1           0        9.245815    0.193410    1.353110
     41          1           0        7.046293    1.327986    1.401977
     42          8           0       -1.880433    2.507000   -0.178291
     43          1           0       -4.227519    2.207787   -0.247050
 ---------------------------------------------------------------------
 Rotational constants (GHZ):      0.8914940      0.0498297      0.0475798
 Standard basis: 6-31G(d,p) (6D, 7F)
 There are   465 symmetry adapted basis functions of A   symmetry.
 Integral buffers will be    262144 words long.
 Raffenetti 2 integral format.
 Two-electron integral symmetry is turned on.
   465 basis functions,   826 primitive gaussians,   465 cartesian basis functions
    87 alpha electrons       87 beta electrons
       nuclear repulsion energy      1779.0158831506 Hartrees.
 NAtoms=   43 NActive=   43 NUniq=   43 SFac= 7.50D-01 NAtFMM=   80 NAOKFM=F Big=F
 One-electron integrals computed using PRISM.
 NBasis=   465 RedAO= T  NBF=   465
 NBsUse=   465 1.00D-06 NBFU=   465
 Harris functional with IExCor=  402 diagonalized for initial guess.
 ExpMin= 1.61D-01 ExpMax= 5.48D+03 ExpMxC= 8.25D+02 IAcc=1 IRadAn=         1 AccDes= 0.00D+00
 HarFok:  IExCor=  402 AccDes= 0.00D+00 IRadAn=         1 IDoV= 1
 ScaDFX=  1.000000  1.000000  1.000000  1.000000
 FoFCou: FMM=F IPFlag=           0 FMFlag=      100000 FMFlg1=           0
         NFxFlg=           0 DoJE=T BraDBF=F KetDBF=T FulRan=T
         Omega=  0.000000  0.000000  1.000000  0.000000  0.000000 ICntrl=     500 IOpCl=  0
         NMat0=    1 NMatS0=    1 NMatT0=    0 NMatD0=    1 NMtDS0=    0 NMtDT0=    0
         I1Cent=           4 NGrid=           0.
 Petite list used in FoFCou.
 Initial guess orbital symmetries:
       Occupied  (A) (A) (A) (A) (A) (A) (A) (A) (A) (A) (A) (A)
                 (A) (A) (A) (A) (A) (A) (A) (A) (A) (A) (A) (A)
                 (A) (A) (A) (A) (A) (A) (A) (A) (A) (A) (A) (A)
                 (A) (A) (A) (A) (A) (A) (A) (A) (A) (A) (A) (A)
                 (A) (A) (A) (A) (A) (A) (A) (A) (A) (A) (A) (A)
                 (A) (A) (A) (A) (A) (A) (A) (A) (A) (A) (A) (A)
                 (A) (A) (A) (A) (A) (A) (A) (A) (A) (A) (A) (A)
                 (A) (A) (A)
       Virtual   (A) (A) (A) (A) (A) (A) (A) (A) (A) (A) (A) (A)
                 (A) (A) (A) (A) (A) (A) (A) (A) (A) (A) (A) (A)
                 (A) (A) (A) (A) (A) (A) (A) (A) (A) (A) (A) (A)
                 (A) (A) (A) (A) (A) (A) (A) (A) (A) (A) (A) (A)
                 (A) (A) (A) (A) (A) (A) (A) (A) (A) (A) (A) (A)
                 (A) (A) (A) (A) (A) (A) (A) (A) (A) (A) (A) (A)
                 (A) (A) (A) (A) (A) (A) (A) (A) (A) (A) (A) (A)
                 (A) (A) (A) (A) (A) (A) (A) (A) (A) (A) (A) (A)
                 (A) (A) (A) (A) (A) (A) (A) (A) (A) (A) (A) (A)
                 (A) (A) (A) (A) (A) (A) (A) (A) (A) (A) (A) (A)
                 (A) (A) (A) (A) (A) (A) (A) (A) (A) (A) (A) (A)
                 (A) (A) (A) (A) (A) (A) (A) (A) (A) (A) (A) (A)
                 (A) (A) (A) (A) (A) (A) (A) (A) (A) (A) (A) (A)
                 (A) (A) (A) (A) (A) (A) (A) (A) (A) (A) (A) (A)
                 (A) (A) (A) (A) (A) (A) (A) (A) (A) (A) (A) (A)
                 (A) (A) (A) (A) (A) (A) (A) (A) (A) (A) (A) (A)
                 (A) (A) (A) (A) (A) (A) (A) (A) (A) (A) (A) (A)
                 (A) (A) (A) (A) (A) (A) (A) (A) (A) (A) (A) (A)
                 (A) (A) (A) (A) (A) (A) (A) (A) (A) (A) (A) (A)
                 (A) (A) (A) (A) (A) (A) (A) (A) (A) (A) (A) (A)
                 (A) (A) (A) (A) (A) (A) (A) (A) (A) (A) (A) (A)
                 (A) (A) (A) (A) (A) (A) (A) (A) (A) (A) (A) (A)
                 (A) (A) (A) (A) (A) (A) (A) (A) (A) (A) (A) (A)
                 (A) (A) (A) (A) (A) (A) (A) (A) (A) (A) (A) (A)
                 (A) (A) (A) (A) (A) (A) (A) (A) (A) (A) (A) (A)
                 (A) (A) (A) (A) (A) (A) (A) (A) (A) (A) (A) (A)
                 (A) (A) (A) (A) (A) (A) (A) (A) (A) (A) (A) (A)
                 (A) (A) (A) (A) (A) (A) (A) (A) (A) (A) (A) (A)
                 (A) (A) (A) (A) (A) (A) (A) (A) (A) (A) (A) (A)
                 (A) (A) (A) (A) (A) (A) (A) (A) (A) (A) (A) (A)
                 (A) (A) (A) (A) (A) (A) (A) (A) (A) (A) (A) (A)
                 (A) (A) (A) (A) (A) (A)
 The electronic state of the initial guess is 1-A.
 Requested convergence on RMS density matrix=1.00D-08 within 128 cycles.
 Requested convergence on MAX density matrix=1.00D-06.
 Requested convergence on             energy=1.00D-06.
 No special actions if energy rises.
 Integral accuracy reduced to 1.0D-05 until final iterations.
 Initial convergence to 1.0D-05 achieved.  Increase integral accuracy.
 SCF Done:  E(RB3LYP) =  -1074.82908136     A.U. after   17 cycles
             Convg  =    0.8171D-08             -V/T =  2.0094

 **********************************************************************

            Population analysis using the SCF density.

 **********************************************************************

 Orbital symmetries:
       Occupied  (A) (A) (A) (A) (A) (A) (A) (A) (A) (A) (A) (A)
                 (A) (A) (A) (A) (A) (A) (A) (A) (A) (A) (A) (A)
                 (A) (A) (A) (A) (A) (A) (A) (A) (A) (A) (A) (A)
                 (A) (A) (A) (A) (A) (A) (A) (A) (A) (A) (A) (A)
                 (A) (A) (A) (A) (A) (A) (A) (A) (A) (A) (A) (A)
                 (A) (A) (A) (A) (A) (A) (A) (A) (A) (A) (A) (A)
                 (A) (A) (A) (A) (A) (A) (A) (A) (A) (A) (A) (A)
                 (A) (A) (A)
       Virtual   (A) (A) (A) (A) (A) (A) (A) (A) (A) (A) (A) (A)
                 (A) (A) (A) (A) (A) (A) (A) (A) (A) (A) (A) (A)
                 (A) (A) (A) (A) (A) (A) (A) (A) (A) (A) (A) (A)
                 (A) (A) (A) (A) (A) (A) (A) (A) (A) (A) (A) (A)
                 (A) (A) (A) (A) (A) (A) (A) (A) (A) (A) (A) (A)
                 (A) (A) (A) (A) (A) (A) (A) (A) (A) (A) (A) (A)
                 (A) (A) (A) (A) (A) (A) (A) (A) (A) (A) (A) (A)
                 (A) (A) (A) (A) (A) (A) (A) (A) (A) (A) (A) (A)
                 (A) (A) (A) (A) (A) (A) (A) (A) (A) (A) (A) (A)
                 (A) (A) (A) (A) (A) (A) (A) (A) (A) (A) (A) (A)
                 (A) (A) (A) (A) (A) (A) (A) (A) (A) (A) (A) (A)
                 (A) (A) (A) (A) (A) (A) (A) (A) (A) (A) (A) (A)
                 (A) (A) (A) (A) (A) (A) (A) (A) (A) (A) (A) (A)
                 (A) (A) (A) (A) (A) (A) (A) (A) (A) (A) (A) (A)
                 (A) (A) (A) (A) (A) (A) (A) (A) (A) (A) (A) (A)
                 (A) (A) (A) (A) (A) (A) (A) (A) (A) (A) (A) (A)
                 (A) (A) (A) (A) (A) (A) (A) (A) (A) (A) (A) (A)
                 (A) (A) (A) (A) (A) (A) (A) (A) (A) (A) (A) (A)
                 (A) (A) (A) (A) (A) (A) (A) (A) (A) (A) (A) (A)
                 (A) (A) (A) (A) (A) (A) (A) (A) (A) (A) (A) (A)
                 (A) (A) (A) (A) (A) (A) (A) (A) (A) (A) (A) (A)
                 (A) (A) (A) (A) (A) (A) (A) (A) (A) (A) (A) (A)
                 (A) (A) (A) (A) (A) (A) (A) (A) (A) (A) (A) (A)
                 (A) (A) (A) (A) (A) (A) (A) (A) (A) (A) (A) (A)
                 (A) (A) (A) (A) (A) (A) (A) (A) (A) (A) (A) (A)
                 (A) (A) (A) (A) (A) (A) (A) (A) (A) (A) (A) (A)
                 (A) (A) (A) (A) (A) (A) (A) (A) (A) (A) (A) (A)
                 (A) (A) (A) (A) (A) (A) (A) (A) (A) (A) (A) (A)
                 (A) (A) (A) (A) (A) (A) (A) (A) (A) (A) (A) (A)
                 (A) (A) (A) (A) (A) (A) (A) (A) (A) (A) (A) (A)
                 (A) (A) (A) (A) (A) (A) (A) (A) (A) (A) (A) (A)
                 (A) (A) (A) (A) (A) (A)
 The electronic state is 1-A.
 Alpha  occ. eigenvalues --  -19.19468 -19.18351 -19.08842 -10.26599 -10.25298
 Alpha  occ. eigenvalues --  -10.25163 -10.23343 -10.22210 -10.20627 -10.20526
 Alpha  occ. eigenvalues --  -10.20471 -10.20291 -10.20143 -10.19845 -10.19410
 Alpha  occ. eigenvalues --  -10.19408 -10.19305 -10.19247 -10.19191 -10.19049
 Alpha  occ. eigenvalues --  -10.18800 -10.18719 -10.18527 -10.18525 -10.18225
 Alpha  occ. eigenvalues --   -1.07571  -1.06988  -1.00627  -0.86585  -0.86023
 Alpha  occ. eigenvalues --   -0.84826  -0.78635  -0.78228  -0.76211  -0.75317
 Alpha  occ. eigenvalues --   -0.74663  -0.74422  -0.72849  -0.69160  -0.66198
 Alpha  occ. eigenvalues --   -0.63263  -0.61554  -0.60982  -0.60420  -0.58630
 Alpha  occ. eigenvalues --   -0.58067  -0.55782  -0.53940  -0.52566  -0.51733
 Alpha  occ. eigenvalues --   -0.50217  -0.48770  -0.48278  -0.47432  -0.46872
 Alpha  occ. eigenvalues --   -0.45515  -0.44249  -0.44005  -0.43703  -0.43319
 Alpha  occ. eigenvalues --   -0.42212  -0.42098  -0.42028  -0.41786  -0.40801
 Alpha  occ. eigenvalues --   -0.40385  -0.39755  -0.38724  -0.37614  -0.37410
 Alpha  occ. eigenvalues --   -0.36105  -0.35932  -0.35693  -0.35437  -0.34580
 Alpha  occ. eigenvalues --   -0.34376  -0.34172  -0.32248  -0.31278  -0.26967
 Alpha  occ. eigenvalues --   -0.26525  -0.25284  -0.25239  -0.24801  -0.22161
 Alpha  occ. eigenvalues --   -0.21846  -0.20753
 Alpha virt. eigenvalues --   -0.07919  -0.01477  -0.00923  -0.00589  -0.00341
 Alpha virt. eigenvalues --    0.00194   0.03687   0.05846   0.08495   0.09151
 Alpha virt. eigenvalues --    0.09541   0.10477   0.11137   0.11601   0.12816
 Alpha virt. eigenvalues --    0.13684   0.14617   0.14974   0.15452   0.15784
 Alpha virt. eigenvalues --    0.16436   0.16686   0.17836   0.18432   0.18787
 Alpha virt. eigenvalues --    0.18994   0.19792   0.20227   0.21100   0.21995
 Alpha virt. eigenvalues --    0.22922   0.23793   0.24910   0.25932   0.26820
 Alpha virt. eigenvalues --    0.28430   0.30200   0.30446   0.31117   0.31737
 Alpha virt. eigenvalues --    0.32461   0.32943   0.33831   0.33978   0.36469
 Alpha virt. eigenvalues --    0.36806   0.38391   0.39411   0.43618   0.44360
 Alpha virt. eigenvalues --    0.46162   0.48279   0.49358   0.50056   0.50630
 Alpha virt. eigenvalues --    0.51610   0.52432   0.52892   0.53217   0.53989
 Alpha virt. eigenvalues --    0.54359   0.54583   0.55087   0.55925   0.56352
 Alpha virt. eigenvalues --    0.56919   0.57292   0.57562   0.57796   0.58066
 Alpha virt. eigenvalues --    0.58187   0.58573   0.59035   0.59364   0.59597
 Alpha virt. eigenvalues --    0.59727   0.60015   0.60730   0.61086   0.61209
 Alpha virt. eigenvalues --    0.61447   0.61761   0.62020   0.62317   0.63389
 Alpha virt. eigenvalues --    0.63909   0.64985   0.65477   0.65879   0.65980
 Alpha virt. eigenvalues --    0.66584   0.67611   0.69183   0.70204   0.71401
 Alpha virt. eigenvalues --    0.72269   0.72754   0.74108   0.75238   0.76413
 Alpha virt. eigenvalues --    0.77705   0.78343   0.79277   0.80260   0.80470
 Alpha virt. eigenvalues --    0.81286   0.81444   0.81833   0.82460   0.82621
 Alpha virt. eigenvalues --    0.83677   0.84206   0.84970   0.85305   0.85997
 Alpha virt. eigenvalues --    0.86360   0.86919   0.87821   0.87992   0.89375
 Alpha virt. eigenvalues --    0.89916   0.90837   0.92980   0.93214   0.93921
 Alpha virt. eigenvalues --    0.94121   0.94421   0.95853   0.96442   0.97616
 Alpha virt. eigenvalues --    0.98203   0.98781   0.99674   1.00287   1.02849
 Alpha virt. eigenvalues --    1.03617   1.05154   1.05788   1.06388   1.07988
 Alpha virt. eigenvalues --    1.09210   1.10457   1.11323   1.12174   1.14276
 Alpha virt. eigenvalues --    1.14791   1.15705   1.17103   1.17815   1.18931
 Alpha virt. eigenvalues --    1.19206   1.21728   1.21966   1.22790   1.23934
 Alpha virt. eigenvalues --    1.25321   1.26021   1.26364   1.26790   1.28491
 Alpha virt. eigenvalues --    1.29516   1.32319   1.32864   1.33103   1.34005
 Alpha virt. eigenvalues --    1.35757   1.36603   1.37083   1.38388   1.39017
 Alpha virt. eigenvalues --    1.40107   1.40332   1.40357   1.40591   1.41052
 Alpha virt. eigenvalues --    1.41305   1.41479   1.41720   1.42390   1.42868
 Alpha virt. eigenvalues --    1.45821   1.46754   1.47341   1.48989   1.49824
 Alpha virt. eigenvalues --    1.52282   1.56940   1.57647   1.58510   1.66181
 Alpha virt. eigenvalues --    1.68506   1.70424   1.71062   1.73540   1.75305
 Alpha virt. eigenvalues --    1.75623   1.76613   1.76960   1.77284   1.78100
 Alpha virt. eigenvalues --    1.79314   1.80421   1.81774   1.83604   1.84892
 Alpha virt. eigenvalues --    1.85626   1.86311   1.87022   1.87341   1.88824
 Alpha virt. eigenvalues --    1.88897   1.89508   1.89631   1.90716   1.91206
 Alpha virt. eigenvalues --    1.91449   1.91876   1.92335   1.92476   1.92714
 Alpha virt. eigenvalues --    1.94031   1.94980   1.95399   1.96403   1.97021
 Alpha virt. eigenvalues --    1.97444   1.97872   1.98523   1.99265   2.00209
 Alpha virt. eigenvalues --    2.00565   2.01016   2.01934   2.05082   2.05675
 Alpha virt. eigenvalues --    2.07826   2.08179   2.08946   2.10753   2.11024
 Alpha virt. eigenvalues --    2.11560   2.12496   2.14548   2.15943   2.20541
 Alpha virt. eigenvalues --    2.23051   2.25639   2.26045   2.26553   2.26834
 Alpha virt. eigenvalues --    2.27783   2.28178   2.29182   2.29725   2.30922
 Alpha virt. eigenvalues --    2.32422   2.33276   2.33711   2.35315   2.36525
 Alpha virt. eigenvalues --    2.37048   2.37573   2.38074   2.39353   2.39522
 Alpha virt. eigenvalues --    2.40388   2.40750   2.40999   2.41363   2.43254
 Alpha virt. eigenvalues --    2.44232   2.44888   2.46925   2.47381   2.48250
 Alpha virt. eigenvalues --    2.48647   2.48856   2.49236   2.49751   2.50341
 Alpha virt. eigenvalues --    2.51342   2.52257   2.52339   2.53717   2.54343
 Alpha virt. eigenvalues --    2.55506   2.56385   2.56909   2.58623   2.59456
 Alpha virt. eigenvalues --    2.59681   2.60079   2.60908   2.61642   2.62607
 Alpha virt. eigenvalues --    2.64180   2.65158   2.65746   2.68442   2.68883
 Alpha virt. eigenvalues --    2.69877   2.71334   2.72689   2.73229   2.73756
 Alpha virt. eigenvalues --    2.74276   2.75992   2.76555   2.78079   2.79358
 Alpha virt. eigenvalues --    2.80326   2.81373   2.82108   2.84214   2.85652
 Alpha virt. eigenvalues --    2.86740   2.87651   2.91784   2.94362   2.96805
 Alpha virt. eigenvalues --    2.98124   2.99591   3.04057   3.05198   3.05931
 Alpha virt. eigenvalues --    3.06777   3.09545   3.12273   3.18443   3.19093
 Alpha virt. eigenvalues --    3.19887   3.22742   3.23564   3.24222   3.24709
 Alpha virt. eigenvalues --    3.26107   3.26465   3.31093   3.34574   3.35378
 Alpha virt. eigenvalues --    3.36807   3.41412   3.42884   3.43649   3.45861
 Alpha virt. eigenvalues --    3.50686   3.50730   3.51049   3.53251   3.58770
 Alpha virt. eigenvalues --    3.82956   3.84982   3.89661   3.98795   4.03941
 Alpha virt. eigenvalues --    4.09293   4.09688   4.13070   4.14381   4.15138
 Alpha virt. eigenvalues --    4.15524   4.16184   4.16644   4.19990   4.27766
 Alpha virt. eigenvalues --    4.33528   4.38119   4.42342   4.43097   4.43471
 Alpha virt. eigenvalues --    4.44160   4.52749   4.54143   4.55743   4.65824
 Alpha virt. eigenvalues --    4.82970   4.83666   4.88849
          Condensed to atoms (all electrons):
              1          2          3          4          5          6
     1  C    4.959167   0.514673  -0.023400  -0.038598  -0.080442   0.492361
     2  C    0.514673   4.932266   0.532926  -0.060655  -0.038400  -0.021231
     3  C   -0.023400   0.532926   4.547884   0.457305  -0.005259  -0.031310
     4  C   -0.038598  -0.060655   0.457305   5.086274   0.434702  -0.031397
     5  C   -0.080442  -0.038400  -0.005259   0.434702   4.996113   0.468624
     6  C    0.492361  -0.021231  -0.031310  -0.031397   0.468624   5.143521
     7  O    0.003270  -0.053927   0.269166  -0.058284   0.003566   0.000128
     8  C   -0.036565   0.005053   0.000395   0.007000  -0.023259   0.269581
     9  C   -0.015117  -0.000071  -0.000013  -0.000146   0.017502  -0.139906
    10  C   -0.000118   0.000001   0.000000   0.000000  -0.000272   0.011072
    11  C    0.000000   0.000000   0.000000   0.000000  -0.000002  -0.000053
    12  C    0.000000   0.000000   0.000000   0.000000   0.000000  -0.000001
    13  C    0.000000   0.000000   0.000000   0.000000   0.000000   0.000000
    14  C    0.000000   0.000000   0.000000   0.000000   0.000000   0.000000
    15  C    0.000000   0.000000   0.000000   0.000000   0.000000   0.000000
    16  C   -0.000001   0.000000   0.000000   0.000000   0.000000   0.000010
    17  O    0.000000   0.000000   0.000000   0.000000   0.000000   0.000000
    18  C   -0.000097   0.003217  -0.030585  -0.006776   0.000344  -0.000007
    19  C    0.000003  -0.000154   0.002746   0.000782  -0.000008   0.000000
    20  C    0.000000  -0.000080   0.000335   0.000023   0.000000   0.000000
    21  C    0.000000   0.000000  -0.000002   0.000000   0.000000   0.000000
    22  C    0.000000   0.000000   0.000000   0.000000   0.000000   0.000000
    23  C    0.000000   0.000000   0.000000   0.000000   0.000000   0.000000
    24  C    0.000000   0.000004   0.000019  -0.000011   0.000000   0.000000
    25  H    0.359125  -0.041204   0.004320   0.000206   0.006567  -0.038028
    26  H   -0.036072   0.355541  -0.037023   0.007071   0.000250   0.003440
    27  H    0.000783   0.004227  -0.047921   0.366532  -0.031874   0.003143
    28  H    0.006055   0.000429   0.003380  -0.039910   0.362432  -0.039023
    29  H    0.004166   0.000223   0.000000  -0.000001  -0.000633  -0.008047
    30  H    0.000000   0.000000   0.000000   0.000000   0.000000   0.000000
    31  H    0.000000   0.000000   0.000000   0.000000   0.000000   0.000000
    32  H    0.000000   0.000000   0.000000   0.000000   0.000000   0.000000
    33  H   -0.000019   0.000000   0.000000   0.000000   0.000000   0.000031
    34  H    0.000000   0.000000   0.000000   0.000000   0.000000   0.000000
    35  H    0.000005  -0.000037  -0.005111   0.004339  -0.000071  -0.000004
    36  H   -0.000005   0.000180  -0.004052   0.004776  -0.000160  -0.000002
    37  H    0.000000  -0.000040   0.000115   0.000029  -0.000001   0.000000
    38  H    0.000000   0.000000   0.000000   0.000000   0.000000   0.000000
    39  H    0.000000   0.000000   0.000000   0.000000   0.000000   0.000000
    40  H    0.000000   0.000000   0.000000   0.000000   0.000000   0.000000
    41  H    0.000000   0.000000  -0.000003   0.000002   0.000000   0.000000
    42  O    0.005014  -0.000083  -0.000014   0.001615  -0.001181  -0.118178
    43  H   -0.000014   0.000000   0.000000   0.000000  -0.000011   0.000727
              7          8          9         10         11         12
     1  C    0.003270  -0.036565  -0.015117  -0.000118   0.000000   0.000000
     2  C   -0.053927   0.005053  -0.000071   0.000001   0.000000   0.000000
     3  C    0.269166   0.000395  -0.000013   0.000000   0.000000   0.000000
     4  C   -0.058284   0.007000  -0.000146   0.000000   0.000000   0.000000
     5  C    0.003566  -0.023259   0.017502  -0.000272  -0.000002   0.000000
     6  C    0.000128   0.269581  -0.139906   0.011072  -0.000053  -0.000001
     7  O    8.265892   0.000000   0.000000   0.000000   0.000000   0.000000
     8  C    0.000000   4.533363   0.270816  -0.000411   0.005497  -0.000317
     9  C    0.000000   0.270816   5.484411   0.464749  -0.034565   0.004130
    10  C    0.000000  -0.000411   0.464749   5.048655   0.327972  -0.036196
    11  C    0.000000   0.005497  -0.034565   0.327972   4.755916   0.514239
    12  C    0.000000  -0.000317   0.004130  -0.036196   0.514239   4.950129
    13  C    0.000000   0.000002  -0.000230   0.006776  -0.028253   0.456512
    14  C    0.000000   0.000000   0.000006   0.000379  -0.031874  -0.011283
    15  C    0.000000  -0.000009   0.000084   0.005330  -0.028976  -0.039054
    16  C    0.000000   0.000896  -0.009868  -0.050550   0.522668  -0.053203
    17  O    0.000000   0.000000   0.000000   0.000000   0.000165   0.004704
    18  C    0.206676   0.000000   0.000000   0.000000   0.000000   0.000000
    19  C   -0.043412   0.000000   0.000000   0.000000   0.000000   0.000000
    20  C    0.003553   0.000000   0.000000   0.000000   0.000000   0.000000
    21  C    0.000239   0.000000   0.000000   0.000000   0.000000   0.000000
    22  C    0.000007   0.000000   0.000000   0.000000   0.000000   0.000000
    23  C   -0.000083   0.000000   0.000000   0.000000   0.000000   0.000000
    24  C    0.000820   0.000000   0.000000   0.000000   0.000000   0.000000
    25  H   -0.000063  -0.012510   0.005036  -0.000003  -0.000001   0.000000
    26  H   -0.000192  -0.000140   0.000009   0.000000   0.000000   0.000000
    27  H   -0.007567  -0.000165   0.000002   0.000000   0.000000   0.000000
    28  H   -0.000046  -0.011325   0.001168  -0.000023   0.000000   0.000000
    29  H    0.000000  -0.015705   0.335660  -0.047049  -0.006272   0.000177
    30  H    0.000000   0.000002   0.000231  -0.008766  -0.041357   0.364284
    31  H    0.000000   0.000000   0.000002  -0.000168   0.003277  -0.027367
    32  H    0.000000   0.000000   0.000009  -0.000131   0.003840   0.000285
    33  H    0.000000   0.000179   0.002378  -0.010512  -0.038209   0.005924
    34  H    0.000000   0.000000   0.000000  -0.000001  -0.000043   0.000732
    35  H   -0.032639   0.000000   0.000000   0.000000   0.000000   0.000000
    36  H   -0.038812   0.000000   0.000000   0.000000   0.000000   0.000000
    37  H    0.008704   0.000000   0.000000   0.000000   0.000000   0.000000
    38  H   -0.000001   0.000000   0.000000   0.000000   0.000000   0.000000
    39  H    0.000000   0.000000   0.000000   0.000000   0.000000   0.000000
    40  H    0.000000   0.000000   0.000000   0.000000   0.000000   0.000000
    41  H    0.000059   0.000000   0.000000   0.000000   0.000000   0.000000
    42  O    0.000000   0.607813  -0.162899  -0.003284   0.002062  -0.000043
    43  H    0.000000  -0.006052  -0.042720   0.372104  -0.039066  -0.006276
             13         14         15         16         17         18
     1  C    0.000000   0.000000   0.000000  -0.000001   0.000000  -0.000097
     2  C    0.000000   0.000000   0.000000   0.000000   0.000000   0.003217
     3  C    0.000000   0.000000   0.000000   0.000000   0.000000  -0.030585
     4  C    0.000000   0.000000   0.000000   0.000000   0.000000  -0.006776
     5  C    0.000000   0.000000   0.000000   0.000000   0.000000   0.000344
     6  C    0.000000   0.000000   0.000000   0.000010   0.000000  -0.000007
     7  O    0.000000   0.000000   0.000000   0.000000   0.000000   0.206676
     8  C    0.000002   0.000000  -0.000009   0.000896   0.000000   0.000000
     9  C   -0.000230   0.000006   0.000084  -0.009868   0.000000   0.000000
    10  C    0.006776   0.000379   0.005330  -0.050550   0.000000   0.000000
    11  C   -0.028253  -0.031874  -0.028976   0.522668   0.000165   0.000000
    12  C    0.456512  -0.011283  -0.039054  -0.053203   0.004704   0.000000
    13  C    5.048059   0.497382  -0.061789  -0.040327  -0.062131   0.000000
    14  C    0.497382   4.538594   0.528302  -0.021473   0.275556   0.000000
    15  C   -0.061789   0.528302   4.903765   0.523253  -0.052118   0.000000
    16  C   -0.040327  -0.021473   0.523253   4.892136   0.002982   0.000000
    17  O   -0.062131   0.275556  -0.052118   0.002982   8.090160   0.000000
    18  C    0.000000   0.000000   0.000000   0.000000   0.000000   4.861869
    19  C    0.000000   0.000000   0.000000   0.000000   0.000000   0.357230
    20  C    0.000000   0.000000   0.000000   0.000000   0.000000  -0.062890
    21  C    0.000000   0.000000   0.000000   0.000000   0.000000   0.005914
    22  C    0.000000   0.000000   0.000000   0.000000   0.000000   0.000381
    23  C    0.000000   0.000000   0.000000   0.000000   0.000000   0.006415
    24  C    0.000000   0.000000   0.000000   0.000000   0.000000  -0.048251
    25  H    0.000000   0.000000   0.000000  -0.000009   0.000000   0.000002
    26  H    0.000000   0.000000   0.000000   0.000000   0.000000  -0.000279
    27  H    0.000000   0.000000   0.000000   0.000000   0.000000   0.004271
    28  H    0.000000   0.000000   0.000000   0.000000   0.000000  -0.000006
    29  H    0.000003  -0.000013   0.000173  -0.000191   0.000000   0.000000
    30  H   -0.035805   0.003320   0.000518   0.005657  -0.000051   0.000000
    31  H    0.355490  -0.045834   0.004826   0.000648  -0.006375   0.000000
    32  H    0.006283  -0.036791   0.359643  -0.034963  -0.001376   0.000000
    33  H    0.000361   0.004721  -0.041224   0.364173  -0.000063   0.000000
    34  H   -0.006424  -0.035979   0.006350  -0.000167   0.297404   0.000000
    35  H    0.000000   0.000000   0.000000   0.000000   0.000000   0.360633
    36  H    0.000000   0.000000   0.000000   0.000000   0.000000   0.356885
    37  H    0.000000   0.000000   0.000000   0.000000   0.000000  -0.010789
    38  H    0.000000   0.000000   0.000000   0.000000   0.000000  -0.000192
    39  H    0.000000   0.000000   0.000000   0.000000   0.000000   0.000007
    40  H    0.000000   0.000000   0.000000   0.000000   0.000000  -0.000181
    41  H    0.000000   0.000000   0.000000   0.000000   0.000000  -0.010844
    42  O    0.000000   0.000000   0.000000   0.000010   0.000000   0.000000
    43  H    0.000204  -0.000003  -0.000091   0.004065   0.000000   0.000000
             19         20         21         22         23         24
     1  C    0.000003   0.000000   0.000000   0.000000   0.000000   0.000000
     2  C   -0.000154  -0.000080   0.000000   0.000000   0.000000   0.000004
     3  C    0.002746   0.000335  -0.000002   0.000000   0.000000   0.000019
     4  C    0.000782   0.000023   0.000000   0.000000   0.000000  -0.000011
     5  C   -0.000008   0.000000   0.000000   0.000000   0.000000   0.000000
     6  C    0.000000   0.000000   0.000000   0.000000   0.000000   0.000000
     7  O   -0.043412   0.003553   0.000239   0.000007  -0.000083   0.000820
     8  C    0.000000   0.000000   0.000000   0.000000   0.000000   0.000000
     9  C    0.000000   0.000000   0.000000   0.000000   0.000000   0.000000
    10  C    0.000000   0.000000   0.000000   0.000000   0.000000   0.000000
    11  C    0.000000   0.000000   0.000000   0.000000   0.000000   0.000000
    12  C    0.000000   0.000000   0.000000   0.000000   0.000000   0.000000
    13  C    0.000000   0.000000   0.000000   0.000000   0.000000   0.000000
    14  C    0.000000   0.000000   0.000000   0.000000   0.000000   0.000000
    15  C    0.000000   0.000000   0.000000   0.000000   0.000000   0.000000
    16  C    0.000000   0.000000   0.000000   0.000000   0.000000   0.000000
    17  O    0.000000   0.000000   0.000000   0.000000   0.000000   0.000000
    18  C    0.357230  -0.062890   0.005914   0.000381   0.006415  -0.048251
    19  C    4.758992   0.528563  -0.023510  -0.034367  -0.023639   0.544203
    20  C    0.528563   4.883120   0.522384  -0.038613  -0.046037  -0.037575
    21  C   -0.023510   0.522384   4.827440   0.543353  -0.029314  -0.045751
    22  C   -0.034367  -0.038613   0.543353   4.804651   0.551457  -0.040418
    23  C   -0.023639  -0.046037  -0.029314   0.551457   4.817388   0.522090
    24  C    0.544203  -0.037575  -0.045751  -0.040418   0.522090   4.890026
    25  H    0.000000   0.000000   0.000000   0.000000   0.000000   0.000000
    26  H   -0.000022   0.000010   0.000000   0.000000   0.000000   0.000000
    27  H    0.000204   0.000000   0.000000   0.000000   0.000000   0.000004
    28  H    0.000000   0.000000   0.000000   0.000000   0.000000   0.000000
    29  H    0.000000   0.000000   0.000000   0.000000   0.000000   0.000000
    30  H    0.000000   0.000000   0.000000   0.000000   0.000000   0.000000
    31  H    0.000000   0.000000   0.000000   0.000000   0.000000   0.000000
    32  H    0.000000   0.000000   0.000000   0.000000   0.000000   0.000000
    33  H    0.000000   0.000000   0.000000   0.000000   0.000000   0.000000
    34  H    0.000000   0.000000   0.000000   0.000000   0.000000   0.000000
    35  H   -0.035999   0.006716  -0.000120   0.000004   0.000096  -0.005368
    36  H   -0.025858  -0.007061  -0.000134   0.000039  -0.000318   0.000865
    37  H   -0.045406   0.370118  -0.041929   0.004752   0.000363   0.005774
    38  H    0.003690  -0.038063   0.366932  -0.041479   0.004492   0.000985
    39  H    0.000684   0.004681  -0.041489   0.369050  -0.041497   0.004857
    40  H    0.003890   0.000902   0.004475  -0.041365   0.366378  -0.037596
    41  H   -0.045100   0.006220   0.000358   0.004854  -0.042612   0.364828
    42  O    0.000000   0.000000   0.000000   0.000000   0.000000   0.000000
    43  H    0.000000   0.000000   0.000000   0.000000   0.000000   0.000000
             25         26         27         28         29         30
     1  C    0.359125  -0.036072   0.000783   0.006055   0.004166   0.000000
     2  C   -0.041204   0.355541   0.004227   0.000429   0.000223   0.000000
     3  C    0.004320  -0.037023  -0.047921   0.003380   0.000000   0.000000
     4  C    0.000206   0.007071   0.366532  -0.039910  -0.000001   0.000000
     5  C    0.006567   0.000250  -0.031874   0.362432  -0.000633   0.000000
     6  C   -0.038028   0.003440   0.003143  -0.039023  -0.008047   0.000000
     7  O   -0.000063  -0.000192  -0.007567  -0.000046   0.000000   0.000000
     8  C   -0.012510  -0.000140  -0.000165  -0.011325  -0.015705   0.000002
     9  C    0.005036   0.000009   0.000002   0.001168   0.335660   0.000231
    10  C   -0.000003   0.000000   0.000000  -0.000023  -0.047049  -0.008766
    11  C   -0.000001   0.000000   0.000000   0.000000  -0.006272  -0.041357
    12  C    0.000000   0.000000   0.000000   0.000000   0.000177   0.364284
    13  C    0.000000   0.000000   0.000000   0.000000   0.000003  -0.035805
    14  C    0.000000   0.000000   0.000000   0.000000  -0.000013   0.003320
    15  C    0.000000   0.000000   0.000000   0.000000   0.000173   0.000518
    16  C   -0.000009   0.000000   0.000000   0.000000  -0.000191   0.005657
    17  O    0.000000   0.000000   0.000000   0.000000   0.000000  -0.000051
    18  C    0.000002  -0.000279   0.004271  -0.000006   0.000000   0.000000
    19  C    0.000000  -0.000022   0.000204   0.000000   0.000000   0.000000
    20  C    0.000000   0.000010   0.000000   0.000000   0.000000   0.000000
    21  C    0.000000   0.000000   0.000000   0.000000   0.000000   0.000000
    22  C    0.000000   0.000000   0.000000   0.000000   0.000000   0.000000
    23  C    0.000000   0.000000   0.000000   0.000000   0.000000   0.000000
    24  C    0.000000   0.000000   0.000004   0.000000   0.000000   0.000000
    25  H    0.637700  -0.006592   0.000016  -0.000171   0.002227   0.000000
    26  H   -0.006592   0.619304  -0.000169   0.000016  -0.000003   0.000000
    27  H    0.000016  -0.000169   0.618814  -0.005568   0.000000   0.000000
    28  H   -0.000171   0.000016  -0.005568   0.581099  -0.000034   0.000000
    29  H    0.002227  -0.000003   0.000000  -0.000034   0.649388   0.000006
    30  H    0.000000   0.000000   0.000000   0.000000   0.000006   0.615168
    31  H    0.000000   0.000000   0.000000   0.000000   0.000000  -0.005930
    32  H    0.000000   0.000000   0.000000   0.000000   0.000007   0.000016
    33  H    0.000059   0.000000   0.000000   0.000000   0.002398  -0.000197
    34  H    0.000000   0.000000   0.000000   0.000000   0.000000  -0.000013
    35  H    0.000000   0.000023   0.001592   0.000001   0.000000   0.000000
    36  H    0.000000   0.000034   0.001691   0.000001   0.000000   0.000000
    37  H    0.000000   0.000126   0.000004   0.000000   0.000000   0.000000
    38  H    0.000000   0.000000   0.000000   0.000000   0.000000   0.000000
    39  H    0.000000   0.000000   0.000000   0.000000   0.000000   0.000000
    40  H    0.000000   0.000000   0.000000   0.000000   0.000000   0.000000
    41  H    0.000000   0.000000   0.000005   0.000000   0.000000   0.000000
    42  O   -0.000006   0.000001  -0.000001   0.022266   0.005507  -0.000006
    43  H   -0.000001   0.000000   0.000000  -0.000009   0.004027   0.004800
             31         32         33         34         35         36
     1  C    0.000000   0.000000  -0.000019   0.000000   0.000005  -0.000005
     2  C    0.000000   0.000000   0.000000   0.000000  -0.000037   0.000180
     3  C    0.000000   0.000000   0.000000   0.000000  -0.005111  -0.004052
     4  C    0.000000   0.000000   0.000000   0.000000   0.004339   0.004776
     5  C    0.000000   0.000000   0.000000   0.000000  -0.000071  -0.000160
     6  C    0.000000   0.000000   0.000031   0.000000  -0.000004  -0.000002
     7  O    0.000000   0.000000   0.000000   0.000000  -0.032639  -0.038812
     8  C    0.000000   0.000000   0.000179   0.000000   0.000000   0.000000
     9  C    0.000002   0.000009   0.002378   0.000000   0.000000   0.000000
    10  C   -0.000168  -0.000131  -0.010512  -0.000001   0.000000   0.000000
    11  C    0.003277   0.003840  -0.038209  -0.000043   0.000000   0.000000
    12  C   -0.027367   0.000285   0.005924   0.000732   0.000000   0.000000
    13  C    0.355490   0.006283   0.000361  -0.006424   0.000000   0.000000
    14  C   -0.045834  -0.036791   0.004721  -0.035979   0.000000   0.000000
    15  C    0.004826   0.359643  -0.041224   0.006350   0.000000   0.000000
    16  C    0.000648  -0.034963   0.364173  -0.000167   0.000000   0.000000
    17  O   -0.006375  -0.001376  -0.000063   0.297404   0.000000   0.000000
    18  C    0.000000   0.000000   0.000000   0.000000   0.360633   0.356885
    19  C    0.000000   0.000000   0.000000   0.000000  -0.035999  -0.025858
    20  C    0.000000   0.000000   0.000000   0.000000   0.006716  -0.007061
    21  C    0.000000   0.000000   0.000000   0.000000  -0.000120  -0.000134
    22  C    0.000000   0.000000   0.000000   0.000000   0.000004   0.000039
    23  C    0.000000   0.000000   0.000000   0.000000   0.000096  -0.000318
    24  C    0.000000   0.000000   0.000000   0.000000  -0.005368   0.000865
    25  H    0.000000   0.000000   0.000059   0.000000   0.000000   0.000000
    26  H    0.000000   0.000000   0.000000   0.000000   0.000023   0.000034
    27  H    0.000000   0.000000   0.000000   0.000000   0.001592   0.001691
    28  H    0.000000   0.000000   0.000000   0.000000   0.000001   0.000001
    29  H    0.000000   0.000007   0.002398   0.000000   0.000000   0.000000
    30  H   -0.005930   0.000016  -0.000197  -0.000013   0.000000   0.000000
    31  H    0.632518  -0.000179   0.000016   0.006206   0.000000   0.000000
    32  H   -0.000179   0.605988  -0.006682  -0.000331   0.000000   0.000000
    33  H    0.000016  -0.006682   0.623642   0.000006   0.000000   0.000000
    34  H    0.006206  -0.000331   0.000006   0.410430   0.000000   0.000000
    35  H    0.000000   0.000000   0.000000   0.000000   0.646449  -0.056004
    36  H    0.000000   0.000000   0.000000   0.000000  -0.056004   0.647490
    37  H    0.000000   0.000000   0.000000   0.000000   0.000336   0.000633
    38  H    0.000000   0.000000   0.000000   0.000000   0.000002   0.000001
    39  H    0.000000   0.000000   0.000000   0.000000   0.000000   0.000000
    40  H    0.000000   0.000000   0.000000   0.000000  -0.000006   0.000004
    41  H    0.000000   0.000000   0.000000   0.000000   0.007054   0.000280
    42  O    0.000000   0.000000   0.000003   0.000000   0.000000   0.000000
    43  H   -0.000007   0.000001  -0.000036   0.000000   0.000000   0.000000
             37         38         39         40         41         42
     1  C    0.000000   0.000000   0.000000   0.000000   0.000000   0.005014
     2  C   -0.000040   0.000000   0.000000   0.000000   0.000000  -0.000083
     3  C    0.000115   0.000000   0.000000   0.000000  -0.000003  -0.000014
     4  C    0.000029   0.000000   0.000000   0.000000   0.000002   0.001615
     5  C   -0.000001   0.000000   0.000000   0.000000   0.000000  -0.001181
     6  C    0.000000   0.000000   0.000000   0.000000   0.000000  -0.118178
     7  O    0.008704  -0.000001   0.000000   0.000000   0.000059   0.000000
     8  C    0.000000   0.000000   0.000000   0.000000   0.000000   0.607813
     9  C    0.000000   0.000000   0.000000   0.000000   0.000000  -0.162899
    10  C    0.000000   0.000000   0.000000   0.000000   0.000000  -0.003284
    11  C    0.000000   0.000000   0.000000   0.000000   0.000000   0.002062
    12  C    0.000000   0.000000   0.000000   0.000000   0.000000  -0.000043
    13  C    0.000000   0.000000   0.000000   0.000000   0.000000   0.000000
    14  C    0.000000   0.000000   0.000000   0.000000   0.000000   0.000000
    15  C    0.000000   0.000000   0.000000   0.000000   0.000000   0.000000
    16  C    0.000000   0.000000   0.000000   0.000000   0.000000   0.000010
    17  O    0.000000   0.000000   0.000000   0.000000   0.000000   0.000000
    18  C   -0.010789  -0.000192   0.000007  -0.000181  -0.010844   0.000000
    19  C   -0.045406   0.003690   0.000684   0.003890  -0.045100   0.000000
    20  C    0.370118  -0.038063   0.004681   0.000902   0.006220   0.000000
    21  C   -0.041929   0.366932  -0.041489   0.004475   0.000358   0.000000
    22  C    0.004752  -0.041479   0.369050  -0.041365   0.004854   0.000000
    23  C    0.000363   0.004492  -0.041497   0.366378  -0.042612   0.000000
    24  C    0.005774   0.000985   0.004857  -0.037596   0.364828   0.000000
    25  H    0.000000   0.000000   0.000000   0.000000   0.000000  -0.000006
    26  H    0.000126   0.000000   0.000000   0.000000   0.000000   0.000001
    27  H    0.000004   0.000000   0.000000   0.000000   0.000005  -0.000001
    28  H    0.000000   0.000000   0.000000   0.000000   0.000000   0.022266
    29  H    0.000000   0.000000   0.000000   0.000000   0.000000   0.005507
    30  H    0.000000   0.000000   0.000000   0.000000   0.000000  -0.000006
    31  H    0.000000   0.000000   0.000000   0.000000   0.000000   0.000000
    32  H    0.000000   0.000000   0.000000   0.000000   0.000000   0.000000
    33  H    0.000000   0.000000   0.000000   0.000000   0.000000   0.000003
    34  H    0.000000   0.000000   0.000000   0.000000   0.000000   0.000000
    35  H    0.000336   0.000002   0.000000  -0.000006   0.007054   0.000000
    36  H    0.000633   0.000001   0.000000   0.000004   0.000280   0.000000
    37  H    0.615854  -0.005791  -0.000175   0.000017  -0.000170   0.000000
    38  H   -0.005791   0.626991  -0.006046  -0.000195   0.000017   0.000000
    39  H   -0.000175  -0.006046   0.629125  -0.006105  -0.000185   0.000000
    40  H    0.000017  -0.000195  -0.006105   0.627984  -0.006099   0.000000
    41  H   -0.000170   0.000017  -0.000185  -0.006099   0.639705   0.000000
    42  O    0.000000   0.000000   0.000000   0.000000   0.000000   8.150969
    43  H    0.000000   0.000000   0.000000   0.000000   0.000000   0.019261
             43
     1  C   -0.000014
     2  C    0.000000
     3  C    0.000000
     4  C    0.000000
     5  C   -0.000011
     6  C    0.000727
     7  O    0.000000
     8  C   -0.006052
     9  C   -0.042720
    10  C    0.372104
    11  C   -0.039066
    12  C   -0.006276
    13  C    0.000204
    14  C   -0.000003
    15  C   -0.000091
    16  C    0.004065
    17  O    0.000000
    18  C    0.000000
    19  C    0.000000
    20  C    0.000000
    21  C    0.000000
    22  C    0.000000
    23  C    0.000000
    24  C    0.000000
    25  H   -0.000001
    26  H    0.000000
    27  H    0.000000
    28  H   -0.000009
    29  H    0.004027
    30  H    0.004800
    31  H   -0.000007
    32  H    0.000001
    33  H   -0.000036
    34  H    0.000000
    35  H    0.000000
    36  H    0.000000
    37  H    0.000000
    38  H    0.000000
    39  H    0.000000
    40  H    0.000000
    41  H    0.000000
    42  O    0.019261
    43  H    0.555301
 Mulliken atomic charges:
              1
     1  C   -0.114171
     2  C   -0.132858
     3  C    0.366104
     4  C   -0.134881
     5  C   -0.108528
     6  C    0.034550
     7  O   -0.527055
     8  C    0.405860
     9  C   -0.180659
    10  C   -0.079556
    11  C    0.113036
    12  C   -0.127376
    13  C   -0.136112
    14  C    0.334991
    15  C   -0.108983
    16  C   -0.105746
    17  O   -0.548857
    18  C    0.007055
    19  C    0.076488
    20  C   -0.096306
    21  C   -0.088847
    22  C   -0.082306
    23  C   -0.085181
    24  C   -0.119504
    25  H    0.083328
    26  H    0.094665
    27  H    0.091977
    28  H    0.119268
    29  H    0.073987
    30  H    0.098121
    31  H    0.082878
    32  H    0.104380
    33  H    0.093052
    34  H    0.321829
    35  H    0.108108
    36  H    0.119527
    37  H    0.097476
    38  H    0.088655
    39  H    0.087093
    40  H    0.087897
    41  H    0.081631
    42  O   -0.528825
    43  H    0.133796
 Sum of Mulliken atomic charges =   0.00000
 Mulliken charges with hydrogens summed into heavy atoms:
              1
     1  C   -0.030843
     2  C   -0.038192
     3  C    0.366104
     4  C   -0.042903
     5  C    0.010740
     6  C    0.034550
     7  O   -0.527055
     8  C    0.405860
     9  C   -0.106673
    10  C    0.054240
    11  C    0.113036
    12  C   -0.029255
    13  C   -0.053235
    14  C    0.334991
    15  C   -0.004603
    16  C   -0.012694
    17  O   -0.227027
    18  C    0.234689
    19  C    0.076488
    20  C    0.001170
    21  C   -0.000192
    22  C    0.004787
    23  C    0.002716
    24  C   -0.037873
    42  O   -0.528825
 Sum of Mulliken charges with hydrogens summed into heavy atoms =   0.00000
 Electronic spatial extent (au):  <R**2>=          20634.1872
 Charge=              0.0000 electrons
 Dipole moment (field-independent basis, Debye):
    X=             -1.2644    Y=             -1.2656    Z=             -0.1954  Tot=              1.7996
 Quadrupole moment (field-independent basis, Debye-Ang):
   XX=            -81.8700   YY=           -143.7531   ZZ=           -146.9716
   XY=              1.1756   XZ=              3.2576   YZ=              2.5073
 Traceless Quadrupole moment (field-independent basis, Debye-Ang):
   XX=             42.3282   YY=            -19.5548   ZZ=            -22.7734
   XY=              1.1756   XZ=              3.2576   YZ=              2.5073
 Octapole moment (field-independent basis, Debye-Ang**2):
  XXX=           -356.3718  YYY=            -17.7087  ZZZ=              0.2533  XYY=             32.8961
  XXY=             52.2954  XXZ=             -8.3939  XZZ=              6.9568  YZZ=              0.5911
  YYZ=             -3.1249  XYZ=             24.6452
 Hexadecapole moment (field-independent basis, Debye-Ang**3):
 XXXX=         -19286.3331 YYYY=          -1510.7672 ZZZZ=           -279.3432 XXXY=           -594.1611
 XXXZ=            505.1884 YYYX=             13.1602 YYYZ=              7.9966 ZZZX=             -1.9297
 ZZZY=              4.2007 XXYY=          -4597.2447 XXZZ=          -4550.7803 YYZZ=           -294.3899
 XXYZ=            149.4998 YYXZ=            -32.7088 ZZXY=             18.0611
 N-N= 1.779015883151D+03 E-N=-6.056553431404D+03  KE= 1.064862340355D+03
 Calling FoFJK, ICntrl=      2127 FMM=F ISym2X=0 I1Cent= 0 IOpClX= 0 NMat=1 NMatS=1 NMatT=0.
 ***** Axes restored to original set *****
 -------------------------------------------------------------------
 Center     Atomic                   Forces (Hartrees/Bohr)
 Number     Number              X              Y              Z
 -------------------------------------------------------------------
      1        6           0.003508364    0.000047257   -0.004429737
      2        6           0.000140280   -0.000037229    0.004208558
      3        6          -0.003526342   -0.000027920   -0.000849076
      4        6          -0.001545304   -0.000030800   -0.002800768
      5        6           0.003249082    0.000084106    0.000977370
      6        6          -0.016091261    0.000020793    0.028531265
      7        8           0.000031649   -0.000011600    0.000758252
      8        6           0.073371951   -0.001450318    0.032242858
      9        6          -0.060845262   -0.000556874   -0.133096944
     10        6          -0.072975718    0.003668988    0.079883152
     11        6           0.030680887   -0.002401522    0.012494274
     12        6          -0.001050551    0.000738915    0.000648252
     13        6          -0.000787419   -0.000205440   -0.002579285
     14        6           0.001617767   -0.000796741   -0.003185532
     15        6           0.002872358   -0.000558025    0.003549537
     16        6          -0.007268670    0.001159982   -0.001237844
     17        8           0.000348986    0.000121458    0.000323410
     18        6          -0.000110511    0.000044759   -0.000405700
     19        6           0.000043764   -0.000014699   -0.000116165
     20        6          -0.000024952    0.000011185    0.000065183
     21        6           0.000035350    0.000008623   -0.000009631
     22        6          -0.000005868   -0.000003579    0.000029992
     23        6          -0.000021087   -0.000016888    0.000001390
     24        6          -0.000038719   -0.000034325    0.000059909
     25        1          -0.000703206    0.000010600    0.000241702
     26        1           0.000009570   -0.000008765    0.000241566
     27        1           0.000158798    0.000017707   -0.000176822
     28        1          -0.003355017    0.000011553   -0.001589306
     29        1          -0.001637262    0.000560580   -0.003256321
     30        1           0.000229865   -0.000424647   -0.003372054
     31        1          -0.000109751    0.000095291    0.000119441
     32        1           0.000138232    0.000021136    0.000152572
     33        1           0.000729911    0.000197262   -0.000412969
     34        1          -0.000226128    0.000036421   -0.000118017
     35        1           0.000036109   -0.000066830    0.000058407
     36        1           0.000058824    0.000076488    0.000103609
     37        1           0.000026867    0.000036189   -0.000036717
     38        1          -0.000013525   -0.000025490    0.000014715
     39        1          -0.000005569   -0.000006860    0.000027107
     40        1           0.000005174    0.000010937    0.000023868
     41        1          -0.000014446   -0.000012127   -0.000022949
     42        8           0.044440570   -0.000204419   -0.006411405
     43        1           0.008622211   -0.000085131   -0.000649149
 -------------------------------------------------------------------
 Cartesian Forces:  Max     0.133096944 RMS     0.018480139

 GradGradGradGradGradGradGradGradGradGradGradGradGradGradGradGradGradGrad
 Berny optimization.
 Internal  Forces:  Max     0.108685347 RMS     0.011304906
 Search for a local minimum.
 Step number   1 out of a maximum of  227
 All quantities printed in internal units (Hartrees-Bohrs-Radians)
 Mixed Optimization -- RFO/linear search
 Second derivative matrix not updated -- first step.
     Eigenvalues ---    0.00649   0.00802   0.00904   0.01005   0.01294
     Eigenvalues ---    0.01333   0.01516   0.01642   0.01777   0.01897
     Eigenvalues ---    0.01988   0.02036   0.02042   0.02058   0.02088
     Eigenvalues ---    0.02089   0.02095   0.02103   0.02104   0.02120
     Eigenvalues ---    0.02122   0.02125   0.02129   0.02131   0.02139
     Eigenvalues ---    0.02143   0.02144   0.02147   0.02148   0.02152
     Eigenvalues ---    0.02152   0.02156   0.02173   0.02185   0.02194
     Eigenvalues ---    0.02203   0.02210   0.02756   0.06387   0.07333
     Eigenvalues ---    0.11392   0.13892   0.15998   0.15998   0.15999
     Eigenvalues ---    0.15999   0.16000   0.16000   0.16000   0.16000
     Eigenvalues ---    0.16000   0.16000   0.16000   0.16000   0.16000
     Eigenvalues ---    0.16000   0.16000   0.16000   0.22000   0.22000
     Eigenvalues ---    0.22000   0.22000   0.22000   0.22000   0.22019
     Eigenvalues ---    0.22957   0.22964   0.23471   0.24000   0.24000
     Eigenvalues ---    0.24982   0.24998   0.25000   0.25000   0.25000
     Eigenvalues ---    0.25000   0.25000   0.25000   0.31466   0.32666
     Eigenvalues ---    0.33648   0.33907   0.34353   0.35019   0.35131
     Eigenvalues ---    0.35202   0.35261   0.35274   0.35277   0.35351
     Eigenvalues ---    0.35363   0.35408   0.35435   0.35460   0.35489
     Eigenvalues ---    0.35521   0.35623   0.37230   0.37322   0.40947
     Eigenvalues ---    0.40980   0.41419   0.41626   0.41957   0.41976
     Eigenvalues ---    0.42015   0.44630   0.44734   0.44997   0.45279
     Eigenvalues ---    0.45836   0.45931   0.46031   0.46274   0.46356
     Eigenvalues ---    0.46551   0.47573   0.48020   0.52537   0.52786
     Eigenvalues ---    0.54077   0.55122   0.910861000.000001000.00000
     Eigenvalues --- 1000.000001000.000001000.000001000.000001000.00000
     Eigenvalues --- 1000.000001000.000001000.000001000.000001000.00000
     Eigenvalues --- 1000.000001000.000001000.000001000.000001000.00000
     Eigenvalues --- 1000.000001000.000001000.000001000.000001000.00000
     Eigenvalues --- 1000.000001000.000001000.000001000.000001000.00000
     Eigenvalues --- 1000.000001000.000001000.000001000.000001000.00000
     Eigenvalues --- 1000.000001000.000001000.000001000.000001000.00000
     Eigenvalues --- 1000.000001000.000001000.000001000.000001000.00000
     Eigenvalues --- 1000.000001000.000001000.000001000.000001000.00000
     Eigenvalues --- 1000.000001000.000001000.000001000.000001000.00000
     Eigenvalues --- 1000.000001000.000001000.000001000.000001000.00000
     Eigenvalues --- 1000.000001000.000001000.000001000.000001000.00000
     Eigenvalues --- 1000.000001000.000001000.000001000.000001000.00000
     Eigenvalues --- 1000.000001000.000001000.000001000.000001000.00000
     Eigenvalues --- 1000.000001000.000001000.000001000.000001000.00000
     Eigenvalues --- 1000.000001000.000001000.000001000.000001000.00000
     Eigenvalues --- 1000.000001000.000001000.000001000.000001000.00000
     Eigenvalues --- 1000.000001000.000001000.000001000.000001000.00000
     Eigenvalues --- 1000.000001000.00000
 RFO step:  Lambda=-5.97410007D-02 EMin= 6.48870042D-03
 Linear search not attempted -- first point.
 Maximum step size (   0.300) exceeded in Quadratic search.
    -- Step size scaled by   0.796
 Iteration  1 RMS(Cart)=  0.12269981 RMS(Int)=  0.00178272
 Iteration  2 RMS(Cart)=  0.00885748 RMS(Int)=  0.00000729
 Iteration  3 RMS(Cart)=  0.00001338 RMS(Int)=  0.00000300
 Iteration  4 RMS(Cart)=  0.00000000 RMS(Int)=  0.00000300
 Variable       Old X    -DE/DX   Delta X   Delta X   Delta X     New X
                                 (Linear)    (Quad)   (Total)
    R1        2.61250   0.00239   0.00000   0.00359   0.00359   2.61609
    R2        2.67005  -0.00177   0.00000  -0.00292  -0.00292   2.66713
    R3        2.05108   0.00050   0.00000   0.00096   0.00096   2.05205
    R4        2.65866  -0.00275   0.00000  -0.00415  -0.00415   2.65451
    R5        2.05018   0.00012   0.00000   0.00023   0.00023   2.05041
    R6        2.64561   0.00221   0.00000   0.00349   0.00349   2.64910
    R7        2.57154   0.00055   0.00000   0.00074   0.00074   2.57228
    R8        2.63422  -0.00126   0.00000  -0.00201  -0.00201   2.63220
    R9        2.04675   0.00005   0.00000   0.00010   0.00010   2.04685
   R10        2.65369  -0.00354   0.00000  -0.00573  -0.00573   2.64796
   R11        2.05348  -0.00213   0.00000  -0.00411  -0.00411   2.04937
   R12        2.75363   0.02564   0.00000   0.04716   0.04716   2.80079
   R13        2.70243  -0.00013   0.00000  -0.00023  -0.00023   2.70221
   R14        2.55024   0.10869   0.00000   0.14169   0.14169   2.69193
   R15        2.32436   0.04326   0.00000   0.03550   0.03550   2.35987
   R16        2.80038  -0.09102   0.00000  -0.17977  -0.17977   2.62061
   R17        2.04838   0.00052   0.00000   0.00100   0.00100   2.04938
   R18        2.82942  -0.02498   0.00000  -0.05149  -0.05149   2.77793
   R19        2.02201   0.00833   0.00000   0.01535   0.01535   2.03736
   R20        2.65446   0.00526   0.00000   0.00851   0.00851   2.66298
   R21        2.65661   0.00338   0.00000   0.00547   0.00547   2.66208
   R22        2.62211   0.00109   0.00000   0.00174   0.00174   2.62385
   R23        2.04934   0.00116   0.00000   0.00222   0.00222   2.05157
   R24        2.64913  -0.00189   0.00000  -0.00308  -0.00308   2.64605
   R25        2.05645  -0.00015   0.00000  -0.00029  -0.00029   2.05615
   R26        2.64464   0.00272   0.00000   0.00392   0.00392   2.64856
   R27        2.57388  -0.00022   0.00000  -0.00030  -0.00030   2.57358
   R28        2.62621  -0.00273   0.00000  -0.00420  -0.00420   2.62201
   R29        2.04974  -0.00009   0.00000  -0.00017  -0.00017   2.04957
   R30        2.04889  -0.00055   0.00000  -0.00107  -0.00107   2.04782
   R31        1.82662   0.00002   0.00000   0.00003   0.00003   1.82665
   R32        2.85131   0.00004   0.00000   0.00008   0.00008   2.85139
   R33        2.07487  -0.00005   0.00000  -0.00009  -0.00009   2.07478
   R34        2.07928  -0.00005   0.00000  -0.00011  -0.00011   2.07917
   R35        2.64643   0.00000   0.00000  -0.00001  -0.00001   2.64642
   R36        2.64215   0.00001   0.00000   0.00002   0.00002   2.64216
   R37        2.63378   0.00004   0.00000   0.00006   0.00006   2.63384
   R38        2.05089  -0.00001   0.00000  -0.00002  -0.00002   2.05087
   R39        2.63988   0.00001   0.00000   0.00001   0.00001   2.63989
   R40        2.05254   0.00003   0.00000   0.00005   0.00005   2.05259
   R41        2.63545   0.00000   0.00000  -0.00001  -0.00001   2.63544
   R42        2.05228   0.00003   0.00000   0.00005   0.00005   2.05233
   R43        2.63810   0.00005   0.00000   0.00007   0.00007   2.63818
   R44        2.05232   0.00003   0.00000   0.00005   0.00005   2.05237
   R45        2.05463  -0.00001   0.00000  -0.00002  -0.00002   2.05461
    A1        2.11724   0.00081   0.00000   0.00243   0.00243   2.11967
    A2        2.07346  -0.00097   0.00000  -0.00326  -0.00326   2.07020
    A3        2.09248   0.00016   0.00000   0.00083   0.00083   2.09331
    A4        2.10025  -0.00185   0.00000  -0.00467  -0.00467   2.09558
    A5        2.11795   0.00114   0.00000   0.00312   0.00312   2.12107
    A6        2.06499   0.00071   0.00000   0.00155   0.00155   2.06654
    A7        2.08640  -0.00022   0.00000  -0.00009  -0.00009   2.08631
    A8        2.01588   0.00027   0.00000   0.00045   0.00045   2.01632
    A9        2.18090  -0.00004   0.00000  -0.00036  -0.00036   2.18054
   A10        2.08296   0.00136   0.00000   0.00387   0.00387   2.08683
   A11        2.11534  -0.00044   0.00000  -0.00107  -0.00107   2.11427
   A12        2.08488  -0.00092   0.00000  -0.00279  -0.00279   2.08208
   A13        2.13174  -0.00150   0.00000  -0.00476  -0.00476   2.12698
   A14        2.07603   0.00388   0.00000   0.01371   0.01371   2.08974
   A15        2.07542  -0.00237   0.00000  -0.00895  -0.00895   2.06647
   A16        2.04778   0.00141   0.00000   0.00323   0.00323   2.05101
   A17        2.15878  -0.00198   0.00000  -0.00489  -0.00489   2.15388
   A18        2.07663   0.00057   0.00000   0.00166   0.00166   2.07829
   A19        2.07125  -0.00017   0.00000  -0.00042  -0.00042   2.07083
   A20        2.23844  -0.04239   0.00000  -0.10900  -0.10900   2.12944
   A21        2.02647   0.00723   0.00000   0.01860   0.01860   2.04507
   A22        2.01828   0.03516   0.00000   0.09040   0.09040   2.10867
   A23        2.09411   0.00925   0.00000   0.02633   0.02633   2.12044
   A24        2.11006  -0.00093   0.00000   0.00020   0.00020   2.11027
   A25        2.07894  -0.00832   0.00000  -0.02655  -0.02655   2.05238
   A26        2.08251   0.02552   0.00000   0.07266   0.07265   2.15516
   A27        2.10034  -0.01507   0.00000  -0.04472  -0.04472   2.05562
   A28        2.10034  -0.01044   0.00000  -0.02794  -0.02794   2.07240
   A29        2.04989   0.00109   0.00000   0.00249   0.00249   2.05237
   A30        2.17312   0.00149   0.00000   0.00354   0.00354   2.17666
   A31        2.06012  -0.00258   0.00000  -0.00602  -0.00602   2.05410
   A32        2.11720   0.00152   0.00000   0.00492   0.00492   2.12212
   A33        2.05598   0.00252   0.00000   0.00943   0.00943   2.06541
   A34        2.11000  -0.00404   0.00000  -0.01435  -0.01435   2.09565
   A35        2.09035  -0.00082   0.00000  -0.00252  -0.00252   2.08783
   A36        2.09980   0.00050   0.00000   0.00159   0.00159   2.10140
   A37        2.09303   0.00032   0.00000   0.00093   0.00093   2.09396
   A38        2.09241   0.00012   0.00000  -0.00050  -0.00051   2.09191
   A39        2.14056   0.00031   0.00000   0.00119   0.00119   2.14175
   A40        2.05021  -0.00042   0.00000  -0.00069  -0.00069   2.04952
   A41        2.08953   0.00185   0.00000   0.00442   0.00442   2.09395
   A42        2.07530  -0.00073   0.00000  -0.00152  -0.00152   2.07378
   A43        2.11836  -0.00111   0.00000  -0.00290  -0.00290   2.11545
   A44        2.11674  -0.00008   0.00000  -0.00030  -0.00030   2.11644
   A45        2.10597  -0.00054   0.00000  -0.00197  -0.00197   2.10401
   A46        2.06038   0.00063   0.00000   0.00227   0.00227   2.06266
   A47        1.90592   0.00047   0.00000   0.00170   0.00170   1.90762
   A48        1.90091  -0.00013   0.00000  -0.00033  -0.00033   1.90057
   A49        1.92299   0.00012   0.00000   0.00051   0.00051   1.92350
   A50        1.90405   0.00011   0.00000   0.00044   0.00044   1.90449
   A51        1.92734   0.00000   0.00000  -0.00008  -0.00008   1.92726
   A52        1.93002  -0.00005   0.00000  -0.00033  -0.00033   1.92970
   A53        1.87846  -0.00004   0.00000  -0.00020  -0.00020   1.87826
   A54        2.10658   0.00000   0.00000   0.00001   0.00001   2.10659
   A55        2.09675   0.00008   0.00000   0.00021   0.00021   2.09696
   A56        2.07926  -0.00008   0.00000  -0.00022  -0.00022   2.07904
   A57        2.10035   0.00005   0.00000   0.00013   0.00013   2.10048
   A58        2.08291  -0.00008   0.00000  -0.00027  -0.00027   2.08264
   A59        2.09982   0.00003   0.00000   0.00014   0.00014   2.09996
   A60        2.09853   0.00002   0.00000   0.00004   0.00004   2.09857
   A61        2.08980   0.00000   0.00000   0.00001   0.00001   2.08981
   A62        2.09486  -0.00002   0.00000  -0.00005  -0.00005   2.09481
   A63        2.08926  -0.00004   0.00000  -0.00012  -0.00012   2.08914
   A64        2.09690   0.00002   0.00000   0.00007   0.00007   2.09696
   A65        2.09702   0.00002   0.00000   0.00005   0.00005   2.09707
   A66        2.09466   0.00001   0.00000   0.00002   0.00002   2.09468
   A67        2.09770  -0.00001   0.00000  -0.00004  -0.00004   2.09766
   A68        2.09079   0.00000   0.00000   0.00001   0.00001   2.09080
   A69        2.10425   0.00005   0.00000   0.00014   0.00014   2.10439
   A70        2.08866  -0.00006   0.00000  -0.00018  -0.00018   2.08848
   A71        2.09027   0.00000   0.00000   0.00004   0.00004   2.09031
    D1        0.00006   0.00002   0.00000   0.00017   0.00017   0.00022
    D2        3.14064   0.00000   0.00000   0.00004   0.00004   3.14068
    D3        3.14114   0.00001   0.00000   0.00011   0.00011   3.14125
    D4       -0.00146   0.00000   0.00000  -0.00002  -0.00002  -0.00148
    D5       -0.00016  -0.00002   0.00000  -0.00024  -0.00024  -0.00040
    D6       -3.14110  -0.00001   0.00000  -0.00004  -0.00004  -3.14115
    D7       -3.14124  -0.00002   0.00000  -0.00018  -0.00018  -3.14142
    D8        0.00100   0.00000   0.00000   0.00002   0.00002   0.00102
    D9        0.00079  -0.00001   0.00000  -0.00005  -0.00005   0.00074
   D10        3.13788  -0.00002   0.00000  -0.00022  -0.00022   3.13766
   D11       -3.13982   0.00001   0.00000   0.00008   0.00008  -3.13975
   D12       -0.00274  -0.00001   0.00000  -0.00009  -0.00009  -0.00283
   D13       -0.00152   0.00000   0.00000   0.00001   0.00001  -0.00152
   D14        3.13768  -0.00001   0.00000  -0.00012  -0.00012   3.13756
   D15       -3.13815   0.00002   0.00000   0.00019   0.00019  -3.13796
   D16        0.00106   0.00001   0.00000   0.00006   0.00006   0.00112
   D17        3.11535   0.00001   0.00000   0.00008   0.00008   3.11543
   D18       -0.03103  -0.00001   0.00000  -0.00010  -0.00010  -0.03112
   D19        0.00145  -0.00001   0.00000  -0.00009  -0.00009   0.00136
   D20       -3.14134  -0.00001   0.00000  -0.00005  -0.00005  -3.14139
   D21       -3.13780   0.00000   0.00000   0.00003   0.00003  -3.13776
   D22        0.00260   0.00001   0.00000   0.00007   0.00007   0.00267
   D23       -0.00060   0.00002   0.00000   0.00021   0.00021  -0.00040
   D24        3.14037   0.00000   0.00000   0.00001   0.00001   3.14039
   D25       -3.14100   0.00001   0.00000   0.00015   0.00015  -3.14085
   D26       -0.00002  -0.00001   0.00000  -0.00004  -0.00004  -0.00007
   D27        0.00797   0.00003   0.00000   0.00036   0.00035   0.00832
   D28       -3.13397  -0.00002   0.00000  -0.00024  -0.00023  -3.13420
   D29       -3.13296   0.00005   0.00000   0.00056   0.00055  -3.13241
   D30        0.00828  -0.00001   0.00000  -0.00004  -0.00003   0.00825
   D31       -3.09741   0.00002   0.00000   0.00007   0.00007  -3.09733
   D32        1.06929   0.00003   0.00000   0.00006   0.00006   1.06935
   D33       -0.98926  -0.00006   0.00000  -0.00026  -0.00026  -0.98952
   D34       -3.13556   0.00016   0.00000   0.00151   0.00150  -3.13405
   D35       -0.00730  -0.00003   0.00000  -0.00030  -0.00031  -0.00761
   D36        0.00638   0.00023   0.00000   0.00211   0.00212   0.00850
   D37        3.13464   0.00004   0.00000   0.00031   0.00031   3.13495
   D38       -3.09728  -0.00085   0.00000  -0.00973  -0.00971  -3.10699
   D39        0.04431  -0.00047   0.00000  -0.00531  -0.00532   0.03900
   D40        0.05741  -0.00071   0.00000  -0.00815  -0.00815   0.04927
   D41       -3.08418  -0.00033   0.00000  -0.00374  -0.00375  -3.08793
   D42       -3.03529   0.00032   0.00000   0.00383   0.00384  -3.03145
   D43        0.11798   0.00031   0.00000   0.00356   0.00357   0.12155
   D44        0.10630  -0.00006   0.00000  -0.00058  -0.00059   0.10571
   D45       -3.02361  -0.00007   0.00000  -0.00085  -0.00087  -3.02448
   D46       -3.13791  -0.00020   0.00000  -0.00196  -0.00197  -3.13988
   D47        0.00353  -0.00004   0.00000  -0.00040  -0.00039   0.00314
   D48       -0.00722  -0.00016   0.00000  -0.00165  -0.00165  -0.00888
   D49        3.13422   0.00000   0.00000  -0.00008  -0.00007   3.13414
   D50        3.13301   0.00027   0.00000   0.00269   0.00269   3.13570
   D51        0.00612   0.00024   0.00000   0.00239   0.00239   0.00851
   D52        0.00316   0.00023   0.00000   0.00236   0.00236   0.00552
   D53       -3.12373   0.00020   0.00000   0.00207   0.00206  -3.12167
   D54        0.00523   0.00002   0.00000   0.00018   0.00018   0.00541
   D55       -3.13703   0.00002   0.00000   0.00018   0.00018  -3.13685
   D56       -3.13620  -0.00015   0.00000  -0.00144  -0.00143  -3.13763
   D57        0.00472  -0.00015   0.00000  -0.00143  -0.00143   0.00329
   D58        0.00095   0.00006   0.00000   0.00065   0.00065   0.00160
   D59        3.14102  -0.00008   0.00000  -0.00075  -0.00075   3.14026
   D60       -3.13997   0.00007   0.00000   0.00064   0.00065  -3.13933
   D61        0.00009  -0.00008   0.00000  -0.00075  -0.00075  -0.00066
   D62       -0.00492   0.00000   0.00000   0.00006   0.00006  -0.00486
   D63        3.13428  -0.00012   0.00000  -0.00119  -0.00120   3.13308
   D64        3.13812   0.00014   0.00000   0.00138   0.00138   3.13950
   D65       -0.00587   0.00001   0.00000   0.00013   0.00013  -0.00574
   D66       -0.00096   0.00005   0.00000   0.00052   0.00053  -0.00043
   D67        3.13914  -0.00009   0.00000  -0.00084  -0.00084   3.13830
   D68        0.00282  -0.00017   0.00000  -0.00161  -0.00162   0.00120
   D69        3.13009  -0.00014   0.00000  -0.00136  -0.00136   3.12873
   D70       -3.13631  -0.00004   0.00000  -0.00034  -0.00034  -3.13665
   D71       -0.00904  -0.00001   0.00000  -0.00008  -0.00008  -0.00913
   D72        0.76503  -0.00004   0.00000  -0.00037  -0.00037   0.76466
   D73       -2.41418  -0.00003   0.00000  -0.00034  -0.00034  -2.41452
   D74        2.87886   0.00002   0.00000   0.00000   0.00000   2.87886
   D75       -0.30035   0.00003   0.00000   0.00003   0.00003  -0.30031
   D76       -1.32710  -0.00006   0.00000  -0.00050  -0.00050  -1.32760
   D77        1.77688  -0.00006   0.00000  -0.00047  -0.00047   1.77641
   D78        3.10465   0.00000   0.00000  -0.00003  -0.00003   3.10462
   D79       -0.05258  -0.00001   0.00000  -0.00008  -0.00008  -0.05266
   D80        0.00030  -0.00001   0.00000  -0.00007  -0.00007   0.00023
   D81        3.12625  -0.00001   0.00000  -0.00012  -0.00012   3.12614
   D82       -3.09605   0.00000   0.00000   0.00002   0.00002  -3.09603
   D83        0.04869   0.00000   0.00000  -0.00002  -0.00002   0.04867
   D84        0.00852   0.00001   0.00000   0.00005   0.00005   0.00857
   D85       -3.12994   0.00000   0.00000   0.00002   0.00002  -3.12992
   D86       -0.00788   0.00000   0.00000   0.00005   0.00005  -0.00783
   D87        3.13507   0.00000   0.00000   0.00001   0.00001   3.13509
   D88       -3.13367   0.00001   0.00000   0.00010   0.00010  -3.13358
   D89        0.00928   0.00001   0.00000   0.00006   0.00006   0.00934
   D90        0.00664   0.00000   0.00000   0.00000   0.00000   0.00664
   D91       -3.13963   0.00000   0.00000  -0.00002  -0.00002  -3.13965
   D92       -3.13632   0.00000   0.00000   0.00003   0.00003  -3.13629
   D93        0.00060   0.00000   0.00000   0.00001   0.00001   0.00061
   D94        0.00215   0.00000   0.00000  -0.00002  -0.00002   0.00213
   D95        3.13323   0.00000   0.00000  -0.00001  -0.00001   3.13323
   D96       -3.13477   0.00000   0.00000   0.00000   0.00000  -3.13477
   D97       -0.00368   0.00000   0.00000   0.00001   0.00001  -0.00367
   D98       -0.00978   0.00000   0.00000  -0.00001  -0.00001  -0.00979
   D99        3.12867   0.00000   0.00000   0.00003   0.00003   3.12870
   D100      -3.14091   0.00000   0.00000  -0.00002  -0.00002  -3.14093
   D101      -0.00246   0.00000   0.00000   0.00001   0.00001  -0.00245
         Item               Value     Threshold  Converged?
 Maximum Force            0.108685     0.000450     NO 
 RMS     Force            0.011305     0.000300     NO 
 Maximum Displacement     0.516358     0.001800     NO 
 RMS     Displacement     0.124812     0.001200     NO 
 Predicted change in Energy=-3.132166D-02
 GradGradGradGradGradGradGradGradGradGradGradGradGradGradGradGradGradGrad

                          Input orientation:                          
 ---------------------------------------------------------------------
 Center     Atomic      Atomic             Coordinates (Angstroms)
 Number     Number       Type             X           Y           Z
 ---------------------------------------------------------------------
      1          6           0        0.168377    0.010728   -0.103002
      2          6           0        0.109878    0.010287    1.280137
      3          6           0        1.294717    0.003854    2.034668
      4          6           0        2.532764   -0.001189    1.377108
      5          6           0        2.571475   -0.001590   -0.015255
      6          6           0        1.402471    0.004543   -0.787825
      7          8           0        1.129739    0.008803    3.385818
      8          6           0        1.515721    0.005296   -2.265605
      9          6           0        0.369119    0.022474   -3.110726
     10          6           0        0.487382    0.014093   -4.492415
     11          6           0       -0.663364    0.073466   -5.405218
     12          6           0       -0.411891   -0.079419   -6.783331
     13          6           0       -1.436850   -0.035362   -7.718956
     14          6           0       -2.754486    0.171891   -7.292896
     15          6           0       -3.029045    0.335022   -5.928212
     16          6           0       -1.996615    0.285111   -5.002588
     17          8           0       -3.806803    0.227719   -8.155586
     18          6           0        2.291575   -0.030074    4.218509
     19          6           0        1.856429   -0.079393    5.662453
     20          6           0        0.812082   -0.920580    6.066103
     21          6           0        0.445212   -0.993219    7.408756
     22          6           0        1.123109   -0.233724    8.365392
     23          6           0        2.164957    0.604956    7.970265
     24          6           0        2.524769    0.684895    6.623738
     25          1           0       -0.762059    0.015438   -0.662859
     26          1           0       -0.838112    0.015882    1.807935
     27          1           0        3.462299   -0.002457    1.933142
     28          1           0        3.527753   -0.005678   -0.526734
     29          1           0       -0.631348    0.028568   -2.692232
     30          1           0        0.612812   -0.236019   -7.105940
     31          1           0       -1.221261   -0.160127   -8.778129
     32          1           0       -4.054619    0.502547   -5.617631
     33          1           0       -2.240098    0.426982   -3.956210
     34          1           0       -3.486056    0.104735   -9.059107
     35          1           0        2.917953    0.853202    4.037070
     36          1           0        2.887781   -0.919065    3.963974
     37          1           0        0.281484   -1.504398    5.320826
     38          1           0       -0.370266   -1.644411    7.709981
     39          1           0        0.837169   -0.292847    9.411452
     40          1           0        2.692240    1.204794    8.706276
     41          1           0        3.329649    1.349118    6.318619
     42          8           0        2.666912   -0.008826   -2.749371
     43          1           0        1.479074   -0.043135   -4.911493
 ---------------------------------------------------------------------
                    Distance matrix (angstroms):
                    1          2          3          4          5
     1  C    0.000000
     2  C    1.384375   0.000000
     3  C    2.416262   1.404707   0.000000
     4  C    2.789480   2.424853   1.401846   0.000000
     5  C    2.404732   2.781661   2.415020   1.392901   0.000000
     6  C    1.411386   2.438708   2.824549   2.442239   1.401240
     7  O    3.618852   2.339661   1.361194   2.450203   3.694050
     8  C    2.547983   3.814277   4.305949   3.782034   2.485707
     9  C    3.014438   4.398525   5.228016   4.982226   3.799065
    10  C    4.400991   5.784884   6.576831   6.215716   4.938487
    11  C    5.367422   6.730220   7.693557   7.498050   6.286614
    12  C    6.706089   8.080829   8.982012   8.675822   7.396850
    13  C    7.783420   9.131162  10.128977   9.924585   8.684171
    14  C    7.762968   9.040331  10.169942  10.156473   9.019979
    15  C    6.652950   7.868836   9.067086   9.187735   8.151209
    16  C    5.363620   6.632154   7.773991   7.829289   6.769279
    17  O    8.982942  10.218636  11.398109  11.450536  10.344080
    18  C    4.815091   3.659982   2.400842   2.851765   4.243102
    19  C    6.008171   4.718387   3.671958   4.339092   5.723086
    20  C    6.272125   4.925960   4.164131   5.078652   6.397103
    21  C    7.583604   6.219280   5.531422   6.459316   7.785901
    22  C    8.525548   7.161496   6.337505   7.132833   8.508049
    23  C    8.337691   7.023873   6.029093   6.631170   8.018833
    24  C    7.159338   5.902616   4.799627   5.291304   6.674554
    25  H    1.085897   2.129679   3.392213   3.875255   3.395899
    26  H    2.159798   1.085029   2.144880   3.398339   3.866472
    27  H    3.872465   3.415451   2.169968   1.083148   2.142387
    28  H    3.386035   3.866123   3.398135   2.148171   1.084479
    29  H    2.709979   4.040973   5.104303   5.154805   4.174349
    30  H    7.021363   8.404754   9.169146   8.700774   7.359968
    31  H    8.787384  10.147398  11.102865  10.828057   9.549762
    32  H    6.963239   8.072456   9.349960   9.621525   8.691714
    33  H    4.563028   5.754593   6.968828   7.169925   6.234263
    34  H    9.673445  10.947129  12.080472  12.047905  10.885598
    35  H    5.040846   4.024483   2.714019   2.820239   4.155966
    36  H    4.979956   3.972835   2.666806   2.767744   4.095860
    37  H    5.632611   4.318667   3.755036   4.783389   5.998020
    38  H    8.004520   6.656686   6.139880   7.157727   8.428047
    39  H    9.542761   8.169402   7.396914   8.216495   9.589341
    40  H    9.241161   7.952546   6.921393   7.429436   8.805398
    41  H    7.281631   6.127455   4.929800   5.184292   6.520521
    42  O    3.639551   4.772391   4.976958   4.128666   2.735791
    43  H    4.984216   6.341437   6.948765   6.376404   5.016793
                    6          7          8          9         10
     6  C    0.000000
     7  O    4.182547   0.000000
     8  C    1.482114   5.664590   0.000000
     9  C    2.542441   6.540933   1.424507   0.000000
    10  C    3.815949   7.904379   2.452803   1.386767   0.000000
    11  C    5.058927   8.972274   3.822332   2.516608   1.470017
    12  C    6.264587  10.285718   4.912506   3.756114   2.462871
    13  C    7.490254  11.397602   6.201480   4.949813   3.757084
    14  C    7.721674  11.364363   6.598187   5.222048   4.286875
    15  C    6.794935  10.205541   5.846222   4.425318   3.811794
    16  C    5.421876   8.956327   4.461600   3.040529   2.550288
    17  O    9.026087  12.554735   7.941700   6.552180   5.648405
    18  C    5.084790   1.429947   6.530463   7.577353   8.895913
    19  C    6.466777   2.391427   7.935828   8.898940  10.247164
    20  C    6.941235   2.854573   8.412474   9.235787  10.604780
    21  C    8.312389   4.201982   9.784492  10.568676  11.943799
    22  C    9.160578   4.985481  10.640930  11.503713  12.875899
    23  C    8.811698   4.737534  10.273955  11.240671  12.588955
    24  C    7.526865   3.589894   8.972205   9.992268  11.321210
    25  H    2.168162   4.468862   2.785172   2.696603   4.028227
    26  H    3.429039   2.522340   4.704718   5.064649   6.438272
    27  H    3.412712   2.747950   4.628035   5.916840   7.080833
    28  H    2.141284   4.588980   2.659336   4.081027   4.997087
    29  H    2.786353   6.328073   2.189168   1.084485   2.119535
    30  H    6.371813  10.507337   4.929738   4.010978   2.628460
    31  H    8.411662  12.390212   7.066216   5.889152   4.617051
    32  H    7.304441  10.401127   6.520124   5.107298   4.704728
    33  H    4.846176   8.089255   4.140306   2.772450   2.810185
    34  H    9.608426  13.273693   8.436784   7.088891   6.054015
    35  H    5.128013   2.082029   6.512212   7.633979   8.908641
    36  H    5.063476   2.070244   6.445514   7.568456   8.839865
    37  H    6.391332   2.598763   7.833036   8.569135   9.932165
    38  H    8.835970   4.866367  10.285466  10.973281  12.344419
    39  H   10.219260   6.040270  11.700556  12.534889  13.911653
    40  H    9.656193   5.672660  11.099782  12.101087  13.434456
    41  H    7.484881   3.903508   8.876097   9.971824  11.257852
    42  O    2.333806   6.324852   1.248787   2.326244   2.790892
    43  H    4.124655   8.304824   2.646584   2.116381   1.078125
                   11         12         13         14         15
    11  C    0.000000
    12  C    1.409187   0.000000
    13  C    2.442030   1.388480   0.000000
    14  C    2.818831   2.410511   1.400230   0.000000
    15  C    2.436880   2.784329   2.424671   1.401555   0.000000
    16  C    1.408710   2.411489   2.791898   2.415098   1.387510
    17  O    4.179656   3.674621   2.424156   1.361881   2.361697
    18  C   10.067696  11.329239  12.506169  12.570441  11.462908
    19  C   11.351919  12.650803  13.780774  13.753718  12.585036
    20  C   11.608457  12.934977  13.995326  13.869995  12.656793
    21  C   12.905994  14.247280  15.274400  15.090862  13.845917
    22  C   13.889404  15.227076  16.288001  16.136364  14.895334
    23  C   13.681572  14.992569  16.110080  16.042212  14.839751
    24  C   12.459286  13.746187  14.897183  14.893167  13.730212
    25  H    4.743741   6.131215   7.088472   6.924712   5.741543
    26  H    7.215499   8.602360   9.545824   9.301718   8.046740
    27  H    8.418930   9.538982  10.824313  11.126482  10.200605
    28  H    6.432055   7.394001   8.739349   9.234664   8.501980
    29  H    2.713547   4.098404   5.091255   5.068961   4.039114
    30  H    2.148688   1.085642   2.148760   3.397064   3.869917
    31  H    3.426711   2.154255   1.088069   2.160308   3.411053
    32  H    3.424885   3.868721   3.399650   2.146204   1.084585
    33  H    2.170412   3.404614   3.875207   3.385726   2.125956
    34  H    4.617302   3.829303   2.452525   1.912905   3.172443
    35  H   10.128702  11.359521  12.568134  12.688927  11.616460
    36  H   10.068639  11.273748  12.488963  12.638927  11.594693
    37  H   10.882573  12.207454  13.234298  13.081783  11.869454
    38  H   13.230475  14.577621  15.549236  15.299340  14.035227
    39  H   14.896963  16.244282  17.282602  17.092432  15.831839
    40  H   14.549028  15.849693  16.981625  16.932431  15.737149
    41  H   12.450694  13.700399  14.889251  14.955798  13.836411
    42  O    4.260402   5.075120   6.445024   7.075863   6.532013
    43  H    2.201681   2.660986   4.047780   4.862134   4.636794
                   16         17         18         19         20
    16  C    0.000000
    17  O    3.636134   0.000000
    18  C   10.174309  13.797641   0.000000
    19  C   11.345568  14.936690   1.508893   0.000000
    20  C   11.482961  14.996971   2.528934   1.400425   0.000000
    21  C   12.713698  16.180823   3.809774   2.424084   1.393767
    22  C   13.736985  17.247019   4.313169   2.804899   2.419760
    23  C   13.627762  17.200212   3.807226   2.426833   2.789868
    24  C   12.480954  16.084969   2.520057   1.398172   2.412842
    25  H    4.519967   8.090519   5.757995   6.846535   6.973735
    26  H    6.913598  10.398546   3.950686   4.703927   4.661770
    27  H    8.831013  12.436851   2.567928   4.061095   4.994794
    28  H    7.115931  10.585347   4.903678   6.411302   7.188700
    29  H    2.695833   6.322295   7.503683   8.717881   8.927083
    30  H    3.391869   4.566159  11.450057  12.829769  13.191325
    31  H    3.879964   2.687566  13.463638  14.765132  15.002134
    32  H    2.158920   2.564792  11.717829  12.748311  12.736550
    33  H    1.083660   4.486539   9.357937  10.466930  10.563072
    34  H    4.325080   0.966620  14.480825  15.662068  15.757451
    35  H   10.304907  13.938236   1.097928   2.153703   3.420229
    36  H   10.281371  13.893030   1.100251   2.157212   2.954230
    37  H   10.722171  14.189009   2.725655   2.151232   1.085272
    38  H   12.960613  16.341080   4.677805   3.405852   2.150399
    39  H   14.701324  18.177962   5.399167   3.890945   3.403827
    40  H   14.517718  18.097365   4.671775   3.407723   3.875916
    41  H   12.556709  16.176807   2.718498   2.154432   3.399035
    42  O    5.187665   8.437541   6.978014   8.451074   9.054517
    43  H    3.492343   6.207898   9.166093  10.580739  11.032788
                   21         22         23         24         25
    21  C    0.000000
    22  C    1.396971   0.000000
    23  C    2.413913   1.394617   0.000000
    24  C    2.785117   2.416997   1.396062   0.000000
    25  H    8.223494   9.226334   9.134866   8.021590   0.000000
    26  H    5.833900   6.849009   6.880388   5.911726   2.471964
    27  H    6.329831   6.848294   6.204748   4.832505   4.958300
    28  H    8.570256   9.214349   8.627229   7.253421   4.292024
    29  H   10.209455  11.199016  11.038133   9.857948   2.033621
    30  H   14.535399  15.479745  15.179208  13.892722   6.592936
    31  H   16.293754  17.303231  17.104401  15.873384   8.130148
    32  H   13.862631  14.929028  14.944046  13.898659   5.968919
    33  H   11.763941  12.789432  12.715226  11.606282   3.633198
    34  H   16.966169  18.026983  17.949476  16.805304   8.827521
    35  H    4.570774   4.810119   4.012313   2.621788   6.027741
    36  H    4.223525   4.791267   4.346894   3.127109   5.966758
    37  H    2.155820   3.404750   3.875096   3.394541   6.261259
    38  H    1.086183   2.156332   3.399228   3.871282   8.544767
    39  H    2.157532   1.086048   2.155479   3.402253  10.205112
    40  H    3.400581   2.155855   1.086069   2.152976  10.056213
    41  H    3.872327   3.400513   2.153653   1.087254   8.201330
    42  O   10.444736  11.223719  10.748920   9.399821   4.013971
    43  H   12.400002  13.283023  12.916274  11.605389   4.803853
                   26         27         28         29         30
    26  H    0.000000
    27  H    4.302272   0.000000
    28  H    4.950951   2.460749   0.000000
    29  H    4.504932   6.176811   4.689209   0.000000
    30  H    9.034700   9.480461   7.199715   4.593339   0.000000
    31  H   10.594458  11.691533   9.521687   6.117332   2.483104
    32  H    8.106898  10.666455   9.147015   4.527847   4.954337
    33  H    5.946422   8.208911   6.724330   2.084335   4.301101
    34  H   11.185353  13.004641  11.045683   6.977984   4.553207
    35  H    4.447265   2.335589   4.683784   7.652519  11.430955
    36  H    4.405099   2.300982   4.627126   7.588633  11.321882
    37  H    3.988126   4.883626   6.854077   8.209283  12.495722
    38  H    6.148951   7.124355   9.258697  10.539120  14.915145
    39  H    7.792005   7.930999  10.299964  12.196680  16.519014
    40  H    7.839898   6.922845   9.349427  11.931292  16.013311
    41  H    6.284426   4.590943   6.980944   9.931202  13.788134
    42  O    5.749334   4.749591   2.383522   3.298967   4.821891
    43  H    7.107991   7.126280   4.839897   3.063355   2.367110
                   31         32         33         34         35
    31  H    0.000000
    32  H    4.296021   0.000000
    33  H    4.963228   2.461405   0.000000
    34  H    2.297476   3.510737   5.262682   0.000000
    35  H   13.505156  11.914401   9.522587  14.597307   0.000000
    36  H   13.409750  11.917426   9.530807  14.535288   1.774030
    37  H   14.242396  11.936476   9.805712  14.952128   3.762615
    38  H   16.576643  13.993182  11.995289  17.145553   5.526367
    39  H   18.306164  15.825156  13.736161  18.973927   5.875974
    40  H   17.968943  15.848898  13.611447  18.841186   4.687862
    41  H   15.839836  14.061229  11.723674  16.866440   2.370843
    42  O    7.175424   7.325803   5.071995   8.813891   6.845575
    43  H    4.717666   5.605190   3.868567   6.471251   9.107720
                   36         37         38         39         40
    36  H    0.000000
    37  H    2.996071   0.000000
    38  H    5.017327   2.480413   0.000000
    39  H    5.854245   4.302309   2.485886   0.000000
    40  H    5.199850   4.961122   4.299944   2.486261   0.000000
    41  H    3.299130   4.292954   4.958476   4.298154   2.475485
    42  O    6.778371   8.547226  11.013521  12.300986  11.519781
    43  H    9.029153  10.405280  12.856351  14.339496  13.728536
                   41         42         43
    41  H    0.000000
    42  O    9.193024   0.000000
    43  H   11.466403   2.467165   0.000000
 Stoichiometry    C22H18O3
 Framework group  C1[X(C22H18O3)]
 Deg. of freedom   123
 Full point group                 C1      NOp   1
 Largest Abelian subgroup         C1      NOp   1
 Largest concise Abelian subgroup C1      NOp   1
                         Standard orientation:                         
 ---------------------------------------------------------------------
 Center     Atomic      Atomic             Coordinates (Angstroms)
 Number     Number       Type             X           Y           Z
 ---------------------------------------------------------------------
      1          6           0       -0.063964   -0.296642   -0.022136
      2          6           0       -1.388454   -0.697467   -0.061654
      3          6           0       -2.415075    0.260658   -0.026363
      4          6           0       -2.087840    1.621742    0.048062
      5          6           0       -0.749490    2.005682    0.087847
      6          6           0        0.290635    1.067349    0.054005
      7          8           0       -3.681907   -0.234960   -0.074830
      8          6           0        1.693079    1.544709    0.098058
      9          6           0        2.798022    0.646623    0.056085
     10          6           0        4.106037    1.104489    0.106864
     11          6           0        5.278214    0.221226    0.024411
     12          6           0        6.547191    0.800263    0.224965
     13          6           0        7.709793    0.043643    0.163666
     14          6           0        7.629783   -1.327300   -0.109753
     15          6           0        6.379738   -1.924846   -0.321137
     16          6           0        5.224858   -1.158786   -0.253409
     17          8           0        8.728794   -2.127982   -0.185925
     18          6           0       -4.778968    0.679934   -0.010213
     19          6           0       -6.069003   -0.102692   -0.018246
     20          6           0       -6.212246   -1.253052    0.767467
     21          6           0       -7.421642   -1.945518    0.788315
     22          6           0       -8.505118   -1.492034    0.032034
     23          6           0       -8.369543   -0.346331   -0.751510
     24          6           0       -7.154515    0.340616   -0.779840
     25          1           0        0.710595   -1.057188   -0.050394
     26          1           0       -1.662517   -1.745633   -0.121033
     27          1           0       -2.858419    2.382530    0.072949
     28          1           0       -0.493274    3.057875    0.145624
     29          1           0        2.642902   -0.425082   -0.003011
     30          1           0        6.601034    1.864466    0.432790
     31          1           0        8.679398    0.509918    0.325987
     32          1           0        6.337930   -2.986382   -0.539583
     33          1           0        4.274881   -1.648055   -0.433630
     34          1           0        9.521459   -1.598630   -0.025227
     35          1           0       -4.745768    1.372634   -0.861395
     36          1           0       -4.695608    1.278181    0.909409
     37          1           0       -5.367409   -1.608367    1.348687
     38          1           0       -7.519884   -2.840035    1.396576
     39          1           0       -9.447371   -2.031762    0.050799
     40          1           0       -9.204325    0.008839   -1.348619
     41          1           0       -7.049650    1.226462   -1.401450
     42          8           0        1.873609    2.778090    0.173220
     43          1           0        4.263103    2.165444    0.216682
 ---------------------------------------------------------------------
 Rotational constants (GHZ):      0.7879195      0.0509361      0.0482394
 Standard basis: 6-31G(d,p) (6D, 7F)
 There are   465 symmetry adapted basis functions of A   symmetry.
 Integral buffers will be    262144 words long.
 Raffenetti 2 integral format.
 Two-electron integral symmetry is turned on.
   465 basis functions,   826 primitive gaussians,   465 cartesian basis functions
    87 alpha electrons       87 beta electrons
       nuclear repulsion energy      1779.2170607051 Hartrees.
 NAtoms=   43 NActive=   43 NUniq=   43 SFac= 7.50D-01 NAtFMM=   80 NAOKFM=F Big=F
 One-electron integrals computed using PRISM.
 NBasis=   465 RedAO= T  NBF=   465
 NBsUse=   465 1.00D-06 NBFU=   465
 Initial guess read from the read-write file.
 B after Tr=     0.000000    0.000000    0.000000
         Rot=    1.000000    0.000000    0.000000    0.000000 Ang=   0.00 deg.
 Initial guess orbital symmetries:
       Occupied  (A) (A) (A) (A) (A) (A) (A) (A) (A) (A) (A) (A)
                 (A) (A) (A) (A) (A) (A) (A) (A) (A) (A) (A) (A)
                 (A) (A) (A) (A) (A) (A) (A) (A) (A) (A) (A) (A)
                 (A) (A) (A) (A) (A) (A) (A) (A) (A) (A) (A) (A)
                 (A) (A) (A) (A) (A) (A) (A) (A) (A) (A) (A) (A)
                 (A) (A) (A) (A) (A) (A) (A) (A) (A) (A) (A) (A)
                 (A) (A) (A) (A) (A) (A) (A) (A) (A) (A) (A) (A)
                 (A) (A) (A)
       Virtual   (A) (A) (A) (A) (A) (A) (A) (A) (A) (A) (A) (A)
                 (A) (A) (A) (A) (A) (A) (A) (A) (A) (A) (A) (A)
                 (A) (A) (A) (A) (A) (A) (A) (A) (A) (A) (A) (A)
                 (A) (A) (A) (A) (A) (A) (A) (A) (A) (A) (A) (A)
                 (A) (A) (A) (A) (A) (A) (A) (A) (A) (A) (A) (A)
                 (A) (A) (A) (A) (A) (A) (A) (A) (A) (A) (A) (A)
                 (A) (A) (A) (A) (A) (A) (A) (A) (A) (A) (A) (A)
                 (A) (A) (A) (A) (A) (A) (A) (A) (A) (A) (A) (A)
                 (A) (A) (A) (A) (A) (A) (A) (A) (A) (A) (A) (A)
                 (A) (A) (A) (A) (A) (A) (A) (A) (A) (A) (A) (A)
                 (A) (A) (A) (A) (A) (A) (A) (A) (A) (A) (A) (A)
                 (A) (A) (A) (A) (A) (A) (A) (A) (A) (A) (A) (A)
                 (A) (A) (A) (A) (A) (A) (A) (A) (A) (A) (A) (A)
                 (A) (A) (A) (A) (A) (A) (A) (A) (A) (A) (A) (A)
                 (A) (A) (A) (A) (A) (A) (A) (A) (A) (A) (A) (A)
                 (A) (A) (A) (A) (A) (A) (A) (A) (A) (A) (A) (A)
                 (A) (A) (A) (A) (A) (A) (A) (A) (A) (A) (A) (A)
                 (A) (A) (A) (A) (A) (A) (A) (A) (A) (A) (A) (A)
                 (A) (A) (A) (A) (A) (A) (A) (A) (A) (A) (A) (A)
                 (A) (A) (A) (A) (A) (A) (A) (A) (A) (A) (A) (A)
                 (A) (A) (A) (A) (A) (A) (A) (A) (A) (A) (A) (A)
                 (A) (A) (A) (A) (A) (A) (A) (A) (A) (A) (A) (A)
                 (A) (A) (A) (A) (A) (A) (A) (A) (A) (A) (A) (A)
                 (A) (A) (A) (A) (A) (A) (A) (A) (A) (A) (A) (A)
                 (A) (A) (A) (A) (A) (A) (A) (A) (A) (A) (A) (A)
                 (A) (A) (A) (A) (A) (A) (A) (A) (A) (A) (A) (A)
                 (A) (A) (A) (A) (A) (A) (A) (A) (A) (A) (A) (A)
                 (A) (A) (A) (A) (A) (A) (A) (A) (A) (A) (A) (A)
                 (A) (A) (A) (A) (A) (A) (A) (A) (A) (A) (A) (A)
                 (A) (A) (A) (A) (A) (A) (A) (A) (A) (A) (A) (A)
                 (A) (A) (A) (A) (A) (A) (A) (A) (A) (A) (A) (A)
                 (A) (A) (A) (A) (A) (A)
 Harris functional with IExCor=  402 diagonalized for initial guess.
 ExpMin= 1.61D-01 ExpMax= 5.48D+03 ExpMxC= 8.25D+02 IAcc=1 IRadAn=         1 AccDes= 0.00D+00
 HarFok:  IExCor=  402 AccDes= 0.00D+00 IRadAn=         1 IDoV= 1
 ScaDFX=  1.000000  1.000000  1.000000  1.000000
 FoFCou: FMM=F IPFlag=           0 FMFlag=      100000 FMFlg1=           0
         NFxFlg=           0 DoJE=T BraDBF=F KetDBF=T FulRan=T
         Omega=  0.000000  0.000000  1.000000  0.000000  0.000000 ICntrl=     500 IOpCl=  0
         NMat0=    1 NMatS0=    1 NMatT0=    0 NMatD0=    1 NMtDS0=    0 NMtDT0=    0
         I1Cent=           4 NGrid=           0.
 Petite list used in FoFCou.
 Requested convergence on RMS density matrix=1.00D-08 within 128 cycles.
 Requested convergence on MAX density matrix=1.00D-06.
 Requested convergence on             energy=1.00D-06.
 No special actions if energy rises.
 Integral accuracy reduced to 1.0D-05 until final iterations.
 Initial convergence to 1.0D-05 achieved.  Increase integral accuracy.
 SCF Done:  E(RB3LYP) =  -1074.85948173     A.U. after   16 cycles
             Convg  =    0.9461D-08             -V/T =  2.0095
 Calling FoFJK, ICntrl=      2127 FMM=F ISym2X=0 I1Cent= 0 IOpClX= 0 NMat=1 NMatS=1 NMatT=0.
 ***** Axes restored to original set *****
 -------------------------------------------------------------------
 Center     Atomic                   Forces (Hartrees/Bohr)
 Number     Number              X              Y              Z
 -------------------------------------------------------------------
      1        6           0.001007182    0.000016169   -0.002858949
      2        6           0.000189520   -0.000038161    0.001594157
      3        6          -0.001396264   -0.000005360   -0.000376533
      4        6          -0.000195450   -0.000020056   -0.001285681
      5        6           0.001869612    0.000033069    0.001110996
      6        6          -0.010880267    0.000129096    0.009876650
      7        8           0.000294574    0.000000549   -0.000036194
      8        6           0.047160556   -0.001423288    0.007958797
      9        6          -0.021432200   -0.000458392   -0.048726945
     10        6          -0.024625058    0.001500180    0.035730448
     11        6           0.014252771   -0.001541203   -0.001753905
     12        6          -0.001125335    0.000715389    0.002297842
     13        6          -0.000731911   -0.000132217   -0.001034693
     14        6           0.000693460   -0.000395065   -0.001317356
     15        6           0.001025000   -0.000335337    0.001220625
     16        6          -0.002489918    0.000238820   -0.001687537
     17        8          -0.000154114    0.000124886    0.000235892
     18        6           0.000030702    0.000001577   -0.000013173
     19        6           0.000033258    0.000010906   -0.000002899
     20        6          -0.000022827    0.000005922    0.000025415
     21        6           0.000027420   -0.000005345   -0.000019893
     22        6          -0.000003437   -0.000006757    0.000006198
     23        6           0.000001603   -0.000004993   -0.000000576
     24        6          -0.000022153   -0.000011672    0.000035857
     25        1           0.000178290    0.000017120    0.001527965
     26        1           0.000040164   -0.000006645   -0.000106160
     27        1           0.000039207    0.000031874    0.000103261
     28        1          -0.000891031    0.000014388   -0.001210953
     29        1           0.001883938    0.000911392    0.002392534
     30        1          -0.000110489   -0.000190009   -0.001539246
     31        1           0.000098238    0.000070513    0.000143001
     32        1          -0.000070360    0.000031506   -0.000032545
     33        1           0.000513723    0.000162192    0.000781119
     34        1          -0.000070827    0.000015816    0.000045164
     35        1          -0.000015561   -0.000024676    0.000012865
     36        1           0.000029799    0.000047529    0.000050137
     37        1          -0.000013045   -0.000001158   -0.000002346
     38        1          -0.000000253   -0.000013238    0.000004567
     39        1          -0.000000721   -0.000008717    0.000000478
     40        1          -0.000000827    0.000002050   -0.000001604
     41        1           0.000004542   -0.000011137   -0.000016553
     42        8          -0.010210869    0.000167186   -0.000665104
     43        1           0.005089358    0.000385299   -0.002465122
 -------------------------------------------------------------------
 Cartesian Forces:  Max     0.048726945 RMS     0.007691469

 GradGradGradGradGradGradGradGradGradGradGradGradGradGradGradGradGradGrad
 Berny optimization.
 Using GEDIIS/GDIIS optimizer.
 Internal  Forces:  Max     0.031274394 RMS     0.003586221
 Search for a local minimum.
 Step number   2 out of a maximum of  227
 All quantities printed in internal units (Hartrees-Bohrs-Radians)
 Mixed Optimization -- RFO/linear search
 Update second derivatives using D2CorX and points    1    2
 DE= -3.04D-02 DEPred=-3.13D-02 R= 9.71D-01
 SS=  1.41D+00  RLast= 3.00D-01 DXNew= 5.0454D-01 9.0000D-01
 Trust test= 9.71D-01 RLast= 3.00D-01 DXMaxT set to 5.05D-01
 Use linear search instead of GDIIS.
     Eigenvalues ---    0.00649   0.00802   0.00903   0.01005   0.01294
     Eigenvalues ---    0.01333   0.01516   0.01639   0.01778   0.01910
     Eigenvalues ---    0.01987   0.02036   0.02058   0.02070   0.02089
     Eigenvalues ---    0.02089   0.02095   0.02103   0.02104   0.02119
     Eigenvalues ---    0.02122   0.02125   0.02129   0.02131   0.02139
     Eigenvalues ---    0.02143   0.02144   0.02147   0.02148   0.02152
     Eigenvalues ---    0.02152   0.02156   0.02173   0.02184   0.02194
     Eigenvalues ---    0.02203   0.02210   0.02756   0.06389   0.07336
     Eigenvalues ---    0.11388   0.13891   0.15906   0.15998   0.15999
     Eigenvalues ---    0.15999   0.16000   0.16000   0.16000   0.16000
     Eigenvalues ---    0.16000   0.16000   0.16000   0.16000   0.16000
     Eigenvalues ---    0.16000   0.16000   0.16081   0.20722   0.22000
     Eigenvalues ---    0.22000   0.22000   0.22000   0.22018   0.22207
     Eigenvalues ---    0.22957   0.22959   0.23471   0.23982   0.24000
     Eigenvalues ---    0.24461   0.24982   0.24998   0.25000   0.25000
     Eigenvalues ---    0.25000   0.25000   0.27278   0.31466   0.32768
     Eigenvalues ---    0.33648   0.33907   0.34208   0.35019   0.35131
     Eigenvalues ---    0.35211   0.35261   0.35274   0.35277   0.35363
     Eigenvalues ---    0.35383   0.35408   0.35436   0.35460   0.35500
     Eigenvalues ---    0.35582   0.35624   0.37109   0.37388   0.40938
     Eigenvalues ---    0.40980   0.41446   0.41635   0.41956   0.41976
     Eigenvalues ---    0.42005   0.44623   0.44747   0.44997   0.45305
     Eigenvalues ---    0.45836   0.45925   0.46031   0.46266   0.46356
     Eigenvalues ---    0.46551   0.47575   0.48019   0.52537   0.52786
     Eigenvalues ---    0.54074   0.54159   0.967971000.000001000.00000
     Eigenvalues --- 1000.000001000.000001000.000001000.000001000.00000
     Eigenvalues --- 1000.000001000.000001000.000001000.000001000.00000
     Eigenvalues --- 1000.000001000.000001000.000001000.000001000.00000
     Eigenvalues --- 1000.000001000.000001000.000001000.000001000.00000
     Eigenvalues --- 1000.000001000.000001000.000001000.000001000.00000
     Eigenvalues --- 1000.000001000.000001000.000001000.000001000.00000
     Eigenvalues --- 1000.000001000.000001000.000001000.000001000.00000
     Eigenvalues --- 1000.000001000.000001000.000001000.000001000.00000
     Eigenvalues --- 1000.000001000.000001000.000001000.000001000.00000
     Eigenvalues --- 1000.000001000.000001000.000001000.000001000.00000
     Eigenvalues --- 1000.000001000.000001000.000001000.000001000.00000
     Eigenvalues --- 1000.000001000.000001000.000001000.000001000.00000
     Eigenvalues --- 1000.000001000.000001000.000001000.000001000.00000
     Eigenvalues --- 1000.000001000.000001000.000001000.000001000.00000
     Eigenvalues --- 1000.000001000.000001000.000001000.000001000.00000
     Eigenvalues --- 1000.000001000.000001000.000001000.000001000.00000
     Eigenvalues --- 1000.000001000.000001000.000001000.000001000.00000
     Eigenvalues --- 1000.000001000.000001000.000001000.000001000.00000
     Eigenvalues --- 1000.000001000.00000
 RFO step:  Lambda=-4.70958646D-03 EMin= 6.48870318D-03
 Quartic linear search produced a step of  0.37749.
 Iteration  1 RMS(Cart)=  0.09656582 RMS(Int)=  0.00149676
 Iteration  2 RMS(Cart)=  0.00426802 RMS(Int)=  0.00000849
 Iteration  3 RMS(Cart)=  0.00000205 RMS(Int)=  0.00000844
 Iteration  4 RMS(Cart)=  0.00000000 RMS(Int)=  0.00000844
 Variable       Old X    -DE/DX   Delta X   Delta X   Delta X     New X
                                 (Linear)    (Quad)   (Total)
    R1        2.61609   0.00110   0.00136   0.00164   0.00300   2.61909
    R2        2.66713  -0.00086  -0.00110  -0.00138  -0.00248   2.66465
    R3        2.05205  -0.00094   0.00036  -0.00405  -0.00369   2.04836
    R4        2.65451  -0.00069  -0.00156  -0.00019  -0.00176   2.65275
    R5        2.05041  -0.00009   0.00009  -0.00044  -0.00035   2.05006
    R6        2.64910   0.00046   0.00132  -0.00019   0.00113   2.65023
    R7        2.57228   0.00000   0.00028  -0.00032  -0.00004   2.57224
    R8        2.63220  -0.00109  -0.00076  -0.00246  -0.00322   2.62899
    R9        2.04685   0.00009   0.00004   0.00028   0.00032   2.04718
   R10        2.64796  -0.00039  -0.00216   0.00123  -0.00093   2.64703
   R11        2.04937  -0.00021  -0.00155   0.00105  -0.00051   2.04886
   R12        2.80079   0.00913   0.01780   0.01197   0.02977   2.83056
   R13        2.70221   0.00009  -0.00009   0.00040   0.00031   2.70252
   R14        2.69193   0.03127   0.05349   0.01682   0.07031   2.76223
   R15        2.35987  -0.00916   0.01340  -0.02825  -0.01484   2.34502
   R16        2.62061  -0.03117  -0.06786  -0.04093  -0.10879   2.51182
   R17        2.04938  -0.00081   0.00038  -0.00355  -0.00317   2.04621
   R18        2.77793  -0.00767  -0.01944  -0.00807  -0.02751   2.75042
   R19        2.03736   0.00562   0.00580   0.01358   0.01937   2.05673
   R20        2.66298   0.00035   0.00321  -0.00257   0.00064   2.66362
   R21        2.66208   0.00103   0.00207   0.00073   0.00280   2.66487
   R22        2.62385   0.00094   0.00066   0.00203   0.00269   2.62653
   R23        2.05157   0.00038   0.00084   0.00044   0.00128   2.05285
   R24        2.64605  -0.00075  -0.00116  -0.00089  -0.00205   2.64400
   R25        2.05615  -0.00013  -0.00011  -0.00036  -0.00047   2.05568
   R26        2.64856   0.00051   0.00148  -0.00028   0.00119   2.64975
   R27        2.57358   0.00000  -0.00011   0.00013   0.00002   2.57360
   R28        2.62201  -0.00105  -0.00158  -0.00128  -0.00286   2.61915
   R29        2.04957   0.00006  -0.00006   0.00032   0.00025   2.04982
   R30        2.04782   0.00066  -0.00040   0.00301   0.00261   2.05043
   R31        1.82665  -0.00007   0.00001  -0.00019  -0.00017   1.82647
   R32        2.85139   0.00003   0.00003   0.00007   0.00010   2.85150
   R33        2.07478  -0.00003  -0.00003  -0.00008  -0.00012   2.07466
   R34        2.07917  -0.00003  -0.00004  -0.00008  -0.00012   2.07905
   R35        2.64642   0.00002   0.00000   0.00007   0.00007   2.64649
   R36        2.64216  -0.00001   0.00001  -0.00003  -0.00002   2.64214
   R37        2.63384  -0.00001   0.00002  -0.00006  -0.00004   2.63380
   R38        2.05087   0.00001  -0.00001   0.00004   0.00003   2.05090
   R39        2.63989   0.00000   0.00000  -0.00001  -0.00001   2.63989
   R40        2.05259   0.00001   0.00002   0.00001   0.00003   2.05262
   R41        2.63544   0.00000   0.00000   0.00000   0.00000   2.63544
   R42        2.05233   0.00000   0.00002  -0.00002   0.00000   2.05233
   R43        2.63818   0.00000   0.00003  -0.00005  -0.00002   2.63816
   R44        2.05237   0.00000   0.00002  -0.00002   0.00000   2.05237
   R45        2.05461   0.00000  -0.00001   0.00002   0.00001   2.05462
    A1        2.11967  -0.00048   0.00092  -0.00371  -0.00280   2.11687
    A2        2.07020  -0.00101  -0.00123  -0.00746  -0.00869   2.06151
    A3        2.09331   0.00149   0.00031   0.01117   0.01149   2.10480
    A4        2.09558  -0.00020  -0.00176   0.00171  -0.00005   2.09553
    A5        2.12107   0.00003   0.00118  -0.00191  -0.00073   2.12034
    A6        2.06654   0.00018   0.00058   0.00020   0.00078   2.06732
    A7        2.08631   0.00011  -0.00003   0.00083   0.00079   2.08710
    A8        2.01632   0.00038   0.00017   0.00174   0.00191   2.01823
    A9        2.18054  -0.00049  -0.00014  -0.00256  -0.00270   2.17784
   A10        2.08683   0.00006   0.00146  -0.00185  -0.00039   2.08643
   A11        2.11427  -0.00010  -0.00040  -0.00013  -0.00053   2.11374
   A12        2.08208   0.00004  -0.00105   0.00198   0.00093   2.08301
   A13        2.12698  -0.00015  -0.00180   0.00108  -0.00072   2.12626
   A14        2.08974   0.00160   0.00518   0.00601   0.01118   2.10092
   A15        2.06647  -0.00145  -0.00338  -0.00709  -0.01046   2.05601
   A16        2.05101   0.00066   0.00122   0.00195   0.00317   2.05418
   A17        2.15388   0.00316  -0.00185   0.01947   0.01762   2.17150
   A18        2.07829  -0.00382   0.00063  -0.02141  -0.02079   2.05751
   A19        2.07083   0.00003  -0.00016   0.00038   0.00022   2.07104
   A20        2.12944  -0.00860  -0.04115   0.00664  -0.03451   2.09493
   A21        2.04507   0.00969   0.00702   0.04329   0.05031   2.09538
   A22        2.10867  -0.00109   0.03413  -0.04993  -0.01580   2.09287
   A23        2.12044  -0.00335   0.00994  -0.03374  -0.02380   2.09664
   A24        2.11027  -0.00133   0.00008  -0.01556  -0.01548   2.09478
   A25        2.05238   0.00469  -0.01002   0.04936   0.03933   2.09171
   A26        2.15516   0.01444   0.02743   0.05202   0.07944   2.23460
   A27        2.05562  -0.00691  -0.01688  -0.01882  -0.03571   2.01991
   A28        2.07240  -0.00753  -0.01055  -0.03318  -0.04373   2.02866
   A29        2.05237   0.00277   0.00094   0.01376   0.01469   2.06707
   A30        2.17666  -0.00141   0.00133  -0.00933  -0.00800   2.16866
   A31        2.05410  -0.00136  -0.00227  -0.00438  -0.00665   2.04744
   A32        2.12212   0.00074   0.00186   0.00226   0.00411   2.12623
   A33        2.06541   0.00118   0.00356   0.00528   0.00884   2.07425
   A34        2.09565  -0.00191  -0.00542  -0.00754  -0.01296   2.08269
   A35        2.08783  -0.00011  -0.00095   0.00059  -0.00036   2.08747
   A36        2.10140  -0.00006   0.00060  -0.00149  -0.00088   2.10051
   A37        2.09396   0.00018   0.00035   0.00089   0.00124   2.09520
   A38        2.09191  -0.00033  -0.00019  -0.00189  -0.00209   2.08982
   A39        2.14175   0.00070   0.00045   0.00338   0.00383   2.14559
   A40        2.04952  -0.00037  -0.00026  -0.00149  -0.00175   2.04777
   A41        2.09395   0.00042   0.00167  -0.00025   0.00142   2.09536
   A42        2.07378  -0.00026  -0.00057  -0.00068  -0.00126   2.07252
   A43        2.11545  -0.00016  -0.00110   0.00092  -0.00017   2.11528
   A44        2.11644   0.00064  -0.00011   0.00366   0.00355   2.11999
   A45        2.10401  -0.00100  -0.00074  -0.00636  -0.00710   2.09690
   A46        2.06266   0.00036   0.00086   0.00273   0.00358   2.06624
   A47        1.90762   0.00010   0.00064  -0.00013   0.00052   1.90814
   A48        1.90057   0.00006  -0.00013   0.00062   0.00049   1.90106
   A49        1.92350  -0.00001   0.00019  -0.00014   0.00005   1.92355
   A50        1.90449   0.00002   0.00016   0.00008   0.00025   1.90473
   A51        1.92726   0.00000  -0.00003   0.00007   0.00004   1.92730
   A52        1.92970  -0.00007  -0.00012  -0.00047  -0.00059   1.92911
   A53        1.87826  -0.00001  -0.00007  -0.00017  -0.00025   1.87801
   A54        2.10659   0.00002   0.00000   0.00010   0.00011   2.10670
   A55        2.09696  -0.00001   0.00008  -0.00014  -0.00006   2.09689
   A56        2.07904  -0.00002  -0.00008   0.00000  -0.00008   2.07896
   A57        2.10048   0.00000   0.00005  -0.00006  -0.00001   2.10047
   A58        2.08264   0.00001  -0.00010   0.00020   0.00010   2.08274
   A59        2.09996  -0.00001   0.00005  -0.00014  -0.00009   2.09987
   A60        2.09857   0.00001   0.00002   0.00004   0.00006   2.09863
   A61        2.08981   0.00000   0.00000  -0.00001  -0.00001   2.08980
   A62        2.09481  -0.00001  -0.00002  -0.00003  -0.00005   2.09476
   A63        2.08914  -0.00001  -0.00004   0.00001  -0.00003   2.08911
   A64        2.09696   0.00000   0.00003  -0.00004  -0.00001   2.09695
   A65        2.09707   0.00001   0.00002   0.00002   0.00004   2.09711
   A66        2.09468   0.00000   0.00001  -0.00004  -0.00003   2.09465
   A67        2.09766   0.00001  -0.00001   0.00007   0.00006   2.09772
   A68        2.09080   0.00000   0.00000  -0.00003  -0.00002   2.09078
   A69        2.10439   0.00002   0.00005   0.00004   0.00009   2.10449
   A70        2.08848  -0.00003  -0.00007  -0.00013  -0.00019   2.08829
   A71        2.09031   0.00001   0.00001   0.00009   0.00010   2.09041
    D1        0.00022   0.00002   0.00006   0.00102   0.00108   0.00131
    D2        3.14068   0.00002   0.00001   0.00098   0.00100  -3.14151
    D3        3.14125   0.00000   0.00004   0.00001   0.00006   3.14131
    D4       -0.00148   0.00000  -0.00001  -0.00003  -0.00003  -0.00151
    D5       -0.00040  -0.00003  -0.00009  -0.00143  -0.00152  -0.00192
    D6       -3.14115  -0.00004  -0.00002  -0.00233  -0.00235   3.13969
    D7       -3.14142  -0.00001  -0.00007  -0.00040  -0.00046   3.14131
    D8        0.00102  -0.00002   0.00001  -0.00130  -0.00130  -0.00028
    D9        0.00074   0.00000  -0.00002   0.00022   0.00020   0.00095
   D10        3.13766   0.00000  -0.00008   0.00060   0.00052   3.13818
   D11       -3.13975   0.00001   0.00003   0.00026   0.00029  -3.13946
   D12       -0.00283   0.00001  -0.00003   0.00064   0.00061  -0.00222
   D13       -0.00152  -0.00002   0.00000  -0.00100  -0.00100  -0.00252
   D14        3.13756  -0.00001  -0.00005  -0.00061  -0.00066   3.13690
   D15       -3.13796  -0.00002   0.00007  -0.00144  -0.00137  -3.13933
   D16        0.00112  -0.00002   0.00002  -0.00105  -0.00102   0.00009
   D17        3.11543   0.00001   0.00003   0.00043   0.00046   3.11589
   D18       -0.03112   0.00001  -0.00004   0.00085   0.00081  -0.03031
   D19        0.00136   0.00001  -0.00003   0.00058   0.00054   0.00190
   D20       -3.14139   0.00001  -0.00002   0.00083   0.00081  -3.14058
   D21       -3.13776   0.00000   0.00001   0.00019   0.00021  -3.13756
   D22        0.00267   0.00001   0.00003   0.00044   0.00047   0.00315
   D23       -0.00040   0.00002   0.00008   0.00062   0.00070   0.00030
   D24        3.14039   0.00003   0.00000   0.00150   0.00150  -3.14130
   D25       -3.14085   0.00001   0.00006   0.00036   0.00043  -3.14043
   D26       -0.00007   0.00002  -0.00002   0.00125   0.00123   0.00116
   D27        0.00832   0.00006   0.00013   0.00325   0.00339   0.01170
   D28       -3.13420   0.00002  -0.00009   0.00219   0.00209  -3.13211
   D29       -3.13241   0.00005   0.00021   0.00232   0.00254  -3.12988
   D30        0.00825   0.00001  -0.00001   0.00126   0.00124   0.00949
   D31       -3.09733   0.00005   0.00003   0.00230   0.00232  -3.09501
   D32        1.06935   0.00002   0.00002   0.00191   0.00193   1.07127
   D33       -0.98952   0.00002  -0.00010   0.00215   0.00205  -0.98747
   D34       -3.13405  -0.00002   0.00057  -0.00322  -0.00261  -3.13666
   D35       -0.00761   0.00004  -0.00012   0.00213   0.00199  -0.00562
   D36        0.00850   0.00001   0.00080  -0.00217  -0.00135   0.00715
   D37        3.13495   0.00007   0.00012   0.00317   0.00325   3.13819
   D38       -3.10699  -0.00080  -0.00367  -0.05248  -0.05611   3.12009
   D39        0.03900  -0.00072  -0.00201  -0.05474  -0.05672  -0.01773
   D40        0.04927  -0.00081  -0.00308  -0.05714  -0.06024  -0.01097
   D41       -3.08793  -0.00073  -0.00142  -0.05940  -0.06086   3.13440
   D42       -3.03145   0.00002   0.00145  -0.00896  -0.00750  -3.03894
   D43        0.12155  -0.00006   0.00135  -0.01414  -0.01280   0.10875
   D44        0.10571  -0.00006  -0.00022  -0.00664  -0.00685   0.09885
   D45       -3.02448  -0.00014  -0.00033  -0.01181  -0.01216  -3.03664
   D46       -3.13988  -0.00016  -0.00074  -0.00688  -0.00765   3.13566
   D47        0.00314  -0.00007  -0.00015  -0.00410  -0.00425  -0.00111
   D48       -0.00888  -0.00009  -0.00062  -0.00212  -0.00274  -0.01161
   D49        3.13414   0.00001  -0.00003   0.00066   0.00067   3.13481
   D50        3.13570   0.00024   0.00101   0.00877   0.00976  -3.13773
   D51        0.00851   0.00017   0.00090   0.00621   0.00709   0.01559
   D52        0.00552   0.00013   0.00089   0.00348   0.00438   0.00990
   D53       -3.12167   0.00007   0.00078   0.00092   0.00171  -3.11996
   D54        0.00541   0.00001   0.00007   0.00004   0.00011   0.00552
   D55       -3.13685   0.00000   0.00007  -0.00048  -0.00041  -3.13726
   D56       -3.13763  -0.00008  -0.00054  -0.00277  -0.00329  -3.14092
   D57        0.00329  -0.00010  -0.00054  -0.00329  -0.00381  -0.00052
   D58        0.00160   0.00003   0.00025   0.00080   0.00105   0.00265
   D59        3.14026  -0.00004  -0.00028  -0.00115  -0.00144   3.13883
   D60       -3.13933   0.00005   0.00024   0.00132   0.00157  -3.13775
   D61       -0.00066  -0.00003  -0.00028  -0.00063  -0.00092  -0.00158
   D62       -0.00486   0.00001   0.00002   0.00055   0.00057  -0.00430
   D63        3.13308  -0.00006  -0.00045  -0.00140  -0.00186   3.13122
   D64        3.13950   0.00008   0.00052   0.00239   0.00291  -3.14077
   D65       -0.00574   0.00001   0.00005   0.00044   0.00048  -0.00526
   D66       -0.00043   0.00003   0.00020   0.00096   0.00116   0.00073
   D67        3.13830  -0.00004  -0.00032  -0.00095  -0.00127   3.13703
   D68        0.00120  -0.00010  -0.00061  -0.00275  -0.00338  -0.00218
   D69        3.12873  -0.00005  -0.00052  -0.00032  -0.00085   3.12788
   D70       -3.13665  -0.00003  -0.00013  -0.00075  -0.00089  -3.13754
   D71       -0.00913   0.00003  -0.00003   0.00168   0.00165  -0.00748
   D72        0.76466  -0.00001  -0.00014  -0.00073  -0.00087   0.76379
   D73       -2.41452  -0.00002  -0.00013  -0.00175  -0.00188  -2.41640
   D74        2.87886   0.00002   0.00000  -0.00047  -0.00047   2.87840
   D75       -0.30031   0.00000   0.00001  -0.00149  -0.00147  -0.30179
   D76       -1.32760  -0.00004  -0.00019  -0.00094  -0.00112  -1.32872
   D77        1.77641  -0.00005  -0.00018  -0.00196  -0.00213   1.77428
   D78        3.10462  -0.00002  -0.00001  -0.00128  -0.00129   3.10333
   D79       -0.05266  -0.00002  -0.00003  -0.00092  -0.00095  -0.05361
   D80        0.00023  -0.00001  -0.00003  -0.00027  -0.00030  -0.00006
   D81        3.12614   0.00000  -0.00004   0.00009   0.00005   3.12618
   D82       -3.09603   0.00002   0.00001   0.00112   0.00112  -3.09491
   D83        0.04867   0.00001  -0.00001   0.00051   0.00050   0.04917
   D84        0.00857   0.00001   0.00002   0.00012   0.00013   0.00871
   D85       -3.12992  -0.00001   0.00001  -0.00050  -0.00049  -3.13041
   D86       -0.00783   0.00001   0.00002   0.00024   0.00025  -0.00758
   D87        3.13509   0.00001   0.00001   0.00030   0.00031   3.13540
   D88       -3.13358   0.00000   0.00004  -0.00013  -0.00010  -3.13367
   D89        0.00934   0.00000   0.00002  -0.00006  -0.00004   0.00930
   D90        0.00664   0.00000   0.00000  -0.00004  -0.00004   0.00659
   D91       -3.13965   0.00000  -0.00001   0.00007   0.00007  -3.13958
   D92       -3.13629   0.00000   0.00001  -0.00011  -0.00010  -3.13639
   D93        0.00061   0.00000   0.00001   0.00000   0.00001   0.00062
   D94        0.00213   0.00000  -0.00001  -0.00011  -0.00012   0.00201
   D95        3.13323   0.00000   0.00000   0.00014   0.00014   3.13336
   D96       -3.13477   0.00000   0.00000  -0.00023  -0.00023  -3.13500
   D97       -0.00367   0.00000   0.00000   0.00002   0.00003  -0.00364
   D98       -0.00979   0.00000   0.00000   0.00007   0.00007  -0.00972
   D99        3.12870   0.00001   0.00001   0.00069   0.00070   3.12939
   D100      -3.14093   0.00000  -0.00001  -0.00018  -0.00018  -3.14112
   D101      -0.00245   0.00001   0.00001   0.00044   0.00044  -0.00201
         Item               Value     Threshold  Converged?
 Maximum Force            0.031274     0.000450     NO 
 RMS     Force            0.003586     0.000300     NO 
 Maximum Displacement     0.371623     0.001800     NO 
 RMS     Displacement     0.096517     0.001200     NO 
 Predicted change in Energy=-4.945835D-03
 GradGradGradGradGradGradGradGradGradGradGradGradGradGradGradGradGradGrad

                          Input orientation:                          
 ---------------------------------------------------------------------
 Center     Atomic      Atomic             Coordinates (Angstroms)
 Number     Number       Type             X           Y           Z
 ---------------------------------------------------------------------
      1          6           0        0.110453    0.066445   -0.057964
      2          6           0        0.073866    0.064048    1.327514
      3          6           0        1.269050    0.020354    2.062509
      4          6           0        2.496845   -0.019581    1.385926
      5          6           0        2.513873   -0.018403   -0.005169
      6          6           0        1.333580    0.024008   -0.758300
      7          8           0        1.128367    0.025862    3.416380
      8          6           0        1.454683    0.021273   -2.251259
      9          6           0        0.253885    0.079322   -3.082712
     10          6           0        0.358819    0.071340   -4.407736
     11          6           0       -0.712743    0.097954   -5.392321
     12          6           0       -0.376811   -0.043766   -6.753876
     13          6           0       -1.343938   -0.035563   -7.752085
     14          6           0       -2.690798    0.123591   -7.408226
     15          6           0       -3.051545    0.276332   -6.061876
     16          6           0       -2.076992    0.264332   -5.076441
     17          8           0       -3.692841    0.144831   -8.330295
     18          6           0        2.303178   -0.049334    4.228404
     19          6           0        1.892818   -0.093842    5.679800
     20          6           0        0.832272   -0.907019    6.098462
     21          6           0        0.488786   -0.977328    7.447390
     22          6           0        1.206058   -0.243453    8.395265
     23          6           0        2.264010    0.567416    7.985163
     24          6           0        2.600702    0.645095    6.632548
     25          1           0       -0.831191    0.100483   -0.593767
     26          1           0       -0.865280    0.096543    1.869577
     27          1           0        3.434107   -0.049377    1.928358
     28          1           0        3.455362   -0.049951   -0.541935
     29          1           0       -0.724188    0.119074   -2.619826
     30          1           0        0.667651   -0.167005   -7.025915
     31          1           0       -1.058094   -0.150875   -8.795323
     32          1           0       -4.099346    0.408349   -5.814285
     33          1           0       -2.385039    0.397747   -4.044636
     34          1           0       -3.316891    0.034763   -9.213880
     35          1           0        2.950762    0.816885    4.039712
     36          1           0        2.869944   -0.953236    3.959803
     37          1           0        0.271179   -1.470946    5.360214
     38          1           0       -0.339245   -1.606781    7.760403
     39          1           0        0.938244   -0.300851    9.446207
     40          1           0        2.822169    1.147310    8.714359
     41          1           0        3.418897    1.287289    6.315883
     42          8           0        2.574408   -0.027875   -2.783907
     43          1           0        1.373003    0.037433   -4.801241
 ---------------------------------------------------------------------
                    Distance matrix (angstroms):
                    1          2          3          4          5
     1  C    0.000000
     2  C    1.385962   0.000000
     3  C    2.416790   1.403777   0.000000
     4  C    2.790535   2.425125   1.402442   0.000000
     5  C    2.405497   2.781452   2.413790   1.391199   0.000000
     6  C    1.410075   2.437026   2.821549   2.439834   1.400749
     7  O    3.620616   2.340255   1.361172   2.448988   3.691692
     8  C    2.572847   3.836157   4.317761   3.783766   2.483622
     9  C    3.028174   4.413924   5.244743   5.000937   3.819472
    10  C    4.356860   5.742328   6.534155   6.176239   4.902540
    11  C    5.397593   6.765802   7.714143   7.500660   6.280605
    12  C    6.714523   8.094664   8.968924   8.632199   7.341781
    13  C    7.831039   9.190169  10.156628   9.912372   8.654347
    14  C    7.866170   9.162972  10.265762  10.211232   9.050637
    15  C    6.788906   8.025979   9.205362   9.292037   8.230702
    16  C    5.478064   6.758471   7.887973   7.922296   6.846443
    17  O    9.105090  10.366671  11.517214  11.521467  10.385455
    18  C    4.816056   3.660308   2.401121   2.849224   4.238926
    19  C    6.010362   4.719737   3.672455   4.336787   5.719290
    20  C    6.274570   4.927484   4.164098   5.076057   6.393101
    21  C    7.587023   6.221696   5.531828   6.456851   7.782104
    22  C    8.529564   7.164462   6.338561   7.130714   8.504606
    23  C    8.341503   7.026692   6.030511   6.629383   8.015674
    24  C    7.162340   5.904736   4.800923   5.289577   6.671361
    25  H    1.083945   2.124094   3.387216   3.874200   3.398535
    26  H    2.160642   1.084843   2.144385   3.398719   3.866078
    27  H    3.873702   3.415420   2.170330   1.083319   2.141568
    28  H    3.381744   3.865533   3.401181   2.153212   1.084211
    29  H    2.694909   4.027581   5.089892   5.142016   4.164177
    30  H    6.994091   8.377692   9.110226   8.609689   7.260957
    31  H    8.817833  10.188196  11.105739  10.784835   9.489115
    32  H    7.139646   8.278861   9.540131   9.774247   8.812640
    33  H    4.714955   5.917564   7.126851   7.314230   6.363161
    34  H    9.776426  11.073350  12.173249  12.089597  10.899587
    35  H    5.041970   4.024837   2.715134   2.819272   4.153268
    36  H    4.979658   3.972640   2.666546   2.763288   4.089218
    37  H    5.634364   4.319469   3.754275   4.780693   5.993905
    38  H    8.008044   6.659159   6.140047   7.155178   8.424211
    39  H    9.547220   8.172728   7.398081   8.214407   9.585974
    40  H    9.245286   7.955634   6.923101   7.427880   8.802505
    41  H    7.284380   6.129387   4.931345   5.182912   6.517638
    42  O    3.675696   4.812997   5.019366   4.170562   2.779413
    43  H    4.908518   6.264989   6.864558   6.288664   4.930214
                    6          7          8          9         10
     6  C    0.000000
     7  O    4.179721   0.000000
     8  C    1.497866   5.677027   0.000000
     9  C    2.563531   6.557879   1.461711   0.000000
    10  C    3.777669   7.862001   2.419466   1.329196   0.000000
    11  C    5.066267   8.999338   3.817052   2.503799   1.455460
    12  C    6.235140  10.281270   4.861292   3.726979   2.461458
    13  C    7.489038  11.438999   6.172082   4.936526   3.754396
    14  C    7.773484  11.479010   6.617386   5.232895   4.278533
    15  C    6.886284  10.362033   5.906940   4.454223   3.795891
    16  C    5.507822   9.080705   4.529178   3.072812   2.533296
    17  O    9.089258  12.698133   7.966614   6.566435   5.639843
    18  C    5.080622   1.430111   6.535363   7.593983   8.853135
    19  C    6.463417   2.392025   7.943986   8.916148  10.204842
    20  C    6.937817   2.855084   8.424190   9.252100  10.562269
    21  C    8.309614   4.202915   9.797651  10.585590  11.902125
    22  C    9.158359   4.986768  10.652717  11.521925  12.834864
    23  C    8.809604   4.738855  10.282880  11.259516  12.548298
    24  C    7.524359   3.590955   8.979117  10.010690  11.280208
    25  H    2.172361   4.463935   2.824673   2.715269   3.995414
    26  H    3.427241   2.524326   4.729608   5.077203   6.395601
    27  H    3.411118   2.745234   4.625182   5.936429   7.044008
    28  H    2.134068   4.592267   2.632410   4.089219   4.954564
    29  H    2.776459   6.314779   2.211987   1.082806   2.090886
    30  H    6.305787  10.454232   4.842747   3.972496   2.647083
    31  H    8.387159  12.407157   7.012022   5.865851   4.616053
    32  H    7.431513  10.615105   6.610009   5.149793   4.686917
    33  H    4.976727   8.255246   4.254574   2.826767   2.786959
    34  H    9.650069  13.389693   8.440746   7.095326   6.050720
    35  H    5.124924   2.082159   6.515180   7.651540   8.867546
    36  H    5.057264   2.070515   6.444372   7.583334   8.796090
    37  H    6.387471   2.598787   7.846141   8.584092   9.889346
    38  H    8.833239   4.867231  10.300588  10.989444  12.303128
    39  H   10.217327   6.041664  11.713291  12.553353  13.871048
    40  H    9.654479   5.674081  11.107779  12.120543  13.394595
    41  H    7.482546   3.904465   8.880139   9.990499  11.217781
    42  O    2.376012   6.366905   1.240932   2.342136   2.748726
    43  H    4.043156   8.221270   2.551340   2.051224   1.088377
                   11         12         13         14         15
    11  C    0.000000
    12  C    1.409528   0.000000
    13  C    2.446370   1.389901   0.000000
    14  C    2.824400   2.410544   1.399143   0.000000
    15  C    2.439286   2.781282   2.422810   1.402187   0.000000
    16  C    1.410190   2.408179   2.790408   2.415324   1.385994
    17  O    4.185077   3.676509   2.425739   1.361893   2.360991
    18  C   10.083443  11.304550  12.523329  12.664157  11.604696
    19  C   11.376185  12.639226  13.816495  13.869147  12.745615
    20  C   11.637660  12.937917  14.047526  13.996600  12.820225
    21  C   12.940559  14.258217  15.338508  15.231911  14.021621
    22  C   13.924649  15.232919  16.348780  16.280987  15.079996
    23  C   13.712714  14.986219  16.156790  16.177254  15.021956
    24  C   12.485021  13.730858  14.931214  15.013836  13.900801
    25  H    4.800016   6.178529   7.177949   7.063677   5.904330
    26  H    7.263500   8.638416   9.634467   9.455733   8.229218
    27  H    8.414892   9.481788  10.795410  11.167640  10.296291
    28  H    6.396970   7.298890   8.661395   9.216906   8.539090
    29  H    2.772598   4.151814   5.171855   5.176519   4.158008
    30  H    2.155069   1.086321   2.142683   3.392608   3.867601
    31  H    3.429520   2.154791   1.087818   2.159882   3.409998
    32  H    3.426875   3.865812   3.397705   2.146099   1.084719
    33  H    2.168571   3.401161   3.875155   3.388567   2.127963
    34  H    4.624921   3.834300   2.456488   1.913183   3.172364
    35  H   10.144031  11.327621  12.578458  12.781359  11.762736
    36  H   10.069899  11.231717  12.480676  12.700925  11.705124
    37  H   10.910846  12.215069  13.289143  13.204125  12.023211
    38  H   13.267997  14.598243  15.624193  15.447048  14.211195
    39  H   14.935418  16.255404  17.351081  17.245928  16.023489
    40  H   14.580643  15.840405  17.026433  17.069814  15.924705
    41  H   12.472651  13.674711  14.911146  15.067639  14.003485
    42  O    4.198216   4.946777   6.327424   7.009256   6.518356
    43  H    2.168727   2.623209   4.011805   4.828900   4.606832
                   16         17         18         19         20
    16  C    0.000000
    17  O    3.634944   0.000000
    18  C   10.289044  13.918005   0.000000
    19  C   11.471024  15.084406   1.508948   0.000000
    20  C   11.606651  15.158235   2.529091   1.400462   0.000000
    21  C   12.844114  16.360947   3.809863   2.424093   1.393747
    22  C   13.875270  17.432565   4.313245   2.804955   2.419780
    23  C   13.767413  17.374027   3.807250   2.426880   2.789887
    24  C   12.614524  16.240247   2.520051   1.398161   2.412809
    25  H    4.655452   8.248932   5.753264   6.842195   6.969081
    26  H    7.052912  10.584651   3.952780   4.707563   4.666078
    27  H    8.918398  12.492840   2.563048   4.055967   4.989475
    28  H    7.160130  10.573235   4.907511   6.415096   7.190969
    29  H    2.808226   6.436072   7.489430   8.705047   8.915379
    30  H    3.394048   4.562076  11.373148  12.764857  13.146254
    31  H    3.878226   2.691762  13.450871  14.772959  15.032301
    32  H    2.157561   2.562224  11.918783  12.971979  12.960116
    33  H    1.085041   4.487893   9.519583  10.635148  10.720818
    34  H    4.325327   0.966528  14.570081  15.779078  15.892462
    35  H   10.425347  14.057247   1.097865   2.153732   3.420278
    36  H   10.373445  13.975780   1.100186   2.156785   2.954337
    37  H   10.837383  14.344136   2.725985   2.151340   1.085288
    38  H   13.088368  16.529528   4.677933   3.405877   2.150388
    39  H   14.843126  18.375244   5.399238   3.891001   3.403831
    40  H   14.661773  18.274861   4.671734   3.407741   3.875935
    41  H   12.690008  16.321537   2.718264   2.154308   3.398954
    42  O    5.193902   8.370822   7.017588   8.491363   9.094197
    43  H    3.468383   6.174831   9.077844  10.494744  10.953899
                   21         22         23         24         25
    21  C    0.000000
    22  C    1.396968   0.000000
    23  C    2.413888   1.394616   0.000000
    24  C    2.785033   2.416965   1.396053   0.000000
    25  H    8.219745   9.223414   9.132159   8.018361   0.000000
    26  H    5.839408   6.854971   6.885823   5.916065   2.463583
    27  H    6.324217   6.842715   6.199553   4.827656   4.957453
    28  H    8.572626   9.217936   8.632025   7.258563   4.289506
    29  H   10.199129  11.188811  11.027064   9.845710   2.028968
    30  H   14.497074  15.430765  15.113576  13.818458   6.609887
    31  H   16.337123  17.339298  17.121245  15.875754   8.208544
    32  H   14.101173  15.181682  15.196788  14.137551   6.166801
    33  H   11.925450  12.963728  12.898004  11.786477   3.796223
    34  H   17.120322  18.182861  18.089700  16.926302   8.971587
    35  H    4.570864   4.810317   4.012537   2.621994   6.023747
    36  H    4.223003   4.790159   4.345464   3.125815   5.961856
    37  H    2.155763   3.404742   3.875132   3.394575   6.255757
    38  H    1.086197   2.156311   3.399204   3.871213   8.541013
    39  H    2.157523   1.086047   2.155502   3.402243  10.202600
    40  H    3.400584   2.155889   1.086069   2.152953  10.054058
    41  H    3.872254   3.400538   2.153713   1.087260   8.198477
    42  O   10.484785  11.264668  10.789976   9.440509   4.051086
    43  H   12.322359  13.200550  12.828363  11.515556   4.750293
                   26         27         28         29         30
    26  H    0.000000
    27  H    4.302264   0.000000
    28  H    4.950232   2.470384   0.000000
    29  H    4.491677   6.164882   4.670636   0.000000
    30  H    9.030455   9.372626   7.058826   4.629543   0.000000
    31  H   10.669512  11.627016   9.407438   6.190406   2.471692
    32  H    8.342551  10.812536   9.223954   4.656172   4.952104
    33  H    6.113780   8.350990   6.824927   2.205939   4.304170
    34  H   11.351530  13.028143  11.003328   7.085956   4.550217
    35  H    4.448657   2.332777   4.690151   7.638170  11.341460
    36  H    4.407151   2.293908   4.628637   7.573583  11.231841
    37  H    3.991629   4.878792   6.855189   8.197558  12.460884
    38  H    6.154661   7.118739   9.260215  10.529763  14.890331
    39  H    7.798457   7.925316  10.303485  12.187254  16.474888
    40  H    7.845535   6.917828   9.354857  11.920473  15.941317
    41  H    6.288218   4.586643   6.987075   9.918507  13.699924
    42  O    5.788078   4.790092   2.408943   3.305942   4.652925
    43  H    7.036563   7.038692   4.741892   3.027118   2.342753
                   31         32         33         34         35
    31  H    0.000000
    32  H    4.295175   0.000000
    33  H    4.962942   2.463863   0.000000
    34  H    2.304737   3.508425   5.265092   0.000000
    35  H   13.481306  12.123209   9.695521  14.681720   0.000000
    36  H   13.370360  12.081296   9.670111  14.587632   1.773766
    37  H   14.278963  12.145068   9.949810  15.084616   3.762721
    38  H   16.635157  14.229240  12.147524  17.311479   5.526468
    39  H   18.351057  16.086109  13.911689  19.142039   5.876202
    40  H   17.981398  16.110088  13.801044  18.982823   4.688075
    41  H   15.825939  14.298165  11.908708  16.973898   2.370947
    42  O    7.024765   7.342511   5.134852   8.721002   6.886003
    43  H    4.679571   5.577673   3.850345   6.439448   9.014395
                   36         37         38         39         40
    36  H    0.000000
    37  H    2.997125   0.000000
    38  H    5.017029   2.480317   0.000000
    39  H    5.853008   4.302259   2.485834   0.000000
    40  H    5.198113   4.961159   4.299953   2.486352   0.000000
    41  H    3.297335   4.292936   4.958419   4.298227   2.475553
    42  O    6.813315   8.585687  11.052818  12.342092  11.560820
    43  H    8.943050  10.331718  12.783979  14.258093  13.638304
                   41         42         43
    41  H    0.000000
    42  O    9.233039   0.000000
    43  H   11.372699   2.348888   0.000000
 Stoichiometry    C22H18O3
 Framework group  C1[X(C22H18O3)]
 Deg. of freedom   123
 Full point group                 C1      NOp   1
 Largest Abelian subgroup         C1      NOp   1
 Largest concise Abelian subgroup C1      NOp   1
                         Standard orientation:                         
 ---------------------------------------------------------------------
 Center     Atomic      Atomic             Coordinates (Angstroms)
 Number     Number       Type             X           Y           Z
 ---------------------------------------------------------------------
      1          6           0       -0.096042   -0.356998   -0.086676
      2          6           0       -1.427785   -0.738697   -0.127381
      3          6           0       -2.439989    0.230170   -0.041764
      4          6           0       -2.094170    1.583497    0.083761
      5          6           0       -0.752096    1.947624    0.124806
      6          6           0        0.273901    0.997604    0.041803
      7          8           0       -3.714877   -0.243769   -0.094982
      8          6           0        1.688362    1.487539    0.095337
      9          6           0        2.795550    0.538197   -0.002044
     10          6           0        4.051459    0.970232    0.050877
     11          6           0        5.273911    0.182197   -0.003678
     12          6           0        6.505104    0.838703    0.196153
     13          6           0        7.714228    0.153917    0.165957
     14          6           0        7.722161   -1.224291   -0.075043
     15          6           0        6.512086   -1.900328   -0.286748
     16          6           0        5.313402   -1.205397   -0.251986
     17          8           0        8.866565   -1.961076   -0.122378
     18          6           0       -4.796999    0.684297    0.018703
     19          6           0       -6.099308   -0.077603   -0.001890
     20          6           0       -6.250613   -1.255300    0.740693
     21          6           0       -7.470943   -1.928492    0.752467
     22          6           0       -8.557202   -1.428714    0.030122
     23          6           0       -8.413566   -0.255800   -0.710550
     24          6           0       -7.187847    0.412182   -0.729933
     25          1           0        0.659551   -1.131171   -0.155029
     26          1           0       -1.716027   -1.779879   -0.226071
     27          1           0       -2.855013    2.352029    0.147450
     28          1           0       -0.469555    2.989804    0.222518
     29          1           0        2.593827   -0.520393   -0.107703
     30          1           0        6.504164    1.908830    0.383023
     31          1           0        8.650332    0.684036    0.327301
     32          1           0        6.537660   -2.967054   -0.481831
     33          1           0        4.394217   -1.753047   -0.432245
     34          1           0        9.625602   -1.383456    0.033802
     35          1           0       -4.763727    1.408553   -0.805708
     36          1           0       -4.693273    1.245713    0.959162
     37          1           0       -5.403853   -1.646465    1.295523
     38          1           0       -7.575577   -2.844204    1.327225
     39          1           0       -9.507944   -1.953548    0.041900
     40          1           0       -9.250583    0.135735   -1.281205
     41          1           0       -7.077013    1.320055   -1.317826
     42          8           0        1.921880    2.699908    0.220013
     43          1           0        4.177054    2.046731    0.150572
 ---------------------------------------------------------------------
 Rotational constants (GHZ):      0.8389397      0.0502540      0.0477692
 Standard basis: 6-31G(d,p) (6D, 7F)
 There are   465 symmetry adapted basis functions of A   symmetry.
 Integral buffers will be    262144 words long.
 Raffenetti 2 integral format.
 Two-electron integral symmetry is turned on.
   465 basis functions,   826 primitive gaussians,   465 cartesian basis functions
    87 alpha electrons       87 beta electrons
       nuclear repulsion energy      1777.7498838386 Hartrees.
 NAtoms=   43 NActive=   43 NUniq=   43 SFac= 7.50D-01 NAtFMM=   80 NAOKFM=F Big=F
 One-electron integrals computed using PRISM.
 NBasis=   465 RedAO= T  NBF=   465
 NBsUse=   465 1.00D-06 NBFU=   465
 Initial guess read from the read-write file.
 B after Tr=     0.000000    0.000000    0.000000
         Rot=    1.000000    0.000000    0.000000    0.000000 Ang=   0.00 deg.
 Initial guess orbital symmetries:
       Occupied  (A) (A) (A) (A) (A) (A) (A) (A) (A) (A) (A) (A)
                 (A) (A) (A) (A) (A) (A) (A) (A) (A) (A) (A) (A)
                 (A) (A) (A) (A) (A) (A) (A) (A) (A) (A) (A) (A)
                 (A) (A) (A) (A) (A) (A) (A) (A) (A) (A) (A) (A)
                 (A) (A) (A) (A) (A) (A) (A) (A) (A) (A) (A) (A)
                 (A) (A) (A) (A) (A) (A) (A) (A) (A) (A) (A) (A)
                 (A) (A) (A) (A) (A) (A) (A) (A) (A) (A) (A) (A)
                 (A) (A) (A)
       Virtual   (A) (A) (A) (A) (A) (A) (A) (A) (A) (A) (A) (A)
                 (A) (A) (A) (A) (A) (A) (A) (A) (A) (A) (A) (A)
                 (A) (A) (A) (A) (A) (A) (A) (A) (A) (A) (A) (A)
                 (A) (A) (A) (A) (A) (A) (A) (A) (A) (A) (A) (A)
                 (A) (A) (A) (A) (A) (A) (A) (A) (A) (A) (A) (A)
                 (A) (A) (A) (A) (A) (A) (A) (A) (A) (A) (A) (A)
                 (A) (A) (A) (A) (A) (A) (A) (A) (A) (A) (A) (A)
                 (A) (A) (A) (A) (A) (A) (A) (A) (A) (A) (A) (A)
                 (A) (A) (A) (A) (A) (A) (A) (A) (A) (A) (A) (A)
                 (A) (A) (A) (A) (A) (A) (A) (A) (A) (A) (A) (A)
                 (A) (A) (A) (A) (A) (A) (A) (A) (A) (A) (A) (A)
                 (A) (A) (A) (A) (A) (A) (A) (A) (A) (A) (A) (A)
                 (A) (A) (A) (A) (A) (A) (A) (A) (A) (A) (A) (A)
                 (A) (A) (A) (A) (A) (A) (A) (A) (A) (A) (A) (A)
                 (A) (A) (A) (A) (A) (A) (A) (A) (A) (A) (A) (A)
                 (A) (A) (A) (A) (A) (A) (A) (A) (A) (A) (A) (A)
                 (A) (A) (A) (A) (A) (A) (A) (A) (A) (A) (A) (A)
                 (A) (A) (A) (A) (A) (A) (A) (A) (A) (A) (A) (A)
                 (A) (A) (A) (A) (A) (A) (A) (A) (A) (A) (A) (A)
                 (A) (A) (A) (A) (A) (A) (A) (A) (A) (A) (A) (A)
                 (A) (A) (A) (A) (A) (A) (A) (A) (A) (A) (A) (A)
                 (A) (A) (A) (A) (A) (A) (A) (A) (A) (A) (A) (A)
                 (A) (A) (A) (A) (A) (A) (A) (A) (A) (A) (A) (A)
                 (A) (A) (A) (A) (A) (A) (A) (A) (A) (A) (A) (A)
                 (A) (A) (A) (A) (A) (A) (A) (A) (A) (A) (A) (A)
                 (A) (A) (A) (A) (A) (A) (A) (A) (A) (A) (A) (A)
                 (A) (A) (A) (A) (A) (A) (A) (A) (A) (A) (A) (A)
                 (A) (A) (A) (A) (A) (A) (A) (A) (A) (A) (A) (A)
                 (A) (A) (A) (A) (A) (A) (A) (A) (A) (A) (A) (A)
                 (A) (A) (A) (A) (A) (A) (A) (A) (A) (A) (A) (A)
                 (A) (A) (A) (A) (A) (A) (A) (A) (A) (A) (A) (A)
                 (A) (A) (A) (A) (A) (A)
 Harris functional with IExCor=  402 diagonalized for initial guess.
 ExpMin= 1.61D-01 ExpMax= 5.48D+03 ExpMxC= 8.25D+02 IAcc=1 IRadAn=         1 AccDes= 0.00D+00
 HarFok:  IExCor=  402 AccDes= 0.00D+00 IRadAn=         1 IDoV= 1
 ScaDFX=  1.000000  1.000000  1.000000  1.000000
 FoFCou: FMM=F IPFlag=           0 FMFlag=      100000 FMFlg1=           0
         NFxFlg=           0 DoJE=T BraDBF=F KetDBF=T FulRan=T
         Omega=  0.000000  0.000000  1.000000  0.000000  0.000000 ICntrl=     500 IOpCl=  0
         NMat0=    1 NMatS0=    1 NMatT0=    0 NMatD0=    1 NMtDS0=    0 NMtDT0=    0
         I1Cent=           4 NGrid=           0.
 Petite list used in FoFCou.
 Requested convergence on RMS density matrix=1.00D-08 within 128 cycles.
 Requested convergence on MAX density matrix=1.00D-06.
 Requested convergence on             energy=1.00D-06.
 No special actions if energy rises.
 Integral accuracy reduced to 1.0D-05 until final iterations.
 Initial convergence to 1.0D-05 achieved.  Increase integral accuracy.
 SCF Done:  E(RB3LYP) =  -1074.86348191     A.U. after   13 cycles
             Convg  =    0.4051D-08             -V/T =  2.0094
 Calling FoFJK, ICntrl=      2127 FMM=F ISym2X=0 I1Cent= 0 IOpClX= 0 NMat=1 NMatS=1 NMatT=0.
 ***** Axes restored to original set *****
 -------------------------------------------------------------------
 Center     Atomic                   Forces (Hartrees/Bohr)
 Number     Number              X              Y              Z
 -------------------------------------------------------------------
      1        6           0.000645259   -0.000064148   -0.001932293
      2        6           0.000626941    0.000009984    0.000232757
      3        6          -0.000206823   -0.000028645    0.000259713
      4        6           0.000633454   -0.000011607   -0.000069317
      5        6           0.000708757   -0.000052917    0.000263133
      6        6          -0.001789380   -0.000057243   -0.000152876
      7        8           0.000077726    0.000013259   -0.000367284
      8        6           0.017337809    0.000307041    0.001383933
      9        6          -0.012412915    0.000544417    0.015936973
     10        6           0.001732287    0.000284797   -0.021330976
     11        6           0.000377178    0.000699552   -0.004942932
     12        6          -0.000093120    0.000190106    0.001776012
     13        6          -0.000605809   -0.000062787   -0.000018997
     14        6           0.000500328    0.000051169    0.000043605
     15        6          -0.000313787    0.000131671    0.000369639
     16        6          -0.000734961   -0.000139749   -0.000260330
     17        8          -0.000275072   -0.000035787   -0.000168268
     18        6           0.000113764   -0.000018274    0.000165131
     19        6          -0.000075672   -0.000044138   -0.000022291
     20        6          -0.000001321    0.000017279    0.000002986
     21        6          -0.000019807   -0.000013188    0.000005573
     22        6           0.000004734   -0.000001864    0.000009837
     23        6           0.000000739   -0.000020350   -0.000017441
     24        6           0.000035125   -0.000002090   -0.000018026
     25        1          -0.000313461   -0.000021842   -0.000050769
     26        1          -0.000044745    0.000004902   -0.000175817
     27        1          -0.000091121    0.000042337    0.000075648
     28        1           0.000215631   -0.000017131   -0.000365357
     29        1          -0.000427268   -0.000472277    0.002304427
     30        1           0.000038546   -0.000014964   -0.000148007
     31        1           0.000166677    0.000019149    0.000059386
     32        1          -0.000082361   -0.000018744   -0.000075646
     33        1           0.000504242   -0.000250719    0.000512933
     34        1           0.000024697   -0.000011233   -0.000007003
     35        1          -0.000050683    0.000018714    0.000002087
     36        1          -0.000015018    0.000009391    0.000023736
     37        1           0.000002959    0.000000576   -0.000000843
     38        1           0.000008052   -0.000004278   -0.000010476
     39        1           0.000002045   -0.000003496   -0.000007151
     40        1          -0.000007338    0.000002150   -0.000005375
     41        1          -0.000006585    0.000026344    0.000016180
     42        8          -0.006411505    0.000173992    0.007469923
     43        1           0.000221802   -0.001179355   -0.000766139
 -------------------------------------------------------------------
 Cartesian Forces:  Max     0.021330976 RMS     0.003191219

 GradGradGradGradGradGradGradGradGradGradGradGradGradGradGradGradGradGrad
 Berny optimization.
 Using GEDIIS/GDIIS optimizer.
 Internal  Forces:  Max     0.024991883 RMS     0.002121341
 Search for a local minimum.
 Step number   3 out of a maximum of  227
 All quantities printed in internal units (Hartrees-Bohrs-Radians)
 Mixed Optimization -- RFO/linear search
 Update second derivatives using D2CorX and points    1    2    3
 DE= -4.00D-03 DEPred=-4.95D-03 R= 8.09D-01
 SS=  1.41D+00  RLast= 2.27D-01 DXNew= 8.4853D-01 6.7997D-01
 Trust test= 8.09D-01 RLast= 2.27D-01 DXMaxT set to 6.80D-01
 Use linear search instead of GDIIS.
     Eigenvalues ---    0.00649   0.00801   0.00903   0.01033   0.01294
     Eigenvalues ---    0.01333   0.01516   0.01636   0.01777   0.01882
     Eigenvalues ---    0.01988   0.02037   0.02044   0.02058   0.02089
     Eigenvalues ---    0.02089   0.02095   0.02103   0.02104   0.02119
     Eigenvalues ---    0.02121   0.02125   0.02129   0.02131   0.02139
     Eigenvalues ---    0.02143   0.02143   0.02147   0.02148   0.02151
     Eigenvalues ---    0.02152   0.02156   0.02173   0.02184   0.02194
     Eigenvalues ---    0.02203   0.02210   0.02756   0.06385   0.07337
     Eigenvalues ---    0.11389   0.13893   0.15079   0.15998   0.15999
     Eigenvalues ---    0.15999   0.16000   0.16000   0.16000   0.16000
     Eigenvalues ---    0.16000   0.16000   0.16000   0.16000   0.16000
     Eigenvalues ---    0.16000   0.16004   0.16051   0.19432   0.22000
     Eigenvalues ---    0.22000   0.22000   0.22018   0.22027   0.22229
     Eigenvalues ---    0.22953   0.22962   0.23471   0.23948   0.24007
     Eigenvalues ---    0.24372   0.24981   0.25000   0.25000   0.25000
     Eigenvalues ---    0.25000   0.25167   0.28351   0.31466   0.32617
     Eigenvalues ---    0.33648   0.33907   0.35018   0.35131   0.35203
     Eigenvalues ---    0.35261   0.35274   0.35277   0.35353   0.35363
     Eigenvalues ---    0.35407   0.35435   0.35455   0.35474   0.35539
     Eigenvalues ---    0.35623   0.36551   0.37278   0.40852   0.40980
     Eigenvalues ---    0.41435   0.41624   0.41952   0.41956   0.41976
     Eigenvalues ---    0.43746   0.44658   0.44887   0.45039   0.45475
     Eigenvalues ---    0.45836   0.46031   0.46041   0.46356   0.46504
     Eigenvalues ---    0.46551   0.47583   0.48032   0.52509   0.52756
     Eigenvalues ---    0.53136   0.54077   0.987451000.000001000.00000
     Eigenvalues --- 1000.000001000.000001000.000001000.000001000.00000
     Eigenvalues --- 1000.000001000.000001000.000001000.000001000.00000
     Eigenvalues --- 1000.000001000.000001000.000001000.000001000.00000
     Eigenvalues --- 1000.000001000.000001000.000001000.000001000.00000
     Eigenvalues --- 1000.000001000.000001000.000001000.000001000.00000
     Eigenvalues --- 1000.000001000.000001000.000001000.000001000.00000
     Eigenvalues --- 1000.000001000.000001000.000001000.000001000.00000
     Eigenvalues --- 1000.000001000.000001000.000001000.000001000.00000
     Eigenvalues --- 1000.000001000.000001000.000001000.000001000.00000
     Eigenvalues --- 1000.000001000.000001000.000001000.000001000.00000
     Eigenvalues --- 1000.000001000.000001000.000001000.000001000.00000
     Eigenvalues --- 1000.000001000.000001000.000001000.000001000.00000
     Eigenvalues --- 1000.000001000.000001000.000001000.000001000.00000
     Eigenvalues --- 1000.000001000.000001000.000001000.000001000.00000
     Eigenvalues --- 1000.000001000.000001000.000001000.000001000.00000
     Eigenvalues --- 1000.000001000.000001000.000001000.000001000.00000
     Eigenvalues --- 1000.000001000.000001000.000001000.000001000.00000
     Eigenvalues --- 1000.000001000.000001000.000001000.000001000.00000
     Eigenvalues --- 1000.000001000.00000
 RFO step:  Lambda=-1.71977587D-03 EMin= 6.48865377D-03
 Quartic linear search produced a step of -0.15731.
 Iteration  1 RMS(Cart)=  0.02451206 RMS(Int)=  0.00011867
 Iteration  2 RMS(Cart)=  0.00043182 RMS(Int)=  0.00000706
 Iteration  3 RMS(Cart)=  0.00000011 RMS(Int)=  0.00000706
 Variable       Old X    -DE/DX   Delta X   Delta X   Delta X     New X
                                 (Linear)    (Quad)   (Total)
    R1        2.61909   0.00025  -0.00047   0.00129   0.00082   2.61991
    R2        2.66465  -0.00183   0.00039  -0.00435  -0.00396   2.66069
    R3        2.04836   0.00030   0.00058  -0.00023   0.00035   2.04871
    R4        2.65275   0.00029   0.00028  -0.00005   0.00023   2.65298
    R5        2.05006  -0.00005   0.00006  -0.00020  -0.00015   2.04991
    R6        2.65023   0.00021  -0.00018   0.00087   0.00070   2.65093
    R7        2.57224  -0.00023   0.00001  -0.00035  -0.00035   2.57190
    R8        2.62899  -0.00017   0.00051  -0.00118  -0.00067   2.62832
    R9        2.04718  -0.00004  -0.00005  -0.00001  -0.00006   2.04712
   R10        2.64703   0.00081   0.00015   0.00105   0.00119   2.64823
   R11        2.04886   0.00037   0.00008   0.00059   0.00067   2.04953
   R12        2.83056  -0.00217  -0.00468   0.00471   0.00002   2.83058
   R13        2.70252   0.00008  -0.00005   0.00024   0.00019   2.70271
   R14        2.76223   0.01316  -0.01106   0.04335   0.03229   2.79452
   R15        2.34502  -0.00900   0.00234  -0.01103  -0.00870   2.33633
   R16        2.51182   0.02499   0.01711   0.02552   0.04264   2.55446
   R17        2.04621   0.00135   0.00050   0.00240   0.00290   2.04911
   R18        2.75042   0.00231   0.00433  -0.00330   0.00103   2.75145
   R19        2.05673   0.00052  -0.00305   0.00685   0.00380   2.06053
   R20        2.66362  -0.00169  -0.00010  -0.00276  -0.00286   2.66076
   R21        2.66487   0.00038  -0.00044   0.00161   0.00117   2.66604
   R22        2.62653   0.00038  -0.00042   0.00140   0.00098   2.62751
   R23        2.05285   0.00008  -0.00020   0.00060   0.00040   2.05325
   R24        2.64400   0.00005   0.00032  -0.00052  -0.00020   2.64380
   R25        2.05568  -0.00002   0.00007  -0.00017  -0.00010   2.05558
   R26        2.64975   0.00013  -0.00019   0.00077   0.00058   2.65033
   R27        2.57360   0.00030   0.00000   0.00048   0.00048   2.57408
   R28        2.61915  -0.00011   0.00045  -0.00107  -0.00062   2.61853
   R29        2.04982   0.00006  -0.00004   0.00020   0.00016   2.04999
   R30        2.05043   0.00031  -0.00041   0.00139   0.00098   2.05141
   R31        1.82647   0.00002   0.00003  -0.00002   0.00001   1.82648
   R32        2.85150  -0.00003  -0.00002  -0.00005  -0.00007   2.85143
   R33        2.07466  -0.00002   0.00002  -0.00008  -0.00006   2.07461
   R34        2.07905  -0.00002   0.00002  -0.00009  -0.00007   2.07898
   R35        2.64649  -0.00001  -0.00001   0.00000  -0.00001   2.64648
   R36        2.64214   0.00000   0.00000   0.00000   0.00001   2.64215
   R37        2.63380   0.00000   0.00001  -0.00002  -0.00001   2.63379
   R38        2.05090   0.00000   0.00000   0.00000   0.00000   2.05089
   R39        2.63989   0.00000   0.00000   0.00001   0.00001   2.63989
   R40        2.05262  -0.00001   0.00000  -0.00001  -0.00002   2.05260
   R41        2.63544   0.00000   0.00000   0.00000   0.00000   2.63545
   R42        2.05233  -0.00001   0.00000  -0.00002  -0.00002   2.05232
   R43        2.63816  -0.00002   0.00000  -0.00003  -0.00003   2.63813
   R44        2.05237   0.00000   0.00000  -0.00001  -0.00001   2.05236
   R45        2.05462   0.00001   0.00000   0.00002   0.00002   2.05464
    A1        2.11687  -0.00088   0.00044  -0.00412  -0.00368   2.11319
    A2        2.06151   0.00032   0.00137  -0.00136   0.00000   2.06151
    A3        2.10480   0.00055  -0.00181   0.00548   0.00368   2.10848
    A4        2.09553   0.00047   0.00001   0.00161   0.00161   2.09714
    A5        2.12034  -0.00042   0.00012  -0.00190  -0.00179   2.11855
    A6        2.06732  -0.00006  -0.00012   0.00030   0.00017   2.06749
    A7        2.08710   0.00013  -0.00013   0.00087   0.00074   2.08785
    A8        2.01823  -0.00022  -0.00030  -0.00032  -0.00062   2.01761
    A9        2.17784   0.00009   0.00042  -0.00055  -0.00013   2.17772
   A10        2.08643  -0.00061   0.00006  -0.00192  -0.00185   2.08458
   A11        2.11374   0.00019   0.00008   0.00021   0.00029   2.11403
   A12        2.08301   0.00042  -0.00015   0.00171   0.00156   2.08457
   A13        2.12626  -0.00019   0.00011  -0.00093  -0.00082   2.12544
   A14        2.10092   0.00031  -0.00176   0.00507   0.00331   2.10423
   A15        2.05601  -0.00012   0.00165  -0.00414  -0.00249   2.05352
   A16        2.05418   0.00107  -0.00050   0.00449   0.00399   2.05817
   A17        2.17150   0.00002  -0.00277   0.00459   0.00181   2.17332
   A18        2.05751  -0.00109   0.00327  -0.00908  -0.00581   2.05170
   A19        2.07104   0.00044  -0.00003   0.00153   0.00150   2.07254
   A20        2.09493  -0.00182   0.00543  -0.01977  -0.01434   2.08059
   A21        2.09538  -0.00377  -0.00791   0.00154  -0.00638   2.08900
   A22        2.09287   0.00559   0.00249   0.01824   0.02072   2.11359
   A23        2.09664   0.00191   0.00374   0.00204   0.00577   2.10241
   A24        2.09478  -0.00290   0.00244  -0.01793  -0.01551   2.07928
   A25        2.09171   0.00099  -0.00619   0.01598   0.00978   2.10150
   A26        2.23460   0.00070  -0.01250   0.02700   0.01448   2.24909
   A27        2.01991   0.00030   0.00562  -0.00947  -0.00387   2.01604
   A28        2.02866  -0.00099   0.00688  -0.01756  -0.01069   2.01797
   A29        2.06707   0.00138  -0.00231   0.00874   0.00642   2.07349
   A30        2.16866  -0.00173   0.00126  -0.00768  -0.00643   2.16223
   A31        2.04744   0.00035   0.00105  -0.00102   0.00002   2.04746
   A32        2.12623  -0.00030  -0.00065  -0.00003  -0.00067   2.12556
   A33        2.07425   0.00029  -0.00139   0.00425   0.00286   2.07711
   A34        2.08269   0.00001   0.00204  -0.00423  -0.00219   2.08050
   A35        2.08747   0.00026   0.00006   0.00081   0.00087   2.08834
   A36        2.10051  -0.00031   0.00014  -0.00161  -0.00147   2.09904
   A37        2.09520   0.00005  -0.00020   0.00079   0.00060   2.09580
   A38        2.08982   0.00000   0.00033  -0.00034  -0.00002   2.08980
   A39        2.14559   0.00003  -0.00060   0.00106   0.00045   2.14604
   A40        2.04777  -0.00003   0.00028  -0.00071  -0.00043   2.04734
   A41        2.09536  -0.00056  -0.00022  -0.00129  -0.00151   2.09385
   A42        2.07252   0.00018   0.00020   0.00004   0.00023   2.07276
   A43        2.11528   0.00037   0.00003   0.00126   0.00129   2.11657
   A44        2.11999   0.00025  -0.00056   0.00189   0.00133   2.12132
   A45        2.09690  -0.00079   0.00112  -0.00595  -0.00483   2.09207
   A46        2.06624   0.00054  -0.00056   0.00410   0.00353   2.06977
   A47        1.90814  -0.00004  -0.00008   0.00004  -0.00004   1.90809
   A48        1.90106  -0.00009  -0.00008  -0.00028  -0.00036   1.90071
   A49        1.92355   0.00001  -0.00001  -0.00002  -0.00003   1.92352
   A50        1.90473   0.00004  -0.00004   0.00021   0.00017   1.90491
   A51        1.92730   0.00002  -0.00001   0.00009   0.00008   1.92738
   A52        1.92911   0.00000   0.00009  -0.00022  -0.00012   1.92898
   A53        1.87801   0.00002   0.00004   0.00023   0.00027   1.87828
   A54        2.10670   0.00002  -0.00002   0.00009   0.00007   2.10677
   A55        2.09689  -0.00003   0.00001  -0.00012  -0.00011   2.09679
   A56        2.07896   0.00001   0.00001   0.00002   0.00003   2.07899
   A57        2.10047   0.00000   0.00000   0.00002   0.00002   2.10049
   A58        2.08274   0.00000  -0.00002   0.00000  -0.00002   2.08272
   A59        2.09987   0.00000   0.00001  -0.00002   0.00000   2.09987
   A60        2.09863  -0.00001  -0.00001  -0.00003  -0.00004   2.09859
   A61        2.08980   0.00000   0.00000  -0.00002  -0.00001   2.08978
   A62        2.09476   0.00001   0.00001   0.00005   0.00005   2.09481
   A63        2.08911   0.00000   0.00000  -0.00001   0.00000   2.08911
   A64        2.09695   0.00000   0.00000   0.00001   0.00001   2.09696
   A65        2.09711   0.00000  -0.00001   0.00000  -0.00001   2.09711
   A66        2.09465   0.00002   0.00001   0.00005   0.00006   2.09470
   A67        2.09772   0.00000  -0.00001   0.00000   0.00000   2.09771
   A68        2.09078  -0.00001   0.00000  -0.00006  -0.00005   2.09072
   A69        2.10449  -0.00002  -0.00001  -0.00005  -0.00007   2.10442
   A70        2.08829   0.00003   0.00003   0.00009   0.00012   2.08841
   A71        2.09041  -0.00001  -0.00002  -0.00004  -0.00005   2.09036
    D1        0.00131  -0.00001  -0.00017  -0.00005  -0.00022   0.00108
    D2       -3.14151  -0.00001  -0.00016  -0.00001  -0.00017   3.14151
    D3        3.14131  -0.00001  -0.00001  -0.00029  -0.00030   3.14101
    D4       -0.00151  -0.00001   0.00000  -0.00024  -0.00024  -0.00175
    D5       -0.00192   0.00002   0.00024   0.00032   0.00055  -0.00136
    D6        3.13969   0.00002   0.00037   0.00004   0.00041   3.14009
    D7        3.14131   0.00002   0.00007   0.00056   0.00064  -3.14124
    D8       -0.00028   0.00002   0.00020   0.00029   0.00049   0.00021
    D9        0.00095   0.00000  -0.00003   0.00015   0.00012   0.00106
   D10        3.13818   0.00000  -0.00008   0.00008  -0.00001   3.13818
   D11       -3.13946   0.00000  -0.00004   0.00011   0.00006  -3.13940
   D12       -0.00222   0.00000  -0.00010   0.00003  -0.00006  -0.00228
   D13       -0.00252   0.00000   0.00016  -0.00052  -0.00036  -0.00288
   D14        3.13690  -0.00001   0.00010  -0.00076  -0.00065   3.13625
   D15       -3.13933   0.00000   0.00022  -0.00044  -0.00022  -3.13955
   D16        0.00009  -0.00001   0.00016  -0.00068  -0.00052  -0.00043
   D17        3.11589   0.00000  -0.00007   0.00007   0.00000   3.11589
   D18       -0.03031  -0.00001  -0.00013   0.00000  -0.00013  -0.03044
   D19        0.00190   0.00002  -0.00009   0.00081   0.00072   0.00262
   D20       -3.14058   0.00000  -0.00013   0.00032   0.00019  -3.14039
   D21       -3.13756   0.00003  -0.00003   0.00105   0.00101  -3.13655
   D22        0.00315   0.00001  -0.00007   0.00056   0.00048   0.00363
   D23        0.00030  -0.00003  -0.00011  -0.00070  -0.00081  -0.00051
   D24       -3.14130  -0.00003  -0.00024  -0.00044  -0.00067   3.14121
   D25       -3.14043  -0.00001  -0.00007  -0.00022  -0.00029  -3.14072
   D26        0.00116  -0.00001  -0.00019   0.00004  -0.00016   0.00100
   D27        0.01170  -0.00004  -0.00053   0.00038  -0.00014   0.01157
   D28       -3.13211   0.00010  -0.00033   0.00500   0.00466  -3.12746
   D29       -3.12988  -0.00004  -0.00040   0.00010  -0.00028  -3.13016
   D30        0.00949   0.00010  -0.00020   0.00472   0.00451   0.01400
   D31       -3.09501   0.00001  -0.00037   0.00129   0.00092  -3.09409
   D32        1.07127   0.00003  -0.00030   0.00137   0.00107   1.07235
   D33       -0.98747  -0.00002  -0.00032   0.00098   0.00066  -0.98681
   D34       -3.13666   0.00003   0.00041  -0.00017   0.00028  -3.13638
   D35       -0.00562   0.00022  -0.00031   0.00873   0.00841   0.00279
   D36        0.00715  -0.00010   0.00021  -0.00477  -0.00455   0.00261
   D37        3.13819   0.00009  -0.00051   0.00413   0.00358  -3.14141
   D38        3.12009   0.00069   0.00883   0.01907   0.02791  -3.13519
   D39       -0.01773   0.00082   0.00892   0.03002   0.03898   0.02125
   D40       -0.01097   0.00052   0.00948   0.01039   0.01984   0.00886
   D41        3.13440   0.00065   0.00957   0.02135   0.03091  -3.11788
   D42       -3.03894  -0.00016   0.00118  -0.01974  -0.01858  -3.05752
   D43        0.10875  -0.00029   0.00201  -0.02766  -0.02565   0.08310
   D44        0.09885  -0.00029   0.00108  -0.03073  -0.02964   0.06921
   D45       -3.03664  -0.00041   0.00191  -0.03865  -0.03672  -3.07336
   D46        3.13566  -0.00005   0.00120  -0.00556  -0.00438   3.13128
   D47       -0.00111  -0.00005   0.00067  -0.00446  -0.00382  -0.00492
   D48       -0.01161   0.00006   0.00043   0.00178   0.00221  -0.00940
   D49        3.13481   0.00006  -0.00010   0.00287   0.00277   3.13758
   D50       -3.13773   0.00004  -0.00153   0.00598   0.00443  -3.13330
   D51        0.01559  -0.00005  -0.00111   0.00184   0.00072   0.01631
   D52        0.00990  -0.00008  -0.00069  -0.00188  -0.00257   0.00733
   D53       -3.11996  -0.00018  -0.00027  -0.00603  -0.00628  -3.12624
   D54        0.00552   0.00000  -0.00002  -0.00029  -0.00032   0.00521
   D55       -3.13726  -0.00002   0.00006  -0.00099  -0.00093  -3.13819
   D56       -3.14092   0.00001   0.00052  -0.00137  -0.00087   3.14140
   D57       -0.00052  -0.00001   0.00060  -0.00208  -0.00148  -0.00200
   D58        0.00265  -0.00004  -0.00017  -0.00111  -0.00128   0.00137
   D59        3.13883   0.00002   0.00023   0.00021   0.00044   3.13927
   D60       -3.13775  -0.00002  -0.00025  -0.00041  -0.00066  -3.13842
   D61       -0.00158   0.00004   0.00014   0.00091   0.00105  -0.00052
   D62       -0.00430   0.00002  -0.00009   0.00100   0.00091  -0.00338
   D63        3.13122   0.00007   0.00029   0.00213   0.00242   3.13364
   D64       -3.14077  -0.00004  -0.00046  -0.00026  -0.00071  -3.14148
   D65       -0.00526   0.00002  -0.00008   0.00088   0.00080  -0.00446
   D66        0.00073  -0.00002  -0.00018  -0.00051  -0.00070   0.00003
   D67        3.13703   0.00003   0.00020   0.00078   0.00098   3.13801
   D68       -0.00218   0.00005   0.00053   0.00054   0.00107  -0.00111
   D69        3.12788   0.00013   0.00013   0.00455   0.00468   3.13256
   D70       -3.13754  -0.00001   0.00014  -0.00061  -0.00047  -3.13802
   D71       -0.00748   0.00007  -0.00026   0.00339   0.00314  -0.00434
   D72        0.76379  -0.00001   0.00014  -0.00173  -0.00159   0.76220
   D73       -2.41640   0.00000   0.00030  -0.00202  -0.00172  -2.41812
   D74        2.87840  -0.00004   0.00007  -0.00189  -0.00181   2.87658
   D75       -0.30179  -0.00003   0.00023  -0.00217  -0.00194  -0.30373
   D76       -1.32872   0.00001   0.00018  -0.00169  -0.00151  -1.33023
   D77        1.77428   0.00001   0.00034  -0.00197  -0.00164   1.77264
   D78        3.10333   0.00000   0.00020  -0.00050  -0.00029   3.10303
   D79       -0.05361   0.00000   0.00015  -0.00044  -0.00029  -0.05390
   D80       -0.00006   0.00000   0.00005  -0.00021  -0.00017  -0.00023
   D81        3.12618   0.00000  -0.00001  -0.00015  -0.00016   3.12603
   D82       -3.09491   0.00000  -0.00018   0.00053   0.00036  -3.09455
   D83        0.04917   0.00001  -0.00008   0.00050   0.00042   0.04959
   D84        0.00871   0.00001  -0.00002   0.00025   0.00023   0.00894
   D85       -3.13041   0.00001   0.00008   0.00022   0.00030  -3.13011
   D86       -0.00758   0.00000  -0.00004   0.00003  -0.00001  -0.00758
   D87        3.13540   0.00000  -0.00005   0.00009   0.00004   3.13544
   D88       -3.13367   0.00000   0.00001  -0.00003  -0.00001  -3.13369
   D89        0.00930   0.00000   0.00001   0.00002   0.00003   0.00933
   D90        0.00659   0.00000   0.00001   0.00011   0.00011   0.00671
   D91       -3.13958   0.00000  -0.00001   0.00001   0.00000  -3.13958
   D92       -3.13639   0.00000   0.00002   0.00005   0.00007  -3.13632
   D93        0.00062   0.00000   0.00000  -0.00004  -0.00004   0.00058
   D94        0.00201   0.00000   0.00002  -0.00007  -0.00005   0.00196
   D95        3.13336  -0.00001  -0.00002  -0.00019  -0.00021   3.13315
   D96       -3.13500   0.00000   0.00004   0.00003   0.00006  -3.13493
   D97       -0.00364   0.00000   0.00000  -0.00010  -0.00010  -0.00374
   D98       -0.00972   0.00000  -0.00001  -0.00012  -0.00013  -0.00985
   D99        3.12939  -0.00001  -0.00011  -0.00008  -0.00019   3.12920
   D100      -3.14112   0.00000   0.00003   0.00001   0.00004  -3.14108
   D101      -0.00201   0.00000  -0.00007   0.00004  -0.00003  -0.00203
         Item               Value     Threshold  Converged?
 Maximum Force            0.024992     0.000450     NO 
 RMS     Force            0.002121     0.000300     NO 
 Maximum Displacement     0.112826     0.001800     NO 
 RMS     Displacement     0.024227     0.001200     NO 
 Predicted change in Energy=-1.024026D-03
 GradGradGradGradGradGradGradGradGradGradGradGradGradGradGradGradGradGrad

                          Input orientation:                          
 ---------------------------------------------------------------------
 Center     Atomic      Atomic             Coordinates (Angstroms)
 Number     Number       Type             X           Y           Z
 ---------------------------------------------------------------------
      1          6           0        0.127774    0.045051   -0.059070
      2          6           0        0.089386    0.046155    1.326793
      3          6           0        1.282841    0.014460    2.065431
      4          6           0        2.513724   -0.017019    1.393263
      5          6           0        2.533248   -0.019838    0.002558
      6          6           0        1.352870    0.011121   -0.752172
      7          8           0        1.137345    0.022605    3.418595
      8          6           0        1.484154    0.005592   -2.244276
      9          6           0        0.262571    0.052325   -3.076376
     10          6           0        0.351421    0.042394   -4.425176
     11          6           0       -0.718491    0.089401   -5.411594
     12          6           0       -0.390096   -0.035773   -6.775043
     13          6           0       -1.363142   -0.011674   -7.767951
     14          6           0       -2.707785    0.146822   -7.415642
     15          6           0       -3.061900    0.281551   -6.065293
     16          6           0       -2.081508    0.253269   -5.086464
     17          8           0       -3.714772    0.182495   -8.332235
     18          6           0        2.308719   -0.040464    4.236771
     19          6           0        1.890900   -0.085478    5.685982
     20          6           0        0.834089   -0.905624    6.100459
     21          6           0        0.484144   -0.976351    7.447698
     22          6           0        1.191242   -0.235868    8.398082
     23          6           0        2.245349    0.582059    7.992109
     24          6           0        2.588425    0.660173    6.641141
     25          1           0       -0.813586    0.069496   -0.596267
     26          1           0       -0.851605    0.072292    1.865838
     27          1           0        3.449352   -0.036882    1.938896
     28          1           0        3.474469   -0.045074   -0.535727
     29          1           0       -0.705962    0.092388   -2.590443
     30          1           0        0.651941   -0.159426   -7.056854
     31          1           0       -1.081919   -0.113693   -8.813772
     32          1           0       -4.108383    0.411085   -5.810541
     33          1           0       -2.379779    0.368120   -4.049023
     34          1           0       -3.343673    0.083181   -9.219142
     35          1           0        2.949460    0.831112    4.049558
     36          1           0        2.884783   -0.939956    3.973338
     37          1           0        0.280900   -1.474709    5.360209
     38          1           0       -0.340917   -1.611304    7.757401
     39          1           0        0.918456   -0.293560    9.447719
     40          1           0        2.795437    1.167231    8.723213
     41          1           0        3.403440    1.308002    6.327733
     42          8           0        2.606802   -0.040528   -2.760075
     43          1           0        1.362309   -0.022273   -4.828747
 ---------------------------------------------------------------------
                    Distance matrix (angstroms):
                    1          2          3          4          5
     1  C    0.000000
     2  C    1.386395   0.000000
     3  C    2.418392   1.403896   0.000000
     4  C    2.793901   2.426071   1.402809   0.000000
     5  C    2.407139   2.780362   2.412496   1.390845   0.000000
     6  C    1.407978   2.433046   2.818475   2.439521   1.401381
     7  O    3.621312   2.339746   1.360989   2.449074   3.690482
     8  C    2.572246   3.834000   4.314415   3.780505   2.479821
     9  C    3.020324   4.406577   5.242190   5.005014   3.826358
    10  C    4.371830   5.757935   6.557156   6.207520   4.936504
    11  C    5.419192   6.786781   7.740597   7.534230   6.316549
    12  C    6.736394   8.116425   8.997511   8.669126   7.381197
    13  C    7.851935   9.210187  10.183187   9.947762   8.692683
    14  C    7.884789   9.179568  10.287534  10.241474   9.084376
    15  C    6.804753   8.039213   9.222623   9.317016   8.259258
    16  C    5.495359   6.773887   7.907305   7.948338   6.875224
    17  O    9.123009  10.382053  11.537583  11.550726  10.418612
    18  C    4.818515   3.660726   2.402116   2.850985   4.240211
    19  C    6.010930   4.718613   3.672617   4.338206   5.719985
    20  C    6.272357   4.924261   4.162858   5.076267   6.391881
    21  C    7.584315   6.218266   5.530680   6.457220   7.780993
    22  C    8.528382   7.162175   6.338258   7.131924   8.504849
    23  C    8.342302   7.025796   6.031095   6.631417   8.017362
    24  C    7.164217   5.904617   4.801939   5.291917   6.673547
    25  H    1.084129   2.124633   3.388609   3.877719   3.401157
    26  H    2.159907   1.084766   2.144537   3.399521   3.864910
    27  H    3.877044   3.416275   2.170811   1.083287   2.142181
    28  H    3.381670   3.864724   3.401882   2.155184   1.084567
    29  H    2.665559   3.997431   5.063454   5.123306   4.150751
    30  H    7.020366   8.405014   9.145729   8.653958   7.307127
    31  H    8.839307  10.209239  11.133982  10.822271   9.529214
    32  H    7.152512   8.288304   9.552672   9.794405   8.836803
    33  H    4.723549   5.924511   7.136274   7.328928   6.379942
    34  H    9.795882  11.090717  12.196349  12.121975  10.935656
    35  H    5.045854   4.026119   2.716855   2.822250   4.156388
    36  H    4.983137   3.973771   2.667815   2.765191   4.091122
    37  H    5.630427   4.314875   3.751942   4.779856   5.991172
    38  H    8.003774   6.654701   6.138259   7.154926   8.422065
    39  H    9.545621   8.170202   7.397691   8.215572   9.586112
    40  H    9.246849   7.955285   6.924081   7.430342   8.804981
    41  H    7.288093   6.130629   4.933296   5.186161   6.521367
    42  O    3.667197   4.800770   5.004139   4.154448   2.763690
    43  H    4.927314   6.286150   6.894733   6.327653   4.971178
                    6          7          8          9         10
     6  C    0.000000
     7  O    4.176348   0.000000
     8  C    1.497879   5.673507   0.000000
     9  C    2.567562   6.553683   1.478796   0.000000
    10  C    3.807208   7.883071   2.457796   1.351760   0.000000
    11  C    5.099694   9.023349   3.858830   2.533200   1.456002
    12  C    6.270176  10.307606   4.903302   3.756843   2.465326
    13  C    7.523191  11.462654   6.214369   4.965674   3.757233
    14  C    7.804432  11.497006   6.658477   5.259389   4.279315
    15  C    6.913218  10.375204   5.944992   4.476414   3.794462
    16  C    5.535312   9.096717   4.566544   3.094437   2.530003
    17  O    9.119634  12.714189   8.007707   6.592439   5.640804
    18  C    5.079947   1.430212   6.533452   7.594567   8.880720
    19  C    6.461318   2.391771   7.941205   8.913437  10.228483
    20  C    6.933116   2.854114   8.419471   9.244381  10.579257
    21  C    8.304676   4.202172   9.792783  10.576549  11.917239
    22  C    9.155013   4.986481  10.649126  11.515583  12.853741
    23  C    8.808232   4.738955  10.280823  11.257148  12.572477
    24  C    7.523891   3.591229   8.977668  10.010454  11.307042
    25  H    2.172842   4.464018   2.828361   2.703580   4.002313
    26  H    3.423073   2.523776   4.727923   5.066287   6.405077
    27  H    3.411655   2.745620   4.621984   5.942767   7.078479
    28  H    2.133352   4.593843   2.623559   4.096422   4.988877
    29  H    2.761274   6.285793   2.219003   1.084340   2.118208
    30  H    6.345818  10.488269   4.886790   4.005079   2.656459
    31  H    8.422183  12.432800   7.053880   5.895161   4.619372
    32  H    7.454687  10.622878   6.645235   5.168134   4.684552
    33  H    4.992929   8.261650   4.280014   2.833334   2.776156
    34  H    9.682577  13.408788   8.483082   7.123168   6.052892
    35  H    5.126217   2.082201   6.514673   7.655378   8.899045
    36  H    5.057840   2.070701   6.443178   7.586770   8.827115
    37  H    6.381067   2.597173   7.840109   8.573688   9.902541
    38  H    8.826891   4.866225  10.294600  10.977367  12.313782
    39  H   10.213683   6.041375  11.709495  12.546026  13.888542
    40  H    9.654041   5.674364  11.106516  12.119766  13.420827
    41  H    7.484102   3.905191   8.880274   9.993950  11.249072
    42  O    2.367845   6.351320   1.236331   2.367295   2.804671
    43  H    4.076722   8.250532   2.587491   2.070215   1.090388
                   11         12         13         14         15
    11  C    0.000000
    12  C    1.408014   0.000000
    13  C    2.445038   1.390419   0.000000
    14  C    2.824322   2.411512   1.399038   0.000000
    15  C    2.440453   2.782620   2.422975   1.402495   0.000000
    16  C    1.410807   2.407429   2.788659   2.414254   1.385668
    17  O    4.185273   3.677765   2.426167   1.362145   2.361160
    18  C   10.112953  11.337710  12.553754  12.687754  11.622382
    19  C   11.401566  12.668171  13.842058  13.887203  12.757641
    20  C   11.658814  12.962785  14.069817  14.012048  12.829405
    21  C   12.959303  14.280593  15.357703  15.243648  14.027034
    22  C   13.944892  15.256617  16.368132  16.291799  15.084633
    23  C   13.736314  15.013196  16.178790  16.190175  15.028898
    24  C   12.511190  13.760447  14.956209  15.030186  13.911254
    25  H    4.816307   6.194166   7.193167   7.077982   5.916935
    26  H    7.278669   8.653871   9.647726   9.465560   8.236020
    27  H    8.450832   9.522294  10.834372  11.200512  10.323025
    28  H    6.432191   7.339211   8.701073   9.251504   8.567783
    29  H    2.821181   4.198460   5.220087   5.224251   4.202476
    30  H    2.155662   1.086531   2.141973   3.392680   3.869143
    31  H    3.427556   2.154323   1.087766   2.160110   3.410378
    32  H    3.428412   3.867247   3.398019   2.146592   1.084806
    33  H    2.166602   3.398993   3.874045   3.389791   2.130288
    34  H    4.624829   3.835543   2.457123   1.913379   3.172619
    35  H   10.174350  11.361167  12.608027  12.803261  11.779163
    36  H   10.105449  11.272536  12.520561  12.734471  11.731549
    37  H   10.930552  12.238672  13.311346  13.220588  12.033323
    38  H   13.283727  14.617682  15.640982  15.456853  14.214553
    39  H   14.954111  16.277493  17.368490  17.254463  16.025840
    40  H   14.604868  15.867916  17.048228  17.081842  15.930874
    41  H   12.501484  13.706910  14.938211  15.085614  14.015752
    42  O    4.254998   5.010128   6.390626   7.067831   6.569808
    43  H    2.163772   2.619002   4.008381   4.825586   4.603801
                   16         17         18         19         20
    16  C    0.000000
    17  O    3.634224   0.000000
    18  C   10.309369  13.939586   0.000000
    19  C   11.486530  15.099860   1.508911   0.000000
    20  C   11.618562  15.171644   2.529105   1.400457   0.000000
    21  C   12.853005  16.370097   3.809857   2.424099   1.393742
    22  C   13.884636  17.439825   4.313171   2.804928   2.419753
    23  C   13.779655  17.382949   3.807114   2.426822   2.789839
    24  C   12.629749  16.253013   2.519945   1.398165   2.412831
    25  H    4.669397   8.262859   5.754923   6.841412   6.965044
    26  H    7.062571  10.592948   3.952428   4.705287   4.661534
    27  H    8.945965  12.524733   2.565402   4.058546   4.991284
    28  H    7.187983  10.607663   4.912812   6.420202   7.193824
    29  H    2.854493   6.482995   7.464369   8.676090   8.882542
    30  H    3.394775   4.561983  11.415123  12.803139  13.179714
    31  H    3.876424   2.692865  13.484007  14.801395  15.057639
    32  H    2.158105   2.562444  11.930280  12.977212  12.962780
    33  H    1.085560   4.490275   9.529078  10.640243  10.722096
    34  H    4.324467   0.966532  14.595425  15.798479  15.909796
    35  H   10.445643  14.076274   1.097835   2.153734   3.420123
    36  H   10.400377  14.008610   1.100151   2.156638   2.954855
    37  H   10.848956  14.359482   2.726027   2.151322   1.085285
    38  H   13.094700  16.537140   4.677921   3.405866   2.150367
    39  H   14.850633  18.379885   5.399155   3.890965   3.403806
    40  H   14.674028  18.282254   4.671572   3.407674   3.875881
    41  H   12.707518  16.335555   2.718252   2.154393   3.399024
    42  O    5.242008   8.429769   7.003193   8.476463   9.077443
    43  H    3.464421   6.171962   9.114803  10.528197  10.977561
                   21         22         23         24         25
    21  C    0.000000
    22  C    1.396972   0.000000
    23  C    2.413891   1.394618   0.000000
    24  C    2.785093   2.416992   1.396037   0.000000
    25  H    8.214820   9.220135   9.131266   8.018893   0.000000
    26  H    5.834470   6.851160   6.883472   5.914637   2.462400
    27  H    6.326291   6.845417   6.202750   4.830961   4.960949
    28  H    8.575802   9.222931   8.638751   7.265664   4.290012
    29  H   10.164784  11.155931  10.997292   9.818223   1.997209
    30  H   14.528508  15.464531  15.151239  13.858455   6.628677
    31  H   16.359466  17.361742  17.146207  15.903603   8.223925
    32  H   14.099546  15.178588  15.195799  14.140497   6.177461
    33  H   11.924104  12.963310  12.900637  11.791859   3.803112
    34  H   17.133544  18.194335  18.102851  16.943178   8.986406
    35  H    4.570783   4.810346   4.012668   2.622187   6.026962
    36  H    4.223218   4.789800   4.344644   3.124966   5.964748
    37  H    2.155755   3.404720   3.875081   3.394581   6.249966
    38  H    1.086189   2.156340   3.399220   3.871264   8.534183
    39  H    2.157525   1.086039   2.155494   3.402248  10.198698
    40  H    3.400582   2.155885   1.086064   2.152902  10.053994
    41  H    3.872322   3.400544   2.153676   1.087270   8.201158
    42  O   10.468050  11.249286  10.776258   9.427310   4.048854
    43  H   12.344737  13.229659  12.865431  11.555406   4.759918
                   26         27         28         29         30
    26  H    0.000000
    27  H    4.302963   0.000000
    28  H    4.949364   2.474764   0.000000
    29  H    4.458705   6.148029   4.660125   0.000000
    30  H    9.051452   9.421467   7.106676   4.675055   0.000000
    31  H   10.683712  11.668684   9.449413   6.238079   2.468830
    32  H    8.345549  10.833920   9.248319   4.695431   4.953732
    33  H    6.116241   8.366479   6.840044   2.237218   4.303101
    34  H   11.361659  13.063744  11.041069   7.134231   4.549646
    35  H    4.448881   2.336280   4.697678   7.615605  11.384734
    36  H    4.407585   2.296352   4.634674   7.552642  11.280955
    37  H    3.985776   4.879736   6.856005   8.163489  12.492041
    38  H    6.148643   7.120389   9.262085  10.493507  14.918307
    39  H    7.794350   7.928036  10.308450  12.153396  16.507270
    40  H    7.843686   6.921304   9.362624  11.891758  15.980148
    41  H    6.288155   4.590502   6.995923   9.894380  13.743044
    42  O    5.776883   4.773912   2.387592   3.319766   4.722068
    43  H    7.051795   7.082157   4.784533   3.049737   2.342626
                   31         32         33         34         35
    31  H    0.000000
    32  H    4.295843   0.000000
    33  H    4.961796   2.468373   0.000000
    34  H    2.306212   3.508684   5.266917   0.000000
    35  H   13.513324  12.133060   9.705780  14.704467   0.000000
    36  H   13.413710  12.101817   9.684263  14.624705   1.773887
    37  H   14.304243  12.149390   9.950320  15.103709   3.762423
    38  H   16.655200  14.225784  12.143588  17.323130   5.526307
    39  H   18.371606  16.080428  13.909645  19.150963   5.876224
    40  H   18.006124  16.107902  13.804038  18.994524   4.688256
    41  H   15.855750  14.302785  11.916630  16.992029   2.371413
    42  O    7.089376   7.389385   5.166659   8.783108   6.873739
    43  H    4.675792   5.574961   3.842343   6.436844   9.059339
                   36         37         38         39         40
    36  H    0.000000
    37  H    2.998263   0.000000
    38  H    5.017468   2.480291   0.000000
    39  H    5.852617   4.302247   2.485888   0.000000
    40  H    5.197070   4.961102   4.299972   2.486338   0.000000
    41  H    3.296285   4.292999   4.958478   4.298193   2.475442
    42  O    6.798904   8.567713  11.035112  12.326589  11.548168
    43  H    8.979797  10.348615  12.799887  14.285940  13.679342
                   41         42         43
    41  H    0.000000
    42  O    9.221791   0.000000
    43  H   11.419408   2.414228   0.000000
 Stoichiometry    C22H18O3
 Framework group  C1[X(C22H18O3)]
 Deg. of freedom   123
 Full point group                 C1      NOp   1
 Largest Abelian subgroup         C1      NOp   1
 Largest concise Abelian subgroup C1      NOp   1
                         Standard orientation:                         
 ---------------------------------------------------------------------
 Center     Atomic      Atomic             Coordinates (Angstroms)
 Number     Number       Type             X           Y           Z
 ---------------------------------------------------------------------
      1          6           0       -0.098877   -0.342828   -0.062540
      2          6           0       -1.430303   -0.727012   -0.104952
      3          6           0       -2.445873    0.239911   -0.037112
      4          6           0       -2.105618    1.596410    0.072487
      5          6           0       -0.764787    1.963481    0.115845
      6          6           0        0.263054    1.013189    0.049824
      7          8           0       -3.718597   -0.239240   -0.090758
      8          6           0        1.673846    1.513545    0.104134
      9          6           0        2.787170    0.543648    0.022591
     10          6           0        4.069896    0.966855    0.075180
     11          6           0        5.294395    0.182238    0.005032
     12          6           0        6.529233    0.834492    0.184590
     13          6           0        7.735284    0.143909    0.142144
     14          6           0        7.735152   -1.235630   -0.090620
     15          6           0        6.519610   -1.908954   -0.280578
     16          6           0        5.325271   -1.207967   -0.233202
     17          8           0        8.876072   -1.977520   -0.148422
     18          6           0       -4.806066    0.684736    0.005083
     19          6           0       -6.104037   -0.084560   -0.011281
     20          6           0       -6.251939   -1.253868    0.745106
     21          6           0       -7.468709   -1.933389    0.760573
     22          6           0       -8.554827   -1.448269    0.028085
     23          6           0       -8.414509   -0.283823   -0.726459
     24          6           0       -7.192286    0.390388   -0.749525
     25          1           0        0.658213   -1.116912   -0.116791
     26          1           0       -1.714760   -1.770231   -0.191525
     27          1           0       -2.869358    2.363087    0.121647
     28          1           0       -0.481109    3.006780    0.201507
     29          1           0        2.561256   -0.512144   -0.077693
     30          1           0        6.537827    1.905730    0.366046
     31          1           0        8.674982    0.672245    0.287274
     32          1           0        6.538412   -2.977396   -0.467348
     33          1           0        4.398170   -1.749996   -0.391723
     34          1           0        9.639417   -1.401965   -0.006209
     35          1           0       -4.772599    1.397685   -0.829078
     36          1           0       -4.710048    1.259380    0.938302
     37          1           0       -5.405236   -1.633668    1.307859
     38          1           0       -7.570661   -2.842514    1.346152
     39          1           0       -9.502820   -1.977962    0.042713
     40          1           0       -9.251332    0.096132   -1.305162
     41          1           0       -7.084022    1.291421   -1.348336
     42          8           0        1.889790    2.725467    0.218708
     43          1           0        4.205069    2.041640    0.199716
 ---------------------------------------------------------------------
 Rotational constants (GHZ):      0.8281846      0.0501411      0.0476383
 Standard basis: 6-31G(d,p) (6D, 7F)
 There are   465 symmetry adapted basis functions of A   symmetry.
 Integral buffers will be    262144 words long.
 Raffenetti 2 integral format.
 Two-electron integral symmetry is turned on.
   465 basis functions,   826 primitive gaussians,   465 cartesian basis functions
    87 alpha electrons       87 beta electrons
       nuclear repulsion energy      1775.5338261973 Hartrees.
 NAtoms=   43 NActive=   43 NUniq=   43 SFac= 7.50D-01 NAtFMM=   80 NAOKFM=F Big=F
 One-electron integrals computed using PRISM.
 NBasis=   465 RedAO= T  NBF=   465
 NBsUse=   465 1.00D-06 NBFU=   465
 Initial guess read from the read-write file.
 B after Tr=     0.000000    0.000000    0.000000
         Rot=    1.000000    0.000000    0.000000    0.000000 Ang=   0.00 deg.
 Initial guess orbital symmetries:
       Occupied  (A) (A) (A) (A) (A) (A) (A) (A) (A) (A) (A) (A)
                 (A) (A) (A) (A) (A) (A) (A) (A) (A) (A) (A) (A)
                 (A) (A) (A) (A) (A) (A) (A) (A) (A) (A) (A) (A)
                 (A) (A) (A) (A) (A) (A) (A) (A) (A) (A) (A) (A)
                 (A) (A) (A) (A) (A) (A) (A) (A) (A) (A) (A) (A)
                 (A) (A) (A) (A) (A) (A) (A) (A) (A) (A) (A) (A)
                 (A) (A) (A) (A) (A) (A) (A) (A) (A) (A) (A) (A)
                 (A) (A) (A)
       Virtual   (A) (A) (A) (A) (A) (A) (A) (A) (A) (A) (A) (A)
                 (A) (A) (A) (A) (A) (A) (A) (A) (A) (A) (A) (A)
                 (A) (A) (A) (A) (A) (A) (A) (A) (A) (A) (A) (A)
                 (A) (A) (A) (A) (A) (A) (A) (A) (A) (A) (A) (A)
                 (A) (A) (A) (A) (A) (A) (A) (A) (A) (A) (A) (A)
                 (A) (A) (A) (A) (A) (A) (A) (A) (A) (A) (A) (A)
                 (A) (A) (A) (A) (A) (A) (A) (A) (A) (A) (A) (A)
                 (A) (A) (A) (A) (A) (A) (A) (A) (A) (A) (A) (A)
                 (A) (A) (A) (A) (A) (A) (A) (A) (A) (A) (A) (A)
                 (A) (A) (A) (A) (A) (A) (A) (A) (A) (A) (A) (A)
                 (A) (A) (A) (A) (A) (A) (A) (A) (A) (A) (A) (A)
                 (A) (A) (A) (A) (A) (A) (A) (A) (A) (A) (A) (A)
                 (A) (A) (A) (A) (A) (A) (A) (A) (A) (A) (A) (A)
                 (A) (A) (A) (A) (A) (A) (A) (A) (A) (A) (A) (A)
                 (A) (A) (A) (A) (A) (A) (A) (A) (A) (A) (A) (A)
                 (A) (A) (A) (A) (A) (A) (A) (A) (A) (A) (A) (A)
                 (A) (A) (A) (A) (A) (A) (A) (A) (A) (A) (A) (A)
                 (A) (A) (A) (A) (A) (A) (A) (A) (A) (A) (A) (A)
                 (A) (A) (A) (A) (A) (A) (A) (A) (A) (A) (A) (A)
                 (A) (A) (A) (A) (A) (A) (A) (A) (A) (A) (A) (A)
                 (A) (A) (A) (A) (A) (A) (A) (A) (A) (A) (A) (A)
                 (A) (A) (A) (A) (A) (A) (A) (A) (A) (A) (A) (A)
                 (A) (A) (A) (A) (A) (A) (A) (A) (A) (A) (A) (A)
                 (A) (A) (A) (A) (A) (A) (A) (A) (A) (A) (A) (A)
                 (A) (A) (A) (A) (A) (A) (A) (A) (A) (A) (A) (A)
                 (A) (A) (A) (A) (A) (A) (A) (A) (A) (A) (A) (A)
                 (A) (A) (A) (A) (A) (A) (A) (A) (A) (A) (A) (A)
                 (A) (A) (A) (A) (A) (A) (A) (A) (A) (A) (A) (A)
                 (A) (A) (A) (A) (A) (A) (A) (A) (A) (A) (A) (A)
                 (A) (A) (A) (A) (A) (A) (A) (A) (A) (A) (A) (A)
                 (A) (A) (A) (A) (A) (A) (A) (A) (A) (A) (A) (A)
                 (A) (A) (A) (A) (A) (A)
 Harris functional with IExCor=  402 diagonalized for initial guess.
 ExpMin= 1.61D-01 ExpMax= 5.48D+03 ExpMxC= 8.25D+02 IAcc=1 IRadAn=         1 AccDes= 0.00D+00
 HarFok:  IExCor=  402 AccDes= 0.00D+00 IRadAn=         1 IDoV= 1
 ScaDFX=  1.000000  1.000000  1.000000  1.000000
 FoFCou: FMM=F IPFlag=           0 FMFlag=      100000 FMFlg1=           0
         NFxFlg=           0 DoJE=T BraDBF=F KetDBF=T FulRan=T
         Omega=  0.000000  0.000000  1.000000  0.000000  0.000000 ICntrl=     500 IOpCl=  0
         NMat0=    1 NMatS0=    1 NMatT0=    0 NMatD0=    1 NMtDS0=    0 NMtDT0=    0
         I1Cent=           4 NGrid=           0.
 Petite list used in FoFCou.
 Requested convergence on RMS density matrix=1.00D-08 within 128 cycles.
 Requested convergence on MAX density matrix=1.00D-06.
 Requested convergence on             energy=1.00D-06.
 No special actions if energy rises.
 Integral accuracy reduced to 1.0D-05 until final iterations.
 Initial convergence to 1.0D-05 achieved.  Increase integral accuracy.
 SCF Done:  E(RB3LYP) =  -1074.86439375     A.U. after   12 cycles
             Convg  =    0.4592D-08             -V/T =  2.0095
 Calling FoFJK, ICntrl=      2127 FMM=F ISym2X=0 I1Cent= 0 IOpClX= 0 NMat=1 NMatS=1 NMatT=0.
 ***** Axes restored to original set *****
 -------------------------------------------------------------------
 Center     Atomic                   Forces (Hartrees/Bohr)
 Number     Number              X              Y              Z
 -------------------------------------------------------------------
      1        6           0.000285356   -0.000012542   -0.000185422
      2        6           0.000357761   -0.000031559    0.000299927
      3        6          -0.000235543   -0.000008672    0.000040917
      4        6           0.000283500   -0.000027745   -0.000024080
      5        6           0.000221705    0.000067929    0.000279050
      6        6          -0.000747492    0.000149075   -0.000838253
      7        8           0.000012830    0.000014191    0.000002769
      8        6           0.005370454   -0.000894185   -0.000772520
      9        6          -0.002868947    0.000590338   -0.003416434
     10        6           0.003218502   -0.000896323    0.001616748
     11        6          -0.000718898   -0.000109013   -0.001023516
     12        6           0.000464074   -0.000064021    0.000582345
     13        6          -0.000319565    0.000125550    0.000134105
     14        6           0.000188694    0.000019037   -0.000059106
     15        6          -0.000181837    0.000138624    0.000410077
     16        6          -0.000773487    0.000024027    0.000305324
     17        8           0.000043953   -0.000018520    0.000039925
     18        6          -0.000029977   -0.000004930   -0.000041392
     19        6          -0.000047252   -0.000023745    0.000009815
     20        6           0.000001065    0.000000589   -0.000014840
     21        6           0.000006958   -0.000000148    0.000009058
     22        6          -0.000003887   -0.000003509    0.000001873
     23        6          -0.000005925   -0.000002408    0.000002307
     24        6           0.000023554   -0.000012181   -0.000008049
     25        1          -0.000010006   -0.000013660    0.000193092
     26        1          -0.000026314   -0.000007553    0.000019799
     27        1          -0.000051542    0.000007846    0.000104460
     28        1           0.000047265    0.000002274    0.000061768
     29        1           0.000325350    0.000329519    0.000032682
     30        1          -0.000003378    0.000025934    0.000075081
     31        1           0.000094648    0.000002125    0.000031643
     32        1           0.000003138   -0.000041080   -0.000053044
     33        1           0.000324678   -0.000152077    0.000056005
     34        1           0.000024304   -0.000013924   -0.000029256
     35        1          -0.000012984    0.000022160   -0.000010891
     36        1           0.000009802    0.000001823   -0.000013448
     37        1           0.000008137    0.000005302    0.000000075
     38        1           0.000002602   -0.000004739   -0.000003533
     39        1           0.000001379   -0.000005057    0.000000473
     40        1          -0.000004598    0.000000273    0.000002248
     41        1          -0.000007067    0.000008039    0.000004830
     42        8          -0.004928823    0.000369513    0.001485927
     43        1          -0.000342189    0.000443422    0.000691460
 -------------------------------------------------------------------
 Cartesian Forces:  Max     0.005370454 RMS     0.000868249

 GradGradGradGradGradGradGradGradGradGradGradGradGradGradGradGradGradGrad
 Berny optimization.
 Using GEDIIS/GDIIS optimizer.
 Internal  Forces:  Max     0.005109397 RMS     0.000517174
 Search for a local minimum.
 Step number   4 out of a maximum of  227
 All quantities printed in internal units (Hartrees-Bohrs-Radians)
 Mixed Optimization -- En-DIIS/RFO-DIIS
 Update second derivatives using D2CorX and points    1    2    3    4
 DE= -9.12D-04 DEPred=-1.02D-03 R= 8.90D-01
 SS=  1.41D+00  RLast= 1.09D-01 DXNew= 1.1436D+00 3.2648D-01
 Trust test= 8.90D-01 RLast= 1.09D-01 DXMaxT set to 6.80D-01
 Use linear search instead of GDIIS.
     Eigenvalues ---    0.00649   0.00782   0.00909   0.01075   0.01294
     Eigenvalues ---    0.01332   0.01516   0.01639   0.01778   0.01869
     Eigenvalues ---    0.01988   0.02037   0.02058   0.02059   0.02089
     Eigenvalues ---    0.02089   0.02095   0.02103   0.02104   0.02119
     Eigenvalues ---    0.02121   0.02125   0.02129   0.02132   0.02139
     Eigenvalues ---    0.02143   0.02143   0.02147   0.02148   0.02151
     Eigenvalues ---    0.02152   0.02156   0.02174   0.02184   0.02194
     Eigenvalues ---    0.02203   0.02210   0.02755   0.06388   0.07338
     Eigenvalues ---    0.11387   0.13891   0.14721   0.15998   0.15999
     Eigenvalues ---    0.16000   0.16000   0.16000   0.16000   0.16000
     Eigenvalues ---    0.16000   0.16000   0.16000   0.16000   0.16000
     Eigenvalues ---    0.16004   0.16025   0.16107   0.20065   0.22000
     Eigenvalues ---    0.22000   0.22002   0.22018   0.22036   0.22707
     Eigenvalues ---    0.22961   0.22989   0.23471   0.23896   0.24064
     Eigenvalues ---    0.24116   0.24981   0.25000   0.25000   0.25000
     Eigenvalues ---    0.25003   0.25212   0.29620   0.31466   0.32806
     Eigenvalues ---    0.33648   0.33907   0.35018   0.35131   0.35200
     Eigenvalues ---    0.35261   0.35274   0.35277   0.35338   0.35363
     Eigenvalues ---    0.35407   0.35435   0.35450   0.35469   0.35552
     Eigenvalues ---    0.35623   0.36373   0.37282   0.40467   0.40980
     Eigenvalues ---    0.41125   0.41497   0.41766   0.41956   0.41976
     Eigenvalues ---    0.42293   0.44656   0.44803   0.45039   0.45433
     Eigenvalues ---    0.45836   0.46007   0.46031   0.46356   0.46472
     Eigenvalues ---    0.46551   0.47571   0.48040   0.52529   0.52786
     Eigenvalues ---    0.54077   0.57458   0.967791000.000001000.00000
     Eigenvalues --- 1000.000001000.000001000.000001000.000001000.00000
     Eigenvalues --- 1000.000001000.000001000.000001000.000001000.00000
     Eigenvalues --- 1000.000001000.000001000.000001000.000001000.00000
     Eigenvalues --- 1000.000001000.000001000.000001000.000001000.00000
     Eigenvalues --- 1000.000001000.000001000.000001000.000001000.00000
     Eigenvalues --- 1000.000001000.000001000.000001000.000001000.00000
     Eigenvalues --- 1000.000001000.000001000.000001000.000001000.00000
     Eigenvalues --- 1000.000001000.000001000.000001000.000001000.00000
     Eigenvalues --- 1000.000001000.000001000.000001000.000001000.00000
     Eigenvalues --- 1000.000001000.000001000.000001000.000001000.00000
     Eigenvalues --- 1000.000001000.000001000.000001000.000001000.00000
     Eigenvalues --- 1000.000001000.000001000.000001000.000001000.00000
     Eigenvalues --- 1000.000001000.000001000.000001000.000001000.00000
     Eigenvalues --- 1000.000001000.000001000.000001000.000001000.00000
     Eigenvalues --- 1000.000001000.000001000.000001000.000001000.00000
     Eigenvalues --- 1000.000001000.000001000.000001000.000001000.00000
     Eigenvalues --- 1000.000001000.000001000.000001000.000001000.00000
     Eigenvalues --- 1000.000001000.000001000.000001000.000001000.00000
     Eigenvalues --- 1000.000001000.00000
 RFO step:  Lambda=-1.60774289D-04 EMin= 6.48764692D-03
 Quartic linear search produced a step of -0.07752.
 Iteration  1 RMS(Cart)=  0.02462152 RMS(Int)=  0.00021614
 Iteration  2 RMS(Cart)=  0.00041362 RMS(Int)=  0.00001319
 Iteration  3 RMS(Cart)=  0.00000008 RMS(Int)=  0.00001319
 Variable       Old X    -DE/DX   Delta X   Delta X   Delta X     New X
                                 (Linear)    (Quad)   (Total)
    R1        2.61991   0.00030  -0.00006   0.00074   0.00067   2.62058
    R2        2.66069  -0.00011   0.00031  -0.00101  -0.00070   2.65999
    R3        2.04871  -0.00009  -0.00003  -0.00012  -0.00015   2.04856
    R4        2.65298  -0.00027  -0.00002  -0.00059  -0.00060   2.65238
    R5        2.04991   0.00003   0.00001   0.00006   0.00007   2.04998
    R6        2.65093  -0.00003  -0.00005   0.00009   0.00003   2.65096
    R7        2.57190  -0.00006   0.00003  -0.00016  -0.00013   2.57177
    R8        2.62832   0.00007   0.00005   0.00003   0.00008   2.62840
    R9        2.04712   0.00001   0.00000   0.00001   0.00001   2.04713
   R10        2.64823   0.00067  -0.00009   0.00160   0.00151   2.64974
   R11        2.04953   0.00001  -0.00005   0.00011   0.00006   2.04960
   R12        2.83058  -0.00012   0.00000   0.00004   0.00004   2.83062
   R13        2.70271  -0.00008  -0.00001  -0.00014  -0.00015   2.70256
   R14        2.79452   0.00079  -0.00250   0.00875   0.00625   2.80077
   R15        2.33633  -0.00511   0.00067  -0.00640  -0.00573   2.33060
   R16        2.55446  -0.00264  -0.00331  -0.00008  -0.00338   2.55107
   R17        2.04911  -0.00026  -0.00022  -0.00008  -0.00031   2.04880
   R18        2.75145   0.00031  -0.00008   0.00068   0.00060   2.75205
   R19        2.06053  -0.00060  -0.00029  -0.00072  -0.00101   2.05952
   R20        2.66076  -0.00087   0.00022  -0.00230  -0.00208   2.65868
   R21        2.66604   0.00041  -0.00009   0.00111   0.00102   2.66706
   R22        2.62751   0.00003  -0.00008   0.00022   0.00014   2.62765
   R23        2.05325  -0.00003  -0.00003   0.00003  -0.00001   2.05324
   R24        2.64380   0.00010   0.00002   0.00017   0.00018   2.64398
   R25        2.05558  -0.00001   0.00001  -0.00004  -0.00003   2.05555
   R26        2.65033   0.00023  -0.00005   0.00066   0.00061   2.65094
   R27        2.57408  -0.00006  -0.00004  -0.00001  -0.00005   2.57403
   R28        2.61853  -0.00026   0.00005  -0.00062  -0.00057   2.61796
   R29        2.04999  -0.00002  -0.00001  -0.00002  -0.00004   2.04995
   R30        2.05141  -0.00005  -0.00008   0.00003  -0.00005   2.05136
   R31        1.82648   0.00004   0.00000   0.00007   0.00006   1.82655
   R32        2.85143   0.00001   0.00001   0.00001   0.00002   2.85145
   R33        2.07461   0.00001   0.00000   0.00002   0.00002   2.07463
   R34        2.07898   0.00001   0.00001   0.00001   0.00001   2.07900
   R35        2.64648  -0.00002   0.00000  -0.00004  -0.00004   2.64644
   R36        2.64215   0.00001   0.00000   0.00001   0.00001   2.64216
   R37        2.63379   0.00001   0.00000   0.00002   0.00002   2.63381
   R38        2.05089  -0.00001   0.00000  -0.00002  -0.00002   2.05087
   R39        2.63989   0.00000   0.00000   0.00000   0.00000   2.63990
   R40        2.05260   0.00000   0.00000  -0.00001  -0.00001   2.05259
   R41        2.63545   0.00000   0.00000  -0.00001  -0.00001   2.63544
   R42        2.05232   0.00000   0.00000   0.00000   0.00000   2.05231
   R43        2.63813   0.00000   0.00000   0.00000   0.00000   2.63813
   R44        2.05236   0.00000   0.00000   0.00000   0.00000   2.05237
   R45        2.05464   0.00000   0.00000   0.00000   0.00000   2.05465
    A1        2.11319   0.00004   0.00029  -0.00052  -0.00024   2.11296
    A2        2.06151  -0.00020   0.00000  -0.00105  -0.00105   2.06046
    A3        2.10848   0.00016  -0.00029   0.00158   0.00129   2.10977
    A4        2.09714   0.00023  -0.00013   0.00106   0.00093   2.09807
    A5        2.11855  -0.00011   0.00014  -0.00067  -0.00054   2.11801
    A6        2.06749  -0.00012  -0.00001  -0.00038  -0.00040   2.06710
    A7        2.08785  -0.00003  -0.00006  -0.00013  -0.00019   2.08766
    A8        2.01761   0.00000   0.00005  -0.00004   0.00001   2.01762
    A9        2.17772   0.00003   0.00001   0.00017   0.00018   2.17790
   A10        2.08458  -0.00010   0.00014  -0.00076  -0.00062   2.08396
   A11        2.11403  -0.00007  -0.00002  -0.00041  -0.00043   2.11360
   A12        2.08457   0.00017  -0.00012   0.00117   0.00105   2.08562
   A13        2.12544   0.00024   0.00006   0.00088   0.00094   2.12638
   A14        2.10423  -0.00020  -0.00026  -0.00028  -0.00053   2.10370
   A15        2.05352  -0.00004   0.00019  -0.00060  -0.00041   2.05311
   A16        2.05817  -0.00038  -0.00031  -0.00052  -0.00083   2.05734
   A17        2.17332   0.00086  -0.00014   0.00330   0.00316   2.17647
   A18        2.05170  -0.00048   0.00045  -0.00278  -0.00233   2.04937
   A19        2.07254  -0.00009  -0.00012  -0.00003  -0.00015   2.07239
   A20        2.08059   0.00160   0.00111   0.00205   0.00315   2.08375
   A21        2.08900   0.00003   0.00049  -0.00130  -0.00081   2.08819
   A22        2.11359  -0.00163  -0.00161  -0.00074  -0.00235   2.11124
   A23        2.10241  -0.00191  -0.00045  -0.00640  -0.00684   2.09557
   A24        2.07928   0.00078   0.00120   0.00016   0.00136   2.08064
   A25        2.10150   0.00113  -0.00076   0.00624   0.00548   2.10698
   A26        2.24909  -0.00209  -0.00112  -0.00564  -0.00688   2.24221
   A27        2.01604   0.00053   0.00030   0.00048   0.00068   2.01672
   A28        2.01797   0.00157   0.00083   0.00549   0.00621   2.02418
   A29        2.07349   0.00027  -0.00050   0.00217   0.00167   2.07516
   A30        2.16223  -0.00087   0.00050  -0.00436  -0.00386   2.15838
   A31        2.04746   0.00061   0.00000   0.00219   0.00219   2.04965
   A32        2.12556  -0.00046   0.00005  -0.00211  -0.00206   2.12350
   A33        2.07711   0.00016  -0.00022   0.00119   0.00096   2.07807
   A34        2.08050   0.00030   0.00017   0.00094   0.00111   2.08161
   A35        2.08834   0.00016  -0.00007   0.00085   0.00078   2.08912
   A36        2.09904  -0.00018   0.00011  -0.00119  -0.00108   2.09796
   A37        2.09580   0.00002  -0.00005   0.00035   0.00030   2.09610
   A38        2.08980   0.00019   0.00000   0.00087   0.00087   2.09067
   A39        2.14604  -0.00015  -0.00004  -0.00058  -0.00061   2.14542
   A40        2.04734  -0.00004   0.00003  -0.00029  -0.00026   2.04709
   A41        2.09385  -0.00039   0.00012  -0.00166  -0.00155   2.09230
   A42        2.07276   0.00014  -0.00002   0.00044   0.00042   2.07318
   A43        2.11657   0.00025  -0.00010   0.00123   0.00113   2.11770
   A44        2.12132  -0.00011  -0.00010  -0.00011  -0.00021   2.12111
   A45        2.09207  -0.00029   0.00037  -0.00273  -0.00236   2.08971
   A46        2.06977   0.00040  -0.00027   0.00285   0.00258   2.07235
   A47        1.90809  -0.00002   0.00000  -0.00010  -0.00010   1.90799
   A48        1.90071   0.00001   0.00003  -0.00007  -0.00004   1.90067
   A49        1.92352  -0.00001   0.00000  -0.00010  -0.00010   1.92342
   A50        1.90491  -0.00001  -0.00001  -0.00005  -0.00006   1.90485
   A51        1.92738   0.00001  -0.00001   0.00007   0.00006   1.92744
   A52        1.92898   0.00001   0.00001   0.00007   0.00008   1.92907
   A53        1.87828   0.00000  -0.00002   0.00008   0.00006   1.87834
   A54        2.10677   0.00002  -0.00001   0.00008   0.00008   2.10684
   A55        2.09679  -0.00002   0.00001  -0.00010  -0.00010   2.09669
   A56        2.07899   0.00001   0.00000   0.00002   0.00002   2.07902
   A57        2.10049   0.00000   0.00000  -0.00002  -0.00002   2.10048
   A58        2.08272   0.00000   0.00000  -0.00003  -0.00003   2.08269
   A59        2.09987   0.00001   0.00000   0.00005   0.00005   2.09991
   A60        2.09859   0.00000   0.00000   0.00001   0.00001   2.09861
   A61        2.08978   0.00000   0.00000  -0.00002  -0.00002   2.08976
   A62        2.09481   0.00000   0.00000   0.00001   0.00000   2.09481
   A63        2.08911   0.00000   0.00000  -0.00001  -0.00001   2.08910
   A64        2.09696   0.00000   0.00000   0.00002   0.00002   2.09698
   A65        2.09711   0.00000   0.00000  -0.00001  -0.00001   2.09710
   A66        2.09470   0.00000   0.00000   0.00001   0.00001   2.09471
   A67        2.09771   0.00000   0.00000  -0.00001  -0.00001   2.09771
   A68        2.09072   0.00000   0.00000  -0.00001   0.00000   2.09072
   A69        2.10442   0.00000   0.00001  -0.00002  -0.00001   2.10440
   A70        2.08841   0.00001  -0.00001   0.00005   0.00004   2.08845
   A71        2.09036   0.00000   0.00000  -0.00003  -0.00003   2.09033
    D1        0.00108   0.00001   0.00002   0.00022   0.00024   0.00132
    D2        3.14151   0.00001   0.00001   0.00024   0.00025  -3.14142
    D3        3.14101  -0.00001   0.00002  -0.00043  -0.00041   3.14060
    D4       -0.00175  -0.00001   0.00002  -0.00042  -0.00040  -0.00215
    D5       -0.00136  -0.00001  -0.00004  -0.00024  -0.00029  -0.00165
    D6        3.14009  -0.00002  -0.00003  -0.00079  -0.00083   3.13927
    D7       -3.14124   0.00001  -0.00005   0.00043   0.00038  -3.14086
    D8        0.00021   0.00000  -0.00004  -0.00012  -0.00016   0.00005
    D9        0.00106   0.00000  -0.00001  -0.00015  -0.00016   0.00090
   D10        3.13818  -0.00001   0.00000  -0.00027  -0.00027   3.13791
   D11       -3.13940   0.00000   0.00000  -0.00016  -0.00017  -3.13957
   D12       -0.00228  -0.00001   0.00000  -0.00029  -0.00028  -0.00256
   D13       -0.00288   0.00000   0.00003   0.00011   0.00013  -0.00274
   D14        3.13625   0.00000   0.00005  -0.00007  -0.00002   3.13623
   D15       -3.13955   0.00001   0.00002   0.00024   0.00026  -3.13929
   D16       -0.00043   0.00000   0.00004   0.00006   0.00010  -0.00032
   D17        3.11589   0.00000   0.00000  -0.00006  -0.00006   3.11583
   D18       -0.03044   0.00000   0.00001  -0.00019  -0.00018  -0.03062
   D19        0.00262  -0.00001  -0.00006  -0.00013  -0.00019   0.00243
   D20       -3.14039   0.00001  -0.00001   0.00024   0.00023  -3.14016
   D21       -3.13655   0.00000  -0.00008   0.00004  -0.00004  -3.13658
   D22        0.00363   0.00001  -0.00004   0.00042   0.00038   0.00401
   D23       -0.00051   0.00001   0.00006   0.00020   0.00026  -0.00024
   D24        3.14121   0.00002   0.00005   0.00071   0.00076  -3.14121
   D25       -3.14072   0.00000   0.00002  -0.00017  -0.00015  -3.14087
   D26        0.00100   0.00001   0.00001   0.00034   0.00035   0.00135
   D27        0.01157   0.00014   0.00001   0.00729   0.00730   0.01887
   D28       -3.12746  -0.00003  -0.00036   0.00049   0.00013  -3.12732
   D29       -3.13016   0.00013   0.00002   0.00674   0.00677  -3.12339
   D30        0.01400  -0.00004  -0.00035  -0.00005  -0.00040   0.01360
   D31       -3.09409   0.00000  -0.00007   0.00042   0.00035  -3.09374
   D32        1.07235   0.00000  -0.00008   0.00044   0.00036   1.07270
   D33       -0.98681   0.00001  -0.00005   0.00044   0.00038  -0.98643
   D34       -3.13638  -0.00005  -0.00002  -0.00271  -0.00273  -3.13911
   D35        0.00279  -0.00004  -0.00065  -0.00087  -0.00152   0.00127
   D36        0.00261   0.00012   0.00035   0.00419   0.00454   0.00714
   D37       -3.14141   0.00013  -0.00028   0.00603   0.00575  -3.13566
   D38       -3.13519  -0.00010  -0.00216  -0.00128  -0.00346  -3.13865
   D39        0.02125  -0.00040  -0.00302  -0.02937  -0.03237  -0.01112
   D40        0.00886  -0.00011  -0.00154  -0.00313  -0.00469   0.00418
   D41       -3.11788  -0.00041  -0.00240  -0.03122  -0.03360   3.13170
   D42       -3.05752  -0.00034   0.00144  -0.03779  -0.03637  -3.09389
   D43        0.08310  -0.00030   0.00199  -0.03635  -0.03438   0.04872
   D44        0.06921  -0.00005   0.00230  -0.00971  -0.00739   0.06182
   D45       -3.07336   0.00000   0.00285  -0.00826  -0.00540  -3.07876
   D46        3.13128   0.00010   0.00034   0.00432   0.00467   3.13594
   D47       -0.00492   0.00004   0.00030   0.00153   0.00183  -0.00310
   D48       -0.00940   0.00006  -0.00017   0.00298   0.00280  -0.00660
   D49        3.13758   0.00000  -0.00021   0.00018  -0.00004   3.13754
   D50       -3.13330  -0.00009  -0.00034  -0.00382  -0.00416  -3.13747
   D51        0.01631  -0.00011  -0.00006  -0.00524  -0.00530   0.01101
   D52        0.00733  -0.00005   0.00020  -0.00240  -0.00220   0.00513
   D53       -3.12624  -0.00007   0.00049  -0.00382  -0.00333  -3.12958
   D54        0.00521  -0.00004   0.00002  -0.00170  -0.00168   0.00353
   D55       -3.13819  -0.00003   0.00007  -0.00157  -0.00149  -3.13969
   D56        3.14140   0.00003   0.00007   0.00110   0.00117  -3.14062
   D57       -0.00200   0.00003   0.00011   0.00123   0.00135  -0.00065
   D58        0.00137   0.00000   0.00010  -0.00025  -0.00015   0.00123
   D59        3.13927   0.00002  -0.00003   0.00110   0.00107   3.14034
   D60       -3.13842  -0.00001   0.00005  -0.00038  -0.00033  -3.13874
   D61       -0.00052   0.00002  -0.00008   0.00097   0.00089   0.00037
   D62       -0.00338   0.00002  -0.00007   0.00080   0.00073  -0.00266
   D63        3.13364   0.00004  -0.00019   0.00195   0.00176   3.13540
   D64       -3.14148  -0.00001   0.00006  -0.00048  -0.00042   3.14128
   D65       -0.00446   0.00001  -0.00006   0.00067   0.00061  -0.00385
   D66        0.00003  -0.00001   0.00005  -0.00038  -0.00033  -0.00030
   D67        3.13801   0.00002  -0.00008   0.00094   0.00086   3.13887
   D68       -0.00111   0.00001  -0.00008   0.00058   0.00050  -0.00061
   D69        3.13256   0.00003  -0.00036   0.00196   0.00160   3.13416
   D70       -3.13802  -0.00001   0.00004  -0.00060  -0.00056  -3.13858
   D71       -0.00434   0.00001  -0.00024   0.00078   0.00054  -0.00380
   D72        0.76220  -0.00001   0.00012  -0.00151  -0.00139   0.76081
   D73       -2.41812  -0.00001   0.00013  -0.00153  -0.00140  -2.41952
   D74        2.87658  -0.00002   0.00014  -0.00164  -0.00150   2.87508
   D75       -0.30373  -0.00002   0.00015  -0.00166  -0.00151  -0.30524
   D76       -1.33023   0.00000   0.00012  -0.00145  -0.00134  -1.33157
   D77        1.77264  -0.00001   0.00013  -0.00148  -0.00135   1.77129
   D78        3.10303   0.00000   0.00002   0.00002   0.00004   3.10308
   D79       -0.05390   0.00000   0.00002  -0.00012  -0.00010  -0.05399
   D80       -0.00023   0.00000   0.00001   0.00005   0.00006  -0.00017
   D81        3.12603   0.00000   0.00001  -0.00009  -0.00008   3.12594
   D82       -3.09455   0.00000  -0.00003  -0.00001  -0.00004  -3.09459
   D83        0.04959   0.00000  -0.00003   0.00018   0.00015   0.04974
   D84        0.00894   0.00000  -0.00002  -0.00003  -0.00005   0.00889
   D85       -3.13011   0.00000  -0.00002   0.00016   0.00014  -3.12997
   D86       -0.00758   0.00000   0.00000  -0.00004  -0.00004  -0.00763
   D87        3.13544   0.00000   0.00000  -0.00010  -0.00010   3.13534
   D88       -3.13369   0.00000   0.00000   0.00010   0.00010  -3.13359
   D89        0.00933   0.00000   0.00000   0.00005   0.00004   0.00938
   D90        0.00671   0.00000  -0.00001   0.00002   0.00002   0.00672
   D91       -3.13958   0.00000   0.00000  -0.00001  -0.00001  -3.13959
   D92       -3.13632   0.00000  -0.00001   0.00008   0.00007  -3.13625
   D93        0.00058   0.00000   0.00000   0.00005   0.00005   0.00063
   D94        0.00196   0.00000   0.00000  -0.00001  -0.00001   0.00195
   D95        3.13315   0.00000   0.00002  -0.00008  -0.00007   3.13308
   D96       -3.13493   0.00000  -0.00001   0.00002   0.00002  -3.13492
   D97       -0.00374   0.00000   0.00001  -0.00005  -0.00004  -0.00379
   D98       -0.00985   0.00000   0.00001   0.00002   0.00002  -0.00982
   D99        3.12920   0.00000   0.00001  -0.00018  -0.00016   3.12903
   D100      -3.14108   0.00000   0.00000   0.00009   0.00009  -3.14099
   D101      -0.00203   0.00000   0.00000  -0.00011  -0.00010  -0.00214
         Item               Value     Threshold  Converged?
 Maximum Force            0.005109     0.000450     NO 
 RMS     Force            0.000517     0.000300     NO 
 Maximum Displacement     0.149140     0.001800     NO 
 RMS     Displacement     0.024555     0.001200     NO 
 Predicted change in Energy=-8.696045D-05
 GradGradGradGradGradGradGradGradGradGradGradGradGradGradGradGradGradGrad

                          Input orientation:                          
 ---------------------------------------------------------------------
 Center     Atomic      Atomic             Coordinates (Angstroms)
 Number     Number       Type             X           Y           Z
 ---------------------------------------------------------------------
      1          6           0        0.116501    0.036225   -0.053864
      2          6           0        0.082657    0.041921    1.332463
      3          6           0        1.277473    0.009071    2.068237
      4          6           0        2.506553   -0.028469    1.393052
      5          6           0        2.521673   -0.035872    0.002264
      6          6           0        1.339044   -0.003893   -0.750381
      7          8           0        1.135216    0.022390    3.421635
      8          6           0        1.470446   -0.015823   -2.242459
      9          6           0        0.249402    0.040380   -3.080622
     10          6           0        0.351797    0.027502   -4.426640
     11          6           0       -0.714816    0.078472   -5.416899
     12          6           0       -0.380704   -0.005590   -6.780976
     13          6           0       -1.353075    0.030479   -7.774286
     14          6           0       -2.700814    0.157499   -7.420674
     15          6           0       -3.060720    0.248933   -6.067897
     16          6           0       -2.081230    0.209903   -5.088964
     17          8           0       -3.706148    0.201084   -8.338701
     18          6           0        2.308371   -0.041572    4.237043
     19          6           0        1.893985   -0.080714    5.687420
     20          6           0        0.834709   -0.895067    6.106926
     21          6           0        0.487889   -0.960374    7.455255
     22          6           0        1.200618   -0.220256    8.401709
     23          6           0        2.257232    0.591895    7.990701
     24          6           0        2.597208    0.664626    6.638646
     25          1           0       -0.827044    0.061380   -0.587019
     26          1           0       -0.856802    0.072615    1.874013
     27          1           0        3.443273   -0.049333    1.936782
     28          1           0        3.461415   -0.066035   -0.538412
     29          1           0       -0.720845    0.090503   -2.599428
     30          1           0        0.663872   -0.103490   -7.063499
     31          1           0       -1.068099   -0.038146   -8.821797
     32          1           0       -4.109854    0.352822   -5.812378
     33          1           0       -2.379919    0.289198   -4.048349
     34          1           0       -3.331322    0.131832   -9.226936
     35          1           0        2.951170    0.827534    4.045384
     36          1           0        2.881064   -0.943622    3.974976
     37          1           0        0.277136   -1.463764    5.369692
     38          1           0       -0.339177   -1.590780    7.768859
     39          1           0        0.930256   -0.273717    9.452197
     40          1           0        2.811683    1.176810    8.718709
     41          1           0        3.414140    1.308120    6.321317
     42          8           0        2.590665   -0.067212   -2.755782
     43          1           0        1.367153   -0.014574   -4.820418
 ---------------------------------------------------------------------
                    Distance matrix (angstroms):
                    1          2          3          4          5
     1  C    0.000000
     2  C    1.386752   0.000000
     3  C    2.419071   1.403577   0.000000
     4  C    2.794655   2.425674   1.402826   0.000000
     5  C    2.406906   2.779259   2.412115   1.390889   0.000000
     6  C    1.407607   2.432869   2.819320   2.440898   1.402180
     7  O    3.621749   2.339423   1.360920   2.449143   3.690225
     8  C    2.574067   3.835279   4.315085   3.780293   2.478762
     9  C    3.029677   4.416234   5.250586   5.011310   3.830564
    10  C    4.379111   5.765407   6.560537   6.206039   4.932299
    11  C    5.427248   6.796410   7.746050   7.534194   6.313103
    12  C    6.745592   8.126799   9.003241   8.668997   7.378148
    13  C    7.859046   9.219237  10.188007   9.946873   8.688660
    14  C    7.888084   9.185776  10.290201  10.238800   9.078093
    15  C    6.805041   8.042948   9.223564   9.313283   8.251733
    16  C    5.496583   6.778300   7.908650   7.944879   6.867876
    17  O    9.125698  10.388060  11.540265  11.548046  10.412185
    18  C    4.818944   3.660240   2.401881   2.850918   4.240151
    19  C    6.011278   4.718219   3.672415   4.338152   5.719877
    20  C    6.272037   4.923314   4.162272   5.076087   6.391475
    21  C    7.584063   6.217507   5.530211   6.457071   7.780621
    22  C    8.528646   7.161900   6.338089   7.131867   8.504696
    23  C    8.343052   7.025907   6.031185   6.631439   8.017427
    24  C    7.165088   5.904770   4.802093   5.291962   6.673677
    25  H    1.084051   2.124229   3.388527   3.878353   3.401562
    26  H    2.159943   1.084804   2.144036   3.399073   3.863846
    27  H    3.877809   3.415739   2.170572   1.083293   2.142869
    28  H    3.381374   3.863656   3.401450   2.154931   1.084599
    29  H    2.680297   4.013446   5.078091   5.135187   4.159171
    30  H    7.032362   8.417312   9.153020   8.655308   7.306231
    31  H    8.847907  10.219572  11.139874  10.822263   9.526307
    32  H    7.150021   8.289907   9.552254   9.789813   8.828267
    33  H    4.717205   5.922716   7.132153   7.320339   6.367005
    34  H    9.800096  11.097939  12.199877  12.119844  10.929950
    35  H    5.046320   4.025604   2.716662   2.822284   4.156531
    36  H    4.983418   3.973066   2.667355   2.764796   4.090918
    37  H    5.629452   4.313250   3.750937   4.779544   5.990501
    38  H    8.003111   6.653635   6.137604   7.154713   8.421532
    39  H    9.545861   8.169953   7.397527   8.215515   9.585949
    40  H    9.247863   7.955638   6.924319   7.430414   8.805175
    41  H    7.289381   6.131126   4.933717   5.186327   6.521751
    42  O    3.665044   4.797475   5.000145   4.149867   2.759087
    43  H    4.928158   6.285783   6.889279   6.317090   4.958995
                    6          7          8          9         10
     6  C    0.000000
     7  O    4.177076   0.000000
     8  C    1.497900   5.674134   0.000000
     9  C    2.572800   6.562343   1.482102   0.000000
    10  C    3.806642   7.887281   2.454364   1.349969   0.000000
    11  C    5.099168   9.030252   3.855040   2.527718   1.456322
    12  C    6.271014  10.314654   4.901531   3.753901   2.465877
    13  C    7.522229  11.469102   6.210920   4.959689   3.756771
    14  C    7.799956  11.501698   6.651569   5.249147   4.277800
    15  C    6.906361  10.378267   5.935954   4.463655   3.793156
    16  C    5.528769   9.100054   4.557187   3.081237   2.528154
    17  O    9.114745  12.719129   8.000522   6.581762   5.639261
    18  C    5.080887   1.430131   6.533507   7.602255   8.882137
    19  C    6.462131   2.391681   7.941446   8.921764  10.231533
    20  C    6.933340   2.853562   8.419587   9.253576  10.584911
    21  C    8.304926   4.201779   9.793021  10.585986  11.923668
    22  C    9.155694   4.986411  10.649550  11.524612  12.858788
    23  C    8.809344   4.739158  10.281338  11.265422  12.575356
    24  C    7.525133   3.591524   8.978119  10.018286  11.308774
    25  H    2.173221   4.463328   2.832826   2.716106   4.016654
    26  H    3.422724   2.523052   4.729613   5.076724   6.415682
    27  H    3.413311   2.745371   4.621604   5.948379   7.075046
    28  H    2.133835   4.593582   2.621116   4.097705   4.979638
    29  H    2.769662   6.301017   2.222722   1.084176   2.119725
    30  H    6.349900  10.496478   4.888832   4.006968   2.658491
    31  H    8.422783  12.440253   7.052121   5.890931   4.619288
    32  H    7.445908  10.624827   6.634755   5.153952   4.683207
    33  H    4.979275   8.260026   4.263754   2.812781   2.770174
    34  H    9.678983  13.414481   8.477128   7.113868   6.051371
    35  H    5.127337   2.082068   6.514657   7.661535   8.897864
    36  H    5.058648   2.070592   6.442604   7.594430   8.827652
    37  H    6.380766   2.596128   7.839985   8.583183   9.909469
    38  H    8.826783   4.865646  10.294742  10.987190  12.321789
    39  H   10.214329   6.041305  11.709966  12.555229  13.894153
    40  H    9.655382   5.674700  11.107137  12.127694  13.422822
    41  H    7.485741   3.905733   8.880824  10.000960  11.248845
    42  O    2.364782   6.347192   1.233301   2.366139   2.795223
    43  H    4.070148   8.245399   2.580028   2.068642   1.089853
                   11         12         13         14         15
    11  C    0.000000
    12  C    1.406913   0.000000
    13  C    2.442734   1.390493   0.000000
    14  C    2.822331   2.412203   1.399134   0.000000
    15  C    2.440517   2.784915   2.423950   1.402817   0.000000
    16  C    1.411348   2.408554   2.788074   2.413194   1.385365
    17  O    4.183304   3.678015   2.425824   1.362119   2.361232
    18  C   10.116949  11.341480  12.557205  12.689914  11.623396
    19  C   11.407764  12.674413  13.848223  13.892122  12.761083
    20  C   11.668219  12.975608  14.083006  14.021547  12.833917
    21  C   12.969890  14.294627  15.372373  15.254860  14.033201
    22  C   13.953926  15.266323  16.378249  16.300665  15.091344
    23  C   13.742649  15.017261  16.182840  16.195104  15.034707
    24  C   12.515960  13.762392  14.957924  15.032987  13.915502
    25  H    4.831214   6.210380   7.206557   7.086543   5.921530
    26  H    7.292296   8.668427   9.661145   9.476222   8.243924
    27  H    8.448826   9.519666  10.831259  11.196186  10.318227
    28  H    6.423505   7.330426   8.691749   9.240593   8.556440
    29  H    2.817502   4.196460   5.213681   5.212406   4.186931
    30  H    2.155269   1.086528   2.142719   3.393642   3.871436
    31  H    3.425163   2.153723   1.087750   2.160366   3.411292
    32  H    3.428987   3.869522   3.398943   2.147128   1.084787
    33  H    2.165619   3.398679   3.873493   3.390117   2.131593
    34  H    4.622265   3.835069   2.456405   1.913317   3.172768
    35  H   10.175231  11.358061  12.604222  12.800951  11.779476
    36  H   10.108528  11.278721  12.526850  12.736981  11.729719
    37  H   10.941344  12.255520  13.328710  13.232164  12.037154
    38  H   13.296305  14.635992  15.660327  15.471126  14.221364
    39  H   14.963967  16.288230  17.379812  17.264542  16.033540
    40  H   14.610200  15.869141  17.049286  17.085266  15.937058
    41  H   12.503840  13.703896  14.934682  15.085056  14.019213
    42  O    4.246054   5.003501   6.383417   7.057724   6.558065
    43  H    2.167727   2.626571   4.015844   4.831076   4.607787
                   16         17         18         19         20
    16  C    0.000000
    17  O    3.633349   0.000000
    18  C   10.310492  13.942118   0.000000
    19  C   11.489875  15.105395   1.508921   0.000000
    20  C   11.622031  15.182130   2.529149   1.400436   0.000000
    21  C   12.857969  16.382552   3.809888   2.424077   1.393751
    22  C   13.890782  17.449791   4.313177   2.804924   2.419771
    23  C   13.785710  17.388617   3.807078   2.426820   2.789845
    24  C   12.634532  16.256325   2.519889   1.398173   2.412834
    25  H    4.675740   8.270268   5.754390   6.840524   6.963125
    26  H    7.071147  10.603528   3.951616   4.704510   4.659954
    27  H    8.941390  12.520483   2.565007   4.058147   4.990989
    28  H    7.176669  10.596689   4.912746   6.420127   7.193566
    29  H    2.839488   6.470202   7.478699   8.691289   8.898972
    30  H    3.395967   4.562454  11.419740  12.810138  13.195297
    31  H    3.875824   2.692566  13.488286  14.808549  15.073877
    32  H    2.158487   2.562871  11.930634  12.979961  12.964402
    33  H    1.085533   4.491522   9.525607  10.638998  10.717552
    34  H    4.323383   0.966566  14.598456  15.804651  15.922865
    35  H   10.447144  14.074014   1.097847   2.153796   3.420046
    36  H   10.397595  14.011722   1.100159   2.156710   2.955526
    37  H   10.851108  14.372137   2.726067   2.151274   1.085273
    38  H   13.099650  16.552969   4.677957   3.405834   2.150360
    39  H   14.857601  18.391241   5.399160   3.890961   3.403829
    40  H   14.680849  18.286317   4.671521   3.407675   3.875889
    41  H   12.712187  16.335243   2.718197   2.154427   3.399037
    42  O    5.229449   8.419669   6.998567   8.471906   9.072834
    43  H    3.466100   6.177637   9.106273  10.521244  10.975682
                   21         22         23         24         25
    21  C    0.000000
    22  C    1.396972   0.000000
    23  C    2.413880   1.394615   0.000000
    24  C    2.785085   2.416996   1.396039   0.000000
    25  H    8.212869   9.218892   9.130799   8.018706   0.000000
    26  H    5.833141   6.850516   6.883366   5.914592   2.461237
    27  H    6.325965   6.844998   6.202241   4.830433   4.961597
    28  H    8.575571   9.222839   8.638790   7.265734   4.290627
    29  H   10.181456  11.172002  11.012319   9.832656   2.015420
    30  H   14.545083  15.474960  15.154250  13.859169   6.647918
    31  H   16.377242  17.373239  17.149777  15.904518   8.238907
    32  H   14.102972  15.184525  15.202695  14.146021   6.177876
    33  H   11.921354  12.964711  12.904787  11.795110   3.800543
    34  H   17.148609  18.205262  18.107750  16.945443   8.995806
    35  H    4.570732   4.810392   4.012805   2.622373   6.026695
    36  H    4.223731   4.789898   4.344309   3.124448   5.964218
    37  H    2.155781   3.404741   3.875074   3.394558   6.247215
    38  H    1.086185   2.156340   3.399209   3.871252   8.531609
    39  H    2.157537   1.086038   2.155486   3.402247  10.197365
    40  H    3.400572   2.155879   1.086065   2.152903  10.053909
    41  H    3.872315   3.400535   2.153660   1.087272   8.201653
    42  O   10.463493  11.244788  10.771838   9.422893   4.049791
    43  H   12.343411  13.224775  12.856314  11.544891   4.768851
                   26         27         28         29         30
    26  H    0.000000
    27  H    4.302262   0.000000
    28  H    4.948334   2.475317   0.000000
    29  H    4.475542   6.159273   4.665146   0.000000
    30  H    9.067667   9.419823   7.099606   4.677927   0.000000
    31  H   10.698470  11.666175   9.440961   6.233379   2.468929
    32  H    8.351136  10.828709   9.236572   4.677311   4.956005
    33  H    6.118918   8.357391   6.824004   2.211646   4.302325
    34  H   11.373558  13.059731  11.030452   7.123212   4.549441
    35  H    4.448079   2.336078   4.697872   7.627610  11.380062
    36  H    4.406634   2.295663   4.634398   7.567427  11.290248
    37  H    3.983221   4.879540   6.855580   8.180379  12.513359
    38  H    6.146872   7.120120   9.261755  10.510651  14.940448
    39  H    7.793742   7.927614  10.308355  12.169654  16.518722
    40  H    7.843908   6.920756   9.362751  11.906261  15.979060
    41  H    6.288556   4.589953   6.996172   9.907593  13.737173
    42  O    5.774044   4.769426   2.382212   3.318949   4.719139
    43  H    7.054713   7.069034   4.766986   3.050175   2.352429
                   31         32         33         34         35
    31  H    0.000000
    32  H    4.296711   0.000000
    33  H    4.961233   2.471542   0.000000
    34  H    2.305474   3.509152   5.267608   0.000000
    35  H   13.508082  12.135027   9.706638  14.700618   0.000000
    36  H   13.422861  12.097355   9.673238  14.630134   1.773941
    37  H   14.326214  12.148431   9.941445  15.120465   3.762220
    38  H   16.679085  14.228338  12.138590  17.342935   5.526201
    39  H   18.384444  16.087341  13.911826  19.163390   5.876264
    40  H   18.005504  16.116424  13.810806  18.996701   4.688435
    41  H   15.849821  14.309075  11.922219  16.989205   2.371746
    42  O    7.084063   7.376731   5.148249   8.774132   6.869235
    43  H    4.684234   5.578222   3.837827   6.443175   9.045479
                   36         37         38         39         40
    36  H    0.000000
    37  H    2.999370   0.000000
    38  H    5.018198   2.480318   0.000000
    39  H    5.852724   4.302282   2.485909   0.000000
    40  H    5.196542   4.961096   4.299964   2.486323   0.000000
    41  H    3.295426   4.292985   4.958466   4.298173   2.475415
    42  O    6.793786   8.563066  11.030562  12.322109  11.543846
    43  H    8.972960  10.350200  12.801792  14.281652  13.667992
                   41         42         43
    41  H    0.000000
    42  O    9.217558   0.000000
    43  H   11.405172   2.400516   0.000000
 Stoichiometry    C22H18O3
 Framework group  C1[X(C22H18O3)]
 Deg. of freedom   123
 Full point group                 C1      NOp   1
 Largest Abelian subgroup         C1      NOp   1
 Largest concise Abelian subgroup C1      NOp   1
                         Standard orientation:                         
 ---------------------------------------------------------------------
 Center     Atomic      Atomic             Coordinates (Angstroms)
 Number     Number       Type             X           Y           Z
 ---------------------------------------------------------------------
      1          6           0        0.101454   -0.354772    0.055294
      2          6           0        1.434474   -0.734336    0.100787
      3          6           0        2.447458    0.234900    0.033908
      4          6           0        2.103675    1.590324   -0.078159
      5          6           0        0.761656    1.952816   -0.124627
      6          6           0       -0.264578    0.999542   -0.059638
      7          8           0        3.721235   -0.240844    0.091038
      8          6           0       -1.675311    1.499587   -0.118716
      9          6           0       -2.794335    0.531822   -0.030149
     10          6           0       -4.070999    0.967201   -0.084821
     11          6           0       -5.298301    0.186559   -0.012706
     12          6           0       -6.533088    0.846854   -0.149508
     13          6           0       -7.739417    0.157328   -0.096646
     14          6           0       -7.738041   -1.227732    0.101298
     15          6           0       -6.520789   -1.909760    0.246323
     16          6           0       -5.326536   -1.209902    0.189784
     17          8           0       -8.879919   -1.967593    0.165242
     18          6           0        4.806313    0.685924   -0.003726
     19          6           0        6.106315   -0.079871    0.016082
     20          6           0        6.258386   -1.250545   -0.737322
     21          6           0        7.477022   -1.926799   -0.749535
     22          6           0        8.560853   -1.436986   -0.016784
     23          6           0        8.416370   -0.271125    0.734777
     24          6           0        7.192295    0.399824    0.754611
     25          1           0       -0.652146   -1.132208    0.108645
     26          1           0        1.721862   -1.776642    0.189146
     27          1           0        2.865727    2.358732   -0.126622
     28          1           0        0.475176    2.995204   -0.212446
     29          1           0       -2.573395   -0.524146    0.077347
     30          1           0       -6.542344    1.922501   -0.302612
     31          1           0       -8.680440    0.691638   -0.207058
     32          1           0       -6.538904   -2.982745    0.404870
     33          1           0       -4.395800   -1.755200    0.311285
     34          1           0       -9.644199   -1.386331    0.054512
     35          1           0        4.769180    1.399688    0.829600
     36          1           0        4.710492    1.259229   -0.937797
     37          1           0        5.413421   -1.634002   -1.300183
     38          1           0        7.582183   -2.837076   -1.332747
     39          1           0        9.510297   -1.964138   -0.028869
     40          1           0        9.251374    0.112450    1.313720
     41          1           0        7.080781    1.301902    1.351250
     42          8           0       -1.889614    2.708529   -0.235189
     43          1           0       -4.196122    2.045302   -0.183922
 ---------------------------------------------------------------------
 Rotational constants (GHZ):      0.8348546      0.0500957      0.0476127
 Standard basis: 6-31G(d,p) (6D, 7F)
 There are   465 symmetry adapted basis functions of A   symmetry.
 Integral buffers will be    262144 words long.
 Raffenetti 2 integral format.
 Two-electron integral symmetry is turned on.
   465 basis functions,   826 primitive gaussians,   465 cartesian basis functions
    87 alpha electrons       87 beta electrons
       nuclear repulsion energy      1775.7101636640 Hartrees.
 NAtoms=   43 NActive=   43 NUniq=   43 SFac= 7.50D-01 NAtFMM=   80 NAOKFM=F Big=F
 One-electron integrals computed using PRISM.
 NBasis=   465 RedAO= T  NBF=   465
 NBsUse=   465 1.00D-06 NBFU=   465
 Initial guess read from the read-write file.
 B after Tr=     0.000000    0.000000    0.000000
         Rot=    1.000000    0.000000    0.000000    0.000000 Ang=   0.00 deg.
 Initial guess orbital symmetries:
       Occupied  (A) (A) (A) (A) (A) (A) (A) (A) (A) (A) (A) (A)
                 (A) (A) (A) (A) (A) (A) (A) (A) (A) (A) (A) (A)
                 (A) (A) (A) (A) (A) (A) (A) (A) (A) (A) (A) (A)
                 (A) (A) (A) (A) (A) (A) (A) (A) (A) (A) (A) (A)
                 (A) (A) (A) (A) (A) (A) (A) (A) (A) (A) (A) (A)
                 (A) (A) (A) (A) (A) (A) (A) (A) (A) (A) (A) (A)
                 (A) (A) (A) (A) (A) (A) (A) (A) (A) (A) (A) (A)
                 (A) (A) (A)
       Virtual   (A) (A) (A) (A) (A) (A) (A) (A) (A) (A) (A) (A)
                 (A) (A) (A) (A) (A) (A) (A) (A) (A) (A) (A) (A)
                 (A) (A) (A) (A) (A) (A) (A) (A) (A) (A) (A) (A)
                 (A) (A) (A) (A) (A) (A) (A) (A) (A) (A) (A) (A)
                 (A) (A) (A) (A) (A) (A) (A) (A) (A) (A) (A) (A)
                 (A) (A) (A) (A) (A) (A) (A) (A) (A) (A) (A) (A)
                 (A) (A) (A) (A) (A) (A) (A) (A) (A) (A) (A) (A)
                 (A) (A) (A) (A) (A) (A) (A) (A) (A) (A) (A) (A)
                 (A) (A) (A) (A) (A) (A) (A) (A) (A) (A) (A) (A)
                 (A) (A) (A) (A) (A) (A) (A) (A) (A) (A) (A) (A)
                 (A) (A) (A) (A) (A) (A) (A) (A) (A) (A) (A) (A)
                 (A) (A) (A) (A) (A) (A) (A) (A) (A) (A) (A) (A)
                 (A) (A) (A) (A) (A) (A) (A) (A) (A) (A) (A) (A)
                 (A) (A) (A) (A) (A) (A) (A) (A) (A) (A) (A) (A)
                 (A) (A) (A) (A) (A) (A) (A) (A) (A) (A) (A) (A)
                 (A) (A) (A) (A) (A) (A) (A) (A) (A) (A) (A) (A)
                 (A) (A) (A) (A) (A) (A) (A) (A) (A) (A) (A) (A)
                 (A) (A) (A) (A) (A) (A) (A) (A) (A) (A) (A) (A)
                 (A) (A) (A) (A) (A) (A) (A) (A) (A) (A) (A) (A)
                 (A) (A) (A) (A) (A) (A) (A) (A) (A) (A) (A) (A)
                 (A) (A) (A) (A) (A) (A) (A) (A) (A) (A) (A) (A)
                 (A) (A) (A) (A) (A) (A) (A) (A) (A) (A) (A) (A)
                 (A) (A) (A) (A) (A) (A) (A) (A) (A) (A) (A) (A)
                 (A) (A) (A) (A) (A) (A) (A) (A) (A) (A) (A) (A)
                 (A) (A) (A) (A) (A) (A) (A) (A) (A) (A) (A) (A)
                 (A) (A) (A) (A) (A) (A) (A) (A) (A) (A) (A) (A)
                 (A) (A) (A) (A) (A) (A) (A) (A) (A) (A) (A) (A)
                 (A) (A) (A) (A) (A) (A) (A) (A) (A) (A) (A) (A)
                 (A) (A) (A) (A) (A) (A) (A) (A) (A) (A) (A) (A)
                 (A) (A) (A) (A) (A) (A) (A) (A) (A) (A) (A) (A)
                 (A) (A) (A) (A) (A) (A) (A) (A) (A) (A) (A) (A)
                 (A) (A) (A) (A) (A) (A)
 Harris functional with IExCor=  402 diagonalized for initial guess.
 ExpMin= 1.61D-01 ExpMax= 5.48D+03 ExpMxC= 8.25D+02 IAcc=1 IRadAn=         1 AccDes= 0.00D+00
 HarFok:  IExCor=  402 AccDes= 0.00D+00 IRadAn=         1 IDoV= 1
 ScaDFX=  1.000000  1.000000  1.000000  1.000000
 FoFCou: FMM=F IPFlag=           0 FMFlag=      100000 FMFlg1=           0
         NFxFlg=           0 DoJE=T BraDBF=F KetDBF=T FulRan=T
         Omega=  0.000000  0.000000  1.000000  0.000000  0.000000 ICntrl=     500 IOpCl=  0
         NMat0=    1 NMatS0=    1 NMatT0=    0 NMatD0=    1 NMtDS0=    0 NMtDT0=    0
         I1Cent=           4 NGrid=           0.
 Petite list used in FoFCou.
 Requested convergence on RMS density matrix=1.00D-08 within 128 cycles.
 Requested convergence on MAX density matrix=1.00D-06.
 Requested convergence on             energy=1.00D-06.
 No special actions if energy rises.
 Integral accuracy reduced to 1.0D-05 until final iterations.
 Initial convergence to 1.0D-05 achieved.  Increase integral accuracy.
 SCF Done:  E(RB3LYP) =  -1074.86447316     A.U. after   16 cycles
             Convg  =    0.7201D-08             -V/T =  2.0095
 Calling FoFJK, ICntrl=      2127 FMM=F ISym2X=0 I1Cent= 0 IOpClX= 0 NMat=1 NMatS=1 NMatT=0.
 ***** Axes restored to original set *****
 -------------------------------------------------------------------
 Center     Atomic                   Forces (Hartrees/Bohr)
 Number     Number              X              Y              Z
 -------------------------------------------------------------------
      1        6           0.000182836   -0.000056232   -0.000034551
      2        6           0.000066551    0.000009579    0.000104052
      3        6          -0.000176927    0.000004053   -0.000000799
      4        6           0.000120597    0.000013527   -0.000147775
      5        6           0.000028065    0.000002024    0.000170693
      6        6          -0.000160909   -0.000120653   -0.000280177
      7        8           0.000002756    0.000001847    0.000031393
      8        6           0.000984596    0.000652603    0.000134416
      9        6          -0.000597846   -0.000265454   -0.000601116
     10        6           0.001705760    0.001387681    0.000592119
     11        6          -0.000588247   -0.000069244   -0.000387666
     12        6           0.000155465    0.000018499    0.000274578
     13        6          -0.000372512    0.000081071   -0.000050282
     14        6           0.000294646   -0.000021924   -0.000094692
     15        6           0.000030351    0.000068809    0.000182112
     16        6          -0.000212124   -0.000040097    0.000082102
     17        8          -0.000048765    0.000009503   -0.000068239
     18        6          -0.000029139   -0.000007570   -0.000029362
     19        6          -0.000013572   -0.000014598    0.000010335
     20        6          -0.000005699    0.000005978   -0.000006003
     21        6           0.000007272    0.000000791    0.000010212
     22        6          -0.000008732   -0.000010288   -0.000000356
     23        6           0.000000449    0.000001428   -0.000005667
     24        6           0.000012457   -0.000007101    0.000001647
     25        1          -0.000062536   -0.000034652   -0.000096749
     26        1          -0.000019632   -0.000000770   -0.000000152
     27        1          -0.000007114    0.000010798    0.000003618
     28        1           0.000012703    0.000004695    0.000079562
     29        1           0.000259879   -0.000274565    0.000104819
     30        1          -0.000033634   -0.000032082    0.000068109
     31        1          -0.000025427   -0.000004560   -0.000032765
     32        1           0.000006601   -0.000036296   -0.000050809
     33        1           0.000021779   -0.000158408   -0.000120711
     34        1           0.000001788   -0.000014308    0.000010732
     35        1          -0.000003226    0.000013013    0.000003503
     36        1           0.000018795    0.000005492    0.000004139
     37        1           0.000006914   -0.000000809   -0.000000778
     38        1           0.000002299   -0.000008050   -0.000002406
     39        1          -0.000000452   -0.000005331    0.000000076
     40        1          -0.000003577   -0.000000767    0.000002143
     41        1          -0.000004666    0.000003919    0.000003994
     42        8          -0.001225395   -0.000120136   -0.000153524
     43        1          -0.000322425   -0.000991414    0.000290221
 -------------------------------------------------------------------
 Cartesian Forces:  Max     0.001705760 RMS     0.000299181

 GradGradGradGradGradGradGradGradGradGradGradGradGradGradGradGradGradGrad
 Berny optimization.
 Using GEDIIS/GDIIS optimizer.
 Internal  Forces:  Max     0.001044197 RMS     0.000168362
 Search for a local minimum.
 Step number   5 out of a maximum of  227
 All quantities printed in internal units (Hartrees-Bohrs-Radians)
 Mixed Optimization -- En-DIIS/RFO-DIIS
 Swaping is turned off.
 Update second derivatives using D2CorX and points    1    2    3    4    5
 DE= -7.94D-05 DEPred=-8.70D-05 R= 9.13D-01
 SS=  1.41D+00  RLast= 7.37D-02 DXNew= 1.1436D+00 2.2121D-01
 Trust test= 9.13D-01 RLast= 7.37D-02 DXMaxT set to 6.80D-01
     Eigenvalues ---    0.00633   0.00656   0.00977   0.01294   0.01321
     Eigenvalues ---    0.01516   0.01595   0.01663   0.01777   0.01866
     Eigenvalues ---    0.01987   0.02002   0.02058   0.02086   0.02089
     Eigenvalues ---    0.02095   0.02100   0.02103   0.02118   0.02120
     Eigenvalues ---    0.02125   0.02129   0.02132   0.02139   0.02142
     Eigenvalues ---    0.02143   0.02147   0.02148   0.02150   0.02152
     Eigenvalues ---    0.02156   0.02173   0.02184   0.02194   0.02203
     Eigenvalues ---    0.02210   0.02261   0.02746   0.06389   0.07338
     Eigenvalues ---    0.11387   0.13891   0.14155   0.15877   0.15998
     Eigenvalues ---    0.15999   0.16000   0.16000   0.16000   0.16000
     Eigenvalues ---    0.16000   0.16000   0.16000   0.16000   0.16000
     Eigenvalues ---    0.16005   0.16026   0.16138   0.20181   0.20346
     Eigenvalues ---    0.22000   0.22000   0.22003   0.22019   0.22069
     Eigenvalues ---    0.22961   0.22963   0.23471   0.23871   0.23988
     Eigenvalues ---    0.24113   0.24978   0.24982   0.25000   0.25000
     Eigenvalues ---    0.25007   0.26866   0.28390   0.31466   0.32737
     Eigenvalues ---    0.33648   0.33907   0.35019   0.35131   0.35203
     Eigenvalues ---    0.35261   0.35274   0.35277   0.35363   0.35379
     Eigenvalues ---    0.35408   0.35435   0.35461   0.35505   0.35517
     Eigenvalues ---    0.35623   0.36678   0.37281   0.39111   0.40978
     Eigenvalues ---    0.41001   0.41504   0.41764   0.41956   0.41976
     Eigenvalues ---    0.42289   0.44650   0.44803   0.45059   0.45430
     Eigenvalues ---    0.45836   0.46021   0.46031   0.46356   0.46551
     Eigenvalues ---    0.46644   0.47641   0.48033   0.52544   0.52787
     Eigenvalues ---    0.54077   0.57005   0.905591000.000001000.00000
     Eigenvalues --- 1000.000001000.000001000.000001000.000001000.00000
     Eigenvalues --- 1000.000001000.000001000.000001000.000001000.00000
     Eigenvalues --- 1000.000001000.000001000.000001000.000001000.00000
     Eigenvalues --- 1000.000001000.000001000.000001000.000001000.00000
     Eigenvalues --- 1000.000001000.000001000.000001000.000001000.00000
     Eigenvalues --- 1000.000001000.000001000.000001000.000001000.00000
     Eigenvalues --- 1000.000001000.000001000.000001000.000001000.00000
     Eigenvalues --- 1000.000001000.000001000.000001000.000001000.00000
     Eigenvalues --- 1000.000001000.000001000.000001000.000001000.00000
     Eigenvalues --- 1000.000001000.000001000.000001000.000001000.00000
     Eigenvalues --- 1000.000001000.000001000.000001000.000001000.00000
     Eigenvalues --- 1000.000001000.000001000.000001000.000001000.00000
     Eigenvalues --- 1000.000001000.000001000.000001000.000001000.00000
     Eigenvalues --- 1000.000001000.000001000.000001000.000001000.00000
     Eigenvalues --- 1000.000001000.000001000.000001000.000001000.00000
     Eigenvalues --- 1000.000001000.000001000.000001000.000001000.00000
     Eigenvalues --- 1000.000001000.000001000.000001000.000001000.00000
     Eigenvalues --- 1000.000001000.000001000.000001000.000001000.00000
     Eigenvalues --- 1000.000001000.00000
 En-DIIS/RFO-DIIS IScMMF=        0 using points:     5    4
 RFO step:  Lambda=-1.81533532D-05.
 DIIS coeffs:      0.90907      0.09093
 Iteration  1 RMS(Cart)=  0.00987546 RMS(Int)=  0.00009510
 Iteration  2 RMS(Cart)=  0.00020279 RMS(Int)=  0.00001632
 Iteration  3 RMS(Cart)=  0.00000001 RMS(Int)=  0.00001632
 Variable       Old X    -DE/DX   Delta X   Delta X   Delta X     New X
                                  (DIIS)     (GDIIS)  (Total)
    R1        2.62058   0.00004  -0.00006   0.00059   0.00053   2.62111
    R2        2.65999  -0.00012   0.00006  -0.00090  -0.00084   2.65915
    R3        2.04856   0.00010   0.00001   0.00014   0.00016   2.04872
    R4        2.65238  -0.00011   0.00005  -0.00064  -0.00059   2.65179
    R5        2.04998   0.00002  -0.00001   0.00008   0.00008   2.05006
    R6        2.65096   0.00013   0.00000   0.00033   0.00032   2.65128
    R7        2.57177   0.00002   0.00001  -0.00006  -0.00005   2.57172
    R8        2.62840  -0.00006  -0.00001  -0.00011  -0.00012   2.62828
    R9        2.04713   0.00000   0.00000   0.00000   0.00000   2.04712
   R10        2.64974   0.00015  -0.00014   0.00133   0.00119   2.65093
   R11        2.04960  -0.00003  -0.00001  -0.00002  -0.00003   2.04957
   R12        2.83062  -0.00018   0.00000  -0.00003  -0.00003   2.83059
   R13        2.70256  -0.00002   0.00001  -0.00013  -0.00012   2.70244
   R14        2.80077  -0.00035  -0.00057   0.00582   0.00525   2.80602
   R15        2.33060  -0.00104   0.00052  -0.00524  -0.00472   2.32588
   R16        2.55107  -0.00065   0.00031  -0.00378  -0.00347   2.54760
   R17        2.04880  -0.00020   0.00003  -0.00062  -0.00059   2.04820
   R18        2.75205   0.00069  -0.00005   0.00196   0.00190   2.75395
   R19        2.05952  -0.00037   0.00009  -0.00122  -0.00113   2.05840
   R20        2.65868  -0.00020   0.00019  -0.00187  -0.00168   2.65700
   R21        2.66706   0.00013  -0.00009   0.00104   0.00095   2.66801
   R22        2.62765   0.00022  -0.00001   0.00057   0.00055   2.62821
   R23        2.05324  -0.00005   0.00000  -0.00009  -0.00009   2.05315
   R24        2.64398  -0.00025  -0.00002  -0.00042  -0.00043   2.64355
   R25        2.05555   0.00002   0.00000   0.00004   0.00004   2.05559
   R26        2.65094   0.00008  -0.00006   0.00061   0.00056   2.65150
   R27        2.57403   0.00007   0.00000   0.00011   0.00012   2.57415
   R28        2.61796  -0.00006   0.00005  -0.00056  -0.00050   2.61746
   R29        2.04995  -0.00002   0.00000  -0.00007  -0.00007   2.04988
   R30        2.05136  -0.00013   0.00000  -0.00031  -0.00031   2.05105
   R31        1.82655  -0.00001  -0.00001   0.00003   0.00002   1.82657
   R32        2.85145   0.00001   0.00000   0.00005   0.00005   2.85149
   R33        2.07463   0.00001   0.00000   0.00003   0.00003   2.07466
   R34        2.07900   0.00001   0.00000   0.00002   0.00002   2.07902
   R35        2.64644  -0.00001   0.00000  -0.00004  -0.00004   2.64640
   R36        2.64216   0.00001   0.00000   0.00002   0.00002   2.64218
   R37        2.63381   0.00001   0.00000   0.00002   0.00002   2.63383
   R38        2.05087   0.00000   0.00000  -0.00003  -0.00002   2.05084
   R39        2.63990  -0.00001   0.00000  -0.00001  -0.00001   2.63988
   R40        2.05259   0.00000   0.00000   0.00000   0.00000   2.05259
   R41        2.63544   0.00000   0.00000   0.00001   0.00001   2.63545
   R42        2.05231   0.00000   0.00000   0.00000   0.00000   2.05231
   R43        2.63813   0.00000   0.00000   0.00000   0.00000   2.63813
   R44        2.05237   0.00000   0.00000   0.00000   0.00000   2.05237
   R45        2.05465   0.00000   0.00000   0.00000   0.00000   2.05465
    A1        2.11296   0.00009   0.00002   0.00001   0.00003   2.11299
    A2        2.06046   0.00001   0.00010  -0.00064  -0.00055   2.05991
    A3        2.10977  -0.00010  -0.00012   0.00063   0.00051   2.11028
    A4        2.09807  -0.00002  -0.00008   0.00055   0.00047   2.09854
    A5        2.11801   0.00000   0.00005  -0.00042  -0.00037   2.11764
    A6        2.06710   0.00002   0.00004  -0.00013  -0.00010   2.06700
    A7        2.08766  -0.00002   0.00002  -0.00015  -0.00014   2.08752
    A8        2.01762   0.00000   0.00000   0.00001   0.00000   2.01763
    A9        2.17790   0.00002  -0.00002   0.00015   0.00013   2.17803
   A10        2.08396   0.00002   0.00006  -0.00037  -0.00032   2.08364
   A11        2.11360  -0.00002   0.00004  -0.00038  -0.00034   2.11326
   A12        2.08562   0.00000  -0.00010   0.00075   0.00065   2.08628
   A13        2.12638  -0.00002  -0.00009   0.00053   0.00045   2.12683
   A14        2.10370  -0.00007   0.00005  -0.00050  -0.00045   2.10325
   A15        2.05311   0.00009   0.00004  -0.00003   0.00000   2.05311
   A16        2.05734  -0.00005   0.00008  -0.00057  -0.00049   2.05685
   A17        2.17647  -0.00034  -0.00029   0.00109   0.00081   2.17728
   A18        2.04937   0.00040   0.00021  -0.00053  -0.00031   2.04905
   A19        2.07239  -0.00001   0.00001  -0.00007  -0.00005   2.07234
   A20        2.08375  -0.00005  -0.00029   0.00077   0.00048   2.08423
   A21        2.08819   0.00078   0.00007   0.00249   0.00257   2.09075
   A22        2.11124  -0.00073   0.00021  -0.00325  -0.00304   2.10821
   A23        2.09557  -0.00061   0.00062  -0.00696  -0.00634   2.08923
   A24        2.08064   0.00008  -0.00012   0.00021   0.00008   2.08072
   A25        2.10698   0.00052  -0.00050   0.00675   0.00625   2.11323
   A26        2.24221  -0.00046   0.00063  -0.00500  -0.00450   2.23771
   A27        2.01672   0.00006  -0.00006  -0.00002  -0.00022   2.01650
   A28        2.02418   0.00041  -0.00056   0.00536   0.00466   2.02883
   A29        2.07516  -0.00009  -0.00015   0.00117   0.00102   2.07618
   A30        2.15838   0.00010   0.00035  -0.00256  -0.00221   2.15617
   A31        2.04965  -0.00001  -0.00020   0.00139   0.00119   2.05084
   A32        2.12350   0.00000   0.00019  -0.00135  -0.00116   2.12233
   A33        2.07807  -0.00006  -0.00009   0.00053   0.00045   2.07852
   A34        2.08161   0.00006  -0.00010   0.00082   0.00072   2.08233
   A35        2.08912   0.00001  -0.00007   0.00056   0.00049   2.08961
   A36        2.09796   0.00003   0.00010  -0.00059  -0.00050   2.09747
   A37        2.09610  -0.00004  -0.00003   0.00003   0.00001   2.09611
   A38        2.09067   0.00001  -0.00008   0.00060   0.00052   2.09119
   A39        2.14542  -0.00002   0.00006  -0.00044  -0.00038   2.14504
   A40        2.04709   0.00001   0.00002  -0.00016  -0.00013   2.04695
   A41        2.09230   0.00000   0.00014  -0.00106  -0.00092   2.09138
   A42        2.07318  -0.00005  -0.00004   0.00000  -0.00004   2.07314
   A43        2.11770   0.00005  -0.00010   0.00107   0.00097   2.11867
   A44        2.12111  -0.00002   0.00002  -0.00011  -0.00009   2.12101
   A45        2.08971   0.00001   0.00021  -0.00179  -0.00158   2.08813
   A46        2.07235   0.00001  -0.00023   0.00192   0.00169   2.07403
   A47        1.90799  -0.00001   0.00001  -0.00012  -0.00011   1.90788
   A48        1.90067   0.00001   0.00000   0.00001   0.00001   1.90068
   A49        1.92342   0.00000   0.00001  -0.00004  -0.00003   1.92338
   A50        1.90485   0.00000   0.00001   0.00002   0.00002   1.90487
   A51        1.92744  -0.00001  -0.00001   0.00000   0.00000   1.92744
   A52        1.92907  -0.00001  -0.00001   0.00000   0.00000   1.92906
   A53        1.87834   0.00000  -0.00001   0.00001   0.00000   1.87834
   A54        2.10684   0.00001  -0.00001   0.00009   0.00008   2.10692
   A55        2.09669  -0.00001   0.00001  -0.00010  -0.00009   2.09660
   A56        2.07902   0.00000   0.00000   0.00001   0.00001   2.07903
   A57        2.10048   0.00000   0.00000  -0.00001  -0.00001   2.10047
   A58        2.08269   0.00000   0.00000  -0.00004  -0.00004   2.08265
   A59        2.09991   0.00000   0.00000   0.00005   0.00005   2.09996
   A60        2.09861   0.00000   0.00000   0.00002   0.00001   2.09862
   A61        2.08976   0.00000   0.00000  -0.00002  -0.00002   2.08974
   A62        2.09481   0.00000   0.00000   0.00001   0.00001   2.09482
   A63        2.08910   0.00000   0.00000  -0.00002  -0.00002   2.08908
   A64        2.09698   0.00000   0.00000   0.00002   0.00002   2.09700
   A65        2.09710   0.00000   0.00000   0.00000   0.00000   2.09710
   A66        2.09471   0.00000   0.00000   0.00001   0.00001   2.09472
   A67        2.09771   0.00000   0.00000  -0.00001  -0.00001   2.09770
   A68        2.09072   0.00000   0.00000   0.00000   0.00000   2.09072
   A69        2.10440   0.00000   0.00000  -0.00002  -0.00001   2.10439
   A70        2.08845   0.00000   0.00000   0.00005   0.00005   2.08850
   A71        2.09033   0.00000   0.00000  -0.00003  -0.00003   2.09030
    D1        0.00132  -0.00001  -0.00002  -0.00015  -0.00017   0.00115
    D2       -3.14142   0.00000  -0.00002   0.00007   0.00004  -3.14138
    D3        3.14060  -0.00001   0.00004  -0.00085  -0.00081   3.13979
    D4       -0.00215  -0.00001   0.00004  -0.00063  -0.00059  -0.00274
    D5       -0.00165   0.00002   0.00003   0.00057   0.00059  -0.00106
    D6        3.13927   0.00001   0.00008  -0.00013  -0.00005   3.13922
    D7       -3.14086   0.00002  -0.00003   0.00128   0.00125  -3.13962
    D8        0.00005   0.00002   0.00001   0.00059   0.00060   0.00066
    D9        0.00090   0.00000   0.00001  -0.00020  -0.00018   0.00072
   D10        3.13791   0.00000   0.00002   0.00002   0.00005   3.13795
   D11       -3.13957  -0.00001   0.00002  -0.00041  -0.00039  -3.13996
   D12       -0.00256   0.00000   0.00003  -0.00019  -0.00016  -0.00273
   D13       -0.00274   0.00000  -0.00001   0.00012   0.00010  -0.00264
   D14        3.13623   0.00000   0.00000   0.00005   0.00006   3.13629
   D15       -3.13929  -0.00001  -0.00002  -0.00012  -0.00015  -3.13944
   D16       -0.00032  -0.00001  -0.00001  -0.00018  -0.00019  -0.00051
   D17        3.11583  -0.00001   0.00001  -0.00042  -0.00041   3.11542
   D18       -0.03062   0.00000   0.00002  -0.00019  -0.00017  -0.03079
   D19        0.00243   0.00001   0.00002   0.00032   0.00034   0.00277
   D20       -3.14016   0.00000  -0.00002   0.00011   0.00009  -3.14007
   D21       -3.13658   0.00001   0.00000   0.00038   0.00038  -3.13620
   D22        0.00401   0.00000  -0.00003   0.00017   0.00014   0.00415
   D23       -0.00024  -0.00002  -0.00002  -0.00065  -0.00068  -0.00092
   D24       -3.14121  -0.00001  -0.00007  -0.00001  -0.00008  -3.14129
   D25       -3.14087  -0.00001   0.00001  -0.00045  -0.00044  -3.14130
   D26        0.00135   0.00000  -0.00003   0.00019   0.00016   0.00151
   D27        0.01887  -0.00002  -0.00066   0.00533   0.00466   0.02353
   D28       -3.12732   0.00015  -0.00001   0.00820   0.00820  -3.11913
   D29       -3.12339  -0.00003  -0.00062   0.00464   0.00402  -3.11937
   D30        0.01360   0.00014   0.00004   0.00751   0.00755   0.02115
   D31       -3.09374   0.00000  -0.00003   0.00064   0.00061  -3.09314
   D32        1.07270   0.00001  -0.00003   0.00065   0.00062   1.07332
   D33       -0.98643   0.00000  -0.00003   0.00066   0.00062  -0.98580
   D34       -3.13911   0.00014   0.00025   0.00349   0.00374  -3.13538
   D35        0.00127   0.00014   0.00014   0.00485   0.00498   0.00625
   D36        0.00714  -0.00004  -0.00041   0.00056   0.00015   0.00730
   D37       -3.13566  -0.00004  -0.00052   0.00192   0.00140  -3.13426
   D38       -3.13865   0.00004   0.00031  -0.00104  -0.00070  -3.13935
   D39       -0.01112   0.00053   0.00294   0.02951   0.03243   0.02131
   D40        0.00418   0.00003   0.00043  -0.00241  -0.00197   0.00221
   D41        3.13170   0.00053   0.00306   0.02813   0.03117  -3.12032
   D42       -3.09389   0.00010   0.00331  -0.01758  -0.01426  -3.10815
   D43        0.04872   0.00009   0.00313  -0.01733  -0.01418   0.03454
   D44        0.06182  -0.00040   0.00067  -0.04820  -0.04755   0.01427
   D45       -3.07876  -0.00041   0.00049  -0.04795  -0.04748  -3.12623
   D46        3.13594   0.00004  -0.00042   0.00481   0.00439   3.14033
   D47       -0.00310   0.00003  -0.00017   0.00223   0.00206  -0.00104
   D48       -0.00660   0.00006  -0.00025   0.00457   0.00431  -0.00229
   D49        3.13754   0.00004   0.00000   0.00198   0.00198   3.13953
   D50       -3.13747  -0.00004   0.00038  -0.00420  -0.00383  -3.14129
   D51        0.01101  -0.00008   0.00048  -0.00685  -0.00637   0.00464
   D52        0.00513  -0.00005   0.00020  -0.00395  -0.00375   0.00138
   D53       -3.12958  -0.00009   0.00030  -0.00660  -0.00629  -3.13587
   D54        0.00353  -0.00003   0.00015  -0.00231  -0.00216   0.00137
   D55       -3.13969  -0.00001   0.00014  -0.00167  -0.00154  -3.14122
   D56       -3.14062  -0.00001  -0.00011   0.00028   0.00017  -3.14045
   D57       -0.00065   0.00000  -0.00012   0.00092   0.00080   0.00014
   D58        0.00123  -0.00001   0.00001  -0.00071  -0.00070   0.00053
   D59        3.14034   0.00001  -0.00010   0.00122   0.00113   3.14146
   D60       -3.13874  -0.00002   0.00003  -0.00136  -0.00133  -3.14007
   D61        0.00037   0.00000  -0.00008   0.00058   0.00050   0.00087
   D62       -0.00266   0.00002  -0.00007   0.00131   0.00124  -0.00141
   D63        3.13540   0.00004  -0.00016   0.00322   0.00306   3.13846
   D64        3.14128  -0.00001   0.00004  -0.00052  -0.00048   3.14080
   D65       -0.00385   0.00002  -0.00006   0.00139   0.00134  -0.00251
   D66       -0.00030   0.00000   0.00003  -0.00033  -0.00030  -0.00060
   D67        3.13887   0.00002  -0.00008   0.00156   0.00148   3.14036
   D68       -0.00061   0.00002  -0.00005   0.00110   0.00105   0.00044
   D69        3.13416   0.00006  -0.00015   0.00371   0.00356   3.13772
   D70       -3.13858  -0.00001   0.00005  -0.00086  -0.00081  -3.13939
   D71       -0.00380   0.00003  -0.00005   0.00174   0.00170  -0.00211
   D72        0.76081  -0.00001   0.00013  -0.00222  -0.00209   0.75871
   D73       -2.41952  -0.00001   0.00013  -0.00226  -0.00214  -2.42165
   D74        2.87508   0.00000   0.00014  -0.00226  -0.00213   2.87296
   D75       -0.30524   0.00000   0.00014  -0.00231  -0.00217  -0.30741
   D76       -1.33157  -0.00001   0.00012  -0.00225  -0.00213  -1.33369
   D77        1.77129  -0.00001   0.00012  -0.00229  -0.00217   1.76912
   D78        3.10308   0.00000   0.00000  -0.00001  -0.00002   3.10306
   D79       -0.05399   0.00000   0.00001  -0.00009  -0.00008  -0.05408
   D80       -0.00017   0.00000  -0.00001   0.00004   0.00003  -0.00014
   D81        3.12594   0.00000   0.00001  -0.00005  -0.00004   3.12591
   D82       -3.09459   0.00000   0.00000   0.00000   0.00000  -3.09459
   D83        0.04974   0.00000  -0.00001   0.00016   0.00015   0.04988
   D84        0.00889   0.00000   0.00000  -0.00005  -0.00004   0.00885
   D85       -3.12997   0.00000  -0.00001   0.00012   0.00011  -3.12987
   D86       -0.00763   0.00000   0.00000  -0.00001  -0.00001  -0.00764
   D87        3.13534   0.00000   0.00001  -0.00005  -0.00005   3.13529
   D88       -3.13359   0.00000  -0.00001   0.00007   0.00006  -3.13353
   D89        0.00938   0.00000   0.00000   0.00003   0.00002   0.00940
   D90        0.00672   0.00000   0.00000   0.00000   0.00000   0.00672
   D91       -3.13959   0.00000   0.00000  -0.00001  -0.00001  -3.13960
   D92       -3.13625   0.00000  -0.00001   0.00004   0.00003  -3.13621
   D93        0.00063   0.00000   0.00000   0.00003   0.00003   0.00065
   D94        0.00195   0.00000   0.00000  -0.00001  -0.00001   0.00194
   D95        3.13308   0.00000   0.00001  -0.00004  -0.00004   3.13304
   D96       -3.13492   0.00000   0.00000   0.00000   0.00000  -3.13492
   D97       -0.00379   0.00000   0.00000  -0.00003  -0.00003  -0.00382
   D98       -0.00982   0.00000   0.00000   0.00003   0.00003  -0.00979
   D99        3.12903   0.00000   0.00001  -0.00013  -0.00012   3.12892
   D100      -3.14099   0.00000  -0.00001   0.00007   0.00006  -3.14093
   D101      -0.00214   0.00000   0.00001  -0.00010  -0.00009  -0.00222
         Item               Value     Threshold  Converged?
 Maximum Force            0.001044     0.000450     NO 
 RMS     Force            0.000168     0.000300     YES
 Maximum Displacement     0.081848     0.001800     NO 
 RMS     Displacement     0.009828     0.001200     NO 
 Predicted change in Energy=-4.928150D-05
 GradGradGradGradGradGradGradGradGradGradGradGradGradGradGradGradGradGrad

                          Input orientation:                          
 ---------------------------------------------------------------------
 Center     Atomic      Atomic             Coordinates (Angstroms)
 Number     Number       Type             X           Y           Z
 ---------------------------------------------------------------------
      1          6           0        0.112726    0.032937   -0.052474
      2          6           0        0.080550    0.039604    1.334167
      3          6           0        1.275701    0.009219    2.068910
      4          6           0        2.504387   -0.027093    1.392585
      5          6           0        2.517847   -0.035591    0.001849
      6          6           0        1.334083   -0.005526   -0.750270
      7          8           0        1.134440    0.023272    3.422379
      8          6           0        1.464845   -0.018427   -2.242380
      9          6           0        0.241736    0.041004   -3.082229
     10          6           0        0.352321    0.022469   -4.425692
     11          6           0       -0.713075    0.074391   -5.418689
     12          6           0       -0.377061    0.001569   -6.782028
     13          6           0       -1.349360    0.044514   -7.775545
     14          6           0       -2.697519    0.164540   -7.421996
     15          6           0       -3.059677    0.241389   -6.068609
     16          6           0       -2.080668    0.196319   -5.089832
     17          8           0       -3.701974    0.212812   -8.340840
     18          6           0        2.308273   -0.038726    4.236854
     19          6           0        1.895085   -0.078267    5.687587
     20          6           0        0.835819   -0.892259    6.107754
     21          6           0        0.490202   -0.957889    7.456388
     22          6           0        1.204143   -0.218471    8.402465
     23          6           0        2.260776    0.593317    7.990778
     24          6           0        2.599566    0.666374    6.638445
     25          1           0       -0.831890    0.055436   -0.584019
     26          1           0       -0.858540    0.069007    1.876507
     27          1           0        3.441434   -0.046108    1.935817
     28          1           0        3.457210   -0.064916   -0.539502
     29          1           0       -0.727906    0.098786   -2.601384
     30          1           0        0.668049   -0.090677   -7.064293
     31          1           0       -1.063334   -0.013997   -8.823405
     32          1           0       -4.109658    0.337137   -5.813540
     33          1           0       -2.378595    0.260721   -4.048142
     34          1           0       -3.325806    0.152379   -9.229163
     35          1           0        2.949549    0.831377    4.044535
     36          1           0        2.882194   -0.939924    3.974499
     37          1           0        0.277295   -1.460350    5.370791
     38          1           0       -0.336906   -1.587988    7.770494
     39          1           0        0.934716   -0.272172    9.453181
     40          1           0        2.816151    1.177724    8.718492
     41          1           0        3.416456    1.309682    6.320631
     42          8           0        2.580935   -0.076821   -2.757949
     43          1           0        1.367515   -0.057886   -4.812222
 ---------------------------------------------------------------------
                    Distance matrix (angstroms):
                    1          2          3          4          5
     1  C    0.000000
     2  C    1.387030   0.000000
     3  C    2.419368   1.403266   0.000000
     4  C    2.794967   2.425457   1.402997   0.000000
     5  C    2.406710   2.778694   2.411986   1.390828   0.000000
     6  C    1.407164   2.432747   2.819822   2.441701   1.402812
     7  O    3.621961   2.339141   1.360894   2.449358   3.690164
     8  C    2.574209   3.835535   4.315525   3.780700   2.479046
     9  C    3.032511   4.419337   5.253982   5.014797   3.833808
    10  C    4.379789   5.766292   6.559928   6.203724   4.929096
    11  C    5.429542   6.799420   7.747490   7.533645   6.311353
    12  C    6.747427   8.129174   9.003931   8.667633   7.375829
    13  C    7.860258   9.221254  10.188498   9.945406   8.686171
    14  C    7.888260   9.187147  10.290184  10.236864   9.074886
    15  C    6.804519   8.043808   9.223266   9.311301   8.248391
    16  C    5.496603   6.779616   7.908717   7.943197   6.864789
    17  O    9.125859  10.389575  11.540433  11.546257  10.409051
    18  C    4.819118   3.659846   2.401767   2.851045   4.240189
    19  C    6.011445   4.717912   3.672344   4.338307   5.719901
    20  C    6.271145   4.921985   4.161541   5.075968   6.391023
    21  C    7.583353   6.216462   5.529668   6.457014   7.780240
    22  C    8.528798   7.161697   6.338051   7.132018   8.504682
    23  C    8.343983   7.026411   6.031589   6.631772   8.017768
    24  C    7.166171   5.905391   4.802616   5.292353   6.674117
    25  H    1.084134   2.124203   3.388526   3.878727   3.401803
    26  H    2.160006   1.084845   2.143730   3.398925   3.863324
    27  H    3.878125   3.415387   2.170524   1.083292   2.143212
    28  H    3.381175   3.863080   3.401219   2.154591   1.084585
    29  H    2.684761   4.018167   5.082726   5.139587   4.162906
    30  H    7.034861   8.419992   9.153940   8.654188   7.304461
    31  H    8.849551  10.221918  11.140653  10.821056   9.524202
    32  H    7.149192   8.290723   9.552101   9.788079   8.825049
    33  H    4.714226   5.921616   7.129899   7.316274   6.361239
    34  H    9.800479  11.099546  12.200033  12.117958  10.926810
    35  H    5.046836   4.025438   2.716764   2.822760   4.157080
    36  H    4.983264   3.972409   2.667014   2.764467   4.090540
    37  H    5.627504   4.310790   3.749516   4.779151   5.989621
    38  H    8.001774   6.652039   6.136744   7.154512   8.420890
    39  H    9.546006   8.169773   7.397494   8.215664   9.585925
    40  H    9.249265   7.956575   6.924979   7.430861   8.805737
    41  H    7.291171   6.132389   4.934691   5.186952   6.522597
    42  O    3.663837   4.796967   5.000960   4.151538   2.760826
    43  H    4.923205   6.280436   6.882071   6.308174   4.949650
                    6          7          8          9         10
     6  C    0.000000
     7  O    4.177522   0.000000
     8  C    1.497885   5.674540   0.000000
     9  C    2.575543   6.565605   1.484882   0.000000
    10  C    3.804388   7.886947   2.450762   1.348134   0.000000
    11  C    5.098174   9.032187   3.852387   2.524247   1.457329
    12  C    6.269783  10.315766   4.899125   3.751397   2.466730
    13  C    7.520496  11.470101   6.208029   4.955685   3.757356
    14  C    7.797094  11.502362   6.647343   5.242905   4.277797
    15  C    6.902958  10.378683   5.931175   4.456226   3.793262
    16  C    5.525674   9.100803   4.552446   3.073785   2.527991
    17  O    9.111877  12.720069   7.996294   6.575360   5.639320
    18  C    5.081491   1.430069   6.533931   7.605650   8.880833
    19  C    6.462663   2.391664   7.941855   8.925103  10.230771
    20  C    6.933041   2.852825   8.419263   9.256333  10.584138
    21  C    8.304719   4.201303   9.792784  10.588766  11.923252
    22  C    9.156134   4.986437  10.649916  11.527869  12.858665
    23  C    8.810408   4.739605  10.282279  11.269120  12.575245
    24  C    7.526354   3.592110   8.979175  10.022073  11.308397
    25  H    2.173199   4.463039   2.833833   2.719179   4.020185
    26  H    3.422442   2.522653   4.729799   5.079415   6.417637
    27  H    3.414328   2.745342   4.622229   5.952012   7.072208
    28  H    2.134390   4.593424   2.621350   4.100726   4.974982
    29  H    2.772959   6.305534   2.225035   1.083861   2.121512
    30  H    6.349626  10.497657   4.887837   4.006984   2.659831
    31  H    8.421591  12.441496   7.049936   5.887897   4.620096
    32  H    7.442341  10.625501   6.629834   5.146104   4.683417
    33  H    4.973010   8.258722   4.255670   2.801320   2.767166
    34  H    9.676318  13.415364   8.473172   7.108063   6.051349
    35  H    5.128381   2.082003   6.515505   7.664705   8.896329
    36  H    5.058971   2.070562   6.442641   7.598135   8.825512
    37  H    6.379710   2.594637   7.838992   8.585388   9.908353
    38  H    8.826086   4.864885  10.294050  10.989542  12.321345
    39  H   10.214744   6.041336  11.710319  12.558455  13.894211
    40  H    9.656814   5.675361  11.108444  12.131643  13.422915
    41  H    7.487569   3.906701   8.882444  10.005107  11.248524
    42  O    2.364424   6.348136   1.230804   2.364507   2.785309
    43  H    4.062427   8.238299   2.571987   2.066406   1.089257
                   11         12         13         14         15
    11  C    0.000000
    12  C    1.406024   0.000000
    13  C    2.441418   1.390786   0.000000
    14  C    2.821238   2.412601   1.398905   0.000000
    15  C    2.440661   2.786200   2.424371   1.403111   0.000000
    16  C    1.411851   2.409093   2.787635   2.412572   1.385098
    17  O    4.182302   3.678256   2.425423   1.362181   2.361439
    18  C   10.117848  11.341446  12.557187  12.689683  11.623077
    19  C   11.409433  12.675185  13.849095  13.892881  12.761661
    20  C   11.670149  12.977538  14.085402  14.023389  12.834480
    21  C   12.972320  14.297035  15.375324  15.257383  14.034439
    22  C   13.956568  15.268185  16.380402  16.302860  15.093165
    23  C   13.745067  15.018127  16.183671  16.196362  15.036537
    24  C   12.517927  13.762680  14.958069  15.033527  13.916784
    25  H    4.836166   6.214908   7.210128   7.088752   5.922697
    26  H    7.296648   8.672174   9.664555   9.479089   8.246187
    27  H    8.447676   9.517563  10.829150  11.193739  10.315908
    28  H    6.420059   7.326335   8.687659   9.235912   8.551882
    29  H    2.817449   4.196466   5.211631   5.207879   4.180807
    30  H    2.154708   1.086479   2.143384   3.394132   3.872673
    31  H    3.423826   2.153702   1.087771   2.160181   3.411673
    32  H    3.429536   3.870769   3.399167   2.147337   1.084752
    33  H    2.164964   3.398150   3.872932   3.390259   2.132261
    34  H    4.620840   3.834881   2.455805   1.913307   3.172987
    35  H   10.175482  11.356469  12.602145  12.799038  11.778564
    36  H   10.108747  11.278831  12.527518  12.737077  11.728826
    37  H   10.942995  12.257912  13.331796  13.234243  12.037076
    38  H   13.298855  14.639132  15.664273  15.474353  14.222548
    39  H   14.966891  16.290417  17.382356  17.267178  16.035738
    40  H   14.612757  15.869659  17.049602  17.086324  15.939274
    41  H   12.505623  13.703343  14.933715  15.084822  14.020515
    42  O    4.237087   4.994907   6.374811   7.047955   6.548148
    43  H    2.171210   2.631960   4.021589   4.835793   4.611736
                   16         17         18         19         20
    16  C    0.000000
    17  O    3.632900   0.000000
    18  C   10.310438  13.942193   0.000000
    19  C   11.490638  15.106574   1.508945   0.000000
    20  C   11.622256  15.184684   2.529211   1.400417   0.000000
    21  C   12.858819  16.385888   3.809940   2.424064   1.393762
    22  C   13.892592  17.452629   4.313204   2.804928   2.419783
    23  C   13.787970  17.390254   3.807057   2.426818   2.789842
    24  C   12.636377  16.257125   2.519852   1.398182   2.412835
    25  H    4.677782   8.272268   5.754156   6.840125   6.961265
    26  H    7.073874  10.606601   3.951145   4.704090   4.658147
    27  H    8.939359  12.518187   2.564933   4.058079   4.991018
    28  H    7.172297  10.592070   4.912669   6.420050   7.193205
    29  H    2.834052   6.465249   7.483234   8.695888   8.903735
    30  H    3.396514   4.562760  11.419674  12.810785  13.197481
    31  H    3.875406   2.691976  13.488466  14.809634  15.077057
    32  H    2.158792   2.562988  11.930697  12.980964  12.964815
    33  H    1.085369   4.492314   9.523526  10.637841  10.714665
    34  H    4.322772   0.966578  14.598390  15.805705  15.925810
    35  H   10.447155  14.072061   1.097863   2.153826   3.419891
    36  H   10.396304  14.012411   1.100170   2.156736   2.956468
    37  H   10.850308  14.375079   2.726114   2.151222   1.085260
    38  H   13.100093  16.557223   4.678011   3.405810   2.150354
    39  H   14.859719  18.394600   5.399187   3.890965   3.403846
    40  H   14.683726  18.287642   4.671485   3.407677   3.875887
    41  H   12.714426  16.335052   2.718161   2.154464   3.399051
    42  O    5.219466   8.409965   7.000219   8.473339   9.072544
    43  H    3.468667   6.182568   9.097866  10.513074  10.964705
                   21         22         23         24         25
    21  C    0.000000
    22  C    1.396965   0.000000
    23  C    2.413865   1.394618   0.000000
    24  C    2.785081   2.417007   1.396038   0.000000
    25  H    8.211145   9.218316   9.131323   8.019484   0.000000
    26  H    5.831697   6.850214   6.883992   5.915352   2.460708
    27  H    6.325964   6.844905   6.202046   4.830226   4.961974
    28  H    8.575243   9.222726   8.638889   7.265897   4.291020
    29  H   10.186222  11.176679  11.016836   9.837106   2.020508
    30  H   14.547642  15.476574  15.154531  13.858893   6.653203
    31  H   16.380967  17.375669  17.150373  15.904356   8.242928
    32  H   14.104141  15.186836  15.205501  14.148287   6.178269
    33  H   11.919280  12.964693  12.906199  11.796177   3.799287
    34  H   17.152324  18.208028  18.108857  16.945654   8.998196
    35  H    4.570624   4.810424   4.012969   2.622610   6.027013
    36  H    4.224394   4.789910   4.343672   3.123568   5.963661
    37  H    2.155809   3.404755   3.875058   3.394531   6.244010
    38  H    1.086183   2.156338   3.399201   3.871246   8.528994
    39  H    2.157540   1.086038   2.155488   3.402254  10.196745
    40  H    3.400557   2.155877   1.086067   2.152902  10.055071
    41  H    3.872310   3.400531   2.153640   1.087272   8.203400
    42  O   10.463275  11.245909  10.774355   9.425757   4.048560
    43  H   12.332821  13.216673  12.850634  11.539509   4.767381
                   26         27         28         29         30
    26  H    0.000000
    27  H    4.301924   0.000000
    28  H    4.947801   2.475441   0.000000
    29  H    4.479895   6.163650   4.668335   0.000000
    30  H    9.071598   9.417836   7.095984   4.679973   0.000000
    31  H   10.702194  11.664254   9.437211   6.232077   2.469421
    32  H    8.353352  10.826745   9.232260   4.670226   4.957206
    33  H    6.119542   8.353122   6.817127   2.200933   4.301474
    34  H   11.376742  13.057248  11.025731   7.118948   4.549353
    35  H    4.447819   2.336369   4.698346   7.630767  11.378114
    36  H    4.405974   2.295186   4.633841   7.573241  11.290642
    37  H    3.979833   4.879642   6.854974   8.185164  12.516390
    38  H    6.144657   7.120161   9.261268  10.515414  14.943988
    39  H    7.793468   7.927515  10.308232  12.174336  16.520624
    40  H    7.845086   6.920508   9.362989  11.910669  15.978720
    41  H    6.290080   4.589704   6.996614   9.911829  13.735754
    42  O    5.773166   4.772090   2.385269   3.317195   4.712105
    43  H    7.050569   7.059555   4.756366   3.050105   2.358422
                   31         32         33         34         35
    31  H    0.000000
    32  H    4.296821   0.000000
    33  H    4.960697   2.473671   0.000000
    34  H    2.304583   3.509279   5.268010   0.000000
    35  H   13.505619  12.135004   9.705987  14.698033   0.000000
    36  H   13.424264  12.096387   9.668517  14.631100   1.773965
    37  H   14.330542  12.147658   9.936405  15.124216   3.761903
    38  H   16.684203  14.229046  12.135336  17.347932   5.526019
    39  H   18.387290  16.090051  13.912143  19.166697   5.876294
    40  H   18.005243  16.119969  13.813517  18.997192   4.688670
    41  H   15.848106  14.311756  11.924529  16.988041   2.372213
    42  O    7.076327   7.366956   5.135705   8.764630   6.872735
    43  H    4.690473   5.581944   3.836491   6.448321   9.040783
                   36         37         38         39         40
    36  H    0.000000
    37  H    3.000996   0.000000
    38  H    5.019180   2.480344   0.000000
    39  H    5.852736   4.302310   2.485926   0.000000
    40  H    5.195601   4.961081   4.299957   2.486316   0.000000
    41  H    3.294009   4.292971   4.958459   4.298158   2.475382
    42  O    6.794230   8.561386  11.029303  12.323145  11.547204
    43  H    8.959839  10.336791  12.789487  14.273575  13.664022
                   41         42         43
    41  H    0.000000
    42  O    9.221773   0.000000
    43  H   11.402141   2.385956   0.000000
 Stoichiometry    C22H18O3
 Framework group  C1[X(C22H18O3)]
 Deg. of freedom   123
 Full point group                 C1      NOp   1
 Largest Abelian subgroup         C1      NOp   1
 Largest concise Abelian subgroup C1      NOp   1
                         Standard orientation:                         
 ---------------------------------------------------------------------
 Center     Atomic      Atomic             Coordinates (Angstroms)
 Number     Number       Type             X           Y           Z
 ---------------------------------------------------------------------
      1          6           0        0.102213   -0.358687    0.051681
      2          6           0        1.435967   -0.736598    0.097890
      3          6           0        2.447931    0.233463    0.034123
      4          6           0        2.102832    1.588902   -0.075846
      5          6           0        0.760437    1.949652   -0.123157
      6          6           0       -0.265474    0.994934   -0.060698
      7          8           0        3.722048   -0.241242    0.091690
      8          6           0       -1.676420    1.494253   -0.120455
      9          6           0       -2.797576    0.524935   -0.029316
     10          6           0       -4.069651    0.967250   -0.089708
     11          6           0       -5.299257    0.188378   -0.017353
     12          6           0       -6.533067    0.850893   -0.142616
     13          6           0       -7.739636    0.161710   -0.083415
     14          6           0       -7.738226   -1.224223    0.106641
     15          6           0       -6.520682   -1.909321    0.236825
     16          6           0       -5.326658   -1.210067    0.174797
     17          8           0       -8.880694   -1.962922    0.174656
     18          6           0        4.806300    0.686657   -0.000498
     19          6           0        6.107009   -0.078006    0.018422
     20          6           0        6.259841   -1.248306   -0.735376
     21          6           0        7.479129   -1.923391   -0.748346
     22          6           0        8.562839   -1.432753   -0.015980
     23          6           0        8.417587   -0.267233    0.735967
     24          6           0        7.192888    0.402551    0.756559
     25          1           0       -0.650002   -1.137785    0.101917
     26          1           0        1.724306   -1.778848    0.184286
     27          1           0        2.864401    2.357932   -0.121943
     28          1           0        0.473125    2.991922   -0.209460
     29          1           0       -2.576866   -0.530030    0.085100
     30          1           0       -6.542098    1.927377   -0.289376
     31          1           0       -8.680920    0.697636   -0.183474
     32          1           0       -6.539248   -2.983529    0.386554
     33          1           0       -4.394426   -1.755658    0.281103
     34          1           0       -9.644894   -1.379878    0.073018
     35          1           0        4.768036    1.398607    0.834346
     36          1           0        4.710499    1.261879   -0.933405
     37          1           0        5.414945   -1.632407   -1.297877
     38          1           0        7.584857   -2.833422   -1.331835
     39          1           0        9.512782   -1.958992   -0.028644
     40          1           0        9.252490    0.116961    1.314649
     41          1           0        7.080801    1.304296    1.353594
     42          8           0       -1.893911    2.699474   -0.243006
     43          1           0       -4.187289    2.041510   -0.226118
 ---------------------------------------------------------------------
 Rotational constants (GHZ):      0.8377412      0.0500840      0.0476107
 Standard basis: 6-31G(d,p) (6D, 7F)
 There are   465 symmetry adapted basis functions of A   symmetry.
 Integral buffers will be    262144 words long.
 Raffenetti 2 integral format.
 Two-electron integral symmetry is turned on.
   465 basis functions,   826 primitive gaussians,   465 cartesian basis functions
    87 alpha electrons       87 beta electrons
       nuclear repulsion energy      1775.8906266379 Hartrees.
 NAtoms=   43 NActive=   43 NUniq=   43 SFac= 7.50D-01 NAtFMM=   80 NAOKFM=F Big=F
 One-electron integrals computed using PRISM.
 NBasis=   465 RedAO= T  NBF=   465
 NBsUse=   465 1.00D-06 NBFU=   465
 Initial guess read from the read-write file.
 B after Tr=     0.000000    0.000000    0.000000
         Rot=    1.000000    0.000000    0.000000    0.000000 Ang=   0.00 deg.
 Initial guess orbital symmetries:
       Occupied  (A) (A) (A) (A) (A) (A) (A) (A) (A) (A) (A) (A)
                 (A) (A) (A) (A) (A) (A) (A) (A) (A) (A) (A) (A)
                 (A) (A) (A) (A) (A) (A) (A) (A) (A) (A) (A) (A)
                 (A) (A) (A) (A) (A) (A) (A) (A) (A) (A) (A) (A)
                 (A) (A) (A) (A) (A) (A) (A) (A) (A) (A) (A) (A)
                 (A) (A) (A) (A) (A) (A) (A) (A) (A) (A) (A) (A)
                 (A) (A) (A) (A) (A) (A) (A) (A) (A) (A) (A) (A)
                 (A) (A) (A)
       Virtual   (A) (A) (A) (A) (A) (A) (A) (A) (A) (A) (A) (A)
                 (A) (A) (A) (A) (A) (A) (A) (A) (A) (A) (A) (A)
                 (A) (A) (A) (A) (A) (A) (A) (A) (A) (A) (A) (A)
                 (A) (A) (A) (A) (A) (A) (A) (A) (A) (A) (A) (A)
                 (A) (A) (A) (A) (A) (A) (A) (A) (A) (A) (A) (A)
                 (A) (A) (A) (A) (A) (A) (A) (A) (A) (A) (A) (A)
                 (A) (A) (A) (A) (A) (A) (A) (A) (A) (A) (A) (A)
                 (A) (A) (A) (A) (A) (A) (A) (A) (A) (A) (A) (A)
                 (A) (A) (A) (A) (A) (A) (A) (A) (A) (A) (A) (A)
                 (A) (A) (A) (A) (A) (A) (A) (A) (A) (A) (A) (A)
                 (A) (A) (A) (A) (A) (A) (A) (A) (A) (A) (A) (A)
                 (A) (A) (A) (A) (A) (A) (A) (A) (A) (A) (A) (A)
                 (A) (A) (A) (A) (A) (A) (A) (A) (A) (A) (A) (A)
                 (A) (A) (A) (A) (A) (A) (A) (A) (A) (A) (A) (A)
                 (A) (A) (A) (A) (A) (A) (A) (A) (A) (A) (A) (A)
                 (A) (A) (A) (A) (A) (A) (A) (A) (A) (A) (A) (A)
                 (A) (A) (A) (A) (A) (A) (A) (A) (A) (A) (A) (A)
                 (A) (A) (A) (A) (A) (A) (A) (A) (A) (A) (A) (A)
                 (A) (A) (A) (A) (A) (A) (A) (A) (A) (A) (A) (A)
                 (A) (A) (A) (A) (A) (A) (A) (A) (A) (A) (A) (A)
                 (A) (A) (A) (A) (A) (A) (A) (A) (A) (A) (A) (A)
                 (A) (A) (A) (A) (A) (A) (A) (A) (A) (A) (A) (A)
                 (A) (A) (A) (A) (A) (A) (A) (A) (A) (A) (A) (A)
                 (A) (A) (A) (A) (A) (A) (A) (A) (A) (A) (A) (A)
                 (A) (A) (A) (A) (A) (A) (A) (A) (A) (A) (A) (A)
                 (A) (A) (A) (A) (A) (A) (A) (A) (A) (A) (A) (A)
                 (A) (A) (A) (A) (A) (A) (A) (A) (A) (A) (A) (A)
                 (A) (A) (A) (A) (A) (A) (A) (A) (A) (A) (A) (A)
                 (A) (A) (A) (A) (A) (A) (A) (A) (A) (A) (A) (A)
                 (A) (A) (A) (A) (A) (A) (A) (A) (A) (A) (A) (A)
                 (A) (A) (A) (A) (A) (A) (A) (A) (A) (A) (A) (A)
                 (A) (A) (A) (A) (A) (A)
 Harris functional with IExCor=  402 diagonalized for initial guess.
 ExpMin= 1.61D-01 ExpMax= 5.48D+03 ExpMxC= 8.25D+02 IAcc=1 IRadAn=         1 AccDes= 0.00D+00
 HarFok:  IExCor=  402 AccDes= 0.00D+00 IRadAn=         1 IDoV= 1
 ScaDFX=  1.000000  1.000000  1.000000  1.000000
 FoFCou: FMM=F IPFlag=           0 FMFlag=      100000 FMFlg1=           0
         NFxFlg=           0 DoJE=T BraDBF=F KetDBF=T FulRan=T
         Omega=  0.000000  0.000000  1.000000  0.000000  0.000000 ICntrl=     500 IOpCl=  0
         NMat0=    1 NMatS0=    1 NMatT0=    0 NMatD0=    1 NMtDS0=    0 NMtDT0=    0
         I1Cent=           4 NGrid=           0.
 Petite list used in FoFCou.
 Requested convergence on RMS density matrix=1.00D-08 within 128 cycles.
 Requested convergence on MAX density matrix=1.00D-06.
 Requested convergence on             energy=1.00D-06.
 No special actions if energy rises.
 Integral accuracy reduced to 1.0D-05 until final iterations.
 Initial convergence to 1.0D-05 achieved.  Increase integral accuracy.
 SCF Done:  E(RB3LYP) =  -1074.86447997     A.U. after   11 cycles
             Convg  =    0.5942D-08             -V/T =  2.0095
 Calling FoFJK, ICntrl=      2127 FMM=F ISym2X=0 I1Cent= 0 IOpClX= 0 NMat=1 NMatS=1 NMatT=0.
 ***** Axes restored to original set *****
 -------------------------------------------------------------------
 Center     Atomic                   Forces (Hartrees/Bohr)
 Number     Number              X              Y              Z
 -------------------------------------------------------------------
      1        6          -0.000091898   -0.000007644    0.000138893
      2        6          -0.000157382   -0.000017792   -0.000089142
      3        6          -0.000033374   -0.000012477   -0.000015382
      4        6          -0.000028503    0.000009666   -0.000119702
      5        6          -0.000189073    0.000055688   -0.000058753
      6        6           0.000585701    0.000018084    0.000003993
      7        8           0.000019035    0.000008072    0.000013246
      8        6          -0.003000300   -0.000118386    0.000625710
      9        6           0.001260135    0.000203852    0.001946354
     10        6          -0.000246623   -0.001516977   -0.000895219
     11        6          -0.000289903    0.000165599    0.000306532
     12        6          -0.000082251    0.000109305   -0.000084533
     13        6          -0.000158791    0.000004331   -0.000128788
     14        6           0.000202579   -0.000065460   -0.000049704
     15        6           0.000137006   -0.000044134   -0.000073071
     16        6           0.000342706    0.000124461   -0.000069678
     17        8          -0.000103786    0.000050545   -0.000094170
     18        6          -0.000013826   -0.000004168   -0.000006924
     19        6           0.000000988   -0.000005652    0.000010292
     20        6          -0.000007040    0.000006369   -0.000004964
     21        6           0.000007712    0.000000488    0.000008951
     22        6          -0.000009419   -0.000014012   -0.000002622
     23        6           0.000005559    0.000002863   -0.000008935
     24        6           0.000002887   -0.000001863    0.000008301
     25        1          -0.000008546   -0.000011275   -0.000149866
     26        1           0.000000666   -0.000008925   -0.000014896
     27        1           0.000022560    0.000004586   -0.000051634
     28        1           0.000031136   -0.000001082    0.000045712
     29        1           0.000082068    0.000394687   -0.000056506
     30        1          -0.000019081   -0.000008904    0.000024766
     31        1          -0.000071149   -0.000016674   -0.000046373
     32        1          -0.000003056   -0.000040544   -0.000011100
     33        1          -0.000180333   -0.000022260   -0.000123249
     34        1          -0.000005496   -0.000006889    0.000029644
     35        1          -0.000000344    0.000005710    0.000009024
     36        1           0.000016443    0.000008332    0.000009605
     37        1           0.000003461   -0.000005731    0.000000602
     38        1           0.000002017   -0.000008814   -0.000001270
     39        1          -0.000001500   -0.000005139   -0.000000635
     40        1          -0.000003269   -0.000001354    0.000000894
     41        1          -0.000001961    0.000000725    0.000001619
     42        8           0.002043069   -0.000084616   -0.000868420
     43        1          -0.000058821    0.000857406   -0.000158600
 -------------------------------------------------------------------
 Cartesian Forces:  Max     0.003000300 RMS     0.000439475

 GradGradGradGradGradGradGradGradGradGradGradGradGradGradGradGradGradGrad
 Berny optimization.
 Using GEDIIS/GDIIS optimizer.
 Internal  Forces:  Max     0.002220403 RMS     0.000237415
 Search for a local minimum.
 Step number   6 out of a maximum of  227
 All quantities printed in internal units (Hartrees-Bohrs-Radians)
 Mixed Optimization -- En-DIIS/RFO-DIIS
 Swaping is turned off.
 Update second derivatives using D2CorX and points    1    2    3    4    5
                                                      6
 DE= -6.81D-06 DEPred=-4.93D-05 R= 1.38D-01
 Trust test= 1.38D-01 RLast= 8.73D-02 DXMaxT set to 6.80D-01
     Eigenvalues ---    0.00529   0.00651   0.00989   0.01294   0.01307
     Eigenvalues ---    0.01516   0.01636   0.01777   0.01857   0.01914
     Eigenvalues ---    0.01989   0.02019   0.02058   0.02088   0.02090
     Eigenvalues ---    0.02095   0.02098   0.02103   0.02120   0.02121
     Eigenvalues ---    0.02125   0.02129   0.02131   0.02139   0.02143
     Eigenvalues ---    0.02143   0.02147   0.02148   0.02151   0.02152
     Eigenvalues ---    0.02156   0.02173   0.02184   0.02194   0.02203
     Eigenvalues ---    0.02210   0.02724   0.02875   0.06389   0.07338
     Eigenvalues ---    0.11387   0.13891   0.14237   0.15825   0.15998
     Eigenvalues ---    0.15999   0.16000   0.16000   0.16000   0.16000
     Eigenvalues ---    0.16000   0.16000   0.16000   0.16000   0.16001
     Eigenvalues ---    0.16005   0.16025   0.16199   0.19728   0.21021
     Eigenvalues ---    0.22000   0.22000   0.22003   0.22019   0.22129
     Eigenvalues ---    0.22962   0.22969   0.23471   0.23900   0.24012
     Eigenvalues ---    0.24115   0.24973   0.24983   0.25000   0.25002
     Eigenvalues ---    0.25006   0.27250   0.29873   0.31466   0.32555
     Eigenvalues ---    0.33648   0.33907   0.35020   0.35131   0.35205
     Eigenvalues ---    0.35261   0.35274   0.35277   0.35363   0.35388
     Eigenvalues ---    0.35407   0.35435   0.35460   0.35477   0.35523
     Eigenvalues ---    0.35623   0.36616   0.37283   0.39627   0.40979
     Eigenvalues ---    0.41172   0.41623   0.41766   0.41956   0.41976
     Eigenvalues ---    0.42190   0.44660   0.44796   0.45157   0.45425
     Eigenvalues ---    0.45836   0.46018   0.46031   0.46356   0.46551
     Eigenvalues ---    0.46666   0.47733   0.48046   0.52558   0.52789
     Eigenvalues ---    0.54078   0.58210   0.954541000.000001000.00000
     Eigenvalues --- 1000.000001000.000001000.000001000.000001000.00000
     Eigenvalues --- 1000.000001000.000001000.000001000.000001000.00000
     Eigenvalues --- 1000.000001000.000001000.000001000.000001000.00000
     Eigenvalues --- 1000.000001000.000001000.000001000.000001000.00000
     Eigenvalues --- 1000.000001000.000001000.000001000.000001000.00000
     Eigenvalues --- 1000.000001000.000001000.000001000.000001000.00000
     Eigenvalues --- 1000.000001000.000001000.000001000.000001000.00000
     Eigenvalues --- 1000.000001000.000001000.000001000.000001000.00000
     Eigenvalues --- 1000.000001000.000001000.000001000.000001000.00000
     Eigenvalues --- 1000.000001000.000001000.000001000.000001000.00000
     Eigenvalues --- 1000.000001000.000001000.000001000.000001000.00000
     Eigenvalues --- 1000.000001000.000001000.000001000.000001000.00000
     Eigenvalues --- 1000.000001000.000001000.000001000.000001000.00000
     Eigenvalues --- 1000.000001000.000001000.000001000.000001000.00000
     Eigenvalues --- 1000.000001000.000001000.000001000.000001000.00000
     Eigenvalues --- 1000.000001000.000001000.000001000.000001000.00000
     Eigenvalues --- 1000.000001000.000001000.000001000.000001000.00000
     Eigenvalues --- 1000.000001000.000001000.000001000.000001000.00000
     Eigenvalues --- 1000.000001000.00000
 En-DIIS/RFO-DIIS IScMMF=        0 using points:     6    5    4
 RFO step:  Lambda=-2.08317093D-05.
 DIIS coeffs:      0.53421      0.45995      0.00584
 Iteration  1 RMS(Cart)=  0.00579489 RMS(Int)=  0.00001682
 Iteration  2 RMS(Cart)=  0.00005715 RMS(Int)=  0.00000206
 Iteration  3 RMS(Cart)=  0.00000000 RMS(Int)=  0.00000206
 Variable       Old X    -DE/DX   Delta X   Delta X   Delta X     New X
                                  (DIIS)     (GDIIS)  (Total)
    R1        2.62111  -0.00014  -0.00025  -0.00004  -0.00028   2.62082
    R2        2.65915   0.00006   0.00039  -0.00015   0.00025   2.65940
    R3        2.04872   0.00008  -0.00007   0.00025   0.00018   2.04890
    R4        2.65179   0.00006   0.00028  -0.00011   0.00017   2.65196
    R5        2.05006  -0.00001  -0.00004   0.00002  -0.00001   2.05005
    R6        2.65128   0.00012  -0.00015   0.00029   0.00014   2.65142
    R7        2.57172   0.00003   0.00002   0.00004   0.00006   2.57178
    R8        2.62828  -0.00011   0.00005  -0.00016  -0.00011   2.62817
    R9        2.04712  -0.00001   0.00000  -0.00001  -0.00001   2.04711
   R10        2.65093  -0.00029  -0.00057  -0.00001  -0.00057   2.65036
   R11        2.04957   0.00000   0.00001  -0.00003  -0.00002   2.04955
   R12        2.83059  -0.00029   0.00001  -0.00067  -0.00066   2.82994
   R13        2.70244   0.00002   0.00006  -0.00001   0.00004   2.70248
   R14        2.80602  -0.00094  -0.00248  -0.00063  -0.00311   2.80291
   R15        2.32588   0.00222   0.00223   0.00007   0.00231   2.32819
   R16        2.54760   0.00133   0.00164   0.00069   0.00232   2.54993
   R17        2.04820  -0.00008   0.00028  -0.00042  -0.00014   2.04806
   R18        2.75395   0.00040  -0.00089   0.00177   0.00088   2.75483
   R19        2.05840  -0.00006   0.00053  -0.00074  -0.00021   2.05819
   R20        2.65700   0.00031   0.00080  -0.00009   0.00071   2.65771
   R21        2.66801  -0.00018  -0.00045   0.00006  -0.00038   2.66763
   R22        2.62821   0.00018  -0.00026   0.00043   0.00017   2.62838
   R23        2.05315  -0.00002   0.00004  -0.00011  -0.00006   2.05309
   R24        2.64355  -0.00028   0.00020  -0.00058  -0.00038   2.64317
   R25        2.05559   0.00003  -0.00002   0.00007   0.00005   2.05564
   R26        2.65150  -0.00004  -0.00026   0.00010  -0.00016   2.65133
   R27        2.57415   0.00013  -0.00005   0.00018   0.00013   2.57428
   R28        2.61746   0.00009   0.00024  -0.00003   0.00020   2.61766
   R29        2.04988   0.00000   0.00003  -0.00004  -0.00001   2.04988
   R30        2.05105  -0.00007   0.00014  -0.00030  -0.00016   2.05089
   R31        1.82657  -0.00003  -0.00001  -0.00003  -0.00004   1.82653
   R32        2.85149   0.00001  -0.00002   0.00004   0.00002   2.85151
   R33        2.07466   0.00000  -0.00001   0.00002   0.00000   2.07466
   R34        2.07902   0.00000  -0.00001   0.00001   0.00000   2.07902
   R35        2.64640   0.00000   0.00002  -0.00001   0.00001   2.64641
   R36        2.64218   0.00000  -0.00001   0.00001   0.00000   2.64218
   R37        2.63383   0.00000  -0.00001   0.00001   0.00000   2.63383
   R38        2.05084   0.00000   0.00001  -0.00001   0.00000   2.05085
   R39        2.63988  -0.00001   0.00001  -0.00002  -0.00001   2.63987
   R40        2.05259   0.00000   0.00000   0.00000   0.00000   2.05259
   R41        2.63545   0.00001   0.00000   0.00001   0.00001   2.63546
   R42        2.05231   0.00000   0.00000   0.00000   0.00000   2.05231
   R43        2.63813  -0.00001   0.00000  -0.00001  -0.00001   2.63812
   R44        2.05237   0.00000   0.00000   0.00000   0.00000   2.05237
   R45        2.05465   0.00000   0.00000   0.00000   0.00000   2.05465
    A1        2.11299   0.00005  -0.00001   0.00028   0.00027   2.11326
    A2        2.05991   0.00011   0.00026   0.00033   0.00059   2.06051
    A3        2.11028  -0.00015  -0.00025  -0.00062  -0.00086   2.10942
    A4        2.09854  -0.00015  -0.00022  -0.00027  -0.00050   2.09805
    A5        2.11764   0.00006   0.00018   0.00006   0.00024   2.11788
    A6        2.06700   0.00009   0.00005   0.00021   0.00026   2.06726
    A7        2.08752   0.00001   0.00006   0.00000   0.00007   2.08759
    A8        2.01763   0.00002   0.00000   0.00002   0.00002   2.01765
    A9        2.17803  -0.00003  -0.00006  -0.00003  -0.00009   2.17794
   A10        2.08364   0.00007   0.00015   0.00017   0.00033   2.08397
   A11        2.11326   0.00002   0.00016  -0.00001   0.00015   2.11342
   A12        2.08628  -0.00009  -0.00031  -0.00017  -0.00048   2.08580
   A13        2.12683  -0.00012  -0.00021  -0.00023  -0.00044   2.12638
   A14        2.10325   0.00000   0.00021  -0.00033  -0.00011   2.10313
   A15        2.05311   0.00012   0.00000   0.00055   0.00055   2.05367
   A16        2.05685   0.00014   0.00023   0.00004   0.00027   2.05712
   A17        2.17728  -0.00063  -0.00039  -0.00163  -0.00202   2.17526
   A18        2.04905   0.00048   0.00016   0.00159   0.00175   2.05081
   A19        2.07234   0.00003   0.00003   0.00002   0.00004   2.07238
   A20        2.08423  -0.00054  -0.00024  -0.00084  -0.00108   2.08314
   A21        2.09075   0.00019  -0.00119   0.00176   0.00057   2.09132
   A22        2.10821   0.00035   0.00143  -0.00091   0.00051   2.10872
   A23        2.08923   0.00064   0.00299  -0.00061   0.00238   2.09161
   A24        2.08072  -0.00030  -0.00005  -0.00044  -0.00048   2.08024
   A25        2.11323  -0.00034  -0.00294   0.00105  -0.00190   2.11133
   A26        2.23771   0.00054   0.00214  -0.00074   0.00142   2.23913
   A27        2.01650  -0.00008   0.00010   0.00011   0.00022   2.01672
   A28        2.02883  -0.00045  -0.00221   0.00070  -0.00149   2.02734
   A29        2.07618  -0.00027  -0.00048  -0.00060  -0.00108   2.07510
   A30        2.15617   0.00057   0.00105   0.00091   0.00197   2.15813
   A31        2.05084  -0.00029  -0.00057  -0.00032  -0.00088   2.04996
   A32        2.12233   0.00025   0.00055   0.00036   0.00091   2.12325
   A33        2.07852  -0.00014  -0.00021  -0.00044  -0.00065   2.07787
   A34        2.08233  -0.00010  -0.00034   0.00008  -0.00026   2.08207
   A35        2.08961  -0.00010  -0.00023  -0.00015  -0.00038   2.08922
   A36        2.09747   0.00013   0.00024   0.00037   0.00061   2.09808
   A37        2.09611  -0.00003  -0.00001  -0.00022  -0.00022   2.09589
   A38        2.09119  -0.00009  -0.00025  -0.00010  -0.00035   2.09084
   A39        2.14504   0.00008   0.00018   0.00006   0.00024   2.14528
   A40        2.04695   0.00001   0.00006   0.00005   0.00011   2.04706
   A41        2.09138   0.00023   0.00044   0.00029   0.00073   2.09211
   A42        2.07314  -0.00013   0.00002  -0.00037  -0.00036   2.07278
   A43        2.11867  -0.00010  -0.00046   0.00008  -0.00037   2.11829
   A44        2.12101   0.00001   0.00004  -0.00007  -0.00003   2.12099
   A45        2.08813   0.00021   0.00075   0.00045   0.00120   2.08933
   A46        2.07403  -0.00021  -0.00080  -0.00037  -0.00117   2.07287
   A47        1.90788  -0.00001   0.00005  -0.00008  -0.00003   1.90785
   A48        1.90068   0.00002  -0.00001   0.00007   0.00006   1.90075
   A49        1.92338   0.00000   0.00002   0.00004   0.00006   1.92344
   A50        1.90487   0.00000  -0.00001   0.00006   0.00005   1.90491
   A51        1.92744  -0.00001   0.00000  -0.00007  -0.00006   1.92738
   A52        1.92906  -0.00001   0.00000  -0.00005  -0.00005   1.92901
   A53        1.87834   0.00000   0.00000  -0.00005  -0.00005   1.87829
   A54        2.10692   0.00001  -0.00004   0.00004   0.00001   2.10693
   A55        2.09660  -0.00001   0.00004  -0.00005   0.00000   2.09660
   A56        2.07903   0.00000  -0.00001   0.00000   0.00000   2.07902
   A57        2.10047   0.00000   0.00000   0.00000   0.00000   2.10047
   A58        2.08265   0.00000   0.00002  -0.00001   0.00001   2.08266
   A59        2.09996   0.00000  -0.00002   0.00001  -0.00001   2.09995
   A60        2.09862   0.00000  -0.00001   0.00001   0.00000   2.09862
   A61        2.08974   0.00000   0.00001  -0.00001   0.00000   2.08974
   A62        2.09482   0.00000   0.00000   0.00000   0.00000   2.09482
   A63        2.08908   0.00000   0.00001  -0.00001   0.00000   2.08908
   A64        2.09700   0.00000  -0.00001   0.00000   0.00000   2.09699
   A65        2.09710   0.00000   0.00000   0.00000   0.00000   2.09710
   A66        2.09472   0.00000  -0.00001   0.00001   0.00000   2.09472
   A67        2.09770   0.00000   0.00001   0.00000   0.00000   2.09770
   A68        2.09072   0.00000   0.00000   0.00000   0.00000   2.09072
   A69        2.10439   0.00000   0.00001   0.00000   0.00000   2.10439
   A70        2.08850   0.00000  -0.00002   0.00002  -0.00001   2.08849
   A71        2.09030   0.00000   0.00002  -0.00001   0.00000   2.09030
    D1        0.00115   0.00001   0.00008   0.00006   0.00014   0.00129
    D2       -3.14138   0.00001  -0.00002   0.00014   0.00012  -3.14126
    D3        3.13979   0.00000   0.00038  -0.00046  -0.00008   3.13972
    D4       -0.00274  -0.00001   0.00028  -0.00038  -0.00010  -0.00284
    D5       -0.00106  -0.00001  -0.00027   0.00022  -0.00005  -0.00111
    D6        3.13922  -0.00001   0.00003  -0.00022  -0.00019   3.13903
    D7       -3.13962   0.00001  -0.00058   0.00076   0.00017  -3.13944
    D8        0.00066   0.00000  -0.00028   0.00031   0.00003   0.00069
    D9        0.00072   0.00000   0.00009  -0.00017  -0.00008   0.00064
   D10        3.13795  -0.00001  -0.00002  -0.00005  -0.00007   3.13788
   D11       -3.13996   0.00000   0.00018  -0.00025  -0.00006  -3.14002
   D12       -0.00273   0.00000   0.00008  -0.00013  -0.00005  -0.00278
   D13       -0.00264   0.00000  -0.00005  -0.00001  -0.00006  -0.00270
   D14        3.13629   0.00000  -0.00003   0.00010   0.00007   3.13636
   D15       -3.13944   0.00000   0.00007  -0.00014  -0.00008  -3.13952
   D16       -0.00051   0.00000   0.00009  -0.00003   0.00005  -0.00046
   D17        3.11542   0.00000   0.00019  -0.00032  -0.00013   3.11529
   D18       -0.03079  -0.00001   0.00008  -0.00020  -0.00012  -0.03091
   D19        0.00277   0.00000  -0.00016   0.00031   0.00016   0.00292
   D20       -3.14007   0.00001  -0.00004   0.00020   0.00016  -3.13992
   D21       -3.13620   0.00000  -0.00018   0.00020   0.00002  -3.13617
   D22        0.00415   0.00000  -0.00007   0.00009   0.00002   0.00417
   D23       -0.00092   0.00000   0.00031  -0.00041  -0.00010  -0.00102
   D24       -3.14129   0.00001   0.00003   0.00000   0.00003  -3.14126
   D25       -3.14130   0.00000   0.00020  -0.00030  -0.00010  -3.14140
   D26        0.00151   0.00000  -0.00008   0.00011   0.00003   0.00155
   D27        0.02353   0.00007  -0.00221   0.00332   0.00110   0.02464
   D28       -3.11913   0.00003  -0.00382   0.00594   0.00212  -3.11701
   D29       -3.11937   0.00006  -0.00191   0.00288   0.00096  -3.11841
   D30        0.02115   0.00003  -0.00352   0.00549   0.00198   0.02313
   D31       -3.09314   0.00000  -0.00028   0.00028  -0.00001  -3.09314
   D32        1.07332   0.00000  -0.00029   0.00029   0.00000   1.07332
   D33       -0.98580   0.00000  -0.00029   0.00029   0.00000  -0.98581
   D34       -3.13538  -0.00002  -0.00172   0.00199   0.00027  -3.13511
   D35        0.00625   0.00004  -0.00231   0.00385   0.00154   0.00779
   D36        0.00730   0.00002  -0.00010  -0.00066  -0.00075   0.00654
   D37       -3.13426   0.00008  -0.00069   0.00120   0.00052  -3.13374
   D38       -3.13935   0.00003   0.00035   0.00225   0.00259  -3.13675
   D39        0.02131  -0.00049  -0.01492  -0.00222  -0.01714   0.00418
   D40        0.00221  -0.00003   0.00094   0.00036   0.00130   0.00351
   D41       -3.12032  -0.00055  -0.01432  -0.00412  -0.01843  -3.13875
   D42       -3.10815  -0.00027   0.00685  -0.01453  -0.00768  -3.11583
   D43        0.03454  -0.00026   0.00681  -0.01427  -0.00747   0.02708
   D44        0.01427   0.00026   0.02219  -0.01003   0.01217   0.02643
   D45       -3.12623   0.00027   0.02215  -0.00977   0.01238  -3.11385
   D46        3.14033  -0.00001  -0.00207   0.00130  -0.00077   3.13956
   D47       -0.00104   0.00001  -0.00097   0.00119   0.00022  -0.00082
   D48       -0.00229  -0.00003  -0.00202   0.00106  -0.00097  -0.00326
   D49        3.13953   0.00000  -0.00092   0.00094   0.00002   3.13955
   D50       -3.14129   0.00002   0.00181  -0.00094   0.00087  -3.14043
   D51        0.00464  -0.00002   0.00300  -0.00303  -0.00003   0.00462
   D52        0.00138   0.00004   0.00176  -0.00068   0.00108   0.00246
   D53       -3.13587  -0.00001   0.00295  -0.00277   0.00018  -3.13569
   D54        0.00137   0.00001   0.00102  -0.00055   0.00047   0.00184
   D55       -3.14122   0.00002   0.00072  -0.00007   0.00066  -3.14057
   D56       -3.14045  -0.00001  -0.00009  -0.00043  -0.00052  -3.14097
   D57        0.00014  -0.00001  -0.00038   0.00004  -0.00033  -0.00019
   D58        0.00053   0.00000   0.00033  -0.00037  -0.00004   0.00049
   D59        3.14146  -0.00002  -0.00053   0.00003  -0.00050   3.14096
   D60       -3.14007  -0.00001   0.00062  -0.00084  -0.00023  -3.14029
   D61        0.00087  -0.00002  -0.00024  -0.00045  -0.00069   0.00018
   D62       -0.00141   0.00001  -0.00058   0.00073   0.00015  -0.00126
   D63        3.13846   0.00001  -0.00144   0.00158   0.00015   3.13861
   D64        3.14080   0.00002   0.00023   0.00036   0.00058   3.14138
   D65       -0.00251   0.00003  -0.00063   0.00121   0.00058  -0.00193
   D66       -0.00060   0.00001   0.00014   0.00020   0.00034  -0.00026
   D67        3.14036   0.00000  -0.00070   0.00059  -0.00011   3.14025
   D68        0.00044  -0.00003  -0.00049  -0.00020  -0.00069  -0.00025
   D69        3.13772   0.00001  -0.00167   0.00187   0.00020   3.13793
   D70       -3.13939  -0.00003   0.00038  -0.00107  -0.00069  -3.14008
   D71       -0.00211   0.00001  -0.00079   0.00100   0.00021  -0.00190
   D72        0.75871  -0.00001   0.00098  -0.00139  -0.00041   0.75831
   D73       -2.42165  -0.00001   0.00100  -0.00145  -0.00044  -2.42210
   D74        2.87296   0.00000   0.00100  -0.00134  -0.00034   2.87262
   D75       -0.30741   0.00000   0.00102  -0.00139  -0.00037  -0.30778
   D76       -1.33369  -0.00001   0.00100  -0.00147  -0.00047  -1.33417
   D77        1.76912  -0.00002   0.00102  -0.00153  -0.00051   1.76862
   D78        3.10306   0.00000   0.00001  -0.00006  -0.00005   3.10301
   D79       -0.05408   0.00000   0.00004  -0.00003   0.00001  -0.05406
   D80       -0.00014   0.00000  -0.00001   0.00000  -0.00001  -0.00015
   D81        3.12591   0.00000   0.00002   0.00003   0.00005   3.12596
   D82       -3.09459   0.00000   0.00000   0.00004   0.00004  -3.09455
   D83        0.04988   0.00000  -0.00007   0.00004  -0.00003   0.04986
   D84        0.00885   0.00000   0.00002  -0.00001   0.00001   0.00885
   D85       -3.12987   0.00000  -0.00005  -0.00001  -0.00006  -3.12993
   D86       -0.00764   0.00000   0.00000   0.00001   0.00002  -0.00762
   D87        3.13529   0.00000   0.00002   0.00001   0.00003   3.13533
   D88       -3.13353   0.00000  -0.00003  -0.00002  -0.00005  -3.13358
   D89        0.00940   0.00000  -0.00001  -0.00002  -0.00003   0.00937
   D90        0.00672   0.00000   0.00000  -0.00001  -0.00001   0.00671
   D91       -3.13960   0.00000   0.00001  -0.00001   0.00000  -3.13960
   D92       -3.13621   0.00000  -0.00002  -0.00002  -0.00003  -3.13624
   D93        0.00065   0.00000  -0.00001  -0.00001  -0.00002   0.00063
   D94        0.00194   0.00000   0.00000   0.00000   0.00001   0.00195
   D95        3.13304   0.00000   0.00002   0.00002   0.00004   3.13308
   D96       -3.13492   0.00000   0.00000   0.00000   0.00000  -3.13492
   D97       -0.00382   0.00000   0.00001   0.00001   0.00003  -0.00379
   D98       -0.00979   0.00000  -0.00001   0.00001  -0.00001  -0.00980
   D99        3.12892   0.00000   0.00005   0.00001   0.00007   3.12898
   D100      -3.14093   0.00000  -0.00003  -0.00001  -0.00003  -3.14097
   D101      -0.00222   0.00000   0.00004   0.00000   0.00004  -0.00219
         Item               Value     Threshold  Converged?
 Maximum Force            0.002220     0.000450     NO 
 RMS     Force            0.000237     0.000300     YES
 Maximum Displacement     0.022110     0.001800     NO 
 RMS     Displacement     0.005823     0.001200     NO 
 Predicted change in Energy=-2.623188D-05
 GradGradGradGradGradGradGradGradGradGradGradGradGradGradGradGradGradGrad

                          Input orientation:                          
 ---------------------------------------------------------------------
 Center     Atomic      Atomic             Coordinates (Angstroms)
 Number     Number       Type             X           Y           Z
 ---------------------------------------------------------------------
      1          6           0        0.118645    0.029454   -0.055608
      2          6           0        0.084035    0.037170    1.330818
      3          6           0        1.278343    0.007655    2.067137
      4          6           0        2.507997   -0.028937    1.392440
      5          6           0        2.523755   -0.038664    0.001794
      6          6           0        1.341157   -0.009379   -0.751621
      7          8           0        1.135398    0.022770    3.420452
      8          6           0        1.471084   -0.023534   -2.243445
      9          6           0        0.248035    0.036332   -3.080438
     10          6           0        0.353326    0.016591   -4.425542
     11          6           0       -0.714739    0.071744   -5.416175
     12          6           0       -0.380141    0.006077   -6.780613
     13          6           0       -1.352923    0.051272   -7.773684
     14          6           0       -2.700877    0.166995   -7.418714
     15          6           0       -3.061730    0.237187   -6.064706
     16          6           0       -2.082212    0.190074   -5.086380
     17          8           0       -3.706314    0.217766   -8.336453
     18          6           0        2.308208   -0.038459    4.236495
     19          6           0        1.893251   -0.076880    5.686763
     20          6           0        0.833239   -0.890274    6.106217
     21          6           0        0.486015   -0.954913    7.454487
     22          6           0        1.199053   -0.215084    8.400914
     23          6           0        2.256422    0.596117    7.989939
     24          6           0        2.596829    0.668179    6.637963
     25          1           0       -0.824810    0.051206   -0.589436
     26          1           0       -0.855879    0.066747    1.871705
     27          1           0        3.444403   -0.047361    1.936784
     28          1           0        3.464067   -0.068372   -0.537867
     29          1           0       -0.720398    0.096767   -2.597654
     30          1           0        0.664919   -0.083297   -7.063859
     31          1           0       -1.067772   -0.002297   -8.822076
     32          1           0       -4.111730    0.329545   -5.808487
     33          1           0       -2.381129    0.249255   -4.044751
     34          1           0       -3.330850    0.162017   -9.225357
     35          1           0        2.949686    0.831535    4.044345
     36          1           0        2.882590   -0.939798    3.975633
     37          1           0        0.275440   -1.458727    5.368983
     38          1           0       -0.341636   -1.584580    7.768036
     39          1           0        0.928367   -0.268015    9.451345
     40          1           0        2.811131    1.180815    8.717927
     41          1           0        3.414327    1.310982    6.320694
     42          8           0        2.587606   -0.084444   -2.760701
     43          1           0        1.367846   -0.048348   -4.816402
 ---------------------------------------------------------------------
                    Distance matrix (angstroms):
                    1          2          3          4          5
     1  C    0.000000
     2  C    1.386879   0.000000
     3  C    2.418972   1.403357   0.000000
     4  C    2.794505   2.425646   1.403069   0.000000
     5  C    2.406759   2.779261   2.412227   1.390769   0.000000
     6  C    1.407294   2.432915   2.819510   2.441085   1.402509
     7  O    3.621716   2.339261   1.360927   2.449395   3.690330
     8  C    2.572650   3.834442   4.315002   3.780856   2.479807
     9  C    3.027604   4.414303   5.249751   5.011818   3.832060
    10  C    4.376249   5.762692   6.558248   6.204320   4.931036
    11  C    5.425126   6.794199   7.744446   7.533485   6.313036
    12  C    6.743517   8.124761   9.001847   8.668412   7.378053
    13  C    7.857142   9.217212  10.186620   9.946404   8.688773
    14  C    7.885680   9.182968  10.287904  10.237539   9.077611
    15  C    6.801999   8.039254   9.220401   9.311375   8.250828
    16  C    5.493472   6.774691   7.905658   7.943117   6.867079
    17  O    9.123495  10.385349  11.538008  11.546856  10.411814
    18  C    4.818812   3.660003   2.401845   2.851080   4.240183
    19  C    6.011269   4.718106   3.672458   4.338366   5.719953
    20  C    6.270936   4.921981   4.161558   5.076063   6.391171
    21  C    7.583237   6.216522   5.529726   6.457110   7.780395
    22  C    8.528766   7.161924   6.338188   7.132089   8.504774
    23  C    8.343982   7.026776   6.031791   6.631816   8.017785
    24  C    7.166119   5.905768   4.802827   5.292388   6.674107
    25  H    1.084229   2.124517   3.388589   3.878384   3.401547
    26  H    2.160006   1.084837   2.143966   3.399193   3.863885
    27  H    3.877653   3.415613   2.170675   1.083285   2.142861
    28  H    3.381419   3.863643   3.401355   2.154462   1.084575
    29  H    2.677783   4.010431   5.075745   5.134120   4.159327
    30  H    7.030413   8.415612   9.152030   8.654992   7.306211
    31  H    8.846443  10.218095  11.139090  10.822346   9.526861
    32  H    7.147149   8.286109   9.548925   9.787883   8.827492
    33  H    4.712796   5.917665   7.127783   7.317376   6.365164
    34  H    9.798004  11.095488  12.197907  12.118837  10.929639
    35  H    5.046558   4.025693   2.716894   2.822783   4.157028
    36  H    4.982946   3.972584   2.667139   2.764575   4.090502
    37  H    5.627207   4.310583   3.749437   4.779279   5.989843
    38  H    8.001648   6.651996   6.136758   7.154625   8.421095
    39  H    9.546010   8.170006   7.397635   8.215738   9.586025
    40  H    9.249326   7.957032   6.925225   7.430892   8.805719
    41  H    7.291164   6.132888   4.934961   5.186956   6.522512
    42  O    3.664187   4.798248   5.003066   4.154275   2.763612
    43  H    4.922572   6.280429   6.884349   6.312688   4.954920
                    6          7          8          9         10
     6  C    0.000000
     7  O    4.177268   0.000000
     8  C    1.497538   5.674025   0.000000
     9  C    2.573012   6.561186   1.483237   0.000000
    10  C    3.804494   7.884877   2.452048   1.349363   0.000000
    11  C    5.098171   9.028365   3.853975   2.526629   1.457793
    12  C    6.269916  10.313044   4.900389   3.753241   2.466667
    13  C    7.521377  11.467399   6.210005   4.958815   3.757997
    14  C    7.798671  11.498927   6.650186   5.247266   4.279002
    15  C    6.904714  10.374492   5.934342   4.461025   3.794487
    16  C    5.527149   9.096549   4.555637   3.078554   2.529556
    17  O    9.113629  12.716328   7.999277   6.579931   5.640601
    18  C    5.081076   1.430090   6.533806   7.601803   8.880060
    19  C    6.462364   2.391743   7.941616   8.920950  10.229311
    20  C    6.932814   2.852768   8.418726   9.251794  10.581620
    21  C    8.304548   4.201310   9.792228  10.584132  11.920425
    22  C    9.155950   4.986545  10.649557  11.523415  12.856395
    23  C    8.810177   4.739793  10.282163  11.265000  12.573853
    24  C    7.526071   3.592313   8.979152  10.018152  11.307476
    25  H    2.172875   4.463455   2.830629   2.712251   4.013092
    26  H    3.422660   2.523040   4.728358   5.073783   6.412489
    27  H    3.413592   2.745486   4.622647   5.949478   7.073757
    28  H    2.134460   4.593397   2.623545   4.101036   4.979754
    29  H    2.769316   6.298179   2.223180   1.083787   2.121435
    30  H    6.348788  10.495398   4.887726   4.006962   2.658531
    31  H    8.422305  12.439215   7.051569   5.890607   4.620540
    32  H    7.444510  10.620724   6.633401   5.151289   4.684784
    33  H    4.976646   8.255090   4.261299   2.808512   2.770628
    34  H    9.677873  13.412056   8.475854   7.112261   6.052482
    35  H    5.127942   2.082062   6.515651   7.661188   8.896302
    36  H    5.058521   2.070614   6.442734   7.594857   8.825622
    37  H    6.379511   2.594443   7.838266   8.580715   9.905319
    38  H    8.825962   4.864842  10.293326  10.984737  12.317876
    39  H   10.214588   6.041448  11.709929  12.553926  13.891712
    40  H    9.656590   5.675596  11.108459  12.127684  13.421885
    41  H    7.487258   3.906970   8.882658  10.001571  11.248412
    42  O    2.365517   6.350359   1.232024   2.364405   2.788173
    43  H    4.065055   8.240440   2.575147   2.067539   1.089146
                   11         12         13         14         15
    11  C    0.000000
    12  C    1.406400   0.000000
    13  C    2.442447   1.390876   0.000000
    14  C    2.822052   2.412236   1.398705   0.000000
    15  C    2.440559   2.785113   2.423879   1.403026   0.000000
    16  C    1.411648   2.408594   2.787961   2.413102   1.385206
    17  O    4.183164   3.678162   2.425465   1.362250   2.361504
    18  C   10.115552  11.340453  12.556127  12.687673  11.620110
    19  C   11.406091  12.673226  13.846938  13.889529  12.757252
    20  C   11.665644  12.974827  14.082524  14.018972  12.828613
    21  C   12.967258  14.293769  15.371770  15.252118  14.027693
    22  C   13.951947  15.265043  16.376848  16.297732  15.086848
    23  C   13.741421  15.015619  16.180730  16.192145  15.031454
    24  C   12.514969  13.760774  14.955824  15.030204  13.912686
    25  H    4.828037   6.207289   7.203632   7.083225   5.917514
    26  H    7.289248   8.665600   9.658200   9.472379   8.239020
    27  H    8.448589   9.519612  10.831309  11.195346  10.316713
    28  H    6.424948   7.331805   8.693375   9.241645   8.557181
    29  H    2.818638   4.197755   5.214733   5.212471   4.185929
    30  H    2.154613   1.086446   2.143279   3.393693   3.871554
    31  H    3.424949   2.154177   1.087799   2.159888   3.411204
    32  H    3.429273   3.869679   3.398595   2.147035   1.084748
    33  H    2.165449   3.398239   3.873157   3.390079   2.131568
    34  H    4.621910   3.835072   2.455976   1.913335   3.172979
    35  H   10.173826  11.355565  12.601074  12.797351  11.776386
    36  H   10.107920  11.279935  12.528697  12.737003  11.727260
    37  H   10.938118  12.255127  13.328967  13.229764  12.030880
    38  H   13.293082  14.635398  15.660261  15.468400  14.214868
    39  H   14.961898  16.286921  17.378373  17.261505  16.028847
    40  H   14.609402  15.867229  17.046655  17.082191  15.934464
    41  H   12.503560  13.702008  14.932014  15.082300  14.017507
    42  O    4.240450   4.997540   6.377788   7.051834   6.552472
    43  H    2.170556   2.629933   4.019705   4.834554   4.610959
                   16         17         18         19         20
    16  C    0.000000
    17  O    3.633379   0.000000
    18  C   10.307474  13.939840   0.000000
    19  C   11.486347  15.102732   1.508954   0.000000
    20  C   11.616422  15.179790   2.529226   1.400420   0.000000
    21  C   12.852243  16.380006   3.809955   2.424068   1.393763
    22  C   13.886611  17.446760   4.313213   2.804929   2.419780
    23  C   13.783278  17.385294   3.807061   2.426817   2.789841
    24  C   12.632586  16.253172   2.519859   1.398183   2.412836
    25  H    4.671493   8.267229   5.754429   6.840682   6.961845
    26  H    7.066404  10.599730   3.951549   4.704572   4.658336
    27  H    8.940061  12.519682   2.565090   4.058236   4.991278
    28  H    7.177534  10.597839   4.912376   6.419778   7.193096
    29  H    2.838486   6.470251   7.476385   8.688663   8.896371
    30  H    3.395863   4.562654  11.419300  12.809652  13.195850
    31  H    3.875761   2.691870  13.487951  14.808093  15.075022
    32  H    2.158664   2.562707  11.926973  12.975582  12.957656
    33  H    1.085286   4.491749   9.521118  10.633863  10.708541
    34  H    4.323311   0.966557  14.596597  15.802520  15.921813
    35  H   10.445172  14.069939   1.097864   2.153789   3.419838
    36  H   10.394516  14.012176   1.100171   2.156707   2.956634
    37  H   10.843970  14.370246   2.726139   2.151231   1.085261
    38  H   13.092556  16.550651   4.678028   3.405815   2.150356
    39  H   14.853245  18.388094   5.399196   3.890966   3.403841
    40  H   14.679417  18.282681   4.671487   3.407676   3.875886
    41  H   12.711795  16.331890   2.718157   2.154462   3.399051
    42  O    5.224112   8.413903   7.002923   8.475956   9.074657
    43  H    3.468809   6.181317   9.101611  10.516336  10.968056
                   21         22         23         24         25
    21  C    0.000000
    22  C    1.396959   0.000000
    23  C    2.413865   1.394624   0.000000
    24  C    2.785081   2.417008   1.396033   0.000000
    25  H    8.211897   9.219183   9.132174   8.020197   0.000000
    26  H    5.831974   6.850747   6.884724   5.916090   2.461387
    27  H    6.326197   6.845049   6.202100   4.830265   4.961621
    28  H    8.575108   9.222452   8.638485   7.265476   4.290854
    29  H   10.178753  11.169156  11.009448   9.829910   2.011446
    30  H   14.545587  15.474556  15.152931  13.857738   6.644963
    31  H   16.378286  17.372828  17.147951  15.902567   8.236398
    32  H   14.095942  15.179200  15.199374  14.143322   6.174124
    33  H   11.912305  12.958700  12.901975  11.793046   3.794806
    34  H   17.147397  18.202958  18.104488  16.942211   8.992867
    35  H    4.570574   4.810387   4.012948   2.622603   6.027243
    36  H    4.224480   4.789845   4.343475   3.123340   5.963788
    37  H    2.155805   3.404749   3.875059   3.394537   6.244454
    38  H    1.086185   2.156334   3.399203   3.871248   8.529747
    39  H    2.157532   1.086038   2.155495   3.402255  10.197687
    40  H    3.400556   2.155881   1.086066   2.152898  10.055998
    41  H    3.872310   3.400534   2.153638   1.087272   8.204098
    42  O   10.465394  11.248413  10.777250   9.428754   4.046897
    43  H   12.335891  13.219445  12.853298  11.542369   4.762866
                   26         27         28         29         30
    26  H    0.000000
    27  H    4.302287   0.000000
    28  H    4.948356   2.474818   0.000000
    29  H    4.471513   6.158528   4.666877   0.000000
    30  H    9.065299   9.420106   7.100988   4.679584   0.000000
    31  H   10.696103  11.666826   9.442990   6.234895   2.469839
    32  H    8.345956  10.827115   9.237450   4.675978   4.956084
    33  H    6.112623   8.354853   6.823888   2.208024   4.301629
    34  H   11.370108  13.059146  11.031613   7.123564   4.549552
    35  H    4.448324   2.336454   4.697987   7.624011  11.377578
    36  H    4.406335   2.295427   4.633485   7.567304  11.292566
    37  H    3.979686   4.879987   6.855021   8.177931  12.514754
    38  H    6.144757   7.120438   9.261225  10.507993  14.941623
    39  H    7.794006   7.927657  10.307957  12.166753  16.518338
    40  H    7.845945   6.920502   9.362505  11.903328  15.977139
    41  H    6.290968   4.589626   6.996067   9.904908  13.734975
    42  O    5.774048   4.775128   2.389443   3.316973   4.713162
    43  H    7.049041   7.065239   4.764494   3.050355   2.355078
                   31         32         33         34         35
    31  H    0.000000
    32  H    4.296222   0.000000
    33  H    4.960950   2.472284   0.000000
    34  H    2.304595   3.508966   5.267662   0.000000
    35  H   13.504815  12.132349   9.705159  14.696203   0.000000
    36  H   13.426304  12.093831   9.666806  14.631712   1.773935
    37  H   14.328697  12.140058   9.929398  15.120414   3.761856
    38  H   16.681208  14.219685  12.127012  17.342474   5.525965
    39  H   18.384045  16.081733  13.905572  19.161030   5.876256
    40  H   18.002704  16.114198  13.809899  18.992718   4.688663
    41  H   15.846685  14.308103  11.922963  16.985207   2.372241
    42  O    7.078757   7.371668   5.142807   8.768161   6.875956
    43  H    4.688260   5.581469   3.839118   6.446774   9.043741
                   36         37         38         39         40
    36  H    0.000000
    37  H    3.001323   0.000000
    38  H    5.019332   2.480338   0.000000
    39  H    5.852666   4.302300   2.485917   0.000000
    40  H    5.195330   4.961082   4.299958   2.486324   0.000000
    41  H    3.293641   4.292977   4.958461   4.298163   2.475381
    42  O    6.796826   8.563091  11.031100  12.325617  11.550313
    43  H    8.965992  10.340435  12.792592  14.276204  13.666454
                   41         42         43
    41  H    0.000000
    42  O    9.225097   0.000000
    43  H   11.404858   2.390611   0.000000
 Stoichiometry    C22H18O3
 Framework group  C1[X(C22H18O3)]
 Deg. of freedom   123
 Full point group                 C1      NOp   1
 Largest Abelian subgroup         C1      NOp   1
 Largest concise Abelian subgroup C1      NOp   1
                         Standard orientation:                         
 ---------------------------------------------------------------------
 Center     Atomic      Atomic             Coordinates (Angstroms)
 Number     Number       Type             X           Y           Z
 ---------------------------------------------------------------------
      1          6           0        0.100634   -0.352694    0.047981
      2          6           0        1.433539   -0.732975    0.094729
      3          6           0        2.446841    0.235962    0.033169
      4          6           0        2.103616    1.592080   -0.075200
      5          6           0        0.761918    1.955092   -0.123249
      6          6           0       -0.264981    1.001747   -0.062891
      7          8           0        3.720352   -0.240414    0.091128
      8          6           0       -1.675822    1.500269   -0.123075
      9          6           0       -2.794242    0.530240   -0.032677
     10          6           0       -4.069203    0.967925   -0.093394
     11          6           0       -5.297271    0.185993   -0.018613
     12          6           0       -6.532589    0.847989   -0.135707
     13          6           0       -7.738907    0.158310   -0.075087
     14          6           0       -7.736052   -1.228251    0.108805
     15          6           0       -6.517498   -1.912799    0.231279
     16          6           0       -5.323726   -1.213008    0.168051
     17          8           0       -8.877763   -1.968096    0.178456
     18          6           0        4.805886    0.686219    0.000990
     19          6           0        6.105652   -0.080065    0.019956
     20          6           0        6.257495   -1.249852   -0.734842
     21          6           0        7.475982   -1.926386   -0.747771
     22          6           0        8.559868   -1.437738   -0.014349
     23          6           0        8.415601   -0.272738    0.738603
     24          6           0        7.191700    0.398496    0.759142
     25          1           0       -0.653518   -1.130170    0.096345
     26          1           0        1.720222   -1.775778    0.179849
     27          1           0        2.866122    2.360270   -0.119648
     28          1           0        0.476524    2.997967   -0.208484
     29          1           0       -2.571430   -0.524078    0.082929
     30          1           0       -6.542589    1.925011   -0.278150
     31          1           0       -8.680986    0.693942   -0.169388
     32          1           0       -6.534941   -2.987683    0.376185
     33          1           0       -4.391739   -1.759982    0.268373
     34          1           0       -9.642757   -1.385187    0.082362
     35          1           0        4.767928    1.397174    0.836697
     36          1           0        4.711609    1.262786   -0.931243
     37          1           0        5.412469   -1.632395   -1.298210
     38          1           0        7.580947   -2.835987   -1.332071
     39          1           0        9.509183   -1.965108   -0.026982
     40          1           0        9.250654    0.109929    1.318080
     41          1           0        7.080381    1.299855    1.356903
     42          8           0       -1.894755    2.706382   -0.246539
     43          1           0       -4.191398    2.043564   -0.213018
 ---------------------------------------------------------------------
 Rotational constants (GHZ):      0.8344319      0.0501125      0.0476260
 Standard basis: 6-31G(d,p) (6D, 7F)
 There are   465 symmetry adapted basis functions of A   symmetry.
 Integral buffers will be    262144 words long.
 Raffenetti 2 integral format.
 Two-electron integral symmetry is turned on.
   465 basis functions,   826 primitive gaussians,   465 cartesian basis functions
    87 alpha electrons       87 beta electrons
       nuclear repulsion energy      1775.8505456198 Hartrees.
 NAtoms=   43 NActive=   43 NUniq=   43 SFac= 7.50D-01 NAtFMM=   80 NAOKFM=F Big=F
 One-electron integrals computed using PRISM.
 NBasis=   465 RedAO= T  NBF=   465
 NBsUse=   465 1.00D-06 NBFU=   465
 Initial guess read from the read-write file.
 B after Tr=     0.000000    0.000000    0.000000
         Rot=    1.000000    0.000000    0.000000    0.000000 Ang=   0.00 deg.
 Initial guess orbital symmetries:
       Occupied  (A) (A) (A) (A) (A) (A) (A) (A) (A) (A) (A) (A)
                 (A) (A) (A) (A) (A) (A) (A) (A) (A) (A) (A) (A)
                 (A) (A) (A) (A) (A) (A) (A) (A) (A) (A) (A) (A)
                 (A) (A) (A) (A) (A) (A) (A) (A) (A) (A) (A) (A)
                 (A) (A) (A) (A) (A) (A) (A) (A) (A) (A) (A) (A)
                 (A) (A) (A) (A) (A) (A) (A) (A) (A) (A) (A) (A)
                 (A) (A) (A) (A) (A) (A) (A) (A) (A) (A) (A) (A)
                 (A) (A) (A)
       Virtual   (A) (A) (A) (A) (A) (A) (A) (A) (A) (A) (A) (A)
                 (A) (A) (A) (A) (A) (A) (A) (A) (A) (A) (A) (A)
                 (A) (A) (A) (A) (A) (A) (A) (A) (A) (A) (A) (A)
                 (A) (A) (A) (A) (A) (A) (A) (A) (A) (A) (A) (A)
                 (A) (A) (A) (A) (A) (A) (A) (A) (A) (A) (A) (A)
                 (A) (A) (A) (A) (A) (A) (A) (A) (A) (A) (A) (A)
                 (A) (A) (A) (A) (A) (A) (A) (A) (A) (A) (A) (A)
                 (A) (A) (A) (A) (A) (A) (A) (A) (A) (A) (A) (A)
                 (A) (A) (A) (A) (A) (A) (A) (A) (A) (A) (A) (A)
                 (A) (A) (A) (A) (A) (A) (A) (A) (A) (A) (A) (A)
                 (A) (A) (A) (A) (A) (A) (A) (A) (A) (A) (A) (A)
                 (A) (A) (A) (A) (A) (A) (A) (A) (A) (A) (A) (A)
                 (A) (A) (A) (A) (A) (A) (A) (A) (A) (A) (A) (A)
                 (A) (A) (A) (A) (A) (A) (A) (A) (A) (A) (A) (A)
                 (A) (A) (A) (A) (A) (A) (A) (A) (A) (A) (A) (A)
                 (A) (A) (A) (A) (A) (A) (A) (A) (A) (A) (A) (A)
                 (A) (A) (A) (A) (A) (A) (A) (A) (A) (A) (A) (A)
                 (A) (A) (A) (A) (A) (A) (A) (A) (A) (A) (A) (A)
                 (A) (A) (A) (A) (A) (A) (A) (A) (A) (A) (A) (A)
                 (A) (A) (A) (A) (A) (A) (A) (A) (A) (A) (A) (A)
                 (A) (A) (A) (A) (A) (A) (A) (A) (A) (A) (A) (A)
                 (A) (A) (A) (A) (A) (A) (A) (A) (A) (A) (A) (A)
                 (A) (A) (A) (A) (A) (A) (A) (A) (A) (A) (A) (A)
                 (A) (A) (A) (A) (A) (A) (A) (A) (A) (A) (A) (A)
                 (A) (A) (A) (A) (A) (A) (A) (A) (A) (A) (A) (A)
                 (A) (A) (A) (A) (A) (A) (A) (A) (A) (A) (A) (A)
                 (A) (A) (A) (A) (A) (A) (A) (A) (A) (A) (A) (A)
                 (A) (A) (A) (A) (A) (A) (A) (A) (A) (A) (A) (A)
                 (A) (A) (A) (A) (A) (A) (A) (A) (A) (A) (A) (A)
                 (A) (A) (A) (A) (A) (A) (A) (A) (A) (A) (A) (A)
                 (A) (A) (A) (A) (A) (A) (A) (A) (A) (A) (A) (A)
                 (A) (A) (A) (A) (A) (A)
 Harris functional with IExCor=  402 diagonalized for initial guess.
 ExpMin= 1.61D-01 ExpMax= 5.48D+03 ExpMxC= 8.25D+02 IAcc=1 IRadAn=         1 AccDes= 0.00D+00
 HarFok:  IExCor=  402 AccDes= 0.00D+00 IRadAn=         1 IDoV= 1
 ScaDFX=  1.000000  1.000000  1.000000  1.000000
 FoFCou: FMM=F IPFlag=           0 FMFlag=      100000 FMFlg1=           0
         NFxFlg=           0 DoJE=T BraDBF=F KetDBF=T FulRan=T
         Omega=  0.000000  0.000000  1.000000  0.000000  0.000000 ICntrl=     500 IOpCl=  0
         NMat0=    1 NMatS0=    1 NMatT0=    0 NMatD0=    1 NMtDS0=    0 NMtDT0=    0
         I1Cent=           4 NGrid=           0.
 Petite list used in FoFCou.
 Requested convergence on RMS density matrix=1.00D-08 within 128 cycles.
 Requested convergence on MAX density matrix=1.00D-06.
 Requested convergence on             energy=1.00D-06.
 No special actions if energy rises.
 Integral accuracy reduced to 1.0D-05 until final iterations.
 Initial convergence to 1.0D-05 achieved.  Increase integral accuracy.
 SCF Done:  E(RB3LYP) =  -1074.86450792     A.U. after   10 cycles
             Convg  =    0.5001D-08             -V/T =  2.0095
 Calling FoFJK, ICntrl=      2127 FMM=F ISym2X=0 I1Cent= 0 IOpClX= 0 NMat=1 NMatS=1 NMatT=0.
 ***** Axes restored to original set *****
 -------------------------------------------------------------------
 Center     Atomic                   Forces (Hartrees/Bohr)
 Number     Number              X              Y              Z
 -------------------------------------------------------------------
      1        6          -0.000108169   -0.000006265    0.000069359
      2        6          -0.000050074   -0.000010643   -0.000024224
      3        6          -0.000005626   -0.000012103    0.000000896
      4        6          -0.000009540    0.000002599   -0.000016304
      5        6          -0.000092275    0.000047366   -0.000063707
      6        6           0.000269660    0.000052612   -0.000074196
      7        8           0.000031426    0.000007461   -0.000006624
      8        6          -0.001040387   -0.000185108    0.000142295
      9        6           0.000451278    0.000018206    0.000178177
     10        6          -0.000263701    0.000152998    0.000015205
     11        6           0.000011485   -0.000015550    0.000188458
     12        6          -0.000010229    0.000008240   -0.000020068
     13        6          -0.000002639    0.000014203   -0.000038451
     14        6           0.000058554   -0.000002604   -0.000016203
     15        6           0.000044048   -0.000000649   -0.000007283
     16        6           0.000138074   -0.000018184   -0.000031003
     17        8          -0.000050721    0.000017224   -0.000009869
     18        6          -0.000007409   -0.000003876   -0.000003660
     19        6          -0.000015220   -0.000009554    0.000005251
     20        6          -0.000003272    0.000003920   -0.000007010
     21        6           0.000006668   -0.000000880    0.000007662
     22        6          -0.000006886   -0.000010561   -0.000000817
     23        6           0.000003104   -0.000000018   -0.000005728
     24        6           0.000006183   -0.000003785    0.000004568
     25        1           0.000042418   -0.000022140    0.000026731
     26        1           0.000005992   -0.000009025   -0.000006441
     27        1           0.000004914    0.000008091   -0.000005356
     28        1           0.000025968   -0.000001640    0.000001714
     29        1           0.000002241    0.000085024   -0.000097060
     30        1           0.000003989   -0.000009274   -0.000007473
     31        1          -0.000000657   -0.000001703   -0.000001358
     32        1          -0.000007502   -0.000017330    0.000005599
     33        1          -0.000075697   -0.000041894    0.000002558
     34        1           0.000003262   -0.000011650    0.000007859
     35        1          -0.000007267    0.000007904    0.000000312
     36        1           0.000010022    0.000007527    0.000001570
     37        1           0.000003495   -0.000002950    0.000000633
     38        1           0.000002317   -0.000007401   -0.000001659
     39        1          -0.000000697   -0.000004801   -0.000000455
     40        1          -0.000003825   -0.000000645    0.000000686
     41        1          -0.000002832    0.000003057    0.000001229
     42        8           0.000659296    0.000059037   -0.000146834
     43        1          -0.000019770   -0.000085236   -0.000068980
 -------------------------------------------------------------------
 Cartesian Forces:  Max     0.001040387 RMS     0.000129174

 GradGradGradGradGradGradGradGradGradGradGradGradGradGradGradGradGradGrad
 Berny optimization.
 Using GEDIIS/GDIIS optimizer.
 Internal  Forces:  Max     0.000656172 RMS     0.000063339
 Search for a local minimum.
 Step number   7 out of a maximum of  227
 All quantities printed in internal units (Hartrees-Bohrs-Radians)
 Mixed Optimization -- En-DIIS/RFO-DIIS
 Swaping is turned off.
 Update second derivatives using D2CorX and points    1    2    3    4    5
                                                      6    7
 DE= -2.80D-05 DEPred=-2.62D-05 R= 1.07D+00
 SS=  1.41D+00  RLast= 3.38D-02 DXNew= 1.1436D+00 1.0129D-01
 Trust test= 1.07D+00 RLast= 3.38D-02 DXMaxT set to 6.80D-01
     Eigenvalues ---    0.00495   0.00652   0.01012   0.01263   0.01294
     Eigenvalues ---    0.01516   0.01636   0.01776   0.01853   0.01963
     Eigenvalues ---    0.01990   0.02058   0.02085   0.02088   0.02091
     Eigenvalues ---    0.02095   0.02103   0.02117   0.02120   0.02125
     Eigenvalues ---    0.02129   0.02131   0.02137   0.02139   0.02143
     Eigenvalues ---    0.02147   0.02148   0.02149   0.02152   0.02156
     Eigenvalues ---    0.02170   0.02176   0.02184   0.02193   0.02203
     Eigenvalues ---    0.02210   0.02667   0.03151   0.06388   0.07338
     Eigenvalues ---    0.11387   0.13891   0.14603   0.15907   0.15998
     Eigenvalues ---    0.15999   0.15999   0.16000   0.16000   0.16000
     Eigenvalues ---    0.16000   0.16000   0.16000   0.16000   0.16001
     Eigenvalues ---    0.16006   0.16032   0.16170   0.19881   0.21399
     Eigenvalues ---    0.22000   0.22000   0.22001   0.22018   0.22079
     Eigenvalues ---    0.22961   0.22967   0.23471   0.23875   0.24015
     Eigenvalues ---    0.24085   0.24978   0.24997   0.25000   0.25001
     Eigenvalues ---    0.25016   0.27918   0.29907   0.31466   0.33477
     Eigenvalues ---    0.33648   0.33907   0.35020   0.35131   0.35209
     Eigenvalues ---    0.35261   0.35274   0.35277   0.35363   0.35402
     Eigenvalues ---    0.35410   0.35436   0.35462   0.35483   0.35621
     Eigenvalues ---    0.35643   0.36298   0.37348   0.40145   0.40979
     Eigenvalues ---    0.41161   0.41628   0.41842   0.41956   0.41976
     Eigenvalues ---    0.42387   0.44663   0.44801   0.45061   0.45452
     Eigenvalues ---    0.45836   0.46030   0.46031   0.46356   0.46523
     Eigenvalues ---    0.46553   0.47657   0.48039   0.52523   0.52793
     Eigenvalues ---    0.54077   0.58699   0.935431000.000001000.00000
     Eigenvalues --- 1000.000001000.000001000.000001000.000001000.00000
     Eigenvalues --- 1000.000001000.000001000.000001000.000001000.00000
     Eigenvalues --- 1000.000001000.000001000.000001000.000001000.00000
     Eigenvalues --- 1000.000001000.000001000.000001000.000001000.00000
     Eigenvalues --- 1000.000001000.000001000.000001000.000001000.00000
     Eigenvalues --- 1000.000001000.000001000.000001000.000001000.00000
     Eigenvalues --- 1000.000001000.000001000.000001000.000001000.00000
     Eigenvalues --- 1000.000001000.000001000.000001000.000001000.00000
     Eigenvalues --- 1000.000001000.000001000.000001000.000001000.00000
     Eigenvalues --- 1000.000001000.000001000.000001000.000001000.00000
     Eigenvalues --- 1000.000001000.000001000.000001000.000001000.00000
     Eigenvalues --- 1000.000001000.000001000.000001000.000001000.00000
     Eigenvalues --- 1000.000001000.000001000.000001000.000001000.00000
     Eigenvalues --- 1000.000001000.000001000.000001000.000001000.00000
     Eigenvalues --- 1000.000001000.000001000.000001000.000001000.00000
     Eigenvalues --- 1000.000001000.000001000.000001000.000001000.00000
     Eigenvalues --- 1000.000001000.000001000.000001000.000001000.00000
     Eigenvalues --- 1000.000001000.000001000.000001000.000001000.00000
     Eigenvalues --- 1000.000001000.00000
 En-DIIS/RFO-DIIS IScMMF=        0 using points:     7    6    5    4
 RFO step:  Lambda=-1.73476086D-06.
 DIIS coeffs:      0.95294     -0.00520      0.04195      0.01031
 Iteration  1 RMS(Cart)=  0.00504453 RMS(Int)=  0.00000760
 Iteration  2 RMS(Cart)=  0.00001364 RMS(Int)=  0.00000032
 Iteration  3 RMS(Cart)=  0.00000000 RMS(Int)=  0.00000032
 Variable       Old X    -DE/DX   Delta X   Delta X   Delta X     New X
                                  (DIIS)     (GDIIS)  (Total)
    R1        2.62082  -0.00003  -0.00002  -0.00005  -0.00007   2.62075
    R2        2.65940   0.00010   0.00004   0.00020   0.00023   2.65964
    R3        2.04890  -0.00005  -0.00002  -0.00008  -0.00009   2.04880
    R4        2.65196   0.00002   0.00003   0.00000   0.00003   2.65199
    R5        2.05005  -0.00001   0.00000  -0.00002  -0.00002   2.05002
    R6        2.65142   0.00000  -0.00002   0.00008   0.00006   2.65147
    R7        2.57178  -0.00001   0.00000  -0.00001  -0.00001   2.57177
    R8        2.62817  -0.00002   0.00001  -0.00010  -0.00009   2.62809
    R9        2.04711   0.00000   0.00000   0.00000   0.00000   2.04711
   R10        2.65036  -0.00011  -0.00005  -0.00020  -0.00025   2.65010
   R11        2.04955   0.00002   0.00000   0.00006   0.00006   2.04961
   R12        2.82994  -0.00011   0.00003  -0.00056  -0.00053   2.82941
   R13        2.70248  -0.00001   0.00001  -0.00003  -0.00002   2.70246
   R14        2.80291  -0.00028  -0.00019  -0.00074  -0.00093   2.80198
   R15        2.32819   0.00066   0.00020   0.00054   0.00074   2.32893
   R16        2.54993  -0.00003   0.00011   0.00022   0.00033   2.55026
   R17        2.04806  -0.00004   0.00004  -0.00024  -0.00020   2.04786
   R18        2.75483  -0.00013  -0.00015   0.00018   0.00003   2.75486
   R19        2.05819   0.00001   0.00008  -0.00026  -0.00018   2.05801
   R20        2.65771   0.00008   0.00008   0.00008   0.00015   2.65786
   R21        2.66763  -0.00009  -0.00004  -0.00016  -0.00020   2.66743
   R22        2.62838   0.00002  -0.00004   0.00015   0.00012   2.62849
   R23        2.05309   0.00001   0.00001  -0.00002  -0.00001   2.05308
   R24        2.64317  -0.00003   0.00004  -0.00022  -0.00018   2.64299
   R25        2.05564   0.00000   0.00000   0.00002   0.00002   2.05566
   R26        2.65133   0.00000  -0.00003   0.00005   0.00002   2.65135
   R27        2.57428   0.00004  -0.00001   0.00012   0.00011   2.57439
   R28        2.61766   0.00000   0.00002  -0.00003  -0.00001   2.61765
   R29        2.04988   0.00001   0.00000   0.00001   0.00001   2.04989
   R30        2.05089   0.00002   0.00002  -0.00003   0.00000   2.05089
   R31        1.82653  -0.00001   0.00000  -0.00002  -0.00002   1.82651
   R32        2.85151   0.00001   0.00000   0.00003   0.00003   2.85154
   R33        2.07466   0.00000   0.00000   0.00001   0.00001   2.07467
   R34        2.07902   0.00000   0.00000   0.00000   0.00000   2.07902
   R35        2.64641   0.00000   0.00000  -0.00001  -0.00001   2.64640
   R36        2.64218   0.00000   0.00000   0.00001   0.00001   2.64219
   R37        2.63383   0.00000   0.00000   0.00001   0.00001   2.63384
   R38        2.05085   0.00000   0.00000  -0.00001  -0.00001   2.05084
   R39        2.63987  -0.00001   0.00000  -0.00002  -0.00002   2.63985
   R40        2.05259   0.00000   0.00000   0.00000   0.00000   2.05259
   R41        2.63546   0.00000   0.00000   0.00001   0.00001   2.63547
   R42        2.05231   0.00000   0.00000   0.00000   0.00000   2.05231
   R43        2.63812  -0.00001   0.00000  -0.00001  -0.00001   2.63811
   R44        2.05237   0.00000   0.00000   0.00000   0.00000   2.05237
   R45        2.05465   0.00000   0.00000   0.00000   0.00000   2.05465
    A1        2.11326   0.00000  -0.00001   0.00011   0.00009   2.11335
    A2        2.06051   0.00000   0.00001   0.00004   0.00005   2.06055
    A3        2.10942   0.00000   0.00000  -0.00014  -0.00014   2.10927
    A4        2.09805  -0.00003  -0.00001  -0.00016  -0.00018   2.09787
    A5        2.11788   0.00001   0.00001   0.00005   0.00006   2.11794
    A6        2.06726   0.00002   0.00000   0.00012   0.00012   2.06737
    A7        2.08759   0.00001   0.00001   0.00003   0.00003   2.08762
    A8        2.01765   0.00002   0.00000   0.00010   0.00009   2.01774
    A9        2.17794  -0.00003   0.00000  -0.00012  -0.00012   2.17782
   A10        2.08397   0.00002   0.00001   0.00009   0.00010   2.08407
   A11        2.11342   0.00000   0.00001   0.00000   0.00001   2.11343
   A12        2.08580  -0.00002  -0.00002  -0.00009  -0.00011   2.08568
   A13        2.12638   0.00000  -0.00001  -0.00006  -0.00007   2.12631
   A14        2.10313  -0.00001   0.00003  -0.00021  -0.00018   2.10295
   A15        2.05367   0.00002  -0.00002   0.00028   0.00025   2.05392
   A16        2.05712   0.00001   0.00002   0.00000   0.00002   2.05714
   A17        2.17526   0.00005   0.00002  -0.00016  -0.00014   2.17512
   A18        2.05081  -0.00006  -0.00004   0.00016   0.00011   2.05092
   A19        2.07238   0.00000   0.00000   0.00001   0.00002   2.07240
[truncated: 579,198 more chars]
