# Supplementary material for: Substitution effect on chalcone based materials for corrosion and photocrosslinking applications
Source: Royal Society of Chemistry journal article supplement (doi:10.1039/c4ra10884a), 2014-11-19
Supplement: c4ra10884a5.pdf [file c4ra10884a5.pdf]

## Substitution effect on chalcone based materials for corrosion and photocrosslinking applications

V. Ramkumar, S. Anandhi, P. Kannan and R. Gopalakrishnan.

### SUPPLEMENTARY DETAILS

The additional information's are given as supporting file.

- 1) Details of data collection, solution and refinement, fractional coordinate with anisotropic thermal parameters and lists of bond lengths and angles. The CIF data of crystal **III**, Cambridge Crystallographic Data Centre (CCDC) deposition number is 909642.
- 2) Video on HOPM frames of crystal **III** with the isotropic to crystalline phase.
- 3) **Figure S 1.** Harvested single crystal images of chalcone **III**.
- 4) **Figure S 2.** FT-IR spectra of the intermediate and the final product of chalcone **III**.
- 5). **Figure S 3.** ORTEP Diagram of materials **I**, **II** and **III**.
- 6) **Table S 1.** Hydrogen bonding coordinates data of crystal **III**.
- 7) Output file of Gaussian package is an evident for DFT calculation.

**Figure S 1.** Harvested single crystal images of chalcone **III**.

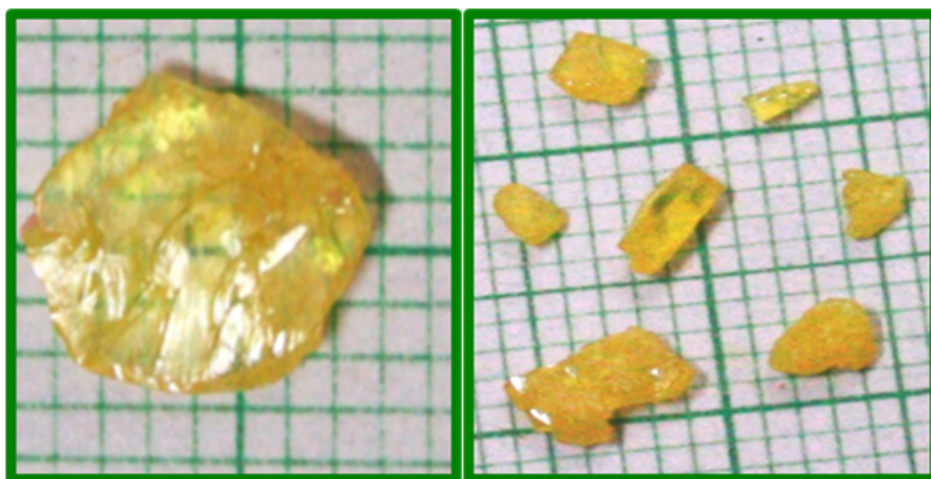

Figure S 2. FT-IR spectra of the intermediates and the final product of chalcone **III**.

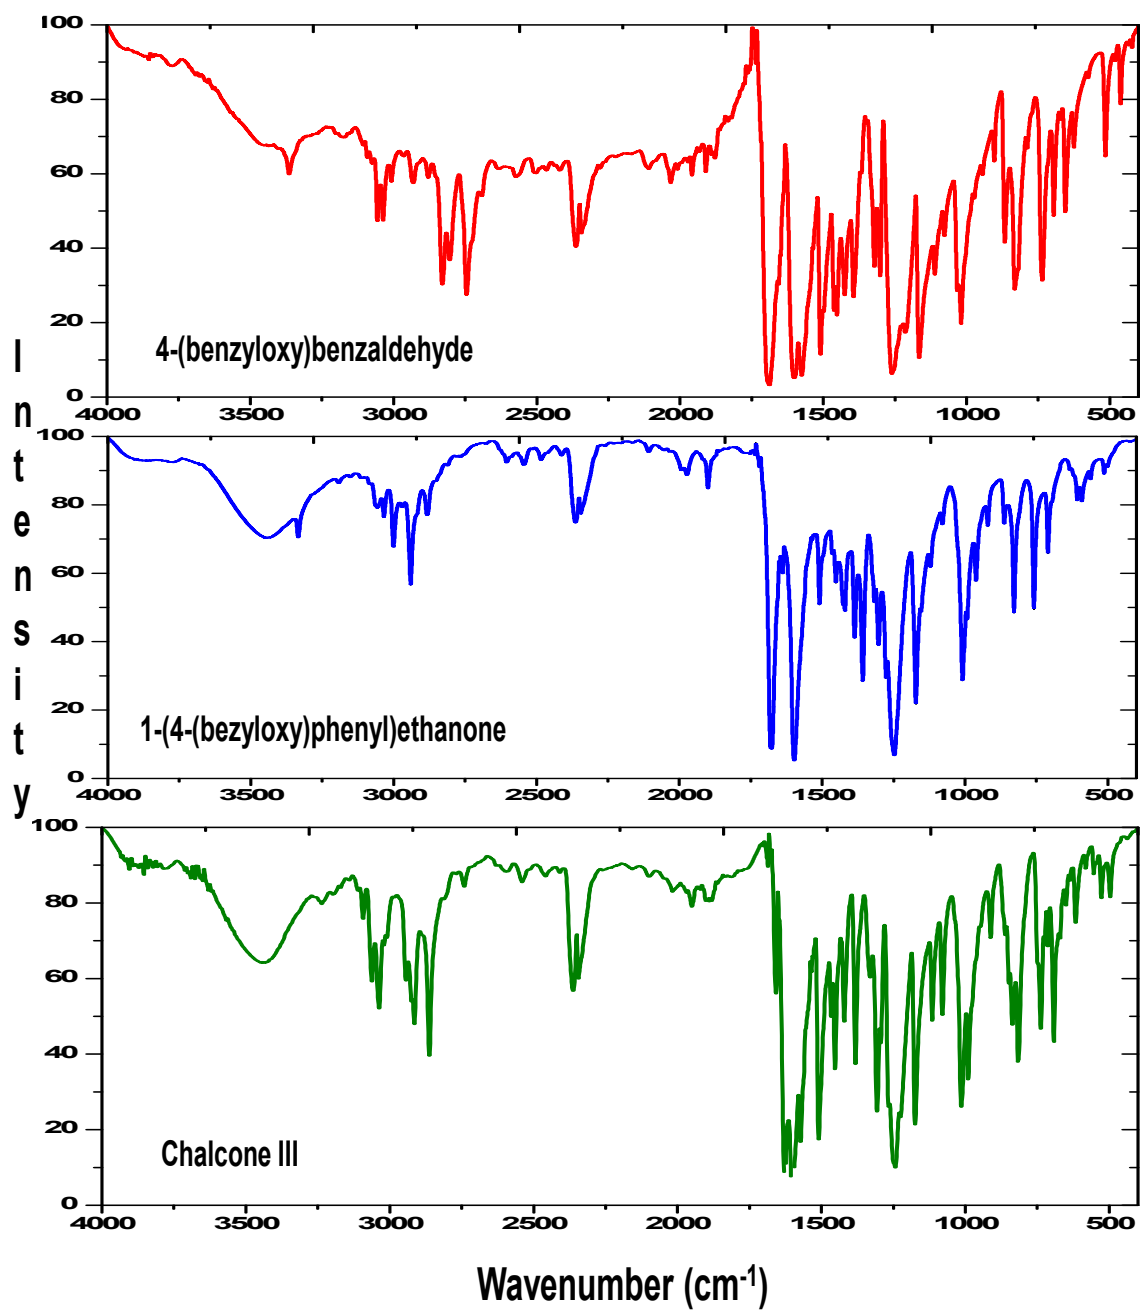

The FT-IR shows the following groups are present in the chalcone intermediate and the final product.

| Wave number (cm <sup>-1</sup> ) | Assignment                                |
|---------------------------------|-------------------------------------------|
| ~ 3058                          | Aromatic proton stretching                |
| ~ 2933                          | Aliphatic protons stretching              |
| ~ 1660                          | C=O (carbonyl) stretching                 |
| ~ 1602                          | C=C stretching                            |
| ~ 1465                          | CH <sub>3</sub> bending (C-H-deformation) |
| ~ 1257                          | C-O stretching                            |
| ~ 829, 777, 661                 | Out of plane, C-H bending                 |

The <sup>1</sup>H-NMR spectral data of before photo-crosslinking were mentioned in manuscript.

#### <sup>1</sup>H-NMR of after photocrosslinking material I

<sup>1</sup>H-NMR (500 MHz, CDCl<sub>3</sub>) (δ/ppm): 3.75 (s, 2H, -OH); 4.25 (m, 4H, cyclobutane-CH); 5.2 (d, 4H, Ar-CH<sub>2</sub>); 6.78 (d, 4H, Ar-CH); 6.96 (d, 4H, Ar-CH); 7.23 (m, 10H, Ar-CH); 7.39 (d, 4H, Ar-H); 7.67 (d, 4H, Ar-CH).

#### <sup>1</sup>H-NMR of after photocrosslinking material II

<sup>1</sup>H-NMR (500 MHz, CDCl<sub>3</sub>) (δ/ppm): 3.51 (s, 2H, -OH); 4.25 (m, 4H, cyclobutane-CH); 5.2 (d, 4H, Ar-CH<sub>2</sub>); 6.81 (d, 4H, Ar-CH); 7.01 (d, 4H, Ar-CH); 7.16 (d, 4H, Ar-CH); 7.25 (m, 10H, Ar-CH); 7.71 (m, 4H, Ar-H).

#### <sup>1</sup>H-NMR of after photocrosslinking of material III

<sup>1</sup>H-NMR (500 MHz, CDCl<sub>3</sub>) (δ/ppm): 4.22 (m, 4H, cyclobutane-CH); 5.21 (d, 8H, Ar-CH<sub>2</sub>); 6.92 (d, 4H, Ar-CH); 7.07 (d, 4H, Ar-CH); 7.18 (m, 10H, Ar-CH); 7.23 (d, 4H, Ar-H); 7.82 (d, 4H, Ar-CH)

5). **Figure S 3.** ORTEP Diagram of materials **I, II** and **III**.

**Material I**

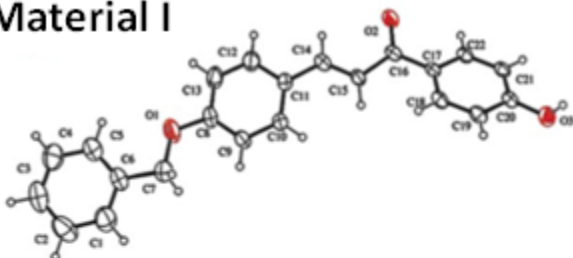

**Material II**

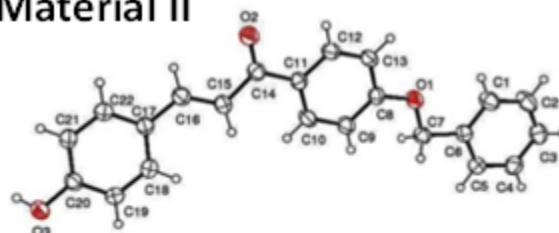

**Material III**

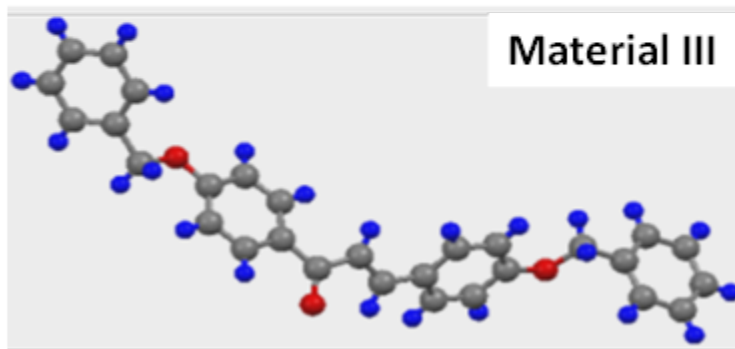

6) **Table S 1.** Hydrogen bonding coordinates data of crystal **III**.

| <b>CRYSTAL III</b> |          |          |          |              |
|--------------------|----------|----------|----------|--------------|
|                    | <b>x</b> | <b>y</b> | <b>z</b> | <b>U(eq)</b> |
| H(1)               | -216     | 2496     | -1057    | 65           |
| H(2)               | -1182    | 13328    | -1959    | 70           |
| H(3)               | -1647    | 10784    | -2983    | 71           |
| H(4)               | -1160    | 7354     | -3090    | 73           |
| H(5)               | -196     | 6541     | -2181    | 64           |
| H(7A)              | 799      | 8471     | -1311    | 67           |
| H(7B)              | 723      | 10295    | -682     | 67           |
| H(9)               | 583      | 3557     | 359      | 61           |
| H(10)              | 1426     | 1357     | 1044     | 62           |
| H(12)              | 2540     | 5874     | 486      | 65           |
| H(13)              | 1691     | 8036     | -245     | 65           |
| H(14)              | 2502     | 254      | 1264     | 58           |
| H(15)              | 3305     | 3944     | 1598     | 59           |
| H(18)              | 4657     | -1772    | 2701     | 56           |
| H(19)              | 5477     | -1036    | 3846     | 62           |
| H(21)              | 4705     | 5035     | 4094     | 69           |
| H(22)              | 3905     | 4323     | 2930     | 65           |
| H(23A)             | 6340     | 963      | 4593     | 71           |
| H(23B)             | 6098     | -111     | 5260     | 71           |
| H(25)              | 6677     | 752      | 6619     | 67           |
| H(26)              | 7378     | 2969     | 7585     | 76           |
| H(27)              | 7782     | 6252     | 7224     | 77           |
| H(28)              | 7510     | 7296     | 5898     | 89           |
| H(29)              | 6810     | 5103     | 4925     | 82           |
